# Supplementary material for: Comparative Proteomics of Root Apex and Root Elongation Zones Provides Insights into Molecular Mechanisms for Drought Stress and Recovery Adjustment in Switchgrass
Source: Proteomes. 2020 Feb 19;8(1):3. doi: 10.3390/proteomes8010003 (PMC7151713; doi:10.3390/proteomes8010003)
Supplement: Supplementary file 1 [file proteomes-08-00003-s001.zip]

Archive with 5 entries (5 files):
- Final_Revised_Supplemental Data/Supplementary Table S1  Pooling strategy for fractions.pdf
- Final_Revised_Supplemental Data/Table S4.  Supplemental data for Fig 3_Functional Groups of Proteins.xlsx
- Final_Revised_Supplemental Data/Table S5.  Supplemental data for Fig 4_Functional classification of differentially expressed proteins.xlsx
- Final_Revised_Supplemental Data/TableS2 List of drought-induced differentially expressed proteins from RT1 and RT2.xlsx
- Final_Revised_Supplemental Data/TableS3. List of proteins quantifed from RT1 and RT2  and annotation .xlsx
