# Supplementary material for: Comparative Proteomics of Root Apex and Root Elongation Zones Provides Insights into Molecular Mechanisms for Drought Stress and Recovery Adjustment in Switchgrass
Source: Proteomes. 2020 Feb 19;8(1):3. doi: 10.3390/proteomes8010003 (PMC7151713; doi:10.3390/proteomes8010003)
Supplement: Supplementary file 1 [file proteomes-08-00003-s001.zip › Final_Revised_Supplemental Data/Supplementary Table S1 Pooling strategy for fractions.pdf]

Supplementary Table S2 Pooling strategy for fractions 1-48 from 1st dimension separation

| First Dimension Fraction # |    | New Second Dimension Sample # |                                         |
|----------------------------|----|-------------------------------|-----------------------------------------|
| 1-4 to one tube            |    | pooled →                      | Too low A <sub>214</sub> , not analyzed |
| 5                          | 27 | pooled →                      | 1                                       |
| 6                          | 28 | pooled →                      | 2                                       |
| 7                          | 29 | pooled →                      | 3                                       |
| 8                          | 30 | pooled →                      | 4                                       |
| 9                          | 31 | pooled →                      | 5                                       |
| 10                         | 32 | pooled →                      | 6                                       |
| 11                         | 33 | pooled →                      | 7                                       |
| 12                         | 34 | pooled →                      | 8                                       |
| 13                         | 35 | pooled →                      | 9                                       |
| 14                         | 36 | pooled →                      | 10                                      |
| 15                         | 37 | pooled →                      | 11                                      |
| 16                         | 38 | pooled →                      | 12                                      |
| 17                         | 39 | pooled →                      | 13                                      |
| 18                         | 40 | pooled →                      | 14                                      |
| 19                         | 41 | pooled →                      | 15                                      |
| 20                         | 42 | pooled →                      | 16                                      |
| 21                         | 43 | pooled →                      | 17                                      |
| 22                         | 44 | pooled →                      | 18                                      |
| 23                         | 45 | pooled →                      | 19                                      |
| 24                         | 46 | pooled →                      | 20                                      |
| 25                         | 47 | pooled →                      | 21                                      |
| 26                         | 48 | pooled →                      | 22                                      |
