# Supplementary material for: Comparative Proteomics of Root Apex and Root Elongation Zones Provides Insights into Molecular Mechanisms for Drought Stress and Recovery Adjustment in Switchgrass
Source: Proteomes. 2020 Feb 19;8(1):3. doi: 10.3390/proteomes8010003 (PMC7151713; doi:10.3390/proteomes8010003)
Supplement: Supplementary file 1 [file proteomes-08-00003-s001.zip › Final_Revised_Supplemental Data/Table S4. Supplemental data for Fig 3_Functional Groups of Proteins.xlsx]

## Sheet: RT1-SDT
Treatment	pro_hit_num	pro_acc	pro_ID	pro_acc_ID	log2_fold	fold_change	p_value	num_pep	at_acc	at_annota	Functional group	RT1-SDT	Protein No		RT1-SDT	Protein No
RT1-SDT	4070	Pavir.Aa03204.1	30252735	Pavir.Aa03204.1.p|PACid:30252735	-0.2697	0.829492015897382	0.0007	8	AT2G18250.1	4-phosphopantetheine adenylyltransferase	Abiotic/biotic stress	Abiotic/biotic stress	2		Abiotic/biotic stress	2
RT1-SDT	8143	Pavir.Bb00468.1	30298354	Pavir.Bb00468.1.p|PACid:30298354	0.62988	1.54743627605823	<.0001	2	AT2G18250.1	4-phosphopantetheine adenylyltransferase	Abiotic/biotic stress	Abiotic/biotic stress	277		Abiotic/biotic stress	277
RT1-SDT	4530	Pavir.Bb02338.2	30299762	Pavir.Bb02338.2.p|PACid:30299762	0.47326	1.38824288319935	<.0001	6	AT1G49670.1	ARP protein (REF)	Abiotic/biotic stress	Amino acid metabolism	278		Amino acid metabolism	278
RT1-SDT	5496	Pavir.Ba02016.1	30291506	Pavir.Ba02016.1.p|PACid:30291506	0.5338	1.44773745943988	0.0142	2	AT1G49670.2	ARP protein (REF)	Abiotic/biotic stress	Amino acid metabolism	479		Amino acid metabolism	479
RT1-SDT	4427	Pavir.J00132.1	30254394	Pavir.J00132.1.p|PACid:30254394	0.53571	1.44965540446808	<.0001	8	AT4G05420.1	damaged DNA binding protein 1A	Abiotic/biotic stress	Ammonia metabolism	480		Ammonia metabolism	480
RT1-SDT	6000	Pavir.J00582.1	30255742	Pavir.J00582.1.p|PACid:30255742	-0.9335	0.52358657082375	<.0001	5	AT2G26150.1	heat shock transcription factor A2	Abiotic/biotic stress	Ammonia metabolism	491		Ammonia metabolism	491
RT1-SDT	3382	Pavir.J12437.1	30200081	Pavir.J12437.1.p|PACid:30200081	0.43686	1.35365491318654	<.0001	4	AT1G01170.1	Protein of unknown function (DUF1138)	Abiotic/biotic stress	Carbohydrates metabolism	492		Carbohydrates metabolism	492
RT1-SDT	3812	Pavir.Da02382.1	30192014	Pavir.Da02382.1.p|PACid:30192014	0.2644	1.20113640704791	0.0877	3	AT1G01170.1	Protein of unknown function (DUF1138)	Abiotic/biotic stress	Cell division & Cell cycle	596		Cell division & Cell cycle	596
RT1-SDT	5375	Pavir.J22072.1	30218224	Pavir.J22072.1.p|PACid:30218224	0.5734	1.48802627373215	0.0035	2	AT1G02360.1	Chitinase family protein	Abiotic/biotic stress	Cell organization	597		Cell organization	597
RT1-SDT	5003	Pavir.Ia01681.1	30215702	Pavir.Ia01681.1.p|PACid:30215702	0.0587	1.04152682707335	0.5422	6	AT1G04430.1	S-adenosyl-L-methionine-dependent methyltransferases superfamily protein	Abiotic/biotic stress	Cell organization	703		Cell organization	703
RT1-SDT	1802	Pavir.Ab01492.1	30234021	Pavir.Ab01492.1.p|PACid:30234021	0.2931	1.22527025822381	0.0055	11	AT1G05260.1	Peroxidase superfamily protein	Abiotic/biotic stress	Cell wall synthesis / modification	704		Cell wall synthesis / modification	704
RT1-SDT	1320	Pavir.Ca01295.1	30206146	Pavir.Ca01295.1.p|PACid:30206146	0.1605	1.11767442739528	0.1372	6	AT1G05260.1	Peroxidase superfamily protein	Abiotic/biotic stress	Cell wall synthesis / modification	817		Cell wall synthesis / modification	817
RT1-SDT	1908	Pavir.Da00014.1	30193803	Pavir.Da00014.1.p|PACid:30193803	0.09961	1.07148377195974	0.2848	10	AT1G05260.1	Peroxidase superfamily protein	Abiotic/biotic stress	Development	818		Development	818
RT1-SDT	2866	Pavir.Da01522.1	30193790	Pavir.Da01522.1.p|PACid:30193790	0.5523	1.4664216592984	0.0024	3	AT1G05260.1	Peroxidase superfamily protein	Abiotic/biotic stress	Development	964		Development	964
RT1-SDT	1413	Pavir.Db00355.1	30260675	Pavir.Db00355.1.p|PACid:30260675	-0.59995	0.65977682111238	<.0001	14	AT1G05260.1	Peroxidase superfamily protein	Abiotic/biotic stress	DNA repair	965		DNA repair	965
RT1-SDT	2373	Pavir.Db00918.1	30260144	Pavir.Db00918.1.p|PACid:30260144	0.1952	1.1448828640638	0.117	3	AT1G05260.1	Peroxidase superfamily protein	Abiotic/biotic stress	DNA repair	983		DNA repair	983
RT1-SDT	7870	Pavir.Ia02466.1	30212038	Pavir.Ia02466.1.p|PACid:30212038	-1.0954	0.468006346815267	0.0003	2	AT1G05260.1	Peroxidase superfamily protein	Abiotic/biotic stress	DNA synthesis	984		DNA synthesis	984
RT1-SDT	3827	Pavir.Ib02451.1	30237204	Pavir.Ib02451.1.p|PACid:30237204	-1.3738	0.385873533487381	<.0001	4	AT1G05260.1	Peroxidase superfamily protein	Abiotic/biotic stress	DNA synthesis	1064		DNA synthesis	1064
RT1-SDT	1364	Pavir.J05455.1	30245217	Pavir.J05455.1.p|PACid:30245217	-0.2939	0.815694030981319	0.0661	4	AT1G05260.1	Peroxidase superfamily protein	Abiotic/biotic stress	Fermentation	1065		Fermentation	1065
RT1-SDT	625	Pavir.J37141.1	30259827	Pavir.J37141.1.p|PACid:30259827	0.86829	1.82549788843595	<.0001	11	AT1G05260.1	Peroxidase superfamily protein	Abiotic/biotic stress	Fermentation	1081		Fermentation	1081
RT1-SDT	5912	Pavir.Fb01910.1	30280026	Pavir.Fb01910.1.p|PACid:30280026	-0.3993	0.758226087610488	0.0252	4	AT1G05850.1	Chitinase family protein	Abiotic/biotic stress	Functional enzyme	1082		Functional enzyme	1082
RT1-SDT	3439	Pavir.J28940.1	30219908	Pavir.J28940.1.p|PACid:30219908	0.3282	1.2554460209935	0.0092	7	AT1G09090.2	respiratory burst oxidase homolog B	Abiotic/biotic stress	Functional enzyme	1472		Functional enzyme	1472
RT1-SDT	4520	Pavir.Ea00976.1	30226954	Pavir.Ea00976.1.p|PACid:30226954	0.17	1.12505848468881	0.2125	5	AT1G09560.1	germin-like protein 5	Abiotic/biotic stress	Glycolysis	1473		Glycolysis	1473
RT1-SDT	2260	Pavir.Ea01055.1	30230917	Pavir.Ea01055.1.p|PACid:30230917	0.47104	1.3861083162005	<.0001	20	AT1G09560.1	germin-like protein 5	Abiotic/biotic stress	Glycolysis	1543		Glycolysis	1543
RT1-SDT	4073	Pavir.Eb00788.1	30308756	Pavir.Eb00788.1.p|PACid:30308756	0.5511	1.46520243118503	0.0028	4	AT1G09560.1	germin-like protein 5	Abiotic/biotic stress	Glyoxylate cycle	1544		Glyoxylate cycle	1544
RT1-SDT	1536	Pavir.Ea03104.1	30230363	Pavir.Ea03104.1.p|PACid:30230363	0.7787	1.71558427804162	0.0736	2	AT1G11360.1	Adenine nucleotide alpha hydrolases-like superfamily protein	Abiotic/biotic stress	Glyoxylate cycle	1552		Glyoxylate cycle	1552
RT1-SDT	3834	Pavir.J34065.1	30207993	Pavir.J34065.1.p|PACid:30207993	-0.8145	0.5686055161286	0.0003	3	AT1G11360.1	Adenine nucleotide alpha hydrolases-like superfamily protein	Abiotic/biotic stress	Lipids metabolism	1553		Lipids metabolism	1553
RT1-SDT	3409	Pavir.J37634.1	30247346	Pavir.J37634.1.p|PACid:30247346	-1.0236	0.49188739825387	<.0001	7	AT1G11360.1	Adenine nucleotide alpha hydrolases-like superfamily protein	Abiotic/biotic stress	Lipids metabolism	1680		Lipids metabolism	1680
RT1-SDT	4509	Pavir.J31818.1	30190022	Pavir.J31818.1.p|PACid:30190022	-0.9134	0.530932367129418	0.0003	3	AT1G11360.1	Adenine nucleotide alpha hydrolases-like superfamily protein	Abiotic/biotic stress	Major CHO metabolism	1681		Major CHO metabolism	1681
RT1-SDT	5326	Pavir.J09930.1	30190780	Pavir.J09930.1.p|PACid:30190780	-0.7975	0.575345311616293	0.0281	2	AT1G11360.1	Adenine nucleotide alpha hydrolases-like superfamily protein	Abiotic/biotic stress	Major CHO metabolism	1717		Major CHO metabolism	1717
RT1-SDT	1325	Pavir.Eb03415.1	30311179	Pavir.Eb03415.1.p|PACid:30311179	-0.7275	0.603949572447935	0.0014	3	AT1G11360.1	Adenine nucleotide alpha hydrolases-like superfamily protein	Abiotic/biotic stress	Metal binding	1718		Metal binding	1718
RT1-SDT	1152	Pavir.J13939.1	30244820	Pavir.J13939.1.p|PACid:30244820	1.07912	2.11274697674859	<.0001	58	AT1G18970.1	germin-like protein 4	Abiotic/biotic stress	Metal binding	1734		Metal binding	1734
RT1-SDT	4082	Pavir.Ib01907.1	30237795	Pavir.Ib01907.1.p|PACid:30237795	0.58058	1.49545033676757	<.0001	9	AT1G19110.1	inter-alpha-trypsin inhibitor heavy chain-related	Abiotic/biotic stress	Minor CHO metabolism	1735		Minor CHO metabolism	1735
RT1-SDT	3925	Pavir.Da01414.1	30193093	Pavir.Da01414.1.p|PACid:30193093	-0.1123	0.925112036395268	0.5221	7	AT1G20030.2	Pathogenesis-related thaumatin superfamily protein	Abiotic/biotic stress	Minor CHO metabolism	1779		Minor CHO metabolism	1779
RT1-SDT	113	Pavir.Aa00887.1	30253439	Pavir.Aa00887.1.p|PACid:30253439	-0.33204	0.79441237400287	<.0001	159	AT1G20450.1	Dehydrin family protein	Abiotic/biotic stress	Mitochondrial electron transport / ATP synthesis	1780		Mitochondrial electron transport / ATP synthesis	1780
RT1-SDT	102	Pavir.J04551.1	30285341	Pavir.J04551.1.p|PACid:30285341	-0.48221	0.715880158850295	<.0001	178	AT1G20450.1	Dehydrin family protein	Abiotic/biotic stress	Mitochondrial electron transport / ATP synthesis	1843		Mitochondrial electron transport / ATP synthesis	1843
RT1-SDT	5429	Pavir.Cb01081.1	30268414	Pavir.Cb01081.1.p|PACid:30268414	0.22108	1.16560583125418	0.0388	3	AT1G20780.1	senescence-associated E3 ubiquitin ligase 1	Abiotic/biotic stress	Nucleotide metabolism	1844		Nucleotide metabolism	1844
RT1-SDT	7926	Pavir.Ba01678.1	30290473	Pavir.Ba01678.1.p|PACid:30290473	-0.5683	0.674411012760203	0.0039	2	AT1G21080.1	DNAJ heat shock N-terminal domain-containing protein	Abiotic/biotic stress	Nucleotide metabolism	1947		Nucleotide metabolism	1947
RT1-SDT	2282	Pavir.Fa00465.1	30188408	Pavir.Fa00465.1.p|PACid:30188408	0.17749	1.13091460813597	0.0381	5	AT1G21080.1	DNAJ heat shock N-terminal domain-containing protein	Abiotic/biotic stress	Pentose phosphate pathway	1948		Pentose phosphate pathway	1948
RT1-SDT	5445	Pavir.J04930.1	30272970	Pavir.J04930.1.p|PACid:30272970	-0.5721	0.67263697900247	0.0297	2	AT1G21610.2	wound-responsive family protein	Abiotic/biotic stress	Pentose phosphate pathway	1972		Pentose phosphate pathway	1972
RT1-SDT	6775	Pavir.Da01190.1	30191775	Pavir.Da01190.1.p|PACid:30191775	-0.05376	0.963422151093422	0.5893	3	AT1G24120.1	ARG1-like 1	Abiotic/biotic stress	Phyto-hormone metabolism	1973		Phyto-hormone metabolism	1973
RT1-SDT	2724	Pavir.Ba01840.1	30288441	Pavir.Ba01840.1.p|PACid:30288441	0.07236	1.05143524413073	0.539	4	AT1G26850.1	S-adenosyl-L-methionine-dependent methyltransferases superfamily protein	Abiotic/biotic stress	Phyto-hormone metabolism	2096		Phyto-hormone metabolism	2096
RT1-SDT	7042	Pavir.J35962.1	30296188	Pavir.J35962.1.p|PACid:30296188	1.0071	2.00986694938038	0.0007	2	AT1G30360.1	Early-responsive to dehydration stress protein (ERD4)	Abiotic/biotic stress	Protein degradation	2097		Protein degradation	2097
RT1-SDT	2610	Pavir.Ib03735.1	30237756	Pavir.Ib03735.1.p|PACid:30237756	0.04681	1.03297833758134	0.5751	11	AT1G33170.1	S-adenosyl-L-methionine-dependent methyltransferases superfamily protein	Abiotic/biotic stress	Protein degradation	2436		Protein degradation	2436
RT1-SDT	5419	Pavir.J33826.1	30315418	Pavir.J33826.1.p|PACid:30315418	0.473	1.38799271901559	0.0004	6	AT1G34130.1	staurosporin and temperature sensitive 3-like b	Abiotic/biotic stress	Protein modification	2437		Protein modification	2437
RT1-SDT	7633	Pavir.Hb00398.1	30265981	Pavir.Hb00398.1.p|PACid:30265981	-0.882	0.542614685940904	0.0123	2	AT1G50180.1	NB-ARC domain-containing disease resistance protein	Abiotic/biotic stress	Protein modification	2561		Protein modification	2561
RT1-SDT	3436	Pavir.Ab00731.1	30236320	Pavir.Ab00731.1.p|PACid:30236320	3.0026	8.01443046061298	<.0001	5	AT1G52560.1	HSP20-like chaperones superfamily protein	Abiotic/biotic stress	Protein synthesis	2562		Protein synthesis	2562
RT1-SDT	409	Pavir.Aa00282.1	30253178	Pavir.Aa00282.1.p|PACid:30253178	2.2363	4.71187086251558	<.0001	20	AT1G54050.1	HSP20-like chaperones superfamily protein	Abiotic/biotic stress	Protein synthesis	2951		Protein synthesis	2951
RT1-SDT	478	Pavir.J21349.1	30225604	Pavir.J21349.1.p|PACid:30225604	1.86022	3.63063022250011	<.0001	15	AT1G54050.1	HSP20-like chaperones superfamily protein	Abiotic/biotic stress	Protein targeting & vesicle tansport	2952		Protein targeting & vesicle tansport	2952
RT1-SDT	2937	Pavir.Ca00229.1	30204212	Pavir.Ca00229.1.p|PACid:30204212	0.4533	1.36916849407635	<.0001	4	AT1G65870.1	Disease resistance-responsive (dirigent-like protein) family protein	Abiotic/biotic stress	Protein targeting & vesicle tansport	3173		Protein targeting & vesicle tansport	3173
RT1-SDT	5288	Pavir.Ha00864.1	30316333	Pavir.Ha00864.1.p|PACid:30316333	1.3521	2.55283448052772	<.0001	3	AT1G65870.1	Disease resistance-responsive (dirigent-like protein) family protein	Abiotic/biotic stress	Redox balance	3174		Redox balance	3174
RT1-SDT	4395	Pavir.J15815.1	30202491	Pavir.J15815.1.p|PACid:30202491	0.58365	1.4986359862925	<.0001	10	AT1G65870.1	Disease resistance-responsive (dirigent-like protein) family protein	Abiotic/biotic stress	Redox balance	3296		Redox balance	3296
RT1-SDT	6674	Pavir.Hb01571.1	30264315	Pavir.Hb01571.1.p|PACid:30264315	2.1132	4.32649879245074	<.0001	7	AT1G66100.1	Plant thionin	Abiotic/biotic stress	Regulation of transcription	3297		Regulation of transcription	3297
RT1-SDT	4156	Pavir.Ib02577.1	30239592	Pavir.Ib02577.1.p|PACid:30239592	1.1316	2.1910159700563	<.0001	13	AT1G66100.1	Plant thionin	Abiotic/biotic stress	Regulation of transcription	3657		Regulation of transcription	3657
RT1-SDT	3879	Pavir.Fb01262.1	30280025	Pavir.Fb01262.1.p|PACid:30280025	1.225	2.33755449712249	<.0001	3	AT1G68300.1	Adenine nucleotide alpha hydrolases-like superfamily protein	Abiotic/biotic stress	RNA processing	3658		RNA processing	3658
RT1-SDT	130	Pavir.Cb00592.1	30270091	Pavir.Cb00592.1.p|PACid:30270091	0.57767	1.49243696635395	<.0001	31	AT1G70840.1	MLP-like protein 31	Abiotic/biotic stress	RNA processing	3778		RNA processing	3778
RT1-SDT	936	Pavir.J14856.1	30285131	Pavir.J14856.1.p|PACid:30285131	0.57048	1.48501756960103	<.0001	24	AT1G70840.1	MLP-like protein 31	Abiotic/biotic stress	RNA synthesis	3779		RNA synthesis	3779
RT1-SDT	244	Pavir.J27771.1	30219066	Pavir.J27771.1.p|PACid:30219066	0.1799	1.13280536249012	0.4354	4	AT1G70840.1	MLP-like protein 31	Abiotic/biotic stress	RNA synthesis	3806		RNA synthesis	3806
RT1-SDT	4603	Pavir.Db00301.1	30261633	Pavir.Db00301.1.p|PACid:30261633	-0.4493	0.732398123561523	0.09	3	AT1G73620.1	Pathogenesis-related thaumatin superfamily protein	Abiotic/biotic stress	S-assimilation	3807		S-assimilation	3807
RT1-SDT	3853	Pavir.J25074.1	30216220	Pavir.J25074.1.p|PACid:30216220	-0.1943	0.873996858975329	0.2478	5	AT1G73620.1	Pathogenesis-related thaumatin superfamily protein	Abiotic/biotic stress	S-assimilation	3815		S-assimilation	3815
RT1-SDT	954	Pavir.J02395.1	30315736	Pavir.J02395.1.p|PACid:30315736	1.3463	2.54259204079464	0.0003	3	AT1G74310.1	heat shock protein 101	Abiotic/biotic stress	Secondary metabolism	3816		Secondary metabolism	3816
RT1-SDT	1168	Pavir.J37362.1	30294839	Pavir.J37362.1.p|PACid:30294839	1.4955	2.81961854628963	<.0001	4	AT1G74310.1	heat shock protein 101	Abiotic/biotic stress	Secondary metabolism	3966		Secondary metabolism	3966
RT1-SDT	5830	Pavir.Eb03026.1	30309417	Pavir.Eb03026.1.p|PACid:30309417	0.09696	1.0695174341544	0.3468	3	AT1G78780.2	pathogenesis-related family protein	Abiotic/biotic stress	Signaling regulation	3967		Signaling regulation	3967
RT1-SDT	356	Pavir.Ca01047.1	30205606	Pavir.Ca01047.1.p|PACid:30205606	0.05019	1.03540127510276	0.5438	14	AT1G79920.1	Heat shock protein 70 (Hsp 70) family protein	Abiotic/biotic stress	Signaling regulation	4199		Signaling regulation	4199
RT1-SDT	408	Pavir.Ib02877.1	30238824	Pavir.Ib02877.1.p|PACid:30238824	-0.14872	0.902050432434259	0.0744	18	AT1G79920.1	Heat shock protein 70 (Hsp 70) family protein	Abiotic/biotic stress	TCA cycle	4200		TCA cycle	4200
RT1-SDT	336	Pavir.J02507.1	30248656	Pavir.J02507.1.p|PACid:30248656	0.341	1.26663425372322	0.0467	4	AT1G79920.1	Heat shock protein 70 (Hsp 70) family protein	Abiotic/biotic stress	TCA cycle	4266		TCA cycle	4266
RT1-SDT	242	Pavir.J04576.1	30281447	Pavir.J04576.1.p|PACid:30281447	-0.08034	0.945834715550966	0.3896	12	AT1G79920.1	Heat shock protein 70 (Hsp 70) family protein	Abiotic/biotic stress	Transport	4267		Transport	4267
RT1-SDT	4271	Pavir.J03165.1	30285345	Pavir.J03165.1.p|PACid:30285345	0.05251	1.03706764489054	0.7204	2	AT1G80030.1	Molecular chaperone Hsp40/DnaJ family protein	Abiotic/biotic stress	Transport	4386		Transport	4386
RT1-SDT	1910	Pavir.J06096.1	30189892	Pavir.J06096.1.p|PACid:30189892	0.1281	1.09285348730704	0.3355	11	AT2G01710.1	Chaperone DnaJ-domain superfamily protein	Abiotic/biotic stress	Unclassified	4397		Unclassified	4397
RT1-SDT	4544	Pavir.Ga01235.1	30303800	Pavir.Ga01235.1.p|PACid:30303800	-0.1194	0.920570425500526	0.4005	3	AT2G02120.1	Scorpion toxin-like knottin superfamily protein	Abiotic/biotic stress	Unclassified	5645		Unclassified	5645
RT1-SDT	4475	Pavir.J20852.1	30208603	Pavir.J20852.1.p|PACid:30208603	0.2645	1.20121966636483	0.1099	3	AT2G02120.1	Scorpion toxin-like knottin superfamily protein	Abiotic/biotic stress
RT1-SDT	723	Pavir.Fa00597.1	30188120	Pavir.Fa00597.1.p|PACid:30188120	-0.5642	0.676330349730929	0.0001	12	AT2G04030.1	Chaperone protein htpG family protein	Abiotic/biotic stress
RT1-SDT	4134	Pavir.J38392.1	30207790	Pavir.J38392.1.p|PACid:30207790	2.9662	7.81475151120422	<.0001	4	AT2G14610.1	pathogenesis-related gene 1	Abiotic/biotic stress
RT1-SDT	4764	Pavir.Ib03654.1	30243014	Pavir.Ib03654.1.p|PACid:30243014	1.11	2.15845647300885	0.0003	3	AT2G15220.1	Plant basic secretory protein (BSP) family protein	Abiotic/biotic stress
RT1-SDT	2614	Pavir.Aa02396.1	30249552	Pavir.Aa02396.1.p|PACid:30249552	-0.15386	0.898842346584384	0.0047	24	AT2G20560.1	DNAJ heat shock family protein	Abiotic/biotic stress
RT1-SDT	2101	Pavir.Ea00013.1	30229906	Pavir.Ea00013.1.p|PACid:30229906	0.3626	1.28574095092096	0.0078	3	AT2G20560.1	DNAJ heat shock family protein	Abiotic/biotic stress
RT1-SDT	2031	Pavir.Eb00064.1	30313172	Pavir.Eb00064.1.p|PACid:30313172	0.1628	1.11945768810875	0.195	4	AT2G20560.1	DNAJ heat shock family protein	Abiotic/biotic stress
RT1-SDT	762	Pavir.J33423.1	30208153	Pavir.J33423.1.p|PACid:30208153	0.26417	1.2009449325189	<.0001	32	AT2G20560.1	DNAJ heat shock family protein	Abiotic/biotic stress
RT1-SDT	3679	Pavir.Eb02336.1	30308702	Pavir.Eb02336.1.p|PACid:30308702	1.7868	3.45048700594521	<.0001	4	AT2G21100.1	Disease resistance-responsive (dirigent-like protein) family protein	Abiotic/biotic stress
RT1-SDT	7263	Pavir.Aa00760.1	30249034	Pavir.Aa00760.1.p|PACid:30249034	0.4792	1.39397047063364	0.0113	2	AT2G21620.1	Adenine nucleotide alpha hydrolases-like superfamily protein	Abiotic/biotic stress
RT1-SDT	1721	Pavir.Fa01957.1	30187335	Pavir.Fa01957.1.p|PACid:30187335	0.01571	1.01094884688624	0.9367	3	AT2G22360.1	DNAJ heat shock family protein	Abiotic/biotic stress
RT1-SDT	7135	Pavir.Fa00419.1	30186028	Pavir.Fa00419.1.p|PACid:30186028	-0.6741	0.626723067582027	0.1007	2	AT2G24550.1	N	Abiotic/biotic stress
RT1-SDT	6355	Pavir.Ba01645.1	30292501	Pavir.Ba01645.1.p|PACid:30292501	-0.7267	0.604284566073981	0.1192	2	AT2G24550.1	N	Abiotic/biotic stress
RT1-SDT	3334	Pavir.Ab00822.1	30234325	Pavir.Ab00822.1.p|PACid:30234325	-0.5535	0.681365119560258	<.0001	9	AT2G26040.1	PYR1-like 2	Abiotic/biotic stress
RT1-SDT	5878	Pavir.Da00781.1	30191907	Pavir.Da00781.1.p|PACid:30191907	-0.6684	0.629204110143975	0.0006	4	AT2G26040.1	PYR1-like 2	Abiotic/biotic stress
RT1-SDT	4354	Pavir.Ia03513.1	30211414	Pavir.Ia03513.1.p|PACid:30211414	0.4908	1.40522388130894	0.0001	7	AT2G26890.1	DNAJ heat shock N-terminal domain-containing protein	Abiotic/biotic stress
RT1-SDT	4640	Pavir.Cb00512.1	30268195	Pavir.Cb00512.1.p|PACid:30268195	0.6342	1.55207685717591	<.0001	5	AT2G28790.1	Pathogenesis-related thaumatin superfamily protein	Abiotic/biotic stress
RT1-SDT	5738	Pavir.Cb00575.1	30268257	Pavir.Cb00575.1.p|PACid:30268257	0.7701	1.70538798792677	<.0001	4	AT2G28790.1	Pathogenesis-related thaumatin superfamily protein	Abiotic/biotic stress
RT1-SDT	1909	Pavir.J31129.1	30225767	Pavir.J31129.1.p|PACid:30225767	1.1284	2.18616152686128	<.0001	13	AT2G28790.1	Pathogenesis-related thaumatin superfamily protein	Abiotic/biotic stress
RT1-SDT	1181	Pavir.J38942.1	30276533	Pavir.J38942.1.p|PACid:30276533	1.02362	2.03301378850039	<.0001	39	AT2G32120.1	heat-shock protein 70T-2	Abiotic/biotic stress
RT1-SDT	5993	Pavir.J05128.1	30287474	Pavir.J05128.1.p|PACid:30287474	0.2709	1.20656028443628	0.0316	5	AT2G34700.1	Pollen Ole e 1 allergen and extensin family protein	Abiotic/biotic stress
RT1-SDT	783	Pavir.Ia03032.1	30213777	Pavir.Ia03032.1.p|PACid:30213777	0.5288	1.44272866833597	<.0001	39	AT2G36800.1	don-glucosyltransferase 1	Abiotic/biotic stress
RT1-SDT	3297	Pavir.J26521.1	30274703	Pavir.J26521.1.p|PACid:30274703	0.5049	1.41902499347409	<.0001	5	AT2G36800.1	don-glucosyltransferase 1	Abiotic/biotic stress
RT1-SDT	4889	Pavir.Ea00341.1	30226369	Pavir.Ea00341.1.p|PACid:30226369	0.2321	1.17454338153549	0.1453	3	AT2G36800.1	don-glucosyltransferase 1	Abiotic/biotic stress
RT1-SDT	1501	Pavir.Ca00608.1	30204384	Pavir.Ca00608.1.p|PACid:30204384	1.73456	3.32777986192179	<.0001	24	AT2G38870.1	Serine protease inhibitor, potato inhibitor I-type family protein	Abiotic/biotic stress
RT1-SDT	979	Pavir.Ca00609.1	30204579	Pavir.Ca00609.1.p|PACid:30204579	1.57989	2.98947055284068	<.0001	17	AT2G38870.1	Serine protease inhibitor, potato inhibitor I-type family protein	Abiotic/biotic stress
RT1-SDT	1436	Pavir.J00406.1	30195439	Pavir.J00406.1.p|PACid:30195439	1.3097	2.47889987354202	<.0001	11	AT2G38870.1	Serine protease inhibitor, potato inhibitor I-type family protein	Abiotic/biotic stress
RT1-SDT	2232	Pavir.Ib01400.1	30239621	Pavir.Ib01400.1.p|PACid:30239621	1.3205	2.49752652456197	<.0001	4	AT2G40330.1	PYR1-like 6	Abiotic/biotic stress
RT1-SDT	3200	Pavir.Bb03589.1	30299370	Pavir.Bb03589.1.p|PACid:30299370	-0.4809	0.716530489574157	<.0001	12	AT2G41430.1	dehydration-induced protein (ERD15)	Abiotic/biotic stress
RT1-SDT	5795	Pavir.Ca01575.1	30204737	Pavir.Ca01575.1.p|PACid:30204737	0.1401	1.10198149676617	0.5172	4	AT2G41430.1	dehydration-induced protein (ERD15)	Abiotic/biotic stress
RT1-SDT	6228	Pavir.Ga02741.1	30304197	Pavir.Ga02741.1.p|PACid:30304197	-1.0175	0.493971598570258	0.0014	4	AT2G43610.1	Chitinase family protein	Abiotic/biotic stress
RT1-SDT	5050	Pavir.Ca02660.1	30206509	Pavir.Ca02660.1.p|PACid:30206509	1.0978	2.14028067038376	0.0015	2	AT2G47710.1	Adenine nucleotide alpha hydrolases-like superfamily protein	Abiotic/biotic stress
RT1-SDT	2754	Pavir.Cb00604.1	30269483	Pavir.Cb00604.1.p|PACid:30269483	0.99692	1.9957347678955	<.0001	8	AT2G47710.1	Adenine nucleotide alpha hydrolases-like superfamily protein	Abiotic/biotic stress
RT1-SDT	5617	Pavir.J34849.1	30255001	Pavir.J34849.1.p|PACid:30255001	2.2484	4.75155589270669	<.0001	3	AT3G04720.1	pathogenesis-related 4	Abiotic/biotic stress
RT1-SDT	5852	Pavir.J36772.1	30203019	Pavir.J36772.1.p|PACid:30203019	2.699	6.49351664781823	<.0001	8	AT3G04720.1	pathogenesis-related 4	Abiotic/biotic stress
RT1-SDT	6242	Pavir.J31186.1	30216617	Pavir.J31186.1.p|PACid:30216617	1.5316	2.89106290511903	0.0002	3	AT3G04720.1	pathogenesis-related 4	Abiotic/biotic stress
RT1-SDT	4567	Pavir.J03411.1	30243184	Pavir.J03411.1.p|PACid:30243184	0.6856	1.60837074499952	<.0001	7	AT3G07230.1	wound-responsive protein-related	Abiotic/biotic stress
RT1-SDT	426	Pavir.Ca02374.1	30206832	Pavir.Ca02374.1.p|PACid:30206832	-0.4957	0.709217480136265	<.0001	31	AT3G07770.1	HEAT SHOCK PROTEIN 89.1	Abiotic/biotic stress
RT1-SDT	703	Pavir.J07429.1	30275692	Pavir.J07429.1.p|PACid:30275692	-0.407	0.754190038343289	0.0695	3	AT3G07770.1	HEAT SHOCK PROTEIN 89.1	Abiotic/biotic stress
RT1-SDT	4087	Pavir.J34611.1	30277524	Pavir.J34611.1.p|PACid:30277524	0.0303	1.02122446128627	0.7588	8	AT3G08910.1	DNAJ heat shock family protein	Abiotic/biotic stress
RT1-SDT	5809	Pavir.Ia03588.1	30211814	Pavir.Ia03588.1.p|PACid:30211814	0.7585	1.69173078237816	<.0001	3	AT3G08970.1	DNAJ heat shock N-terminal domain-containing protein	Abiotic/biotic stress
RT1-SDT	5141	Pavir.Ib02444.1	30240674	Pavir.Ib02444.1.p|PACid:30240674	0.8258	1.77251765823326	0.0574	2	AT3G09925.1	Pollen Ole e 1 allergen and extensin family protein	Abiotic/biotic stress
RT1-SDT	2099	Pavir.Aa01968.1	30252900	Pavir.Aa01968.1.p|PACid:30252900	0.35204	1.27636415666703	<.0001	20	AT3G10080.1	RmlC-like cupins superfamily protein	Abiotic/biotic stress
RT1-SDT	6813	Pavir.J15194.1	30216067	Pavir.J15194.1.p|PACid:30216067	1.6525	3.14377942881103	<.0001	2	AT3G10680.1	HSP20-like chaperones superfamily protein	Abiotic/biotic stress
RT1-SDT	2486	Pavir.J04721.1	30236724	Pavir.J04721.1.p|PACid:30236724	-0.53759	0.688920780007632	<.0001	9	AT3G12170.1	Chaperone DnaJ-domain superfamily protein	Abiotic/biotic stress
RT1-SDT	2710	Pavir.Ia04457.1	30209221	Pavir.Ia04457.1.p|PACid:30209221	2.0726	4.20644068212118	<.0001	4	AT3G12500.1	basic chitinase	Abiotic/biotic stress
RT1-SDT	2125	Pavir.Ib00193.1	30238328	Pavir.Ib00193.1.p|PACid:30238328	2.9433	7.69168670210978	<.0001	12	AT3G12500.1	basic chitinase	Abiotic/biotic stress
RT1-SDT	2008	Pavir.J01684.1	30190681	Pavir.J01684.1.p|PACid:30190681	1.3084	2.4766671644348	<.0001	16	AT3G12500.1	basic chitinase	Abiotic/biotic stress
RT1-SDT	3143	Pavir.J04987.1	30196621	Pavir.J04987.1.p|PACid:30196621	1.0184	2.02567117215368	<.0001	7	AT3G12500.1	basic chitinase	Abiotic/biotic stress
RT1-SDT	2335	Pavir.J08192.1	30281565	Pavir.J08192.1.p|PACid:30281565	0.9745	1.96496007579977	<.0001	10	AT3G12500.1	basic chitinase	Abiotic/biotic stress
RT1-SDT	2450	Pavir.J08876.1	30275693	Pavir.J08876.1.p|PACid:30275693	1.7734	3.41858666565697	<.0001	17	AT3G12500.1	basic chitinase	Abiotic/biotic stress
RT1-SDT	972	Pavir.J34564.1	30263851	Pavir.J34564.1.p|PACid:30263851	2.7062	6.52600458034124	<.0001	12	AT3G12500.1	basic chitinase	Abiotic/biotic stress
RT1-SDT	18	Pavir.Cb00504.1	30269945	Pavir.Cb00504.1.p|PACid:30269945	-0.38209	0.767325178271774	<.0001	80	AT3G12580.1	heat shock protein 70	Abiotic/biotic stress
RT1-SDT	25	Pavir.Eb03667.1	30309961	Pavir.Eb03667.1.p|PACid:30309961	0.62227	1.53929527191362	<.0001	6	AT3G12580.1	heat shock protein 70	Abiotic/biotic stress
RT1-SDT	5957	Pavir.Ba00988.1	30290042	Pavir.Ba00988.1.p|PACid:30290042	-0.1382	0.908652141782786	0.4661	2	AT3G14470.1	NB-ARC domain-containing disease resistance protein	Abiotic/biotic stress
RT1-SDT	2397	Pavir.Ca01135.1	30203850	Pavir.Ca01135.1.p|PACid:30203850	0.62404	1.54118494684447	<.0001	13	AT3G17020.1	Adenine nucleotide alpha hydrolases-like superfamily protein	Abiotic/biotic stress
RT1-SDT	3290	Pavir.J36682.1	30243106	Pavir.J36682.1.p|PACid:30243106	0.6898	1.61305988536122	<.0001	6	AT3G17020.1	Adenine nucleotide alpha hydrolases-like superfamily protein	Abiotic/biotic stress
RT1-SDT	3065	Pavir.J12160.1	30314676	Pavir.J12160.1.p|PACid:30314676	0.90593	1.87375197652623	<.0001	12	AT3G17020.1	Adenine nucleotide alpha hydrolases-like superfamily protein	Abiotic/biotic stress
RT1-SDT	5988	Pavir.Ea01530.1	30226243	Pavir.Ea01530.1.p|PACid:30226243	-0.11781	0.921585549147659	0.1887	5	AT3G17210.1	heat stable protein 1	Abiotic/biotic stress
RT1-SDT	6512	Pavir.J06634.1	30274962	Pavir.J06634.1.p|PACid:30274962	0.31679	1.24555609809692	0.0021	4	AT3G18030.1	HAL3-like protein A	Abiotic/biotic stress
RT1-SDT	3341	Pavir.Eb01083.1	30314312	Pavir.Eb01083.1.p|PACid:30314312	0.55112	1.4652227433445	<.0001	10	AT3G18165.1	modifier of snc1,4	Abiotic/biotic stress
RT1-SDT	4732	Pavir.Ib04311.1	30239723	Pavir.Ib04311.1.p|PACid:30239723	-0.04492	0.969343567265627	0.7133	6	AT3G25070.1	RPM1 interacting protein 4	Abiotic/biotic stress
RT1-SDT	4686	Pavir.Fa00392.1	30185609	Pavir.Fa00392.1.p|PACid:30185609	-0.7422	0.597827016221089	0.001	2	AT3G25070.1	RPM1 interacting protein 4	Abiotic/biotic stress
RT1-SDT	1257	Pavir.Ab02600.1	30236008	Pavir.Ab02600.1.p|PACid:30236008	-0.5414	0.687103815744831	0.0017	6	AT3G44110.1	DNAJ homologue 3	Abiotic/biotic stress
RT1-SDT	643	Pavir.Ia01140.1	30211245	Pavir.Ia01140.1.p|PACid:30211245	-0.01198	0.991730478946705	0.9143	8	AT3G44110.1	DNAJ homologue 3	Abiotic/biotic stress
RT1-SDT	600	Pavir.Ib04128.1	30241546	Pavir.Ib04128.1.p|PACid:30241546	-0.4612	0.726381819903421	0.0011	7	AT3G44110.1	DNAJ homologue 3	Abiotic/biotic stress
RT1-SDT	362	Pavir.J00426.1	30202062	Pavir.J00426.1.p|PACid:30202062	-0.26047	0.834815909485033	0.0084	15	AT3G44110.1	DNAJ homologue 3	Abiotic/biotic stress
RT1-SDT	368	Pavir.J13853.1	30246889	Pavir.J13853.1.p|PACid:30246889	-0.2206	0.858208443350569	0.0348	15	AT3G44110.1	DNAJ homologue 3	Abiotic/biotic stress
RT1-SDT	1170	Pavir.Aa00831.1	30251197	Pavir.Aa00831.1.p|PACid:30251197	-0.7894	0.578584668521706	<.0001	7	AT3G44110.1	DNAJ homologue 3	Abiotic/biotic stress
RT1-SDT	635	Pavir.Ib01136.1	30237887	Pavir.Ib01136.1.p|PACid:30237887	0.47261	1.3876175572626	<.0001	43	AT3G46230.1	heat shock protein 17.4	Abiotic/biotic stress
RT1-SDT	1812	Pavir.Eb03620.1	30313225	Pavir.Eb03620.1.p|PACid:30313225	-0.3072	0.808208819506172	0.0666	4	AT3G51780.1	BCL-2-associated athanogene 4	Abiotic/biotic stress
RT1-SDT	1603	Pavir.J00438.1	30201207	Pavir.J00438.1.p|PACid:30201207	0.66889	1.5898492773267	<.0001	7	AT3G53990.1	Adenine nucleotide alpha hydrolases-like superfamily protein	Abiotic/biotic stress
RT1-SDT	1510	Pavir.J08010.1	30306634	Pavir.J08010.1.p|PACid:30306634	0.33846	1.26440618719595	<.0001	17	AT3G53990.1	Adenine nucleotide alpha hydrolases-like superfamily protein	Abiotic/biotic stress
RT1-SDT	2211	Pavir.J09458.1	30231778	Pavir.J09458.1.p|PACid:30231778	2.9654	7.81041929407945	<.0001	4	AT3G54420.1	homolog of carrot EP3-3 chitinase	Abiotic/biotic stress
RT1-SDT	3569	Pavir.Gb01434.1	30221789	Pavir.Gb01434.1.p|PACid:30221789	1.892	3.71149390588513	<.0001	6	AT3G54420.1	homolog of carrot EP3-3 chitinase	Abiotic/biotic stress
RT1-SDT	2854	Pavir.J17463.1	30282282	Pavir.J17463.1.p|PACid:30282282	3.6669	12.7012624799662	<.0001	3	AT3G54420.1	homolog of carrot EP3-3 chitinase	Abiotic/biotic stress
RT1-SDT	2285	Pavir.Ea01912.1	30231086	Pavir.Ea01912.1.p|PACid:30231086	0.3989	1.31850221971529	0.0021	3	AT3G57340.1	Heat shock protein DnaJ, N-terminal with domain of unknown function (DUF1977)	Abiotic/biotic stress
RT1-SDT	2421	Pavir.Eb01397.1	30309737	Pavir.Eb01397.1.p|PACid:30309737	0.1343	1.09756014506723	0.5178	2	AT3G57340.1	Heat shock protein DnaJ, N-terminal with domain of unknown function (DUF1977)	Abiotic/biotic stress
RT1-SDT	5122	Pavir.Ea03320.1	30226855	Pavir.Ea03320.1.p|PACid:30226855	-0.4543	0.729864218548638	0.0231	3	AT3G58090.1	Disease resistance-responsive (dirigent-like protein) family protein	Abiotic/biotic stress
RT1-SDT	3867	Pavir.Ca02141.1	30203948	Pavir.Ca02141.1.p|PACid:30203948	0.5908	1.50608166490917	<.0001	5	AT3G62020.1	germin-like protein 10	Abiotic/biotic stress
RT1-SDT	559	Pavir.Ca01139.1	30203403	Pavir.Ca01139.1.p|PACid:30203403	-0.355	0.781869643128594	<.0001	53	AT3G62600.1	DNAJ heat shock family protein	Abiotic/biotic stress
RT1-SDT	1787	Pavir.Ab02606.1	30234359	Pavir.Ab02606.1.p|PACid:30234359	-0.4422	0.736011391167255	0.0116	4	AT4G00750.1	S-adenosyl-L-methionine-dependent methyltransferases superfamily protein	Abiotic/biotic stress
RT1-SDT	5289	Pavir.Ia00724.1	30212317	Pavir.Ia00724.1.p|PACid:30212317	0.44876	1.36486664616616	0.0001	3	AT4G07990.1	Chaperone DnaJ-domain superfamily protein	Abiotic/biotic stress
RT1-SDT	6875	Pavir.Ia02496.1	30210337	Pavir.Ia02496.1.p|PACid:30210337	-0.741	0.598324481615357	0.011	2	AT4G08685.1	Pollen Ole e 1 allergen and extensin family protein	Abiotic/biotic stress
RT1-SDT	7293	Pavir.Ha01274.1	30318020	Pavir.Ha01274.1.p|PACid:30318020	0.18613	1.13770774111244	0.0797	2	AT4G09350.1	Chaperone DnaJ-domain superfamily protein	Abiotic/biotic stress
RT1-SDT	606	Pavir.Ga01718.1	30303744	Pavir.Ga01718.1.p|PACid:30303744	0.51136	1.42539325240828	<.0001	36	AT4G10250.1	HSP20-like chaperones superfamily protein	Abiotic/biotic stress
RT1-SDT	2341	Pavir.Hb01472.1	30265909	Pavir.Hb01472.1.p|PACid:30265909	0.27202	1.20749733083788	0.0006	12	AT4G10250.1	HSP20-like chaperones superfamily protein	Abiotic/biotic stress
RT1-SDT	812	Pavir.J07818.1	30243543	Pavir.J07818.1.p|PACid:30243543	0.57407	1.48871748643717	<.0001	26	AT4G10250.1	HSP20-like chaperones superfamily protein	Abiotic/biotic stress
RT1-SDT	2379	Pavir.Bb03197.1	30299608	Pavir.Bb03197.1.p|PACid:30299608	2.0992	4.28471723953043	<.0001	12	AT4G11650.1	osmotin 34	Abiotic/biotic stress
RT1-SDT	5633	Pavir.Cb00109.1	30267809	Pavir.Cb00109.1.p|PACid:30267809	1.1973	2.29310115886336	<.0001	4	AT4G11650.1	osmotin 34	Abiotic/biotic stress
RT1-SDT	1459	Pavir.Eb03806.1	30312699	Pavir.Eb03806.1.p|PACid:30312699	2.6624	6.33085345146004	<.0001	12	AT4G11650.1	osmotin 34	Abiotic/biotic stress
RT1-SDT	3064	Pavir.Ea03024.1	30231561	Pavir.Ea03024.1.p|PACid:30231561	2.2242	4.67251728199207	0.0005	2	AT4G11650.1	osmotin 34	Abiotic/biotic stress
RT1-SDT	7493	Pavir.Ia03227.1	30210722	Pavir.Ia03227.1.p|PACid:30210722	-0.7311	0.602444397786552	0.0066	2	AT4G13580.1	Disease resistance-responsive (dirigent-like protein) family protein	Abiotic/biotic stress
RT1-SDT	833	Pavir.Aa00616.1	30252567	Pavir.Aa00616.1.p|PACid:30252567	-0.03884	0.973437325826072	0.8253	6	AT4G16660.1	heat shock protein 70 (Hsp 70) family protein	Abiotic/biotic stress
RT1-SDT	820	Pavir.Ab03105.1	30235951	Pavir.Ab03105.1.p|PACid:30235951	-0.6496	0.637457029777611	0.0012	5	AT4G16660.1	heat shock protein 70 (Hsp 70) family protein	Abiotic/biotic stress
RT1-SDT	4705	Pavir.Ia02673.1	30210555	Pavir.Ia02673.1.p|PACid:30210555	-0.04676	0.968108063428638	0.6092	3	AT4G19120.1	S-adenosyl-L-methionine-dependent methyltransferases superfamily protein	Abiotic/biotic stress
RT1-SDT	5568	Pavir.Ea00102.1	30230749	Pavir.Ea00102.1.p|PACid:30230749	0.214	1.15989965450543	0.2821	3	AT4G23630.1	VIRB2-interacting protein 1	Abiotic/biotic stress
RT1-SDT	4057	Pavir.Eb03120.1	30313090	Pavir.Eb03120.1.p|PACid:30313090	1.08329	2.11886254480683	<.0001	5	AT4G23630.1	VIRB2-interacting protein 1	Abiotic/biotic stress
RT1-SDT	1202	Pavir.Db00008.1	30261825	Pavir.Db00008.1.p|PACid:30261825	0.2051	1.15276624769712	0.137	3	AT4G24190.1	Chaperone protein htpG family protein	Abiotic/biotic stress
RT1-SDT	809	Pavir.J30437.1	30285728	Pavir.J30437.1.p|PACid:30285728	0.01397	1.00973030062705	0.8453	17	AT4G24190.2	Chaperone protein htpG family protein	Abiotic/biotic stress
RT1-SDT	234	Pavir.Ca00431.1	30205375	Pavir.Ca00431.1.p|PACid:30205375	-0.64076	0.641374988650496	<.0001	67	AT4G24280.1	chloroplast heat shock protein 70-1	Abiotic/biotic stress
RT1-SDT	505	Pavir.J01685.1	30190683	Pavir.J01685.1.p|PACid:30190683	0.1149	1.08289998201752	0.0539	19	AT4G24280.1	chloroplast heat shock protein 70-1	Abiotic/biotic stress
RT1-SDT	1937	Pavir.J11083.1	30254469	Pavir.J11083.1.p|PACid:30254469	0.00269	1.00186630529963	0.9864	2	AT4G24280.1	chloroplast heat shock protein 70-1	Abiotic/biotic stress
RT1-SDT	2811	Pavir.Ba00689.1	30289496	Pavir.Ba00689.1.p|PACid:30289496	-0.8175	0.567424362692911	<.0001	12	AT4G27320.1	Adenine nucleotide alpha hydrolases-like superfamily protein	Abiotic/biotic stress
RT1-SDT	6215	Pavir.Ia02656.1	30213207	Pavir.Ia02656.1.p|PACid:30213207	1.4171	2.67048170386314	0.0002	2	AT4G27670.1	heat shock protein 21	Abiotic/biotic stress
RT1-SDT	690	Pavir.Ib01026.1	30238031	Pavir.Ib01026.1.p|PACid:30238031	1.4996	2.82764302693548	<.0001	11	AT4G27670.1	heat shock protein 21	Abiotic/biotic stress
RT1-SDT	5065	Pavir.Ib02662.1	30241616	Pavir.Ib02662.1.p|PACid:30241616	1.1106	2.15935433651256	<.0001	5	AT4G27670.1	heat shock protein 21	Abiotic/biotic stress
RT1-SDT	4830	Pavir.Ib02744.1	30237056	Pavir.Ib02744.1.p|PACid:30237056	0.7617	1.69548732592877	<.0001	6	AT4G27670.1	heat shock protein 21	Abiotic/biotic stress
RT1-SDT	694	Pavir.J08073.1	30308630	Pavir.J08073.1.p|PACid:30308630	1.2536	2.38435656899379	<.0001	9	AT4G27670.1	heat shock protein 21	Abiotic/biotic stress
RT1-SDT	1656	Pavir.Fa01476.1	30186955	Pavir.Fa01476.1.p|PACid:30186955	0.009962	1.0069290276068	0.9604	3	AT4G27670.1	heat shock protein 21	Abiotic/biotic stress
RT1-SDT	1864	Pavir.Fb01731.1	30279822	Pavir.Fb01731.1.p|PACid:30279822	0.5322	1.44613275721909	0.2889	2	AT4G27670.1	heat shock protein 21	Abiotic/biotic stress
RT1-SDT	710	Pavir.Aa03480.1	30252751	Pavir.Aa03480.1.p|PACid:30252751	-0.13889	0.908217663218009	0.1423	17	AT4G36020.1	cold shock domain protein 1	Abiotic/biotic stress
RT1-SDT	29	Pavir.Ab00211.1	30232550	Pavir.Ab00211.1.p|PACid:30232550	-0.21467	0.861743251088561	0.0096	10	AT4G36020.1	cold shock domain protein 1	Abiotic/biotic stress
RT1-SDT	97	Pavir.J33349.1	30287410	Pavir.J33349.1.p|PACid:30287410	-0.25696	0.836849444755068	<.0001	119	AT4G36020.1	cold shock domain protein 1	Abiotic/biotic stress
RT1-SDT	6248	Pavir.J04718.1	30314685	Pavir.J04718.1.p|PACid:30314685	0.02327	1.01626031805057	0.888	3	AT4G38660.1	Pathogenesis-related thaumatin superfamily protein	Abiotic/biotic stress
RT1-SDT	2121	Pavir.Db02085.1	30262143	Pavir.Db02085.1.p|PACid:30262143	-0.36	0.7791645796605	0.0112	9	AT4G38680.1	glycine rich protein 2	Abiotic/biotic stress
RT1-SDT	5204	Pavir.Ca01791.1	30206512	Pavir.Ca01791.1.p|PACid:30206512	0.1124	1.08102508428837	0.3492	5	AT4G39150.1	DNAJ heat shock N-terminal domain-containing protein	Abiotic/biotic stress
RT1-SDT	5300	Pavir.Gb01543.1	30223051	Pavir.Gb01543.1.p|PACid:30223051	0.1602	1.11744203769472	0.1459	5	AT4G39640.1	gamma-glutamyl transpeptidase 1	Abiotic/biotic stress
RT1-SDT	3682	Pavir.Ca00735.1	30207143	Pavir.Ca00735.1.p|PACid:30207143	0.1149	1.08289998201752	0.2778	6	AT5G01390.1	DNAJ heat shock family protein	Abiotic/biotic stress
RT1-SDT	33	Pavir.Ia03665.1	30210947	Pavir.Ia03665.1.p|PACid:30210947	2.0277	4.0775427426519	<.0001	18	AT5G02500.1	heat shock cognate protein 70-1	Abiotic/biotic stress
RT1-SDT	3665	Pavir.Ea04178.1	30227519	Pavir.Ea04178.1.p|PACid:30227519	0.4759	1.39078556645946	0.0011	2	AT5G03160.1	homolog of mamallian P58IPK	Abiotic/biotic stress
RT1-SDT	4555	Pavir.Eb04077.1	30310813	Pavir.Eb04077.1.p|PACid:30310813	0.4053	1.32436427557321	0.0181	2	AT5G03160.1	homolog of mamallian P58IPK	Abiotic/biotic stress
RT1-SDT	5181	Pavir.Ia01182.1	30215723	Pavir.Ia01182.1.p|PACid:30215723	1.1393	2.20274119572991	<.0001	4	AT5G04890.1	HSP20-like chaperones superfamily protein	Abiotic/biotic stress
RT1-SDT	6453	Pavir.Ea00435.1	30226173	Pavir.Ea00435.1.p|PACid:30226173	0.6448	1.56352252098708	0.0155	3	AT5G05500.1	Pollen Ole e 1 allergen and extensin family protein	Abiotic/biotic stress
RT1-SDT	7334	Pavir.Ia00205.1	30212699	Pavir.Ia00205.1.p|PACid:30212699	0.1207	1.08726227751157	0.6108	2	AT5G06320.1	NDR1/HIN1-like 3	Abiotic/biotic stress
RT1-SDT	3518	Pavir.Ca02112.1	30206985	Pavir.Ca02112.1.p|PACid:30206985	-0.1692	0.889335696885649	0.1414	9	AT5G06410.1	DNAJ heat shock N-terminal domain-containing protein	Abiotic/biotic stress
RT1-SDT	4685	Pavir.J14604.1	30256129	Pavir.J14604.1.p|PACid:30256129	-0.4741	0.71991575677017	0.0016	7	AT5G07390.1	respiratory burst oxidase homolog A	Abiotic/biotic stress
RT1-SDT	192	Pavir.Ba01698.1	30291323	Pavir.Ba01698.1.p|PACid:30291323	-1.1755	0.442730294331588	<.0001	6	AT5G09590.1	mitochondrial HSO70 2	Abiotic/biotic stress
RT1-SDT	93	Pavir.Ib03660.1	30238462	Pavir.Ib03660.1.p|PACid:30238462	0.07751	1.05519526801289	0.449	5	AT5G09590.1	mitochondrial HSO70 2	Abiotic/biotic stress
RT1-SDT	177	Pavir.J01963.1	30218288	Pavir.J01963.1.p|PACid:30218288	-1.4712	0.360682167083992	<.0001	6	AT5G09590.1	mitochondrial HSO70 2	Abiotic/biotic stress
RT1-SDT	1187	Pavir.Ea00289.1	30226451	Pavir.Ea00289.1.p|PACid:30226451	0.2557	1.19391489363719	0.4079	2	AT5G12020.1	17.6 kDa class II heat shock protein	Abiotic/biotic stress
RT1-SDT	805	Pavir.J36067.1	30201011	Pavir.J36067.1.p|PACid:30201011	0.3896	1.31003013602298	<.0001	11	AT5G12020.1	17.6 kDa class II heat shock protein	Abiotic/biotic stress
RT1-SDT	301	Pavir.Ab00778.1	30233092	Pavir.Ab00778.1.p|PACid:30233092	0.29298	1.22516834734723	<.0001	57	AT5G12030.1	heat shock protein 17.6A	Abiotic/biotic stress
RT1-SDT	519	Pavir.J29514.1	30196199	Pavir.J29514.1.p|PACid:30196199	1.6004	3.03227374128014	<.0001	25	AT5G12030.1	heat shock protein 17.6A	Abiotic/biotic stress
RT1-SDT	6377	Pavir.Eb00532.1	30310310	Pavir.Eb00532.1.p|PACid:30310310	-0.5384	0.688534094537921	0.0854	2	AT5G12430.1	Heat shock protein DnaJ with tetratricopeptide repeat	Abiotic/biotic stress
RT1-SDT	3291	Pavir.J35105.1	30255022	Pavir.J35105.1.p|PACid:30255022	0.4799	1.39464699343688	<.0001	10	AT5G14680.1	Adenine nucleotide alpha hydrolases-like superfamily protein	Abiotic/biotic stress
RT1-SDT	1025	Pavir.Ib02075.1	30240422	Pavir.Ib02075.1.p|PACid:30240422	0.62493	1.54213599868728	<.0001	8	AT5G15450.1	casein lytic proteinase B3	Abiotic/biotic stress
RT1-SDT	2447	Pavir.J25699.1	30246579	Pavir.J25699.1.p|PACid:30246579	1.2572	2.39031375459389	<.0001	7	AT5G15870.1	glycosyl hydrolase family 81 protein	Abiotic/biotic stress
RT1-SDT	4623	Pavir.Bb01925.1	30297973	Pavir.Bb01925.1.p|PACid:30297973	0.9996	1.99944555912093	<.0001	5	AT5G15870.1	glycosyl hydrolase family 81 protein	Abiotic/biotic stress
RT1-SDT	4397	Pavir.Ia00087.1	30209150	Pavir.Ia00087.1.p|PACid:30209150	-0.1381	0.908715126932678	0.3774	6	AT5G16820.1	heat shock factor 3	Abiotic/biotic stress
RT1-SDT	5396	Pavir.Hb01615.1	30266710	Pavir.Hb01615.1.p|PACid:30266710	-0.2262	0.854883657637565	0.2449	4	AT5G17540.1	HXXXD-type acyl-transferase family protein	Abiotic/biotic stress
RT1-SDT	5317	Pavir.J28827.1	30219442	Pavir.J28827.1.p|PACid:30219442	1.1187	2.17151211244292	<.0001	2	AT5G17540.1	HXXXD-type acyl-transferase family protein	Abiotic/biotic stress
RT1-SDT	4564	Pavir.J34843.1	30263732	Pavir.J34843.1.p|PACid:30263732	-0.05678	0.96140752453238	0.6207	5	AT5G17540.1	HXXXD-type acyl-transferase family protein	Abiotic/biotic stress
RT1-SDT	6406	Pavir.J09667.1	30308125	Pavir.J09667.1.p|PACid:30308125	1.4505	2.73302754455979	<.0001	3	AT5G17540.1	HXXXD-type acyl-transferase family protein	Abiotic/biotic stress
RT1-SDT	4901	Pavir.J02397.1	30315737	Pavir.J02397.1.p|PACid:30315737	0.3746	1.29648004421966	0.025	3	AT5G19690.1	staurosporin and temperature sensitive 3-like A	Abiotic/biotic stress
RT1-SDT	7280	Pavir.J15962.1	30284434	Pavir.J15962.1.p|PACid:30284434	1.8609	3.63234188740618	<.0001	2	AT5G20970.1	HSP20-like chaperones superfamily protein	Abiotic/biotic stress
RT1-SDT	7672	Pavir.Ib01101.1	30238414	Pavir.Ib01101.1.p|PACid:30238414	0.2608	1.19814291194959	0.2898	2	AT5G22080.1	Chaperone DnaJ-domain superfamily protein	Abiotic/biotic stress
RT1-SDT	2460	Pavir.Bb01424.1	30300862	Pavir.Bb01424.1.p|PACid:30300862	-0.60467	0.657621786366764	<.0001	22	AT5G23950.1	Calcium-dependent lipid-binding (CaLB domain) family protein	Abiotic/biotic stress
RT1-SDT	4414	Pavir.Eb01034.1	30311864	Pavir.Eb01034.1.p|PACid:30311864	-0.7231	0.60579433829605	<.0001	8	AT5G23950.1	Calcium-dependent lipid-binding (CaLB domain) family protein	Abiotic/biotic stress
RT1-SDT	4579	Pavir.J22514.1	30190667	Pavir.J22514.1.p|PACid:30190667	-0.543	0.686342215627455	0.0455	3	AT5G23950.1	Calcium-dependent lipid-binding (CaLB domain) family protein	Abiotic/biotic stress
RT1-SDT	7890	Pavir.Fa00051.1	30186398	Pavir.Fa00051.1.p|PACid:30186398	0.1629	1.11953528569208	0.3216	2	AT5G23950.1	Calcium-dependent lipid-binding (CaLB domain) family protein	Abiotic/biotic stress
RT1-SDT	4091	Pavir.Bb00478.1	30300637	Pavir.Bb00478.1.p|PACid:30300637	1.5577	2.94384150605298	<.0001	7	AT5G24090.1	chitinase A	Abiotic/biotic stress
RT1-SDT	6328	Pavir.J28620.1	30314458	Pavir.J28620.1.p|PACid:30314458	1.4865	2.80208360168426	<.0001	3	AT5G24090.1	chitinase A	Abiotic/biotic stress
RT1-SDT	4687	Pavir.Ea02477.1	30226286	Pavir.Ea02477.1.p|PACid:30226286	2.0323	4.090564643011	<.0001	3	AT5G24090.1	chitinase A	Abiotic/biotic stress
RT1-SDT	2853	Pavir.Ga02283.1	30306035	Pavir.Ga02283.1.p|PACid:30306035	2.4805	5.5809085257746	<.0001	15	AT5G24090.1	chitinase A	Abiotic/biotic stress
RT1-SDT	5924	Pavir.Hb01412.1	30266803	Pavir.Hb01412.1.p|PACid:30266803	0.7381	1.66797769904703	0.0002	3	AT5G24090.1	chitinase A	Abiotic/biotic stress
RT1-SDT	2276	Pavir.J36816.1	30185282	Pavir.J36816.1.p|PACid:30185282	-0.20901	0.865130693935192	0.0076	19	AT5G25530.1	DNAJ heat shock family protein	Abiotic/biotic stress
RT1-SDT	2620	Pavir.Da01560.5	30193842	Pavir.Da01560.5.p|PACid:30193842	-0.4611	0.72643217059947	0.0008	13	AT5G25610.1	BURP domain-containing protein	Abiotic/biotic stress
RT1-SDT	2737	Pavir.Fb01659.1	30279399	Pavir.Fb01659.1.p|PACid:30279399	0.8984	1.86399759684263	<.0001	12	AT5G25610.1	BURP domain-containing protein	Abiotic/biotic stress
RT1-SDT	6553	Pavir.Da01355.1	30193782	Pavir.Da01355.1.p|PACid:30193782	-0.12	0.920187650624875	0.494	3	AT5G37670.1	HSP20-like chaperones superfamily protein	Abiotic/biotic stress
RT1-SDT	3718	Pavir.J17471.1	30294892	Pavir.J17471.1.p|PACid:30294892	1.8231	3.5384069965095	<.0001	11	AT5G39110.1	RmlC-like cupins superfamily protein	Abiotic/biotic stress
RT1-SDT	6293	Pavir.Ia01975.1	30210367	Pavir.Ia01975.1.p|PACid:30210367	1.0615	2.08710039560737	<.0001	4	AT5G40020.1	Pathogenesis-related thaumatin superfamily protein	Abiotic/biotic stress
RT1-SDT	55	Pavir.Ab00168.1	30235837	Pavir.Ab00168.1.p|PACid:30235837	-0.6051	0.657425809238578	0.0003	6	AT5G42020.1	Heat shock protein 70 (Hsp 70) family protein	Abiotic/biotic stress
RT1-SDT	51	Pavir.J03393.1	30196500	Pavir.J03393.1.p|PACid:30196500	-0.45543	0.729292771614997	<.0001	43	AT5G42020.1	Heat shock protein 70 (Hsp 70) family protein	Abiotic/biotic stress
RT1-SDT	4635	Pavir.Aa03473.1	30252074	Pavir.Aa03473.1.p|PACid:30252074	-0.01438	0.990082054003325	0.9071	5	AT5G42480.1	Chaperone DnaJ-domain superfamily protein	Abiotic/biotic stress
RT1-SDT	6719	Pavir.Bb00092.1	30301521	Pavir.Bb00092.1.p|PACid:30301521	0.8396	1.78955390336883	0.0002	2	AT5G42510.1	Disease resistance-responsive (dirigent-like protein) family protein	Abiotic/biotic stress
RT1-SDT	6028	Pavir.J34549.1	30287513	Pavir.J34549.1.p|PACid:30287513	0.6444	1.56308908058659	0.0044	2	AT5G42510.1	Disease resistance-responsive (dirigent-like protein) family protein	Abiotic/biotic stress
RT1-SDT	5057	Pavir.Gb00637.1	30223473	Pavir.Gb00637.1.p|PACid:30223473	0.3068	1.23696098759639	0.0105	4	AT5G42510.1	Disease resistance-responsive (dirigent-like protein) family protein	Abiotic/biotic stress
RT1-SDT	6163	Pavir.Bb01292.1	30297102	Pavir.Bb01292.1.p|PACid:30297102	0.2177	1.16287820267998	0.1502	3	AT5G45860.1	PYR1-like 11	Abiotic/biotic stress
RT1-SDT	6153	Pavir.Hb00822.1	30266118	Pavir.Hb00822.1.p|PACid:30266118	0.246	1.18591449941095	0.2982	3	AT5G47910.1	respiratory burst oxidase homologue D	Abiotic/biotic stress
RT1-SDT	2394	Pavir.Db02390.1	30260218	Pavir.Db02390.1.p|PACid:30260218	-0.44003	0.737119280521651	<.0001	16	AT5G48030.1	gametophytic factor 2	Abiotic/biotic stress
RT1-SDT	4917	Pavir.J33922.1	30255392	Pavir.J33922.1.p|PACid:30255392	-0.7779	0.583215108884067	<.0001	4	AT5G48030.1	gametophytic factor 2	Abiotic/biotic stress
RT1-SDT	5293	Pavir.J03321.1	30216779	Pavir.J03321.1.p|PACid:30216779	-0.6715	0.627853555399776	<.0001	4	AT5G48030.1	gametophytic factor 2	Abiotic/biotic stress
RT1-SDT	4212	Pavir.J19923.1	30256925	Pavir.J19923.1.p|PACid:30256925	-0.1279	0.915162600167122	0.6191	2	AT5G51060.1	NADPH/respiratory burst oxidase protein D	Abiotic/biotic stress
RT1-SDT	1424	Pavir.Aa00531.2	30253211	Pavir.Aa00531.2.p|PACid:30253211	-0.59698	0.661136467805331	<.0001	3	AT5G51440.1	HSP20-like chaperones superfamily protein	Abiotic/biotic stress
RT1-SDT	1463	Pavir.Aa00531.1	30253210	Pavir.Aa00531.1.p|PACid:30253210	-1.2893	0.409149501701759	<.0001	2	AT5G51440.1	HSP20-like chaperones superfamily protein	Abiotic/biotic stress
RT1-SDT	1818	Pavir.J02251.1	30274612	Pavir.J02251.1.p|PACid:30274612	-0.8461	0.556286500114125	0.0005	7	AT5G51440.1	HSP20-like chaperones superfamily protein	Abiotic/biotic stress
RT1-SDT	5515	Pavir.Aa01984.1	30250204	Pavir.Aa01984.1.p|PACid:30250204	-0.7848	0.580432416633327	0.0037	3	AT5G51700.1	protein binding;zinc ion binding	Abiotic/biotic stress
RT1-SDT	2097	Pavir.Ab01831.1	30233520	Pavir.Ab01831.1.p|PACid:30233520	-0.47801	0.71796727872452	<.0001	20	AT5G51700.1	protein binding;zinc ion binding	Abiotic/biotic stress
RT1-SDT	2132	Pavir.Ba01275.1	30293657	Pavir.Ba01275.1.p|PACid:30293657	-0.738	0.599569956895556	<.0001	10	AT5G52060.1	BCL-2-associated athanogene 1	Abiotic/biotic stress
RT1-SDT	2579	Pavir.Da02354.1	30192408	Pavir.Da02354.1.p|PACid:30192408	-1.2072	0.43310838246725	<.0001	8	AT5G52060.1	BCL-2-associated athanogene 1	Abiotic/biotic stress
RT1-SDT	3077	Pavir.Fa00228.1	30186446	Pavir.Fa00228.1.p|PACid:30186446	-0.2271	0.85435051977191	0.0461	6	AT5G52060.1	BCL-2-associated athanogene 1	Abiotic/biotic stress
RT1-SDT	2438	Pavir.J11116.1	30277030	Pavir.J11116.1.p|PACid:30277030	-0.9932	0.502362263187171	<.0001	5	AT5G52060.1	BCL-2-associated athanogene 1	Abiotic/biotic stress
RT1-SDT	3577	Pavir.J27820.1	30275062	Pavir.J27820.1.p|PACid:30275062	-0.4831	0.715438667863194	0.0003	7	AT5G52060.1	BCL-2-associated athanogene 1	Abiotic/biotic stress
RT1-SDT	611	Pavir.J31919.1	30199244	Pavir.J31919.1.p|PACid:30199244	2.0567	4.16033585861247	<.0001	7	AT5G52300.2	CAP160 protein	Abiotic/biotic stress
RT1-SDT	1125	Pavir.J20033.1	30200741	Pavir.J20033.1.p|PACid:30200741	0.2142	1.16006046188655	0.0821	5	AT5G52640.1	heat shock protein 90.1	Abiotic/biotic stress
RT1-SDT	2470	Pavir.J22115.1	30314772	Pavir.J22115.1.p|PACid:30314772	-0.60019	0.659667072854832	<.0001	18	AT5G52640.1	heat shock protein 90.1	Abiotic/biotic stress
RT1-SDT	5948	Pavir.Ca01301.1	30206463	Pavir.Ca01301.1.p|PACid:30206463	-0.616	0.652477473844479	0.0012	3	AT5G54660.1	HSP20-like chaperones superfamily protein	Abiotic/biotic stress
RT1-SDT	4289	Pavir.Ib00596.1	30238450	Pavir.Ib00596.1.p|PACid:30238450	-0.01194	0.991757975935307	0.9131	5	AT5G55530.1	Calcium-dependent lipid-binding (CaLB domain) family protein	Abiotic/biotic stress
RT1-SDT	923	Pavir.J28979.1	30258095	Pavir.J28979.1.p|PACid:30258095	0.09044	1.06469484864402	0.5622	6	AT5G55530.1	Calcium-dependent lipid-binding (CaLB domain) family protein	Abiotic/biotic stress
RT1-SDT	848	Pavir.J40782.1	30315692	Pavir.J40782.1.p|PACid:30315692	-0.07541	0.949072365419339	0.3073	15	AT5G55530.1	Calcium-dependent lipid-binding (CaLB domain) family protein	Abiotic/biotic stress
RT1-SDT	396	Pavir.Bb02408.1	30296941	Pavir.Bb02408.1.p|PACid:30296941	0.03812	1.02677494690736	0.6785	5	AT5G56030.1	heat shock protein 81-2	Abiotic/biotic stress
RT1-SDT	299	Pavir.Fa00544.1	30185761	Pavir.Fa00544.1.p|PACid:30185761	-0.1503	0.901063072329721	0.1735	4	AT5G56030.1	heat shock protein 81-2	Abiotic/biotic stress
RT1-SDT	307	Pavir.J37823.1	30199614	Pavir.J37823.1.p|PACid:30199614	-0.7128	0.610134831921262	0.0415	2	AT5G56030.1	heat shock protein 81-2	Abiotic/biotic stress
RT1-SDT	504	Pavir.J11329.1	30271593	Pavir.J11329.1.p|PACid:30271593	-0.4753	0.719317196646382	<.0001	11	AT5G56030.2	heat shock protein 81-2	Abiotic/biotic stress
RT1-SDT	647	Pavir.Ea00606.1	30226304	Pavir.Ea00606.1.p|PACid:30226304	2.4427	5.4365823445606	<.0001	16	AT5G59720.1	heat shock protein 18.2	Abiotic/biotic stress
RT1-SDT	744	Pavir.Eb00769.1	30314162	Pavir.Eb00769.1.p|PACid:30314162	1.5182	2.86433453596155	<.0001	10	AT5G59720.1	heat shock protein 18.2	Abiotic/biotic stress
RT1-SDT	1115	Pavir.J19824.1	30189354	Pavir.J19824.1.p|PACid:30189354	1.49199	2.81276690314418	<.0001	4	AT5G59720.1	heat shock protein 18.2	Abiotic/biotic stress
RT1-SDT	5067	Pavir.J37978.1	30197137	Pavir.J37978.1.p|PACid:30197137	1.5384	2.90472180806415	0.0002	2	AT5G59720.1	heat shock protein 18.2	Abiotic/biotic stress
RT1-SDT	2514	Pavir.Ga01795.1	30304157	Pavir.Ga01795.1.p|PACid:30304157	0.7858	1.72404806965622	0.0002	2	AT5G63860.1	Regulator of chromosome condensation (RCC1) family protein	Abiotic/biotic stress
RT1-SDT	2543	Pavir.Gb01637.1	30224330	Pavir.Gb01637.1.p|PACid:30224330	1.2528	2.38303476748226	<.0001	2	AT5G63860.1	Regulator of chromosome condensation (RCC1) family protein	Abiotic/biotic stress
RT1-SDT	4905	Pavir.J05948.1	30199331	Pavir.J05948.1.p|PACid:30199331	-0.001356	0.99906053399793	0.993	3	AT5G64030.1	S-adenosyl-L-methionine-dependent methyltransferases superfamily protein	Abiotic/biotic stress
RT1-SDT	4415	Pavir.Bb03355.1	30301019	Pavir.Bb03355.1.p|PACid:30301019	0.06547	1.04642578799866	0.6898	2	AT5G64360.2	Chaperone DnaJ-domain superfamily protein	Abiotic/biotic stress
RT1-SDT	3475	Pavir.Cb00662.1	30269981	Pavir.Cb00662.1.p|PACid:30269981	2.8857	7.39064357864723	<.0001	4	AT5G66400.1	Dehydrin family protein	Abiotic/biotic stress
RT1-SDT	603	Pavir.J13075.1	30246880	Pavir.J13075.1.p|PACid:30246880	1.35293	2.55430357980131	<.0001	22	AT5G66400.1	Dehydrin family protein	Abiotic/biotic stress
RT1-SDT	4107	Pavir.J05552.1	30208561	Pavir.J05552.1.p|PACid:30208561	-0.1133	0.924471019780633	0.3534	4	AT5G66590.1	CAP (Cysteine-rich secretory proteins, Antigen 5, and Pathogenesis-related 1 protein) superfamily protein	Abiotic/biotic stress
RT1-SDT	185	Pavir.Eb01271.1	30312791	Pavir.Eb01271.1.p|PACid:30312791	-0.34757	0.785906723845558	<.0001	13	AT1G02500.1	S-adenosylmethionine synthetase 1	Amino acid metabolism
RT1-SDT	867	Pavir.Ea01624.1	30230005	Pavir.Ea01624.1.p|PACid:30230005	-0.5752	0.671193197805764	0.0012	4	AT1G02500.1	S-adenosylmethionine synthetase 1	Amino acid metabolism
RT1-SDT	44	Pavir.Ia00423.1	30215239	Pavir.Ia00423.1.p|PACid:30215239	-0.32546	0.79804389132454	0.0001	21	AT1G02500.1	S-adenosylmethionine synthetase 1	Amino acid metabolism
RT1-SDT	4823	Pavir.Cb00192.1	30269989	Pavir.Cb00192.1.p|PACid:30269989	1.5323	2.892465997955	<.0001	3	AT1G03090.2	methylcrotonyl-CoA carboxylase alpha chain, mitochondrial / 3-methylcrotonyl-CoA carboxylase 1 (MCCA)	Amino acid metabolism
RT1-SDT	5794	Pavir.Ab01101.1	30232939	Pavir.Ab01101.1.p|PACid:30232939	-0.7334	0.601484722902871	0.0022	3	AT1G07780.1	phosphoribosylanthranilate isomerase 1	Amino acid metabolism
RT1-SDT	2637	Pavir.Db01186.1	30260571	Pavir.Db01186.1.p|PACid:30260571	-0.5689	0.674130591421003	0.032	2	AT1G07780.1	phosphoribosylanthranilate isomerase 1	Amino acid metabolism
RT1-SDT	2305	Pavir.Ga02223.1	30303378	Pavir.Ga02223.1.p|PACid:30303378	0.3799	1.30125165642422	0.0132	2	AT1G08110.4	lactoylglutathione lyase family protein / glyoxalase I family protein	Amino acid metabolism
RT1-SDT	1801	Pavir.J00728.1	30256335	Pavir.J00728.1.p|PACid:30256335	0.6668	1.58754776575619	<.0001	6	AT1G08110.4	lactoylglutathione lyase family protein / glyoxalase I family protein	Amino acid metabolism
RT1-SDT	2540	Pavir.Bb01712.1	30300654	Pavir.Bb01712.1.p|PACid:30300654	0.3885	1.30903166865326	0.0007	8	AT1G08250.1	arogenate dehydratase 6	Amino acid metabolism
RT1-SDT	3265	Pavir.J07298.1	30272508	Pavir.J07298.1.p|PACid:30272508	-0.1245	0.917321907666758	0.2299	7	AT1G08250.1	arogenate dehydratase 6	Amino acid metabolism
RT1-SDT	4332	Pavir.Ga01212.1	30302700	Pavir.Ga01212.1.p|PACid:30302700	0.04954	1.03493488461728	0.5647	5	AT1G08630.1	threonine aldolase 1	Amino acid metabolism
RT1-SDT	3058	Pavir.Ib00200.1	30237073	Pavir.Ib00200.1.p|PACid:30237073	0.16339	1.11991559160851	0.0612	8	AT1G09795.1	ATP phosphoribosyl transferase 2	Amino acid metabolism
RT1-SDT	4895	Pavir.J09629.1	30246637	Pavir.J09629.1.p|PACid:30246637	0.5632	1.47754288032175	0.0001	3	AT1G09795.1	ATP phosphoribosyl transferase 2	Amino acid metabolism
RT1-SDT	333	Pavir.Fa02123.1	30186363	Pavir.Fa02123.1.p|PACid:30186363	1.34951	2.5482556127079	<.0001	38	AT1G11840.6	glyoxalase I homolog	Amino acid metabolism
RT1-SDT	366	Pavir.Fb00620.1	30278273	Pavir.Fb00620.1.p|PACid:30278273	1.42039	2.6765785643083	<.0001	43	AT1G11840.6	glyoxalase I homolog	Amino acid metabolism
RT1-SDT	1180	Pavir.Aa03005.1	30253781	Pavir.Aa03005.1.p|PACid:30253781	0.63619	1.55421921159648	<.0001	29	AT1G12050.1	fumarylacetoacetase, putative	Amino acid metabolism
RT1-SDT	1746	Pavir.J35802.1	30246055	Pavir.J35802.1.p|PACid:30246055	0.66219	1.58248299843737	<.0001	18	AT1G12050.1	fumarylacetoacetase, putative	Amino acid metabolism
RT1-SDT	441	Pavir.Ia00376.1	30210269	Pavir.Ia00376.1.p|PACid:30210269	-0.05432	0.963048259388749	0.4339	11	AT1G14810.1	semialdehyde dehydrogenase family protein	Amino acid metabolism
RT1-SDT	387	Pavir.J00209.1	30282251	Pavir.J00209.1.p|PACid:30282251	-0.09456	0.93655783974909	0.0988	17	AT1G14810.1	semialdehyde dehydrogenase family protein	Amino acid metabolism
RT1-SDT	389	Pavir.Fa00827.1	30186007	Pavir.Fa00827.1.p|PACid:30186007	-4.22e-05	0.999970749616781	0.9995	10	AT1G17745.2	D-3-phosphoglycerate dehydrogenase	Amino acid metabolism
RT1-SDT	255	Pavir.Fb01524.1	30279289	Pavir.Fb01524.1.p|PACid:30279289	0.14961	1.10926956557517	0.0004	36	AT1G17745.2	D-3-phosphoglycerate dehydrogenase	Amino acid metabolism
RT1-SDT	2767	Pavir.J41079.1	30200876	Pavir.J41079.1.p|PACid:30200876	-0.56832	0.674401663503166	<.0001	14	AT1G18640.2	3-phosphoserine phosphatase	Amino acid metabolism
RT1-SDT	232	Pavir.Ba00389.1	30289020	Pavir.Ba00389.1.p|PACid:30289020	-0.09685	0.935072414118594	0.1663	22	AT1G22410.1	Class-II DAHP synthetase family protein	Amino acid metabolism
RT1-SDT	287	Pavir.Bb03363.1	30301293	Pavir.Bb03363.1.p|PACid:30301293	-0.18148	0.881797932825385	0.0679	13	AT1G22410.1	Class-II DAHP synthetase family protein	Amino acid metabolism
RT1-SDT	556	Pavir.Ib01852.1	30239506	Pavir.Ib01852.1.p|PACid:30239506	0.36976	1.29213785874584	0.0002	10	AT1G22410.1	Class-II DAHP synthetase family protein	Amino acid metabolism
RT1-SDT	1630	Pavir.Fa00618.1	30186366	Pavir.Fa00618.1.p|PACid:30186366	-0.1436	0.905257418742421	0.3025	5	AT1G22410.1	Class-II DAHP synthetase family protein	Amino acid metabolism
RT1-SDT	3053	Pavir.Bb00083.1	30300628	Pavir.Bb00083.1.p|PACid:30300628	0.61702	1.53370392117669	<.0001	5	AT1G23310.1	glutamate:glyoxylate aminotransferase	Amino acid metabolism
RT1-SDT	965	Pavir.Ga01440.1	30304075	Pavir.Ga01440.1.p|PACid:30304075	-0.34747	0.78596120063654	<.0001	29	AT1G25220.1	anthranilate synthase beta subunit 1	Amino acid metabolism
RT1-SDT	1130	Pavir.Gb01513.1	30222627	Pavir.Gb01513.1.p|PACid:30222627	-0.35377	0.782536526779641	<.0001	19	AT1G25220.1	anthranilate synthase beta subunit 1	Amino acid metabolism
RT1-SDT	2960	Pavir.Ba02744.1	30291137	Pavir.Ba02744.1.p|PACid:30291137	0.2705	1.20622580126391	0.2012	2	AT1G31230.1	aspartate kinase-homoserine dehydrogenase i	Amino acid metabolism
RT1-SDT	2967	Pavir.Ea01085.1	30228307	Pavir.Ea01085.1.p|PACid:30228307	-0.15032	0.901050581029743	0.1023	10	AT1G31860.1	histidine biosynthesis bifunctional protein (HISIE)	Amino acid metabolism
RT1-SDT	4292	Pavir.J31321.1	30189451	Pavir.J31321.1.p|PACid:30189451	0.1131	1.08154972819998	0.2733	4	AT1G43710.1	Pyridoxal phosphate (PLP)-dependent transferases superfamily protein	Amino acid metabolism
RT1-SDT	480	Pavir.Ia03891.1	30211114	Pavir.Ia03891.1.p|PACid:30211114	0.1492	1.10895436666608	0.201	8	AT1G48850.1	chorismate synthase, putative / 5-enolpyruvylshikimate-3-phosphate phospholyase, putative	Amino acid metabolism
RT1-SDT	345	Pavir.Ib01071.1	30237963	Pavir.Ib01071.1.p|PACid:30237963	-0.30607	0.808842102146044	<.0001	15	AT1G48850.1	chorismate synthase, putative / 5-enolpyruvylshikimate-3-phosphate phospholyase, putative	Amino acid metabolism
RT1-SDT	6966	Pavir.Ia01492.1	30213590	Pavir.Ia01492.1.p|PACid:30213590	0.37067	1.29295314980636	0.0039	2	AT1G50575.1	Putative lysine decarboxylase family protein	Amino acid metabolism
RT1-SDT	6251	Pavir.Ib00762.1	30237312	Pavir.Ib00762.1.p|PACid:30237312	0.1213	1.08771455122203	0.4053	2	AT1G55880.1	Pyridoxal-5\'-phosphate-dependent enzyme family protein	Amino acid metabolism
RT1-SDT	4298	Pavir.Ib03758.1	30242232	Pavir.Ib03758.1.p|PACid:30242232	0.9752	1.96591371171009	<.0001	5	AT1G64660.1	methionine gamma-lyase	Amino acid metabolism
RT1-SDT	5925	Pavir.J39617.1	30277647	Pavir.J39617.1.p|PACid:30277647	0.564	1.47836243127384	0.0038	2	AT1G67550.1	urease	Amino acid metabolism
RT1-SDT	2612	Pavir.Ea02802.1	30226099	Pavir.Ea02802.1.p|PACid:30226099	0.84795	1.79994147728802	<.0001	4	AT1G69370.1	chorismate mutase 3	Amino acid metabolism
RT1-SDT	5494	Pavir.Ab00295.1	30235902	Pavir.Ab00295.1.p|PACid:30235902	0.7076	1.63308513210262	<.0001	2	AT1G70570.1	anthranilate phosphoribosyltransferase, putative	Amino acid metabolism
RT1-SDT	4171	Pavir.J03678.1	30259607	Pavir.J03678.1.p|PACid:30259607	0.60205	1.51787185749241	<.0001	5	AT1G70570.1	anthranilate phosphoribosyltransferase, putative	Amino acid metabolism
RT1-SDT	1229	Pavir.Ba00407.1	30291743	Pavir.Ba00407.1.p|PACid:30291743	0.46877	1.38392906716147	<.0001	22	AT1G72330.1	alanine aminotransferase 2	Amino acid metabolism
RT1-SDT	188	Pavir.Ca00075.2	30205938	Pavir.Ca00075.2.p|PACid:30205938	0.15632	1.11444081428968	0.1076	9	AT1G74040.1	2-isopropylmalate synthase 1	Amino acid metabolism
RT1-SDT	164	Pavir.Ha01796.1	30318597	Pavir.Ha01796.1.p|PACid:30318597	0.28407	1.21762509676793	<.0001	18	AT1G74040.1	2-isopropylmalate synthase 1	Amino acid metabolism
RT1-SDT	1966	Pavir.J12020.1	30245427	Pavir.J12020.1.p|PACid:30245427	0.40331	1.322538755956	<.0001	10	AT1G75330.1	ornithine carbamoyltransferase	Amino acid metabolism
RT1-SDT	2535	Pavir.Aa03402.1	30249766	Pavir.Aa03402.1.p|PACid:30249766	0.60707	1.52316264222273	<.0001	13	AT1G79230.1	mercaptopyruvate sulfurtransferase 1	Amino acid metabolism
RT1-SDT	1471	Pavir.Ca02812.1	30203168	Pavir.Ca02812.1.p|PACid:30203168	0.59021	1.5054658684416	<.0001	11	AT1G79230.1	mercaptopyruvate sulfurtransferase 1	Amino acid metabolism
RT1-SDT	1021	Pavir.Cb00205.1	30270312	Pavir.Cb00205.1.p|PACid:30270312	0.74127	1.67164673682088	<.0001	19	AT1G79230.1	mercaptopyruvate sulfurtransferase 1	Amino acid metabolism
RT1-SDT	3762	Pavir.J35466.1	30196064	Pavir.J35466.1.p|PACid:30196064	0.68281	1.60526335359432	<.0001	8	AT1G80360.1	Pyridoxal phosphate (PLP)-dependent transferases superfamily protein	Amino acid metabolism
RT1-SDT	514	Pavir.J22090.1	30270849	Pavir.J22090.1.p|PACid:30270849	-0.05006	0.965896157597611	0.1478	46	AT1G80600.1	HOPW1-1-interacting 1	Amino acid metabolism
RT1-SDT	953	Pavir.Db02344.1	30262703	Pavir.Db02344.1.p|PACid:30262703	-0.06277	0.957424082263757	0.3713	14	AT2G04400.1	Aldolase-type TIM barrel family protein	Amino acid metabolism
RT1-SDT	944	Pavir.J04870.1	30267153	Pavir.J04870.1.p|PACid:30267153	-0.20513	0.867460517514667	0.0165	13	AT2G04400.1	Aldolase-type TIM barrel family protein	Amino acid metabolism
RT1-SDT	1206	Pavir.Ba03516.1	30289888	Pavir.Ba03516.1.p|PACid:30289888	0.53303	1.44696497434846	0.0002	2	AT2G14170.1	aldehyde dehydrogenase 6B2	Amino acid metabolism
RT1-SDT	672	Pavir.Bb00543.1	30299044	Pavir.Bb00543.1.p|PACid:30299044	0.58607	1.50115193209343	<.0001	19	AT2G14170.1	aldehyde dehydrogenase 6B2	Amino acid metabolism
RT1-SDT	1275	Pavir.Bb03177.1	30298917	Pavir.Bb03177.1.p|PACid:30298917	0.115	1.08297504552592	0.1078	11	AT2G17265.1	homoserine kinase	Amino acid metabolism
RT1-SDT	2545	Pavir.Ia01285.1	30214381	Pavir.Ia01285.1.p|PACid:30214381	0.36869	1.29117987740792	<.0001	13	AT2G19940.1	oxidoreductases, acting on the aldehyde or oxo group of donors, NAD or NADP as acceptor;copper ion binding	Amino acid metabolism
RT1-SDT	1820	Pavir.Ib03953.1	30237749	Pavir.Ib03953.1.p|PACid:30237749	0.42436	1.34197705064474	<.0001	14	AT2G19940.1	oxidoreductases, acting on the aldehyde or oxo group of donors, NAD or NADP as acceptor;copper ion binding	Amino acid metabolism
RT1-SDT	2075	Pavir.J02478.1	30306182	Pavir.J02478.1.p|PACid:30306182	0.7011	1.62574388804249	0.0023	2	AT2G22250.2	aspartate aminotransferase	Amino acid metabolism
RT1-SDT	1723	Pavir.J16987.1	30191258	Pavir.J16987.1.p|PACid:30191258	-0.6922	0.618909340418444	0.0004	8	AT2G24580.1	FAD-dependent oxidoreductase family protein	Amino acid metabolism
RT1-SDT	5418	Pavir.Ea00947.1	30231028	Pavir.Ea00947.1.p|PACid:30231028	1.1787	2.26372702647352	<.0001	4	AT2G24580.1	FAD-dependent oxidoreductase family protein	Amino acid metabolism
RT1-SDT	3763	Pavir.J00847.1	30256409	Pavir.J00847.1.p|PACid:30256409	-0.16235	0.893568355023884	0.1108	4	AT2G24580.1	FAD-dependent oxidoreductase family protein	Amino acid metabolism
RT1-SDT	4131	Pavir.Ea01126.1	30226504	Pavir.Ea01126.1.p|PACid:30226504	0.88236	1.84338830119663	<.0001	13	AT2G26800.1	Aldolase superfamily protein	Amino acid metabolism
RT1-SDT	3233	Pavir.Ib02496.1	30240419	Pavir.Ib02496.1.p|PACid:30240419	-0.10935	0.927005626185915	0.1822	9	AT2G27820.1	prephenate dehydratase 1	Amino acid metabolism
RT1-SDT	231	Pavir.Ia03849.1	30211097	Pavir.Ia03849.1.p|PACid:30211097	0.07421	1.05278438780812	0.5844	5	AT2G29690.1	anthranilate synthase 2	Amino acid metabolism
RT1-SDT	223	Pavir.Ib01120.1	30238695	Pavir.Ib01120.1.p|PACid:30238695	-0.03995	0.972688657648159	0.7717	10	AT2G29690.1	anthranilate synthase 2	Amino acid metabolism
RT1-SDT	1306	Pavir.Ab01214.1	30232344	Pavir.Ab01214.1.p|PACid:30232344	0.24094	1.1817623977959	<.0001	20	AT2G30970.1	aspartate aminotransferase 1	Amino acid metabolism
RT1-SDT	2268	Pavir.J06248.1	30217879	Pavir.J06248.1.p|PACid:30217879	0.2236	1.16764361017862	0.0954	4	AT2G30970.1	aspartate aminotransferase 1	Amino acid metabolism
RT1-SDT	2513	Pavir.Aa01504.1	30252542	Pavir.Aa01504.1.p|PACid:30252542	0.21421	1.1600685028408	0.0006	13	AT2G31810.1	ACT domain-containing small subunit of acetolactate synthase protein	Amino acid metabolism
RT1-SDT	630	Pavir.Ab03297.1	30235915	Pavir.Ab03297.1.p|PACid:30235915	0.88546	1.84735355200102	<.0001	22	AT2G33150.1	peroxisomal 3-ketoacyl-CoA thiolase 3	Amino acid metabolism
RT1-SDT	375	Pavir.Ia04746.1	30214053	Pavir.Ia04746.1.p|PACid:30214053	0.08567	1.06118044828868	0.1283	45	AT2G33150.1	peroxisomal 3-ketoacyl-CoA thiolase 3	Amino acid metabolism
RT1-SDT	681	Pavir.Ib00851.1	30241776	Pavir.Ib00851.1.p|PACid:30241776	-0.1605	0.894714932621728	0.2489	7	AT2G33150.1	peroxisomal 3-ketoacyl-CoA thiolase 3	Amino acid metabolism
RT1-SDT	773	Pavir.J16366.1	30272430	Pavir.J16366.1.p|PACid:30272430	1.08227	2.11736501698197	<.0001	21	AT2G33150.1	peroxisomal 3-ketoacyl-CoA thiolase 3	Amino acid metabolism
RT1-SDT	3480	Pavir.J02192.1	30197458	Pavir.J02192.1.p|PACid:30197458	-0.126	0.916368644675351	0.606	2	AT2G34470.1	urease accessory protein G	Amino acid metabolism
RT1-SDT	5741	Pavir.J32274.1	30243161	Pavir.J32274.1.p|PACid:30243161	0.04026	1.02829912824499	0.7219	2	AT2G34470.2	urease accessory protein G	Amino acid metabolism
RT1-SDT	2168	Pavir.J02363.1	30207626	Pavir.J02363.1.p|PACid:30207626	-0.25069	0.840494334577484	0.0016	10	AT2G36230.1	Aldolase-type TIM barrel family protein	Amino acid metabolism
RT1-SDT	1662	Pavir.Ib01294.1	30239879	Pavir.Ib01294.1.p|PACid:30239879	0.09851	1.07066711778205	0.3155	4	AT2G37500.1	arginine biosynthesis protein ArgJ family	Amino acid metabolism
RT1-SDT	1520	Pavir.Ia03653.3	30210822	Pavir.Ia03653.3.p|PACid:30210822	0.6445	1.56319742942055	<.0001	5	AT2G37500.1	arginine biosynthesis protein ArgJ family	Amino acid metabolism
RT1-SDT	2272	Pavir.J06546.1	30308000	Pavir.J06546.1.p|PACid:30308000	0.41316	1.33159928413392	<.0001	25	AT2G39800.1	delta1-pyrroline-5-carboxylate synthase 1	Amino acid metabolism
RT1-SDT	545	Pavir.Eb00990.1	30309729	Pavir.Eb00990.1.p|PACid:30309729	0.2869	1.22001594228029	0.01	3	AT2G43750.1	O-acetylserine (thiol) lyase B	Amino acid metabolism
RT1-SDT	2009	Pavir.Ga02401.1	30303558	Pavir.Ga02401.1.p|PACid:30303558	-0.08371	0.943627913010422	0.0388	23	AT2G43750.1	O-acetylserine (thiol) lyase B	Amino acid metabolism
RT1-SDT	564	Pavir.Ea00813.1	30230206	Pavir.Ea00813.1.p|PACid:30230206	0.2981	1.22952408841654	0.0145	3	AT2G43750.1	O-acetylserine (thiol) lyase B	Amino acid metabolism
RT1-SDT	5896	Pavir.Db02160.1	30261797	Pavir.Db02160.1.p|PACid:30261797	0.2767	1.21142072637876	0.0537	2	AT2G43940.1	S-adenosyl-L-methionine-dependent methyltransferases superfamily protein	Amino acid metabolism
RT1-SDT	2137	Pavir.Db02287.1	30262927	Pavir.Db02287.1.p|PACid:30262927	0.22868	1.17176234964191	<.0001	24	AT2G45300.1	RNA 3\'-terminal phosphate cyclase/enolpyruvate transferase, alpha/beta	Amino acid metabolism
RT1-SDT	3573	Pavir.Ia03265.1	30213505	Pavir.Ia03265.1.p|PACid:30213505	0.1876	1.13886757230557	0.0156	9	AT3G01120.1	Pyridoxal phosphate (PLP)-dependent transferases superfamily protein	Amino acid metabolism
RT1-SDT	217	Pavir.J10121.1	30244273	Pavir.J10121.1.p|PACid:30244273	0.75182	1.68391579784204	<.0001	15	AT3G03780.1	methionine synthase 2	Amino acid metabolism
RT1-SDT	5641	Pavir.Ea01978.1	30228217	Pavir.Ea01978.1.p|PACid:30228217	0.6908	1.61417836086213	<.0001	7	AT3G06350.1	dehydroquinate dehydratase, putative / shikimate dehydrogenase, putative	Amino acid metabolism
RT1-SDT	1120	Pavir.J01954.1	30195549	Pavir.J01954.1.p|PACid:30195549	-0.2683	0.83029735065801	0.1403	4	AT3G06350.1	dehydroquinate dehydratase, putative / shikimate dehydrogenase, putative	Amino acid metabolism
RT1-SDT	1197	Pavir.J24113.1	30197853	Pavir.J24113.1.p|PACid:30197853	0.293	1.22518533190468	0.0919	2	AT3G06350.1	dehydroquinate dehydratase, putative / shikimate dehydrogenase, putative	Amino acid metabolism
RT1-SDT	5477	Pavir.J24360.1	30315531	Pavir.J24360.1.p|PACid:30315531	0.6602	1.5803016848737	<.0001	5	AT3G06350.1	dehydroquinate dehydratase, putative / shikimate dehydrogenase, putative	Amino acid metabolism
RT1-SDT	1191	Pavir.J36435.1	30195492	Pavir.J36435.1.p|PACid:30195492	0.4802	1.39493703228119	0.0112	2	AT3G06350.1	dehydroquinate dehydratase, putative / shikimate dehydrogenase, putative	Amino acid metabolism
RT1-SDT	1033	Pavir.J40751.1	30284409	Pavir.J40751.1.p|PACid:30284409	0.4451	1.36140847887396	0.0002	6	AT3G06350.1	dehydroquinate dehydratase, putative / shikimate dehydrogenase, putative	Amino acid metabolism
RT1-SDT	4429	Pavir.Ea01009.1	30227713	Pavir.Ea01009.1.p|PACid:30227713	0.7381	1.66797769904703	0.004	2	AT3G06850.1	2-oxoacid dehydrogenases acyltransferase family protein	Amino acid metabolism
RT1-SDT	3739	Pavir.Ba00316.1	30293567	Pavir.Ba00316.1.p|PACid:30293567	0.75465	1.68722221994122	<.0001	2	AT3G07630.1	arogenate dehydratase 2	Amino acid metabolism
RT1-SDT	3226	Pavir.Ib01332.1	30243042	Pavir.Ib01332.1.p|PACid:30243042	0.12588	1.09117311205224	0.0602	3	AT3G07630.1	arogenate dehydratase 2	Amino acid metabolism
RT1-SDT	2279	Pavir.Ib01592.1	30239329	Pavir.Ib01592.1.p|PACid:30239329	0.32433	1.25208282553569	<.0001	17	AT3G08860.1	PYRIMIDINE 4	Amino acid metabolism
RT1-SDT	1084	Pavir.J01494.1	30190056	Pavir.J01494.1.p|PACid:30190056	0.03318	1.02326513097163	0.4884	37	AT3G08860.1	PYRIMIDINE 4	Amino acid metabolism
RT1-SDT	2786	Pavir.Ia00865.1	30212180	Pavir.Ia00865.1.p|PACid:30212180	0.3171	1.24582376649987	0.1379	3	AT3G10050.1	L-O-methylthreonine resistant 1	Amino acid metabolism
RT1-SDT	2278	Pavir.J03222.1	30245569	Pavir.J03222.1.p|PACid:30245569	-0.1145	0.923702386113659	0.4664	3	AT3G10050.1	L-O-methylthreonine resistant 1	Amino acid metabolism
RT1-SDT	3059	Pavir.Bb00381.1	30299950	Pavir.Bb00381.1.p|PACid:30299950	0.69718	1.62133251512285	<.0001	10	AT3G13450.1	Transketolase family protein	Amino acid metabolism
RT1-SDT	2859	Pavir.Cb00208.1	30270236	Pavir.Cb00208.1.p|PACid:30270236	0.02025	1.01413520080331	0.9211	2	AT3G14390.1	Pyridoxal-dependent decarboxylase family protein	Amino acid metabolism
RT1-SDT	1999	Pavir.Gb00328.1	30221620	Pavir.Gb00328.1.p|PACid:30221620	-1.10574	0.464664070533589	<.0001	21	AT3G16150.1	N-terminal nucleophile aminohydrolases (Ntn hydrolases) superfamily protein	Amino acid metabolism
RT1-SDT	210	Pavir.Ga00286.1	30303791	Pavir.Ga00286.1.p|PACid:30303791	-0.46298	0.725486161221121	<.0001	8	AT3G19480.1	D-3-phosphoglycerate dehydrogenase	Amino acid metabolism
RT1-SDT	1619	Pavir.Fb00835.1	30278287	Pavir.Fb00835.1.p|PACid:30278287	0.42481	1.34239570035723	<.0001	13	AT3G22200.1	Pyridoxal phosphate (PLP)-dependent transferases superfamily protein	Amino acid metabolism
RT1-SDT	1770	Pavir.Ga00460.1	30305792	Pavir.Ga00460.1.p|PACid:30305792	0.7904	1.72955393031649	<.0001	7	AT3G22200.2	Pyridoxal phosphate (PLP)-dependent transferases superfamily protein	Amino acid metabolism
RT1-SDT	306	Pavir.Fa02358.1	30187553	Pavir.Fa02358.1.p|PACid:30187553	0.5709	1.48544995354759	0.0095	2	AT3G23810.1	S-adenosyl-l-homocysteine (SAH) hydrolase 2	Amino acid metabolism
RT1-SDT	4304	Pavir.Ib00785.1	30242798	Pavir.Ib00785.1.p|PACid:30242798	-0.05765	0.960827933991469	0.6188	3	AT3G25900.1	Homocysteine S-methyltransferase family protein	Amino acid metabolism
RT1-SDT	6084	Pavir.Cb00493.1	30269099	Pavir.Cb00493.1.p|PACid:30269099	0.1124	1.08102508428837	0.4496	3	AT3G26900.1	shikimate kinase like 1	Amino acid metabolism
RT1-SDT	2899	Pavir.Ca00568.1	30204915	Pavir.Ca00568.1.p|PACid:30204915	0.7299	1.65852412751229	<.0001	7	AT3G45300.1	isovaleryl-CoA-dehydrogenase	Amino acid metabolism
RT1-SDT	2586	Pavir.J03454.1	30200965	Pavir.J03454.1.p|PACid:30200965	1.4886	2.80616530998062	<.0001	3	AT3G45300.1	isovaleryl-CoA-dehydrogenase	Amino acid metabolism
RT1-SDT	1388	Pavir.Ia03597.1	30215019	Pavir.Ia03597.1.p|PACid:30215019	0.58136	1.49625907777671	<.0001	25	AT3G47340.1	glutamine-dependent asparagine synthase 1	Amino acid metabolism
RT1-SDT	1498	Pavir.Aa02172.1	30250812	Pavir.Aa02172.1.p|PACid:30250812	0.1697	1.12482455967633	0.0009	19	AT3G48560.1	chlorsulfuron/imidazolinone resistant 1	Amino acid metabolism
RT1-SDT	1917	Pavir.Ab01490.1	30234677	Pavir.Ab01490.1.p|PACid:30234677	0.17916	1.13222446285905	0.0031	15	AT3G48560.1	chlorsulfuron/imidazolinone resistant 1	Amino acid metabolism
RT1-SDT	5148	Pavir.J33902.1	30247443	Pavir.J33902.1.p|PACid:30247443	0.1628	1.11945768810875	0.1468	2	AT3G53580.1	diaminopimelate epimerase family protein	Amino acid metabolism
RT1-SDT	4021	Pavir.J33902.2	30247444	Pavir.J33902.2.p|PACid:30247444	-0.09012	0.939444605158614	0.4454	4	AT3G53580.1	diaminopimelate epimerase family protein	Amino acid metabolism
RT1-SDT	1727	Pavir.J34464.2	30200353	Pavir.J34464.2.p|PACid:30200353	0.17481	1.12881573228239	0.0012	27	AT3G53580.1	diaminopimelate epimerase family protein	Amino acid metabolism
RT1-SDT	1660	Pavir.J03220.1	30263949	Pavir.J03220.1.p|PACid:30263949	-0.2171	0.860292997578168	0.0465	6	AT3G54640.1	tryptophan synthase alpha chain	Amino acid metabolism
RT1-SDT	6923	Pavir.J02344.1	30272577	Pavir.J02344.1.p|PACid:30272577	0.6419	1.56038279910509	0.0061	2	AT3G55610.1	delta 1-pyrroline-5-carboxylate synthase 2	Amino acid metabolism
RT1-SDT	204	Pavir.Ca00973.1	30206033	Pavir.Ca00973.1.p|PACid:30206033	0.63195	1.54965815392865	<.0001	48	AT3G58610.1	ketol-acid reductoisomerase	Amino acid metabolism
RT1-SDT	186	Pavir.J20903.1	30284869	Pavir.J20903.1.p|PACid:30284869	0.34009	1.26583555843858	<.0001	56	AT3G58610.1	ketol-acid reductoisomerase	Amino acid metabolism
RT1-SDT	5439	Pavir.Da02210.1	30192817	Pavir.Da02210.1.p|PACid:30192817	0.2886	1.22145439565283	0.0424	4	AT3G59760.1	O-acetylserine (thiol) lyase isoform C	Amino acid metabolism
RT1-SDT	4704	Pavir.Db02228.1	30262053	Pavir.Db02228.1.p|PACid:30262053	0.08864	1.06336729456907	0.4548	4	AT3G59760.1	O-acetylserine (thiol) lyase isoform C	Amino acid metabolism
RT1-SDT	1452	Pavir.Ab01534.1	30235759	Pavir.Ab01534.1.p|PACid:30235759	0.237	1.17853940781168	<.0001	29	AT3G59890.1	Dihydrodipicolinate reductase, bacterial/plant	Amino acid metabolism
RT1-SDT	6575	Pavir.Db00968.1	30261483	Pavir.Db00968.1.p|PACid:30261483	1.4909	2.81064257476375	<.0001	2	AT3G60880.1	dihydrodipicolinate synthase 1	Amino acid metabolism
RT1-SDT	3014	Pavir.Da00288.1	30191887	Pavir.Da00288.1.p|PACid:30191887	0.3385	1.2644412444653	0.0104	3	AT3G60880.2	dihydrodipicolinate synthase 1	Amino acid metabolism
RT1-SDT	1976	Pavir.J08717.1	30282112	Pavir.J08717.1.p|PACid:30282112	0.06434	1.04560648929537	0.1818	29	AT3G61440.1	cysteine synthase C1	Amino acid metabolism
RT1-SDT	4100	Pavir.Cb00234.1	30267583	Pavir.Cb00234.1.p|PACid:30267583	0.75024	1.68207262896987	<.0001	7	AT3G63250.1	homocysteine methyltransferase 2	Amino acid metabolism
RT1-SDT	1669	Pavir.Bb00477.1	30301118	Pavir.Bb00477.1.p|PACid:30301118	-0.597	0.661127302571287	0.002	5	AT4G02610.1	Aldolase-type TIM barrel family protein	Amino acid metabolism
RT1-SDT	4216	Pavir.Ga00527.1	30304401	Pavir.Ga00527.1.p|PACid:30304401	0.11543	1.08329787790691	0.0896	13	AT4G11610.1	C2 calcium/lipid-binding plant phosphoribosyltransferase family protein	Amino acid metabolism
RT1-SDT	2698	Pavir.J04878.1	30307657	Pavir.J04878.1.p|PACid:30307657	1.1362	2.19801312335375	<.0001	3	AT4G11610.1	C2 calcium/lipid-binding plant phosphoribosyltransferase family protein	Amino acid metabolism
RT1-SDT	6222	Pavir.Gb01096.1	30223897	Pavir.Gb01096.1.p|PACid:30223897	1.1463	2.21345493334602	<.0001	2	AT4G11640.1	serine racemase	Amino acid metabolism
RT1-SDT	230	Pavir.Aa01024.1	30250051	Pavir.Aa01024.1.p|PACid:30250051	0.57431	1.48896516311658	<.0001	31	AT4G13940.1	S-adenosyl-L-homocysteine hydrolase	Amino acid metabolism
RT1-SDT	190	Pavir.Cb00088.1	30268965	Pavir.Cb00088.1.p|PACid:30268965	0.68013	1.60228412910889	<.0001	47	AT4G14880.1	O-acetylserine (thiol) lyase (OAS-TL) isoform A1	Amino acid metabolism
RT1-SDT	958	Pavir.J13435.1	30286175	Pavir.J13435.1.p|PACid:30286175	0.2313	1.17389225693556	0.0508	4	AT4G14880.1	O-acetylserine (thiol) lyase (OAS-TL) isoform A1	Amino acid metabolism
RT1-SDT	428	Pavir.J39478.1	30256098	Pavir.J39478.1.p|PACid:30256098	0.31	1.23970769993899	0.0167	3	AT4G14880.1	O-acetylserine (thiol) lyase (OAS-TL) isoform A1	Amino acid metabolism
RT1-SDT	1735	Pavir.Ia00224.2	30210355	Pavir.Ia00224.2.p|PACid:30210355	0.50093	1.41512549634352	<.0001	3	AT4G15940.1	Fumarylacetoacetate (FAA) hydrolase family	Amino acid metabolism
RT1-SDT	2190	Pavir.Ea01006.1	30230153	Pavir.Ea01006.1.p|PACid:30230153	0.4026	1.32188804913976	0.0006	7	AT4G19710.2	aspartate kinase-homoserine dehydrogenase ii	Amino acid metabolism
RT1-SDT	4194	Pavir.Db00371.1	30262621	Pavir.Db00371.1.p|PACid:30262621	1.5206	2.86910347453202	<.0001	6	AT4G20930.1	6-phosphogluconate dehydrogenase family protein	Amino acid metabolism
RT1-SDT	901	Pavir.Cb01811.1	30268702	Pavir.Cb01811.1.p|PACid:30268702	0.49164	1.40604230220196	<.0001	51	AT4G24830.1	arginosuccinate synthase family	Amino acid metabolism
RT1-SDT	1444	Pavir.Ib01082.1	30242558	Pavir.Ib01082.1.p|PACid:30242558	0.25391	1.19243448207637	<.0001	22	AT4G26900.1	HIS HF	Amino acid metabolism
RT1-SDT	1920	Pavir.J13601.1	30287494	Pavir.J13601.1.p|PACid:30287494	0.54438	1.45839346313174	<.0001	12	AT4G29840.1	Pyridoxal-5\'-phosphate-dependent enzyme family protein	Amino acid metabolism
RT1-SDT	748	Pavir.J05968.1	30197237	Pavir.J05968.1.p|PACid:30197237	0.1179	1.08515415212082	0.4865	4	AT4G29840.1	Pyridoxal-5\'-phosphate-dependent enzyme family protein	Amino acid metabolism
RT1-SDT	925	Pavir.Ab03171.1	30236513	Pavir.Ab03171.1.p|PACid:30236513	0.65708	1.5768877869141	<.0001	11	AT4G31990.1	aspartate aminotransferase 5	Amino acid metabolism
RT1-SDT	961	Pavir.J38063.1	30194920	Pavir.J38063.1.p|PACid:30194920	0.75559	1.68832190188103	<.0001	11	AT4G31990.1	aspartate aminotransferase 5	Amino acid metabolism
RT1-SDT	2765	Pavir.J01584.1	30281747	Pavir.J01584.1.p|PACid:30281747	0.8762	1.83553420605774	<.0001	12	AT4G33150.1	lysine-ketoglutarate reductase/saccharopine dehydrogenase bifunctional enzyme	Amino acid metabolism
RT1-SDT	5460	Pavir.J17816.1	30285619	Pavir.J17816.1.p|PACid:30285619	1.5026	2.83352906302373	<.0001	7	AT4G33150.1	lysine-ketoglutarate reductase/saccharopine dehydrogenase bifunctional enzyme	Amino acid metabolism
RT1-SDT	1070	Pavir.Ba00599.1	30289041	Pavir.Ba00599.1.p|PACid:30289041	0.5041	1.41823833706302	0.0003	3	AT4G33680.1	Pyridoxal phosphate (PLP)-dependent transferases superfamily protein	Amino acid metabolism
RT1-SDT	1069	Pavir.Bb03339.1	30297266	Pavir.Bb03339.1.p|PACid:30297266	0.8655	1.82197100480769	0.0055	2	AT4G33680.1	Pyridoxal phosphate (PLP)-dependent transferases superfamily protein	Amino acid metabolism
RT1-SDT	1694	Pavir.J35356.1	30306096	Pavir.J35356.1.p|PACid:30306096	1.04192	2.05896599038469	<.0001	25	AT4G34030.1	3-methylcrotonyl-CoA carboxylase	Amino acid metabolism
RT1-SDT	241	Pavir.J14758.1	30244007	Pavir.J14758.1.p|PACid:30244007	-0.8799	0.543405095928671	0.0004	2	AT4G34200.1	D-3-phosphoglycerate dehydrogenase	Amino acid metabolism
RT1-SDT	144	Pavir.Ia04266.1	30212722	Pavir.Ia04266.1.p|PACid:30212722	-0.01136	0.992156767954183	0.8098	30	AT4G35630.1	phosphoserine aminotransferase	Amino acid metabolism
RT1-SDT	159	Pavir.Ib00364.1	30238302	Pavir.Ib00364.1.p|PACid:30238302	-0.02474	0.982997736731528	0.7249	17	AT4G35630.1	phosphoserine aminotransferase	Amino acid metabolism
RT1-SDT	1457	Pavir.Db02471.1	30263062	Pavir.Db02471.1.p|PACid:30263062	0.23833	1.17962638745627	<.0001	28	AT4G38800.1	methylthioadenosine nucleosidase 1	Amino acid metabolism
RT1-SDT	2330	Pavir.Ib00459.1	30242272	Pavir.Ib00459.1.p|PACid:30242272	0.32823	1.25547212753103	<.0001	14	AT4G39660.1	alanine:glyoxylate aminotransferase 2	Amino acid metabolism
RT1-SDT	3905	Pavir.Ib03894.1	30239700	Pavir.Ib03894.1.p|PACid:30239700	-0.03301	0.977378991712402	0.7289	9	AT5G08100.1	N-terminal nucleophile aminohydrolases (Ntn hydrolases) superfamily protein	Amino acid metabolism
RT1-SDT	4549	Pavir.J16550.1	30201110	Pavir.J16550.1.p|PACid:30201110	0.74632	1.67750841089168	<.0001	9	AT5G09300.1	Thiamin diphosphate-binding fold (THDP-binding) superfamily protein	Amino acid metabolism
RT1-SDT	4423	Pavir.J30250.1	30218024	Pavir.J30250.1.p|PACid:30218024	0.78277	1.72043096162832	<.0001	7	AT5G10870.1	chorismate mutase 2	Amino acid metabolism
RT1-SDT	4273	Pavir.Ib01432.1	30237089	Pavir.Ib01432.1.p|PACid:30237089	0.505	1.41912335620038	0.0001	5	AT5G10920.1	L-Aspartase-like family protein	Amino acid metabolism
RT1-SDT	543	Pavir.Ea02781.1	30229981	Pavir.Ea02781.1.p|PACid:30229981	0.4492	1.36528297317539	0.0006	5	AT5G11520.1	aspartate aminotransferase 3	Amino acid metabolism
RT1-SDT	551	Pavir.Eb03232.1	30308980	Pavir.Eb03232.1.p|PACid:30308980	0.004656	1.00323250659041	0.9684	4	AT5G11520.1	aspartate aminotransferase 3	Amino acid metabolism
RT1-SDT	2548	Pavir.Cb00289.1	30268797	Pavir.Cb00289.1.p|PACid:30268797	0.18791	1.13911231348159	0.0002	13	AT5G11880.1	Pyridoxal-dependent decarboxylase family protein	Amino acid metabolism
RT1-SDT	1113	Pavir.Ga00359.1	30304216	Pavir.Ga00359.1.p|PACid:30304216	0.31038	1.24003427690745	<.0001	21	AT5G13780.1	Acyl-CoA N-acyltransferases (NAT) superfamily protein	Amino acid metabolism
RT1-SDT	3293	Pavir.Ea04002.1	30228230	Pavir.Ea04002.1.p|PACid:30228230	-0.1201	0.920123870287797	0.3056	4	AT5G14800.1	pyrroline-5- carboxylate (P5C) reductase	Amino acid metabolism
RT1-SDT	3153	Pavir.Eb03924.1	30311132	Pavir.Eb03924.1.p|PACid:30311132	-0.1978	0.8718790992674	0.0881	5	AT5G14800.1	pyrroline-5- carboxylate (P5C) reductase	Amino acid metabolism
RT1-SDT	915	Pavir.J29377.1	30255147	Pavir.J29377.1.p|PACid:30255147	0.6039	1.51981950688981	<.0001	21	AT5G17330.1	glutamate decarboxylase	Amino acid metabolism
RT1-SDT	1322	Pavir.Fa00915.1	30186533	Pavir.Fa00915.1.p|PACid:30186533	2.4586	5.49683052595865	<.0001	4	AT5G17330.1	glutamate decarboxylase	Amino acid metabolism
RT1-SDT	91	Pavir.Cb00079.1	30268421	Pavir.Cb00079.1.p|PACid:30268421	0.72328	1.65093120066006	<.0001	65	AT5G17920.1	Cobalamin-independent synthase family protein	Amino acid metabolism
RT1-SDT	75	Pavir.Ia01108.1	30210813	Pavir.Ia01108.1.p|PACid:30210813	0.99706	1.99592844460245	<.0001	26	AT5G17920.1	Cobalamin-independent synthase family protein	Amino acid metabolism
RT1-SDT	100	Pavir.Ib04158.1	30238750	Pavir.Ib04158.1.p|PACid:30238750	0.78702	1.72550660952034	<.0001	16	AT5G17920.1	Cobalamin-independent synthase family protein	Amino acid metabolism
RT1-SDT	291	Pavir.J40629.1	30294248	Pavir.J40629.1.p|PACid:30294248	1.0916	2.13110252313459	<.0001	3	AT5G17920.1	Cobalamin-independent synthase family protein	Amino acid metabolism
RT1-SDT	737	Pavir.J22701.1	30315152	Pavir.J22701.1.p|PACid:30315152	0.14341	1.10451269440741	0.1155	10	AT5G17990.1	tryptophan biosynthesis 1	Amino acid metabolism
RT1-SDT	715	Pavir.J39506.1	30190908	Pavir.J39506.1.p|PACid:30190908	0.25614	1.19427907501589	<.0001	18	AT5G17990.1	tryptophan biosynthesis 1	Amino acid metabolism
RT1-SDT	2739	Pavir.J14857.1	30218560	Pavir.J14857.1.p|PACid:30218560	0.3856	1.30640299185512	0.0185	3	AT5G21060.1	Glyceraldehyde-3-phosphate dehydrogenase-like family protein	Amino acid metabolism
RT1-SDT	3396	Pavir.J39903.1	30274746	Pavir.J39903.1.p|PACid:30274746	0.2567	1.19474273925583	0.0322	6	AT5G21060.2	Glyceraldehyde-3-phosphate dehydrogenase-like family protein	Amino acid metabolism
RT1-SDT	1127	Pavir.Da00434.1	30194088	Pavir.Da00434.1.p|PACid:30194088	0.78499	1.7230803758996	<.0001	28	AT5G38530.1	tryptophan synthase beta type 2	Amino acid metabolism
RT1-SDT	2266	Pavir.Ia01160.1	30214267	Pavir.Ia01160.1.p|PACid:30214267	0.99231	1.98936775806594	<.0001	8	AT5G46180.1	ornithine-delta-aminotransferase	Amino acid metabolism
RT1-SDT	2972	Pavir.J12790.1	30248522	Pavir.J12790.1.p|PACid:30248522	1.1109	2.15980340831292	<.0001	7	AT5G46180.1	ornithine-delta-aminotransferase	Amino acid metabolism
RT1-SDT	3175	Pavir.Bb00976.1	30301291	Pavir.Bb00976.1.p|PACid:30301291	0.06935	1.04924384484503	0.393	10	AT5G48220.1	Aldolase-type TIM barrel family protein	Amino acid metabolism
RT1-SDT	5224	Pavir.Ga01416.1	30305026	Pavir.Ga01416.1.p|PACid:30305026	0.03116	1.02183340138105	0.8265	3	AT5G48220.1	Aldolase-type TIM barrel family protein	Amino acid metabolism
RT1-SDT	4569	Pavir.Ea01153.1	30231269	Pavir.Ea01153.1.p|PACid:30231269	-0.04525	0.969121866361355	0.8155	3	AT5G49810.1	methionine S-methyltransferase	Amino acid metabolism
RT1-SDT	5921	Pavir.Ab01649.1	30232879	Pavir.Ab01649.1.p|PACid:30232879	0.4566	1.37230389507354	0.009	2	AT5G53970.1	Tyrosine transaminase family protein	Amino acid metabolism
RT1-SDT	3703	Pavir.Da02439.1	30193736	Pavir.Da02439.1.p|PACid:30193736	1.7172	3.28797652791851	<.0001	8	AT5G54080.1	homogentisate 1,2-dioxygenase	Amino acid metabolism
RT1-SDT	1087	Pavir.J40578.1	30208865	Pavir.J40578.1.p|PACid:30208865	-0.09329	0.937382651716631	0.0379	41	AT5G54810.1	tryptophan synthase beta-subunit 1	Amino acid metabolism
RT1-SDT	3481	Pavir.Ca01881.1	30206511	Pavir.Ca01881.1.p|PACid:30206511	-0.01754	0.987915805918575	0.7901	10	AT5G56760.1	serine acetyltransferase 1;1	Amino acid metabolism
RT1-SDT	4700	Pavir.J08783.1	30306132	Pavir.J08783.1.p|PACid:30306132	0.3213	1.24945591569509	0.034	4	AT5G57890.1	Glutamine amidotransferase type 1 family protein	Amino acid metabolism
RT1-SDT	579	Pavir.Ca01745.2	30204063	Pavir.Ca01745.2.p|PACid:30204063	1.20079	2.29865507739619	<.0001	13	AT5G62530.1	aldehyde dehydrogenase 12A1	Amino acid metabolism
RT1-SDT	2473	Pavir.Ia00498.1	30212379	Pavir.Ia00498.1.p|PACid:30212379	0.24893	1.18832544574786	0.0097	6	AT5G63890.2	histidinol dehydrogenase	Amino acid metabolism
RT1-SDT	1117	Pavir.J23086.1	30245667	Pavir.J23086.1.p|PACid:30245667	0.70817	1.63373048154334	<.0001	5	AT5G65720.1	nitrogen fixation S (NIFS)-like 1	Amino acid metabolism
RT1-SDT	1056	Pavir.Bb02078.1	30297355	Pavir.Bb02078.1.p|PACid:30297355	0.4339	1.35088044539319	<.0001	9	AT5G65720.1	nitrogen fixation S (NIFS)-like 1	Amino acid metabolism
RT1-SDT	3078	Pavir.Ia04813.1	30214900	Pavir.Ia04813.1.p|PACid:30214900	0.01604	1.01118011632852	0.9265	3	AT5G65780.1	branched-chain amino acid aminotransferase 5 / branched-chain amino acid transaminase 5 (BCAT5)	Amino acid metabolism
RT1-SDT	1350	Pavir.Ib02399.1	30238984	Pavir.Ib02399.1.p|PACid:30238984	0.26607	1.20252759448551	<.0001	26	AT5G65780.1	branched-chain amino acid aminotransferase 5 / branched-chain amino acid transaminase 5 (BCAT5)	Amino acid metabolism
RT1-SDT	1605	Pavir.Ba01208.1	30292713	Pavir.Ba01208.1.p|PACid:30292713	0.2036	1.15156831555085	0.2164	2	AT5G66120.2	3-dehydroquinate synthase, putative	Amino acid metabolism
RT1-SDT	1524	Pavir.Bb02679.1	30297576	Pavir.Bb02679.1.p|PACid:30297576	0.09478	1.0679025486298	0.4994	3	AT5G66120.2	3-dehydroquinate synthase, putative	Amino acid metabolism
RT1-SDT	2139	Pavir.Ea02862.1	30228095	Pavir.Ea02862.1.p|PACid:30228095	0.46692	1.38215556142511	<.0001	17	AT1G06550.1	ATP-dependent caseinolytic (Clp) protease/crotonase family protein	Amino acid metabolism
RT1-SDT	728	Pavir.Db01616.1	30262505	Pavir.Db01616.1.p|PACid:30262505	0.90306	1.87002816617076	<.0001	26	AT4G13360.1	ATP-dependent caseinolytic (Clp) protease/crotonase family protein	Amino acid metabolism
RT1-SDT	3044	Pavir.J32099.1	30272569	Pavir.J32099.1.p|PACid:30272569	0.4552	1.37097284899953	0.0162	2	AT4G13360.1	ATP-dependent caseinolytic (Clp) protease/crotonase family protein	Amino acid metabolism
RT1-SDT	2728	Pavir.J00363.1	30208629	Pavir.J00363.1.p|PACid:30208629	0.40576	1.32478661340763	<.0001	11	AT4G14430.1	indole-3-butyric acid response 10	Amino acid metabolism
RT1-SDT	5592	Pavir.Aa01091.1	30250157	Pavir.Aa01091.1.p|PACid:30250157	0.7844	1.72237585446923	<.0001	2	AT4G16800.1	ATP-dependent caseinolytic (Clp) protease/crotonase family protein	Amino acid metabolism
RT1-SDT	1680	Pavir.Ib02204.1	30241074	Pavir.Ib02204.1.p|PACid:30241074	-0.15614	0.897422959974436	0.0468	21	AT4G31810.1	ATP-dependent caseinolytic (Clp) protease/crotonase family protein	Amino acid metabolism
RT1-SDT	822	Pavir.Gb00458.2	30222944	Pavir.Gb00458.2.p|PACid:30222944	0.41758	1.33568517469023	<.0001	61	AT1G11860.1	Glycine cleavage T-protein family	Amino acid metabolism
RT1-SDT	720	Pavir.Ga00544.1	30303723	Pavir.Ga00544.1.p|PACid:30303723	0.1274	1.09232336010766	0.3084	11	AT1G80560.1	isopropylmalate dehydrogenase 2	Amino acid metabolism
RT1-SDT	695	Pavir.Gb00202.1	30223128	Pavir.Gb00202.1.p|PACid:30223128	0.19583	1.14538292380704	0.0174	10	AT1G80560.1	isopropylmalate dehydrogenase 2	Amino acid metabolism
RT1-SDT	3998	Pavir.Ia03985.1	30215864	Pavir.Ia03985.1.p|PACid:30215864	-0.6314	0.645549665964022	<.0001	7	AT3G49680.2	branched-chain aminotransferase 3	Amino acid metabolism
RT1-SDT	3018	Pavir.J06963.1	30198036	Pavir.J06963.1.p|PACid:30198036	0.61973	1.53658758241221	<.0001	7	AT1G66200.1	glutamine synthase clone F11	Ammonia metabolism
RT1-SDT	5894	Pavir.Aa00599.1	30249169	Pavir.Aa00599.1.p|PACid:30249169	1.1328	2.19283916404689	<.0001	2	AT2G15620.1	nitrite reductase 1	Ammonia metabolism
RT1-SDT	4856	Pavir.Fb01070.1	30278427	Pavir.Fb01070.1.p|PACid:30278427	-0.03372	0.976898108132172	0.6981	5	AT4G25840.1	glycerol-3-phosphatase 1	Ammonia metabolism
RT1-SDT	1240	Pavir.Bb03571.1	30297059	Pavir.Bb03571.1.p|PACid:30297059	1.1104	2.15905500718693	<.0001	4	AT5G04140.1	glutamate synthase 1	Ammonia metabolism
RT1-SDT	1147	Pavir.Ga00655.1	30304543	Pavir.Ga00655.1.p|PACid:30304543	0.6022	1.5180296819867	0.0012	2	AT5G07440.1	glutamate dehydrogenase 2	Ammonia metabolism
RT1-SDT	1017	Pavir.Gb01193.1	30223434	Pavir.Gb01193.1.p|PACid:30223434	0.4988	1.4130377416788	<.0001	5	AT5G07440.1	glutamate dehydrogenase 2	Ammonia metabolism
RT1-SDT	680	Pavir.J00062.1	30294440	Pavir.J00062.1.p|PACid:30294440	0.50372	1.41786482805177	<.0001	37	AT5G18170.1	glutamate dehydrogenase 1	Ammonia metabolism
RT1-SDT	4829	Pavir.J34265.1	30219720	Pavir.J34265.1.p|PACid:30219720	0.04949	1.03489901712895	0.6789	4	AT5G35630.1	glutamine synthetase 2	Ammonia metabolism
RT1-SDT	438	Pavir.Aa00420.1	30251486	Pavir.Aa00420.1.p|PACid:30251486	0.4501	1.36613494673131	<.0001	100	AT5G37600.1	glutamine synthase clone R1	Ammonia metabolism
RT1-SDT	3825	Pavir.Ib00795.1	30240552	Pavir.Ib00795.1.p|PACid:30240552	-1.3254	0.399038540863552	<.0001	9	AT5G37600.1	glutamine synthase clone R1	Ammonia metabolism
RT1-SDT	2081	Pavir.Ea02397.1	30229402	Pavir.Ea02397.1.p|PACid:30229402	0.3095	1.23927812443458	0.0083	4	AT5G53460.1	NADH-dependent glutamate synthase 1	Ammonia metabolism
RT1-SDT	1779	Pavir.Eb02761.1	30314029	Pavir.Eb02761.1.p|PACid:30314029	0.22399	1.16795929890811	0.0046	11	AT5G53460.1	NADH-dependent glutamate synthase 1	Ammonia metabolism
RT1-SDT	1089	Pavir.Eb00683.1	30312032	Pavir.Eb00683.1.p|PACid:30312032	0.64076	1.55915029069668	<.0001	6	AT1G50480.1	10-formyltetrahydrofolate synthetase	Carbohydrates metabolism
RT1-SDT	1143	Pavir.J10264.1	30287219	Pavir.J10264.1.p|PACid:30287219	0.8146	1.75881043843794	<.0001	5	AT1G50480.1	10-formyltetrahydrofolate synthetase	Carbohydrates metabolism
RT1-SDT	4368	Pavir.Hb00840.1	30264520	Pavir.Hb00840.1.p|PACid:30264520	0.36572	1.2885245278155	<.0001	12	AT2G16370.1	thymidylate synthase 1	Carbohydrates metabolism
RT1-SDT	6681	Pavir.Ba02895.1	30293925	Pavir.Ba02895.1.p|PACid:30293925	0.1982	1.14726605804922	0.1975	2	AT2G38660.1	Amino acid dehydrogenase family protein	Carbohydrates metabolism
RT1-SDT	1800	Pavir.Ea04015.1	30229764	Pavir.Ea04015.1.p|PACid:30229764	0.6872	1.61015547471639	<.0001	4	AT2G41530.1	S-formylglutathione hydrolase	Carbohydrates metabolism
RT1-SDT	1026	Pavir.Eb03909.1	30313879	Pavir.Eb03909.1.p|PACid:30313879	0.37428	1.29619250763373	<.0001	19	AT2G41530.1	S-formylglutathione hydrolase	Carbohydrates metabolism
RT1-SDT	1189	Pavir.Ia00159.1	30212741	Pavir.Ia00159.1.p|PACid:30212741	0.91232	1.88206962513497	<.0001	17	AT2G44160.1	methylenetetrahydrofolate reductase 2	Carbohydrates metabolism
RT1-SDT	1402	Pavir.J04665.1	30218128	Pavir.J04665.1.p|PACid:30218128	0.92143	1.8939916888043	<.0001	16	AT2G44160.1	methylenetetrahydrofolate reductase 2	Carbohydrates metabolism
RT1-SDT	5998	Pavir.Fa00199.1	30186575	Pavir.Fa00199.1.p|PACid:30186575	-0.208	0.865736565519658	0.321	2	AT3G11750.1	Dihydroneopterin aldolase	Carbohydrates metabolism
RT1-SDT	1282	Pavir.J29074.1	30220792	Pavir.J29074.1.p|PACid:30220792	0.24671	1.18649827248367	0.0002	13	AT3G12290.1	Amino acid dehydrogenase family protein	Carbohydrates metabolism
RT1-SDT	2257	Pavir.J35031.1	30195873	Pavir.J35031.1.p|PACid:30195873	0.21884	1.16379745797647	0.0003	11	AT3G12290.1	Amino acid dehydrogenase family protein	Carbohydrates metabolism
RT1-SDT	3636	Pavir.J40042.1	30245410	Pavir.J40042.1.p|PACid:30245410	0.1884	1.13949926971051	0.1344	4	AT3G12290.1	Amino acid dehydrogenase family protein	Carbohydrates metabolism
RT1-SDT	1784	Pavir.Aa03482.1	30249693	Pavir.Aa03482.1.p|PACid:30249693	-0.05329	0.963736065097397	0.6098	4	AT4G00620.1	Amino acid dehydrogenase family protein	Carbohydrates metabolism
RT1-SDT	1446	Pavir.J12567.1	30307409	Pavir.J12567.1.p|PACid:30307409	0.16521	1.12132928785895	0.0069	7	AT4G00620.1	Amino acid dehydrogenase family protein	Carbohydrates metabolism
RT1-SDT	4594	Pavir.Aa01085.1	30253749	Pavir.Aa01085.1.p|PACid:30253749	0.28814	1.22106499980667	0.0018	7	AT4G10760.1	mRNAadenosine methylase	Carbohydrates metabolism
RT1-SDT	1138	Pavir.Cb00991.1	30267881	Pavir.Cb00991.1.p|PACid:30267881	0.60195	1.5177666502788	<.0001	6	AT4G13930.1	serine hydroxymethyltransferase 4	Carbohydrates metabolism
RT1-SDT	536	Pavir.J07098.1	30225237	Pavir.J07098.1.p|PACid:30225237	0.43888	1.35555157050076	<.0001	7	AT4G13930.1	serine hydroxymethyltransferase 4	Carbohydrates metabolism
RT1-SDT	286	Pavir.J38901.1	30199700	Pavir.J38901.1.p|PACid:30199700	0.60214	1.51796655021986	<.0001	38	AT4G13930.1	serine hydroxymethyltransferase 4	Carbohydrates metabolism
RT1-SDT	3838	Pavir.J34644.1	30271604	Pavir.J34644.1.p|PACid:30271604	0.1271	1.09209624146528	0.3834	5	AT4G31120.1	SHK1 binding protein 1	Carbohydrates metabolism
RT1-SDT	439	Pavir.Ia00634.1	30209499	Pavir.Ia00634.1.p|PACid:30209499	0.4303	1.34751375534203	0.0009	11	AT4G37930.1	serine transhydroxymethyltransferase 1	Carbohydrates metabolism
RT1-SDT	381	Pavir.J05875.1	30190514	Pavir.J05875.1.p|PACid:30190514	0.48266	1.39731762714123	<.0001	18	AT4G37930.1	serine transhydroxymethyltransferase 1	Carbohydrates metabolism
RT1-SDT	2277	Pavir.Ia04781.1	30210328	Pavir.Ia04781.1.p|PACid:30210328	0.55069	1.46478609396435	<.0001	17	AT5G05980.2	DHFS-FPGS homolog B	Carbohydrates metabolism
RT1-SDT	3901	Pavir.Ba00554.1	30291130	Pavir.Ba00554.1.p|PACid:30291130	0.62981	1.54736119580328	<.0001	5	AT5G13050.1	5-formyltetrahydrofolate cycloligase	Carbohydrates metabolism
RT1-SDT	2174	Pavir.Da01109.1	30192598	Pavir.Da01109.1.p|PACid:30192598	1.1134	2.16354930705709	<.0001	5	AT5G14780.1	formate dehydrogenase	Carbohydrates metabolism
RT1-SDT	774	Pavir.J06234.1	30307099	Pavir.J06234.1.p|PACid:30307099	1.02	2.02791895958006	<.0001	3	AT5G14780.1	formate dehydrogenase	Carbohydrates metabolism
RT1-SDT	2202	Pavir.Ea00579.1	30229147	Pavir.Ea00579.1.p|PACid:30229147	0.13035	1.09455921077375	0.1241	11	AT5G16450.1	Ribonuclease E inhibitor RraA/Dimethylmenaquinone methyltransferase	Carbohydrates metabolism
RT1-SDT	692	Pavir.Bb03739.1	30299359	Pavir.Bb03739.1.p|PACid:30299359	0.2889	1.22170841636414	<.0001	57	AT5G16450.1	Ribonuclease E inhibitor RraA/Dimethylmenaquinone methyltransferase	Carbohydrates metabolism
RT1-SDT	2127	Pavir.J00936.1	30275789	Pavir.J00936.1.p|PACid:30275789	0.16557	1.12160913141697	0.002	16	AT1G01940.1	Cyclophilin-like peptidyl-prolyl cis-trans isomerase family protein	Cell division & Cell cycle
RT1-SDT	2267	Pavir.Ba03470.1	30288902	Pavir.Ba03470.1.p|PACid:30288902	0.3218	1.24988901916447	0.0216	3	AT1G03860.1	prohibitin 2	Cell division & Cell cycle
RT1-SDT	5121	Pavir.Eb01868.1	30310911	Pavir.Eb01868.1.p|PACid:30310911	-0.4009	0.757385654092162	0.0312	5	AT1G17130.1	Family of unknown function (DUF572)	Cell division & Cell cycle
RT1-SDT	3351	Pavir.Gb00127.1	30222382	Pavir.Gb00127.1.p|PACid:30222382	0.0786	1.05599280138652	0.2827	13	AT1G19880.1	Regulator of chromosome condensation (RCC1) family protein	Cell division & Cell cycle
RT1-SDT	5615	Pavir.Ia00027.1	30211131	Pavir.Ia00027.1.p|PACid:30211131	1.0674	2.09565321210417	0.0074	2	AT1G24490.1	OxaA/YidC-like membrane insertion protein	Cell division & Cell cycle
RT1-SDT	1572	Pavir.Bb02160.1	30298465	Pavir.Bb02160.1.p|PACid:30298465	-0.15838	0.896030657657391	0.0324	26	AT1G26550.1	FKBP-like peptidyl-prolyl cis-trans isomerase family protein	Cell division & Cell cycle
RT1-SDT	3959	Pavir.J24544.1	30270609	Pavir.J24544.1.p|PACid:30270609	0.02484	1.01736685625097	0.8987	5	AT1G26550.1	FKBP-like peptidyl-prolyl cis-trans isomerase family protein	Cell division & Cell cycle
RT1-SDT	4707	Pavir.J20623.1	30281443	Pavir.J20623.1.p|PACid:30281443	0.1247	1.09028099153274	0.2397	7	AT1G26940.1	Cyclophilin-like peptidyl-prolyl cis-trans isomerase family protein	Cell division & Cell cycle
RT1-SDT	3545	Pavir.Da00199.1	30194556	Pavir.Da00199.1.p|PACid:30194556	-0.6466	0.638783963568843	0.0071	4	AT1G53720.1	cyclophilin 59	Cell division & Cell cycle
RT1-SDT	4744	Pavir.Gb00137.1	30221834	Pavir.Gb00137.1.p|PACid:30221834	-0.4631	0.725425819488235	0.0518	5	AT1G70620.1	cyclin-related	Cell division & Cell cycle
RT1-SDT	4559	Pavir.J05916.1	30258242	Pavir.J05916.1.p|PACid:30258242	0.2657	1.20221922844335	0.0209	4	AT1G73690.1	cyclin-dependent kinase D1;1	Cell division & Cell cycle
RT1-SDT	4788	Pavir.Eb00101.1	30312920	Pavir.Eb00101.1.p|PACid:30312920	-0.911	0.531816336446592	0.0003	3	AT1G78650.1	DNA-directed DNA polymerases	Cell division & Cell cycle
RT1-SDT	5555	Pavir.J26307.1	30257497	Pavir.J26307.1.p|PACid:30257497	-0.3667	0.775554461596908	0.2068	2	AT1G78650.1	DNA-directed DNA polymerases	Cell division & Cell cycle
RT1-SDT	6605	Pavir.Ea00375.1	30231518	Pavir.Ea00375.1.p|PACid:30231518	-0.6551	0.635031472716358	0.0194	2	AT1G78650.1	DNA-directed DNA polymerases	Cell division & Cell cycle
RT1-SDT	1799	Pavir.Db01834.1	30262141	Pavir.Db01834.1.p|PACid:30262141	-0.1959	0.873028102733362	0.009	12	AT2G15790.1	peptidyl-prolyl cis-trans isomerase / cyclophilin-40 (CYP40) / rotamase	Cell division & Cell cycle
RT1-SDT	5388	Pavir.Ia04488.1	30209777	Pavir.Ia04488.1.p|PACid:30209777	0.1527	1.11164797278375	0.4601	2	AT2G17510.1	ribonuclease II family protein	Cell division & Cell cycle
RT1-SDT	3054	Pavir.Ga00153.1	30303711	Pavir.Ga00153.1.p|PACid:30303711	-0.50033	0.70694505708985	<.0001	9	AT2G18040.1	peptidylprolyl cis/trans isomerase, NIMA-interacting 1	Cell division & Cell cycle
RT1-SDT	3467	Pavir.J20766.1	30285915	Pavir.J20766.1.p|PACid:30285915	0.02738	1.01915960375673	0.7644	7	AT2G18040.1	peptidylprolyl cis/trans isomerase, NIMA-interacting 1	Cell division & Cell cycle
RT1-SDT	2269	Pavir.Gb01282.1	30224357	Pavir.Gb01282.1.p|PACid:30224357	0.1471	1.10734133687678	0.3044	5	AT2G20190.1	CLIP-associated protein	Cell division & Cell cycle
RT1-SDT	27	Pavir.Aa01886.1	30249319	Pavir.Aa01886.1.p|PACid:30249319	0.15773	1.11553053154046	<.0001	92	AT2G21130.1	Cyclophilin-like peptidyl-prolyl cis-trans isomerase family protein	Cell division & Cell cycle
RT1-SDT	81	Pavir.J10928.1	30314682	Pavir.J10928.1.p|PACid:30314682	0.22939	1.17233915623943	<.0001	92	AT2G21130.1	Cyclophilin-like peptidyl-prolyl cis-trans isomerase family protein	Cell division & Cell cycle
RT1-SDT	15	Pavir.J17765.1	30284099	Pavir.J17765.1.p|PACid:30284099	-0.0444	0.969693017074618	0.1067	102	AT2G21130.1	Cyclophilin-like peptidyl-prolyl cis-trans isomerase family protein	Cell division & Cell cycle
RT1-SDT	10	Pavir.Ab01315.1	30235262	Pavir.Ab01315.1.p|PACid:30235262	0.4686	1.38376600145881	0.0581	2	AT2G21130.1	Cyclophilin-like peptidyl-prolyl cis-trans isomerase family protein	Cell division & Cell cycle
RT1-SDT	2455	Pavir.J00009.1	30246339	Pavir.J00009.1.p|PACid:30246339	0.58131	1.49620722228725	<.0001	5	AT2G27170.1	Structural maintenance of chromosomes (SMC) family protein	Cell division & Cell cycle
RT1-SDT	2701	Pavir.Ca01055.1	30207049	Pavir.Ca01055.1.p|PACid:30207049	0.6276	1.54499267697956	0.001	3	AT2G27170.1	Structural maintenance of chromosomes (SMC) family protein	Cell division & Cell cycle
RT1-SDT	4237	Pavir.Ib00276.1	30240098	Pavir.Ib00276.1.p|PACid:30240098	-0.48755	0.71323529365452	<.0001	6	AT2G27960.1	cyclin-dependent kinase-subunit 1	Cell division & Cell cycle
RT1-SDT	354	Pavir.J00040.1	30196781	Pavir.J00040.1.p|PACid:30196781	-0.08749	0.941158753097821	<.0001	119	AT2G29960.1	cyclophilin 5	Cell division & Cell cycle
RT1-SDT	5876	Pavir.Fa00169.1	30186150	Pavir.Fa00169.1.p|PACid:30186150	0.007415	1.00515291718946	0.9228	4	AT2G36130.1	Cyclophilin-like peptidyl-prolyl cis-trans isomerase family protein	Cell division & Cell cycle
RT1-SDT	847	Pavir.J15791.1	30307123	Pavir.J15791.1.p|PACid:30307123	0.06362	1.04508479286984	0.4371	6	AT2G36250.1	Tubulin/FtsZ family protein	Cell division & Cell cycle
RT1-SDT	2611	Pavir.J00148.2	30244795	Pavir.J00148.2.p|PACid:30244795	-0.04019	0.972526859170404	0.7646	4	AT2G38730.1	Cyclophilin-like peptidyl-prolyl cis-trans isomerase family protein	Cell division & Cell cycle
RT1-SDT	2802	Pavir.J01598.1	30216145	Pavir.J01598.1.p|PACid:30216145	-0.21256	0.863004507632412	0.0385	2	AT2G38730.1	Cyclophilin-like peptidyl-prolyl cis-trans isomerase family protein	Cell division & Cell cycle
RT1-SDT	7567	Pavir.Ea00820.1	30229657	Pavir.Ea00820.1.p|PACid:30229657	0.27867	1.21307605123064	0.0189	2	AT2G47320.1	Cyclophilin-like peptidyl-prolyl cis-trans isomerase family protein	Cell division & Cell cycle
RT1-SDT	3987	Pavir.J37803.1	30294102	Pavir.J37803.1.p|PACid:30294102	0.15433	1.11290465569175	0.0627	7	AT3G01800.1	Ribosome recycling factor	Cell division & Cell cycle
RT1-SDT	5258	Pavir.Bb02004.1	30297236	Pavir.Bb02004.1.p|PACid:30297236	-0.01019	0.992961715788915	0.9276	4	AT3G10530.1	Transducin/WD40 repeat-like superfamily protein	Cell division & Cell cycle
RT1-SDT	1547	Pavir.Ga01997.1	30305334	Pavir.Ga01997.1.p|PACid:30305334	-0.6307	0.645862964616215	0.0115	2	AT3G11450.1	DnaJ domain ;Myb-like DNA-binding domain	Cell division & Cell cycle
RT1-SDT	2231	Pavir.Ia04593.1	30209287	Pavir.Ia04593.1.p|PACid:30209287	-0.4588	0.727591200384063	0.0564	3	AT3G11450.1	DnaJ domain ;Myb-like DNA-binding domain	Cell division & Cell cycle
RT1-SDT	2243	Pavir.Ia02985.1	30214505	Pavir.Ia02985.1.p|PACid:30214505	0.21898	1.16391039906606	0.001	14	AT3G19590.1	Transducin/WD40 repeat-like superfamily protein	Cell division & Cell cycle
RT1-SDT	781	Pavir.Ba01624.1	30293695	Pavir.Ba01624.1.p|PACid:30293695	-0.39595	0.759988766947893	<.0001	25	AT3G25220.1	FK506-binding protein 15 kD-1	Cell division & Cell cycle
RT1-SDT	2328	Pavir.J05532.1	30276965	Pavir.J05532.1.p|PACid:30276965	-0.59643	0.661388561538488	<.0001	11	AT3G25220.1	FK506-binding protein 15 kD-1	Cell division & Cell cycle
RT1-SDT	470	Pavir.Fa00397.1	30185460	Pavir.Fa00397.1.p|PACid:30185460	-0.8356	0.560349947555843	<.0001	20	AT3G25230.1	rotamase FKBP 1	Cell division & Cell cycle
RT1-SDT	427	Pavir.Fb01976.1	30278006	Pavir.Fb01976.1.p|PACid:30278006	-0.82762	0.563458007249779	<.0001	21	AT3G25230.1	rotamase FKBP 1	Cell division & Cell cycle
RT1-SDT	4226	Pavir.Aa02344.1	30250776	Pavir.Aa02344.1.p|PACid:30250776	-0.4264	0.744116286137296	0.0327	3	AT3G25230.2	rotamase FKBP 1	Cell division & Cell cycle
RT1-SDT	2736	Pavir.Ab01303.1	30235130	Pavir.Ab01303.1.p|PACid:30235130	-0.2698	0.829434521884784	0.0601	6	AT3G25230.2	rotamase FKBP 1	Cell division & Cell cycle
RT1-SDT	1705	Pavir.Gb02023.1	30221746	Pavir.Gb02023.1.p|PACid:30221746	-0.6341	0.644342651265386	0.0003	4	AT3G25230.2	rotamase FKBP 1	Cell division & Cell cycle
RT1-SDT	5233	Pavir.J13426.1	30294491	Pavir.J13426.1.p|PACid:30294491	-1.2584	0.41800728765976	<.0001	3	AT3G25980.1	DNA-binding HORMA family protein	Cell division & Cell cycle
RT1-SDT	3903	Pavir.Ib00039.1	30239236	Pavir.Ib00039.1.p|PACid:30239236	0.24225	1.18283595233724	0.0063	5	AT3G48750.1	cell division control 2	Cell division & Cell cycle
RT1-SDT	939	Pavir.J08324.1	30190464	Pavir.J08324.1.p|PACid:30190464	-0.7814	0.581801935088342	<.0001	13	AT3G52750.1	Tubulin/FtsZ family protein	Cell division & Cell cycle
RT1-SDT	1490	Pavir.Fa01615.1	30186765	Pavir.Fa01615.1.p|PACid:30186765	-0.7627	0.589392251837118	<.0001	20	AT3G53230.1	ATPase, AAA-type, CDC48 protein	Cell division & Cell cycle
RT1-SDT	2876	Pavir.Ia03298.1	30214985	Pavir.Ia03298.1.p|PACid:30214985	-0.10137	0.932147393103835	0.168	13	AT3G54010.1	FKBP-type peptidyl-prolyl cis-trans isomerase family protein	Cell division & Cell cycle
RT1-SDT	4302	Pavir.J22885.1	30270600	Pavir.J22885.1.p|PACid:30270600	-0.1253	0.916813377399145	0.4202	4	AT3G54010.1	FKBP-type peptidyl-prolyl cis-trans isomerase family protein	Cell division & Cell cycle
RT1-SDT	2605	Pavir.Fa00070.1	30186971	Pavir.Fa00070.1.p|PACid:30186971	0.39099	1.31129292499421	0.0001	8	AT3G54670.3	Structural maintenance of chromosomes (SMC) family protein	Cell division & Cell cycle
RT1-SDT	718	Pavir.Ba02794.1	30292790	Pavir.Ba02794.1.p|PACid:30292790	0.1292	1.09368706419681	0.4956	2	AT3G56070.1	rotamase cyclophilin 2	Cell division & Cell cycle
RT1-SDT	6594	Pavir.Ia03718.1	30209110	Pavir.Ia03718.1.p|PACid:30209110	0.82864	1.77601036321972	<.0001	2	AT3G57090.1	Tetratricopeptide repeat (TPR)-like superfamily protein	Cell division & Cell cycle
RT1-SDT	2793	Pavir.J11842.1	30263747	Pavir.J11842.1.p|PACid:30263747	-0.002683	0.998142014310943	0.9852	4	AT3G62030.2	rotamase CYP 4	Cell division & Cell cycle
RT1-SDT	4682	Pavir.Aa00269.1	30253121	Pavir.Aa00269.1.p|PACid:30253121	0.45221	1.36813443629989	<.0001	5	AT3G66654.1	Cyclophilin-like peptidyl-prolyl cis-trans isomerase family protein	Cell division & Cell cycle
RT1-SDT	6906	Pavir.Cb00792.1	30268741	Pavir.Cb00792.1.p|PACid:30268741	0.3117	1.24116937077471	0.058	2	AT4G19600.1	Cyclin family protein	Cell division & Cell cycle
RT1-SDT	3961	Pavir.J00322.1	30257141	Pavir.J00322.1.p|PACid:30257141	-0.17296	0.887020898252604	0.0509	4	AT4G30820.1	cyclin-dependent kinase-activating kinase assembly factor-related / CDK-activating kinase assembly factor-related	Cell division & Cell cycle
RT1-SDT	3861	Pavir.Ea02070.1	30229349	Pavir.Ea02070.1.p|PACid:30229349	-0.4921	0.710989421554317	0.0309	5	AT4G33060.1	Cyclophilin-like peptidyl-prolyl cis-trans isomerase family protein	Cell division & Cell cycle
RT1-SDT	3642	Pavir.Eb02395.1	30313017	Pavir.Eb02395.1.p|PACid:30313017	-0.5979	0.660714998515794	0.0054	6	AT4G33060.1	Cyclophilin-like peptidyl-prolyl cis-trans isomerase family protein	Cell division & Cell cycle
RT1-SDT	133	Pavir.Ia04204.1	30212873	Pavir.Ia04204.1.p|PACid:30212873	-0.4548	0.729611310714118	<.0001	20	AT5G03340.1	ATPase, AAA-type, CDC48 protein	Cell division & Cell cycle
RT1-SDT	92	Pavir.Ib03330.1	30240420	Pavir.Ib03330.1.p|PACid:30240420	-0.64843	0.63797420576474	<.0001	19	AT5G03340.1	ATPase, AAA-type, CDC48 protein	Cell division & Cell cycle
RT1-SDT	181	Pavir.J08673.1	30190581	Pavir.J08673.1.p|PACid:30190581	-0.5146	0.699986983496832	0.0803	4	AT5G03340.1	ATPase, AAA-type, CDC48 protein	Cell division & Cell cycle
RT1-SDT	462	Pavir.J03499.1	30220672	Pavir.J03499.1.p|PACid:30220672	0.12581	1.09112016928702	0.0033	42	AT5G13120.1	cyclophilin 20-2	Cell division & Cell cycle		Carbohydrates metabolism	518		Carbohydrates metabolism
RT1-SDT	2006	Pavir.Ca00837.1	30203971	Pavir.Ca00837.1.p|PACid:30203971	0.1207	1.08726227751157	0.3578	3	AT5G13120.1	cyclophilin 20-2	Cell division & Cell cycle		Cell division & Cell cycle	519		Cell division & Cell cycle
RT1-SDT	7902	Pavir.Db00336.1	30262716	Pavir.Db00336.1.p|PACid:30262716	0.1884	1.13949926971051	0.3868	2	AT5G15920.1	structural maintenance of chromosomes 5	Cell division & Cell cycle
RT1-SDT	4069	Pavir.Fa00860.1	30188287	Pavir.Fa00860.1.p|PACid:30188287	0.4356	1.35247319386904	0.0034	3	AT5G16040.1	Regulator of chromosome condensation (RCC1) family protein	Cell division & Cell cycle
RT1-SDT	4061	Pavir.Fb01579.1	30280456	Pavir.Fb01579.1.p|PACid:30280456	0.3277	1.25501099194775	0.0229	3	AT5G16040.1	Regulator of chromosome condensation (RCC1) family protein	Cell division & Cell cycle
RT1-SDT	4734	Pavir.Ca00603.1	30204217	Pavir.Ca00603.1.p|PACid:30204217	0.22501	1.16878534993587	0.0165	7	AT5G24020.1	septum site-determining protein (MIND)	Cell division & Cell cycle
RT1-SDT	836	Pavir.Ga01443.1	30302646	Pavir.Ga01443.1.p|PACid:30302646	0.2092	1.15604695758464	0.1253	4	AT5G40770.1	prohibitin 3	Cell division & Cell cycle
RT1-SDT	816	Pavir.J33724.1	30284534	Pavir.J33724.1.p|PACid:30284534	0.4157	1.3339457546137	0.0003	5	AT5G40770.1	prohibitin 3	Cell division & Cell cycle
RT1-SDT	4882	Pavir.J04487.1	30296157	Pavir.J04487.1.p|PACid:30296157	-0.06263	0.957516995784327	0.7068	3	AT5G48600.1	structural maintenance of chromosome 3	Cell division & Cell cycle
RT1-SDT	5982	Pavir.Ea03660.1	30227015	Pavir.Ea03660.1.p|PACid:30227015	0.21864	1.16363613257361	0.0103	4	AT5G49880.1	mitotic checkpoint family protein	Cell division & Cell cycle
RT1-SDT	2091	Pavir.Gb00112.1	30224422	Pavir.Gb00112.1.p|PACid:30224422	-0.18152	0.881773484534273	0.0249	14	AT5G55280.1	homolog of bacterial cytokinesis Z-ring protein FTSZ 1-1	Cell division & Cell cycle
RT1-SDT	2983	Pavir.J27483.1	30248577	Pavir.J27483.1.p|PACid:30248577	-0.17225	0.887457539271498	0.0358	7	AT5G55280.1	homolog of bacterial cytokinesis Z-ring protein FTSZ 1-1	Cell division & Cell cycle
RT1-SDT	4825	Pavir.Ab01294.1	30232424	Pavir.Ab01294.1.p|PACid:30232424	-0.6116	0.654470468318395	0.0001	5	AT5G61960.1	MEI2-like protein 1	Cell division & Cell cycle
RT1-SDT	5713	Pavir.J06049.1	30259428	Pavir.J06049.1.p|PACid:30259428	0.3644	1.28734612596014	0.0279	2	AT2G38670.1	phosphorylethanolamine cytidylyltransferase 1	Cell division & Cell cycle
RT1-SDT	1958	Pavir.Ba02071.1	30288986	Pavir.Ba02071.1.p|PACid:30288986	-0.3909	0.762653687921441	<.0001	11	AT5G43070.1	WPP domain protein 1	Cell division & Cell cycle
RT1-SDT	4370	Pavir.Bb02298.1	30296584	Pavir.Bb02298.1.p|PACid:30296584	-0.4826	0.715686662982738	<.0001	10	AT5G43070.1	WPP domain protein 1	Cell division & Cell cycle
RT1-SDT	766	Pavir.J00892.1	30275043	Pavir.J00892.1.p|PACid:30275043	2.5075	5.68633856603495	<.0001	25	AT1G01750.1	actin depolymerizing factor 11	Cell organization
RT1-SDT	1249	Pavir.J16347.1	30307684	Pavir.J16347.1.p|PACid:30307684	2.5751	5.95912289309894	<.0001	18	AT1G01750.1	actin depolymerizing factor 11	Cell organization
RT1-SDT	6183	Pavir.Da02351.1	30193329	Pavir.Da02351.1.p|PACid:30193329	0.15242	1.11143224373463	0.0593	2	AT1G01820.1	peroxin 11c	Cell organization
RT1-SDT	3395	Pavir.Da02271.1	30193909	Pavir.Da02271.1.p|PACid:30193909	-0.4205	0.747165631564572	0.0001	8	AT1G01950.1	armadillo repeat kinesin 2	Cell organization
RT1-SDT	5655	Pavir.Ia00849.1	30213251	Pavir.Ia00849.1.p|PACid:30213251	-0.377	0.770037174236072	0.0057	4	AT1G13330.1	Arabidopsis Hop2 homolog	Cell organization
RT1-SDT	2844	Pavir.Ib00095.1	30242296	Pavir.Ib00095.1.p|PACid:30242296	0.61302	1.52945748051861	<.0001	16	AT1G18450.1	actin-related protein 4	Cell organization
RT1-SDT	1075	Pavir.Ab02954.1	30234394	Pavir.Ab02954.1.p|PACid:30234394	-1.2226	0.428509769050806	<.0001	6	AT1G24764.1	microtubule-associated proteins 70-2	Cell organization
RT1-SDT	1768	Pavir.Da01222.1	30191619	Pavir.Da01222.1.p|PACid:30191619	-0.4367	0.738822649669723	0.0811	2	AT1G24764.1	microtubule-associated proteins 70-2	Cell organization
RT1-SDT	1366	Pavir.Db01711.1	30262686	Pavir.Db01711.1.p|PACid:30262686	-0.82601	0.564087158760468	<.0001	9	AT1G24764.1	microtubule-associated proteins 70-2	Cell organization
RT1-SDT	921	Pavir.Aa00752.1	30252862	Pavir.Aa00752.1.p|PACid:30252862	-1.2644	0.416272454207656	<.0001	2	AT1G24764.1	microtubule-associated proteins 70-2	Cell organization
RT1-SDT	754	Pavir.Ab02956.1	30233010	Pavir.Ab02956.1.p|PACid:30233010	-0.6051	0.657425809238578	0.0066	3	AT1G24764.1	microtubule-associated proteins 70-2	Cell organization
RT1-SDT	904	Pavir.J33307.1	30219290	Pavir.J33307.1.p|PACid:30219290	-1.0945	0.468298395452307	0.0002	3	AT1G24764.1	microtubule-associated proteins 70-2	Cell organization
RT1-SDT	1546	Pavir.Ca00211.1	30205500	Pavir.Ca00211.1.p|PACid:30205500	0.04367	1.03073252354502	0.3873	38	AT1G43700.1	VIRE2-interacting protein 1	Cell organization
RT1-SDT	1406	Pavir.Ha01827.1	30318630	Pavir.Ha01827.1.p|PACid:30318630	0.10904	1.0785103339358	0.0239	41	AT1G43700.1	VIRE2-interacting protein 1	Cell organization
RT1-SDT	1553	Pavir.Cb01934.1	30267598	Pavir.Cb01934.1.p|PACid:30267598	0.03491	1.02449290984579	0.5101	36	AT1G43700.1	VIRE2-interacting protein 1	Cell organization
RT1-SDT	5903	Pavir.Ib01414.1	30239528	Pavir.Ib01414.1.p|PACid:30239528	0.9428	1.92225535712938	<.0001	2	AT1G47750.1	peroxin 11A	Cell organization
RT1-SDT	78	Pavir.J00824.1	30273961	Pavir.J00824.1.p|PACid:30273961	-0.7704	0.586254907705875	0.0124	2	AT1G50010.1	tubulin alpha-2 chain	Cell organization
RT1-SDT	4068	Pavir.Bb01893.1	30297522	Pavir.Bb01893.1.p|PACid:30297522	1.64084	3.11847350148817	<.0001	9	AT1G68090.1	annexin 5	Cell organization
RT1-SDT	6874	Pavir.J35022.1	30277399	Pavir.J35022.1.p|PACid:30277399	-0.1888	0.87733516478202	0.3326	3	AT1G70140.1	formin 8	Cell organization
RT1-SDT	6767	Pavir.Ia04080.1	30209886	Pavir.Ia04080.1.p|PACid:30209886	0.298	1.22943886725458	0.0408	3	AT1G71440.1	tubulin folding cofactor E / Pfifferling (PFI)	Cell organization
RT1-SDT	4307	Pavir.Ca02911.1	30205637	Pavir.Ca02911.1.p|PACid:30205637	-0.05047	0.965621698237484	0.6918	6	AT1G74790.1	catalytics	Cell organization
RT1-SDT	5007	Pavir.Bb00639.1	30297064	Pavir.Bb00639.1.p|PACid:30297064	-0.02374	0.983679335037923	0.8805	6	AT1G74790.1	catalytics	Cell organization
RT1-SDT	5466	Pavir.Ia04970.1	30210508	Pavir.Ia04970.1.p|PACid:30210508	-0.8547	0.552980303726846	0.0032	2	AT2G01910.1	Microtubule associated protein (MAP65/ASE1) family protein	Cell organization
RT1-SDT	4903	Pavir.Ba02054.1	30291442	Pavir.Ba02054.1.p|PACid:30291442	-0.09214	0.938130155365292	0.5797	2	AT2G01910.1	Microtubule associated protein (MAP65/ASE1) family protein	Cell organization
RT1-SDT	6934	Pavir.Ia00391.1	30214981	Pavir.Ia00391.1.p|PACid:30214981	-0.7733	0.585077644610883	0.0008	3	AT2G03430.1	Ankyrin repeat family protein	Cell organization
RT1-SDT	4013	Pavir.Ea02930.1	30228432	Pavir.Ea02930.1.p|PACid:30228432	-0.4115	0.751841262210512	0.1464	3	AT2G19770.1	profilin 5	Cell organization
RT1-SDT	2581	Pavir.J07876.1	30202310	Pavir.J07876.1.p|PACid:30202310	-0.31034	0.806451680324174	<.0001	16	AT2G19770.1	profilin 5	Cell organization
RT1-SDT	3353	Pavir.Ba00403.1	30291066	Pavir.Ba00403.1.p|PACid:30291066	-0.08289	0.944164405344389	0.2821	10	AT2G26210.1	Ankyrin repeat family protein	Cell organization
RT1-SDT	6105	Pavir.Aa00114.1	30249418	Pavir.Aa00114.1.p|PACid:30249418	0.3922	1.31239317830794	0.115	2	AT2G31300.1	actin-related protein C1B	Cell organization
RT1-SDT	5106	Pavir.Ea02360.1	30230762	Pavir.Ea02360.1.p|PACid:30230762	0.3977	1.31740597637789	0.0237	2	AT2G34560.2	P-loop containing nucleoside triphosphate hydrolases superfamily protein	Cell organization
RT1-SDT	2762	Pavir.Eb03211.1	30309075	Pavir.Eb03211.1.p|PACid:30309075	-0.1039	0.930514153793943	0.3095	13	AT2G34560.2	P-loop containing nucleoside triphosphate hydrolases superfamily protein	Cell organization
RT1-SDT	6533	Pavir.J23402.1	30254978	Pavir.J23402.1.p|PACid:30254978	0.2455	1.18550356397892	0.2623	2	AT2G35490.1	Plastid-lipid associated protein PAP / fibrillin family protein	Cell organization
RT1-SDT	2350	Pavir.Ea03234.1	30231191	Pavir.Ea03234.1.p|PACid:30231191	0.22946	1.17239603987008	0.0006	18	AT2G35630.1	ARM repeat superfamily protein	Cell organization
RT1-SDT	3771	Pavir.J05148.1	30200199	Pavir.J05148.1.p|PACid:30200199	-0.4635	0.725224716623707	<.0001	6	AT2G36200.1	P-loop containing nucleoside triphosphate hydrolases superfamily protein	Cell organization
RT1-SDT	6192	Pavir.Ca01075.1	30204788	Pavir.Ca01075.1.p|PACid:30204788	0.01105	1.00768868363382	0.9451	2	AT2G37080.1	ROP interactive partner 3	Cell organization
RT1-SDT	4188	Pavir.J03151.1	30281901	Pavir.J03151.1.p|PACid:30281901	-0.43686	0.738740716159317	<.0001	5	AT2G37080.1	ROP interactive partner 3	Cell organization
RT1-SDT	1371	Pavir.Cb01427.1	30267841	Pavir.Cb01427.1.p|PACid:30267841	0.83571	1.78473515248614	<.0001	19	AT2G38750.1	annexin 4	Cell organization
RT1-SDT	1521	Pavir.J20383.1	30302010	Pavir.J20383.1.p|PACid:30302010	0.84094	1.79121684401829	<.0001	14	AT2G38750.1	annexin 4	Cell organization
RT1-SDT	2903	Pavir.Cb01428.2	30268228	Pavir.Cb01428.2.p|PACid:30268228	0.71625	1.64290607076643	<.0001	13	AT2G38760.1	annexin 3	Cell organization
RT1-SDT	359	Pavir.Ea02901.1	30230286	Pavir.Ea02901.1.p|PACid:30230286	0.40968	1.32839113483441	<.0001	13	AT2G41740.1	villin 2	Cell organization
RT1-SDT	369	Pavir.Eb03096.1	30308970	Pavir.Eb03096.1.p|PACid:30308970	0.46272	1.37813765639377	<.0001	8	AT2G41740.1	villin 2	Cell organization
RT1-SDT	4529	Pavir.J11076.1	30314415	Pavir.J11076.1.p|PACid:30314415	-0.2623	0.833757650768083	0.2443	4	AT3G03490.1	peroxin 19-1	Cell organization
RT1-SDT	4444	Pavir.J15036.1	30197828	Pavir.J15036.1.p|PACid:30197828	-0.5387	0.688390932783357	0.0009	5	AT3G03490.1	peroxin 19-1	Cell organization
RT1-SDT	1472	Pavir.Ca00831.1	30206617	Pavir.Ca00831.1.p|PACid:30206617	-0.4081	0.753615216342522	0.0007	5	AT3G04710.3	ankyrin repeat family protein	Cell organization
RT1-SDT	1978	Pavir.J01661.1	30306688	Pavir.J01661.1.p|PACid:30306688	-0.3964	0.759751751082382	0.0374	2	AT3G04710.3	ankyrin repeat family protein	Cell organization
RT1-SDT	4300	Pavir.Ba00207.1	30293750	Pavir.Ba00207.1.p|PACid:30293750	-0.2464	0.842997349351099	0.132	4	AT3G05520.1	Subunits of heterodimeric actin filament capping protein Capz superfamily	Cell organization
RT1-SDT	6786	Pavir.Ib00269.1	30242746	Pavir.Ib00269.1.p|PACid:30242746	-0.5321	0.691547378432605	0.0147	2	AT3G09890.1	Ankyrin repeat family protein	Cell organization
RT1-SDT	7086	Pavir.J23721.1	30314664	Pavir.J23721.1.p|PACid:30314664	-0.1361	0.909975747182492	0.3809	2	AT3G12020.2	P-loop containing nucleoside triphosphate hydrolases superfamily protein	Cell organization
RT1-SDT	134	Pavir.J18635.1	30199985	Pavir.J18635.1.p|PACid:30199985	-0.4431	0.735552386554547	0.0232	3	AT3G12110.1	actin-11	Cell organization
RT1-SDT	4626	Pavir.Ea00565.1	30225986	Pavir.Ea00565.1.p|PACid:30225986	-0.119	0.92082569720504	0.3595	5	AT3G12380.2	actin-related protein 5	Cell organization
RT1-SDT	4000	Pavir.Eb02180.1	30309827	Pavir.Eb02180.1.p|PACid:30309827	-0.8751	0.545216073524429	0.0093	2	AT3G16060.1	ATP binding microtubule motor family protein	Cell organization
RT1-SDT	4025	Pavir.Ea01354.1	30226364	Pavir.Ea01354.1.p|PACid:30226364	-0.3696	0.773997064577636	0.0226	3	AT3G16630.1	P-loop containing nucleoside triphosphate hydrolases superfamily protein	Cell organization
RT1-SDT	3457	Pavir.J05287.1	30282215	Pavir.J05287.1.p|PACid:30282215	-0.5929	0.663008834827097	0.0269	2	AT3G16630.1	P-loop containing nucleoside triphosphate hydrolases superfamily protein	Cell organization
RT1-SDT	6160	Pavir.Ib03545.1	30242908	Pavir.Ib03545.1.p|PACid:30242908	-0.2899	0.81795875317323	0.3876	2	AT3G19960.1	myosin 1	Cell organization
RT1-SDT	3767	Pavir.Aa00796.1	30249014	Pavir.Aa00796.1.p|PACid:30249014	-0.3186	0.801847617948481	0.0529	6	AT3G27960.1	Tetratricopeptide repeat (TPR)-like superfamily protein	Cell organization
RT1-SDT	5426	Pavir.Eb01116.1	30310142	Pavir.Eb01116.1.p|PACid:30310142	0.4428	1.35923979819835	0.0188	2	AT3G33520.1	actin-related protein 6	Cell organization
RT1-SDT	4195	Pavir.Ca00705.1	30203264	Pavir.Ca00705.1.p|PACid:30203264	-0.6996	0.615742903190721	<.0001	7	AT3G45850.1	P-loop containing nucleoside triphosphate hydrolases superfamily protein	Cell organization
RT1-SDT	1563	Pavir.J01737.1	30294680	Pavir.J01737.1.p|PACid:30294680	-0.11125	0.925785582210103	0.2509	7	AT3G55005.1	tonneau 1b (TON1b)	Cell organization
RT1-SDT	1964	Pavir.J06855.1	30275895	Pavir.J06855.1.p|PACid:30275895	-0.1288	0.914591870067159	0.2578	4	AT3G55005.1	tonneau 1b (TON1b)	Cell organization
RT1-SDT	4281	Pavir.Da00511.1	30194106	Pavir.Da00511.1.p|PACid:30194106	0.1155	1.08335044112298	0.3717	4	AT3G57890.1	Tubulin binding cofactor C domain-containing protein	Cell organization
RT1-SDT	4027	Pavir.Ib03320.1	30238016	Pavir.Ib03320.1.p|PACid:30238016	0.1047	1.07527077093703	0.4346	3	AT3G60830.1	actin-related protein 7	Cell organization
RT1-SDT	4469	Pavir.Ca01138.1	30206465	Pavir.Ca01138.1.p|PACid:30206465	-0.1862	0.878917708599492	0.1456	6	AT3G61650.1	gamma-tubulin	Cell organization
RT1-SDT	6570	Pavir.Ba03995.1	30289500	Pavir.Ba03995.1.p|PACid:30289500	0.02054	1.0143390753303	0.8869	3	AT4G05190.1	kinesin 5	Cell organization
RT1-SDT	5569	Pavir.Ab00043.1	30235020	Pavir.Ab00043.1.p|PACid:30235020	0.109	1.07848043169445	0.3979	3	AT4G10840.1	Tetratricopeptide repeat (TPR)-like superfamily protein	Cell organization
RT1-SDT	77	Pavir.Ia00744.1	30214876	Pavir.Ia00744.1.p|PACid:30214876	-0.4827	0.715637057082706	0.0429	2	AT4G14960.2	Tubulin/FtsZ family protein	Cell organization
RT1-SDT	494	Pavir.Ia00442.1	30214623	Pavir.Ia00442.1.p|PACid:30214623	-0.6997	0.615700224624135	0.0016	3	AT4G14960.2	Tubulin/FtsZ family protein	Cell organization
RT1-SDT	3894	Pavir.Ib01529.1	30242174	Pavir.Ib01529.1.p|PACid:30242174	0.1494	1.1091081110411	0.1871	9	AT4G16340.1	guanyl-nucleotide exchange factors;GTPase binding;GTP binding	Cell organization
RT1-SDT	3975	Pavir.Ia02671.1	30213222	Pavir.Ia02671.1.p|PACid:30213222	0.1263	1.091490822594	0.3166	5	AT4G19150.1	Ankyrin repeat family protein	Cell organization
RT1-SDT	6539	Pavir.J10112.1	30195928	Pavir.J10112.1.p|PACid:30195928	-0.2156	0.861187927234614	0.265	2	AT4G19150.1	Ankyrin repeat family protein	Cell organization
RT1-SDT	2519	Pavir.Hb01246.1	30265856	Pavir.Hb01246.1.p|PACid:30265856	1.0908	2.129921116556	<.0001	9	AT4G22240.1	Plastid-lipid associated protein PAP / fibrillin family protein	Cell organization
RT1-SDT	913	Pavir.Db02134.1	30260775	Pavir.Db02134.1.p|PACid:30260775	0.35253	1.27679773732011	<.0001	10	AT4G30160.1	villin 4	Cell organization
RT1-SDT	998	Pavir.J05226.1	30277663	Pavir.J05226.1.p|PACid:30277663	0.1046	1.07519624142974	0.5748	3	AT4G30160.1	villin 4	Cell organization
RT1-SDT	2925	Pavir.J10280.1	30225877	Pavir.J10280.1.p|PACid:30225877	0.3517	1.27606339131549	0.0077	3	AT4G30160.1	villin 4	Cell organization
RT1-SDT	2452	Pavir.J33845.1	30271603	Pavir.J33845.1.p|PACid:30271603	0.08313	1.05931378423055	0.4435	4	AT4G30160.1	villin 4	Cell organization
RT1-SDT	1688	Pavir.Da00290.1	30193086	Pavir.Da00290.1.p|PACid:30193086	0.1745	1.12857320335302	0.1294	5	AT4G30160.2	villin 4	Cell organization
RT1-SDT	1307	Pavir.Db00524.1	30262241	Pavir.Db00524.1.p|PACid:30262241	0.29555	1.22735279294562	0.0002	14	AT4G30160.2	villin 4	Cell organization
RT1-SDT	4264	Pavir.J32772.1	30219792	Pavir.J32772.1.p|PACid:30219792	0.2679	1.20405391968093	0.0024	6	AT4G30160.2	villin 4	Cell organization
RT1-SDT	908	Pavir.Ba01666.1	30290603	Pavir.Ba01666.1.p|PACid:30290603	0.42178	1.33957931121482	<.0001	7	AT4G31340.1	myosin heavy chain-related	Cell organization
RT1-SDT	2338	Pavir.Fb01890.1	30281294	Pavir.Fb01890.1.p|PACid:30281294	0.74919	1.680848854263	<.0001	8	AT4G31340.1	myosin heavy chain-related	Cell organization
RT1-SDT	955	Pavir.J02771.1	30190170	Pavir.J02771.1.p|PACid:30190170	0.17828	1.13153405103465	0.0419	5	AT4G31340.1	myosin heavy chain-related	Cell organization
RT1-SDT	771	Pavir.Fb02364.1	30279702	Pavir.Fb02364.1.p|PACid:30279702	-0.28396	0.821333472635613	0.0024	9	AT4G35450.1	ankyrin repeat-containing protein 2	Cell organization
RT1-SDT	950	Pavir.J01073.1	30257296	Pavir.J01073.1.p|PACid:30257296	-0.95778	0.514848546211187	<.0001	13	AT4G35450.1	ankyrin repeat-containing protein 2	Cell organization
RT1-SDT	1067	Pavir.J19257.1	30258021	Pavir.J19257.1.p|PACid:30258021	-0.16203	0.893766576810066	0.0077	15	AT4G35450.1	ankyrin repeat-containing protein 2	Cell organization
RT1-SDT	4613	Pavir.Ib03746.1	30242282	Pavir.Ib03746.1.p|PACid:30242282	-0.2275	0.854113676345302	0.0849	6	AT4G39050.1	Kinesin motor family protein	Cell organization
RT1-SDT	5820	Pavir.J01039.1	30272594	Pavir.J01039.1.p|PACid:30272594	1.39906	2.63729690879899	<.0001	3	AT5G02130.1	Tetratricopeptide repeat (TPR)-like superfamily protein	Cell organization
RT1-SDT	7139	Pavir.Fa01047.1	30186331	Pavir.Fa01047.1.p|PACid:30186331	-0.6251	0.648374833849098	0.0011	2	AT5G08120.1	movement protein binding protein 2C	Cell organization
RT1-SDT	32	Pavir.Eb04008.1	30314287	Pavir.Eb04008.1.p|PACid:30314287	0.37	1.29235283063749	0.0156	5	AT5G09810.1	actin 7	Cell organization
RT1-SDT	283	Pavir.J00639.1	30255563	Pavir.J00639.1.p|PACid:30255563	1.7793	3.43259583574353	<.0001	16	AT5G09810.1	actin 7	Cell organization
RT1-SDT	71	Pavir.J01004.1	30220128	Pavir.J01004.1.p|PACid:30220128	0.825	1.77153503820472	<.0001	4	AT5G09810.1	actin 7	Cell organization
RT1-SDT	54	Pavir.J40820.1	30196071	Pavir.J40820.1.p|PACid:30196071	0.61006	1.52632268561656	<.0001	5	AT5G09810.1	actin 7	Cell organization
RT1-SDT	1420	Pavir.Aa00504.1	30253559	Pavir.Aa00504.1.p|PACid:30253559	1.27495	2.41990430949279	<.0001	34	AT5G10230.1	annexin 7	Cell organization
RT1-SDT	215	Pavir.Ea03187.1	30229698	Pavir.Ea03187.1.p|PACid:30229698	-0.66309	0.631524233162282	<.0001	11	AT5G12250.1	beta-6 tubulin	Cell organization
RT1-SDT	4185	Pavir.Ba00107.1	30290114	Pavir.Ba00107.1.p|PACid:30290114	-1.0174	0.494005839259019	0.0001	3	AT5G12320.1	ankyrin repeat family protein	Cell organization
RT1-SDT	5129	Pavir.J34802.1	30244370	Pavir.J34802.1.p|PACid:30244370	-0.07002	0.952624791768628	0.7613	4	AT5G19780.1	tubulin alpha-5	Cell organization
RT1-SDT	378	Pavir.Ba00532.1	30289237	Pavir.Ba00532.1.p|PACid:30289237	-0.71598	0.608791448914522	<.0001	21	AT5G19780.1	tubulin alpha-5	Cell organization
RT1-SDT	293	Pavir.Ia01092.1	30215299	Pavir.Ia01092.1.p|PACid:30215299	-0.31859	0.8018531759519	<.0001	34	AT5G23860.1	tubulin beta 8	Cell organization
RT1-SDT	959	Pavir.Db01650.1	30262868	Pavir.Db01650.1.p|PACid:30262868	-0.31926	0.801480874888851	<.0001	51	AT5G53400.1	HSP20-like chaperones superfamily protein	Cell organization
RT1-SDT	5260	Pavir.Da00561.1	30191822	Pavir.Da00561.1.p|PACid:30191822	-1.096	0.4678117489157	<.0001	4	AT5G55230.1	microtubule-associated proteins 65-1	Cell organization
RT1-SDT	3427	Pavir.Db00940.1	30261690	Pavir.Db00940.1.p|PACid:30261690	-1.3393	0.395212367655227	<.0001	2	AT5G55230.1	microtubule-associated proteins 65-1	Cell organization
RT1-SDT	4702	Pavir.Da02207.1	30192467	Pavir.Da02207.1.p|PACid:30192467	-0.1692	0.889335696885649	0.1774	4	AT5G56600.1	profilin 3	Cell organization
RT1-SDT	4819	Pavir.Ib01148.1	30238583	Pavir.Ib01148.1.p|PACid:30238583	0.1675	1.12311059510239	0.2238	5	AT5G59210.1	myosin heavy chain-related	Cell organization
RT1-SDT	5763	Pavir.Ca00642.1	30204600	Pavir.Ca00642.1.p|PACid:30204600	-1.0399	0.48636118452618	0.0036	2	AT5G59890.1	actin depolymerizing factor 4	Cell organization
RT1-SDT	702	Pavir.J16348.1	30307685	Pavir.J16348.1.p|PACid:30307685	-0.05199	0.964604870692431	0.4986	9	AT5G59890.1	actin depolymerizing factor 4	Cell organization
RT1-SDT	338	Pavir.Ia00478.1	30211353	Pavir.Ia00478.1.p|PACid:30211353	-0.1053	0.929611615212177	0.6649	3	AT5G62690.1	tubulin beta chain 2	Cell organization
RT1-SDT	1271	Pavir.Da01308.1	30191491	Pavir.Da01308.1.p|PACid:30191491	1.26705	2.40668946005433	<.0001	26	AT5G65020.1	annexin 2	Cell organization
RT1-SDT	4921	Pavir.Ia01574.1	30211547	Pavir.Ia01574.1.p|PACid:30211547	-0.9883	0.504071397847858	<.0001	3	AT5G67270.1	end binding protein 1C	Cell organization
RT1-SDT	5570	Pavir.Ea02466.1	30230375	Pavir.Ea02466.1.p|PACid:30230375	-0.2073	0.866156725444497	0.1917	3	AT1G80350.1	P-loop containing nucleoside triphosphate hydrolases superfamily protein	Cell organization
RT1-SDT	2037	Pavir.Eb04034.1	30309185	Pavir.Eb04034.1.p|PACid:30309185	0.34911	1.27377459208345	<.0001	31	AT1G08200.1	UDP-D-apiose/UDP-D-xylose synthase 2	Cell wall synthesis / modification
RT1-SDT	5291	Pavir.Ba00757.1	30293217	Pavir.Ba00757.1.p|PACid:30293217	-0.08581	0.942255358846379	0.4994	4	AT1G11545.1	xyloglucan endotransglucosylase/hydrolase 8	Cell wall synthesis / modification
RT1-SDT	5534	Pavir.J04630.1	30295020	Pavir.J04630.1.p|PACid:30295020	0.3141	1.24323584045919	0.0684	2	AT1G12040.1	leucine-rich repeat/extensin 1	Cell wall synthesis / modification
RT1-SDT	6592	Pavir.Ab02949.1	30236440	Pavir.Ab02949.1.p|PACid:30236440	0.1593	1.11674515846718	0.3091	3	AT1G12040.1	leucine-rich repeat/extensin 1	Cell wall synthesis / modification
RT1-SDT	5882	Pavir.Da00367.1	30193939	Pavir.Da00367.1.p|PACid:30193939	0.6747	1.5962648042645	<.0001	3	AT1G17890.1	NAD(P)-binding Rossmann-fold superfamily protein	Cell wall synthesis / modification
RT1-SDT	4822	Pavir.Ga00440.1	30305571	Pavir.Ga00440.1.p|PACid:30305571	-0.06583	0.955395508799372	0.7065	2	AT1G30620.1	NAD(P)-binding Rossmann-fold superfamily protein	Cell wall synthesis / modification
RT1-SDT	6098	Pavir.Ib01408.1	30240317	Pavir.Ib01408.1.p|PACid:30240317	-0.03032	0.979203079304382	0.8843	2	AT1G30620.1	NAD(P)-binding Rossmann-fold superfamily protein	Cell wall synthesis / modification
RT1-SDT	2878	Pavir.Fa01746.1	30186509	Pavir.Fa01746.1.p|PACid:30186509	0.517	1.43097652002291	0.0007	3	AT1G31070.2	N-acetylglucosamine-1-phosphate uridylyltransferase 1	Cell wall synthesis / modification
RT1-SDT	1641	Pavir.Ga00467.1	30303092	Pavir.Ga00467.1.p|PACid:30303092	0.9473	1.92826054430234	<.0001	5	AT1G31070.2	N-acetylglucosamine-1-phosphate uridylyltransferase 1	Cell wall synthesis / modification
RT1-SDT	1769	Pavir.J12326.1	30257213	Pavir.J12326.1.p|PACid:30257213	0.5922	1.50754388503167	0.0002	3	AT1G31070.2	N-acetylglucosamine-1-phosphate uridylyltransferase 1	Cell wall synthesis / modification
RT1-SDT	4428	Pavir.J10951.1	30207724	Pavir.J10951.1.p|PACid:30207724	0.21601	1.16151678291865	0.017	7	AT1G53000.1	Nucleotide-diphospho-sugar transferases superfamily protein	Cell wall synthesis / modification
RT1-SDT	3536	Pavir.J20567.1	30272930	Pavir.J20567.1.p|PACid:30272930	0.18749	1.13878074130273	0.021	9	AT1G53000.1	Nucleotide-diphospho-sugar transferases superfamily protein	Cell wall synthesis / modification
RT1-SDT	3811	Pavir.Ea01016.1	30228601	Pavir.Ea01016.1.p|PACid:30228601	-0.91397	0.53072264042721	<.0001	8	AT1G53830.1	pectin methylesterase 2	Cell wall synthesis / modification
RT1-SDT	7285	Pavir.Ba00133.1	30289981	Pavir.Ba00133.1.p|PACid:30289981	-0.1328	0.912059595063503	0.6778	2	AT1G53830.1	pectin methylesterase 2	Cell wall synthesis / modification
RT1-SDT	1385	Pavir.Ab02692.1	30233425	Pavir.Ab02692.1.p|PACid:30233425	0.18452	1.13643880503949	0.0043	17	AT1G63000.1	nucleotide-rhamnose synthase/epimerase-reductase	Cell wall synthesis / modification
RT1-SDT	2461	Pavir.Ia02186.1	30213210	Pavir.Ia02186.1.p|PACid:30213210	0.4384	1.35510063908015	0.003	14	AT1G65680.1	expansin B2	Cell wall synthesis / modification
RT1-SDT	2986	Pavir.Ia02187.1	30211637	Pavir.Ia02187.1.p|PACid:30211637	-0.43421	0.74009891168951	<.0001	18	AT1G65680.1	expansin B2	Cell wall synthesis / modification
RT1-SDT	3801	Pavir.Ia02300.1	30210423	Pavir.Ia02300.1.p|PACid:30210423	0.07152	1.05082323084343	0.6941	2	AT1G65680.1	expansin B2	Cell wall synthesis / modification
RT1-SDT	3220	Pavir.Ib00833.1	30242801	Pavir.Ib00833.1.p|PACid:30242801	0.18949	1.14036052139006	0.0291	10	AT1G65680.1	expansin B2	Cell wall synthesis / modification
RT1-SDT	3969	Pavir.Ib02221.1	30242977	Pavir.Ib02221.1.p|PACid:30242977	-0.3004	0.812027223389904	0.185	2	AT1G65680.1	expansin B2	Cell wall synthesis / modification
RT1-SDT	5459	Pavir.J01056.1	30208403	Pavir.J01056.1.p|PACid:30208403	1.2365	2.35626205589751	<.0001	4	AT1G65680.1	expansin B2	Cell wall synthesis / modification
RT1-SDT	3160	Pavir.J40764.1	30263359	Pavir.J40764.1.p|PACid:30263359	0.1331	1.0966475997727	0.4136	3	AT1G65680.1	expansin B2	Cell wall synthesis / modification
RT1-SDT	3761	Pavir.J01055.1	30208401	Pavir.J01055.1.p|PACid:30208401	0.8136	1.75759174635669	<.0001	4	AT1G65680.1	expansin B2	Cell wall synthesis / modification
RT1-SDT	2114	Pavir.J14255.1	30217612	Pavir.J14255.1.p|PACid:30217612	0.40001	1.31951705693647	<.0001	17	AT1G78060.1	Glycosyl hydrolase family protein	Cell wall synthesis / modification
RT1-SDT	696	Pavir.Aa02864.1	30251979	Pavir.Aa02864.1.p|PACid:30251979	0.12346	1.08934429489479	0.1987	10	AT1G78570.1	rhamnose biosynthesis 1	Cell wall synthesis / modification
RT1-SDT	721	Pavir.Ab01243.1	30234054	Pavir.Ab01243.1.p|PACid:30234054	0.33838	1.26433607557318	<.0001	13	AT1G78570.1	rhamnose biosynthesis 1	Cell wall synthesis / modification
RT1-SDT	1149	Pavir.Ib01282.1	30239733	Pavir.Ib01282.1.p|PACid:30239733	0.08119	1.05789027644048	0.1822	14	AT1G78570.1	rhamnose biosynthesis 1	Cell wall synthesis / modification
RT1-SDT	1167	Pavir.Ca00442.1	30205560	Pavir.Ca00442.1.p|PACid:30205560	0.1399	1.10182874028119	0.255	3	AT1G78570.1	rhamnose biosynthesis 1	Cell wall synthesis / modification
RT1-SDT	367	Pavir.Ca00351.1	30203757	Pavir.Ca00351.1.p|PACid:30203757	0.172	1.12661922849728	0.0279	15	AT1G79500.1	Aldolase-type TIM barrel family protein	Cell wall synthesis / modification
RT1-SDT	325	Pavir.Cb01888.1	30268423	Pavir.Cb01888.1.p|PACid:30268423	-0.06207	0.957888740043576	0.1719	28	AT1G79500.1	Aldolase-type TIM barrel family protein	Cell wall synthesis / modification
RT1-SDT	7217	Pavir.J00161.1	30282764	Pavir.J00161.1.p|PACid:30282764	0.2586	1.19631722767916	0.1532	2	AT1G80170.1	Pectin lyase-like superfamily protein	Cell wall synthesis / modification
RT1-SDT	4526	Pavir.Fa00514.1	30188295	Pavir.Fa00514.1.p|PACid:30188295	-0.1437	0.905194673254291	0.1776	9	AT2G04780.1	FASCICLIN-like arabinoogalactan 7	Cell wall synthesis / modification
RT1-SDT	6429	Pavir.Ca00932.1	30206026	Pavir.Ca00932.1.p|PACid:30206026	-0.3764	0.770357490297056	0.1651	3	AT2G20520.1	FASCICLIN-like arabinogalactan 6	Cell wall synthesis / modification
RT1-SDT	342	Pavir.Ia03662.1	30214406	Pavir.Ia03662.1.p|PACid:30214406	0.61825	1.53501207027747	<.0001	21	AT2G28760.1	UDP-XYL synthase 6	Cell wall synthesis / modification
RT1-SDT	360	Pavir.Ib01205.1	30241015	Pavir.Ib01205.1.p|PACid:30241015	0.6409	1.55930159892601	<.0001	13	AT2G28760.1	UDP-XYL synthase 6	Cell wall synthesis / modification
RT1-SDT	5774	Pavir.Ba01006.1	30292665	Pavir.Ba01006.1.p|PACid:30292665	-0.03464	0.976275343284619	0.8002	5	AT2G36870.1	xyloglucan endotransglucosylase/hydrolase 32	Cell wall synthesis / modification
RT1-SDT	6647	Pavir.J16676.1	30267252	Pavir.J16676.1.p|PACid:30267252	-0.1677	0.890260838543108	0.3019	2	AT2G36870.1	xyloglucan endotransglucosylase/hydrolase 32	Cell wall synthesis / modification
RT1-SDT	4953	Pavir.Ia03611.1	30212831	Pavir.Ia03611.1.p|PACid:30212831	-0.4634	0.725274987112689	0.0058	3	AT2G37090.1	Nucleotide-diphospho-sugar transferases superfamily protein	Cell wall synthesis / modification
RT1-SDT	4213	Pavir.J35635.1	30195831	Pavir.J35635.1.p|PACid:30195831	-0.261	0.834509281155409	0.075	7	AT2G37090.1	Nucleotide-diphospho-sugar transferases superfamily protein	Cell wall synthesis / modification
RT1-SDT	6948	Pavir.J27018.1	30302250	Pavir.J27018.1.p|PACid:30302250	0.09879	1.07087493431836	0.7916	2	AT2G37090.1	Nucleotide-diphospho-sugar transferases superfamily protein	Cell wall synthesis / modification
RT1-SDT	4164	Pavir.Eb03703.1	30311049	Pavir.Eb03703.1.p|PACid:30311049	0.3381	1.26409071550774	0.003	9	AT2G39770.1	Glucose-1-phosphate adenylyltransferase family protein	Cell wall synthesis / modification
RT1-SDT	2437	Pavir.Bb01836.1	30300579	Pavir.Bb01836.1.p|PACid:30300579	0.3049	1.23533300740015	0.0278	8	AT2G45110.1	expansin B4	Cell wall synthesis / modification
RT1-SDT	3082	Pavir.J20825.1	30301774	Pavir.J20825.1.p|PACid:30301774	0.5929	1.50827552737029	<.0001	4	AT2G45110.1	expansin B4	Cell wall synthesis / modification
RT1-SDT	5261	Pavir.Aa00841.1	30252973	Pavir.Aa00841.1.p|PACid:30252973	1.4799	2.78929398687376	<.0001	2	AT2G45110.1	expansin B4	Cell wall synthesis / modification
RT1-SDT	1931	Pavir.Ga00516.1	30305119	Pavir.Ga00516.1.p|PACid:30305119	0.32754	1.25487181449263	<.0001	20	AT2G45790.1	phosphomannomutase	Cell wall synthesis / modification
RT1-SDT	3248	Pavir.Ia04971.1	30214778	Pavir.Ia04971.1.p|PACid:30214778	0.4714	1.38645423910397	<.0001	6	AT2G45790.1	phosphomannomutase	Cell wall synthesis / modification
RT1-SDT	5813	Pavir.Eb00901.1	30314167	Pavir.Eb00901.1.p|PACid:30314167	0.5246	1.43853467821131	0.0232	3	AT2G46630.1	N	Cell wall synthesis / modification
RT1-SDT	3793	Pavir.Gb00989.1	30223809	Pavir.Gb00989.1.p|PACid:30223809	0.25832	1.19608506751309	0.0151	5	AT3G03220.1	expansin A13	Cell wall synthesis / modification
RT1-SDT	6772	Pavir.Ga00945.1	30304568	Pavir.Ga00945.1.p|PACid:30304568	0.05586	1.03947855865229	0.7507	2	AT3G03220.1	expansin A13	Cell wall synthesis / modification
RT1-SDT	5438	Pavir.Ba00334.1	30290465	Pavir.Ba00334.1.p|PACid:30290465	0.2583	1.19606848636818	0.0203	5	AT3G05910.1	Pectinacetylesterase family protein	Cell wall synthesis / modification
RT1-SDT	5967	Pavir.Gb00552.1	30221379	Pavir.Gb00552.1.p|PACid:30221379	-0.022	0.984866442895551	0.9044	3	AT3G10700.1	galacturonic acid kinase	Cell wall synthesis / modification
RT1-SDT	2887	Pavir.Cb02121.1	30267871	Pavir.Cb02121.1.p|PACid:30267871	2.4814	5.58439116386165	<.0001	6	AT3G10740.1	alpha-L-arabinofuranosidase 1	Cell wall synthesis / modification
RT1-SDT	6206	Pavir.Ib01492.1	30242719	Pavir.Ib01492.1.p|PACid:30242719	1.5041	2.83647667412604	<.0001	3	AT3G10740.1	alpha-L-arabinofuranosidase 1	Cell wall synthesis / modification
RT1-SDT	3390	Pavir.Hb00172.1	30265406	Pavir.Hb00172.1.p|PACid:30265406	0.11749	1.08484580560563	0.2193	3	AT3G16850.1	Pectin lyase-like superfamily protein	Cell wall synthesis / modification
RT1-SDT	6535	Pavir.Ea00301.1	30230102	Pavir.Ea00301.1.p|PACid:30230102	-0.4998	0.70720481379584	0.0079	2	AT3G22440.1	FRIGIDA-like protein	Cell wall synthesis / modification
RT1-SDT	3836	Pavir.Eb00340.1	30311012	Pavir.Eb00340.1.p|PACid:30311012	0.0007771	1.00053878976911	0.9943	5	AT3G22440.1	FRIGIDA-like protein	Cell wall synthesis / modification
RT1-SDT	5627	Pavir.Ga00703.1	30303366	Pavir.Ga00703.1.p|PACid:30303366	-0.7536	0.593121675156959	0.0175	3	AT3G23730.1	xyloglucan endotransglucosylase/hydrolase 16	Cell wall synthesis / modification
RT1-SDT	7314	Pavir.Bb00412.1	30300308	Pavir.Bb00412.1.p|PACid:30300308	-0.3981	0.758857024703297	0.0142	2	AT3G24480.1	Leucine-rich repeat (LRR) family protein	Cell wall synthesis / modification
RT1-SDT	264	Pavir.Ia00394.1	30212391	Pavir.Ia00394.1.p|PACid:30212391	-0.13402	0.911288647406442	0.1257	10	AT3G29360.1	UDP-glucose 6-dehydrogenase family protein	Cell wall synthesis / modification
RT1-SDT	5994	Pavir.Ib00191.1	30237914	Pavir.Ib00191.1.p|PACid:30237914	0.6696	1.59063188956245	0.0004	2	AT3G45970.1	expansin-like A1	Cell wall synthesis / modification
RT1-SDT	6104	Pavir.J40016.1	30258230	Pavir.J40016.1.p|PACid:30258230	-0.5403	0.687627905998766	0.0039	3	AT3G46550.1	Fasciclin-like arabinogalactan family protein	Cell wall synthesis / modification
RT1-SDT	2337	Pavir.J12619.1	30281943	Pavir.J12619.1.p|PACid:30281943	0.44333	1.35973923114451	<.0001	13	AT3G47000.1	Glycosyl hydrolase family protein	Cell wall synthesis / modification
RT1-SDT	3617	Pavir.Ca01571.1	30204366	Pavir.Ca01571.1.p|PACid:30204366	0.5529	1.46703165375758	0.0052	4	AT3G47000.1	Glycosyl hydrolase family protein	Cell wall synthesis / modification
RT1-SDT	5535	Pavir.Ib00077.1	30241644	Pavir.Ib00077.1.p|PACid:30241644	0.62238	1.53941264178762	<.0001	3	AT3G48950.1	Pectin lyase-like superfamily protein	Cell wall synthesis / modification
RT1-SDT	5573	Pavir.J35014.1	30202789	Pavir.J35014.1.p|PACid:30202789	0.41376	1.3321531958823	<.0001	6	AT3G51160.1	NAD(P)-binding Rossmann-fold superfamily protein	Cell wall synthesis / modification
RT1-SDT	2264	Pavir.Ea03089.1	30227935	Pavir.Ea03089.1.p|PACid:30227935	0.2885	1.22136973381997	0.0203	4	AT3G53520.1	UDP-glucuronic acid decarboxylase 1	Cell wall synthesis / modification
RT1-SDT	3748	Pavir.J01857.1	30271007	Pavir.J01857.1.p|PACid:30271007	0.48143	1.39612682230468	<.0001	6	AT3G57790.1	Pectin lyase-like superfamily protein	Cell wall synthesis / modification
RT1-SDT	1737	Pavir.Ib00165.1	30240659	Pavir.Ib00165.1.p|PACid:30240659	-0.40859	0.753359300336316	<.0001	22	AT3G60900.1	FASCICLIN-like arabinogalactan-protein 10	Cell wall synthesis / modification
RT1-SDT	4711	Pavir.J04949.1	30256909	Pavir.J04949.1.p|PACid:30256909	0.2833	1.21697539524362	0.0205	4	AT3G60900.1	FASCICLIN-like arabinogalactan-protein 10	Cell wall synthesis / modification
RT1-SDT	623	Pavir.Eb02349.1	30313824	Pavir.Eb02349.1.p|PACid:30313824	0.0365	1.02562263001743	0.6102	13	AT3G62830.1	NAD(P)-binding Rossmann-fold superfamily protein	Cell wall synthesis / modification
RT1-SDT	3115	Pavir.Ga01327.1	30304198	Pavir.Ga01327.1.p|PACid:30304198	0.18872	1.13975204676929	0.0149	11	AT4G06744.1	Leucine-rich repeat (LRR) family protein	Cell wall synthesis / modification
RT1-SDT	3775	Pavir.J30654.1	30221015	Pavir.J30654.1.p|PACid:30221015	0.09184	1.06572853643684	0.4058	13	AT4G06744.1	Leucine-rich repeat (LRR) family protein	Cell wall synthesis / modification
RT1-SDT	6444	Pavir.Ab00369.2	30232205	Pavir.Ab00369.2.p|PACid:30232205	1.334	2.52100678316597	<.0001	2	AT4G16130.1	arabinose kinase	Cell wall synthesis / modification
RT1-SDT	4256	Pavir.Eb03139.1	30309779	Pavir.Eb03139.1.p|PACid:30309779	0.7524	1.684592910804	0.0042	5	AT4G18780.1	cellulose synthase family protein	Cell wall synthesis / modification
RT1-SDT	6551	Pavir.J28521.1	30284980	Pavir.J28521.1.p|PACid:30284980	-0.3916	0.762283735802174	0.0873	2	AT4G19410.1	Pectinacetylesterase family protein	Cell wall synthesis / modification
RT1-SDT	7694	Pavir.Eb01944.1	30309947	Pavir.Eb01944.1.p|PACid:30309947	-0.02638	0.981880937758832	0.8913	2	AT4G23820.1	Pectin lyase-like superfamily protein	Cell wall synthesis / modification
RT1-SDT	5797	Pavir.J14539.1	30270680	Pavir.J14539.1.p|PACid:30270680	1.0783	2.11154647337204	<.0001	4	AT4G23920.1	UDP-D-glucose/UDP-D-galactose 4-epimerase 2	Cell wall synthesis / modification
RT1-SDT	4399	Pavir.Ea02850.1	30227481	Pavir.Ea02850.1.p|PACid:30227481	-0.2457	0.843406473462347	0.3109	2	AT4G28300.1	Protein of unknown function (DUF1421)	Cell wall synthesis / modification
RT1-SDT	4757	Pavir.Eb02724.1	30314255	Pavir.Eb02724.1.p|PACid:30314255	-0.3435	0.788126982720564	0.0141	4	AT4G28300.1	Protein of unknown function (DUF1421)	Cell wall synthesis / modification
RT1-SDT	6056	Pavir.J12928.1	30302047	Pavir.J12928.1.p|PACid:30302047	-0.7925	0.577342765844346	0.0034	2	AT4G28300.2	Protein of unknown function (DUF1421)	Cell wall synthesis / modification
RT1-SDT	5073	Pavir.Gb00581.1	30224294	Pavir.Gb00581.1.p|PACid:30224294	-0.3991	0.758331207351636	0.0171	3	AT4G30270.1	xyloglucan endotransglucosylase/hydrolase 24	Cell wall synthesis / modification
RT1-SDT	5990	Pavir.Aa00232.1	30251507	Pavir.Aa00232.1.p|PACid:30251507	0.1985	1.14750465012532	0.2103	2	AT4G30440.1	UDP-D-glucuronate 4-epimerase 1	Cell wall synthesis / modification
RT1-SDT	1182	Pavir.Ca01073.1	30203745	Pavir.Ca01073.1.p|PACid:30203745	-0.7811	0.581922929979281	0.0136	4	AT4G32410.1	cellulose synthase 1	Cell wall synthesis / modification
RT1-SDT	3885	Pavir.J11851.1	30254627	Pavir.J11851.1.p|PACid:30254627	-0.5269	0.694044465336989	0.0199	2	AT4G39350.1	cellulose synthase A2	Cell wall synthesis / modification
RT1-SDT	4677	Pavir.Eb02706.1	30313968	Pavir.Eb02706.1.p|PACid:30313968	-0.3802	0.76833106995775	0.2081	3	AT5G03170.1	FASCICLIN-like arabinogalactan-protein 11	Cell wall synthesis / modification
RT1-SDT	273	Pavir.Bb03111.1	30296628	Pavir.Bb03111.1.p|PACid:30296628	0.15911	1.11659809508735	0.0362	10	AT5G06870.1	polygalacturonase inhibiting protein 2	Cell wall synthesis / modification
RT1-SDT	281	Pavir.J14304.1	30208804	Pavir.J14304.1.p|PACid:30208804	0.53925	1.45321685104457	<.0001	12	AT5G06870.1	polygalacturonase inhibiting protein 2	Cell wall synthesis / modification
RT1-SDT	3370	Pavir.Eb01373.1	30310176	Pavir.Eb01373.1.p|PACid:30310176	0.2408	1.1816477244216	0.1437	5	AT5G09730.1	beta-xylosidase 3	Cell wall synthesis / modification
RT1-SDT	2738	Pavir.J03458.1	30190988	Pavir.J03458.1.p|PACid:30190988	0.43604	1.35288574048775	<.0001	4	AT5G09760.1	Plant invertase/pectin methylesterase inhibitor superfamily	Cell wall synthesis / modification
RT1-SDT	2093	Pavir.Gb00725.1	30223909	Pavir.Gb00725.1.p|PACid:30223909	0.38572	1.30651165992049	<.0001	16	AT5G10560.1	Glycosyl hydrolase family protein	Cell wall synthesis / modification
RT1-SDT	4251	Pavir.Ha01388.1	30316141	Pavir.Ha01388.1.p|PACid:30316141	0.5082	1.42227456604227	<.0001	7	AT5G13870.1	xyloglucan endotransglucosylase/hydrolase 5	Cell wall synthesis / modification
RT1-SDT	1421	Pavir.Ia01436.1	30213433	Pavir.Ia01436.1.p|PACid:30213433	0.34004	1.26579168868137	<.0001	49	AT5G15650.1	reversibly glycosylated polypeptide 2	Cell wall synthesis / modification
RT1-SDT	1251	Pavir.Ga00131.1	30304649	Pavir.Ga00131.1.p|PACid:30304649	0.60342	1.51931393086878	<.0001	10	AT5G16510.1	Alpha-1,4-glucan-protein synthase family protein	Cell wall synthesis / modification
RT1-SDT	1334	Pavir.Gb00164.1	30222793	Pavir.Gb00164.1.p|PACid:30222793	0.58622	1.50130801809198	<.0001	11	AT5G16510.1	Alpha-1,4-glucan-protein synthase family protein	Cell wall synthesis / modification
RT1-SDT	3753	Pavir.Fb00422.1	30279090	Pavir.Fb00422.1.p|PACid:30279090	-0.4865	0.713754578485043	0.0005	12	AT5G16910.1	cellulose-synthase like D2	Cell wall synthesis / modification
RT1-SDT	4163	Pavir.J22394.1	30267393	Pavir.J22394.1.p|PACid:30267393	-0.3699	0.773836133145669	0.0102	6	AT5G16910.1	cellulose-synthase like D2	Cell wall synthesis / modification
RT1-SDT	1718	Pavir.J11877.1	30248082	Pavir.J11877.1.p|PACid:30248082	0.1747	1.12872966766484	0.1596	4	AT5G20950.1	Glycosyl hydrolase family protein	Cell wall synthesis / modification
RT1-SDT	1092	Pavir.Ia00554.1	30211554	Pavir.Ia00554.1.p|PACid:30211554	0.32762	1.25494140129078	<.0001	14	AT5G20950.1	Glycosyl hydrolase family protein	Cell wall synthesis / modification
RT1-SDT	2241	Pavir.Ca00931.1	30206419	Pavir.Ca00931.1.p|PACid:30206419	-0.4384	0.737952570577199	0.0839	5	AT5G44130.1	FASCICLIN-like arabinogalactan protein 13 precursor	Cell wall synthesis / modification
RT1-SDT	3017	Pavir.Ga01268.1	30305723	Pavir.Ga01268.1.p|PACid:30305723	-0.3454	0.78708971870589	0.0037	8	AT5G49720.1	glycosyl hydrolase 9A1	Cell wall synthesis / modification
RT1-SDT	5468	Pavir.Ib04298.1	30238505	Pavir.Ib04298.1.p|PACid:30238505	0.03729	1.02618440068546	0.8558	3	AT5G49720.1	glycosyl hydrolase 9A1	Cell wall synthesis / modification
RT1-SDT	2459	Pavir.Db00243.1	30263192	Pavir.Db00243.1.p|PACid:30263192	0.42385	1.34150273880489	<.0001	5	AT5G52560.1	UDP-sugar pyrophosphorylase	Cell wall synthesis / modification
RT1-SDT	2655	Pavir.J01317.1	30285246	Pavir.J01317.1.p|PACid:30285246	0.2809	1.21495257489113	0.1416	3	AT5G52560.1	UDP-sugar pyrophosphorylase	Cell wall synthesis / modification
RT1-SDT	2991	Pavir.J12989.1	30284734	Pavir.J12989.1.p|PACid:30284734	0.30904	1.23888304643936	0.0004	7	AT5G52560.1	UDP-sugar pyrophosphorylase	Cell wall synthesis / modification
RT1-SDT	3687	Pavir.Fa00989.1	30185565	Pavir.Fa00989.1.p|PACid:30185565	-0.1823	0.881296878317938	0.1259	4	AT5G55730.1	FASCICLIN-like arabinogalactan 1	Cell wall synthesis / modification
RT1-SDT	3117	Pavir.Fb01288.1	30281243	Pavir.Fb01288.1.p|PACid:30281243	-0.1169	0.922167035445455	0.322	5	AT5G55730.1	FASCICLIN-like arabinogalactan 1	Cell wall synthesis / modification
RT1-SDT	7094	Pavir.Fa01434.1	30187585	Pavir.Fa01434.1.p|PACid:30187585	-0.786	0.579949827252717	0.0014	2	AT5G57550.1	xyloglucan endotransglucosylase/hydrolase 25	Cell wall synthesis / modification
RT1-SDT	2261	Pavir.Fa01284.1	30188547	Pavir.Fa01284.1.p|PACid:30188547	-0.2809	0.823077394679054	0.2895	2	AT5G57560.1	Xyloglucan endotransglucosylase/hydrolase family protein	Cell wall synthesis / modification
RT1-SDT	5949	Pavir.Fb01417.1	30280855	Pavir.Fb01417.1.p|PACid:30280855	-0.03791	0.974065031986665	0.8949	2	AT5G57560.1	Xyloglucan endotransglucosylase/hydrolase family protein	Cell wall synthesis / modification
RT1-SDT	5711	Pavir.Da00153.1	30192727	Pavir.Da00153.1.p|PACid:30192727	0.05313	1.03751342178902	0.8098	4	AT5G57560.1	Xyloglucan endotransglucosylase/hydrolase family protein	Cell wall synthesis / modification
RT1-SDT	2342	Pavir.Fb01452.1	30279875	Pavir.Fb01452.1.p|PACid:30279875	-0.4697	0.722114741689104	0.0889	2	AT5G57560.1	Xyloglucan endotransglucosylase/hydrolase family protein	Cell wall synthesis / modification
RT1-SDT	358	Pavir.Ga00342.1	30303465	Pavir.Ga00342.1.p|PACid:30303465	0.14825	1.10822437187653	0.0002	45	AT5G64570.1	beta-D-xylosidase 4	Cell wall synthesis / modification
RT1-SDT	886	Pavir.J34947.1	30195916	Pavir.J34947.1.p|PACid:30195916	0.15046	1.10992331215295	0.1282	13	AT5G64570.1	beta-D-xylosidase 4	Cell wall synthesis / modification
RT1-SDT	3785	Pavir.J26736.1	30189338	Pavir.J26736.1.p|PACid:30189338	-0.1074	0.928259448456817	0.7051	2	AT5G64740.1	cellulose synthase 6	Cell wall synthesis / modification
RT1-SDT	2489	Pavir.Eb02512.1	30308767	Pavir.Eb02512.1.p|PACid:30308767	1.7697	3.40983043903837	<.0001	10	AT1G01470.1	Late embryogenesis abundant protein	Development
RT1-SDT	2763	Pavir.Ea00105.1	30227246	Pavir.Ea00105.1.p|PACid:30227246	2.1927	4.57160260477264	<.0001	3	AT1G01470.1	Late embryogenesis abundant protein	Development
RT1-SDT	7381	Pavir.Ba00884.1	30290536	Pavir.Ba00884.1.p|PACid:30290536	-0.08693	0.941524146469476	0.5561	2	AT1G02065.2	squamosa promoter binding protein-like 8	Development
RT1-SDT	2672	Pavir.J38371.1	30190416	Pavir.J38371.1.p|PACid:30190416	0.25568	1.19389834257707	<.0001	14	AT1G02140.1	mago nashi family protein	Development
RT1-SDT	676	Pavir.Ha01382.1	30317779	Pavir.Ha01382.1.p|PACid:30317779	-0.67223	0.627535943469102	<.0001	17	AT1G11430.1	plastid developmental protein DAG, putative	Development
RT1-SDT	3948	Pavir.Aa01891.1	30250455	Pavir.Aa01891.1.p|PACid:30250455	0.10316	1.07412358913271	0.2764	7	AT1G12910.1	Transducin/WD40 repeat-like superfamily protein	Development
RT1-SDT	5152	Pavir.J01054.1	30208402	Pavir.J01054.1.p|PACid:30208402	0.05928	1.04194563145523	0.814	3	AT1G13980.1	sec7 domain-containing protein	Development
RT1-SDT	4008	Pavir.Da00112.1	30193365	Pavir.Da00112.1.p|PACid:30193365	0.1443	1.1051942795965	0.266	7	AT1G15270.1	Translation machinery associated TMA7	Development
RT1-SDT	2136	Pavir.Fa01874.1	30186157	Pavir.Fa01874.1.p|PACid:30186157	0.6698	1.59085241324955	<.0001	4	AT1G15750.1	Transducin family protein / WD-40 repeat family protein	Development
RT1-SDT	589	Pavir.Ca00868.1	30203917	Pavir.Ca00868.1.p|PACid:30203917	0.2654	1.20196925997341	0.0476	3	AT1G18080.1	Transducin/WD40 repeat-like superfamily protein	Development
RT1-SDT	891	Pavir.Ea02583.1	30227042	Pavir.Ea02583.1.p|PACid:30227042	0.19631	1.1457640683022	0.0059	15	AT1G18080.1	Transducin/WD40 repeat-like superfamily protein	Development
RT1-SDT	1557	Pavir.Eb02984.1	30309835	Pavir.Eb02984.1.p|PACid:30309835	0.484	1.39861608273846	0.0016	6	AT1G18080.1	Transducin/WD40 repeat-like superfamily protein	Development
RT1-SDT	6576	Pavir.Ba01369.1	30288672	Pavir.Ba01369.1.p|PACid:30288672	-0.2615	0.83422011238974	0.2045	2	AT1G20640.1	Plant regulator RWP-RK family protein	Development
RT1-SDT	5674	Pavir.Fb01917.1	30278147	Pavir.Fb01917.1.p|PACid:30278147	-0.4476	0.733261653712541	0.0305	3	AT1G20980.1	squamosa promoter binding protein-like 14	Development
RT1-SDT	4387	Pavir.J19751.1	30274240	Pavir.J19751.1.p|PACid:30274240	1.6048	3.04153583085722	<.0001	4	AT1G28330.1	dormancy-associated protein-like 1	Development
RT1-SDT	4384	Pavir.Ib02350.1	30241555	Pavir.Ib02350.1.p|PACid:30241555	0.7498	1.68155970067538	0.0003	4	AT1G32400.1	tobamovirus multiplication 2A	Development
RT1-SDT	4974	Pavir.Ca00562.1	30205169	Pavir.Ca00562.1.p|PACid:30205169	0.4166	1.33477817289642	0.0097	3	AT1G48410.1	Stabilizer of iron transporter SufD / Polynucleotidyl transferase	Development
RT1-SDT	7194	Pavir.Aa00020.1	30250234	Pavir.Aa00020.1.p|PACid:30250234	0.09527	1.06826531491561	0.3945	3	AT1G48410.1	Stabilizer of iron transporter SufD / Polynucleotidyl transferase	Development
RT1-SDT	2444	Pavir.Ga01012.1	30305720	Pavir.Ga01012.1.p|PACid:30305720	-0.04491	0.96935028626652	0.8531	2	AT1G48410.1	Stabilizer of iron transporter SufD / Polynucleotidyl transferase	Development
RT1-SDT	1102	Pavir.Ca01850.1	30203800	Pavir.Ca01850.1.p|PACid:30203800	2.2	4.59479341998814	<.0001	10	AT1G52690.1	Late embryogenesis abundant protein (LEA) family protein	Development
RT1-SDT	2262	Pavir.J24821.1	30277014	Pavir.J24821.1.p|PACid:30277014	3.4782	11.1440366297875	<.0001	11	AT1G52690.1	Late embryogenesis abundant protein (LEA) family protein	Development
RT1-SDT	1663	Pavir.Aa02954.1	30250448	Pavir.Aa02954.1.p|PACid:30250448	0.0542	1.03828319718074	0.693	2	AT1G52730.1	Transducin/WD40 repeat-like superfamily protein	Development
RT1-SDT	700	Pavir.Db01621.1	30263223	Pavir.Db01621.1.p|PACid:30263223	-0.07642	0.94840817263748	0.0089	54	AT1G52730.1	Transducin/WD40 repeat-like superfamily protein	Development
RT1-SDT	2116	Pavir.Ba00252.1	30292039	Pavir.Ba00252.1.p|PACid:30292039	0.38692	1.30759883785053	<.0001	10	AT1G55540.1	Nuclear pore complex protein	Development
RT1-SDT	2885	Pavir.J19597.1	30258319	Pavir.J19597.1.p|PACid:30258319	-0.05678	0.96140752453238	0.4493	19	AT1G61040.1	plus-3 domain-containing protein	Development
RT1-SDT	6015	Pavir.Ab02904.1	30235664	Pavir.Ab02904.1.p|PACid:30235664	-0.84458	0.55687290336943	<.0001	5	AT1G70670.1	Caleosin-related family protein	Development
RT1-SDT	4320	Pavir.Aa00426.1	30250445	Pavir.Aa00426.1.p|PACid:30250445	-0.002998	0.997924102414648	0.9798	5	AT1G70680.1	Caleosin-related family protein	Development
RT1-SDT	6814	Pavir.Fa00218.1	30187068	Pavir.Fa00218.1.p|PACid:30187068	0.2844	1.21790364644717	0.1559	2	AT1G71840.1	transducin family protein / WD-40 repeat family protein	Development
RT1-SDT	4796	Pavir.Eb01266.1	30310117	Pavir.Eb01266.1.p|PACid:30310117	0.8569	1.8111424228583	<.0001	4	AT1G73720.1	transducin family protein / WD-40 repeat family protein	Development
RT1-SDT	3833	Pavir.J24796.1	30259611	Pavir.J24796.1.p|PACid:30259611	-0.008261	0.994290273941689	0.9298	7	AT1G75500.1	Walls Are Thin 1	Development
RT1-SDT	628	Pavir.Aa00724.1	30252876	Pavir.Aa00724.1.p|PACid:30252876	-0.21404	0.86211964165427	0.0272	11	AT1G79280.1	nuclear pore anchor	Development
RT1-SDT	656	Pavir.Ab02976.1	30232207	Pavir.Ab02976.1.p|PACid:30232207	0.02933	1.02053806897064	0.7001	11	AT1G79280.1	nuclear pore anchor	Development
RT1-SDT	4295	Pavir.J36724.1	30197606	Pavir.J36724.1.p|PACid:30197606	-0.2389	0.84739116959051	0.1235	3	AT1G79280.3	nuclear pore anchor	Development
RT1-SDT	3048	Pavir.Ib01069.1	30238175	Pavir.Ib01069.1.p|PACid:30238175	0.41029	1.32895292364132	<.0001	8	AT1G80490.2	TOPLESS-related 1	Development
RT1-SDT	3218	Pavir.Ia02723.1	30214198	Pavir.Ia02723.1.p|PACid:30214198	1.7537	3.37222313399937	<.0001	7	AT2G03440.1	nodulin-related protein 1	Development
RT1-SDT	1223	Pavir.Ib00720.1	30241982	Pavir.Ib00720.1.p|PACid:30241982	-0.16201	0.893778967131605	0.0038	33	AT2G03440.1	nodulin-related protein 1	Development
RT1-SDT	3615	Pavir.Ib01014.1	30241412	Pavir.Ib01014.1.p|PACid:30241412	0.6304	1.54799412915527	0.0149	2	AT2G17840.1	Senescence/dehydration-associated protein-related	Development
RT1-SDT	4690	Pavir.J05284.1	30196159	Pavir.J05284.1.p|PACid:30196159	0.3052	1.23558991438772	0.0191	2	AT2G17840.1	Senescence/dehydration-associated protein-related	Development
RT1-SDT	738	Pavir.J08344.1	30190603	Pavir.J08344.1.p|PACid:30190603	0.009506	1.00661081269183	0.8539	30	AT2G19520.1	Transducin family protein / WD-40 repeat family protein	Development
RT1-SDT	1935	Pavir.J34844.1	30295099	Pavir.J34844.1.p|PACid:30295099	0.2303	1.17307885876228	0.0106	19	AT2G19520.1	Transducin family protein / WD-40 repeat family protein	Development
RT1-SDT	3984	Pavir.Ha01893.1	30317160	Pavir.Ha01893.1.p|PACid:30317160	-0.7452	0.596585161518439	0.0075	3	AT2G19540.1	Transducin family protein / WD-40 repeat family protein	Development
RT1-SDT	3380	Pavir.Ca00095.1	30204910	Pavir.Ca00095.1.p|PACid:30204910	-0.7231	0.60579433829605	0.0339	3	AT2G19540.1	Transducin family protein / WD-40 repeat family protein	Development
RT1-SDT	4672	Pavir.Ib00828.1	30242876	Pavir.Ib00828.1.p|PACid:30242876	-0.4303	0.74210745236228	0.0201	6	AT2G20330.1	Transducin/WD40 repeat-like superfamily protein	Development
RT1-SDT	5710	Pavir.Ia04730.1	30212771	Pavir.Ia04730.1.p|PACid:30212771	-0.2576	0.836478288792943	0.122	4	AT2G20330.1	Transducin/WD40 repeat-like superfamily protein	Development
RT1-SDT	5536	Pavir.Hb00724.1	30264580	Pavir.Hb00724.1.p|PACid:30264580	0.2989	1.23020607040887	0.0688	4	AT2G26560.1	phospholipase A 2A	Development
RT1-SDT	3047	Pavir.Ab01802.1	30233146	Pavir.Ab01802.1.p|PACid:30233146	-0.5681	0.674504512459365	0.0005	3	AT2G27550.1	centroradialis	Development
RT1-SDT	4042	Pavir.Gb01907.1	30221387	Pavir.Gb01907.1.p|PACid:30221387	0.68675	1.60965331940825	<.0001	8	AT2G27550.1	centroradialis	Development
RT1-SDT	3208	Pavir.Hb01802.1	30266386	Pavir.Hb01802.1.p|PACid:30266386	0.6794	1.60147358252306	0.0147	2	AT2G27550.1	centroradialis	Development
RT1-SDT	684	Pavir.J40228.1	30243222	Pavir.J40228.1.p|PACid:30243222	1.26658	2.40590553844748	<.0001	36	AT2G28680.1	RmlC-like cupins superfamily protein	Development
RT1-SDT	5282	Pavir.Db00731.1	30261515	Pavir.Db00731.1.p|PACid:30261515	-0.2403	0.846569254930444	0.0517	3	AT2G33430.1	differentiation and greening-like 1	Development
RT1-SDT	2524	Pavir.Bb02409.1	30298298	Pavir.Bb02409.1.p|PACid:30298298	2.131	4.3802098831743	<.0001	10	AT2G33690.1	Late embryogenesis abundant protein, group 6	Development
RT1-SDT	2263	Pavir.Aa02486.1	30249505	Pavir.Aa02486.1.p|PACid:30249505	0.31955	1.24794123506125	<.0001	13	AT2G34040.1	Apoptosis inhibitory protein 5 (API5)	Development
RT1-SDT	3842	Pavir.Ab01405.1	30232928	Pavir.Ab01405.1.p|PACid:30232928	0.1532	1.11203330738235	0.2511	4	AT2G34040.1	Apoptosis inhibitory protein 5 (API5)	Development
RT1-SDT	5659	Pavir.Ga01132.1	30306045	Pavir.Ga01132.1.p|PACid:30306045	3.4579	10.9883281881692	<.0001	4	AT2G35300.1	Late embryogenesis abundant protein, group 1 protein	Development
RT1-SDT	3637	Pavir.J00999.1	30308562	Pavir.J00999.1.p|PACid:30308562	2.6013	6.06833192445643	<.0001	10	AT2G36640.1	embryonic cell protein 63	Development
RT1-SDT	5718	Pavir.Bb03722.1	30296861	Pavir.Bb03722.1.p|PACid:30296861	1.9467	3.85491754004474	<.0001	3	AT2G36640.1	embryonic cell protein 63	Development
RT1-SDT	4236	Pavir.Ib01068.1	30241680	Pavir.Ib01068.1.p|PACid:30241680	-0.1811	0.882030225401867	0.3055	3	AT2G39220.1	PATATIN-like protein 6	Development
RT1-SDT	3465	Pavir.Ib01134.1	30238496	Pavir.Ib01134.1.p|PACid:30238496	-0.5222	0.696309204690925	0.0149	3	AT2G39900.1	GATA type zinc finger transcription factor family protein	Development
RT1-SDT	3946	Pavir.J06864.1	30271480	Pavir.J06864.1.p|PACid:30271480	0.16162	1.11854244270612	0.0715	7	AT2G39900.1	GATA type zinc finger transcription factor family protein	Development
RT1-SDT	5034	Pavir.J11258.1	30316050	Pavir.J11258.1.p|PACid:30316050	-0.4052	0.755131602056789	0.0733	2	AT2G42200.1	squamosa promoter binding protein-like 9	Development
RT1-SDT	4793	Pavir.Fb01946.1	30281080	Pavir.Fb01946.1.p|PACid:30281080	-1.4887	0.356333493300529	<.0001	3	AT2G42200.1	squamosa promoter binding protein-like 9	Development
RT1-SDT	863	Pavir.Ia00023.1	30212357	Pavir.Ia00023.1.p|PACid:30212357	-0.07831	0.947166525731518	0.473	4	AT2G44060.1	Late embryogenesis abundant protein, group 2	Development
RT1-SDT	799	Pavir.J36770.1	30284795	Pavir.J36770.1.p|PACid:30284795	0.07531	1.0535874018862	0.4501	8	AT2G44060.1	Late embryogenesis abundant protein, group 2	Development
RT1-SDT	2474	Pavir.J23425.1	30195700	Pavir.J23425.1.p|PACid:30195700	-0.19451	0.873869648457683	<.0001	48	AT2G46140.1	Late embryogenesis abundant protein	Development
RT1-SDT	7204	Pavir.Aa00332.1	30252986	Pavir.Aa00332.1.p|PACid:30252986	0.938	1.91587043644539	0.0001	2	AT3G03270.2	Adenine nucleotide alpha hydrolases-like superfamily protein	Development
RT1-SDT	7051	Pavir.Ga00600.1	30303394	Pavir.Ga00600.1.p|PACid:30303394	0.1196	1.08643359740981	0.5494	4	AT3G06790.2	plastid developmental protein DAG, putative	Development
RT1-SDT	2187	Pavir.J03103.1	30208254	Pavir.J03103.1.p|PACid:30208254	-0.4245	0.745096917732398	0.0567	3	AT3G09090.1	defective in exine formation protein (DEX1)	Development
RT1-SDT	1243	Pavir.Ab03037.1	30234572	Pavir.Ab03037.1.p|PACid:30234572	0.11847	1.08558297460619	0.1428	9	AT3G13290.1	varicose-related	Development
RT1-SDT	2348	Pavir.Aa02932.1	30250073	Pavir.Aa02932.1.p|PACid:30250073	-0.1921	0.875330654293931	0.2175	5	AT3G13870.1	Root hair defective 3 GTP-binding protein (RHD3)	Development
RT1-SDT	3123	Pavir.Aa02051.1	30251594	Pavir.Aa02051.1.p|PACid:30251594	0.04776	1.03365876730593	0.7964	3	AT3G13870.1	Root hair defective 3 GTP-binding protein (RHD3)	Development
RT1-SDT	253	Pavir.Ca01780.1	30206225	Pavir.Ca01780.1.p|PACid:30206225	2.9387	7.66720099253925	<.0001	44	AT3G15670.1	Late embryogenesis abundant protein (LEA) family protein	Development
RT1-SDT	233	Pavir.J00158.1	30282759	Pavir.J00158.1.p|PACid:30282759	3.32451	10.0179124261115	<.0001	70	AT3G15670.1	Late embryogenesis abundant protein (LEA) family protein	Development
RT1-SDT	5651	Pavir.Ea00910.1	30228773	Pavir.Ea00910.1.p|PACid:30228773	0.5921	1.50743939367375	0.0005	3	AT3G16830.1	TOPLESS-related 2	Development
RT1-SDT	1698	Pavir.Eb00631.1	30312828	Pavir.Eb00631.1.p|PACid:30312828	0.53964	1.45360974848123	<.0001	28	AT3G18060.1	transducin family protein / WD-40 repeat family protein	Development
RT1-SDT	4562	Pavir.Aa03352.1	30251275	Pavir.Aa03352.1.p|PACid:30251275	-0.02495	0.982854661101851	0.9241	3	AT3G19240.1	Vacuolar import/degradation, Vid27-related protein	Development
RT1-SDT	3150	Pavir.J08377.1	30287338	Pavir.J08377.1.p|PACid:30287338	-0.3164	0.803071307242177	0.1736	3	AT3G19240.1	Vacuolar import/degradation, Vid27-related protein	Development
RT1-SDT	6123	Pavir.Aa00238.1	30253808	Pavir.Aa00238.1.p|PACid:30253808	0.2926	1.22484568548845	0.0746	3	AT3G19240.1	Vacuolar import/degradation, Vid27-related protein	Development
RT1-SDT	5945	Pavir.Eb04028.1	30309228	Pavir.Eb04028.1.p|PACid:30309228	-0.1984	0.87151657033473	0.5223	2	AT3G19430.1	late embryogenesis abundant protein-related / LEA protein-related	Development
RT1-SDT	2122	Pavir.Fb00948.1	30279736	Pavir.Fb00948.1.p|PACid:30279736	3.8862	14.7864108488703	<.0001	6	AT3G22490.1	Seed maturation protein	Development
RT1-SDT	507	Pavir.Da01632.1	30191845	Pavir.Da01632.1.p|PACid:30191845	0.4929	1.40727082736405	0.0397	8	AT3G22490.1	Seed maturation protein	Development
RT1-SDT	770	Pavir.Ib00373.1	30239191	Pavir.Ib00373.1.p|PACid:30239191	1.2944	2.45274967244858	<.0001	21	AT3G22490.1	Seed maturation protein	Development
RT1-SDT	289	Pavir.J19600.1	30274742	Pavir.J19600.1.p|PACid:30274742	1.5578	2.94404556466902	<.0001	26	AT3G22490.1	Seed maturation protein	Development
RT1-SDT	4346	Pavir.J04066.1	30282719	Pavir.J04066.1.p|PACid:30282719	0.6233	1.5403946312292	0.0033	3	AT3G22490.1	Seed maturation protein	Development
RT1-SDT	6739	Pavir.Bb01472.1	30297470	Pavir.Bb01472.1.p|PACid:30297470	-0.0152	0.989519470380215	0.8908	8	AT3G44530.2	homolog of histone chaperone HIRA	Development
RT1-SDT	4872	Pavir.Ca00716.1	30203949	Pavir.Ca00716.1.p|PACid:30203949	0.7183	1.64524222035854	<.0001	3	AT3G45600.1	tetraspanin3	Development
RT1-SDT	4712	Pavir.J04683.1	30275732	Pavir.J04683.1.p|PACid:30275732	0.9699	1.95870482339583	0.0053	3	AT3G45600.1	tetraspanin3	Development
RT1-SDT	4152	Pavir.Ba02277.1	30293678	Pavir.Ba02277.1.p|PACid:30293678	-0.2911	0.817278677083842	0.062	5	AT3G48140.1	B12D protein	Development
RT1-SDT	6658	Pavir.Ia00746.1	30213560	Pavir.Ia00746.1.p|PACid:30213560	0.5718	1.48637691455415	0.0002	3	AT3G49660.1	Transducin/WD40 repeat-like superfamily protein	Development
RT1-SDT	3543	Pavir.Ca01448.1	30204925	Pavir.Ca01448.1.p|PACid:30204925	2.5053	5.67767394116187	<.0001	3	AT3G51810.1	Stress induced protein	Development
RT1-SDT	4513	Pavir.Eb00493.1	30309898	Pavir.Eb00493.1.p|PACid:30309898	2.3786	5.20031855183786	<.0001	6	AT3G51810.1	Stress induced protein	Development
RT1-SDT	6063	Pavir.Bb00533.1	30297950	Pavir.Bb00533.1.p|PACid:30297950	0.1498	1.10941566373903	0.1824	3	AT3G52190.1	phosphate transporter traffic facilitator1	Development
RT1-SDT	1809	Pavir.Ia03678.1	30215378	Pavir.Ia03678.1.p|PACid:30215378	3.1184	8.68424242455642	<.0001	17	AT3G53040.1	late embryogenesis abundant protein, putative / LEA protein, putative	Development
RT1-SDT	6498	Pavir.Ia00074.1	30215730	Pavir.Ia00074.1.p|PACid:30215730	0.58701	1.50213033887894	<.0001	3	AT4G00090.1	Transducin/WD40 repeat-like superfamily protein	Development
RT1-SDT	6992	Pavir.Eb02330.1	30312666	Pavir.Eb02330.1.p|PACid:30312666	-0.5303	0.692410736319337	0.0096	3	AT4G02380.1	senescence-associated gene 21	Development
RT1-SDT	6334	Pavir.Ea03105.1	30226669	Pavir.Ea03105.1.p|PACid:30226669	-0.6654	0.630513864615777	0.0014	2	AT4G03240.1	frataxin homolog	Development
RT1-SDT	1505	Pavir.Da02424.1	30191968	Pavir.Da02424.1.p|PACid:30191968	0.16503	1.12118939226409	0.097	8	AT4G12420.1	Cupredoxin superfamily protein	Development
RT1-SDT	7327	Pavir.Ia02087.1	30209428	Pavir.Ia02087.1.p|PACid:30209428	-0.5059	0.704220924639195	0.0075	2	AT4G12420.1	Cupredoxin superfamily protein	Development
RT1-SDT	1228	Pavir.Ba03030.1	30293582	Pavir.Ba03030.1.p|PACid:30293582	-0.30392	0.810048391007328	0.0008	13	AT4G16280.3	RNA binding;abscisic acid binding	Development
RT1-SDT	1178	Pavir.Bb01323.1	30299172	Pavir.Bb01323.1.p|PACid:30299172	-0.4605	0.726734348077706	0.0001	9	AT4G16280.4	RNA binding;abscisic acid binding	Development
RT1-SDT	5887	Pavir.J02158.1	30254137	Pavir.J02158.1.p|PACid:30254137	0.12219	1.08838577042289	0.1422	6	AT4G16440.1	ferredoxin hydrogenases	Development
RT1-SDT	6811	Pavir.J09187.1	30275910	Pavir.J09187.1.p|PACid:30275910	-0.1703	0.888657870742836	0.6194	2	AT4G17670.1	Protein of unknown function (DUF581)	Development
RT1-SDT	1745	Pavir.Ea03479.1	30230773	Pavir.Ea03479.1.p|PACid:30230773	0.51671	1.43068890450238	<.0001	9	AT4G21150.1	ribophorin II (RPN2) family protein	Development
RT1-SDT	1733	Pavir.J12616.1	30231781	Pavir.J12616.1.p|PACid:30231781	0.18372	1.13580880424606	0.0477	8	AT4G21150.1	ribophorin II (RPN2) family protein	Development
RT1-SDT	5963	Pavir.Ga01295.1	30303990	Pavir.Ga01295.1.p|PACid:30303990	3.6127	12.2329461889146	<.0001	2	AT4G26740.1	seed gene 1	Development
RT1-SDT	7211	Pavir.Ib03587.1	30237002	Pavir.Ib03587.1.p|PACid:30237002	0.5637	1.47805504640907	0.0134	2	AT4G30580.1	Phospholipid/glycerol acyltransferase family protein	Development
RT1-SDT	3709	Pavir.Fa01415.1	30187067	Pavir.Fa01415.1.p|PACid:30187067	-0.3518	0.783605810251582	0.003	6	AT4G30840.1	Transducin/WD40 repeat-like superfamily protein	Development
RT1-SDT	6601	Pavir.Fb00897.1	30278461	Pavir.Fb00897.1.p|PACid:30278461	0.06989	1.04963664977668	0.6834	3	AT4G30840.1	Transducin/WD40 repeat-like superfamily protein	Development
RT1-SDT	3473	Pavir.Eb02025.1	30313170	Pavir.Eb02025.1.p|PACid:30313170	0.37048	1.29278288172082	<.0001	13	AT4G32551.2	LisH dimerisation motif;WD40/YVTN repeat-like-containing domain	Development
RT1-SDT	5537	Pavir.Ba01202.1	30292301	Pavir.Ba01202.1.p|PACid:30292301	-1.3243	0.399342908566683	0.0005	2	AT4G35050.1	Transducin family protein / WD-40 repeat family protein	Development
RT1-SDT	5893	Pavir.J05059.1	30199634	Pavir.J05059.1.p|PACid:30199634	-0.5675	0.674785089340294	0.019	2	AT4G35770.1	Rhodanese/Cell cycle control phosphatase superfamily protein	Development
RT1-SDT	7141	Pavir.Aa03070.1	30253510	Pavir.Aa03070.1.p|PACid:30253510	0.995	1.99308052565574	0.0002	2	AT4G35770.1	Rhodanese/Cell cycle control phosphatase superfamily protein	Development
RT1-SDT	5435	Pavir.Cb00217.1	30269798	Pavir.Cb00217.1.p|PACid:30269798	0.004641	1.00322207582789	0.9775	3	AT4G36860.1	LIM domain-containing protein	Development
RT1-SDT	4886	Pavir.Ca02716.1	30207127	Pavir.Ca02716.1.p|PACid:30207127	0.634	1.55186170854971	0.0004	3	AT4G36860.1	LIM domain-containing protein	Development
RT1-SDT	4673	Pavir.Ca00106.1	30207112	Pavir.Ca00106.1.p|PACid:30207112	0.08499	1.06068038926652	0.4422	4	AT4G37750.1	Integrase-type DNA-binding superfamily protein	Development
RT1-SDT	1754	Pavir.Fa01222.1	30186751	Pavir.Fa01222.1.p|PACid:30186751	0.9679	1.9559913632059	<.0001	11	AT5G06760.1	Late Embryogenesis Abundant 4-5	Development
RT1-SDT	1131	Pavir.Fb01280.1	30278487	Pavir.Fb01280.1.p|PACid:30278487	1.9441	3.84797653082377	<.0001	20	AT5G06760.1	Late Embryogenesis Abundant 4-5	Development
RT1-SDT	4363	Pavir.Fb00084.1	30278196	Pavir.Fb00084.1.p|PACid:30278196	0.3435	1.26883106647112	0.012	4	AT5G08560.1	transducin family protein / WD-40 repeat family protein	Development
RT1-SDT	5610	Pavir.Ia00158.1	30213965	Pavir.Ia00158.1.p|PACid:30213965	0.33711	1.2632235741585	<.0001	7	AT5G08790.1	NAC (No Apical Meristem) domain transcriptional regulator superfamily protein	Development
RT1-SDT	4426	Pavir.Ia00763.1	30208949	Pavir.Ia00763.1.p|PACid:30208949	-0.3166	0.8029599856361	0.0027	8	AT5G14520.1	pescadillo-related	Development
RT1-SDT	1789	Pavir.Ga00434.1	30304797	Pavir.Ga00434.1.p|PACid:30304797	-0.4661	0.723918906215814	0.0222	6	AT5G16780.1	SART-1 family	Development
RT1-SDT	1354	Pavir.Gb00487.1	30222479	Pavir.Gb00487.1.p|PACid:30222479	-0.3665	0.775661983727288	0.0066	9	AT5G16780.1	SART-1 family	Development
RT1-SDT	5978	Pavir.Ba00441.1	30289459	Pavir.Ba00441.1.p|PACid:30289459	0.6437	1.56233084899717	0.0099	2	AT5G20520.1	alpha/beta-Hydrolases superfamily protein	Development
RT1-SDT	969	Pavir.J34391.1	30190005	Pavir.J34391.1.p|PACid:30190005	-0.3605	0.778894588583299	0.2278	2	AT5G22330.1	P-loop containing nucleoside triphosphate hydrolases superfamily protein	Development
RT1-SDT	1797	Pavir.Aa00927.1	30253186	Pavir.Aa00927.1.p|PACid:30253186	0.007044	1.00489446770619	0.9628	2	AT5G24520.1	Transducin/WD40 repeat-like superfamily protein	Development
RT1-SDT	1742	Pavir.Ab02709.1	30233011	Pavir.Ab02709.1.p|PACid:30233011	0.2953	1.22714012734023	0.0127	4	AT5G24520.1	Transducin/WD40 repeat-like superfamily protein	Development
RT1-SDT	6254	Pavir.Ab00499.1	30234328	Pavir.Ab00499.1.p|PACid:30234328	-0.5531	0.681554060276415	0.0014	4	AT5G43270.1	squamosa promoter binding protein-like 2	Development
RT1-SDT	1345	Pavir.Da00257.1	30191515	Pavir.Da00257.1.p|PACid:30191515	0.3346	1.26102772923155	0.0199	3	AT5G44730.1	Haloacid dehalogenase-like hydrolase (HAD) superfamily protein	Development
RT1-SDT	4126	Pavir.J39320.1	30287558	Pavir.J39320.1.p|PACid:30287558	0.1589	1.11643557388351	0.1478	5	AT5G49930.1	zinc knuckle (CCHC-type) family protein	Development
RT1-SDT	5443	Pavir.Cb00527.1	30267819	Pavir.Cb00527.1.p|PACid:30267819	0.2523	1.19110450683381	0.0685	4	AT5G49930.1	zinc knuckle (CCHC-type) family protein	Development
RT1-SDT	2042	Pavir.Ga02289.1	30306007	Pavir.Ga02289.1.p|PACid:30306007	0.12386	1.08964636713962	0.0032	19	AT5G55940.1	Uncharacterised protein family (UPF0172)	Development
RT1-SDT	3363	Pavir.Ia01197.1	30210143	Pavir.Ia01197.1.p|PACid:30210143	-0.5488	0.683588484888758	<.0001	9	AT5G58230.1	Transducin/WD40 repeat-like superfamily protein	Development
RT1-SDT	4102	Pavir.Ea00389.1	30228609	Pavir.Ea00389.1.p|PACid:30228609	1.55908	2.94665876455988	<.0001	5	AT5G62200.1	Embryo-specific protein 3, (ATS3)	Development
RT1-SDT	5316	Pavir.Bb01876.1	30301039	Pavir.Bb01876.1.p|PACid:30301039	0.11538	1.08326033431401	0.2256	4	AT5G66040.1	sulfurtransferase protein 16	Development
RT1-SDT	4949	Pavir.Aa03261.1	30252981	Pavir.Aa03261.1.p|PACid:30252981	-1.9588	0.257242335861616	<.0001	2	AT5G66170.3	sulfurtransferase 18	Development
RT1-SDT	5028	Pavir.Ab01208.1	30231998	Pavir.Ab01208.1.p|PACid:30231998	0.3682	1.29074141280376	0.0141	3	AT2G02560.2	cullin-associated and neddylation dissociated	Development
RT1-SDT	6304	Pavir.Ba03830.1	30289599	Pavir.Ba03830.1.p|PACid:30289599	0.4464	1.36263578513177	0.0201	3	AT2G34680.1	Outer arm dynein light chain 1 protein	Development
RT1-SDT	4041	Pavir.J22031.1	30243158	Pavir.J22031.1.p|PACid:30243158	0.1286	1.09323230710446	0.2244	5	AT2G47990.1	transducin family protein / WD-40 repeat family protein	Development
RT1-SDT	5737	Pavir.Aa01129.1	30248967	Pavir.Aa01129.1.p|PACid:30248967	0.5448	1.45881809509174	<.0001	5	AT3G05000.1	Transport protein particle (TRAPP) component	Development
RT1-SDT	1101	Pavir.Aa00678.1	30249996	Pavir.Aa00678.1.p|PACid:30249996	0.23863	1.17987170937339	0.0055	9	AT3G13300.2	Transducin/WD40 repeat-like superfamily protein	Development
RT1-SDT	1967	Pavir.Da01473.1	30194644	Pavir.Da01473.1.p|PACid:30194644	0.69388	1.61762814060134	<.0001	16	AT3G13300.2	Transducin/WD40 repeat-like superfamily protein	Development
RT1-SDT	1492	Pavir.Ib02613.1	30241369	Pavir.Ib02613.1.p|PACid:30241369	-0.21302	0.862729384490946	0.0004	27	AT3G50670.1	U1 small nuclear ribonucleoprotein-70K	Development
RT1-SDT	5811	Pavir.Aa00152.1	30250417	Pavir.Aa00152.1.p|PACid:30250417	0.41479	1.3331046150495	<.0001	6	AT5G13570.1	decapping 2	Development
RT1-SDT	5135	Pavir.Ga00053.1	30305392	Pavir.Ga00053.1.p|PACid:30305392	0.38888	1.30937650767781	<.0001	7	AT1G71230.1	COP9-signalosome 5B	Development
RT1-SDT	4756	Pavir.J13452.1	30272834	Pavir.J13452.1.p|PACid:30272834	-0.11881	0.920946976060757	0.2037	9	AT2G21150.1	XAP5 family protein	Development
RT1-SDT	5818	Pavir.Ia04250.1	30216005	Pavir.Ia04250.1.p|PACid:30216005	0.4125	1.33099024722374	0.0035	4	AT4G14110.1	COP9 signalosome, subunit CSN8	Development
RT1-SDT	5875	Pavir.Fb00168.1	30279308	Pavir.Fb00168.1.p|PACid:30279308	0.4362	1.35303578863789	0.0022	3	AT5G14250.1	Proteasome component (PCI) domain protein	Development
RT1-SDT	3285	Pavir.Fa00552.1	30186382	Pavir.Fa00552.1.p|PACid:30186382	0.5944	1.50984452828432	<.0001	5	AT5G56280.1	COP9 signalosome subunit 6A	Development
RT1-SDT	4699	Pavir.Ib00157.1	30239356	Pavir.Ib00157.1.p|PACid:30239356	0.06658	1.04723121086636	0.6879	3	AT1G01490.1	Heavy metal transport/detoxification superfamily protein	DNA repair
RT1-SDT	1693	Pavir.Da02164.1	30191837	Pavir.Da02164.1.p|PACid:30191837	-0.3201	0.801014353581252	0.0069	8	AT1G30480.1	D111/G-patch domain-containing protein	DNA repair
RT1-SDT	1448	Pavir.J08370.1	30190101	Pavir.J08370.1.p|PACid:30190101	-0.0671	0.954554847146471	0.5482	8	AT1G30480.1	D111/G-patch domain-containing protein	DNA repair
RT1-SDT	3661	Pavir.J13344.1	30190455	Pavir.J13344.1.p|PACid:30190455	-0.9886	0.503966590044855	<.0001	4	AT1G79650.1	Rad23 UV excision repair protein family	DNA repair
RT1-SDT	3690	Pavir.Aa03339.2	30250354	Pavir.Aa03339.2.p|PACid:30250354	-1.2149	0.43080293980544	0.0017	2	AT1G79650.2	Rad23 UV excision repair protein family	DNA repair
RT1-SDT	3871	Pavir.Aa03342.1	30252096	Pavir.Aa03342.1.p|PACid:30252096	-0.7201	0.60705536286786	0.0019	4	AT1G79650.2	Rad23 UV excision repair protein family	DNA repair
RT1-SDT	1488	Pavir.Da01911.1	30191959	Pavir.Da01911.1.p|PACid:30191959	-0.3705	0.773514370658592	0.0069	10	AT1G79650.4	Rad23 UV excision repair protein family	DNA repair
RT1-SDT	3681	Pavir.Fa00299.1	30185943	Pavir.Fa00299.1.p|PACid:30185943	0.62331	1.54040530846816	<.0001	14	AT2G24420.1	DNA repair ATPase-related	DNA repair
RT1-SDT	3113	Pavir.J24428.1	30216376	Pavir.J24428.1.p|PACid:30216376	0.6643	1.58479913730448	<.0001	4	AT2G24420.1	DNA repair ATPase-related	DNA repair
RT1-SDT	1918	Pavir.Db01201.1	30260965	Pavir.Db01201.1.p|PACid:30260965	-1.1701	0.444390536710958	0.0013	2	AT2G24490.1	replicon protein A2	DNA repair
RT1-SDT	997	Pavir.Ca00159.1	30206008	Pavir.Ca00159.1.p|PACid:30206008	-0.32814	0.79656279359926	<.0001	20	AT2G24490.1	replicon protein A2	DNA repair
RT1-SDT	2607	Pavir.Ea01927.1	30226019	Pavir.Ea01927.1.p|PACid:30226019	-0.2077	0.865916609096364	0.0654	10	AT3G04880.1	DNA-damage-repair/toleration protein (DRT102)	DNA repair
RT1-SDT	2273	Pavir.Eb01318.1	30311440	Pavir.Eb01318.1.p|PACid:30311440	-0.01092	0.992459406795162	0.8996	14	AT3G04880.1	DNA-damage-repair/toleration protein (DRT102)	DNA repair
RT1-SDT	5399	Pavir.Ea02944.1	30227322	Pavir.Ea02944.1.p|PACid:30227322	-0.233	0.850863729506541	0.3427	2	AT3G14890.2	phosphoesterase	DNA repair
RT1-SDT	5927	Pavir.Aa01474.1	30250030	Pavir.Aa01474.1.p|PACid:30250030	0.4982	1.41245019798755	0.0202	2	AT4G02460.1	DNA mismatch repair protein, putative	DNA repair
RT1-SDT	3458	Pavir.Ba00052.1	30291716	Pavir.Ba00052.1.p|PACid:30291716	-0.1092	0.927102013897067	0.2935	6	AT5G28740.1	Tetratricopeptide repeat (TPR)-like superfamily protein	DNA repair
RT1-SDT	3873	Pavir.Ba01810.1	30291041	Pavir.Ba01810.1.p|PACid:30291041	-0.5094	0.702514544708459	0.0039	5	AT5G38470.1	Rad23 UV excision repair protein family	DNA repair
RT1-SDT	5123	Pavir.J07462.1	30295183	Pavir.J07462.1.p|PACid:30295183	-1.03	0.489710148793463	<.0001	3	AT5G38470.1	Rad23 UV excision repair protein family	DNA repair
RT1-SDT	6305	Pavir.Eb03466.1	30313333	Pavir.Eb03466.1.p|PACid:30313333	-0.4014	0.75712320970757	0.0288	3	AT5G44680.1	DNA glycosylase superfamily protein	DNA repair
RT1-SDT	4221	Pavir.Bb00485.1	30297073	Pavir.Bb00485.1.p|PACid:30297073	-0.3726	0.772389255180598	0.0018	6	AT1G06760.1	winged-helix DNA-binding transcription factor family protein	DNA synthesis
RT1-SDT	3644	Pavir.J31192.1	30274917	Pavir.J31192.1.p|PACid:30274917	-0.65515	0.635009464583988	<.0001	21	AT1G06760.1	winged-helix DNA-binding transcription factor family protein	DNA synthesis
RT1-SDT	736	Pavir.J31286.1	30208476	Pavir.J31286.1.p|PACid:30208476	-0.6958	0.617366882737556	0.015	7	AT1G06760.1	winged-helix DNA-binding transcription factor family protein	DNA synthesis
RT1-SDT	2645	Pavir.Ia01612.1	30214868	Pavir.Ia01612.1.p|PACid:30214868	0.04317	1.03037536076889	0.7929	2	AT1G08130.1	DNA ligase 1	DNA synthesis
RT1-SDT	2073	Pavir.Ib03551.1	30242369	Pavir.Ib03551.1.p|PACid:30242369	0.1137	1.08199962563388	0.0948	7	AT1G08130.1	DNA ligase 1	DNA synthesis
RT1-SDT	3101	Pavir.Cb01014.1	30269585	Pavir.Cb01014.1.p|PACid:30269585	0.05984	1.04235015409937	0.7894	2	AT1G08880.1	Histone superfamily protein	DNA synthesis
RT1-SDT	6170	Pavir.Ba01304.1	30291521	Pavir.Ba01304.1.p|PACid:30291521	0.1338	1.09717982561535	0.2991	3	AT1G09815.1	polymerase delta 4	DNA synthesis
RT1-SDT	1763	Pavir.Fb01565.1	30279974	Pavir.Fb01565.1.p|PACid:30279974	-0.19852	0.871444082639025	<.0001	36	AT1G14900.1	high mobility group A	DNA synthesis
RT1-SDT	4610	Pavir.Gb02375.1	30224501	Pavir.Gb02375.1.p|PACid:30224501	-0.1417	0.906450409734633	0.326	3	AT1G18680.1	HNH endonuclease domain-containing protein	DNA synthesis
RT1-SDT	2308	Pavir.Aa01553.1	30251686	Pavir.Aa01553.1.p|PACid:30251686	-2.0189	0.246746239024714	<.0001	8	AT1G18800.1	NAP1-related protein 2	DNA synthesis
RT1-SDT	3966	Pavir.Ab00014.1	30234454	Pavir.Ab00014.1.p|PACid:30234454	0.14691	1.10719551187956	0.1419	7	AT1G20960.1	U5 small nuclear ribonucleoprotein helicase, putative	DNA synthesis
RT1-SDT	5133	Pavir.Ca00236.1	30204845	Pavir.Ca00236.1.p|PACid:30204845	0.1957	1.1452797189942	0.2367	2	AT1G21690.1	ATPase family associated with various cellular activities (AAA)	DNA synthesis
RT1-SDT	3067	Pavir.Hb01023.1	30264094	Pavir.Hb01023.1.p|PACid:30264094	-0.4871	0.713457798018871	<.0001	8	AT1G44900.1	minichromosome maintenance (MCM2/3/5) family protein	DNA synthesis
RT1-SDT	7019	Pavir.Da01937.1	30192193	Pavir.Da01937.1.p|PACid:30192193	0.0379	1.02661838348993	0.8174	2	AT1G48620.1	high mobility group A5	DNA synthesis
RT1-SDT	1751	Pavir.Ba00793.1	30290190	Pavir.Ba00793.1.p|PACid:30290190	0.42105	1.33890165896985	<.0001	8	AT1G51060.1	histone H2A 10	DNA synthesis
RT1-SDT	1122	Pavir.Bb02929.1	30300696	Pavir.Bb02929.1.p|PACid:30300696	0.30852	1.23843658819297	<.0001	19	AT1G51060.1	histone H2A 10	DNA synthesis
RT1-SDT	5040	Pavir.Bb02824.1	30300950	Pavir.Bb02824.1.p|PACid:30300950	-0.5769	0.670402762958218	<.0001	6	AT1G67630.1	DNA polymerase alpha 2	DNA synthesis
RT1-SDT	4371	Pavir.Ea00755.1	30229058	Pavir.Ea00755.1.p|PACid:30229058	0.5588	1.47304346447641	0.0004	2	AT1G68290.1	endonuclease 2	DNA synthesis
RT1-SDT	459	Pavir.Ib01658.1	30240366	Pavir.Ib01658.1.p|PACid:30240366	-0.1422	0.906136312393786	0.3592	3	AT1G77180.1	chromatin protein family	DNA synthesis
RT1-SDT	763	Pavir.J03846.1	30315800	Pavir.J03846.1.p|PACid:30315800	-0.4456	0.734278875129556	0.0007	7	AT1G77180.1	chromatin protein family	DNA synthesis
RT1-SDT	399	Pavir.J16382.1	30208607	Pavir.J16382.1.p|PACid:30208607	0.2104	1.15700893042953	0.0725	5	AT1G77180.1	chromatin protein family	DNA synthesis
RT1-SDT	1356	Pavir.J18371.1	30275969	Pavir.J18371.1.p|PACid:30275969	-0.247	0.842646829503152	0.3433	2	AT1G77180.1	chromatin protein family	DNA synthesis
RT1-SDT	7259	Pavir.J02606.1	30287893	Pavir.J02606.1.p|PACid:30287893	0.02522	1.01763486183306	0.8607	2	AT1G77470.1	replication factor C subunit 3	DNA synthesis
RT1-SDT	2295	Pavir.Aa00191.1	30249392	Pavir.Aa00191.1.p|PACid:30249392	-0.12505	0.916972262817031	0.1181	16	AT2G07690.1	Minichromosome maintenance (MCM2/3/5) family protein	DNA synthesis
RT1-SDT	6884	Pavir.Eb01425.1	30308791	Pavir.Eb01425.1.p|PACid:30308791	-0.05944	0.959636541883854	0.7367	2	AT2G16440.1	Minichromosome maintenance (MCM2/3/5) family protein	DNA synthesis
RT1-SDT	3184	Pavir.Db02350.1	30262521	Pavir.Db02350.1.p|PACid:30262521	2.0089	4.02475230975079	<.0001	9	AT2G18050.1	histone H1-3	DNA synthesis
RT1-SDT	4713	Pavir.Ga00983.1	30303340	Pavir.Ga00983.1.p|PACid:30303340	-0.2462	0.843114221699071	0.0359	3	AT2G18050.1	histone H1-3	DNA synthesis
RT1-SDT	3469	Pavir.J05562.1	30267394	Pavir.J05562.1.p|PACid:30267394	2.2103	4.62771494184442	<.0001	18	AT2G18050.1	histone H1-3	DNA synthesis
RT1-SDT	6698	Pavir.J36614.1	30270593	Pavir.J36614.1.p|PACid:30270593	-0.05487	0.96268118556099	0.8242	2	AT2G18050.1	histone H1-3	DNA synthesis
RT1-SDT	1548	Pavir.Da02211.1	30191504	Pavir.Da02211.1.p|PACid:30191504	-0.93305	0.523749911446627	<.0001	24	AT2G19480.1	nucleosome assembly protein 1;2	DNA synthesis
RT1-SDT	996	Pavir.J02374.1	30277039	Pavir.J02374.1.p|PACid:30277039	-0.95586	0.515534184719438	<.0001	10	AT2G19480.1	nucleosome assembly protein 1;2	DNA synthesis
RT1-SDT	1211	Pavir.Ca01759.1	30205205	Pavir.Ca01759.1.p|PACid:30205205	-0.935	0.523042469896265	<.0001	3	AT2G19480.1	nucleosome assembly protein 1;2	DNA synthesis
RT1-SDT	3176	Pavir.Db01937.1	30262987	Pavir.Db01937.1.p|PACid:30262987	-0.4243	0.745200217257964	<.0001	10	AT2G26280.1	CTC-interacting domain 7	DNA synthesis
RT1-SDT	3730	Pavir.Ib00492.1	30238055	Pavir.Ib00492.1.p|PACid:30238055	-0.1502	0.901125531427173	0.2912	3	AT2G26280.1	CTC-interacting domain 7	DNA synthesis
RT1-SDT	3664	Pavir.Ia04370.1	30211698	Pavir.Ia04370.1.p|PACid:30211698	-0.09242	0.937948099596453	0.6915	2	AT2G26280.1	CTC-interacting domain 7	DNA synthesis
RT1-SDT	275	Pavir.Fb02074.1	30279200	Pavir.Fb02074.1.p|PACid:30279200	0.07633	1.05433256223295	0.0204	79	AT2G28720.1	Histone superfamily protein	DNA synthesis
RT1-SDT	815	Pavir.J00248.1	30219009	Pavir.J00248.1.p|PACid:30219009	0.3193	1.24772500205981	0.0347	3	AT2G30620.1	winged-helix DNA-binding transcription factor family protein	DNA synthesis
RT1-SDT	5278	Pavir.Ea02828.1	30229898	Pavir.Ea02828.1.p|PACid:30229898	-0.0001923	0.999866716680189	0.9987	6	AT2G30800.1	helicase in vascular tissue and tapetum	DNA synthesis
RT1-SDT	6609	Pavir.J15980.1	30217869	Pavir.J15980.1.p|PACid:30217869	0.26361	1.20047886128779	0.0245	2	AT2G35920.1	RNA helicase family protein	DNA synthesis
RT1-SDT	4616	Pavir.Eb03474.1	30311436	Pavir.Eb03474.1.p|PACid:30311436	0.3306	1.25753626041124	0.008	3	AT2G41460.1	apurinic endonuclease-redox protein	DNA synthesis
RT1-SDT	7458	Pavir.J14332.1	30314342	Pavir.J14332.1.p|PACid:30314342	0.3809	1.30215392800845	0.1783	2	AT2G41460.1	apurinic endonuclease-redox protein	DNA synthesis
RT1-SDT	3168	Pavir.Ib01245.1	30240060	Pavir.Ib01245.1.p|PACid:30240060	-0.01674	0.988463774678136	0.8198	11	AT2G47330.1	P-loop containing nucleoside triphosphate hydrolases superfamily protein	DNA synthesis
RT1-SDT	6736	Pavir.Hb01118.1	30266664	Pavir.Hb01118.1.p|PACid:30266664	0.5521	1.46621838418095	0.0042	2	AT3G09100.2	mRNA capping enzyme family protein	DNA synthesis
RT1-SDT	6938	Pavir.J34848.1	30294368	Pavir.J34848.1.p|PACid:30294368	0.34709	1.27199235528087	0.0015	4	AT3G10690.1	DNA GYRASE A	DNA synthesis
RT1-SDT	7049	Pavir.J00153.1	30244799	Pavir.J00153.1.p|PACid:30244799	0.4355	1.35237945081985	0.0003	5	AT3G10690.1	DNA GYRASE A	DNA synthesis
RT1-SDT	7429	Pavir.J18969.1	30208044	Pavir.J18969.1.p|PACid:30208044	0.01285	1.00894672610426	0.9228	2	AT3G12530.1	PSF2	DNA synthesis
RT1-SDT	6607	Pavir.Cb01047.1	30270118	Pavir.Cb01047.1.p|PACid:30270118	-0.1576	0.896515231916046	0.2283	2	AT3G48425.1	DNAse I-like superfamily protein	DNA synthesis
RT1-SDT	1467	Pavir.Ib00365.1	30240835	Pavir.Ib00365.1.p|PACid:30240835	0.15823	1.11591721196458	0.0027	26	AT3G53110.1	P-loop containing nucleoside triphosphate hydrolases superfamily protein	DNA synthesis
RT1-SDT	727	Pavir.Ib00038.1	30238568	Pavir.Ib00038.1.p|PACid:30238568	0.9575	1.9419418486847	<.0001	60	AT3G53730.1	Histone superfamily protein	DNA synthesis
RT1-SDT	917	Pavir.Ib00396.1	30236817	Pavir.Ib00396.1.p|PACid:30236817	0.9734	1.96346243962748	<.0001	3	AT3G54560.1	histone H2A 11	DNA synthesis
RT1-SDT	5051	Pavir.Ia01974.1	30210753	Pavir.Ia01974.1.p|PACid:30210753	0.4455	1.36178599378571	0.004	4	AT3G58560.1	DNAse I-like superfamily protein	DNA synthesis
RT1-SDT	3006	Pavir.Aa01233.1	30250845	Pavir.Aa01233.1.p|PACid:30250845	0.2031	1.1511692815366	0.3779	2	AT4G00660.1	RNAhelicase-like 8	DNA synthesis
RT1-SDT	3148	Pavir.Ab02418.1	30235806	Pavir.Ab02418.1.p|PACid:30235806	0.2787	1.21310127670025	0.0776	4	AT4G00660.1	RNAhelicase-like 8	DNA synthesis
RT1-SDT	3317	Pavir.Ia01551.1	30215618	Pavir.Ia01551.1.p|PACid:30215618	0.07244	1.05149354969729	0.692	2	AT4G00660.1	RNAhelicase-like 8	DNA synthesis
RT1-SDT	5842	Pavir.Ea00288.1	30229051	Pavir.Ea00288.1.p|PACid:30229051	-0.3836	0.766522475801547	0.0188	3	AT4G09730.1	RH39	DNA synthesis
RT1-SDT	6745	Pavir.Ca00620.1	30206354	Pavir.Ca00620.1.p|PACid:30206354	-0.05478	0.962741242611707	0.7976	2	AT4G19130.1	Replication factor-A protein 1-related	DNA synthesis
RT1-SDT	855	Pavir.Ba00725.1	30289343	Pavir.Ba00725.1.p|PACid:30289343	0.61456	1.53109096646929	<.0001	18	AT4G27230.1	histone H2A 2	DNA synthesis
RT1-SDT	3365	Pavir.Ib01857.1	30239650	Pavir.Ib01857.1.p|PACid:30239650	1.27849	2.42584941885596	<.0001	10	AT4G40030.2	Histone superfamily protein	DNA synthesis
RT1-SDT	4772	Pavir.J05674.1	30255980	Pavir.J05674.1.p|PACid:30255980	0.7918	1.73123311453258	<.0001	4	AT4G40040.1	Histone superfamily protein	DNA synthesis
RT1-SDT	860	Pavir.J13091.1	30257954	Pavir.J13091.1.p|PACid:30257954	0.12765	1.09251266172325	0.0101	32	AT5G02560.1	histone H2A 12	DNA synthesis
RT1-SDT	2212	Pavir.J03092.1	30216516	Pavir.J03092.1.p|PACid:30216516	0.5673	1.48174788679759	0.0005	7	AT5G02560.1	histone H2A 12	DNA synthesis
RT1-SDT	6039	Pavir.Ea01132.1	30227908	Pavir.Ea01132.1.p|PACid:30227908	0.6111	1.52742336721156	0.013	3	AT5G04130.1	DNA GYRASE B2	DNA synthesis
RT1-SDT	5901	Pavir.J35147.1	30285073	Pavir.J35147.1.p|PACid:30285073	0.248	1.18755966607341	0.2279	2	AT5G04130.1	DNA GYRASE B2	DNA synthesis
RT1-SDT	1395	Pavir.J02066.3	30284620	Pavir.J02066.3.p|PACid:30284620	0.06283	1.04451267543964	0.4093	14	AT5G11170.1	DEAD/DEAH box RNA helicase family protein	DNA synthesis
RT1-SDT	3517	Pavir.J13043.1	30315818	Pavir.J13043.1.p|PACid:30315818	0.1971	1.14639164478815	0.1128	2	AT5G11170.2	DEAD/DEAH box RNA helicase family protein	DNA synthesis
RT1-SDT	3149	Pavir.Ea01942.1	30227590	Pavir.Ea01942.1.p|PACid:30227590	0.4389	1.355570362566	0.002	5	AT5G11200.1	DEAD/DEAH box RNA helicase family protein	DNA synthesis
RT1-SDT	2118	Pavir.J38531.1	30190997	Pavir.J38531.1.p|PACid:30190997	0.1057	1.07601635020848	0.4202	2	AT5G22010.1	replication factor C1	DNA synthesis
RT1-SDT	2021	Pavir.J28386.1	30217468	Pavir.J28386.1.p|PACid:30217468	0.1562	1.11434812156371	0.1417	3	AT5G22010.1	replication factor C1	DNA synthesis
RT1-SDT	4452	Pavir.Cb01353.1	30269813	Pavir.Cb01353.1.p|PACid:30269813	-0.8276	0.563465818490504	0.0001	5	AT5G41880.1	DNA primases;DNA primases	DNA synthesis
RT1-SDT	4614	Pavir.Ca00457.1	30203791	Pavir.Ca00457.1.p|PACid:30203791	-0.4252	0.74473548214487	0.0017	8	AT5G44635.1	minichromosome maintenance (MCM2/3/5) family protein	DNA synthesis
RT1-SDT	3289	Pavir.J04992.1	30258217	Pavir.J04992.1.p|PACid:30258217	-0.4207	0.747062059593614	0.0002	11	AT5G46280.1	Minichromosome maintenance (MCM2/3/5) family protein	DNA synthesis
RT1-SDT	2386	Pavir.Fa01932.1	30187271	Pavir.Fa01932.1.p|PACid:30187271	-0.3038	0.810115771740576	0.0516	5	AT5G55300.1	DNA topoisomerase I alpha	DNA synthesis
RT1-SDT	2221	Pavir.Fb00389.1	30280841	Pavir.Fb00389.1.p|PACid:30280841	-0.1256	0.916622751237337	0.4149	5	AT5G55300.1	DNA topoisomerase I alpha	DNA synthesis
RT1-SDT	5760	Pavir.J40601.1	30287049	Pavir.J40601.1.p|PACid:30287049	-0.1757	0.885337846269121	0.3363	2	AT5G55310.1	DNA topoisomerase 1 beta	DNA synthesis
RT1-SDT	105	Pavir.Ea00483.1	30230738	Pavir.Ea00483.1.p|PACid:30230738	-0.2016	0.869585626999752	0.0326	7	AT5G59910.1	Histone superfamily protein	DNA synthesis
RT1-SDT	2378	Pavir.Fb02055.1	30278309	Pavir.Fb02055.1.p|PACid:30278309	1.6856	3.21674148999903	0.0002	2	AT5G59910.1	Histone superfamily protein	DNA synthesis
RT1-SDT	107	Pavir.J04569.1	30247014	Pavir.J04569.1.p|PACid:30247014	0.1971	1.14639164478815	0.2286	3	AT5G59910.1	Histone superfamily protein	DNA synthesis
RT1-SDT	108	Pavir.Ea01592.1	30227297	Pavir.Ea01592.1.p|PACid:30227297	0.02033	1.01419143795893	0.8953	3	AT5G59910.1	Histone superfamily protein	DNA synthesis
RT1-SDT	4516	Pavir.Ea03529.1	30226561	Pavir.Ea03529.1.p|PACid:30226561	-0.01811	0.98752556351321	0.8917	3	AT5G62410.1	structural maintenance of chromosomes 2	DNA synthesis
RT1-SDT	4592	Pavir.J01579.1	30259232	Pavir.J01579.1.p|PACid:30259232	-0.1155	0.923062346255585	0.6373	2	AT5G62410.1	structural maintenance of chromosomes 2	DNA synthesis
RT1-SDT	2252	Pavir.Bb03211.1	30300287	Pavir.Bb03211.1.p|PACid:30300287	0.132	1.09581176644769	0.1985	6	AT5G67630.1	P-loop containing nucleoside triphosphate hydrolases superfamily protein	DNA synthesis
RT1-SDT	477	Pavir.Da01650.1	30193562	Pavir.Da01650.1.p|PACid:30193562	1.6251	3.08463545404274	<.0001	9	AT1G23800.1	aldehyde dehydrogenase 2B7	Fermentation
RT1-SDT	318	Pavir.Db01451.1	30260620	Pavir.Db01451.1.p|PACid:30260620	1.51884	2.8656054773055	<.0001	22	AT1G23800.1	aldehyde dehydrogenase 2B7	Fermentation
RT1-SDT	3955	Pavir.Ha00899.1	30316595	Pavir.Ha00899.1.p|PACid:30316595	0.53137	1.44530101873665	<.0001	9	AT1G44170.1	aldehyde dehydrogenase 3H1	Fermentation
RT1-SDT	4007	Pavir.J05596.1	30199232	Pavir.J05596.1.p|PACid:30199232	0.9475	1.9285278765039	0.0002	3	AT1G54100.1	aldehyde dehydrogenase 7B4	Fermentation
RT1-SDT	1142	Pavir.Hb01196.1	30265817	Pavir.Hb01196.1.p|PACid:30265817	-0.74678	0.595932155471036	<.0001	30	AT1G77120.1	alcohol dehydrogenase 1	Fermentation
RT1-SDT	779	Pavir.Hb01197.1	30264065	Pavir.Hb01197.1.p|PACid:30264065	1.05931	2.0839345966616	<.0001	60	AT1G77120.1	alcohol dehydrogenase 1	Fermentation
RT1-SDT	4701	Pavir.Da00645.1	30192796	Pavir.Da00645.1.p|PACid:30192796	-0.0738	0.950132090021303	0.4394	6	AT3G24503.1	aldehyde dehydrogenase 2C4	Fermentation
RT1-SDT	1636	Pavir.Ea01601.1	30230143	Pavir.Ea01601.1.p|PACid:30230143	1.396	2.63170905005802	<.0001	10	AT3G24503.1	aldehyde dehydrogenase 2C4	Fermentation
RT1-SDT	4244	Pavir.J12247.1	30296044	Pavir.J12247.1.p|PACid:30296044	-0.5605	0.678067122839494	0.0358	2	AT3G24503.1	aldehyde dehydrogenase 2C4	Fermentation
RT1-SDT	3279	Pavir.Eb01887.1	30309087	Pavir.Eb01887.1.p|PACid:30309087	1.3745	2.5927803643707	<.0001	8	AT3G24503.1	aldehyde dehydrogenase 2C4	Fermentation
RT1-SDT	4661	Pavir.Eb01951.1	30309444	Pavir.Eb01951.1.p|PACid:30309444	0.5169	1.43087733572639	0.0639	4	AT3G24503.1	aldehyde dehydrogenase 2C4	Fermentation
RT1-SDT	835	Pavir.Aa03577.1	30251625	Pavir.Aa03577.1.p|PACid:30251625	-0.05602	0.961914119611144	0.3972	14	AT4G17260.1	Lactate/malate dehydrogenase family protein	Fermentation
RT1-SDT	1319	Pavir.Ab00068.1	30236619	Pavir.Ab00068.1.p|PACid:30236619	0.08494	1.06064362952246	0.6073	2	AT4G17260.1	Lactate/malate dehydrogenase family protein	Fermentation
RT1-SDT	613	Pavir.J20457.1	30301725	Pavir.J20457.1.p|PACid:30301725	0.04611	1.03247725493898	0.1829	42	AT4G17260.1	Lactate/malate dehydrogenase family protein	Fermentation
RT1-SDT	2828	Pavir.J34376.1	30255019	Pavir.J34376.1.p|PACid:30255019	-0.8166	0.567778450864739	0.0024	3	AT4G33070.1	Thiamine pyrophosphate dependent pyruvate decarboxylase family protein	Fermentation
RT1-SDT	1260	Pavir.J08215.1	30287779	Pavir.J08215.1.p|PACid:30287779	-0.04963	0.966184089030226	0.734	3	AT5G01320.1	Thiamine pyrophosphate dependent pyruvate decarboxylase family protein	Fermentation
RT1-SDT	1222	Pavir.Eb00368.1	30311703	Pavir.Eb00368.1.p|PACid:30311703	0.91901	1.89081733960314	<.0001	9	AT5G17380.1	Thiamine pyrophosphate dependent pyruvate decarboxylase family protein	Fermentation
RT1-SDT	3028	Pavir.Da01997.1	30193286	Pavir.Da01997.1.p|PACid:30193286	-0.24939	0.841252038068016	0.0076	5	AT1G01800.1	NAD(P)-binding Rossmann-fold superfamily protein	Functional enzyme
RT1-SDT	4782	Pavir.Db01638.1	30261612	Pavir.Db01638.1.p|PACid:30261612	0.1286	1.09323230710446	0.5436	3	AT1G01800.1	NAD(P)-binding Rossmann-fold superfamily protein	Functional enzyme
RT1-SDT	5814	Pavir.J09365.1	30247646	Pavir.J09365.1.p|PACid:30247646	0.2801	1.21427904888801	0.0338	3	AT1G03520.1	Core-2/I-branching beta-1,6-N-acetylglucosaminyltransferase family protein	Functional enzyme
RT1-SDT	6572	Pavir.Da02246.1	30192132	Pavir.Da02246.1.p|PACid:30192132	-0.07956	0.946346223892987	0.4289	6	AT1G04870.2	protein arginine methyltransferase 10	Functional enzyme
RT1-SDT	4558	Pavir.Ba00881.1	30288447	Pavir.Ba00881.1.p|PACid:30288447	0.7841	1.72201773371486	<.0001	4	AT1G07250.1	UDP-glucosyl transferase 71C4	Functional enzyme
RT1-SDT	2803	Pavir.Eb03842.1	30309192	Pavir.Eb03842.1.p|PACid:30309192	-0.6001	0.659708226311911	0.0167	2	AT1G07440.1	NAD(P)-binding Rossmann-fold superfamily protein	Functional enzyme
RT1-SDT	4218	Pavir.Cb01684.1	30268766	Pavir.Cb01684.1.p|PACid:30268766	1.0433	2.06093642236614	<.0001	5	AT1G09010.1	glycoside hydrolase family 2 protein	Functional enzyme
RT1-SDT	6286	Pavir.Ca01125.1	30203998	Pavir.Ca01125.1.p|PACid:30203998	-0.09314	0.937480118404772	0.6696	2	AT1G09390.1	GDSL-like Lipase/Acylhydrolase superfamily protein	Functional enzyme
RT1-SDT	450	Pavir.Aa00741.1	30253578	Pavir.Aa00741.1.p|PACid:30253578	-0.07238	0.951067735968103	0.287	21	AT1G10290.1	dynamin-like protein 6	Functional enzyme
RT1-SDT	775	Pavir.Ab02963.1	30233340	Pavir.Ab02963.1.p|PACid:30233340	-0.1222	0.918785503933658	0.3387	4	AT1G10290.1	dynamin-like protein 6	Functional enzyme
RT1-SDT	219	Pavir.Da01210.1	30193057	Pavir.Da01210.1.p|PACid:30193057	0.21108	1.15755440365617	0.0003	22	AT1G10290.1	dynamin-like protein 6	Functional enzyme
RT1-SDT	6546	Pavir.J28031.1	30195091	Pavir.J28031.1.p|PACid:30195091	0.07722	1.05498318169838	0.6713	2	AT1G10310.1	NAD(P)-binding Rossmann-fold superfamily protein	Functional enzyme
RT1-SDT	5594	Pavir.Ea02497.1	30228113	Pavir.Ea02497.1.p|PACid:30228113	2.6257	6.17183716932915	<.0001	2	AT1G10360.1	glutathione S-transferase TAU 18	Functional enzyme
RT1-SDT	6161	Pavir.Eb02854.1	30311461	Pavir.Eb02854.1.p|PACid:30311461	2.0383	4.10761224803256	<.0001	2	AT1G10360.1	glutathione S-transferase TAU 18	Functional enzyme
RT1-SDT	5985	Pavir.Ib02481.1	30238001	Pavir.Ib02481.1.p|PACid:30238001	1.125	2.18101546533052	0.0004	2	AT1G10360.1	glutathione S-transferase TAU 18	Functional enzyme
RT1-SDT	3634	Pavir.Ib02489.1	30240800	Pavir.Ib02489.1.p|PACid:30240800	0.85216	1.80520164709277	<.0001	6	AT1G10360.1	glutathione S-transferase TAU 18	Functional enzyme
RT1-SDT	5196	Pavir.Ib02490.1	30238982	Pavir.Ib02490.1.p|PACid:30238982	0.7618	1.69560485222784	<.0001	5	AT1G10360.1	glutathione S-transferase TAU 18	Functional enzyme
RT1-SDT	2084	Pavir.J24327.1	30256877	Pavir.J24327.1.p|PACid:30256877	2.2816	4.86216886637517	<.0001	10	AT1G10370.1	Glutathione S-transferase family protein	Functional enzyme
RT1-SDT	3222	Pavir.Ia00123.1	30210641	Pavir.Ia00123.1.p|PACid:30210641	0.3393	1.26514259400958	0.1438	2	AT1G12740.1	cytochrome P450, family 87, subfamily A, polypeptide 2	Functional enzyme
RT1-SDT	2974	Pavir.Ib01948.1	30242504	Pavir.Ib01948.1.p|PACid:30242504	0.4801	1.39484034596502	0.007	3	AT1G12740.1	cytochrome P450, family 87, subfamily A, polypeptide 2	Functional enzyme
RT1-SDT	7228	Pavir.Ib03878.2	30241231	Pavir.Ib03878.2.p|PACid:30241231	1.08742	2.12493689844166	<.0001	2	AT1G13080.1	cytochrome P450, family 71, subfamily B, polypeptide 2	Functional enzyme
RT1-SDT	6729	Pavir.J29930.1	30200826	Pavir.J29930.1.p|PACid:30200826	0.9092	1.87800382319691	0.0289	2	AT1G13130.1	Cellulase (glycosyl hydrolase family 5) protein	Functional enzyme
RT1-SDT	1811	Pavir.Ca02490.1	30203577	Pavir.Ca02490.1.p|PACid:30203577	0.4021	1.32142999703159	0.085	3	AT1G13750.1	Purple acid phosphatases superfamily protein	Functional enzyme
RT1-SDT	1786	Pavir.J03245.1	30195944	Pavir.J03245.1.p|PACid:30195944	1.7652	3.39921119462402	<.0001	2	AT1G13750.1	Purple acid phosphatases superfamily protein	Functional enzyme
RT1-SDT	6654	Pavir.Bb00074.1	30301496	Pavir.Bb00074.1.p|PACid:30301496	0.6087	1.52488452946172	0.004	3	AT1G13900.1	Purple acid phosphatases superfamily protein	Functional enzyme
RT1-SDT	5415	Pavir.Gb01412.1	30221575	Pavir.Gb01412.1.p|PACid:30221575	0.2007	1.14925584215158	0.1206	4	AT1G14130.1	2-oxoglutarate (2OG) and Fe(II)-dependent oxygenase superfamily protein	Functional enzyme
RT1-SDT	5165	Pavir.J40718.1	30246951	Pavir.J40718.1.p|PACid:30246951	0.07571	1.05387955884072	0.5184	2	AT1G14130.1	2-oxoglutarate (2OG) and Fe(II)-dependent oxygenase superfamily protein	Functional enzyme
RT1-SDT	2469	Pavir.Ha00540.1	30316458	Pavir.Ha00540.1.p|PACid:30316458	0.02543	1.01778300046881	0.8762	2	AT1G14550.1	Peroxidase superfamily protein	Functional enzyme
RT1-SDT	5449	Pavir.Ib00991.1	30242423	Pavir.Ib00991.1.p|PACid:30242423	0.3777	1.29926885899888	0.0916	2	AT1G14700.1	purple acid phosphatase 3	Functional enzyme
RT1-SDT	793	Pavir.J03223.1	30245572	Pavir.J03223.1.p|PACid:30245572	0.1839	1.13595052396747	<.0001	30	AT1G14830.1	DYNAMIN-like 1C	Functional enzyme
RT1-SDT	5800	Pavir.Eb02533.1	30313491	Pavir.Eb02533.1.p|PACid:30313491	0.32571	1.25328106972931	0.0011	2	AT1G15390.1	peptide deformylase 1A	Functional enzyme
RT1-SDT	7196	Pavir.Eb03978.1	30310355	Pavir.Eb03978.1.p|PACid:30310355	0.6108	1.5271057814726	0.0656	3	AT1G16610.3	arginine/serine-rich 45	Functional enzyme
RT1-SDT	5796	Pavir.Da01688.1	30193724	Pavir.Da01688.1.p|PACid:30193724	1.2405	2.36280406646185	<.0001	3	AT1G17180.1	glutathione S-transferase TAU 25	Functional enzyme
RT1-SDT	3972	Pavir.Ia00507.1	30209195	Pavir.Ia00507.1.p|PACid:30209195	1.1315	2.19086410566536	<.0001	7	AT1G17180.1	glutathione S-transferase TAU 25	Functional enzyme
RT1-SDT	1302	Pavir.J02614.1	30306905	Pavir.J02614.1.p|PACid:30306905	1.60967	3.0518202690744	<.0001	36	AT1G17180.1	glutathione S-transferase TAU 25	Functional enzyme
RT1-SDT	7797	Pavir.J28708.1	30282406	Pavir.J28708.1.p|PACid:30282406	0.04268	1.03002546132219	0.7621	2	AT1G18480.1	Calcineurin-like metallo-phosphoesterase superfamily protein	Functional enzyme
RT1-SDT	6977	Pavir.Ib01926.1	30242043	Pavir.Ib01926.1.p|PACid:30242043	0.2708	1.20647665494876	0.0215	4	AT1G18580.1	galacturonosyltransferase 11	Functional enzyme
RT1-SDT	5425	Pavir.Ba00478.1	30292981	Pavir.Ba00478.1.p|PACid:30292981	0.1324	1.096115632105	0.5399	3	AT1G18650.1	plasmodesmata callose-binding protein 3	Functional enzyme
RT1-SDT	3589	Pavir.Ca01338.1	30205470	Pavir.Ca01338.1.p|PACid:30205470	0.0168	1.01171293811075	0.9416	3	AT1G18650.1	plasmodesmata callose-binding protein 3	Functional enzyme
RT1-SDT	4381	Pavir.J40090.1	30308401	Pavir.J40090.1.p|PACid:30308401	-0.29	0.817902058557781	0.358	2	AT1G18650.1	plasmodesmata callose-binding protein 3	Functional enzyme
RT1-SDT	6237	Pavir.Bb03271.1	30298357	Pavir.Bb03271.1.p|PACid:30298357	0.08541	1.06098922141917	0.7066	2	AT1G18650.1	plasmodesmata callose-binding protein 3	Functional enzyme
RT1-SDT	3164	Pavir.Bb00696.1	30297757	Pavir.Bb00696.1.p|PACid:30297757	-1.0592	0.479898097905167	<.0001	8	AT1G19715.3	Mannose-binding lectin superfamily protein	Functional enzyme
RT1-SDT	2784	Pavir.Aa00055.1	30250935	Pavir.Aa00055.1.p|PACid:30250935	-0.06067	0.958818732236855	0.7797	2	AT1G20270.1	2-oxoglutarate (2OG) and Fe(II)-dependent oxygenase superfamily protein	Functional enzyme
RT1-SDT	3940	Pavir.Ib01277.1	30241593	Pavir.Ib01277.1.p|PACid:30241593	-0.2024	0.869103560008966	0.2194	3	AT1G20270.1	2-oxoglutarate (2OG) and Fe(II)-dependent oxygenase superfamily protein	Functional enzyme
RT1-SDT	3202	Pavir.Aa00523.1	30249669	Pavir.Aa00523.1.p|PACid:30249669	0.60035	1.51608432625074	<.0001	11	AT1G22360.1	UDP-glucosyl transferase 85A2	Functional enzyme
RT1-SDT	3089	Pavir.J40631.1	30284112	Pavir.J40631.1.p|PACid:30284112	1.03269	2.04583529209678	<.0001	9	AT1G22360.1	UDP-glucosyl transferase 85A2	Functional enzyme
RT1-SDT	3338	Pavir.Hb01518.1	30264544	Pavir.Hb01518.1.p|PACid:30264544	0.96864	1.95699490508169	<.0001	11	AT1G22440.1	Zinc-binding alcohol dehydrogenase family protein	Functional enzyme
RT1-SDT	2005	Pavir.Ia04122.1	30214938	Pavir.Ia04122.1.p|PACid:30214938	-0.1365	0.909723483305892	0.2565	4	AT1G22440.1	Zinc-binding alcohol dehydrogenase family protein	Functional enzyme
RT1-SDT	1241	Pavir.Ib00563.1	30237287	Pavir.Ib00563.1.p|PACid:30237287	-0.40109	0.757285914511217	<.0001	22	AT1G22440.1	Zinc-binding alcohol dehydrogenase family protein	Functional enzyme
RT1-SDT	3697	Pavir.Hb01275.1	30265511	Pavir.Hb01275.1.p|PACid:30265511	0.05472	1.03865749982965	0.7479	4	AT1G26390.1	FAD-binding Berberine family protein	Functional enzyme
RT1-SDT	2927	Pavir.Ea03872.1	30229156	Pavir.Ea03872.1.p|PACid:30229156	0.253	1.19168257457405	0.1139	2	AT1G27440.1	Exostosin family protein	Functional enzyme
RT1-SDT	3072	Pavir.Ea03879.1	30229330	Pavir.Ea03879.1.p|PACid:30229330	0.2302	1.17299754994991	0.3087	2	AT1G27440.1	Exostosin family protein	Functional enzyme
RT1-SDT	2508	Pavir.Ia02079.1	30215843	Pavir.Ia02079.1.p|PACid:30215843	0.50151	1.41569452706204	<.0001	15	AT1G28590.1	GDSL-like Lipase/Acylhydrolase superfamily protein	Functional enzyme
RT1-SDT	5493	Pavir.Ha00585.1	30318056	Pavir.Ha00585.1.p|PACid:30318056	0.5238	1.43773720633282	0.008	2	AT1G30760.1	FAD-binding Berberine family protein	Functional enzyme
RT1-SDT	5321	Pavir.Ib02850.1	30241522	Pavir.Ib02850.1.p|PACid:30241522	-0.8797	0.543480433092553	<.0001	4	AT1G32860.1	Glycosyl hydrolase superfamily protein	Functional enzyme
RT1-SDT	509	Pavir.Ea01477.2	30231125	Pavir.Ea01477.2.p|PACid:30231125	1.1877	2.27789303065235	<.0001	27	AT1G44970.1	Peroxidase superfamily protein	Functional enzyme
RT1-SDT	3581	Pavir.J02529.1	30225526	Pavir.J02529.1.p|PACid:30225526	1.7085	3.26820844291904	<.0001	8	AT1G54870.1	NAD(P)-binding Rossmann-fold superfamily protein	Functional enzyme
RT1-SDT	6528	Pavir.J07378.1	30295157	Pavir.J07378.1.p|PACid:30295157	-0.3317	0.794599615262643	0.0235	3	AT1G56670.1	GDSL-like Lipase/Acylhydrolase superfamily protein	Functional enzyme
RT1-SDT	6480	Pavir.Ea03285.1	30226704	Pavir.Ea03285.1.p|PACid:30226704	0.2396	1.18066526612484	0.1364	2	AT1G58430.1	GDSL-like Lipase/Acylhydrolase family protein	Functional enzyme
RT1-SDT	801	Pavir.Aa00393.1	30252881	Pavir.Aa00393.1.p|PACid:30252881	-0.001847	0.998720576318761	0.987	5	AT1G59610.1	dynamin-like 3	Functional enzyme
RT1-SDT	1502	Pavir.J04680.1	30198661	Pavir.J04680.1.p|PACid:30198661	0.1038	1.07460019131056	0.4112	3	AT1G59610.1	dynamin-like 3	Functional enzyme
RT1-SDT	314	Pavir.J26376.1	30296147	Pavir.J26376.1.p|PACid:30296147	0.38167	1.30284910343699	0.0003	6	AT1G59610.1	dynamin-like 3	Functional enzyme
RT1-SDT	4837	Pavir.Ib02389.1	30238908	Pavir.Ib02389.1.p|PACid:30238908	0.55393	1.46807940264907	<.0001	4	AT1G59670.1	glutathione S-transferase TAU 15	Functional enzyme
RT1-SDT	4052	Pavir.Ca02452.1	30206739	Pavir.Ca02452.1.p|PACid:30206739	0.9332	1.90950672377208	<.0001	8	AT1G60500.1	Dynamin related protein 4C	Functional enzyme
RT1-SDT	1987	Pavir.J02317.1	30247733	Pavir.J02317.1.p|PACid:30247733	-0.01618	0.988847533645685	0.7341	19	AT1G62770.1	Plant invertase/pectin methylesterase inhibitor superfamily protein	Functional enzyme
RT1-SDT	1231	Pavir.Db00191.1	30260944	Pavir.Db00191.1.p|PACid:30260944	-0.49136	0.711354202131161	<.0001	23	AT1G62790.2	Bifunctional inhibitor/lipid-transfer protein/seed storage 2S albumin superfamily protein	Functional enzyme
RT1-SDT	4652	Pavir.J15893.1	30270822	Pavir.J15893.1.p|PACid:30270822	-0.5388	0.688343218813599	0.0261	3	AT1G62790.2	Bifunctional inhibitor/lipid-transfer protein/seed storage 2S albumin superfamily protein	Functional enzyme
RT1-SDT	3631	Pavir.J31800.1	30276652	Pavir.J31800.1.p|PACid:30276652	-0.4488	0.732651997399163	0.0821	2	AT1G65610.1	Six-hairpin glycosidases superfamily protein	Functional enzyme
RT1-SDT	6457	Pavir.Ia00847.1	30214209	Pavir.Ia00847.1.p|PACid:30214209	0.01638	1.01141844927125	0.8694	3	AT1G65820.1	microsomal glutathione s-transferase, putative	Functional enzyme
RT1-SDT	6646	Pavir.J00651.1	30245185	Pavir.J00651.1.p|PACid:30245185	0.2369	1.17845772051601	0.1104	2	AT1G67490.1	glucosidase 1	Functional enzyme
RT1-SDT	2244	Pavir.J22143.1	30198040	Pavir.J22143.1.p|PACid:30198040	0.31252	1.24187502799764	0.0003	8	AT1G68560.1	alpha-xylosidase 1	Functional enzyme
RT1-SDT	3215	Pavir.J22194.1	30244350	Pavir.J22194.1.p|PACid:30244350	0.5049	1.41902499347409	0.0006	5	AT1G68560.1	alpha-xylosidase 1	Functional enzyme
RT1-SDT	6614	Pavir.Db00016.1	30261755	Pavir.Db00016.1.p|PACid:30261755	-0.1923	0.875209316109631	0.3314	2	AT1G71691.1	GDSL-like Lipase/Acylhydrolase superfamily protein	Functional enzyme
RT1-SDT	6747	Pavir.J06759.1	30284670	Pavir.J06759.1.p|PACid:30284670	-0.5756	0.671007129332455	0.0039	4	AT1G71691.1	GDSL-like Lipase/Acylhydrolase superfamily protein	Functional enzyme
RT1-SDT	1024	Pavir.Ea01261.1	30231507	Pavir.Ea01261.1.p|PACid:30231507	1.4999	2.82823107991197	<.0001	16	AT1G71695.1	Peroxidase superfamily protein	Functional enzyme
RT1-SDT	1104	Pavir.Eb01281.1	30308897	Pavir.Eb01281.1.p|PACid:30308897	1.27	2.41161565538152	<.0001	4	AT1G71695.1	Peroxidase superfamily protein	Functional enzyme
RT1-SDT	6147	Pavir.Eb03999.1	30313144	Pavir.Eb03999.1.p|PACid:30313144	1.8941	3.71690032397288	<.0001	2	AT1G71695.1	Peroxidase superfamily protein	Functional enzyme
RT1-SDT	1374	Pavir.Ga00258.1	30303361	Pavir.Ga00258.1.p|PACid:30303361	0.4734	1.38837760566567	<.0001	27	AT1G71695.1	Peroxidase superfamily protein	Functional enzyme
RT1-SDT	1051	Pavir.Gb00171.1	30222267	Pavir.Gb00171.1.p|PACid:30222267	-0.38396	0.766331227022521	<.0001	18	AT1G71695.1	Peroxidase superfamily protein	Functional enzyme
RT1-SDT	3076	Pavir.J15786.1	30195529	Pavir.J15786.1.p|PACid:30195529	2.5828	5.99101314935143	<.0001	9	AT1G71695.1	Peroxidase superfamily protein	Functional enzyme
RT1-SDT	890	Pavir.J25062.1	30270685	Pavir.J25062.1.p|PACid:30270685	1.04039	2.05678358312647	<.0001	26	AT1G71695.1	Peroxidase superfamily protein	Functional enzyme
RT1-SDT	4693	Pavir.Ga00397.1	30304273	Pavir.Ga00397.1.p|PACid:30304273	0.4538	1.36964309395419	0.0225	4	AT1G72230.1	Cupredoxin superfamily protein	Functional enzyme
RT1-SDT	5950	Pavir.Da01328.1	30192161	Pavir.Da01328.1.p|PACid:30192161	0.2073	1.15452546937948	0.52	2	AT1G72230.1	Cupredoxin superfamily protein	Functional enzyme
RT1-SDT	1732	Pavir.Ea02596.1	30227132	Pavir.Ea02596.1.p|PACid:30227132	0.14348	1.10456628699777	0.0734	13	AT1G72880.1	Survival protein SurE-like phosphatase/nucleotidase	Functional enzyme
RT1-SDT	3007	Pavir.Eb02632.1	30313988	Pavir.Eb02632.1.p|PACid:30313988	-0.06022	0.959117850009687	0.633	6	AT1G72880.1	Survival protein SurE-like phosphatase/nucleotidase	Functional enzyme
RT1-SDT	5329	Pavir.J06442.1	30225856	Pavir.J06442.1.p|PACid:30225856	0.02636	1.01843930225896	0.8791	3	AT1G73880.1	UDP-glucosyl transferase 89B1	Functional enzyme
RT1-SDT	5653	Pavir.Bb02664.1	30301482	Pavir.Bb02664.1.p|PACid:30301482	0.3698	1.29217368491105	0.0507	3	AT1G75680.1	glycosyl hydrolase 9B7	Functional enzyme
RT1-SDT	5248	Pavir.Ga00778.1	30306065	Pavir.Ga00778.1.p|PACid:30306065	0.35801	1.28165680789743	0.0019	3	AT1G78800.1	UDP-Glycosyltransferase superfamily protein	Functional enzyme
RT1-SDT	6559	Pavir.Ea04161.1	30226962	Pavir.Ea04161.1.p|PACid:30226962	0.403	1.32225460514257	0.0403	3	AT1G78860.1	D-mannose binding lectin protein with Apple-like carbohydrate-binding domain	Functional enzyme
RT1-SDT	5987	Pavir.Eb01926.1	30312956	Pavir.Eb01926.1.p|PACid:30312956	0.5589	1.47314557160756	0.0011	2	AT1G80410.1	tetratricopeptide repeat (TPR)-containing protein	Functional enzyme
RT1-SDT	3914	Pavir.J10651.1	30276594	Pavir.J10651.1.p|PACid:30276594	0.2564	1.19449432531648	0.0464	4	AT1G80410.1	tetratricopeptide repeat (TPR)-containing protein	Functional enzyme
RT1-SDT	4527	Pavir.Ab01067.1	30234647	Pavir.Ab01067.1.p|PACid:30234647	-0.4313	0.741593240906701	0.0022	6	AT2G01490.1	phytanoyl-CoA dioxygenase (PhyH) family protein	Functional enzyme
RT1-SDT	5559	Pavir.Ib04348.1	30239422	Pavir.Ib04348.1.p|PACid:30239422	-0.9209	0.528179422014851	<.0001	6	AT2G01490.1	phytanoyl-CoA dioxygenase (PhyH) family protein	Functional enzyme
RT1-SDT	3945	Pavir.Ib04350.1	30240128	Pavir.Ib04350.1.p|PACid:30240128	-0.12174	0.919078503289794	0.1037	6	AT2G01490.1	phytanoyl-CoA dioxygenase (PhyH) family protein	Functional enzyme
RT1-SDT	2022	Pavir.Ia04703.1	30215538	Pavir.Ia04703.1.p|PACid:30215538	-0.4664	0.723768387161496	0.0006	10	AT2G01630.1	O-Glycosyl hydrolases family 17 protein	Functional enzyme
RT1-SDT	5863	Pavir.Aa01645.1	30252357	Pavir.Aa01645.1.p|PACid:30252357	1.1105	2.15920466666276	<.0001	5	AT2G02380.1	glutathione S-transferase (class zeta) 2	Functional enzyme
RT1-SDT	4339	Pavir.Ia00797.1	30210919	Pavir.Ia00797.1.p|PACid:30210919	1.8919	3.71123665364726	<.0001	5	AT2G02850.1	plantacyanin	Functional enzyme
RT1-SDT	2343	Pavir.Ia04103.1	30213913	Pavir.Ia04103.1.p|PACid:30213913	0.417	1.33514830329591	0.0066	7	AT2G02850.1	plantacyanin	Functional enzyme
RT1-SDT	3097	Pavir.Aa00341.1	30250350	Pavir.Aa00341.1.p|PACid:30250350	-0.22544	0.855334122027352	0.003	9	AT2G05790.1	O-Glycosyl hydrolases family 17 protein	Functional enzyme
RT1-SDT	3578	Pavir.Ab01247.1	30236234	Pavir.Ab01247.1.p|PACid:30236234	1.1616	2.23705387304559	<.0001	8	AT2G15480.2	UDP-glucosyl transferase 73B5	Functional enzyme
RT1-SDT	4951	Pavir.J40142.1	30202468	Pavir.J40142.1.p|PACid:30202468	0.7667	1.70137363152545	0.0061	3	AT2G15480.2	UDP-glucosyl transferase 73B5	Functional enzyme
RT1-SDT	5953	Pavir.Bb01984.1	30296908	Pavir.Bb01984.1.p|PACid:30296908	0.7642	1.69842792868017	<.0001	3	AT2G16890.2	UDP-Glycosyltransferase superfamily protein	Functional enzyme
RT1-SDT	4239	Pavir.Db01426.1	30261195	Pavir.Db01426.1.p|PACid:30261195	1.0185	2.02581158584617	0.0006	2	AT2G16890.2	UDP-Glycosyltransferase superfamily protein	Functional enzyme
RT1-SDT	2493	Pavir.Eb01073.1	30313315	Pavir.Eb01073.1.p|PACid:30313315	0.83	1.77768536233314	0.0029	2	AT2G18150.1	Peroxidase superfamily protein	Functional enzyme
RT1-SDT	1341	Pavir.Db00276.1	30260629	Pavir.Db00276.1.p|PACid:30260629	0.3525	1.2767711873336	<.0001	19	AT2G18980.1	Peroxidase superfamily protein	Functional enzyme
RT1-SDT	2226	Pavir.Gb00192.1	30224230	Pavir.Gb00192.1.p|PACid:30224230	-0.02264	0.984429639054109	0.8404	11	AT2G18980.1	Peroxidase superfamily protein	Functional enzyme
RT1-SDT	3942	Pavir.J16621.1	30201576	Pavir.J16621.1.p|PACid:30201576	-0.2338	0.850392041262259	0.2443	2	AT2G18980.1	Peroxidase superfamily protein	Functional enzyme
RT1-SDT	7453	Pavir.Ba03746.1	30290485	Pavir.Ba03746.1.p|PACid:30290485	0.4677	1.3829030325086	0.0032	2	AT2G19440.1	O-Glycosyl hydrolases family 17 protein	Functional enzyme
RT1-SDT	6019	Pavir.J01153.1	30267268	Pavir.J01153.1.p|PACid:30267268	-0.1864	0.878795873178343	0.1499	5	AT2G19440.1	O-Glycosyl hydrolases family 17 protein	Functional enzyme
RT1-SDT	5208	Pavir.Ea02890.1	30229130	Pavir.Ea02890.1.p|PACid:30229130	-0.12	0.920187650624875	0.2728	4	AT2G20680.1	Glycosyl hydrolase superfamily protein	Functional enzyme
RT1-SDT	3227	Pavir.Bb02402.1	30297818	Pavir.Bb02402.1.p|PACid:30297818	1.51562	2.85921676747656	<.0001	8	AT2G22420.1	Peroxidase superfamily protein	Functional enzyme
RT1-SDT	7679	Pavir.J28015.1	30201332	Pavir.J28015.1.p|PACid:30201332	0.3703	1.29262159579685	0.0174	2	AT2G23610.1	methyl esterase 3	Functional enzyme
RT1-SDT	5092	Pavir.Fa01161.1	30187756	Pavir.Fa01161.1.p|PACid:30187756	-0.2926	0.81642937706166	0.1038	3	AT2G23990.1	early nodulin-like protein 11	Functional enzyme
RT1-SDT	6061	Pavir.Da00584.1	30192514	Pavir.Da00584.1.p|PACid:30192514	0.2792	1.21352177842828	0.1234	3	AT2G26600.1	Glycosyl hydrolase superfamily protein	Functional enzyme
RT1-SDT	2532	Pavir.J10149.1	30243555	Pavir.J10149.1.p|PACid:30243555	0.57247	1.48706736110468	<.0001	7	AT2G27035.1	early nodulin-like protein 20	Functional enzyme
RT1-SDT	5986	Pavir.J00696.1	30207420	Pavir.J00696.1.p|PACid:30207420	0.2851	1.21849472036611	0.1304	2	AT2G27500.2	Glycosyl hydrolase superfamily protein	Functional enzyme
RT1-SDT	4879	Pavir.Ia03885.1	30211299	Pavir.Ia03885.1.p|PACid:30211299	0.2649	1.20155276134945	0.1803	2	AT2G28470.1	beta-galactosidase 8	Functional enzyme
RT1-SDT	4136	Pavir.J37110.1	30315386	Pavir.J37110.1.p|PACid:30315386	0.3669	1.28957886076276	0.0386	3	AT2G28470.1	beta-galactosidase 8	Functional enzyme
RT1-SDT	2702	Pavir.Aa02378.1	30253859	Pavir.Aa02378.1.p|PACid:30253859	1.6689	3.17972059472067	<.0001	4	AT2G29420.1	glutathione S-transferase tau 7	Functional enzyme
RT1-SDT	6625	Pavir.Ba01974.1	30289794	Pavir.Ba01974.1.p|PACid:30289794	1.8237	3.5398788846588	0.0004	2	AT2G29420.1	glutathione S-transferase tau 7	Functional enzyme
RT1-SDT	6513	Pavir.Ea03180.1	30229990	Pavir.Ea03180.1.p|PACid:30229990	0.8772	1.83680694246335	<.0001	2	AT2G30140.1	UDP-Glycosyltransferase superfamily protein	Functional enzyme
RT1-SDT	5450	Pavir.Fb00468.1	30278875	Pavir.Fb00468.1.p|PACid:30278875	0.1985	1.14750465012532	0.2435	3	AT2G30750.1	cytochrome P450, family 71, subfamily A, polypeptide 12	Functional enzyme
RT1-SDT	691	Pavir.Ib00332.1	30240898	Pavir.Ib00332.1.p|PACid:30240898	0.8515	1.80437599747994	<.0001	12	AT2G30860.1	glutathione S-transferase PHI 9	Functional enzyme
RT1-SDT	6598	Pavir.Ab02462.1	30232733	Pavir.Ab02462.1.p|PACid:30232733	0.6851	1.60781342275808	0.0003	3	AT2G32300.1	uclacyanin 1	Functional enzyme
RT1-SDT	395	Pavir.Eb01515.1	30310895	Pavir.Eb01515.1.p|PACid:30310895	0.63664	1.5547040734097	<.0001	27	AT2G32520.1	alpha/beta-Hydrolases superfamily protein	Functional enzyme
RT1-SDT	560	Pavir.J33952.1	30281345	Pavir.J33952.1.p|PACid:30281345	1.4756	2.7809927815969	<.0001	4	AT2G32520.1	alpha/beta-Hydrolases superfamily protein	Functional enzyme
RT1-SDT	2274	Pavir.Ca02020.1	30206257	Pavir.Ca02020.1.p|PACid:30206257	2.0153	4.04264634322398	<.0001	3	AT2G32810.1	beta galactosidase 9	Functional enzyme
RT1-SDT	2040	Pavir.Cb00980.1	30269537	Pavir.Cb00980.1.p|PACid:30269537	1.7572	3.38041413007363	<.0001	5	AT2G32810.1	beta galactosidase 9	Functional enzyme
RT1-SDT	4349	Pavir.J10676.1	30190373	Pavir.J10676.1.p|PACid:30190373	0.5938	1.50921673215319	0.0017	3	AT2G36760.1	UDP-glucosyl transferase 73C2	Functional enzyme
RT1-SDT	1730	Pavir.Ab00530.1	30233882	Pavir.Ab00530.1.p|PACid:30233882	0.04028	1.02831338359663	0.4442	26	AT2G36780.1	UDP-Glycosyltransferase superfamily protein	Functional enzyme
RT1-SDT	2331	Pavir.J37601.1	30220682	Pavir.J37601.1.p|PACid:30220682	-0.4236	0.745561878391088	0.008	5	AT2G37130.1	Peroxidase superfamily protein	Functional enzyme
RT1-SDT	2744	Pavir.Cb01386.1	30268866	Pavir.Cb01386.1.p|PACid:30268866	-0.2935	0.815920220743539	0.1838	2	AT2G37130.1	Peroxidase superfamily protein	Functional enzyme
RT1-SDT	2966	Pavir.Ib00295.1	30240235	Pavir.Ib00295.1.p|PACid:30240235	0.6826	1.60502970700844	<.0001	7	AT2G39020.1	Acyl-CoA N-acyltransferases (NAT) superfamily protein	Functional enzyme
RT1-SDT	3876	Pavir.Eb01125.1	30310860	Pavir.Eb01125.1.p|PACid:30310860	-0.07599	0.948690890941827	0.3619	7	AT2G39040.1	Peroxidase superfamily protein	Functional enzyme
RT1-SDT	6227	Pavir.J09056.1	30208699	Pavir.J09056.1.p|PACid:30208699	-0.3849	0.765832080142215	0.0252	2	AT2G40760.1	Rhodanese/Cell cycle control phosphatase superfamily protein	Functional enzyme
RT1-SDT	4985	Pavir.Ga01389.1	30304907	Pavir.Ga01389.1.p|PACid:30304907	0.47649	1.39135445404232	<.0001	8	AT2G42490.1	Copper amine oxidase family protein	Functional enzyme
RT1-SDT	2141	Pavir.Gb01319.1	30221868	Pavir.Gb01319.1.p|PACid:30221868	0.07763	1.05528304033818	0.0395	16	AT2G43670.1	Carbohydrate-binding X8 domain superfamily protein	Functional enzyme
RT1-SDT	5462	Pavir.Ib00422.1	30242202	Pavir.Ib00422.1.p|PACid:30242202	-0.9719	0.509834179286759	<.0001	6	AT2G44290.1	Bifunctional inhibitor/lipid-transfer protein/seed storage 2S albumin superfamily protein	Functional enzyme
RT1-SDT	5873	Pavir.J29922.1	30200334	Pavir.J29922.1.p|PACid:30200334	1.344	2.53854177203961	<.0001	3	AT2G44300.1	Bifunctional inhibitor/lipid-transfer protein/seed storage 2S albumin superfamily protein	Functional enzyme
RT1-SDT	474	Pavir.J20251.1	30247636	Pavir.J20251.1.p|PACid:30247636	0.64095	1.55935564113783	<.0001	59	AT2G44450.1	beta glucosidase 15	Functional enzyme
RT1-SDT	4297	Pavir.J03772.1	30225872	Pavir.J03772.1.p|PACid:30225872	0.13973	1.10169891391797	0.0667	7	AT2G44480.1	beta glucosidase 17	Functional enzyme
RT1-SDT	4722	Pavir.J12618.1	30315655	Pavir.J12618.1.p|PACid:30315655	0.68117	1.60343958900443	<.0001	10	AT2G44480.1	beta glucosidase 17	Functional enzyme
RT1-SDT	5668	Pavir.Ia02163.1	30213037	Pavir.Ia02163.1.p|PACid:30213037	-0.3809	0.76795836382372	0.0007	8	AT2G45180.1	Bifunctional inhibitor/lipid-transfer protein/seed storage 2S albumin superfamily protein	Functional enzyme
RT1-SDT	7055	Pavir.Aa02058.1	30253206	Pavir.Aa02058.1.p|PACid:30253206	2.2585	4.78493723264648	0.0014	2	AT2G45550.1	cytochrome P450, family 76, subfamily C, polypeptide 4	Functional enzyme
RT1-SDT	1897	Pavir.Hb00024.1	30264825	Pavir.Hb00024.1.p|PACid:30264825	0.51593	1.42991560474061	<.0001	14	AT2G47140.1	NAD(P)-binding Rossmann-fold superfamily protein	Functional enzyme
RT1-SDT	2895	Pavir.Ia04860.1	30210096	Pavir.Ia04860.1.p|PACid:30210096	1.30317	2.46770510456958	<.0001	11	AT2G47730.1	glutathione S-transferase phi 8	Functional enzyme
RT1-SDT	4366	Pavir.Ib00352.1	30239823	Pavir.Ib00352.1.p|PACid:30239823	1.6418	3.12054929071935	<.0001	5	AT2G47730.1	glutathione S-transferase phi 8	Functional enzyme
RT1-SDT	3013	Pavir.J11418.1	30194734	Pavir.J11418.1.p|PACid:30194734	0.7093	1.63501061252833	0.0169	4	AT2G47730.1	glutathione S-transferase phi 8	Functional enzyme
RT1-SDT	6606	Pavir.Ib00203.1	30238910	Pavir.Ib00203.1.p|PACid:30238910	1.078	2.11110743527593	<.0001	3	AT2G47730.1	glutathione S-transferase phi 8	Functional enzyme
RT1-SDT	4634	Pavir.Bb00105.1	30297002	Pavir.Bb00105.1.p|PACid:30297002	-0.59503	0.662030688513409	<.0001	11	AT3G01190.1	Peroxidase superfamily protein	Functional enzyme
RT1-SDT	4885	Pavir.Cb01015.1	30269436	Pavir.Cb01015.1.p|PACid:30269436	0.2691	1.2050558402058	0.0448	3	AT3G01190.1	Peroxidase superfamily protein	Functional enzyme
RT1-SDT	6629	Pavir.Ia00044.1	30212945	Pavir.Ia00044.1.p|PACid:30212945	-0.05215	0.964497898520901	0.7534	2	AT3G01980.1	NAD(P)-binding Rossmann-fold superfamily protein	Functional enzyme
RT1-SDT	2371	Pavir.Fa02092.1	30186351	Pavir.Fa02092.1.p|PACid:30186351	0.7921	1.73159315177077	<.0001	6	AT3G02100.1	UDP-Glycosyltransferase superfamily protein	Functional enzyme
RT1-SDT	3460	Pavir.Ha00953.1	30318213	Pavir.Ha00953.1.p|PACid:30318213	0.5871	1.50222404956873	0.0394	4	AT3G02100.1	UDP-Glycosyltransferase superfamily protein	Functional enzyme
RT1-SDT	6788	Pavir.Ha01890.1	30316583	Pavir.Ha01890.1.p|PACid:30316583	0.6429	1.56146474897481	0.0004	5	AT3G02100.1	UDP-Glycosyltransferase superfamily protein	Functional enzyme
RT1-SDT	3060	Pavir.J12667.1	30257550	Pavir.J12667.1.p|PACid:30257550	0.4726	1.38760793906396	0.0019	4	AT3G02100.1	UDP-Glycosyltransferase superfamily protein	Functional enzyme
RT1-SDT	4484	Pavir.J12330.1	30194971	Pavir.J12330.1.p|PACid:30194971	0.3588	1.28235881775962	0.0432	4	AT3G02100.1	UDP-Glycosyltransferase superfamily protein	Functional enzyme
RT1-SDT	3558	Pavir.Fb00271.1	30281008	Pavir.Fb00271.1.p|PACid:30281008	1.7768	3.42665275120719	0.0006	2	AT3G02100.1	UDP-Glycosyltransferase superfamily protein	Functional enzyme
RT1-SDT	4978	Pavir.J10282.1	30284744	Pavir.J10282.1.p|PACid:30284744	1.0454	2.06393852454767	<.0001	2	AT3G03080.1	Zinc-binding dehydrogenase family protein	Functional enzyme
RT1-SDT	4011	Pavir.J08895.1	30257540	Pavir.J08895.1.p|PACid:30257540	1.4495	2.73113381061688	<.0001	8	AT3G03080.1	Zinc-binding dehydrogenase family protein	Functional enzyme
RT1-SDT	2235	Pavir.Fa01410.1	30188610	Pavir.Fa01410.1.p|PACid:30188610	0.71517	1.64167665322644	<.0001	6	AT3G03190.1	glutathione S-transferase F11	Functional enzyme
RT1-SDT	3515	Pavir.Fb01392.1	30280437	Pavir.Fb01392.1.p|PACid:30280437	0.6002	1.5159267040086	0.0005	4	AT3G03190.1	glutathione S-transferase F11	Functional enzyme
RT1-SDT	7661	Pavir.Ib00204.1	30237643	Pavir.Ib00204.1.p|PACid:30237643	0.35189	1.27623145733318	0.0049	2	AT3G03190.1	glutathione S-transferase F11	Functional enzyme
RT1-SDT	5696	Pavir.Ib02422.1	30240684	Pavir.Ib02422.1.p|PACid:30240684	0.6975	1.62169217806899	<.0001	3	AT3G03190.1	glutathione S-transferase F11	Functional enzyme
RT1-SDT	704	Pavir.J07933.1	30197560	Pavir.J07933.1.p|PACid:30197560	0.8106	1.75394073441455	<.0001	13	AT3G03190.1	glutathione S-transferase F11	Functional enzyme
RT1-SDT	3772	Pavir.Ha00716.1	30316745	Pavir.Ha00716.1.p|PACid:30316745	0.45887	1.37446483815622	<.0001	4	AT3G03330.1	NAD(P)-binding Rossmann-fold superfamily protein	Functional enzyme
RT1-SDT	7456	Pavir.Bb00378.1	30299926	Pavir.Bb00378.1.p|PACid:30299926	1.7818	3.43854922778878	<.0001	2	AT3G03980.1	NAD(P)-binding Rossmann-fold superfamily protein	Functional enzyme
RT1-SDT	3880	Pavir.J09192.1	30198334	Pavir.J09192.1.p|PACid:30198334	0.204	1.15188764234936	0.0578	9	AT3G07320.1	O-Glycosyl hydrolases family 17 protein	Functional enzyme
RT1-SDT	5868	Pavir.Eb03931.1	30313942	Pavir.Eb03931.1.p|PACid:30313942	0.1525	1.11149387633353	0.2729	2	AT3G09270.1	glutathione S-transferase TAU 8	Functional enzyme
RT1-SDT	6458	Pavir.Bb01461.1	30297924	Pavir.Bb01461.1.p|PACid:30297924	-0.03459	0.976309178996026	0.8716	2	AT3G12270.1	protein arginine methyltransferase 3	Functional enzyme
RT1-SDT	6081	Pavir.Gb00527.1	30222236	Pavir.Gb00527.1.p|PACid:30222236	0.18238	1.13475433524813	0.0522	4	AT3G12800.1	short-chain dehydrogenase-reductase B	Functional enzyme
RT1-SDT	3760	Pavir.Bb02973.1	30297095	Pavir.Bb02973.1.p|PACid:30297095	0.6971	1.62124261185059	<.0001	4	AT3G16520.3	UDP-glucosyl transferase 88A1	Functional enzyme
RT1-SDT	2996	Pavir.Db01991.1	30260923	Pavir.Db01991.1.p|PACid:30260923	0.66785	1.58870361079053	<.0001	11	AT3G16520.3	UDP-glucosyl transferase 88A1	Functional enzyme
RT1-SDT	2733	Pavir.Eb03054.1	30308977	Pavir.Eb03054.1.p|PACid:30308977	0.7384	1.66832458132365	<.0001	9	AT3G16520.3	UDP-glucosyl transferase 88A1	Functional enzyme
RT1-SDT	6449	Pavir.J24255.1	30284379	Pavir.J24255.1.p|PACid:30284379	0.6324	1.55014159285205	0.0038	2	AT3G16520.3	UDP-glucosyl transferase 88A1	Functional enzyme
RT1-SDT	7207	Pavir.Fa01160.1	30186042	Pavir.Fa01160.1.p|PACid:30186042	-0.7875	0.579347154731139	0.0072	2	AT3G16520.3	UDP-glucosyl transferase 88A1	Functional enzyme
RT1-SDT	3002	Pavir.Ib04385.1	30240535	Pavir.Ib04385.1.p|PACid:30240535	0.3167	1.24547839868773	0.0044	6	AT3G18080.1	B-S glucosidase 44	Functional enzyme
RT1-SDT	2194	Pavir.J33584.1	30218880	Pavir.J33584.1.p|PACid:30218880	0.58066	1.49553326444156	<.0001	13	AT3G18080.1	B-S glucosidase 44	Functional enzyme
RT1-SDT	5507	Pavir.Ea00543.1	30227207	Pavir.Ea00543.1.p|PACid:30227207	0.4068	1.32574196069849	0.0323	2	AT3G18270.1	cytochrome P450, family 77, subfamily A, polypeptide 5 pseudogene	Functional enzyme
RT1-SDT	5598	Pavir.Ca01835.1	30203135	Pavir.Ca01835.1.p|PACid:30203135	1.7606	3.38839014830428	<.0001	8	AT3G18280.1	Bifunctional inhibitor/lipid-transfer protein/seed storage 2S albumin superfamily protein	Functional enzyme
RT1-SDT	5223	Pavir.Ab00442.1	30234020	Pavir.Ab00442.1.p|PACid:30234020	-0.1635	0.892856358290927	0.5472	2	AT3G20570.1	early nodulin-like protein 9	Functional enzyme
RT1-SDT	2521	Pavir.Da01661.1	30191709	Pavir.Da01661.1.p|PACid:30191709	0.3904	1.31075677242694	0.0281	3	AT3G21770.1	Peroxidase superfamily protein	Functional enzyme
RT1-SDT	640	Pavir.Ea01477.1	30231124	Pavir.Ea01477.1.p|PACid:30231124	0.7122	1.63830049665189	<.0001	13	AT3G21770.1	Peroxidase superfamily protein	Functional enzyme
RT1-SDT	3588	Pavir.Ia00787.1	30209831	Pavir.Ia00787.1.p|PACid:30209831	1.0902	2.12903549143928	<.0001	6	AT3G22600.1	Bifunctional inhibitor/lipid-transfer protein/seed storage 2S albumin superfamily protein	Functional enzyme
RT1-SDT	4955	Pavir.J00056.1	30294434	Pavir.J00056.1.p|PACid:30294434	0.1002	1.07192205218626	0.6157	4	AT3G22600.1	Bifunctional inhibitor/lipid-transfer protein/seed storage 2S albumin superfamily protein	Functional enzyme
RT1-SDT	5642	Pavir.J04379.1	30216529	Pavir.J04379.1.p|PACid:30216529	0.5973	1.51288255966135	0.0512	3	AT3G22600.1	Bifunctional inhibitor/lipid-transfer protein/seed storage 2S albumin superfamily protein	Functional enzyme
RT1-SDT	1111	Pavir.J04377.1	30247572	Pavir.J04377.1.p|PACid:30247572	0.29998	1.23112734617764	<.0001	31	AT3G23600.1	alpha/beta-Hydrolases superfamily protein	Functional enzyme
RT1-SDT	3050	Pavir.J04985.1	30196616	Pavir.J04985.1.p|PACid:30196616	-0.485	0.714497069870547	0.0002	10	AT3G23600.1	alpha/beta-Hydrolases superfamily protein	Functional enzyme
RT1-SDT	2414	Pavir.J09501.1	30259802	Pavir.J09501.1.p|PACid:30259802	0.5793	1.49412411918723	<.0001	5	AT3G23600.1	alpha/beta-Hydrolases superfamily protein	Functional enzyme
RT1-SDT	4668	Pavir.J24230.1	30217778	Pavir.J24230.1.p|PACid:30217778	0.02265	1.01582367273774	0.8163	7	AT3G23600.1	alpha/beta-Hydrolases superfamily protein	Functional enzyme
RT1-SDT	2919	Pavir.Ia00187.1	30215979	Pavir.Ia00187.1.p|PACid:30215979	0.1688	1.12412307642815	0.1386	4	AT3G24200.2	FAD/NAD(P)-binding oxidoreductase family protein	Functional enzyme
RT1-SDT	2205	Pavir.J18024.1	30198874	Pavir.J18024.1.p|PACid:30198874	0.7805	1.7177260882241	<.0001	8	AT3G24200.2	FAD/NAD(P)-binding oxidoreductase family protein	Functional enzyme
RT1-SDT	1803	Pavir.Ha00813.1	30316783	Pavir.Ha00813.1.p|PACid:30316783	0.14492	1.10566934029346	0.1137	13	AT3G26760.1	NAD(P)-binding Rossmann-fold superfamily protein	Functional enzyme
RT1-SDT	1186	Pavir.Ib03446.1	30240119	Pavir.Ib03446.1.p|PACid:30240119	-0.20982	0.864645103315118	<.0001	32	AT3G28480.1	Oxoglutarate/iron-dependent oxygenase	Functional enzyme
RT1-SDT	6867	Pavir.J03572.1	30195693	Pavir.J03572.1.p|PACid:30195693	-0.8743	0.545518489351479	0.0016	2	AT3G28480.1	Oxoglutarate/iron-dependent oxygenase	Functional enzyme
RT1-SDT	6523	Pavir.Bb00646.1	30297146	Pavir.Bb00646.1.p|PACid:30297146	-1.0927	0.468883039578894	<.0001	2	AT3G28480.1	Oxoglutarate/iron-dependent oxygenase	Functional enzyme
RT1-SDT	2912	Pavir.Ha00314.1	30316917	Pavir.Ha00314.1.p|PACid:30316917	-0.155	0.898132372883934	0.2641	2	AT3G46570.1	Glycosyl hydrolase superfamily protein	Functional enzyme
RT1-SDT	2511	Pavir.Gb00943.1	30223033	Pavir.Gb00943.1.p|PACid:30223033	1.2019	2.30042432791116	<.0001	6	AT3G46660.1	UDP-glucosyl transferase 76E12	Functional enzyme
RT1-SDT	6106	Pavir.Ab00997.1	30233535	Pavir.Ab00997.1.p|PACid:30233535	0.01266	1.00881385862372	0.9361	2	AT3G47810.1	Calcineurin-like metallo-phosphoesterase superfamily protein	Functional enzyme
RT1-SDT	5715	Pavir.Ca02927.1	30203341	Pavir.Ca02927.1.p|PACid:30203341	0.7088	1.63444405921208	<.0001	4	AT3G51000.1	alpha/beta-Hydrolases superfamily protein	Functional enzyme
RT1-SDT	3614	Pavir.Ib01274.1	30237580	Pavir.Ib01274.1.p|PACid:30237580	0.4971	1.41137366898621	0.0001	8	AT3G51000.1	alpha/beta-Hydrolases superfamily protein	Functional enzyme
RT1-SDT	6975	Pavir.J13666.1	30195084	Pavir.J13666.1.p|PACid:30195084	0.7759	1.71225788030731	0.0031	2	AT3G53140.1	O-methyltransferase family protein	Functional enzyme
RT1-SDT	5461	Pavir.J21724.1	30255555	Pavir.J21724.1.p|PACid:30255555	0.3286	1.25579415280051	0.4274	2	AT3G53150.1	UDP-glucosyl transferase 73D1	Functional enzyme
RT1-SDT	5885	Pavir.Db01995.1	30261413	Pavir.Db01995.1.p|PACid:30261413	1.1182	2.1707596540924	<.0001	2	AT3G53150.1	UDP-glucosyl transferase 73D1	Functional enzyme
RT1-SDT	5729	Pavir.J05600.1	30257489	Pavir.J05600.1.p|PACid:30257489	0.99383	1.99146482806331	<.0001	5	AT3G54440.1	glycoside hydrolase family 2 protein	Functional enzyme
RT1-SDT	6517	Pavir.Ea04044.1	30228380	Pavir.Ea04044.1.p|PACid:30228380	1.1015	2.14577677434328	0.0002	2	AT3G54440.2	glycoside hydrolase family 2 protein	Functional enzyme
RT1-SDT	4049	Pavir.Ib01315.1	30241588	Pavir.Ib01315.1.p|PACid:30241588	0.34589	1.27093478167663	<.0001	8	AT3G55040.1	glutathione transferase lambda 2	Functional enzyme
RT1-SDT	6603	Pavir.Hb00769.1	30265414	Pavir.Hb00769.1.p|PACid:30265414	0.616	1.53261996020778	0.0011	2	AT3G55700.1	UDP-Glycosyltransferase superfamily protein	Functional enzyme
RT1-SDT	1314	Pavir.Ib01947.1	30239181	Pavir.Ib01947.1.p|PACid:30239181	0.61602	1.53264120697914	<.0001	18	AT3G56630.1	cytochrome P450, family 94, subfamily D, polypeptide 2	Functional enzyme
RT1-SDT	2098	Pavir.J08726.1	30196357	Pavir.J08726.1.p|PACid:30196357	0.53945	1.45341832364187	<.0001	9	AT3G56630.1	cytochrome P450, family 94, subfamily D, polypeptide 2	Functional enzyme
RT1-SDT	5500	Pavir.J32739.1	30197342	Pavir.J32739.1.p|PACid:30197342	1.5797	2.9890768715786	<.0001	3	AT3G57260.1	beta-1,3-glucanase 2	Functional enzyme
RT1-SDT	849	Pavir.Bb01537.1	30300134	Pavir.Bb01537.1.p|PACid:30300134	0.61479	1.53133507834632	<.0001	15	AT3G60190.1	DYNAMIN-like 1E	Functional enzyme
RT1-SDT	6310	Pavir.J06942.1	30263297	Pavir.J06942.1.p|PACid:30263297	0.6034	1.51929286885141	0.0014	3	AT3G61220.1	NAD(P)-binding Rossmann-fold superfamily protein	Functional enzyme
RT1-SDT	1528	Pavir.Ea02798.1	30227120	Pavir.Ea02798.1.p|PACid:30227120	1.70434	3.25879816288848	<.0001	21	AT3G62760.1	Glutathione S-transferase family protein	Functional enzyme
RT1-SDT	4542	Pavir.Ea03827.1	30229491	Pavir.Ea03827.1.p|PACid:30229491	0.4017	1.321063669627	0.0593	2	AT3G62760.1	Glutathione S-transferase family protein	Functional enzyme
RT1-SDT	3898	Pavir.Eb03845.1	30311172	Pavir.Eb03845.1.p|PACid:30311172	1.00676	2.00939333976322	<.0001	8	AT3G62760.1	Glutathione S-transferase family protein	Functional enzyme
RT1-SDT	3446	Pavir.J12432.1	30201516	Pavir.J12432.1.p|PACid:30201516	0.93	1.90527599608787	<.0001	5	AT3G62760.1	Glutathione S-transferase family protein	Functional enzyme
RT1-SDT	5719	Pavir.Eb03252.1	30308961	Pavir.Eb03252.1.p|PACid:30308961	0.9629	1.94922414717825	<.0001	2	AT3G62760.1	Glutathione S-transferase family protein	Functional enzyme
RT1-SDT	2680	Pavir.Ia00223.1	30210018	Pavir.Ia00223.1.p|PACid:30210018	0.6544	1.57396122492972	<.0001	3	AT4G02340.1	alpha/beta-Hydrolases superfamily protein	Functional enzyme
RT1-SDT	2900	Pavir.J00926.1	30255769	Pavir.J00926.1.p|PACid:30255769	0.5312	1.44513072169488	0.0054	2	AT4G02340.1	alpha/beta-Hydrolases superfamily protein	Functional enzyme
RT1-SDT	6718	Pavir.J37231.1	30276362	Pavir.J37231.1.p|PACid:30276362	0.9591	1.944096725809	<.0001	4	AT4G02340.1	alpha/beta-Hydrolases superfamily protein	Functional enzyme
RT1-SDT	5192	Pavir.Ia03557.1	30212672	Pavir.Ia03557.1.p|PACid:30212672	-0.02088	0.985631316038043	0.9235	4	AT4G02500.1	UDP-xylosyltransferase 2	Functional enzyme
RT1-SDT	2764	Pavir.Bb01166.1	30297790	Pavir.Bb01166.1.p|PACid:30297790	1.13741	2.19985738803063	<.0001	12	AT4G03140.1	NAD(P)-binding Rossmann-fold superfamily protein	Functional enzyme
RT1-SDT	3157	Pavir.Bb03524.1	30297224	Pavir.Bb03524.1.p|PACid:30297224	1.7001	3.24923479741348	<.0001	7	AT4G03140.1	NAD(P)-binding Rossmann-fold superfamily protein	Functional enzyme
RT1-SDT	5200	Pavir.Hb00130.1	30265027	Pavir.Hb00130.1.p|PACid:30265027	-0.1647	0.892114010026817	0.5062	3	AT4G03140.1	NAD(P)-binding Rossmann-fold superfamily protein	Functional enzyme
RT1-SDT	786	Pavir.J28808.1	30307975	Pavir.J28808.1.p|PACid:30307975	0.07008	1.04977489388975	0.2719	36	AT4G03140.1	NAD(P)-binding Rossmann-fold superfamily protein	Functional enzyme
RT1-SDT	3192	Pavir.Cb00986.1	30268037	Pavir.Cb00986.1.p|PACid:30268037	0.26962	1.2054902646425	<.0001	15	AT4G05530.1	indole-3-butyric acid response 1	Functional enzyme
RT1-SDT	2928	Pavir.Ia03144.1	30215847	Pavir.Ia03144.1.p|PACid:30215847	-0.1041	0.930385166082461	0.3167	8	AT4G08670.1	Bifunctional inhibitor/lipid-transfer protein/seed storage 2S albumin superfamily protein	Functional enzyme
RT1-SDT	2281	Pavir.Bb03472.1	30299823	Pavir.Bb03472.1.p|PACid:30299823	0.3156	1.24452913079947	0.0045	7	AT4G11290.1	Peroxidase superfamily protein	Functional enzyme
RT1-SDT	558	Pavir.Ea01469.1	30229084	Pavir.Ea01469.1.p|PACid:30229084	0.5058	1.41991050350636	0.002	5	AT4G11290.1	Peroxidase superfamily protein	Functional enzyme
RT1-SDT	6558	Pavir.Ga00403.1	30305352	Pavir.Ga00403.1.p|PACid:30305352	0.2689	1.2048887955731	0.1704	3	AT4G11290.1	Peroxidase superfamily protein	Functional enzyme
RT1-SDT	337	Pavir.J07067.1	30199017	Pavir.J07067.1.p|PACid:30199017	-0.44033	0.73696601681204	<.0001	68	AT4G11290.1	Peroxidase superfamily protein	Functional enzyme
RT1-SDT	6771	Pavir.Ia03327.1	30213289	Pavir.Ia03327.1.p|PACid:30213289	1.2864	2.43918638047311	<.0001	2	AT4G11290.1	Peroxidase superfamily protein	Functional enzyme
RT1-SDT	4994	Pavir.Bb01436.1	30300992	Pavir.Bb01436.1.p|PACid:30300992	0.5726	1.48720136549342	<.0001	7	AT4G11410.1	NAD(P)-binding Rossmann-fold superfamily protein	Functional enzyme
RT1-SDT	6469	Pavir.Ca01273.1	30205593	Pavir.Ca01273.1.p|PACid:30205593	0.4864	1.40094469139032	0.001	3	AT4G12280.1	copper amine oxidase family protein	Functional enzyme
RT1-SDT	6196	Pavir.Gb01929.1	30224047	Pavir.Gb01929.1.p|PACid:30224047	0.04988	1.03517881650696	0.708	3	AT4G12290.1	Copper amine oxidase family protein	Functional enzyme
RT1-SDT	4004	Pavir.Ca01643.1	30205507	Pavir.Ca01643.1.p|PACid:30205507	-0.08124	0.945244857156779	0.4042	5	AT4G12290.1	Copper amine oxidase family protein	Functional enzyme
RT1-SDT	4367	Pavir.J02109.1	30216489	Pavir.J02109.1.p|PACid:30216489	0.3593	1.28280332648216	0.0036	5	AT4G12320.1	cytochrome P450, family 706, subfamily A, polypeptide 6	Functional enzyme
RT1-SDT	5422	Pavir.Ga02032.1	30304186	Pavir.Ga02032.1.p|PACid:30304186	0.4046	1.32372184588567	0.0027	3	AT4G13010.1	Oxidoreductase, zinc-binding dehydrogenase family protein	Functional enzyme
RT1-SDT	7699	Pavir.J01869.1	30285860	Pavir.J01869.1.p|PACid:30285860	1.3749	2.59349933539639	0.0007	2	AT4G13010.1	Oxidoreductase, zinc-binding dehydrogenase family protein	Functional enzyme
RT1-SDT	3255	Pavir.Aa00214.1	30251610	Pavir.Aa00214.1.p|PACid:30251610	-0.61632	0.652332765758873	<.0001	13	AT4G13180.1	NAD(P)-binding Rossmann-fold superfamily protein	Functional enzyme
RT1-SDT	2309	Pavir.J11168.1	30216990	Pavir.J11168.1.p|PACid:30216990	-0.01054	0.992720850992382	0.9081	8	AT4G13180.1	NAD(P)-binding Rossmann-fold superfamily protein	Functional enzyme
RT1-SDT	2961	Pavir.J30717.1	30273308	Pavir.J30717.1.p|PACid:30273308	-0.7025	0.614506425019874	0.0001	4	AT4G13180.1	NAD(P)-binding Rossmann-fold superfamily protein	Functional enzyme
RT1-SDT	3312	Pavir.J30882.1	30190313	Pavir.J30882.1.p|PACid:30190313	1.4288	2.69222689078684	<.0001	2	AT4G13180.1	NAD(P)-binding Rossmann-fold superfamily protein	Functional enzyme
RT1-SDT	2722	Pavir.Bb00681.1	30300106	Pavir.Bb00681.1.p|PACid:30300106	-0.02701	0.981452260921227	0.7857	5	AT4G14930.1	Survival protein SurE-like phosphatase/nucleotidase	Functional enzyme
RT1-SDT	2058	Pavir.J35104.1	30195475	Pavir.J35104.1.p|PACid:30195475	0.0686	1.04869852629249	0.1716	10	AT4G14930.1	Survival protein SurE-like phosphatase/nucleotidase	Functional enzyme
RT1-SDT	4118	Pavir.Aa03065.1	30252087	Pavir.Aa03065.1.p|PACid:30252087	0.6285	1.54595679425835	<.0001	5	AT4G15480.1	UDP-Glycosyltransferase superfamily protein	Functional enzyme
RT1-SDT	1136	Pavir.Ga00257.1	30305711	Pavir.Ga00257.1.p|PACid:30305711	-0.29603	0.814490626037687	0.0004	13	AT4G16270.1	Peroxidase superfamily protein	Functional enzyme
RT1-SDT	2606	Pavir.J22364.1	30281737	Pavir.J22364.1.p|PACid:30281737	0.87323	1.83175937569427	<.0001	12	AT4G19880.1	Glutathione S-transferase family protein	Functional enzyme
RT1-SDT	2563	Pavir.J00204.1	30200307	Pavir.J00204.1.p|PACid:30200307	0.3807	1.30197342365558	0.01	5	AT4G19880.1	Glutathione S-transferase family protein	Functional enzyme
RT1-SDT	5639	Pavir.Bb03096.1	30297017	Pavir.Bb03096.1.p|PACid:30297017	-0.04944	0.966311341887184	0.8022	3	AT4G19900.1	alpha 1,4-glycosyltransferase family protein	Functional enzyme
RT1-SDT	4633	Pavir.J38051.1	30306613	Pavir.J38051.1.p|PACid:30306613	0.3113	1.2408252932562	0.0867	2	AT4G20860.1	FAD-binding Berberine family protein	Functional enzyme
RT1-SDT	5088	Pavir.Da00938.1	30193188	Pavir.Da00938.1.p|PACid:30193188	-0.7837	0.580875142995274	<.0001	3	AT4G20860.1	FAD-binding Berberine family protein	Functional enzyme
RT1-SDT	5240	Pavir.Da00810.1	30192346	Pavir.Da00810.1.p|PACid:30192346	0.3449	1.27006294543272	0.0351	3	AT4G20860.1	FAD-binding Berberine family protein	Functional enzyme
RT1-SDT	2553	Pavir.J07735.1	30219923	Pavir.J07735.1.p|PACid:30219923	1.17989	2.26559502101781	<.0001	19	AT4G21580.1	oxidoreductase, zinc-binding dehydrogenase family protein	Functional enzyme
RT1-SDT	2142	Pavir.Ca00811.1	30204135	Pavir.Ca00811.1.p|PACid:30204135	1.7434	3.34823316940445	<.0001	8	AT4G25150.1	HAD superfamily, subfamily IIIB acid phosphatase	Functional enzyme
RT1-SDT	2312	Pavir.Ca00812.1	30205054	Pavir.Ca00812.1.p|PACid:30205054	0.01639	1.01142545991401	0.8499	11	AT4G25150.1	HAD superfamily, subfamily IIIB acid phosphatase	Functional enzyme
RT1-SDT	6732	Pavir.Da00791.1	30194688	Pavir.Da00791.1.p|PACid:30194688	-0.0404	0.972385307580248	0.7768	2	AT4G29260.1	HAD superfamily, subfamily IIIB acid phosphatase	Functional enzyme
RT1-SDT	2064	Pavir.J31382.1	30256716	Pavir.J31382.1.p|PACid:30256716	0.3059	1.23618957181959	0.0178	8	AT4G29260.1	HAD superfamily, subfamily IIIB acid phosphatase	Functional enzyme
RT1-SDT	7841	Pavir.J39441.1	30270487	Pavir.J39441.1.p|PACid:30270487	-0.2243	0.856010263707656	0.1536	2	AT4G29270.1	HAD superfamily, subfamily IIIB acid phosphatase	Functional enzyme
RT1-SDT	3177	Pavir.Da00145.1	30192930	Pavir.Da00145.1.p|PACid:30192930	-0.4248	0.744941995292233	0.0202	7	AT4G30170.1	Peroxidase family protein	Functional enzyme
RT1-SDT	5036	Pavir.Gb00184.1	30223967	Pavir.Gb00184.1.p|PACid:30223967	-0.2903	0.817731998288154	0.1381	3	AT4G30210.1	P450 reductase 2	Functional enzyme
RT1-SDT	5130	Pavir.J37041.1	30254894	Pavir.J37041.1.p|PACid:30254894	-1.1705	0.444267342571045	<.0001	5	AT4G30210.2	P450 reductase 2	Functional enzyme
RT1-SDT	3258	Pavir.J38590.1	30221277	Pavir.J38590.1.p|PACid:30221277	-0.501	0.706616821941365	0.0047	5	AT4G30210.2	P450 reductase 2	Functional enzyme
RT1-SDT	3757	Pavir.Ga00049.1	30302932	Pavir.Ga00049.1.p|PACid:30302932	-0.6275	0.647297124459837	0.0955	2	AT4G30210.2	P450 reductase 2	Functional enzyme
RT1-SDT	1911	Pavir.Ca00776.1	30206984	Pavir.Ca00776.1.p|PACid:30206984	1.3269	2.50863051799839	<.0001	3	AT4G33420.1	Peroxidase superfamily protein	Functional enzyme
RT1-SDT	2177	Pavir.Ea00969.1	30230006	Pavir.Ea00969.1.p|PACid:30230006	-0.5287	0.693179070374923	0.0834	2	AT4G33420.1	Peroxidase superfamily protein	Functional enzyme
RT1-SDT	1683	Pavir.Eb01207.1	30312435	Pavir.Eb01207.1.p|PACid:30312435	0.6459	1.56471510192795	<.0001	13	AT4G33420.1	Peroxidase superfamily protein	Functional enzyme
RT1-SDT	1134	Pavir.J01083.1	30286846	Pavir.J01083.1.p|PACid:30286846	0.45881	1.37440767695922	<.0001	32	AT4G33420.1	Peroxidase superfamily protein	Functional enzyme
RT1-SDT	2561	Pavir.Hb01109.1	30266828	Pavir.Hb01109.1.p|PACid:30266828	-0.4658	0.724069456572945	0.0994	2	AT4G33420.1	Peroxidase superfamily protein	Functional enzyme
RT1-SDT	3707	Pavir.Gb01927.1	30223561	Pavir.Gb01927.1.p|PACid:30223561	0.26148	1.19870777784041	0.0033	9	AT4G33650.1	dynamin-related protein 3A	Functional enzyme
RT1-SDT	1474	Pavir.J01701.1	30258251	Pavir.J01701.1.p|PACid:30258251	0.1197	1.08650890585826	0.3766	5	AT4G33650.1	dynamin-related protein 3A	Functional enzyme
RT1-SDT	1358	Pavir.J04431.1	30258926	Pavir.J04431.1.p|PACid:30258926	0.3719	1.2940559542505	0.0081	4	AT4G33650.1	dynamin-related protein 3A	Functional enzyme
RT1-SDT	3968	Pavir.J00046.1	30246397	Pavir.J00046.1.p|PACid:30246397	-0.3031	0.810508937739706	0.18	2	AT4G33910.1	2-oxoglutarate (2OG) and Fe(II)-dependent oxygenase superfamily protein	Functional enzyme
RT1-SDT	3406	Pavir.Ia00367.1	30215564	Pavir.Ia00367.1.p|PACid:30215564	-0.5373	0.68905927574079	0.0081	3	AT4G33910.1	2-oxoglutarate (2OG) and Fe(II)-dependent oxygenase superfamily protein	Functional enzyme
RT1-SDT	1923	Pavir.Ga02230.1	30302474	Pavir.Ga02230.1.p|PACid:30302474	0.29847	1.22983945808283	<.0001	24	AT4G34880.1	Amidase family protein	Functional enzyme
RT1-SDT	4481	Pavir.Ib02878.1	30240563	Pavir.Ib02878.1.p|PACid:30240563	0.1005	1.07214497528771	0.3474	7	AT4G34880.1	Amidase family protein	Functional enzyme
RT1-SDT	1253	Pavir.Ha01223.1	30317247	Pavir.Ha01223.1.p|PACid:30317247	0.93675	1.91421118012804	<.0001	31	AT4G35150.1	O-methyltransferase family protein	Functional enzyme
RT1-SDT	3597	Pavir.Ha01276.1	30316445	Pavir.Ha01276.1.p|PACid:30316445	1.8783	3.67641594363995	<.0001	5	AT4G35150.1	O-methyltransferase family protein	Functional enzyme
RT1-SDT	2036	Pavir.J09453.1	30276238	Pavir.J09453.1.p|PACid:30276238	1.20772	2.30972325171884	<.0001	13	AT4G35150.1	O-methyltransferase family protein	Functional enzyme
RT1-SDT	5505	Pavir.J27072.1	30284478	Pavir.J27072.1.p|PACid:30284478	0.02189	1.01528868602425	0.9277	2	AT4G37360.1	cytochrome P450, family 81, subfamily D, polypeptide 2	Functional enzyme
RT1-SDT	4459	Pavir.Fa00161.1	30187801	Pavir.Fa00161.1.p|PACid:30187801	0.05409	1.0382040350609	0.6559	4	AT4G37530.1	Peroxidase superfamily protein	Functional enzyme
RT1-SDT	3808	Pavir.Fb00708.1	30279511	Pavir.Fb00708.1.p|PACid:30279511	-0.1389	0.908211367954701	0.3231	4	AT4G37530.1	Peroxidase superfamily protein	Functional enzyme
RT1-SDT	2151	Pavir.J35205.1	30294654	Pavir.J35205.1.p|PACid:30294654	-0.58247	0.667819442085871	<.0001	15	AT4G37530.1	Peroxidase superfamily protein	Functional enzyme
RT1-SDT	5247	Pavir.Eb00747.1	30310677	Pavir.Eb00747.1.p|PACid:30310677	0.1439	1.10488789715254	0.3693	5	AT5G02540.1	NAD(P)-binding Rossmann-fold superfamily protein	Functional enzyme
RT1-SDT	3845	Pavir.Ib00604.1	30242407	Pavir.Ib00604.1.p|PACid:30242407	-0.8465	0.556132286126056	<.0001	8	AT5G03455.1	Rhodanese/Cell cycle control phosphatase superfamily protein	Functional enzyme
RT1-SDT	3821	Pavir.Ib02411.1	30238745	Pavir.Ib02411.1.p|PACid:30238745	-0.4733	0.720315073535691	0.0013	6	AT5G03455.1	Rhodanese/Cell cycle control phosphatase superfamily protein	Functional enzyme
RT1-SDT	5236	Pavir.Ia01025.1	30215579	Pavir.Ia01025.1.p|PACid:30215579	-0.5287	0.693179070374923	0.0208	3	AT5G03455.1	Rhodanese/Cell cycle control phosphatase superfamily protein	Functional enzyme
RT1-SDT	2407	Pavir.Aa02521.1	30248963	Pavir.Aa02521.1.p|PACid:30248963	0.2742	1.20932331202226	0.1105	4	AT5G05340.1	Peroxidase superfamily protein	Functional enzyme
RT1-SDT	597	Pavir.Aa02779.1	30253897	Pavir.Aa02779.1.p|PACid:30253897	-0.08202	0.944733944113031	0.2194	18	AT5G05340.1	Peroxidase superfamily protein	Functional enzyme
RT1-SDT	384	Pavir.Ab01211.1	30235576	Pavir.Ab01211.1.p|PACid:30235576	-0.06569	0.955488225456394	0.1318	38	AT5G05340.1	Peroxidase superfamily protein	Functional enzyme
RT1-SDT	191	Pavir.Ba00168.1	30290826	Pavir.Ba00168.1.p|PACid:30290826	0.54859	1.46265548906703	<.0001	113	AT5G05340.1	Peroxidase superfamily protein	Functional enzyme
RT1-SDT	6350	Pavir.Ba02551.1	30289380	Pavir.Ba02551.1.p|PACid:30289380	0.3388	1.26470420496997	0.0889	2	AT5G05340.1	Peroxidase superfamily protein	Functional enzyme
RT1-SDT	2512	Pavir.Bb01189.1	30299268	Pavir.Bb01189.1.p|PACid:30299268	0.01937	1.01351679786543	0.9184	2	AT5G05340.1	Peroxidase superfamily protein	Functional enzyme
RT1-SDT	1836	Pavir.Bb03601.1	30301014	Pavir.Bb03601.1.p|PACid:30301014	1.06403	2.09076367616672	<.0001	13	AT5G05340.1	Peroxidase superfamily protein	Functional enzyme
RT1-SDT	1266	Pavir.Bb03604.1	30299956	Pavir.Bb03604.1.p|PACid:30299956	0.56815	1.48262115299021	<.0001	26	AT5G05340.1	Peroxidase superfamily protein	Functional enzyme
RT1-SDT	2567	Pavir.Ca00782.1	30206195	Pavir.Ca00782.1.p|PACid:30206195	-0.27	0.829319545814442	0.0471	4	AT5G05340.1	Peroxidase superfamily protein	Functional enzyme
RT1-SDT	3132	Pavir.J00306.1	30248223	Pavir.J00306.1.p|PACid:30248223	-0.4011	0.757280665423444	0.1237	2	AT5G05340.1	Peroxidase superfamily protein	Functional enzyme
RT1-SDT	4665	Pavir.J07831.1	30220476	Pavir.J07831.1.p|PACid:30220476	-0.2475	0.842354840966793	0.5359	2	AT5G05340.1	Peroxidase superfamily protein	Functional enzyme
RT1-SDT	1955	Pavir.Bb03603.1	30297743	Pavir.Bb03603.1.p|PACid:30297743	0.06624	1.04698443892307	0.7382	4	AT5G05340.1	Peroxidase superfamily protein	Functional enzyme
RT1-SDT	6142	Pavir.Aa02780.1	30252859	Pavir.Aa02780.1.p|PACid:30252859	0.3293	1.25640361576865	0.0097	2	AT5G05340.1	Peroxidase superfamily protein	Functional enzyme
RT1-SDT	4259	Pavir.Ab01132.1	30234105	Pavir.Ab01132.1.p|PACid:30234105	0.3813	1.30251501179252	0.0874	3	AT5G05340.1	Peroxidase superfamily protein	Functional enzyme
RT1-SDT	4738	Pavir.Ea03391.1	30231527	Pavir.Ea03391.1.p|PACid:30231527	2.1069	4.30764691109272	<.0001	4	AT5G05960.1	Bifunctional inhibitor/lipid-transfer protein/seed storage 2S albumin superfamily protein	Functional enzyme
RT1-SDT	3498	Pavir.Gb01868.1	30222408	Pavir.Gb01868.1.p|PACid:30222408	1.8785	3.67692563843766	<.0001	9	AT5G05960.1	Bifunctional inhibitor/lipid-transfer protein/seed storage 2S albumin superfamily protein	Functional enzyme
RT1-SDT	3593	Pavir.J00683.1	30255035	Pavir.J00683.1.p|PACid:30255035	2.3497	5.09718246976904	<.0001	9	AT5G05960.1	Bifunctional inhibitor/lipid-transfer protein/seed storage 2S albumin superfamily protein	Functional enzyme
RT1-SDT	5251	Pavir.J08343.1	30273449	Pavir.J08343.1.p|PACid:30273449	1.5551	2.93854094363463	<.0001	5	AT5G05960.1	Bifunctional inhibitor/lipid-transfer protein/seed storage 2S albumin superfamily protein	Functional enzyme
RT1-SDT	3612	Pavir.Ib01154.1	30242098	Pavir.Ib01154.1.p|PACid:30242098	0.4816	1.39629134463074	<.0001	7	AT5G06060.1	NAD(P)-binding Rossmann-fold superfamily protein	Functional enzyme
RT1-SDT	6101	Pavir.Bb00337.1	30299960	Pavir.Bb00337.1.p|PACid:30299960	0.7736	1.70953030762483	<.0001	4	AT5G06580.1	FAD-linked oxidases family protein	Functional enzyme
RT1-SDT	6124	Pavir.J40166.1	30190986	Pavir.J40166.1.p|PACid:30190986	0.7567	1.68962138540238	<.0001	3	AT5G06580.1	FAD-linked oxidases family protein	Functional enzyme
RT1-SDT	5131	Pavir.Ia02811.1	30212405	Pavir.Ia02811.1.p|PACid:30212405	2.1502	4.43889320688199	<.0001	2	AT5G06720.1	peroxidase 2	Functional enzyme
RT1-SDT	5446	Pavir.J21069.1	30255640	Pavir.J21069.1.p|PACid:30255640	-0.1856	0.879283316219185	0.3258	3	AT5G06900.1	cytochrome P450, family 93, subfamily D, polypeptide 1	Functional enzyme
RT1-SDT	2873	Pavir.Hb00674.1	30266110	Pavir.Hb00674.1.p|PACid:30266110	0.3196	1.24798448615816	0.0796	2	AT5G07360.1	Amidase family protein	Functional enzyme
RT1-SDT	5211	Pavir.Ab01801.1	30234363	Pavir.Ab01801.1.p|PACid:30234363	0.5685	1.48298088275915	0.0279	2	AT5G07720.1	Galactosyl transferase GMA12/MNN10 family protein	Functional enzyme
RT1-SDT	2311	Pavir.Ib01707.1	30243079	Pavir.Ib01707.1.p|PACid:30243079	1.1554	2.22746073410113	<.0001	15	AT5G13690.1	alpha-N-acetylglucosaminidase family / NAGLU family	Functional enzyme
RT1-SDT	3929	Pavir.Ha01431.1	30317838	Pavir.Ha01431.1.p|PACid:30317838	0.2125	1.15869430946228	0.1633	6	AT5G13980.1	Glycosyl hydrolase family 38 protein	Functional enzyme
RT1-SDT	3310	Pavir.Hb00955.1	30266761	Pavir.Hb00955.1.p|PACid:30266761	1.3718	2.58793252047095	<.0001	9	AT5G13980.1	Glycosyl hydrolase family 38 protein	Functional enzyme
RT1-SDT	5279	Pavir.Hb00965.1	30266548	Pavir.Hb00965.1.p|PACid:30266548	0.06337	1.0449037091656	0.5898	2	AT5G13980.1	Glycosyl hydrolase family 38 protein	Functional enzyme
RT1-SDT	5889	Pavir.Ea02215.1	30226932	Pavir.Ea02215.1.p|PACid:30226932	-0.5429	0.686389790893436	<.0001	4	AT5G14660.1	peptide deformylase 1B	Functional enzyme
RT1-SDT	7842	Pavir.Ia00951.1	30213634	Pavir.Ia00951.1.p|PACid:30213634	-0.1961	0.872907083728363	0.4641	2	AT5G15070.1	Phosphoglycerate mutase-like family protein	Functional enzyme
RT1-SDT	1616	Pavir.Ia01391.1	30209780	Pavir.Ia01391.1.p|PACid:30209780	0.67654	1.59830196454135	<.0001	5	AT5G15180.1	Peroxidase superfamily protein	Functional enzyme
RT1-SDT	1447	Pavir.Ib03777.1	30240399	Pavir.Ib03777.1.p|PACid:30240399	0.5326	1.44653376594549	<.0001	6	AT5G15180.1	Peroxidase superfamily protein	Functional enzyme
RT1-SDT	1846	Pavir.Ca00381.1	30203810	Pavir.Ca00381.1.p|PACid:30203810	1.7491	3.3614880014512	<.0001	13	AT5G16970.1	alkenal reductase	Functional enzyme
RT1-SDT	3990	Pavir.Eb00989.1	30310165	Pavir.Eb00989.1.p|PACid:30310165	0.73032	1.65900703035626	<.0001	8	AT5G16970.1	alkenal reductase	Functional enzyme
RT1-SDT	7560	Pavir.Da00542.1	30193445	Pavir.Da00542.1.p|PACid:30193445	-0.1419	0.906324757735202	0.4034	3	AT5G16990.1	Zinc-binding dehydrogenase family protein	Functional enzyme
RT1-SDT	6280	Pavir.J00143.1	30185155	Pavir.J00143.1.p|PACid:30185155	-0.2425	0.845279285130392	0.1023	4	AT5G18900.1	2-oxoglutarate (2OG) and Fe(II)-dependent oxygenase superfamily protein	Functional enzyme
RT1-SDT	5730	Pavir.Bb03714.1	30298379	Pavir.Bb03714.1.p|PACid:30298379	0.30516	1.23555565703601	0.0008	4	AT5G19370.1	rhodanese-like domain-containing protein / PPIC-type PPIASE domain-containing protein	Functional enzyme
RT1-SDT	3376	Pavir.Ea01789.1	30230240	Pavir.Ea01789.1.p|PACid:30230240	0.8124	1.75613043046885	<.0001	11	AT5G19440.1	NAD(P)-binding Rossmann-fold superfamily protein	Functional enzyme
RT1-SDT	7298	Pavir.Ia03248.1	30215713	Pavir.Ia03248.1.p|PACid:30215713	0.5084	1.42247174883071	0.0046	2	AT5G20870.1	O-Glycosyl hydrolases family 17 protein	Functional enzyme
RT1-SDT	2988	Pavir.Hb00046.1	30264784	Pavir.Hb00046.1.p|PACid:30264784	-0.04327	0.970452832779294	0.7055	4	AT5G24318.1	O-Glycosyl hydrolases family 17 protein	Functional enzyme
RT1-SDT	5604	Pavir.Aa01249.1	30252100	Pavir.Aa01249.1.p|PACid:30252100	0.82513	1.77169467688427	<.0001	5	AT5G24760.1	GroES-like zinc-binding dehydrogenase family protein	Functional enzyme
RT1-SDT	4697	Pavir.J14918.1	30273607	Pavir.J14918.1.p|PACid:30273607	0.4475	1.3636751391832	0.1981	2	AT5G25120.1	ytochrome p450, family 71, subfamily B, polypeptide 11	Functional enzyme
RT1-SDT	7312	Pavir.Ba03190.1	30292712	Pavir.Ba03190.1.p|PACid:30292712	0.7998	1.74085977545443	0.0002	2	AT5G25120.1	ytochrome p450, family 71, subfamily B, polypeptide 11	Functional enzyme
RT1-SDT	3892	Pavir.Ab02129.1	30232069	Pavir.Ab02129.1.p|PACid:30232069	0.3976	1.31731466391875	0.2221	2	AT5G25180.1	cytochrome P450, family 71, subfamily B, polypeptide 14	Functional enzyme
RT1-SDT	6223	Pavir.J01018.1	30247653	Pavir.J01018.1.p|PACid:30247653	0.6771	1.59892248572529	0.0062	2	AT5G26330.1	Cupredoxin superfamily protein	Functional enzyme
RT1-SDT	6362	Pavir.Ia03731.1	30209098	Pavir.Ia03731.1.p|PACid:30209098	0.5297	1.4436289701034	0.027	4	AT5G27410.2	D-aminoacid aminotransferase-like PLP-dependent enzymes superfamily protein	Functional enzyme
RT1-SDT	1414	Pavir.Db00674.1	30262984	Pavir.Db00674.1.p|PACid:30262984	1.09857	2.14142329300326	<.0001	2	AT5G34850.1	purple acid phosphatase 26	Functional enzyme
RT1-SDT	3537	Pavir.J07533.1	30220156	Pavir.J07533.1.p|PACid:30220156	0.25183	1.19071653299073	0.01	9	AT5G36110.1	cytochrome P450, family 716, subfamily A, polypeptide 1	Functional enzyme
RT1-SDT	1220	Pavir.Ga00910.1	30305132	Pavir.Ga00910.1.p|PACid:30305132	1.4683	2.76695657064711	<.0001	9	AT5G38010.1	UDP-Glycosyltransferase superfamily protein	Functional enzyme
RT1-SDT	2631	Pavir.J32096.1	30283111	Pavir.J32096.1.p|PACid:30283111	-0.07352	0.950316510703239	0.5536	3	AT5G39580.1	Peroxidase superfamily protein	Functional enzyme
RT1-SDT	5273	Pavir.Da00544.1	30192016	Pavir.Da00544.1.p|PACid:30192016	0.6786	1.60058578317728	0.0005	3	AT5G39990.1	Core-2/I-branching beta-1,6-N-acetylglucosaminyltransferase family protein	Functional enzyme
RT1-SDT	3932	Pavir.Ia03296.1	30210796	Pavir.Ia03296.1.p|PACid:30210796	-1.9987	0.250225374359874	<.0001	2	AT5G42180.1	Peroxidase superfamily protein	Functional enzyme
RT1-SDT	2368	Pavir.J24201.1	30188906	Pavir.J24201.1.p|PACid:30188906	-0.5036	0.705344516158988	0.1273	3	AT5G42180.1	Peroxidase superfamily protein	Functional enzyme
RT1-SDT	2361	Pavir.Eb02206.1	30310315	Pavir.Eb02206.1.p|PACid:30310315	0.6126	1.52901228688557	0.0166	3	AT5G42180.1	Peroxidase superfamily protein	Functional enzyme
RT1-SDT	5733	Pavir.Ea03057.1	30226941	Pavir.Ea03057.1.p|PACid:30226941	0.2712	1.20681120768219	0.0696	4	AT5G43710.1	Glycosyl hydrolase family 47 protein	Functional enzyme
RT1-SDT	1927	Pavir.J25352.1	30199901	Pavir.J25352.1.p|PACid:30199901	0.81905	1.76424387336815	<.0001	12	AT5G43940.1	GroES-like zinc-binding dehydrogenase family protein	Functional enzyme
RT1-SDT	4659	Pavir.Ab03277.1	30235654	Pavir.Ab03277.1.p|PACid:30235654	0.8779	1.83769838299807	<.0001	3	AT5G43940.2	GroES-like zinc-binding dehydrogenase family protein	Functional enzyme
RT1-SDT	5243	Pavir.J23818.1	30195250	Pavir.J23818.1.p|PACid:30195250	0.8215	1.76724247641051	0.0002	2	AT5G43940.2	GroES-like zinc-binding dehydrogenase family protein	Functional enzyme
RT1-SDT	1816	Pavir.J16725.1	30287593	Pavir.J16725.1.p|PACid:30287593	1.332	2.51751434700972	<.0001	17	AT5G44410.1	FAD-binding Berberine family protein	Functional enzyme
RT1-SDT	2217	Pavir.Aa02744.1	30253163	Pavir.Aa02744.1.p|PACid:30253163	-0.06767	0.954177782848713	0.5563	10	AT5G45910.1	GDSL-like Lipase/Acylhydrolase superfamily protein	Functional enzyme
RT1-SDT	4119	Pavir.Da02115.1	30192483	Pavir.Da02115.1.p|PACid:30192483	0.04302	1.03026823607154	0.656	8	AT5G45910.1	GDSL-like Lipase/Acylhydrolase superfamily protein	Functional enzyme
RT1-SDT	1783	Pavir.Da02196.1	30192909	Pavir.Da02196.1.p|PACid:30192909	1.09934	2.14256652562989	<.0001	5	AT5G45910.1	GDSL-like Lipase/Acylhydrolase superfamily protein	Functional enzyme
RT1-SDT	1728	Pavir.Db02147.2	30259856	Pavir.Db02147.2.p|PACid:30259856	1.15251	2.22300316129739	<.0001	6	AT5G45910.1	GDSL-like Lipase/Acylhydrolase superfamily protein	Functional enzyme
RT1-SDT	2590	Pavir.Ea00066.1	30230938	Pavir.Ea00066.1.p|PACid:30230938	0.3228	1.25075567653997	0.0087	4	AT5G45910.1	GDSL-like Lipase/Acylhydrolase superfamily protein	Functional enzyme
RT1-SDT	1805	Pavir.Eb00209.1	30311479	Pavir.Eb00209.1.p|PACid:30311479	0.10919	1.07862247472503	0.2583	9	AT5G45910.1	GDSL-like Lipase/Acylhydrolase superfamily protein	Functional enzyme
RT1-SDT	2693	Pavir.J35250.1	30208528	Pavir.J35250.1.p|PACid:30208528	-0.01922	0.98676606010743	0.8617	9	AT5G45910.1	GDSL-like Lipase/Acylhydrolase superfamily protein	Functional enzyme
RT1-SDT	6174	Pavir.Bb01305.1	30300071	Pavir.Bb01305.1.p|PACid:30300071	0.6288	1.54627830036281	0.0046	3	AT5G45910.1	GDSL-like Lipase/Acylhydrolase superfamily protein	Functional enzyme
RT1-SDT	5739	Pavir.Ca00506.1	30206464	Pavir.Ca00506.1.p|PACid:30206464	0.6742	1.59571167689545	0.0003	3	AT5G45910.1	GDSL-like Lipase/Acylhydrolase superfamily protein	Functional enzyme
RT1-SDT	4967	Pavir.J12292.1	30283978	Pavir.J12292.1.p|PACid:30283978	0.24138	1.18212287228333	0.0015	9	AT5G45920.1	SGNH hydrolase-type esterase superfamily protein	Functional enzyme
RT1-SDT	6319	Pavir.J33323.1	30200038	Pavir.J33323.1.p|PACid:30200038	0.02639	1.01846048032908	0.9012	2	AT5G45920.1	SGNH hydrolase-type esterase superfamily protein	Functional enzyme
RT1-SDT	6035	Pavir.J18194.1	30255395	Pavir.J18194.1.p|PACid:30255395	1.378	2.59907812491088	<.0001	3	AT5G46940.1	Plant invertase/pectin methylesterase inhibitor superfamily protein	Functional enzyme
RT1-SDT	6274	Pavir.Ga01426.1	30305266	Pavir.Ga01426.1.p|PACid:30305266	0.3228	1.25075567653997	0.0097	3	AT5G47000.1	Peroxidase superfamily protein	Functional enzyme
RT1-SDT	6561	Pavir.Ba02325.1	30292743	Pavir.Ba02325.1.p|PACid:30292743	0.9972	1.99612214010482	0.0003	2	AT5G48485.1	Bifunctional inhibitor/lipid-transfer protein/seed storage 2S albumin superfamily protein	Functional enzyme
RT1-SDT	4266	Pavir.J08421.1	30272543	Pavir.J08421.1.p|PACid:30272543	0.88786	1.85042928058538	<.0001	12	AT5G50400.1	purple acid phosphatase 27	Functional enzyme
RT1-SDT	6552	Pavir.J07693.1	30274721	Pavir.J07693.1.p|PACid:30274721	-0.02586	0.982234907308678	0.8557	3	AT5G54830.1	DOMON domain-containing protein / dopamine beta-monooxygenase N-terminal domain-containing protein	Functional enzyme
RT1-SDT	2215	Pavir.Db00017.1	30260295	Pavir.Db00017.1.p|PACid:30260295	-0.2024	0.869103560008966	0.0551	10	AT5G55050.1	GDSL-like Lipase/Acylhydrolase superfamily protein	Functional enzyme
RT1-SDT	1852	Pavir.Bb02933.1	30300552	Pavir.Bb02933.1.p|PACid:30300552	1.22772	2.34196578677177	<.0001	25	AT5G55180.1	O-Glycosyl hydrolases family 17 protein	Functional enzyme
RT1-SDT	6644	Pavir.Ea03802.1	30226792	Pavir.Ea03802.1.p|PACid:30226792	-0.78597	0.579961887095734	<.0001	4	AT5G55410.2	Bifunctional inhibitor/lipid-transfer protein/seed storage 2S albumin superfamily protein	Functional enzyme
RT1-SDT	1828	Pavir.Eb00061.1	30309691	Pavir.Eb00061.1.p|PACid:30309691	1.08969	2.12828299962836	<.0001	21	AT5G57850.1	D-aminoacid aminotransferase-like PLP-dependent enzymes superfamily protein	Functional enzyme
RT1-SDT	2931	Pavir.Fa01764.1	30187362	Pavir.Fa01764.1.p|PACid:30187362	1.397	2.63353384411849	<.0001	8	AT5G58090.1	O-Glycosyl hydrolases family 17 protein	Functional enzyme
RT1-SDT	3910	Pavir.Ab00357.1	30235135	Pavir.Ab00357.1.p|PACid:30235135	0.4595	1.37506517427411	0.0108	3	AT5G58090.1	O-Glycosyl hydrolases family 17 protein	Functional enzyme
RT1-SDT	3918	Pavir.J33678.1	30248832	Pavir.J33678.1.p|PACid:30248832	0.03811	1.02676782987043	0.491	9	AT5G58240.1	FRAGILE HISTIDINE TRIAD	Functional enzyme
RT1-SDT	3352	Pavir.Ib01762.1	30238565	Pavir.Ib01762.1.p|PACid:30238565	-1.3266	0.398706767935721	<.0001	9	AT5G58390.1	Peroxidase superfamily protein	Functional enzyme
RT1-SDT	3316	Pavir.Ib00122.1	30242142	Pavir.Ib00122.1.p|PACid:30242142	1.1558	2.22807840297532	<.0001	5	AT5G61510.1	GroES-like zinc-binding alcohol dehydrogenase family protein	Functional enzyme
RT1-SDT	6657	Pavir.J31831.1	30315766	Pavir.J31831.1.p|PACid:30315766	0.02988	1.02092720383789	0.8089	3	AT5G62930.1	SGNH hydrolase-type esterase superfamily protein	Functional enzyme
RT1-SDT	7147	Pavir.Ib04081.1	30241861	Pavir.Ib04081.1.p|PACid:30241861	-0.07739	0.947770722099952	0.5923	3	AT5G62930.1	SGNH hydrolase-type esterase superfamily protein	Functional enzyme
RT1-SDT	4359	Pavir.J11992.1	30314503	Pavir.J11992.1.p|PACid:30314503	0.58447	1.49948802416353	<.0001	4	AT5G63140.1	purple acid phosphatase 29	Functional enzyme
RT1-SDT	1433	Pavir.Ia04697.1	30212234	Pavir.Ia04697.1.p|PACid:30212234	0.4656	1.38089153063422	0.0004	4	AT5G63840.1	Glycosyl hydrolases family 31 protein	Functional enzyme
RT1-SDT	1586	Pavir.Ib00768.1	30240625	Pavir.Ib00768.1.p|PACid:30240625	0.5099	1.42395149138013	0.0076	3	AT5G63840.1	Glycosyl hydrolases family 31 protein	Functional enzyme
RT1-SDT	2552	Pavir.Fa00614.1	30185952	Pavir.Fa00614.1.p|PACid:30185952	0.835	1.78385703884019	0.0007	2	AT5G64250.2	Aldolase-type TIM barrel family protein	Functional enzyme
RT1-SDT	3912	Pavir.Fb01814.1	30280643	Pavir.Fb01814.1.p|PACid:30280643	0.3966	1.31640188735435	0.0135	2	AT5G64250.2	Aldolase-type TIM barrel family protein	Functional enzyme
RT1-SDT	3110	Pavir.Ia02573.1	30209033	Pavir.Ia02573.1.p|PACid:30209033	0.80217	1.74372193847944	<.0001	7	AT5G66150.1	Glycosyl hydrolase family 38 protein	Functional enzyme
RT1-SDT	780	Pavir.Ea01172.1	30226588	Pavir.Ea01172.1.p|PACid:30226588	0.47068	1.38576247960544	<.0001	23	AT5G66390.1	Peroxidase superfamily protein	Functional enzyme
RT1-SDT	1785	Pavir.Ea01634.1	30228385	Pavir.Ea01634.1.p|PACid:30228385	0.4644	1.37974341490299	0.0004	5	AT5G66390.1	Peroxidase superfamily protein	Functional enzyme
RT1-SDT	1212	Pavir.Ea01234.1	30227409	Pavir.Ea01234.1.p|PACid:30227409	0.5897	1.50493377269112	<.0001	4	AT5G66390.1	Peroxidase superfamily protein	Functional enzyme
RT1-SDT	3437	Pavir.Gb01690.1	30223664	Pavir.Gb01690.1.p|PACid:30223664	-0.3501	0.784529716555949	0.066	3	AT5G66390.1	Peroxidase superfamily protein	Functional enzyme
RT1-SDT	7651	Pavir.J13439.1	30294821	Pavir.J13439.1.p|PACid:30294821	0.7995	1.74049781147635	0.0001	2	AT5G66920.1	SKU5 similar 17	Functional enzyme
RT1-SDT	4140	Pavir.Ba01536.1	30291351	Pavir.Ba01536.1.p|PACid:30291351	-1.2963	0.407169104296348	<.0001	3	AT5G67400.1	root hair specific 19	Functional enzyme
RT1-SDT	3478	Pavir.J09376.1	30245447	Pavir.J09376.1.p|PACid:30245447	0.9775	1.96905034667483	<.0001	7	AT3G23640.1	heteroglycan glucosidase 1	Functional enzyme
RT1-SDT	6524	Pavir.J39186.1	30197892	Pavir.J39186.1.p|PACid:30197892	0.5768	1.49153724139182	0.0042	2	AT3G23640.1	heteroglycan glucosidase 1	Functional enzyme
RT1-SDT	6107	Pavir.Cb01183.1	30270361	Pavir.Cb01183.1.p|PACid:30270361	0.07173	1.05097620075992	0.6054	3	AT4G31500.1	cytochrome P450, family 83, subfamily B, polypeptide 1	Functional enzyme
RT1-SDT	2855	Pavir.Aa01260.2	30249834	Pavir.Aa01260.2.p|PACid:30249834	0.8322	1.78039826500536	<.0001	9	AT5G22300.1	nitrilase 4	Functional enzyme
RT1-SDT	5218	Pavir.Ia03586.1	30213644	Pavir.Ia03586.1.p|PACid:30213644	0.3478	1.27261850066158	0.1131	2	AT1G07110.1	fructose-2,6-bisphosphatase	Glycolysis
RT1-SDT	222	Pavir.Da01209.1	30192995	Pavir.Da01209.1.p|PACid:30192995	0.12481	1.09036412447347	0.0005	38	AT1G12000.1	Phosphofructokinase family protein	Glycolysis
RT1-SDT	271	Pavir.J04679.1	30198660	Pavir.J04679.1.p|PACid:30198660	-0.05575	0.962094158433914	0.1984	29	AT1G12000.1	Phosphofructokinase family protein	Glycolysis
RT1-SDT	24	Pavir.Eb03107.1	30310560	Pavir.Eb03107.1.p|PACid:30310560	0.2032	1.15124907727626	0.2819	2	AT1G13440.1	glyceraldehyde-3-phosphate dehydrogenase C2	Glycolysis
RT1-SDT	195	Pavir.J06962.1	30198037	Pavir.J06962.1.p|PACid:30198037	0.55229	1.46641149487324	<.0001	95	AT1G23190.1	Phosphoglucomutase/phosphomannomutase family protein	Glycolysis
RT1-SDT	769	Pavir.J07440.1	30216069	Pavir.J07440.1.p|PACid:30216069	0.71398	1.64032308252943	<.0001	6	AT1G23190.1	Phosphoglucomutase/phosphomannomutase family protein	Glycolysis
RT1-SDT	947	Pavir.J34423.1	30282385	Pavir.J34423.1.p|PACid:30282385	0.75536	1.68805276455484	<.0001	29	AT1G53310.1	phosphoenolpyruvate carboxylase 1	Glycolysis
RT1-SDT	985	Pavir.Ba02207.1	30291102	Pavir.Ba02207.1.p|PACid:30291102	0.005662	1.00393231066096	0.8755	32	AT1G74030.1	enolase 1	Glycolysis
RT1-SDT	932	Pavir.J37851.1	30254990	Pavir.J37851.1.p|PACid:30254990	0.12817	1.09290651417541	0.0008	42	AT1G74030.1	enolase 1	Glycolysis
RT1-SDT	729	Pavir.Aa00632.1	30250637	Pavir.Aa00632.1.p|PACid:30250637	0.22332	1.16741701448295	0.0001	17	AT1G76550.1	Phosphofructokinase family protein	Glycolysis
RT1-SDT	1009	Pavir.Ab03085.1	30236392	Pavir.Ab03085.1.p|PACid:30236392	0.06663	1.04726750576336	0.6701	5	AT1G76550.1	Phosphofructokinase family protein	Glycolysis
RT1-SDT	5463	Pavir.Da00362.1	30192808	Pavir.Da00362.1.p|PACid:30192808	0.8273	1.77436154005421	0.0012	2	AT1G76550.1	Phosphofructokinase family protein	Glycolysis
RT1-SDT	1582	Pavir.Fa01397.1	30187576	Pavir.Fa01397.1.p|PACid:30187576	0.42992	1.34715887244453	<.0001	7	AT1G76550.1	Phosphofructokinase family protein	Glycolysis
RT1-SDT	156	Pavir.Ab00480.1	30232603	Pavir.Ab00480.1.p|PACid:30232603	-0.04876	0.966766910510503	0.6594	4	AT1G79530.1	glyceraldehyde-3-phosphate dehydrogenase of plastid 1	Glycolysis
RT1-SDT	154	Pavir.J25477.1	30236705	Pavir.J25477.1.p|PACid:30236705	0.08519	1.0608274409834	0.3485	5	AT1G79530.1	glyceraldehyde-3-phosphate dehydrogenase of plastid 1	Glycolysis
RT1-SDT	38	Pavir.Aa03388.1	30249322	Pavir.Aa03388.1.p|PACid:30249322	0.15363	1.11236480196465	<.0001	75	AT1G79550.1	phosphoglycerate kinase	Glycolysis
RT1-SDT	36	Pavir.Ab00469.1	30233099	Pavir.Ab00469.1.p|PACid:30233099	-0.03923	0.973174214608999	0.2313	59	AT1G79550.1	phosphoglycerate kinase	Glycolysis
RT1-SDT	61	Pavir.J07576.1	30308383	Pavir.J07576.1.p|PACid:30308383	1.11478	2.16561982535024	<.0001	33	AT1G79550.1	phosphoglycerate kinase	Glycolysis
RT1-SDT	58	Pavir.J13866.1	30286882	Pavir.J13866.1.p|PACid:30286882	1.24721	2.37381910543029	<.0001	61	AT1G79550.1	phosphoglycerate kinase	Glycolysis
RT1-SDT	4356	Pavir.Ba01841.1	30293900	Pavir.Ba01841.1.p|PACid:30293900	0.70297	1.62785251954739	<.0001	4	AT2G22480.1	phosphofructokinase 5	Glycolysis
RT1-SDT	6712	Pavir.J00860.1	30272221	Pavir.J00860.1.p|PACid:30272221	0.7909	1.73015345191488	<.0001	4	AT2G22480.1	phosphofructokinase 5	Glycolysis
RT1-SDT	1946	Pavir.Fb01628.1	30280656	Pavir.Fb01628.1.p|PACid:30280656	0.88704	1.84937783115775	<.0001	12	AT2G24270.4	aldehyde dehydrogenase 11A3	Glycolysis
RT1-SDT	2068	Pavir.Fa00830.2	30187405	Pavir.Fa00830.2.p|PACid:30187405	0.69314	1.61679862511598	<.0001	8	AT2G24270.4	aldehyde dehydrogenase 11A3	Glycolysis
RT1-SDT	1658	Pavir.Ib01135.1	30240387	Pavir.Ib01135.1.p|PACid:30240387	-0.1958	0.873088618527452	0.3049	3	AT2G29560.1	cytosolic enolase	Glycolysis
RT1-SDT	89	Pavir.Ab01424.1	30234285	Pavir.Ab01424.1.p|PACid:30234285	0.1031	1.07407891851737	0.4648	4	AT2G36460.1	Aldolase superfamily protein	Glycolysis
RT1-SDT	52	Pavir.Ea03521.1	30227656	Pavir.Ea03521.1.p|PACid:30227656	0.56918	1.48368003584768	<.0001	15	AT2G36460.1	Aldolase superfamily protein	Glycolysis
RT1-SDT	72	Pavir.J06306.1	30275689	Pavir.J06306.1.p|PACid:30275689	0.25006	1.18925657376471	0.0001	28	AT2G36460.1	Aldolase superfamily protein	Glycolysis
RT1-SDT	90	Pavir.Aa02208.1	30249388	Pavir.Aa02208.1.p|PACid:30249388	-0.04708	0.96789335400167	0.6676	3	AT2G36460.1	Aldolase superfamily protein	Glycolysis
RT1-SDT	7	Pavir.Cb01141.1	30267585	Pavir.Cb01141.1.p|PACid:30267585	0.1942	1.14408956670218	<.0001	430	AT2G36530.1	Enolase	Glycolysis
RT1-SDT	3	Pavir.Da02275.1	30192478	Pavir.Da02275.1.p|PACid:30192478	-0.01852	0.987244958158132	0.1884	370	AT2G36530.1	Enolase	Glycolysis
RT1-SDT	26	Pavir.Db02274.1	30261237	Pavir.Db02274.1.p|PACid:30261237	-0.01963	0.986485670565219	0.3819	131	AT2G36530.1	Enolase	Glycolysis
RT1-SDT	4	Pavir.Ca01865.1	30204968	Pavir.Ca01865.1.p|PACid:30204968	-0.27344	0.827344450148173	<.0001	87	AT3G04120.1	glyceraldehyde-3-phosphate dehydrogenase C subunit 1	Glycolysis
RT1-SDT	698	Pavir.Fa02320.1	30187689	Pavir.Fa02320.1.p|PACid:30187689	0.5136	1.42760810779416	0.0083	3	AT3G04120.1	glyceraldehyde-3-phosphate dehydrogenase C subunit 1	Glycolysis
RT1-SDT	1	Pavir.J02390.1	30246794	Pavir.J02390.1.p|PACid:30246794	-0.2581	0.836188437739466	0.1023	2	AT3G04120.1	glyceraldehyde-3-phosphate dehydrogenase C subunit 1	Glycolysis
RT1-SDT	79	Pavir.Ea02008.1	30227917	Pavir.Ea02008.1.p|PACid:30227917	0.03837	1.02695288886429	0.8461	2	AT3G08590.1	Phosphoglycerate mutase, 2,3-bisphosphoglycerate-independent	Glycolysis
RT1-SDT	508	Pavir.Ib01540.1	30237822	Pavir.Ib01540.1.p|PACid:30237822	1.7112	3.27433061350802	<.0001	21	AT3G08590.1	Phosphoglycerate mutase, 2,3-bisphosphoglycerate-independent	Glycolysis
RT1-SDT	1037	Pavir.Ab00954.1	30235445	Pavir.Ab00954.1.p|PACid:30235445	0.6515	1.57080054100417	<.0001	44	AT3G14940.1	phosphoenolpyruvate carboxylase 3	Glycolysis
RT1-SDT	2743	Pavir.Ba03664.1	30291286	Pavir.Ba03664.1.p|PACid:30291286	0.4344	1.35134870601788	<.0001	8	AT3G22960.1	Pyruvate kinase family protein	Glycolysis
RT1-SDT	2649	Pavir.J05513.1	30246963	Pavir.J05513.1.p|PACid:30246963	0.63735	1.55546938522144	<.0001	5	AT3G22960.1	Pyruvate kinase family protein	Glycolysis
RT1-SDT	3325	Pavir.J19596.1	30258317	Pavir.J19596.1.p|PACid:30258317	0.2605	1.19789379103771	0.0364	4	AT3G30841.1	Cofactor-independent phosphoglycerate mutase	Glycolysis
RT1-SDT	3166	Pavir.J41009.1	30243452	Pavir.J41009.1.p|PACid:30243452	0.3205	1.24876326228098	0.0788	3	AT3G30841.1	Cofactor-independent phosphoglycerate mutase	Glycolysis
RT1-SDT	4109	Pavir.Ha01905.1	30316450	Pavir.Ha01905.1.p|PACid:30316450	-0.862	0.550189304683069	0.0049	3	AT3G50520.1	Phosphoglycerate mutase family protein	Glycolysis
RT1-SDT	6812	Pavir.J12596.1	30284315	Pavir.J12596.1.p|PACid:30284315	0.185	1.13681697323601	0.2482	2	AT3G50520.1	Phosphoglycerate mutase family protein	Glycolysis
RT1-SDT	311	Pavir.Cb02102.1	30269699	Pavir.Cb02102.1.p|PACid:30269699	0.75653	1.68942230056127	<.0001	51	AT3G52990.1	Pyruvate kinase family protein	Glycolysis
RT1-SDT	1425	Pavir.Ha01275.1	30317191	Pavir.Ha01275.1.p|PACid:30317191	0.41601	1.3342324178401	<.0001	25	AT3G52990.1	Pyruvate kinase family protein	Glycolysis
RT1-SDT	6259	Pavir.Hb01185.1	30266620	Pavir.Hb01185.1.p|PACid:30266620	0.503	1.41715739650822	0.0013	2	AT3G52990.1	Pyruvate kinase family protein	Glycolysis
RT1-SDT	125	Pavir.Ea00503.1	30230338	Pavir.Ea00503.1.p|PACid:30230338	-0.08222	0.944602985256669	0.0466	28	AT3G55440.1	triosephosphate isomerase	Glycolysis
RT1-SDT	106	Pavir.Eb00736.1	30314106	Pavir.Eb00736.1.p|PACid:30314106	0.37444	1.29633626795449	<.0001	47	AT3G55440.1	triosephosphate isomerase	Glycolysis
RT1-SDT	302	Pavir.Eb03677.1	30313434	Pavir.Eb03677.1.p|PACid:30313434	-0.42265	0.746052984975929	<.0001	19	AT3G55440.1	triosephosphate isomerase	Glycolysis
RT1-SDT	189	Pavir.J29421.1	30284469	Pavir.J29421.1.p|PACid:30284469	0.04298	1.03023967136661	0.4595	14	AT3G55440.1	triosephosphate isomerase	Glycolysis
RT1-SDT	1633	Pavir.Ba01978.1	30293088	Pavir.Ba01978.1.p|PACid:30293088	0.48979	1.40424045834472	<.0001	11	AT4G24620.1	phosphoglucose isomerase 1	Glycolysis
RT1-SDT	1792	Pavir.Bb02373.1	30298251	Pavir.Bb02373.1.p|PACid:30298251	0.07761	1.0552684111103	0.3482	9	AT4G24620.1	phosphoglucose isomerase 1	Glycolysis
RT1-SDT	941	Pavir.Ea02935.1	30230708	Pavir.Ea02935.1.p|PACid:30230708	0.25873	1.19642503164489	<.0001	19	AT4G26270.1	phosphofructokinase 3	Glycolysis
RT1-SDT	180	Pavir.J00472.1	30245549	Pavir.J00472.1.p|PACid:30245549	0.63866	1.55688242833869	<.0001	11	AT4G26270.1	phosphofructokinase 3	Glycolysis
RT1-SDT	2650	Pavir.Ca01491.1	30206621	Pavir.Ca01491.1.p|PACid:30206621	0.2477	1.18731274565684	0.2367	3	AT4G26270.1	phosphofructokinase 3	Glycolysis
RT1-SDT	1461	Pavir.Ea00258.1	30229327	Pavir.Ea00258.1.p|PACid:30229327	0.6303	1.54788683409726	<.0001	3	AT4G26270.1	phosphofructokinase 3	Glycolysis
RT1-SDT	2690	Pavir.J39880.1	30308507	Pavir.J39880.1.p|PACid:30308507	0.64124	1.55966912290386	<.0001	2	AT4G26270.1	phosphofructokinase 3	Glycolysis
RT1-SDT	168	Pavir.Ga00571.1	30305906	Pavir.Ga00571.1.p|PACid:30305906	0.39299	1.31311202359364	<.0001	23	AT5G08570.1	Pyruvate kinase family protein	Glycolysis
RT1-SDT	199	Pavir.Gb00269.1	30222106	Pavir.Gb00269.1.p|PACid:30222106	0.38712	1.30778012210546	<.0001	7	AT5G08570.1	Pyruvate kinase family protein	Glycolysis
RT1-SDT	220	Pavir.Ab00183.1	30232747	Pavir.Ab00183.1.p|PACid:30232747	0.34605	1.27107574067061	<.0001	21	AT5G17310.2	UDP-glucose pyrophosphorylase 2	Glycolysis
RT1-SDT	82	Pavir.Ba01388.2	30288499	Pavir.Ba01388.2.p|PACid:30288499	0.84581	1.79727354036853	<.0001	39	AT5G17310.2	UDP-glucose pyrophosphorylase 2	Glycolysis
RT1-SDT	115	Pavir.Bb02554.1	30298616	Pavir.Bb02554.1.p|PACid:30298616	0.71159	1.63760793722032	<.0001	33	AT5G17310.2	UDP-glucose pyrophosphorylase 2	Glycolysis
RT1-SDT	370	Pavir.J06411.1	30199136	Pavir.J06411.1.p|PACid:30199136	0.96419	1.95096784463045	<.0001	31	AT5G17310.2	UDP-glucose pyrophosphorylase 2	Glycolysis
RT1-SDT	2242	Pavir.Ba02479.1	30290016	Pavir.Ba02479.1.p|PACid:30290016	0.54008	1.45405314491184	<.0001	10	AT5G17530.3	phosphoglucosamine mutase family protein	Glycolysis
RT1-SDT	608	Pavir.J01649.1	30199271	Pavir.J01649.1.p|PACid:30199271	0.82893	1.77636739970996	<.0001	30	AT5G42740.1	Sugar isomerase (SIS) family protein	Glycolysis
RT1-SDT	3840	Pavir.J15479.1	30208673	Pavir.J15479.1.p|PACid:30208673	2.288	4.88378605067654	<.0001	8	AT5G47810.1	phosphofructokinase 2	Glycolysis
RT1-SDT	1068	Pavir.Eb01145.1	30313952	Pavir.Eb01145.1.p|PACid:30313952	0.27909	1.21342925554367	<.0001	24	AT5G56350.1	Pyruvate kinase family protein	Glycolysis
RT1-SDT	2448	Pavir.Ib01518.1	30239638	Pavir.Ib01518.1.p|PACid:30239638	0.5066	1.42069808742053	0.0015	4	AT5G56350.1	Pyruvate kinase family protein	Glycolysis
RT1-SDT	1575	Pavir.Eb02668.1	30312654	Pavir.Eb02668.1.p|PACid:30312654	0.26891	1.20489714725476	0.0016	8	AT5G52920.1	plastidic pyruvate kinase beta subunit 1	Glycolysis
RT1-SDT	1128	Pavir.Ia03489.1	30214513	Pavir.Ia03489.1.p|PACid:30214513	0.17854	1.13173799251676	0.0006	25	AT5G52920.1	plastidic pyruvate kinase beta subunit 1	Glycolysis
RT1-SDT	1543	Pavir.J04686.1	30272442	Pavir.J04686.1.p|PACid:30272442	0.03047	1.02134480438198	0.7056	10	AT5G52920.1	plastidic pyruvate kinase beta subunit 1	Glycolysis
RT1-SDT	866	Pavir.Aa02862.1	30253817	Pavir.Aa02862.1.p|PACid:30253817	0.8388	1.78856183905882	0.0009	3	AT2G42790.1	citrate synthase 3	Glyoxylate cycle
RT1-SDT	800	Pavir.Ab00851.1	30235813	Pavir.Ab00851.1.p|PACid:30235813	0.8246	1.77104393248278	<.0001	6	AT2G42790.1	citrate synthase 3	Glyoxylate cycle
RT1-SDT	41	Pavir.J02207.1	30225449	Pavir.J02207.1.p|PACid:30225449	-1.73864	0.299652019069238	<.0001	51	AT4G15530.1	pyruvate orthophosphate dikinase	Glyoxylate cycle
RT1-SDT	43	Pavir.J15849.1	30199049	Pavir.J15849.1.p|PACid:30199049	-1.03	0.489710148793463	<.0001	46	AT4G15530.5	pyruvate orthophosphate dikinase	Glyoxylate cycle
RT1-SDT	4488	Pavir.Ib01078.1	30241868	Pavir.Ib01078.1.p|PACid:30241868	0.5063	1.42040269227232	<.0001	7	AT4G37870.1	phosphoenolpyruvate carboxykinase 1	Glyoxylate cycle
RT1-SDT	1849	Pavir.J39033.1	30273295	Pavir.J39033.1.p|PACid:30273295	0.342	1.26751252203442	0.2014	2	AT5G09660.1	peroxisomal NAD-malate dehydrogenase 2	Glyoxylate cycle
RT1-SDT	1290	Pavir.J01067.1	30270719	Pavir.J01067.1.p|PACid:30270719	-0.10655	0.928806516957159	0.1661	12	AT5G09660.4	peroxisomal NAD-malate dehydrogenase 2	Glyoxylate cycle
RT1-SDT	3081	Pavir.Ib01429.1	30239337	Pavir.Ib01429.1.p|PACid:30239337	0.33814	1.26412576403023	<.0001	8	AT3G16910.1	acyl-activating enzyme 7	Glyoxylate cycle
RT1-SDT	4250	Pavir.J13203.1	30273134	Pavir.J13203.1.p|PACid:30273134	0.7079	1.63342475791947	<.0001	4	AT3G16910.1	acyl-activating enzyme 7	Glyoxylate cycle
RT1-SDT	4040	Pavir.Da01825.1	30194256	Pavir.Da01825.1.p|PACid:30194256	0.33448	1.26092284425584	0.0002	7	AT1G01710.1	Acyl-CoA thioesterase family protein	Lipids metabolism
RT1-SDT	2505	Pavir.J05199.1	30259059	Pavir.J05199.1.p|PACid:30259059	0.72646	1.65457420997666	<.0001	25	AT1G04290.1	Thioesterase superfamily protein	Lipids metabolism
RT1-SDT	6390	Pavir.Da00984.1	30194329	Pavir.Da00984.1.p|PACid:30194329	0.7569	1.6898556328987	0.0014	2	AT1G06290.1	acyl-CoA oxidase 3	Lipids metabolism
RT1-SDT	5547	Pavir.Ab00188.1	30234455	Pavir.Ab00188.1.p|PACid:30234455	0.67147	1.59269497990509	<.0001	4	AT1G20560.1	acyl activating enzyme 1	Lipids metabolism
RT1-SDT	2922	Pavir.Aa02062.1	30249351	Pavir.Aa02062.1.p|PACid:30249351	0.10699	1.07697891111822	0.2664	4	AT1G24360.1	NAD(P)-binding Rossmann-fold superfamily protein	Lipids metabolism
RT1-SDT	1711	Pavir.Ab01435.1	30234265	Pavir.Ab01435.1.p|PACid:30234265	0.37827	1.29978229361109	<.0001	11	AT1G24360.1	NAD(P)-binding Rossmann-fold superfamily protein	Lipids metabolism
RT1-SDT	3979	Pavir.Ga02379.1	30304480	Pavir.Ga02379.1.p|PACid:30304480	0.22122	1.16571894783792	0.0332	5	AT1G24360.1	NAD(P)-binding Rossmann-fold superfamily protein	Lipids metabolism
RT1-SDT	2025	Pavir.Gb02009.1	30222314	Pavir.Gb02009.1.p|PACid:30222314	0.51895	1.43291198856729	<.0001	22	AT1G24360.1	NAD(P)-binding Rossmann-fold superfamily protein	Lipids metabolism
RT1-SDT	5009	Pavir.J20509.1	30272019	Pavir.J20509.1.p|PACid:30272019	0.4345	1.35144237761881	<.0001	5	AT1G27480.1	alpha/beta-Hydrolases superfamily protein	Lipids metabolism
RT1-SDT	2681	Pavir.Da02371.1	30192897	Pavir.Da02371.1.p|PACid:30192897	0.47781	1.39262806231055	<.0001	12	AT1G31812.1	acyl-CoA-binding protein 6	Lipids metabolism
RT1-SDT	3944	Pavir.Fa02106.2	30188726	Pavir.Fa02106.2.p|PACid:30188726	-0.4039	0.755812351262525	0.0025	4	AT1G31812.1	acyl-CoA-binding protein 6	Lipids metabolism
RT1-SDT	3387	Pavir.Fb00434.1	30279270	Pavir.Fb00434.1.p|PACid:30279270	-0.17655	0.88481638088423	0.0646	6	AT1G31812.1	acyl-CoA-binding protein 6	Lipids metabolism
RT1-SDT	3606	Pavir.Db02396.1	30260752	Pavir.Db02396.1.p|PACid:30260752	0.44549	1.3617765546372	<.0001	7	AT1G31812.1	acyl-CoA-binding protein 6	Lipids metabolism
RT1-SDT	1118	Pavir.Ga02221.1	30304966	Pavir.Ga02221.1.p|PACid:30304966	0.1257	1.09103697870296	0.4108	5	AT1G36160.1	acetyl-CoA carboxylase 1	Lipids metabolism
RT1-SDT	2884	Pavir.Ia02736.1	30214587	Pavir.Ia02736.1.p|PACid:30214587	0.5501	1.46418718215005	0.0005	5	AT1G36160.1	acetyl-CoA carboxylase 1	Lipids metabolism
RT1-SDT	602	Pavir.J00726.1	30274184	Pavir.J00726.1.p|PACid:30274184	0.132	1.09581176644769	0.2306	9	AT1G36180.1	acetyl-CoA carboxylase 2	Lipids metabolism
RT1-SDT	1614	Pavir.J40164.1	30216151	Pavir.J40164.1.p|PACid:30216151	-0.04414	0.969867789217718	0.8054	2	AT1G36180.1	acetyl-CoA carboxylase 2	Lipids metabolism
RT1-SDT	7208	Pavir.Ea03717.1	30228265	Pavir.Ea03717.1.p|PACid:30228265	0.2993	1.23054720324543	0.1352	2	AT1G43620.1	UDP-Glycosyltransferase superfamily protein	Lipids metabolism
RT1-SDT	4753	Pavir.J03540.1	30191198	Pavir.J03540.1.p|PACid:30191198	-0.5882	0.665172301687267	0.0004	7	AT1G43800.1	Plant stearoyl-acyl-carrier-protein desaturase family protein	Lipids metabolism
RT1-SDT	5014	Pavir.Aa01512.1	30252328	Pavir.Aa01512.1.p|PACid:30252328	2.2825	4.86520299144665	<.0001	2	AT1G47480.1	alpha/beta-Hydrolases superfamily protein	Lipids metabolism
RT1-SDT	4991	Pavir.Ab02053.1	30235451	Pavir.Ab02053.1.p|PACid:30235451	2.1724	4.50772654792404	<.0001	4	AT1G47480.1	alpha/beta-Hydrolases superfamily protein	Lipids metabolism
RT1-SDT	3425	Pavir.Bb02348.1	30297870	Pavir.Bb02348.1.p|PACid:30297870	0.269	1.20497231499479	0.0761	4	AT1G47480.1	alpha/beta-Hydrolases superfamily protein	Lipids metabolism
RT1-SDT	1580	Pavir.Db01882.1	30262056	Pavir.Db01882.1.p|PACid:30262056	0.43672	1.35352356006782	<.0001	6	AT1G47480.1	alpha/beta-Hydrolases superfamily protein	Lipids metabolism
RT1-SDT	4619	Pavir.Fb01763.1	30278940	Pavir.Fb01763.1.p|PACid:30278940	0.24983	1.18906699301351	0.0155	6	AT1G47480.1	alpha/beta-Hydrolases superfamily protein	Lipids metabolism
RT1-SDT	5183	Pavir.Eb02839.1	30313002	Pavir.Eb02839.1.p|PACid:30313002	-0.04832	0.967061804650969	0.7896	4	AT1G48600.2	S-adenosyl-L-methionine-dependent methyltransferases superfamily protein	Lipids metabolism
RT1-SDT	3230	Pavir.Bb02686.1	30297191	Pavir.Bb02686.1.p|PACid:30297191	-2.0291	0.245007870595408	<.0001	5	AT1G54580.1	acyl carrier protein 2	Lipids metabolism
RT1-SDT	2963	Pavir.Fb02310.1	30278297	Pavir.Fb02310.1.p|PACid:30278297	-1.6479	0.319104310065966	<.0001	9	AT1G54580.1	acyl carrier protein 2	Lipids metabolism
RT1-SDT	3371	Pavir.J01373.1	30219389	Pavir.J01373.1.p|PACid:30219389	-1.7776	0.291668198833396	<.0001	4	AT1G54580.1	acyl carrier protein 2	Lipids metabolism
RT1-SDT	2629	Pavir.J04109.1	30256957	Pavir.J04109.1.p|PACid:30256957	-1.3435	0.394063491360282	<.0001	8	AT1G54580.1	acyl carrier protein 2	Lipids metabolism
RT1-SDT	1415	Pavir.Ga00329.1	30303877	Pavir.Ga00329.1.p|PACid:30303877	0.02016	1.01407193773065	0.7483	18	AT1G62640.1	3-ketoacyl-acyl carrier protein synthase III	Lipids metabolism
RT1-SDT	5943	Pavir.J40604.1	30197730	Pavir.J40604.1.p|PACid:30197730	0.698	1.62225431115409	0.0005	2	AT1G64400.1	AMP-dependent synthetase and ligase family protein	Lipids metabolism
RT1-SDT	4952	Pavir.J01656.1	30207618	Pavir.J01656.1.p|PACid:30207618	-0.6467	0.638739687973003	<.0001	7	AT1G65290.1	mitochondrial acyl carrier protein 2	Lipids metabolism
RT1-SDT	5380	Pavir.Ib01656.1	30240125	Pavir.Ib01656.1.p|PACid:30240125	-0.6586	0.633492743998542	0.0004	4	AT1G65290.1	mitochondrial acyl carrier protein 2	Lipids metabolism
RT1-SDT	6489	Pavir.Ib01891.1	30242335	Pavir.Ib01891.1.p|PACid:30242335	0.2624	1.19947243206594	0.067	2	AT1G74960.1	fatty acid biosynthesis 1	Lipids metabolism
RT1-SDT	5612	Pavir.Bb03332.1	30298846	Pavir.Bb03332.1.p|PACid:30298846	-0.06072	0.958785502687636	0.5911	4	AT1G74960.1	fatty acid biosynthesis 1	Lipids metabolism
RT1-SDT	6426	Pavir.Bb02722.2	30300449	Pavir.Bb02722.2.p|PACid:30300449	0.6203	1.53719479872778	0.0005	2	AT1G76150.1	enoyl-CoA hydratase 2	Lipids metabolism
RT1-SDT	4645	Pavir.Eb02878.1	30310281	Pavir.Eb02878.1.p|PACid:30310281	0.5789	1.49370991744219	0.0012	4	AT1G77420.1	alpha/beta-Hydrolases superfamily protein	Lipids metabolism
RT1-SDT	3025	Pavir.J22970.1	30248854	Pavir.J22970.1.p|PACid:30248854	0.1374	1.09992106991701	0.5278	2	AT1G77590.1	long chain acyl-CoA synthetase 9	Lipids metabolism
RT1-SDT	2791	Pavir.J31789.1	30202275	Pavir.J31789.1.p|PACid:30202275	0.152	1.11110872865509	0.4252	3	AT1G77590.1	long chain acyl-CoA synthetase 9	Lipids metabolism
RT1-SDT	2782	Pavir.Hb01702.1	30265878	Pavir.Hb01702.1.p|PACid:30265878	0.5038	1.41794345335235	<.0001	5	AT1G77590.1	long chain acyl-CoA synthetase 9	Lipids metabolism
RT1-SDT	3071	Pavir.Ba02562.1	30289684	Pavir.Ba02562.1.p|PACid:30289684	0.6471	1.56601713678749	<.0001	5	AT2G04350.1	AMP-dependent synthetase and ligase family protein	Lipids metabolism
RT1-SDT	2131	Pavir.Bb01660.1	30301378	Pavir.Bb01660.1.p|PACid:30301378	0.95479	1.93829747299485	<.0001	9	AT2G04350.1	AMP-dependent synthetase and ligase family protein	Lipids metabolism
RT1-SDT	3695	Pavir.Ba02764.1	30288829	Pavir.Ba02764.1.p|PACid:30288829	0.88187	1.84276231520047	<.0001	3	AT2G04350.1	AMP-dependent synthetase and ligase family protein	Lipids metabolism
RT1-SDT	1221	Pavir.Bb01823.1	30296597	Pavir.Bb01823.1.p|PACid:30296597	0.62455	1.54172985983387	<.0001	10	AT2G05990.1	NAD(P)-binding Rossmann-fold superfamily protein	Lipids metabolism
RT1-SDT	453	Pavir.Fa01133.1	30188258	Pavir.Fa01133.1.p|PACid:30188258	0.52945	1.44337882993942	<.0001	15	AT2G05990.1	NAD(P)-binding Rossmann-fold superfamily protein	Lipids metabolism
RT1-SDT	422	Pavir.Fb01277.1	30280941	Pavir.Fb01277.1.p|PACid:30280941	0.45632	1.3720375825163	<.0001	15	AT2G05990.1	NAD(P)-binding Rossmann-fold superfamily protein	Lipids metabolism
RT1-SDT	7353	Pavir.Ga00370.1	30302951	Pavir.Ga00370.1.p|PACid:30302951	0.1641	1.1204668763482	0.4421	2	AT2G20900.2	diacylglycerol kinase 5	Lipids metabolism
RT1-SDT	5647	Pavir.Fb00498.1	30279805	Pavir.Fb00498.1.p|PACid:30279805	0.3991	1.31868501560467	0.009	3	AT2G20900.2	diacylglycerol kinase 5	Lipids metabolism
RT1-SDT	3350	Pavir.Fa01769.1	30187385	Pavir.Fa01769.1.p|PACid:30187385	0.09402	1.0673401344135	0.5	8	AT2G22230.1	Thioesterase superfamily protein	Lipids metabolism
RT1-SDT	5883	Pavir.Ba01112.1	30288592	Pavir.Ba01112.1.p|PACid:30288592	0.4237	1.34136326722942	0.0353	2	AT2G26260.1	3beta-hydroxysteroid-dehydrogenase/decarboxylase isoform 2	Lipids metabolism
RT1-SDT	4850	Pavir.Ib01899.1	30243002	Pavir.Ib01899.1.p|PACid:30243002	0.4477	1.36386419780303	0.0132	2	AT2G26260.1	3beta-hydroxysteroid-dehydrogenase/decarboxylase isoform 2	Lipids metabolism
RT1-SDT	5777	Pavir.Ba01862.1	30290107	Pavir.Ba01862.1.p|PACid:30290107	0.2044	1.15220705769633	0.1847	3	AT2G26830.1	Protein kinase superfamily protein	Lipids metabolism
RT1-SDT	5382	Pavir.Eb03895.1	30313191	Pavir.Eb03895.1.p|PACid:30313191	0.05874	1.04155570472902	0.7959	2	AT2G26870.1	non-specific phospholipase C2	Lipids metabolism
RT1-SDT	4028	Pavir.Ha00329.1	30318323	Pavir.Ha00329.1.p|PACid:30318323	0.21743	1.16266059069179	0.0061	4	AT2G29590.1	Thioesterase superfamily protein	Lipids metabolism
RT1-SDT	1673	Pavir.Ia04047.1	30210712	Pavir.Ia04047.1.p|PACid:30210712	-0.03448	0.976383621689001	0.5619	10	AT2G30200.1	catalytics;transferases;[acyl-carrier-protein] S-malonyltransferases;binding	Lipids metabolism
RT1-SDT	2207	Pavir.Ib01380.1	30239436	Pavir.Ib01380.1.p|PACid:30239436	0.15164	1.11083150496704	0.0107	9	AT2G30200.1	catalytics;transferases;[acyl-carrier-protein] S-malonyltransferases;binding	Lipids metabolism
RT1-SDT	3575	Pavir.Aa03374.1	30251195	Pavir.Aa03374.1.p|PACid:30251195	-0.39619	0.759862349286254	<.0001	10	AT2G32260.1	phosphorylcholine cytidylyltransferase	Lipids metabolism
RT1-SDT	4362	Pavir.Ab03081.1	30235722	Pavir.Ab03081.1.p|PACid:30235722	0.65586	1.57555487188163	<.0001	3	AT2G33630.1	NAD(P)-binding Rossmann-fold superfamily protein	Lipids metabolism
RT1-SDT	1441	Pavir.Eb01598.1	30312574	Pavir.Eb01598.1.p|PACid:30312574	0.7609	1.69454740874552	0.0006	2	AT2G38010.1	Neutral/alkaline non-lysosomal ceramidase	Lipids metabolism
RT1-SDT	2384	Pavir.Ga01988.1	30305756	Pavir.Ga01988.1.p|PACid:30305756	0.23438	1.17640106873864	<.0001	24	AT2G43710.1	Plant stearoyl-acyl-carrier-protein desaturase family protein	Lipids metabolism
RT1-SDT	6086	Pavir.J03506.1	30198034	Pavir.J03506.1.p|PACid:30198034	0.4043	1.32344661428347	0.0042	3	AT2G43710.2	Plant stearoyl-acyl-carrier-protein desaturase family protein	Lipids metabolism
RT1-SDT	1790	Pavir.Ia00211.1	30208948	Pavir.Ia00211.1.p|PACid:30208948	-0.4484	0.732855159828686	0.0818	2	AT3G05420.1	acyl-CoA binding protein 4	Lipids metabolism
RT1-SDT	1531	Pavir.J06398.1	30263864	Pavir.J06398.1.p|PACid:30263864	0.16693	1.12266694861197	0.0363	7	AT3G05420.1	acyl-CoA binding protein 4	Lipids metabolism
RT1-SDT	2688	Pavir.Cb00887.1	30270382	Pavir.Cb00887.1.p|PACid:30270382	-0.39331	0.761380750108029	<.0001	15	AT3G05420.2	acyl-CoA binding protein 4	Lipids metabolism
RT1-SDT	6392	Pavir.Ca00101.1	30205689	Pavir.Ca00101.1.p|PACid:30205689	0.176	1.12974721457012	0.5179	3	AT3G05970.1	long-chain acyl-CoA synthetase 6	Lipids metabolism
RT1-SDT	3580	Pavir.Bb03608.1	30299000	Pavir.Bb03608.1.p|PACid:30299000	0.63489	1.55281934892942	<.0001	10	AT3G06810.1	acyl-CoA dehydrogenase-related	Lipids metabolism
RT1-SDT	3024	Pavir.Cb01371.1	30269906	Pavir.Cb01371.1.p|PACid:30269906	0.4197	1.3376493694969	0.0001	12	AT3G06860.1	multifunctional protein 2	Lipids metabolism
RT1-SDT	3069	Pavir.Eb02374.1	30309378	Pavir.Eb02374.1.p|PACid:30309378	0.93907	1.91729190231247	<.0001	3	AT3G06860.1	multifunctional protein 2	Lipids metabolism
RT1-SDT	2918	Pavir.J22749.1	30202008	Pavir.J22749.1.p|PACid:30202008	0.88374	1.84515242516948	<.0001	4	AT3G06860.1	multifunctional protein 2	Lipids metabolism
RT1-SDT	5802	Pavir.Ga02711.1	30304253	Pavir.Ga02711.1.p|PACid:30304253	0.4592	1.3747792672369	0.0013	3	AT3G07020.1	UDP-Glycosyltransferase superfamily protein	Lipids metabolism
RT1-SDT	6017	Pavir.J14427.1	30273352	Pavir.J14427.1.p|PACid:30273352	0.5436	1.45760518881574	0.0108	2	AT3G07020.2	UDP-Glycosyltransferase superfamily protein	Lipids metabolism
RT1-SDT	900	Pavir.Ea00392.1	30229226	Pavir.Ea00392.1.p|PACid:30229226	0.921	1.89342726247343	<.0001	4	AT3G15730.1	phospholipase D alpha 1	Lipids metabolism
RT1-SDT	909	Pavir.J37463.1	30219840	Pavir.J37463.1.p|PACid:30219840	0.4264	1.34387597560994	0.0007	6	AT3G15730.1	phospholipase D alpha 1	Lipids metabolism
RT1-SDT	6795	Pavir.Ib04324.1	30239966	Pavir.Ib04324.1.p|PACid:30239966	1.1037	2.14905141656538	<.0001	3	AT3G23790.1	AMP-dependent synthetase and ligase family protein	Lipids metabolism
RT1-SDT	3493	Pavir.J03864.1	30219254	Pavir.J03864.1.p|PACid:30219254	-0.2765	0.825591487141948	0.1427	3	AT3G25110.1	fatA acyl-ACP thioesterase	Lipids metabolism
RT1-SDT	2842	Pavir.J12440.1	30256142	Pavir.J12440.1.p|PACid:30256142	-0.309	0.807201074504765	0.0696	2	AT3G25110.1	fatA acyl-ACP thioesterase	Lipids metabolism
RT1-SDT	709	Pavir.Fa00866.1	30185526	Pavir.Fa00866.1.p|PACid:30185526	0.3444	1.26962285142472	0.0018	7	AT3G25860.1	2-oxoacid dehydrogenases acyltransferase family protein	Lipids metabolism
RT1-SDT	615	Pavir.J13646.1	30219462	Pavir.J13646.1.p|PACid:30219462	-0.00785	0.994573571177643	0.8972	12	AT3G25860.1	2-oxoacid dehydrogenases acyltransferase family protein	Lipids metabolism
RT1-SDT	2883	Pavir.Aa00948.1	30251814	Pavir.Aa00948.1.p|PACid:30251814	0.8789	1.83897262001685	<.0001	16	AT3G45070.1	P-loop containing nucleoside triphosphate hydrolases superfamily protein	Lipids metabolism
RT1-SDT	4575	Pavir.Ea04042.1	30230500	Pavir.Ea04042.1.p|PACid:30230500	0.556	1.47018733638904	0.0023	3	AT3G45070.1	P-loop containing nucleoside triphosphate hydrolases superfamily protein	Lipids metabolism
RT1-SDT	1504	Pavir.Fa00742.1	30187752	Pavir.Fa00742.1.p|PACid:30187752	-0.01439	0.990075191301267	0.7937	24	AT3G45070.1	P-loop containing nucleoside triphosphate hydrolases superfamily protein	Lipids metabolism
RT1-SDT	6515	Pavir.J26179.1	30219774	Pavir.J26179.1.p|PACid:30219774	0.2263	1.16983089825816	0.1571	2	AT3G45070.1	P-loop containing nucleoside triphosphate hydrolases superfamily protein	Lipids metabolism
RT1-SDT	1921	Pavir.Ga00526.1	30304707	Pavir.Ga00526.1.p|PACid:30304707	0.28521	1.21858762948784	0.0011	19	AT3G48990.1	AMP-dependent synthetase and ligase family protein	Lipids metabolism
RT1-SDT	1495	Pavir.Gb00221.1	30224696	Pavir.Gb00221.1.p|PACid:30224696	0.93378	1.91027454824127	<.0001	21	AT3G48990.1	AMP-dependent synthetase and ligase family protein	Lipids metabolism
RT1-SDT	4841	Pavir.Ib00088.1	30239047	Pavir.Ib00088.1.p|PACid:30239047	0.1247	1.09028099153274	0.36	4	AT3G51460.1	Phosphoinositide phosphatase family protein	Lipids metabolism
RT1-SDT	4311	Pavir.Ca01104.1	30204936	Pavir.Ca01104.1.p|PACid:30204936	0.87451	1.83338528578822	<.0001	7	AT3G51840.1	acyl-CoA oxidase 4	Lipids metabolism
RT1-SDT	6255	Pavir.J18203.1	30274964	Pavir.J18203.1.p|PACid:30274964	0.4019	1.32124682063335	0.0137	3	AT3G51840.1	acyl-CoA oxidase 4	Lipids metabolism
RT1-SDT	7242	Pavir.Ea00444.1	30227041	Pavir.Ea00444.1.p|PACid:30227041	1.2981	2.45904817683308	<.0001	2	AT3G51840.1	acyl-CoA oxidase 4	Lipids metabolism
RT1-SDT	4374	Pavir.J01831.1	30246619	Pavir.J01831.1.p|PACid:30246619	0.2513	1.19027918217192	0.0091	8	AT3G55360.1	3-oxo-5-alpha-steroid 4-dehydrogenase family protein	Lipids metabolism
RT1-SDT	6047	Pavir.Ea03130.1	30226074	Pavir.Ea03130.1.p|PACid:30226074	0.62204	1.53904989109303	<.0001	4	AT4G04870.1	cardiolipin synthase	Lipids metabolism
RT1-SDT	6822	Pavir.Ia02381.1	30215710	Pavir.Ia02381.1.p|PACid:30215710	-0.06558	0.95556108057047	0.8122	2	AT4G12110.1	sterol-4alpha-methyl oxidase 1-1	Lipids metabolism
RT1-SDT	2640	Pavir.Db02126.1	30260966	Pavir.Db02126.1.p|PACid:30260966	0.49354	1.40789525117146	<.0001	13	AT4G16760.1	acyl-CoA oxidase 1	Lipids metabolism
RT1-SDT	4045	Pavir.Ba00655.1	30291746	Pavir.Ba00655.1.p|PACid:30291746	0.09208	1.06590584079946	0.4062	4	AT4G21540.1	sphingosine kinase 1	Lipids metabolism
RT1-SDT	2869	Pavir.Eb01748.1	30313176	Pavir.Eb01748.1.p|PACid:30313176	0.54644	1.46047736607593	<.0001	7	AT4G23850.1	AMP-dependent synthetase and ligase family protein	Lipids metabolism
RT1-SDT	3286	Pavir.J14493.1	30220107	Pavir.J14493.1.p|PACid:30220107	0.8109	1.75430549406053	<.0001	3	AT4G23850.1	AMP-dependent synthetase and ligase family protein	Lipids metabolism
RT1-SDT	2872	Pavir.Cb00901.1	30269979	Pavir.Cb00901.1.p|PACid:30269979	-1.7659	0.294043193387434	<.0001	8	AT4G25050.1	acyl carrier protein 4	Lipids metabolism
RT1-SDT	878	Pavir.Bb00096.1	30299026	Pavir.Bb00096.1.p|PACid:30299026	0.4493	1.36537761065959	<.0001	21	AT4G27270.1	Quinone reductase family protein	Lipids metabolism
RT1-SDT	1431	Pavir.J08676.1	30196992	Pavir.J08676.1.p|PACid:30196992	0.60578	1.52180130004282	<.0001	13	AT4G27270.1	Quinone reductase family protein	Lipids metabolism
RT1-SDT	645	Pavir.J36018.1	30287744	Pavir.J36018.1.p|PACid:30287744	-0.07347	0.950349446734475	0.1036	35	AT4G27270.1	Quinone reductase family protein	Lipids metabolism
RT1-SDT	940	Pavir.Aa02663.1	30249779	Pavir.Aa02663.1.p|PACid:30249779	0.39985	1.3193707259265	<.0001	10	AT4G29010.1	Enoyl-CoA hydratase/isomerase family	Lipids metabolism
RT1-SDT	920	Pavir.Ab00980.1	30235300	Pavir.Ab00980.1.p|PACid:30235300	0.4749	1.38982188139168	<.0001	8	AT4G29010.1	Enoyl-CoA hydratase/isomerase family	Lipids metabolism
RT1-SDT	6001	Pavir.J17059.1	30286572	Pavir.J17059.1.p|PACid:30286572	0.3094	1.2391922271978	0.3041	2	AT4G29010.1	Enoyl-CoA hydratase/isomerase family	Lipids metabolism
RT1-SDT	3683	Pavir.Aa00252.1	30250827	Pavir.Aa00252.1.p|PACid:30250827	0.32644	1.25391538721244	0.0002	7	AT4G30340.1	diacylglycerol kinase 7	Lipids metabolism
RT1-SDT	7702	Pavir.J03121.1	30218119	Pavir.J03121.1.p|PACid:30218119	0.8034	1.74520921920835	0.0001	2	AT4G31780.2	monogalactosyl diacylglycerol synthase 1	Lipids metabolism
RT1-SDT	4268	Pavir.Cb01444.1	30269606	Pavir.Cb01444.1.p|PACid:30269606	0.56826	1.48273420151384	<.0001	8	AT4G33030.1	sulfoquinovosyldiacylglycerol 1	Lipids metabolism
RT1-SDT	4805	Pavir.J18551.1	30295924	Pavir.J18551.1.p|PACid:30295924	0.108	1.07773314504367	0.2911	5	AT4G36480.1	long-chain base1	Lipids metabolism
RT1-SDT	3514	Pavir.Ib03376.1	30239636	Pavir.Ib03376.1.p|PACid:30239636	0.8332	1.78163277084072	<.0001	8	AT4G36750.1	Quinone reductase family protein	Lipids metabolism
RT1-SDT	1163	Pavir.J29503.1	30247219	Pavir.J29503.1.p|PACid:30247219	0.66314	1.58352539054922	<.0001	11	AT4G36750.1	Quinone reductase family protein	Lipids metabolism
RT1-SDT	1305	Pavir.J30741.1	30246598	Pavir.J30741.1.p|PACid:30246598	0.6304	1.54799412915527	<.0001	12	AT4G36750.1	Quinone reductase family protein	Lipids metabolism
RT1-SDT	4894	Pavir.J16520.1	30236707	Pavir.J16520.1.p|PACid:30236707	1.0887	2.12682303938246	<.0001	8	AT4G38690.1	PLC-like phosphodiesterases superfamily protein	Lipids metabolism
RT1-SDT	4064	Pavir.Ea02794.1	30228412	Pavir.Ea02794.1.p|PACid:30228412	1.4163	2.66900128486936	0.0022	2	AT5G08030.1	PLC-like phosphodiesterases superfamily protein	Lipids metabolism
RT1-SDT	5062	Pavir.J02179.1	30254690	Pavir.J02179.1.p|PACid:30254690	0.5525	1.46662496259772	<.0001	5	AT5G13640.1	phospholipid:diacylglycerol acyltransferase	Lipids metabolism
RT1-SDT	3010	Pavir.Ga00226.1	30302284	Pavir.Ga00226.1.p|PACid:30302284	0.888	1.8506088560757	<.0001	10	AT5G16370.1	acyl activating enzyme 5	Lipids metabolism
RT1-SDT	1455	Pavir.J03876.1	30283279	Pavir.J03876.1.p|PACid:30283279	-0.01823	0.987443426862015	0.7392	31	AT5G20060.1	alpha/beta-Hydrolases superfamily protein	Lipids metabolism
RT1-SDT	6209	Pavir.J33746.1	30287595	Pavir.J33746.1.p|PACid:30287595	0.7668	1.70149156584627	0.0077	2	AT5G23050.1	acyl-activating enzyme 17	Lipids metabolism
RT1-SDT	5029	Pavir.Ia00082.1	30209288	Pavir.Ia00082.1.p|PACid:30209288	-2.6418	0.160228201325652	<.0001	2	AT5G27200.1	acyl carrier protein 5	Lipids metabolism
RT1-SDT	2574	Pavir.Ab01313.1	30232232	Pavir.Ab01313.1.p|PACid:30232232	0.11521	1.08313269583039	0.2037	15	AT5G36880.2	acetyl-CoA synthetase	Lipids metabolism
RT1-SDT	2128	Pavir.J03980.1	30271888	Pavir.J03980.1.p|PACid:30271888	0.72592	1.65395501960292	<.0001	10	AT5G36880.2	acetyl-CoA synthetase	Lipids metabolism
RT1-SDT	1313	Pavir.J04995.1	30191185	Pavir.J04995.1.p|PACid:30191185	-0.14397	0.905025282158917	0.0007	40	AT5G42890.1	sterol carrier protein 2	Lipids metabolism
RT1-SDT	3828	Pavir.Ea03892.1	30228097	Pavir.Ea03892.1.p|PACid:30228097	0.56094	1.47523010271184	<.0001	9	AT5G43280.1	delta(3,5),delta(2,4)-dienoyl-CoA isomerase 1	Lipids metabolism
RT1-SDT	313	Pavir.J37678.1	30302024	Pavir.J37678.1.p|PACid:30302024	0.01009	1.00701836917217	0.8051	20	AT5G46290.1	3-ketoacyl-acyl carrier protein synthase I	Lipids metabolism
RT1-SDT	363	Pavir.J18124.1	30254835	Pavir.J18124.1.p|PACid:30254835	-0.09169	0.938422819028679	0.5021	5	AT5G46290.3	3-ketoacyl-acyl carrier protein synthase I	Lipids metabolism
RT1-SDT	6141	Pavir.Gb00234.1	30223345	Pavir.Gb00234.1.p|PACid:30223345	-0.7766	0.583740875811401	0.0002	3	AT5G53470.1	acyl-CoA binding protein 1	Lipids metabolism
RT1-SDT	2035	Pavir.J10442.1	30274580	Pavir.J10442.1.p|PACid:30274580	0.72355	1.65124020091671	<.0001	5	AT5G54500.1	flavodoxin-like quinone reductase 1	Lipids metabolism
RT1-SDT	465	Pavir.Ea03111.1	30229157	Pavir.Ea03111.1.p|PACid:30229157	0.57077	1.48531610696994	<.0001	32	AT5G54500.1	flavodoxin-like quinone reductase 1	Lipids metabolism
RT1-SDT	5367	Pavir.J40398.1	30244398	Pavir.J40398.1.p|PACid:30244398	0.162	1.11883710103571	0.3554	4	AT5G54500.1	flavodoxin-like quinone reductase 1	Lipids metabolism
RT1-SDT	1972	Pavir.Ab02078.1	30234880	Pavir.Ab02078.1.p|PACid:30234880	0.799	1.7398947054173	0.0031	2	AT5G55480.1	SHV3-like 1	Lipids metabolism
RT1-SDT	3729	Pavir.Ab00361.1	30233231	Pavir.Ab00361.1.p|PACid:30233231	0.51254	1.42655957795069	<.0001	7	AT2G07050.1	cycloartenol synthase 1	Lipids metabolism
RT1-SDT	517	Pavir.J01695.1	30294459	Pavir.J01695.1.p|PACid:30294459	0.18201	1.13446334840942	0.005	14	AT1G06030.1	pfkB-like carbohydrate kinase family protein	Major CHO metabolism
RT1-SDT	4053	Pavir.Da01824.1	30193759	Pavir.Da01824.1.p|PACid:30193759	0.2524	1.19118707076829	0.105	6	AT1G10760.1	Pyruvate phosphate dikinase, PEP/pyruvate binding domain	Major CHO metabolism
RT1-SDT	5150	Pavir.Db00587.1	30260336	Pavir.Db00587.1.p|PACid:30260336	0.2613	1.19855822860499	0.2384	2	AT1G10760.1	Pyruvate phosphate dikinase, PEP/pyruvate binding domain	Major CHO metabolism
RT1-SDT	7187	Pavir.Gb00456.1	30223397	Pavir.Gb00456.1.p|PACid:30223397	-0.4059	0.75476529879106	0.125	2	AT1G11720.2	starch synthase 3	Major CHO metabolism
RT1-SDT	1654	Pavir.Ab00047.1	30232437	Pavir.Ab00047.1.p|PACid:30232437	-1.2861	0.410058031556428	<.0001	10	AT1G12240.1	Glycosyl hydrolases family 32 protein	Major CHO metabolism
RT1-SDT	2821	Pavir.J09198.1	30218083	Pavir.J09198.1.p|PACid:30218083	1.7623	3.39238521186649	0.0001	3	AT1G27680.1	ADPGLC-PPase large subunit	Major CHO metabolism
RT1-SDT	6487	Pavir.Bb00960.1	30297692	Pavir.Bb00960.1.p|PACid:30297692	0.89036	1.85363861005103	<.0001	2	AT1G32900.1	UDP-Glycosyltransferase superfamily protein	Major CHO metabolism
RT1-SDT	631	Pavir.J08684.1	30196067	Pavir.J08684.1.p|PACid:30196067	-0.85815	0.551659509854021	<.0001	33	AT1G62660.1	Glycosyl hydrolases family 32 protein	Major CHO metabolism
RT1-SDT	4175	Pavir.Gb00742.1	30221692	Pavir.Gb00742.1.p|PACid:30221692	0.2807	1.21478415837478	0.1938	2	AT1G62660.1	Glycosyl hydrolases family 32 protein	Major CHO metabolism
RT1-SDT	6591	Pavir.J01866.1	30284124	Pavir.J01866.1.p|PACid:30284124	1.8671	3.64798551240311	<.0001	3	AT1G73370.1	sucrose synthase 6	Major CHO metabolism
RT1-SDT	5605	Pavir.Ib00710.1	30239114	Pavir.Ib00710.1.p|PACid:30239114	0.31892	1.2473963996524	0.0014	6	AT1G74910.1	ADP-glucose pyrophosphorylase family protein	Major CHO metabolism
RT1-SDT	534	Pavir.J00648.1	30281996	Pavir.J00648.1.p|PACid:30281996	0.16264	1.11933354316249	0.0207	11	AT2G31390.1	pfkB-like carbohydrate kinase family protein	Major CHO metabolism
RT1-SDT	7270	Pavir.Eb01336.1	30309318	Pavir.Eb01336.1.p|PACid:30309318	0.8693	1.82677632798949	<.0001	3	AT2G35840.1	Sucrose-6F-phosphate phosphohydrolase family protein	Major CHO metabolism
RT1-SDT	5577	Pavir.Ba00128.1	30293342	Pavir.Ba00128.1.p|PACid:30293342	0.6618	1.58205526773847	<.0001	7	AT2G40840.1	disproportionating enzyme 2	Major CHO metabolism
RT1-SDT	1981	Pavir.J17204.1	30197529	Pavir.J17204.1.p|PACid:30197529	-0.1308	0.913324854945832	0.38	2	AT3G13790.1	Glycosyl hydrolases family 32 protein	Major CHO metabolism
RT1-SDT	4227	Pavir.J16232.1	30287340	Pavir.J16232.1.p|PACid:30287340	0.92044	1.89269244778597	<.0001	6	AT3G23920.1	beta-amylase 1	Major CHO metabolism
RT1-SDT	3452	Pavir.J15987.1	30244300	Pavir.J15987.1.p|PACid:30244300	1.25649	2.38913768814891	<.0001	7	AT3G29320.1	Glycosyl transferase, family 35	Major CHO metabolism
RT1-SDT	393	Pavir.Ib01813.1	30239425	Pavir.Ib01813.1.p|PACid:30239425	-0.53259	0.691312539698789	<.0001	104	AT3G43190.1	sucrose synthase 4	Major CHO metabolism
RT1-SDT	2932	Pavir.J37748.1	30220994	Pavir.J37748.1.p|PACid:30220994	1.23797	2.35866413697058	<.0001	10	AT3G46970.1	alpha-glucan phosphorylase 2	Major CHO metabolism
RT1-SDT	3088	Pavir.Ib00606.1	30240355	Pavir.Ib00606.1.p|PACid:30240355	0.7955	1.7356788105141	<.0001	5	AT3G52180.1	dual specificity protein phosphatase (DsPTP1) family protein	Major CHO metabolism
RT1-SDT	3194	Pavir.Ab01813.1	30233058	Pavir.Ab01813.1.p|PACid:30233058	0.51731	1.43128403503596	<.0001	12	AT3G52600.1	cell wall invertase 2	Major CHO metabolism
RT1-SDT	2203	Pavir.Ia03415.1	30214719	Pavir.Ia03415.1.p|PACid:30214719	1.2014	2.29962719973243	<.0001	9	AT4G02280.1	sucrose synthase 3	Major CHO metabolism
RT1-SDT	4204	Pavir.Aa01721.1	30253185	Pavir.Aa01721.1.p|PACid:30253185	0.46146	1.3769345640289	<.0001	11	AT4G09510.1	cytosolic invertase 2	Major CHO metabolism
RT1-SDT	265	Pavir.J02298.1	30207734	Pavir.J02298.1.p|PACid:30207734	-0.46745	0.723241816887072	<.0001	26	AT4G10260.1	pfkB-like carbohydrate kinase family protein	Major CHO metabolism
RT1-SDT	207	Pavir.J40862.1	30201738	Pavir.J40862.1.p|PACid:30201738	-0.8464	0.556170835614679	0.0004	2	AT4G10260.1	pfkB-like carbohydrate kinase family protein	Major CHO metabolism
RT1-SDT	1850	Pavir.Ab03030.1	30236128	Pavir.Ab03030.1.p|PACid:30236128	0.23416	1.17622169021743	0.0002	25	AT4G26620.1	Sucrase/ferredoxin-like family protein	Major CHO metabolism
RT1-SDT	2095	Pavir.Ca00807.1	30205289	Pavir.Ca00807.1.p|PACid:30205289	-0.04923	0.966452009281028	0.6406	6	AT4G29130.1	hexokinase 1	Major CHO metabolism
RT1-SDT	4725	Pavir.Ea00260.1	30228082	Pavir.Ea00260.1.p|PACid:30228082	0.2127	1.1588549497355	0.3009	2	AT4G29130.1	hexokinase 1	Major CHO metabolism
RT1-SDT	4056	Pavir.Eb02922.1	30311509	Pavir.Eb02922.1.p|PACid:30311509	0.2968	1.22841667393036	0.0177	5	AT4G29130.1	hexokinase 1	Major CHO metabolism
RT1-SDT	3402	Pavir.Eb03091.1	30313319	Pavir.Eb03091.1.p|PACid:30313319	0.1591	1.11659035544596	0.4006	2	AT4G29130.1	hexokinase 1	Major CHO metabolism
RT1-SDT	648	Pavir.J00504.1	30220221	Pavir.J00504.1.p|PACid:30220221	0.53736	1.45131431344646	<.0001	52	AT4G29130.1	hexokinase 1	Major CHO metabolism
RT1-SDT	2682	Pavir.J01199.1	30263609	Pavir.J01199.1.p|PACid:30263609	1.9177	3.77820242718897	<.0001	12	AT5G03650.1	starch branching enzyme 2.2	Major CHO metabolism
RT1-SDT	7061	Pavir.Gb00648.1	30221736	Pavir.Gb00648.1.p|PACid:30221736	0.2978	1.22926844265089	0.1274	2	AT5G18480.1	plant glycogenin-like starch initiation protein 6	Major CHO metabolism
RT1-SDT	5428	Pavir.J05550.1	30275556	Pavir.J05550.1.p|PACid:30275556	0.3728	1.29486348021732	0.0108	5	AT5G20280.1	sucrose phosphate synthase 1F	Major CHO metabolism
RT1-SDT	5338	Pavir.Fb01074.1	30280231	Pavir.Fb01074.1.p|PACid:30280231	0.2552	1.19350118596024	0.1125	4	AT5G20280.1	sucrose phosphate synthase 1F	Major CHO metabolism
RT1-SDT	5185	Pavir.J10133.1	30243454	Pavir.J10133.1.p|PACid:30243454	1.1574	2.23055079172628	0.0002	2	AT5G48300.1	ADP glucose pyrophosphorylase 1	Major CHO metabolism
RT1-SDT	6351	Pavir.Ba00488.1	30291971	Pavir.Ba00488.1.p|PACid:30291971	1.2752	2.42032368329005	<.0001	3	AT5G64860.1	disproportionating enzyme	Major CHO metabolism
RT1-SDT	5203	Pavir.Bb02198.1	30300221	Pavir.Bb02198.1.p|PACid:30300221	0.14394	1.10491853157445	0.1022	6	AT1G53030.1	Cytochrome C oxidase copper chaperone (COX17)	Metal binding
RT1-SDT	1565	Pavir.Hb00961.1	30265189	Pavir.Hb00961.1.p|PACid:30265189	-0.12806	0.91506111101481	0.0743	21	AT1G66240.1	homolog of anti-oxidant 1	Metal binding
RT1-SDT	4585	Pavir.Ea01371.1	30230510	Pavir.Ea01371.1.p|PACid:30230510	4.2187	18.6189524455396	<.0001	3	AT1G71050.1	Heavy metal transport/detoxification superfamily protein	Metal binding
RT1-SDT	3450	Pavir.J06710.1	30197449	Pavir.J06710.1.p|PACid:30197449	0.12149	1.08785781044744	0.1176	8	AT2G33740.2	Nitrogen regulatory PII-like, alpha/beta	Metal binding
RT1-SDT	3973	Pavir.Da00234.1	30191457	Pavir.Da00234.1.p|PACid:30191457	0.68035	1.60252848385938	<.0001	7	AT2G40300.1	ferritin 4	Metal binding
RT1-SDT	3712	Pavir.Ea00501.1	30230246	Pavir.Ea00501.1.p|PACid:30230246	1.9039	3.74223459040002	<.0001	5	AT3G09390.1	metallothionein 2A	Metal binding
RT1-SDT	46	Pavir.Eb01268.1	30313696	Pavir.Eb01268.1.p|PACid:30313696	-0.48913	0.712454605514721	<.0001	35	AT3G17390.1	S-adenosylmethionine synthetase family protein	Metal binding
RT1-SDT	13	Pavir.J10341.1	30191141	Pavir.J10341.1.p|PACid:30191141	-0.50016	0.707028364883474	<.0001	15	AT3G17390.1	S-adenosylmethionine synthetase family protein	Metal binding
RT1-SDT	174	Pavir.Aa02034.1	30250807	Pavir.Aa02034.1.p|PACid:30250807	-0.52746	0.693775115636061	<.0001	7	AT3G56240.1	copper chaperone	Metal binding
RT1-SDT	112	Pavir.Ab01333.1	30234569	Pavir.Ab01333.1.p|PACid:30234569	-0.65453	0.635282419343515	<.0001	49	AT3G56240.1	copper chaperone	Metal binding
RT1-SDT	614	Pavir.Ea03953.1	30226595	Pavir.Ea03953.1.p|PACid:30226595	0.40821	1.32703829143776	<.0001	20	AT4G14030.1	selenium-binding protein 1	Metal binding
RT1-SDT	713	Pavir.J27092.1	30208100	Pavir.J27092.1.p|PACid:30208100	0.76663	1.70129108236461	<.0001	15	AT4G14030.1	selenium-binding protein 1	Metal binding
RT1-SDT	1863	Pavir.Ia01909.1	30209725	Pavir.Ia01909.1.p|PACid:30209725	-0.25375	0.838713509825241	<.0001	12	AT4G14710.1	RmlC-like cupins superfamily protein	Metal binding
RT1-SDT	1892	Pavir.Ib00390.1	30242386	Pavir.Ib00390.1.p|PACid:30242386	0.08626	1.06161451403883	0.3907	10	AT4G14710.1	RmlC-like cupins superfamily protein	Metal binding
RT1-SDT	7046	Pavir.Ha00440.1	30317471	Pavir.Ha00440.1.p|PACid:30317471	-0.166	0.891310495896971	0.3654	2	AT4G36390.1	Methylthiotransferase	Metal binding
RT1-SDT	986	Pavir.Ha01805.1	30316267	Pavir.Ha01805.1.p|PACid:30316267	-0.09616	0.93551973961875	0.0372	29	AT5G19140.1	Aluminium induced protein with YGL and LRDR motifs	Metal binding
RT1-SDT	5105	Pavir.Ga01942.1	30304347	Pavir.Ga01942.1.p|PACid:30304347	-0.84533	0.556583482443009	<.0001	9	AT5G63530.1	farnesylated protein 3	Metal binding
RT1-SDT	5055	Pavir.Ea02872.1	30228700	Pavir.Ea02872.1.p|PACid:30228700	-0.4258	0.744425819761989	0.0372	4	AT1G06410.1	trehalose-phosphatase/synthase 7	Minor CHO metabolism
RT1-SDT	6421	Pavir.Da00787.1	30193936	Pavir.Da00787.1.p|PACid:30193936	-0.4371	0.738617832930043	0.0111	2	AT1G14520.1	myo-inositol oxygenase 1	Minor CHO metabolism
RT1-SDT	1245	Pavir.J00345.1	30198837	Pavir.J00345.1.p|PACid:30198837	0.9858	1.98041118154991	0.0013	2	AT1G17160.1	pfkB-like carbohydrate kinase family protein	Minor CHO metabolism
RT1-SDT	4324	Pavir.Ab00470.1	30234523	Pavir.Ab00470.1.p|PACid:30234523	0.2333	1.17552074567349	0.1631	3	AT1G31190.1	myo-inositol monophosphatase like 1	Minor CHO metabolism
RT1-SDT	1823	Pavir.Bb00541.1	30298869	Pavir.Bb00541.1.p|PACid:30298869	-0.3106	0.806306356095404	0.0247	4	AT1G55120.1	beta-fructofuranosidase 5	Minor CHO metabolism
RT1-SDT	5252	Pavir.J14313.1	30202499	Pavir.J14313.1.p|PACid:30202499	-0.02971	0.979617193276707	0.852	4	AT1G55120.1	beta-fructofuranosidase 5	Minor CHO metabolism
RT1-SDT	7790	Pavir.Ib00926.1	30241947	Pavir.Ib00926.1.p|PACid:30241947	-0.4616	0.726180452016037	0.0532	2	AT1G68020.2	UDP-Glycosyltransferase / trehalose-phosphatase family protein	Minor CHO metabolism
RT1-SDT	3429	Pavir.Aa00237.1	30251921	Pavir.Aa00237.1.p|PACid:30251921	0.796	1.73628045520209	0.0001	3	AT2G18700.1	trehalose phosphatase/synthase 11	Minor CHO metabolism
RT1-SDT	2198	Pavir.Ab00237.1	30232181	Pavir.Ab00237.1.p|PACid:30232181	0.56186	1.47617115019024	<.0001	17	AT2G21250.1	NAD(P)-linked oxidoreductase superfamily protein	Minor CHO metabolism
RT1-SDT	1273	Pavir.Ib00587.1	30240634	Pavir.Ib00587.1.p|PACid:30240634	-0.19309	0.874730194694568	0.0024	29	AT2G22240.1	myo-inositol-1-phosphate synthase 2	Minor CHO metabolism
RT1-SDT	5078	Pavir.Ba02622.1	30289630	Pavir.Ba02622.1.p|PACid:30289630	0.46449	1.37982949046101	<.0001	6	AT2G27680.1	NAD(P)-linked oxidoreductase superfamily protein	Minor CHO metabolism
RT1-SDT	5983	Pavir.Ia02350.1	30215761	Pavir.Ia02350.1.p|PACid:30215761	-0.2496	0.84112959356935	0.3869	2	AT2G36850.1	glucan synthase-like 8	Minor CHO metabolism
RT1-SDT	4785	Pavir.Ea03382.1	30230671	Pavir.Ea03382.1.p|PACid:30230671	0.32315	1.25105914856964	0.0009	3	AT2G37770.2	NAD(P)-linked oxidoreductase superfamily protein	Minor CHO metabolism
RT1-SDT	4174	Pavir.J10207.1	30185013	Pavir.J10207.1.p|PACid:30185013	0.73571	1.66521677842504	<.0001	5	AT2G37770.2	NAD(P)-linked oxidoreductase superfamily protein	Minor CHO metabolism
RT1-SDT	1116	Pavir.J10803.1	30248264	Pavir.J10803.1.p|PACid:30248264	0.321	1.24919612565338	0.0039	5	AT2G37770.2	NAD(P)-linked oxidoreductase superfamily protein	Minor CHO metabolism
RT1-SDT	3318	Pavir.J15860.1	30275456	Pavir.J15860.1.p|PACid:30275456	1.9625	3.89736756480683	<.0001	10	AT2G37770.2	NAD(P)-linked oxidoreductase superfamily protein	Minor CHO metabolism
RT1-SDT	3264	Pavir.J25812.1	30220787	Pavir.J25812.1.p|PACid:30220787	1.2136	2.31915621322679	<.0001	7	AT2G37770.2	NAD(P)-linked oxidoreductase superfamily protein	Minor CHO metabolism
RT1-SDT	390	Pavir.J30656.1	30254357	Pavir.J30656.1.p|PACid:30254357	0.77275	1.708523391583	<.0001	48	AT2G37770.2	NAD(P)-linked oxidoreductase superfamily protein	Minor CHO metabolism
RT1-SDT	2747	Pavir.J34655.1	30270543	Pavir.J34655.1.p|PACid:30270543	1.6803	3.20494589083355	<.0001	4	AT2G37770.2	NAD(P)-linked oxidoreductase superfamily protein	Minor CHO metabolism
RT1-SDT	1380	Pavir.Ea03381.1	30229122	Pavir.Ea03381.1.p|PACid:30229122	0.76805	1.7029664347943	<.0001	4	AT2G37790.1	NAD(P)-linked oxidoreductase superfamily protein	Minor CHO metabolism
RT1-SDT	828	Pavir.J05214.1	30256497	Pavir.J05214.1.p|PACid:30256497	0.44543	1.3617199211201	<.0001	9	AT2G37790.1	NAD(P)-linked oxidoreductase superfamily protein	Minor CHO metabolism
RT1-SDT	7232	Pavir.J40731.1	30255060	Pavir.J40731.1.p|PACid:30255060	2.0647	4.18346974063891	<.0001	4	AT2G47180.1	galactinol synthase 1	Minor CHO metabolism
RT1-SDT	7518	Pavir.J06419.1	30203038	Pavir.J06419.1.p|PACid:30203038	0.3754	1.29719916477363	0.0567	3	AT3G07160.1	glucan synthase-like 10	Minor CHO metabolism
RT1-SDT	5754	Pavir.J23113.1	30306162	Pavir.J23113.1.p|PACid:30306162	0.2276	1.17088549781758	0.2295	2	AT3G07160.1	glucan synthase-like 10	Minor CHO metabolism
RT1-SDT	1515	Pavir.J02493.1	30282927	Pavir.J02493.1.p|PACid:30282927	1.29157	2.44794305858059	<.0001	11	AT3G17770.1	Dihydroxyacetone kinase	Minor CHO metabolism
RT1-SDT	2694	Pavir.J22495.1	30281371	Pavir.J22495.1.p|PACid:30281371	0.4774	1.3922323470943	0.0191	2	AT3G17770.1	Dihydroxyacetone kinase	Minor CHO metabolism
RT1-SDT	3886	Pavir.Ib02879.1	30236982	Pavir.Ib02879.1.p|PACid:30236982	0.08673	1.06196042228102	0.477	3	AT3G17940.1	Galactose mutarotase-like superfamily protein	Minor CHO metabolism
RT1-SDT	4147	Pavir.J32429.1	30194886	Pavir.J32429.1.p|PACid:30194886	0.1445	1.10534750267665	0.1683	6	AT3G47800.1	Galactose mutarotase-like superfamily protein	Minor CHO metabolism
RT1-SDT	3732	Pavir.J33823.1	30281759	Pavir.J33823.1.p|PACid:30281759	0.4579	1.37354102352115	0.0041	2	AT3G47800.1	Galactose mutarotase-like superfamily protein	Minor CHO metabolism
RT1-SDT	5101	Pavir.J33134.1	30217043	Pavir.J33134.1.p|PACid:30217043	1.3564	2.56045463804878	<.0001	6	AT3G57520.1	seed imbibition 2	Minor CHO metabolism
RT1-SDT	5623	Pavir.Aa03356.1	30250945	Pavir.Aa03356.1.p|PACid:30250945	0.456	1.3717332885906	0.0032	3	AT4G30310.2	FGGY family of carbohydrate kinase	Minor CHO metabolism
RT1-SDT	6137	Pavir.Eb01061.1	30310030	Pavir.Eb01061.1.p|PACid:30310030	0.01231	1.0085691485398	0.9366	2	AT4G39120.1	myo-inositol monophosphatase like 2	Minor CHO metabolism
RT1-SDT	5926	Pavir.Db00045.1	30263156	Pavir.Db00045.1.p|PACid:30263156	-0.07206	0.951278712939639	0.7675	2	AT5G13000.1	glucan synthase-like 12	Minor CHO metabolism
RT1-SDT	3857	Pavir.J39415.1	30246868	Pavir.J39415.1.p|PACid:30246868	-0.7143	0.609500791732994	0.0034	3	AT5G15140.1	Galactose mutarotase-like superfamily protein	Minor CHO metabolism
RT1-SDT	2997	Pavir.J38467.1	30208398	Pavir.J38467.1.p|PACid:30208398	0.88831	1.85100654953787	<.0001	10	AT5G19150.1	pfkB-like carbohydrate kinase family protein	Minor CHO metabolism
RT1-SDT	7315	Pavir.Ea00408.1	30226809	Pavir.Ea00408.1.p|PACid:30226809	0.9252	1.89894747367226	0.0003	2	AT5G40390.1	Raffinose synthase family protein	Minor CHO metabolism
RT1-SDT	4405	Pavir.Ga00029.1	30303751	Pavir.Ga00029.1.p|PACid:30303751	0.273	1.20831784338994	0.1083	2	AT5G42810.1	inositol-pentakisphosphate 2-kinase 1	Minor CHO metabolism
RT1-SDT	2634	Pavir.Bb03480.1	30300915	Pavir.Bb03480.1.p|PACid:30300915	0.50342	1.41757002200204	<.0001	15	AT5G49650.1	xylulose kinase-2	Minor CHO metabolism
RT1-SDT	4083	Pavir.J24685.1	30302257	Pavir.J24685.1.p|PACid:30302257	1.1849	2.27347635563781	<.0001	11	AT5G51970.1	GroES-like zinc-binding alcohol dehydrogenase family protein	Minor CHO metabolism
RT1-SDT	3216	Pavir.Ha01293.1	30318445	Pavir.Ha01293.1.p|PACid:30318445	0.4617	1.37716364347727	0.0096	2	AT5G53850.2	haloacid dehalogenase-like hydrolase family protein	Minor CHO metabolism
RT1-SDT	1375	Pavir.Ga00119.1	30304062	Pavir.Ga00119.1.p|PACid:30304062	0.22799	1.1712020630366	<.0001	25	AT5G57330.1	Galactose mutarotase-like superfamily protein	Minor CHO metabolism
RT1-SDT	2759	Pavir.Fb01031.1	30278086	Pavir.Fb01031.1.p|PACid:30278086	0.53564	1.44958506845551	<.0001	13	AT5G57330.1	Galactose mutarotase-like superfamily protein	Minor CHO metabolism
RT1-SDT	926	Pavir.Ba00189.1	30293113	Pavir.Ba00189.1.p|PACid:30293113	1.18996	2.28146417524151	<.0001	34	AT5G57655.2	xylose isomerase family protein	Minor CHO metabolism
RT1-SDT	3038	Pavir.Ib03866.1	30241902	Pavir.Ib03866.1.p|PACid:30241902	0.28893	1.22173382134061	0.0033	5	AT3G02870.1	Inositol monophosphatase family protein	Minor CHO metabolism
RT1-SDT	4503	Pavir.J40755.1	30307963	Pavir.J40755.1.p|PACid:30307963	0.1029	1.07393002988297	0.5313	3	AT3G02870.1	Inositol monophosphatase family protein	Minor CHO metabolism
RT1-SDT	6491	Pavir.J22931.1	30216580	Pavir.J22931.1.p|PACid:30216580	0.3569	1.28067108889774	0.0152	2	AT1G02410.1	cytochrome c oxidase assembly protein CtaG / Cox11 family	Mitochondrial electron transport / ATP synthesis
RT1-SDT	6522	Pavir.Ha01832.1	30318014	Pavir.Ha01832.1.p|PACid:30318014	1.2036	2.3031366311017	<.0001	3	AT1G15120.1	Ubiquinol-cytochrome C reductase hinge protein	Mitochondrial electron transport / ATP synthesis
RT1-SDT	5750	Pavir.J10328.1	30314966	Pavir.J10328.1.p|PACid:30314966	0.969	1.95748330079487	<.0001	5	AT1G15120.2	Ubiquinol-cytochrome C reductase hinge protein	Mitochondrial electron transport / ATP synthesis
RT1-SDT	5097	Pavir.Ea01058.1	30226869	Pavir.Ea01058.1.p|PACid:30226869	0.30848	1.2384022519158	0.0009	5	AT1G19580.1	gamma carbonic anhydrase 1	Mitochondrial electron transport / ATP synthesis
RT1-SDT	3241	Pavir.Eb01170.1	30310233	Pavir.Eb01170.1.p|PACid:30310233	0.03916	1.02751538816327	0.7417	5	AT1G19580.1	gamma carbonic anhydrase 1	Mitochondrial electron transport / ATP synthesis
RT1-SDT	3909	Pavir.J38956.1	30247463	Pavir.J38956.1.p|PACid:30247463	0.06482	1.04595443158543	0.6928	2	AT1G19580.1	gamma carbonic anhydrase 1	Mitochondrial electron transport / ATP synthesis
RT1-SDT	3141	Pavir.Ba00494.1	30290691	Pavir.Ba00494.1.p|PACid:30290691	-1.1077	0.464033221199448	<.0001	12	AT1G22450.1	cytochrome C oxidase 6B	Mitochondrial electron transport / ATP synthesis
RT1-SDT	6715	Pavir.J08720.1	30295101	Pavir.J08720.1.p|PACid:30295101	0.4543	1.37011785834431	0.0394	2	AT1G22450.1	cytochrome C oxidase 6B	Mitochondrial electron transport / ATP synthesis
RT1-SDT	1183	Pavir.J02762.1	30202502	Pavir.J02762.1.p|PACid:30202502	0.6212	1.53815404991933	0.0156	3	AT1G22840.1	CYTOCHROME C-1	Mitochondrial electron transport / ATP synthesis
RT1-SDT	1171	Pavir.J01294.1	30258572	Pavir.J01294.1.p|PACid:30258572	0.9247	1.89828946265976	<.0001	4	AT1G22840.1	CYTOCHROME C-1	Mitochondrial electron transport / ATP synthesis
RT1-SDT	442	Pavir.Ba00012.1	30288503	Pavir.Ba00012.1.p|PACid:30288503	0.2784	1.21284904560725	<.0001	12	AT1G47260.1	gamma carbonic anhydrase 2	Mitochondrial electron transport / ATP synthesis
RT1-SDT	468	Pavir.Bb03499.1	30300013	Pavir.Bb03499.1.p|PACid:30300013	0.27524	1.21019539492091	<.0001	13	AT1G47260.1	gamma carbonic anhydrase 2	Mitochondrial electron transport / ATP synthesis
RT1-SDT	988	Pavir.Ia00212.1	30212801	Pavir.Ia00212.1.p|PACid:30212801	0.3555	1.27942892072268	0.0041	8	AT1G50940.1	electron transfer flavoprotein alpha	Mitochondrial electron transport / ATP synthesis
RT1-SDT	1190	Pavir.J06399.1	30263863	Pavir.J06399.1.p|PACid:30263863	0.1899	1.14068464689344	0.5993	2	AT1G50940.1	electron transfer flavoprotein alpha	Mitochondrial electron transport / ATP synthesis
RT1-SDT	2584	Pavir.Ia00443.1	30209915	Pavir.Ia00443.1.p|PACid:30209915	0.28253	1.21632604038766	<.0001	14	AT1G79010.1	Alpha-helical ferredoxin	Mitochondrial electron transport / ATP synthesis
RT1-SDT	3277	Pavir.Ib00181.1	30239939	Pavir.Ib00181.1.p|PACid:30239939	0.6897	1.61294808044497	0.0016	2	AT2G02050.1	NADH-ubiquinone oxidoreductase B18 subunit, putative	Mitochondrial electron transport / ATP synthesis
RT1-SDT	1747	Pavir.Ab03234.1	30236398	Pavir.Ab03234.1.p|PACid:30236398	0.42943	1.34670139824432	<.0001	10	AT2G20360.1	NAD(P)-binding Rossmann-fold superfamily protein	Mitochondrial electron transport / ATP synthesis
RT1-SDT	1248	Pavir.J03648.1	30255467	Pavir.J03648.1.p|PACid:30255467	0.67934	1.60140698049411	<.0001	19	AT2G20360.1	NAD(P)-binding Rossmann-fold superfamily protein	Mitochondrial electron transport / ATP synthesis
RT1-SDT	2817	Pavir.J10522.1	30286728	Pavir.J10522.1.p|PACid:30286728	0.17844	1.13165954913556	0.0864	2	AT2G20360.1	NAD(P)-binding Rossmann-fold superfamily protein	Mitochondrial electron transport / ATP synthesis
RT1-SDT	824	Pavir.Ia04686.1	30211860	Pavir.Ia04686.1.p|PACid:30211860	0.60198	1.51779821167719	<.0001	5	AT2G33040.1	gamma subunit of Mt ATP synthase	Mitochondrial electron transport / ATP synthesis
RT1-SDT	916	Pavir.Ib00746.1	30241186	Pavir.Ib00746.1.p|PACid:30241186	0.4339	1.35088044539319	0.0272	3	AT2G33040.1	gamma subunit of Mt ATP synthase	Mitochondrial electron transport / ATP synthesis
RT1-SDT	6431	Pavir.Ib03747.1	30240649	Pavir.Ib03747.1.p|PACid:30240649	0.8511	1.80387578757284	<.0001	4	AT2G43400.1	electron-transfer flavoprotein:ubiquinone oxidoreductase	Mitochondrial electron transport / ATP synthesis
RT1-SDT	1230	Pavir.Fb00424.1	30280758	Pavir.Fb00424.1.p|PACid:30280758	0.31238	1.24175452154034	<.0001	27	AT3G03070.1	NADH-ubiquinone oxidoreductase-related	Mitochondrial electron transport / ATP synthesis
RT1-SDT	4159	Pavir.Ib03052.1	30239269	Pavir.Ib03052.1.p|PACid:30239269	0.56814	1.4826108762791	<.0001	7	AT3G03100.1	NADH:ubiquinone oxidoreductase, 17.2kDa subunit	Mitochondrial electron transport / ATP synthesis
RT1-SDT	6493	Pavir.Ib01375.1	30239296	Pavir.Ib01375.1.p|PACid:30239296	0.5754	1.490090546679	0.0066	3	AT3G06310.1	Cox19-like CHCH family protein	Mitochondrial electron transport / ATP synthesis
RT1-SDT	1369	Pavir.Ea01501.1	30230988	Pavir.Ea01501.1.p|PACid:30230988	0.10394	1.07470447622341	0.0428	12	AT3G12260.1	LYR family of Fe/S cluster biogenesis protein	Mitochondrial electron transport / ATP synthesis
RT1-SDT	1902	Pavir.Eb01334.1	30314306	Pavir.Eb01334.1.p|PACid:30314306	0.45669	1.37238950651568	<.0001	6	AT3G12260.1	LYR family of Fe/S cluster biogenesis protein	Mitochondrial electron transport / ATP synthesis
RT1-SDT	2039	Pavir.Ea02163.1	30231351	Pavir.Ea02163.1.p|PACid:30231351	-1.2026	0.434491542511701	<.0001	10	AT3G15640.1	Rubredoxin-like superfamily protein	Mitochondrial electron transport / ATP synthesis
RT1-SDT	1777	Pavir.Eb02048.1	30313661	Pavir.Eb02048.1.p|PACid:30313661	-1.2576	0.418239144396472	<.0001	13	AT3G15640.1	Rubredoxin-like superfamily protein	Mitochondrial electron transport / ATP synthesis
RT1-SDT	2726	Pavir.J08153.1	30198772	Pavir.J08153.1.p|PACid:30198772	-0.64748	0.63839444363163	<.0001	11	AT3G15640.2	Rubredoxin-like superfamily protein	Mitochondrial electron transport / ATP synthesis
RT1-SDT	6680	Pavir.J16145.1	30301857	Pavir.J16145.1.p|PACid:30301857	1.2113	2.31546187068274	0.001	3	AT3G18410.1	Complex I subunit NDUFS6	Mitochondrial electron transport / ATP synthesis
RT1-SDT	6460	Pavir.Ab02811.1	30233444	Pavir.Ab02811.1.p|PACid:30233444	0.493	1.4073683753254	0.002	2	AT3G22370.1	alternative oxidase 1A	Mitochondrial electron transport / ATP synthesis
RT1-SDT	2206	Pavir.Fa00191.1	30187972	Pavir.Fa00191.1.p|PACid:30187972	0.46909	1.38423606649745	<.0001	12	AT3G27240.1	Cytochrome C1 family	Mitochondrial electron transport / ATP synthesis
RT1-SDT	7427	Pavir.Gb00786.1	30224289	Pavir.Gb00786.1.p|PACid:30224289	0.5858	1.50087101818882	0.0002	2	AT3G27620.1	alternative oxidase 1C	Mitochondrial electron transport / ATP synthesis
RT1-SDT	4942	Pavir.Ea04000.1	30226100	Pavir.Ea04000.1.p|PACid:30226100	0.2068	1.15412541067138	0.0709	2	AT3G27890.1	NADPH:quinone oxidoreductase	Mitochondrial electron transport / ATP synthesis
RT1-SDT	4111	Pavir.Eb03945.1	30309322	Pavir.Eb03945.1.p|PACid:30309322	1.24389	2.3683626381955	<.0001	6	AT3G27890.1	NADPH:quinone oxidoreductase	Mitochondrial electron transport / ATP synthesis
RT1-SDT	1615	Pavir.Aa02392.1	30249313	Pavir.Aa02392.1.p|PACid:30249313	0.54567	1.45969808321336	<.0001	31	AT3G48680.1	gamma carbonic anhydrase-like 2	Mitochondrial electron transport / ATP synthesis
RT1-SDT	2323	Pavir.Fa00648.1	30186795	Pavir.Fa00648.1.p|PACid:30186795	0.009687	1.00673710964411	0.9482	2	AT3G52300.1	ATP synthase D chain, mitochondrial	Mitochondrial electron transport / ATP synthesis
RT1-SDT	610	Pavir.Ca01395.1	30206149	Pavir.Ca01395.1.p|PACid:30206149	0.30886	1.23872848498928	<.0001	60	AT4G02580.1	NADH-ubiquinone oxidoreductase 24 kDa subunit, putative	Mitochondrial electron transport / ATP synthesis
RT1-SDT	3743	Pavir.Db00344.1	30262438	Pavir.Db00344.1.p|PACid:30262438	1.34803	2.5456428051555	<.0001	9	AT4G05020.1	NAD(P)H dehydrogenase B2	Mitochondrial electron transport / ATP synthesis
RT1-SDT	1297	Pavir.Fb00354.1	30280831	Pavir.Fb00354.1.p|PACid:30280831	0.63227	1.55000191722948	<.0001	9	AT4G05020.1	NAD(P)H dehydrogenase B2	Mitochondrial electron transport / ATP synthesis
RT1-SDT	6958	Pavir.Da01888.1	30191990	Pavir.Da01888.1.p|PACid:30191990	-0.4138	0.750643602843923	0.0993	2	AT4G21090.1	MITOCHONDRIAL FERREDOXIN 2	Mitochondrial electron transport / ATP synthesis
RT1-SDT	897	Pavir.J01605.1	30216899	Pavir.J01605.1.p|PACid:30216899	0.04806	1.03387373295365	0.5413	2	AT4G28510.1	prohibitin 1	Mitochondrial electron transport / ATP synthesis
RT1-SDT	5403	Pavir.Db00176.1	30262908	Pavir.Db00176.1.p|PACid:30262908	0.6282	1.54563535500226	0.0002	2	AT4G34700.1	LYR family of Fe/S cluster biogenesis protein	Mitochondrial electron transport / ATP synthesis
RT1-SDT	981	Pavir.Ba00059.1	30288740	Pavir.Ba00059.1.p|PACid:30288740	0.37639	1.29808962870811	<.0001	34	AT5G08530.1	51 kDa subunit of complex I	Mitochondrial electron transport / ATP synthesis
RT1-SDT	17	Pavir.J09810.1	30258564	Pavir.J09810.1.p|PACid:30258564	0.365	1.28788162950983	<.0001	20	AT5G08670.1	ATP synthase alpha/beta family protein	Mitochondrial electron transport / ATP synthesis
RT1-SDT	11	Pavir.Ca00874.1	30205274	Pavir.Ca00874.1.p|PACid:30205274	0.47733	1.39216479719826	<.0001	28	AT5G08690.1	ATP synthase alpha/beta family protein	Mitochondrial electron transport / ATP synthesis
RT1-SDT	12	Pavir.J01466.1	30195685	Pavir.J01466.1.p|PACid:30195685	0.22857	1.17167301063325	<.0001	28	AT5G08690.1	ATP synthase alpha/beta family protein	Mitochondrial electron transport / ATP synthesis
RT1-SDT	3205	Pavir.J04526.1	30272257	Pavir.J04526.1.p|PACid:30272257	0.3984	1.31804534084286	0.0099	4	AT5G13430.1	Ubiquinol-cytochrome C reductase iron-sulfur subunit	Mitochondrial electron transport / ATP synthesis
RT1-SDT	2608	Pavir.Ab01291.1	30235478	Pavir.Ab01291.1.p|PACid:30235478	0.7873	1.72584153043181	0.0001	5	AT5G13440.1	Ubiquinol-cytochrome C reductase iron-sulfur subunit	Mitochondrial electron transport / ATP synthesis
RT1-SDT	3136	Pavir.Aa00791.1	30250648	Pavir.Aa00791.1.p|PACid:30250648	0.88882	1.851661005393	<.0001	8	AT5G13450.1	delta subunit of Mt ATP synthase	Mitochondrial electron transport / ATP synthesis
RT1-SDT	1323	Pavir.Ab02836.1	30234992	Pavir.Ab02836.1.p|PACid:30234992	0.6605	1.58063033353999	<.0001	22	AT5G13450.1	delta subunit of Mt ATP synthase	Mitochondrial electron transport / ATP synthesis
RT1-SDT	3331	Pavir.Ba03478.1	30291380	Pavir.Ba03478.1.p|PACid:30291380	1.2932	2.45071038085959	<.0001	3	AT5G25450.1	Cytochrome bd ubiquinol oxidase, 14kDa subunit	Mitochondrial electron transport / ATP synthesis
RT1-SDT	126	Pavir.Ia00869.1	30209772	Pavir.Ia00869.1.p|PACid:30209772	0.24805	1.18760082446834	<.0001	153	AT5G37510.1	NADH-ubiquinone dehydrogenase, mitochondrial, putative	Mitochondrial electron transport / ATP synthesis
RT1-SDT	3170	Pavir.Gb02561.1	30223201	Pavir.Gb02561.1.p|PACid:30223201	0.54299	1.45698901478473	<.0001	10	AT5G43430.1	electron transfer flavoprotein beta	Mitochondrial electron transport / ATP synthesis
RT1-SDT	1695	Pavir.Ba00909.1	30291485	Pavir.Ba00909.1.p|PACid:30291485	-0.3976	0.759120070086516	0.0014	5	AT5G47030.1	ATPase, F1 complex, delta/epsilon subunit	Mitochondrial electron transport / ATP synthesis
RT1-SDT	1781	Pavir.J01643.1	30296509	Pavir.J01643.1.p|PACid:30296509	0.02344	1.01638007616189	0.8208	10	AT5G47030.1	ATPase, F1 complex, delta/epsilon subunit	Mitochondrial electron transport / ATP synthesis
RT1-SDT	4215	Pavir.Ga02422.1	30303436	Pavir.Ga02422.1.p|PACid:30303436	0.55365	1.46779450366907	<.0001	9	AT5G47890.1	NADH-ubiquinone oxidoreductase B8 subunit, putative	Mitochondrial electron transport / ATP synthesis
RT1-SDT	1764	Pavir.Ia03818.1	30210874	Pavir.Ia03818.1.p|PACid:30210874	-0.60311	0.658333263712952	<.0001	10	AT5G52840.1	NADH-ubiquinone oxidoreductase-related	Mitochondrial electron transport / ATP synthesis
RT1-SDT	1643	Pavir.Ib00500.1	30241692	Pavir.Ib00500.1.p|PACid:30241692	-0.56062	0.678010725147309	<.0001	16	AT5G52840.1	NADH-ubiquinone oxidoreductase-related	Mitochondrial electron transport / ATP synthesis
RT1-SDT	5160	Pavir.J19670.1	30248134	Pavir.J19670.1.p|PACid:30248134	0.375	1.29683955465101	0.0527	2	AT5G60730.1	Anion-transporting ATPase	Mitochondrial electron transport / ATP synthesis
RT1-SDT	2868	Pavir.Bb01195.1	30300589	Pavir.Bb01195.1.p|PACid:30300589	0.21135	1.15777105993336	0.0134	26	AT5G67590.1	NADH-ubiquinone oxidoreductase-related	Mitochondrial electron transport / ATP synthesis
RT1-SDT	3131	Pavir.J25916.1	30281719	Pavir.J25916.1.p|PACid:30281719	0.7527	1.68494324847603	<.0001	12	ATMG00070.1	NADH dehydrogenase subunit 9	Mitochondrial electron transport / ATP synthesis
RT1-SDT	6014	Pavir.J35977.1	30243624	Pavir.J35977.1.p|PACid:30243624	0.861	1.81629683544302	<.0001	5	ATMG00640.1	hydrogen ion transporting ATP synthases, rotational mechanism;zinc ion binding	Mitochondrial electron transport / ATP synthesis
RT1-SDT	4153	Pavir.Ea00807.1	30230804	Pavir.Ea00807.1.p|PACid:30230804	0.03944	1.0277148289469	0.7871	2	AT1G05620.1	uridine-ribohydrolase 2	Nucleotide metabolism
RT1-SDT	3267	Pavir.J07454.1	30185168	Pavir.J07454.1.p|PACid:30185168	0.38026	1.30157640214999	0.0008	4	AT1G05620.1	uridine-ribohydrolase 2	Nucleotide metabolism
RT1-SDT	4277	Pavir.Ea01831.1	30230626	Pavir.Ea01831.1.p|PACid:30230626	0.266	1.20246924889818	0.0189	5	AT1G09830.1	Glycinamide ribonucleotide (GAR) synthetase	Nucleotide metabolism
RT1-SDT	456	Pavir.Ia00476.1	30214263	Pavir.Ia00476.1.p|PACid:30214263	0.009921	1.00690041206274	0.932	9	AT1G16350.1	Aldolase-type TIM barrel family protein	Nucleotide metabolism
RT1-SDT	518	Pavir.J01810.1	30274650	Pavir.J01810.1.p|PACid:30274650	0.01863	1.01299706909872	0.8505	5	AT1G16350.1	Aldolase-type TIM barrel family protein	Nucleotide metabolism
RT1-SDT	4676	Pavir.Aa01628.1	30251818	Pavir.Aa01628.1.p|PACid:30251818	-0.14562	0.903990802892552	0.0618	5	AT1G17410.1	Nucleoside diphosphate kinase family protein	Nucleotide metabolism
RT1-SDT	5564	Pavir.Ab02845.1	30234084	Pavir.Ab02845.1.p|PACid:30234084	0.3989	1.31850221971529	0.0075	3	AT1G26190.1	Phosphoribulokinase / Uridine kinase family	Nucleotide metabolism
RT1-SDT	4670	Pavir.Cb00428.1	30267590	Pavir.Cb00428.1.p|PACid:30267590	0.04279	1.03010399983317	0.7091	5	AT1G27450.1	adenine phosphoribosyl transferase 1	Nucleotide metabolism
RT1-SDT	7656	Pavir.Fa01158.1	30186102	Pavir.Fa01158.1.p|PACid:30186102	0.3094	1.2391922271978	0.0184	2	AT1G28960.1	nudix hydrolase homolog 15	Nucleotide metabolism
RT1-SDT	425	Pavir.Ea01555.1	30230998	Pavir.Ea01555.1.p|PACid:30230998	0.1677	1.12326630208342	0.0117	17	AT1G29900.1	carbamoyl phosphate synthetase B	Nucleotide metabolism
RT1-SDT	671	Pavir.Eb02119.1	30311591	Pavir.Eb02119.1.p|PACid:30311591	-0.2815	0.822735157584887	0.2907	2	AT1G29900.1	carbamoyl phosphate synthetase B	Nucleotide metabolism
RT1-SDT	5832	Pavir.J23842.1	30199228	Pavir.J23842.1.p|PACid:30199228	0.1175	1.0848533252098	0.749	2	AT1G30820.1	CTP synthase family protein	Nucleotide metabolism
RT1-SDT	2975	Pavir.Gb01749.1	30222651	Pavir.Gb01749.1.p|PACid:30222651	0.3743	1.29621047680193	0.0061	2	AT1G31220.1	Formyl transferase	Nucleotide metabolism
RT1-SDT	4309	Pavir.Ib01473.1	30242616	Pavir.Ib01473.1.p|PACid:30242616	0.50771	1.42179158372082	<.0001	5	AT1G36280.1	L-Aspartase-like family protein	Nucleotide metabolism
RT1-SDT	2643	Pavir.J01498.1	30190052	Pavir.J01498.1.p|PACid:30190052	0.06254	1.04430273624592	0.5428	7	AT1G55810.1	uridine kinase-like 3	Nucleotide metabolism
RT1-SDT	1736	Pavir.Fb00752.1	30279198	Pavir.Fb00752.1.p|PACid:30279198	0.27144	1.20701198385048	0.003	8	AT1G63660.1	GMP synthase (glutamine-hydrolyzing), putative / glutamine amidotransferase, putative	Nucleotide metabolism
RT1-SDT	4762	Pavir.Ca01037.1	30203675	Pavir.Ca01037.1.p|PACid:30203675	-0.1561	0.897447842167154	0.1649	4	AT1G71750.1	Hypoxanthine-guanine phosphoribosyltransferase	Nucleotide metabolism
RT1-SDT	3922	Pavir.Ea03896.1	30231016	Pavir.Ea03896.1.p|PACid:30231016	0.2073	1.15452546937948	0.2178	3	AT1G74260.1	purine biosynthesis 4	Nucleotide metabolism
RT1-SDT	3915	Pavir.Eb03716.1	30309428	Pavir.Eb03716.1.p|PACid:30309428	0.4944	1.4087347569806	0.0007	4	AT1G74260.1	purine biosynthesis 4	Nucleotide metabolism
RT1-SDT	6044	Pavir.Ab03150.1	30235596	Pavir.Ab03150.1.p|PACid:30235596	1.1754	2.25855492720189	<.0001	2	AT1G79690.1	nudix hydrolase homolog 3	Nucleotide metabolism
RT1-SDT	5325	Pavir.J08653.1	30200044	Pavir.J08653.1.p|PACid:30200044	1.01841	2.02568521308496	<.0001	7	AT1G79690.1	nudix hydrolase homolog 3	Nucleotide metabolism
RT1-SDT	5601	Pavir.J15049.1	30248680	Pavir.J15049.1.p|PACid:30248680	-0.3638	0.777114992330231	0.0386	4	AT2G02970.1	GDA1/CD39 nucleoside phosphatase family protein	Nucleotide metabolism
RT1-SDT	3662	Pavir.Ea00347.1	30230014	Pavir.Ea00347.1.p|PACid:30230014	-0.07835	0.947140265063296	0.4582	5	AT2G05140.1	phosphoribosylaminoimidazole carboxylase family protein / AIR carboxylase family protein	Nucleotide metabolism
RT1-SDT	3776	Pavir.J02952.1	30199571	Pavir.J02952.1.p|PACid:30199571	0.39608	1.31592749352043	<.0001	6	AT2G16570.1	GLN phosphoribosyl pyrophosphate amidotransferase 1	Nucleotide metabolism
RT1-SDT	1034	Pavir.Eb02623.1	30308849	Pavir.Eb02623.1.p|PACid:30308849	-0.4249	0.744890361637368	<.0001	20	AT2G19570.1	cytidine deaminase 1	Nucleotide metabolism
RT1-SDT	1468	Pavir.J31406.1	30282858	Pavir.J31406.1.p|PACid:30282858	-0.775	0.584388624280623	<.0001	7	AT2G19570.1	cytidine deaminase 1	Nucleotide metabolism
RT1-SDT	1602	Pavir.J25860.1	30295576	Pavir.J25860.1.p|PACid:30295576	0.07995	1.05698140774245	0.1954	20	AT2G21790.1	ribonucleotide reductase 1	Nucleotide metabolism
RT1-SDT	7685	Pavir.J05437.1	30197223	Pavir.J05437.1.p|PACid:30197223	0.2283	1.17145375285307	0.2082	2	AT2G26230.1	uricase / urate oxidase / nodulin 35, putative	Nucleotide metabolism
RT1-SDT	1027	Pavir.Ba01402.1	30288841	Pavir.Ba01402.1.p|PACid:30288841	0.09603	1.06882821663787	0.0895	20	AT2G35040.1	AICARFT/IMPCHase bienzyme family protein	Nucleotide metabolism
RT1-SDT	2575	Pavir.Fa01743.1	30186283	Pavir.Fa01743.1.p|PACid:30186283	0.02913	1.02039660215957	0.8213	3	AT2G35040.1	AICARFT/IMPCHase bienzyme family protein	Nucleotide metabolism
RT1-SDT	2818	Pavir.J32490.1	30247837	Pavir.J32490.1.p|PACid:30247837	0.2129	1.15901561227974	0.2395	3	AT2G35040.1	AICARFT/IMPCHase bienzyme family protein	Nucleotide metabolism
RT1-SDT	3820	Pavir.Fb02170.1	30278471	Pavir.Fb02170.1.p|PACid:30278471	-0.06856	0.953589331156049	0.5586	6	AT2G36310.1	uridine-ribohydrolase 1	Nucleotide metabolism
RT1-SDT	4584	Pavir.Ib00228.1	30242362	Pavir.Ib00228.1.p|PACid:30242362	-0.9402	0.521160627208592	0.0005	4	AT2G37250.1	adenosine kinase	Nucleotide metabolism
RT1-SDT	3863	Pavir.Eb00115.1	30309150	Pavir.Eb00115.1.p|PACid:30309150	0.173	1.12740041214542	0.1212	5	AT2G37690.1	phosphoribosylaminoimidazole carboxylase, putative / AIR carboxylase, putative	Nucleotide metabolism
RT1-SDT	3691	Pavir.Eb00117.1	30310974	Pavir.Eb00117.1.p|PACid:30310974	0.3176	1.2462556109441	0.0149	4	AT2G37690.1	phosphoribosylaminoimidazole carboxylase, putative / AIR carboxylase, putative	Nucleotide metabolism
RT1-SDT	3092	Pavir.J35092.1	30258673	Pavir.J35092.1.p|PACid:30258673	0.15766	1.11547640697454	0.1142	5	AT2G37690.1	phosphoribosylaminoimidazole carboxylase, putative / AIR carboxylase, putative	Nucleotide metabolism
RT1-SDT	5125	Pavir.Ib04135.1	30242235	Pavir.Ib04135.1.p|PACid:30242235	-0.2074	0.866096690115971	0.1486	3	AT2G38680.1	5\'-nucleotidases;magnesium ion binding	Nucleotide metabolism
RT1-SDT	3524	Pavir.Gb00086.1	30223474	Pavir.Gb00086.1.p|PACid:30223474	-0.4422	0.736011391167255	0.0006	9	AT2G39270.1	P-loop containing nucleoside triphosphate hydrolases superfamily protein	Nucleotide metabolism
RT1-SDT	3513	Pavir.Cb00928.1	30268312	Pavir.Cb00928.1.p|PACid:30268312	-0.7024	0.61454902083571	<.0001	9	AT2G41880.1	guanylate kinase 1	Nucleotide metabolism
RT1-SDT	1743	Pavir.J16946.1	30256398	Pavir.J16946.1.p|PACid:30256398	-1.15824	0.4480588066169	<.0001	17	AT2G41880.1	guanylate kinase 1	Nucleotide metabolism
RT1-SDT	3435	Pavir.J05089.2	30275178	Pavir.J05089.2.p|PACid:30275178	-0.4564	0.728802594407869	0.0044	3	AT2G46860.1	pyrophosphorylase 3	Nucleotide metabolism
RT1-SDT	4196	Pavir.J10537.1	30216759	Pavir.J10537.1.p|PACid:30216759	2.03356	4.09413876135954	<.0001	6	AT3G04080.1	apyrase 1	Nucleotide metabolism
RT1-SDT	6071	Pavir.Ib02000.1	30242604	Pavir.Ib02000.1.p|PACid:30242604	-0.2575	0.83653627105918	0.1357	2	AT3G07800.1	Thymidine kinase	Nucleotide metabolism
RT1-SDT	193	Pavir.J10032.1	30190366	Pavir.J10032.1.p|PACid:30190366	0.45497	1.37075430064898	<.0001	21	AT3G09820.1	adenosine kinase 1	Nucleotide metabolism
RT1-SDT	3826	Pavir.Ba01092.1	30292439	Pavir.Ba01092.1.p|PACid:30292439	0.003769	1.00261588720142	0.9751	4	AT3G12600.1	nudix hydrolase homolog 16	Nucleotide metabolism
RT1-SDT	3638	Pavir.J38002.1	30197585	Pavir.J38002.1.p|PACid:30197585	-0.1725	0.887303767922352	0.1703	3	AT3G12670.1	CTP synthase family protein	Nucleotide metabolism
RT1-SDT	808	Pavir.Ab02958.1	30232703	Pavir.Ab02958.1.p|PACid:30232703	0.247	1.18673679765653	<.0001	54	AT3G17810.1	pyrimidine 1	Nucleotide metabolism
RT1-SDT	3188	Pavir.J14834.1	30225404	Pavir.J14834.1.p|PACid:30225404	0.65469	1.57427764289842	<.0001	11	AT3G21110.1	purin 7	Nucleotide metabolism
RT1-SDT	960	Pavir.J30377.1	30281742	Pavir.J30377.1.p|PACid:30281742	0.02536	1.01773361852763	0.5428	28	AT3G27740.1	carbamoyl phosphate synthetase A	Nucleotide metabolism
RT1-SDT	6692	Pavir.Ca00678.1	30203120	Pavir.Ca00678.1.p|PACid:30203120	0.09848	1.07064485411671	0.5456	3	AT3G46200.1	nudix hydrolase homolog 9	Nucleotide metabolism
RT1-SDT	4864	Pavir.J13820.1	30277515	Pavir.J13820.1.p|PACid:30277515	0.25599	1.19415490979481	0.0062	9	AT3G46200.1	nudix hydrolase homolog 9	Nucleotide metabolism
RT1-SDT	1225	Pavir.Ia01019.1	30214264	Pavir.Ia01019.1.p|PACid:30214264	-0.70101	0.615141408525465	<.0001	30	AT3G46940.1	DUTP-PYROPHOSPHATASE-LIKE 1	Nucleotide metabolism
RT1-SDT	4500	Pavir.Ca00645.1	30203092	Pavir.Ca00645.1.p|PACid:30203092	-0.135	0.910669833591978	0.664	2	AT3G53620.1	pyrophosphorylase 4	Nucleotide metabolism
RT1-SDT	4487	Pavir.Aa01037.1	30252726	Pavir.Aa01037.1.p|PACid:30252726	0.5385	1.45246157750769	0.0004	2	AT3G53620.1	pyrophosphorylase 4	Nucleotide metabolism
RT1-SDT	7268	Pavir.Ga00081.1	30302860	Pavir.Ga00081.1.p|PACid:30302860	0.7107	1.63659800680704	<.0001	2	AT3G53900.2	uracil phosphoribosyltransferase	Nucleotide metabolism
RT1-SDT	5215	Pavir.J29976.1	30190971	Pavir.J29976.1.p|PACid:30190971	0.5578	1.47202278233451	0.0023	3	AT3G54470.1	uridine 5\'-monophosphate synthase / UMP synthase (PYRE-F) (UMPS)	Nucleotide metabolism
RT1-SDT	3198	Pavir.J32419.1	30294961	Pavir.J32419.1.p|PACid:30294961	0.2525	1.19126964042587	0.1015	4	AT3G54470.1	uridine 5\'-monophosphate synthase / UMP synthase (PYRE-F) (UMPS)	Nucleotide metabolism
RT1-SDT	4658	Pavir.J32420.1	30294962	Pavir.J32420.1.p|PACid:30294962	1.30843	2.47671866581613	<.0001	2	AT3G54470.1	uridine 5\'-monophosphate synthase / UMP synthase (PYRE-F) (UMPS)	Nucleotide metabolism
RT1-SDT	1411	Pavir.Ca00818.1	30204865	Pavir.Ca00818.1.p|PACid:30204865	0.15734	1.11522901382786	0.03	18	AT3G55010.1	phosphoribosylformylglycinamidine cyclo-ligase, chloroplast / phosphoribosyl-aminoimidazole synthetase / AIR synthase (PUR5)	Nucleotide metabolism
RT1-SDT	2699	Pavir.Aa01068.1	30249821	Pavir.Aa01068.1.p|PACid:30249821	0.56442	1.4787928774824	<.0001	5	AT3G57560.1	N-acetyl-l-glutamate kinase	Nucleotide metabolism
RT1-SDT	1082	Pavir.Ha01843.1	30316598	Pavir.Ha01843.1.p|PACid:30316598	0.3424	1.26786399984973	0.0292	4	AT3G57610.1	adenylosuccinate synthase	Nucleotide metabolism
RT1-SDT	976	Pavir.Hb01925.1	30265512	Pavir.Hb01925.1.p|PACid:30265512	-0.08107	0.945356246666748	0.4323	6	AT3G57610.1	adenylosuccinate synthase	Nucleotide metabolism
RT1-SDT	4965	Pavir.Ib04408.1	30239847	Pavir.Ib04408.1.p|PACid:30239847	0.1789	1.132020433714	0.1602	3	AT3G57610.1	adenylosuccinate synthase	Nucleotide metabolism
RT1-SDT	5524	Pavir.J06753.2	30216190	Pavir.J06753.2.p|PACid:30216190	0.38981	1.3102208390781	<.0001	5	AT4G02120.1	CTP synthase family protein	Nucleotide metabolism
RT1-SDT	4521	Pavir.Gb00236.1	30221953	Pavir.Gb00236.1.p|PACid:30221953	-0.7895	0.578544565478417	<.0001	5	AT4G04955.1	allantoinase	Nucleotide metabolism
RT1-SDT	3594	Pavir.Ba00935.1	30288523	Pavir.Ba00935.1.p|PACid:30288523	0.3261	1.25361991173996	<.0001	8	AT4G09320.1	Nucleoside diphosphate kinase family protein	Nucleotide metabolism
RT1-SDT	5910	Pavir.Bb02779.1	30299073	Pavir.Bb02779.1.p|PACid:30299073	0.07362	1.05235393246017	0.4268	6	AT4G09320.1	Nucleoside diphosphate kinase family protein	Nucleotide metabolism
RT1-SDT	488	Pavir.Ib02268.1	30239699	Pavir.Ib02268.1.p|PACid:30239699	0.13705	1.09965425976663	<.0001	56	AT4G09320.1	Nucleoside diphosphate kinase family protein	Nucleotide metabolism
RT1-SDT	4907	Pavir.J10100.1	30198706	Pavir.J10100.1.p|PACid:30198706	0.7052	1.6303706665058	<.0001	3	AT4G09320.1	Nucleoside diphosphate kinase family protein	Nucleotide metabolism
RT1-SDT	6243	Pavir.J05389.1	30225859	Pavir.J05389.1.p|PACid:30225859	0.5176	1.43157177019731	0.0008	3	AT4G11980.1	nudix hydrolase homolog 14	Nucleotide metabolism
RT1-SDT	4646	Pavir.Ia03483.1	30214629	Pavir.Ia03483.1.p|PACid:30214629	0.59755	1.5131447449475	<.0001	5	AT4G18440.1	L-Aspartase-like family protein	Nucleotide metabolism
RT1-SDT	6573	Pavir.J04363.1	30287284	Pavir.J04363.1.p|PACid:30287284	0.2452	1.18525707107231	0.2353	2	AT4G19180.1	GDA1/CD39 nucleoside phosphatase family protein	Nucleotide metabolism
RT1-SDT	6618	Pavir.Ib00028.1	30241930	Pavir.Ib00028.1.p|PACid:30241930	0.4979	1.41215651776142	0.0008	2	AT4G20960.1	Cytidine/deoxycytidylate deaminase family protein	Nucleotide metabolism
RT1-SDT	2949	Pavir.Eb03117.1	30309642	Pavir.Eb03117.1.p|PACid:30309642	0.535	1.44894215455488	0.0006	3	AT4G22930.1	pyrimidin 4	Nucleotide metabolism
RT1-SDT	3466	Pavir.J06000.1	30254674	Pavir.J06000.1.p|PACid:30254674	0.41271	1.33118400147374	<.0001	12	AT4G23900.1	Nucleoside diphosphate kinase family protein	Nucleotide metabolism
RT1-SDT	3565	Pavir.Gb02257.1	30223836	Pavir.Gb02257.1.p|PACid:30223836	-0.08983	0.939633464419545	0.5328	2	AT4G25280.1	P-loop containing nucleoside triphosphate hydrolases superfamily protein	Nucleotide metabolism
RT1-SDT	4157	Pavir.J06703.1	30221130	Pavir.J06703.1.p|PACid:30221130	0.38149	1.30268656166419	<.0001	11	AT4G29680.1	Alkaline-phosphatase-like family protein	Nucleotide metabolism
RT1-SDT	6171	Pavir.J14328.1	30244408	Pavir.J14328.1.p|PACid:30244408	0.8756	1.83477098755971	0.0009	2	AT4G34890.1	xanthine dehydrogenase 1	Nucleotide metabolism
RT1-SDT	5292	Pavir.Ia00199.1	30211642	Pavir.Ia00199.1.p|PACid:30211642	0.6874	1.6103787051347	<.0001	5	AT4G36940.1	nicotinate phosphoribosyltransferase 1	Nucleotide metabolism
RT1-SDT	379	Pavir.Aa01138.1	30252926	Pavir.Aa01138.1.p|PACid:30252926	0.47107	1.38613713981233	<.0001	18	AT5G03300.1	adenosine kinase 2	Nucleotide metabolism
RT1-SDT	110	Pavir.Ab02342.1	30235216	Pavir.Ab02342.1.p|PACid:30235216	0.62047	1.53737594478117	<.0001	11	AT5G03300.1	adenosine kinase 2	Nucleotide metabolism
RT1-SDT	906	Pavir.Ga01171.1	30305338	Pavir.Ga01171.1.p|PACid:30305338	1.43439	2.70267867842978	<.0001	17	AT5G03300.1	adenosine kinase 2	Nucleotide metabolism
RT1-SDT	993	Pavir.J28431.1	30248115	Pavir.J28431.1.p|PACid:30248115	-0.001264	0.999124245660636	0.9911	4	AT5G09650.1	pyrophosphorylase 6	Nucleotide metabolism
RT1-SDT	2176	Pavir.Ea03192.1	30227928	Pavir.Ea03192.1.p|PACid:30227928	0.11291	1.08140729968146	0.1167	8	AT5G12200.1	pyrimidine 2	Nucleotide metabolism
RT1-SDT	2220	Pavir.J36980.1	30190435	Pavir.J36980.1.p|PACid:30190435	0.22425	1.16816980547682	0.0019	14	AT5G12200.1	pyrimidine 2	Nucleotide metabolism
RT1-SDT	4228	Pavir.Ba00244.1	30292717	Pavir.Ba00244.1.p|PACid:30292717	0.16	1.11728713807222	0.3743	3	AT5G18280.1	apyrase 2	Nucleotide metabolism
RT1-SDT	3249	Pavir.Bb03738.1	30301221	Pavir.Bb03738.1.p|PACid:30301221	0.211	1.15749021699012	0.0646	6	AT5G18280.1	apyrase 2	Nucleotide metabolism
RT1-SDT	5177	Pavir.J15793.1	30248019	Pavir.J15793.1.p|PACid:30248019	1.9253	3.79815820648577	<.0001	5	AT5G18280.1	apyrase 2	Nucleotide metabolism
RT1-SDT	7157	Pavir.J35755.1	30217725	Pavir.J35755.1.p|PACid:30217725	0.9101	1.87917574845103	0.0658	2	AT5G18280.1	apyrase 2	Nucleotide metabolism
RT1-SDT	5538	Pavir.Bb01057.1	30301093	Pavir.Bb01057.1.p|PACid:30301093	0.63949	1.55777837943226	<.0001	5	AT5G19460.1	nudix hydrolase homolog 20	Nucleotide metabolism
RT1-SDT	2369	Pavir.Gb00063.1	30223763	Pavir.Gb00063.1.p|PACid:30223763	0.51208	1.42610479521306	<.0001	10	AT5G23300.1	pyrimidine d	Nucleotide metabolism
RT1-SDT	353	Pavir.Aa00305.1	30248974	Pavir.Aa00305.1.p|PACid:30248974	-0.74196	0.59792647620029	<.0001	107	AT5G26667.2	P-loop containing nucleoside triphosphate hydrolases superfamily protein	Nucleotide metabolism
RT1-SDT	2003	Pavir.Ia00240.1	30211812	Pavir.Ia00240.1.p|PACid:30211812	-0.2483	0.841887869744236	0.3058	2	AT5G28050.1	Cytidine/deoxycytidylate deaminase family protein	Nucleotide metabolism
RT1-SDT	1659	Pavir.J27938.1	30197087	Pavir.J27938.1.p|PACid:30197087	-0.46855	0.722690582732434	<.0001	10	AT5G28050.2	Cytidine/deoxycytidylate deaminase family protein	Nucleotide metabolism
RT1-SDT	2313	Pavir.Ba01529.1	30292733	Pavir.Ba01529.1.p|PACid:30292733	0.148	1.10803234786493	0.0118	14	AT5G40870.1	uridine kinase/uracil phosphoribosyltransferase 1	Nucleotide metabolism
RT1-SDT	4588	Pavir.Da00480.1	30192989	Pavir.Da00480.1.p|PACid:30192989	1.46981	2.76985412805004	<.0001	3	AT5G47650.1	nudix hydrolase homolog 2	Nucleotide metabolism
RT1-SDT	4774	Pavir.Db00709.1	30260056	Pavir.Db00709.1.p|PACid:30260056	1.17425	2.25675530692625	<.0001	4	AT5G47650.1	nudix hydrolase homolog 2	Nucleotide metabolism
RT1-SDT	1875	Pavir.Fb00122.1	30279574	Pavir.Fb00122.1.p|PACid:30279574	-0.19595	0.87299784640927	0.0007	22	AT5G47840.1	adenosine monophosphate kinase	Nucleotide metabolism
RT1-SDT	2007	Pavir.Ca02621.1	30203950	Pavir.Ca02621.1.p|PACid:30203950	0.1788	1.13194197075616	0.4321	3	AT5G63310.1	nucleoside diphosphate kinase 2	Nucleotide metabolism
RT1-SDT	351	Pavir.Ca00410.1	30204010	Pavir.Ca00410.1.p|PACid:30204010	0.2021	1.15037162827224	0.1663	5	AT5G63400.1	adenylate kinase 1	Nucleotide metabolism
RT1-SDT	357	Pavir.Cb01805.1	30268747	Pavir.Cb01805.1.p|PACid:30268747	0.43503	1.35193894551588	<.0001	8	AT5G63400.1	adenylate kinase 1	Nucleotide metabolism
RT1-SDT	3907	Pavir.Ca00257.1	30206816	Pavir.Ca00257.1.p|PACid:30206816	-0.09291	0.937629587010094	0.4274	7	AT5G63980.1	Inositol monophosphatase family protein	Nucleotide metabolism
RT1-SDT	6316	Pavir.Cb01966.1	30270147	Pavir.Cb01966.1.p|PACid:30270147	-0.2398	0.846862704324513	0.1067	5	AT5G63980.1	Inositol monophosphatase family protein	Nucleotide metabolism
RT1-SDT	4424	Pavir.J10232.1	30208732	Pavir.J10232.1.p|PACid:30208732	0.6402	1.5585452045884	0.0004	3	AT5G64370.1	beta-ureidopropionase	Nucleotide metabolism
RT1-SDT	3799	Pavir.Ia03470.1	30214564	Pavir.Ia03470.1.p|PACid:30214564	0.31144	1.24094570953625	0.003	5	AT1G09420.1	glucose-6-phosphate dehydrogenase 4	Pentose phosphate pathway
RT1-SDT	1628	Pavir.Fa01933.1	30186872	Pavir.Fa01933.1.p|PACid:30186872	-0.04553	0.968933796267381	0.4756	16	AT1G12230.1	Aldolase superfamily protein	Pentose phosphate pathway
RT1-SDT	4844	Pavir.Fb00387.1	30278428	Pavir.Fb00387.1.p|PACid:30278428	-0.1122	0.925176162497657	0.5867	2	AT1G12230.1	Aldolase superfamily protein	Pentose phosphate pathway
RT1-SDT	6403	Pavir.Bb03286.1	30300208	Pavir.Bb03286.1.p|PACid:30300208	-0.03246	0.977751669866955	0.8035	3	AT1G13700.1	6-phosphogluconolactonase 1	Pentose phosphate pathway
RT1-SDT	889	Pavir.Bb00272.1	30296905	Pavir.Bb00272.1.p|PACid:30296905	-0.1731	0.886934825384093	0.0895	9	AT1G30510.2	root FNR 2	Pentose phosphate pathway
RT1-SDT	1031	Pavir.Ba03876.1	30292538	Pavir.Ba03876.1.p|PACid:30292538	0.09517	1.0681912709727	0.4701	3	AT1G30510.2	root FNR 2	Pentose phosphate pathway
RT1-SDT	1907	Pavir.J17479.1	30301949	Pavir.J17479.1.p|PACid:30301949	-0.2927	0.816372788450811	0.0092	7	AT1G71100.1	Ribose 5-phosphate isomerase, type A protein	Pentose phosphate pathway
RT1-SDT	3646	Pavir.Ia00209.1	30210701	Pavir.Ia00209.1.p|PACid:30210701	-1.533	0.345558051632146	0.0041	3	AT2G27510.1	ferredoxin 3	Pentose phosphate pathway
RT1-SDT	6704	Pavir.Gb01758.1	30222365	Pavir.Gb01758.1.p|PACid:30222365	-0.2494	0.841246206973442	0.2854	2	AT2G27510.1	ferredoxin 3	Pentose phosphate pathway
RT1-SDT	1376	Pavir.Ba01530.1	30290640	Pavir.Ba01530.1.p|PACid:30290640	0.42612	1.34361517984235	<.0001	27	AT3G01850.1	Aldolase-type TIM barrel family protein	Pentose phosphate pathway
RT1-SDT	142	Pavir.Db02438.1	30261934	Pavir.Db02438.1.p|PACid:30261934	0.50003	1.41424297042316	<.0001	6	AT3G02360.1	6-phosphogluconate dehydrogenase family protein	Pentose phosphate pathway
RT1-SDT	136	Pavir.Eb03856.1	30312061	Pavir.Eb03856.1.p|PACid:30312061	0.4077	1.3265692595916	<.0001	24	AT3G02360.1	6-phosphogluconate dehydrogenase family protein	Pentose phosphate pathway
RT1-SDT	2258	Pavir.J17430.1	30307472	Pavir.J17430.1.p|PACid:30307472	0.38494	1.30580547903645	<.0001	14	AT3G25530.1	glyoxylate reductase 1	Pentose phosphate pathway
RT1-SDT	2457	Pavir.Ia00500.1	30214711	Pavir.Ia00500.1.p|PACid:30214711	-0.09422	0.936778584384376	0.2484	12	AT4G05390.1	root FNR 1	Pentose phosphate pathway
RT1-SDT	6117	Pavir.Ca00941.1	30203299	Pavir.Ca00941.1.p|PACid:30203299	0.543	1.45699911389801	0.0006	3	AT4G29120.1	6-phosphogluconate dehydrogenase family protein	Pentose phosphate pathway
RT1-SDT	1238	Pavir.Eb01807.1	30310266	Pavir.Eb01807.1.p|PACid:30310266	0.2548	1.19317032303688	0.0772	4	AT5G13110.1	glucose-6-phosphate dehydrogenase 2	Pentose phosphate pathway
RT1-SDT	1006	Pavir.J07226.1	30191191	Pavir.J07226.1.p|PACid:30191191	0.4484	1.36452610940716	0.0003	4	AT5G13110.1	glucose-6-phosphate dehydrogenase 2	Pentose phosphate pathway
RT1-SDT	335	Pavir.Ea03881.1	30231562	Pavir.Ea03881.1.p|PACid:30231562	0.57403	1.48867621099624	<.0001	8	AT5G13420.1	Aldolase-type TIM barrel family protein	Pentose phosphate pathway
RT1-SDT	350	Pavir.J05681.1	30185183	Pavir.J05681.1.p|PACid:30185183	0.91344	1.88353128982966	<.0001	3	AT5G13420.1	Aldolase-type TIM barrel family protein	Pentose phosphate pathway
RT1-SDT	1866	Pavir.Ba01253.1	30293345	Pavir.Ba01253.1.p|PACid:30293345	0.2662	1.20263595808723	0.2613	2	AT5G24400.1	NagB/RpiA/CoA transferase-like superfamily protein	Pentose phosphate pathway
RT1-SDT	4631	Pavir.Fb02339.1	30280035	Pavir.Fb02339.1.p|PACid:30280035	0.1429	1.10412231258384	0.1648	5	AT5G24400.1	NagB/RpiA/CoA transferase-like superfamily protein	Pentose phosphate pathway
RT1-SDT	1012	Pavir.Ib00183.1	30240628	Pavir.Ib00183.1.p|PACid:30240628	0.71434	1.64073244831759	<.0001	23	AT5G24400.1	NagB/RpiA/CoA transferase-like superfamily protein	Pentose phosphate pathway
RT1-SDT	732	Pavir.Ga01565.1	30302903	Pavir.Ga01565.1.p|PACid:30302903	0.84784	1.79980424384023	<.0001	8	AT5G40760.1	glucose-6-phosphate dehydrogenase 6	Pentose phosphate pathway
RT1-SDT	1438	Pavir.J11001.1	30220412	Pavir.J11001.1.p|PACid:30220412	0.3957	1.3155809292201	<.0001	5	AT5G40760.1	glucose-6-phosphate dehydrogenase 6	Pentose phosphate pathway
RT1-SDT	206	Pavir.Hb00841.1	30264873	Pavir.Hb00841.1.p|PACid:30264873	0.3481	1.27288316175569	<.0001	102	AT5G41670.1	6-phosphogluconate dehydrogenase family protein	Pentose phosphate pathway
RT1-SDT	4760	Pavir.Ea00295.1	30226575	Pavir.Ea00295.1.p|PACid:30226575	2.15212	4.44480460769889	<.0001	10	AT1G03400.1	2-oxoglutarate (2OG) and Fe(II)-dependent oxygenase superfamily protein	Phyto-hormone metabolism
RT1-SDT	7373	Pavir.Ba02053.1	30291188	Pavir.Ba02053.1.p|PACid:30291188	-0.2268	0.854528195440775	0.249	2	AT1G05010.1	ethylene-forming enzyme	Phyto-hormone metabolism
RT1-SDT	4593	Pavir.Ib04510.1	30242432	Pavir.Ib04510.1.p|PACid:30242432	0.4838	1.39842220681834	0.0211	2	AT1G05180.1	NAD(P)-binding Rossmann-fold superfamily protein	Phyto-hormone metabolism
RT1-SDT	4198	Pavir.Ia00293.1	30214566	Pavir.Ia00293.1.p|PACid:30214566	0.26351	1.20039565331779	0.0038	4	AT1G05180.1	NAD(P)-binding Rossmann-fold superfamily protein	Phyto-hormone metabolism
RT1-SDT	1351	Pavir.J06690.1	30201894	Pavir.J06690.1.p|PACid:30201894	-0.03554	0.975666500960684	0.6494	12	AT1G05680.1	Uridine diphosphate glycosyltransferase 74E2	Phyto-hormone metabolism
RT1-SDT	1372	Pavir.J04199.1	30198046	Pavir.J04199.1.p|PACid:30198046	-1.101	0.466193243218416	0.003	2	AT1G05680.1	Uridine diphosphate glycosyltransferase 74E2	Phyto-hormone metabolism
RT1-SDT	5801	Pavir.J00542.1	30195347	Pavir.J00542.1.p|PACid:30195347	0.38653	1.30724540582924	0.0004	4	AT1G09740.1	Adenine nucleotide alpha hydrolases-like superfamily protein	Phyto-hormone metabolism
RT1-SDT	3019	Pavir.Ha01429.1	30317373	Pavir.Ha01429.1.p|PACid:30317373	-0.039	0.973329374158238	0.6267	14	AT1G11680.1	CYTOCHROME P450 51G1	Phyto-hormone metabolism
RT1-SDT	5661	Pavir.Ia04367.1	30212700	Pavir.Ia04367.1.p|PACid:30212700	0.1498	1.10941566373903	0.1691	4	AT1G17420.1	lipoxygenase 3	Phyto-hormone metabolism
RT1-SDT	1081	Pavir.Ia04449.1	30214861	Pavir.Ia04449.1.p|PACid:30214861	-0.19057	0.876259448158754	0.0016	27	AT1G20330.1	sterol methyltransferase 2	Phyto-hormone metabolism
RT1-SDT	1335	Pavir.Ib00338.1	30242341	Pavir.Ib00338.1.p|PACid:30242341	-0.16383	0.892652150960623	0.0032	26	AT1G20330.1	sterol methyltransferase 2	Phyto-hormone metabolism
RT1-SDT	5117	Pavir.Ab00936.1	30233359	Pavir.Ab00936.1.p|PACid:30233359	0.9571	1.94140350271186	<.0001	5	AT1G22400.1	UDP-Glycosyltransferase superfamily protein	Phyto-hormone metabolism
RT1-SDT	2299	Pavir.Bb03360.1	30299565	Pavir.Bb03360.1.p|PACid:30299565	0.57446	1.48911998196557	<.0001	17	AT1G28200.1	FH interacting protein 1	Phyto-hormone metabolism
RT1-SDT	2555	Pavir.Ga00328.1	30302749	Pavir.Ga00328.1.p|PACid:30302749	-0.05594	0.961967460934862	0.9188	3	AT1G44090.1	gibberellin 20-oxidase 5	Phyto-hormone metabolism
RT1-SDT	3602	Pavir.Da00043.1	30194456	Pavir.Da00043.1.p|PACid:30194456	-0.45396	0.730036245949288	<.0001	6	AT1G44350.1	IAA-leucine resistant (ILR)-like gene 6	Phyto-hormone metabolism
RT1-SDT	3345	Pavir.Da01931.1	30192827	Pavir.Da01931.1.p|PACid:30192827	1.1565	2.22915973567121	<.0001	6	AT1G45249.1	abscisic acid responsive elements-binding factor 2	Phyto-hormone metabolism
RT1-SDT	6093	Pavir.Fa00674.1	30188302	Pavir.Fa00674.1.p|PACid:30188302	1.17989	2.26559502101781	<.0001	4	AT1G45249.1	abscisic acid responsive elements-binding factor 2	Phyto-hormone metabolism
RT1-SDT	2425	Pavir.Aa00331.1	30249051	Pavir.Aa00331.1.p|PACid:30249051	0.80521	1.74740012647125	<.0001	9	AT1G48420.1	D-cysteine desulfhydrase	Phyto-hormone metabolism
RT1-SDT	1963	Pavir.Eb01571.1	30310891	Pavir.Eb01571.1.p|PACid:30310891	0.24569	1.18565970266632	<.0001	27	AT1G51760.1	peptidase M20/M25/M40 family protein	Phyto-hormone metabolism
RT1-SDT	4637	Pavir.Ea02566.1	30229779	Pavir.Ea02566.1.p|PACid:30229779	0.957	1.94126893953909	<.0001	3	AT1G51760.1	peptidase M20/M25/M40 family protein	Phyto-hormone metabolism
RT1-SDT	1639	Pavir.Ba00880.1	30292749	Pavir.Ba00880.1.p|PACid:30292749	0.02939	1.02058051283834	0.7861	15	AT1G52340.1	NAD(P)-binding Rossmann-fold superfamily protein	Phyto-hormone metabolism
RT1-SDT	418	Pavir.J01102.1	30275273	Pavir.J01102.1.p|PACid:30275273	0.72026	1.64747891357746	<.0001	15	AT1G52340.1	NAD(P)-binding Rossmann-fold superfamily protein	Phyto-hormone metabolism
RT1-SDT	437	Pavir.J15560.1	30197377	Pavir.J15560.1.p|PACid:30197377	0.35701	1.28076873891141	<.0001	6	AT1G52340.1	NAD(P)-binding Rossmann-fold superfamily protein	Phyto-hormone metabolism
RT1-SDT	6397	Pavir.Ca00988.1	30206468	Pavir.Ca00988.1.p|PACid:30206468	0.5007	1.41489990956893	0.0012	3	AT1G52820.1	2-oxoglutarate (2OG) and Fe(II)-dependent oxygenase superfamily protein	Phyto-hormone metabolism
RT1-SDT	1860	Pavir.Ha00910.1	30317703	Pavir.Ha00910.1.p|PACid:30317703	0.22174	1.16613919126596	0.0122	21	AT1G52820.1	2-oxoglutarate (2OG) and Fe(II)-dependent oxygenase superfamily protein	Phyto-hormone metabolism
RT1-SDT	5115	Pavir.Fa01685.1	30185914	Pavir.Fa01685.1.p|PACid:30185914	-0.2583	0.836072525442473	0.0604	2	AT1G52820.1	2-oxoglutarate (2OG) and Fe(II)-dependent oxygenase superfamily protein	Phyto-hormone metabolism
RT1-SDT	2393	Pavir.Ib04405.1	30240108	Pavir.Ib04405.1.p|PACid:30240108	1.9012	3.73523755764715	<.0001	3	AT1G55020.1	lipoxygenase 1	Phyto-hormone metabolism
RT1-SDT	6511	Pavir.Ib00988.1	30241744	Pavir.Ib00988.1.p|PACid:30241744	-0.1415	0.906576079154337	0.2509	4	AT1G58440.1	FAD/NAD(P)-binding oxidoreductase family protein	Phyto-hormone metabolism
[truncated: 3,645 more rows]

## Sheet: RT1-D1W
Treatment	pro_hit_num	pro_acc	pro_ID	pro_acc_ID	log2_fold	fold_change	p_value	num_pep	Funtion description at	at_acc	at_annota	Functional group at
RT1-D1W	9281	Pavir.Aa03204.1	30252735	Pavir.Aa03204.1.p|PACid:30252735	-0.18244	0.881211360884835	0.0637	3	stress.abiotic.drought / salt / development.unspecified	AT2G18250.1	4-phosphopantetheine adenylyltransferase	Abiotic/biotic stress
RT1-D1W	7046	Pavir.Bb00468.1	30298354	Pavir.Bb00468.1.p|PACid:30298354	1.0975	2.13983565780056	<.0001	6	stress.abiotic.drought / salt / development.unspecified	AT2G18250.1	4-phosphopantetheine adenylyltransferase	Abiotic/biotic stress
RT1-D1W	5892	Pavir.Bb02338.2	30299762	Pavir.Bb02338.2.p|PACid:30299762	0.178	1.1313144628459	0.1987	4	stress.abiotic / misc.oxidases - copper, flavone etc	AT1G49670.1	ARP protein (REF)	Abiotic/biotic stress
RT1-D1W	6858	Pavir.J00132.1	30254394	Pavir.J00132.1.p|PACid:30254394	0.5201	1.43405464566437	0.0003	4	stress.abiotic.light / protein.degradation.ubiquitin.E3.DCX	AT4G05420.1	damaged DNA binding protein 1A	Abiotic/biotic stress
RT1-D1W	9063	Pavir.J00582.1	30255742	Pavir.J00582.1.p|PACid:30255742	-0.49526	0.709433813646374	<.0001	2	stress.abiotic.heat / RNA.regulation of transcription.HSF,Heat-shock transcription factor family	AT2G26150.1	heat shock transcription factor A2	Abiotic/biotic stress
RT1-D1W	4420	Pavir.J12437.1	30200081	Pavir.J12437.1.p|PACid:30200081	-0.01151	0.992053616716743	0.9043	3	stress.abiotic.unspecified	AT1G01170.1	Protein of unknown function (DUF1138)	Abiotic/biotic stress
RT1-D1W	4936	Pavir.Da02382.1	30192014	Pavir.Da02382.1.p|PACid:30192014	-0.04059	0.972257254847046	0.8828	2	stress.abiotic.unspecified	AT1G01170.1	Protein of unknown function (DUF1138)	Abiotic/biotic stress
RT1-D1W	7601	Pavir.Ia00684.1	30214291	Pavir.Ia00684.1.p|PACid:30214291	-0.1616	0.89403300657983	0.2407	2	stress.abiotic.unspecified	AT1G01170.1	Protein of unknown function (DUF1138)	Abiotic/biotic stress
RT1-D1W	4902	Pavir.J22072.1	30218224	Pavir.J22072.1.p|PACid:30218224	0.50858	1.42264923671353	<.0001	7	stress.biotic	AT1G02360.1	Chitinase family protein	Abiotic/biotic stress
RT1-D1W	7720	Pavir.J23696.1	30294265	Pavir.J23696.1.p|PACid:30294265	0.3562	1.28004985413427	0.0189	3	stress.biotic	AT1G02360.1	Chitinase family protein	Abiotic/biotic stress
RT1-D1W	5671	Pavir.Ia01681.1	30215702	Pavir.Ia01681.1.p|PACid:30215702	-0.008157	0.99436195223321	0.9219	5	stress.abiotic.drought/salt	AT1G04430.1	S-adenosyl-L-methionine-dependent methyltransferases superfamily protein	Abiotic/biotic stress
RT1-D1W	1400	Pavir.Ab01492.1	30234021	Pavir.Ab01492.1.p|PACid:30234021	0.66683	1.58758077822716	<.0001	22	stress.abiotic.cold	AT1G05260.1	Peroxidase superfamily protein	Abiotic/biotic stress
RT1-D1W	1830	Pavir.Ca01295.1	30206146	Pavir.Ca01295.1.p|PACid:30206146	0.09365	1.06706643470432	0.2046	9	stress.abiotic.cold	AT1G05260.1	Peroxidase superfamily protein	Abiotic/biotic stress
RT1-D1W	1840	Pavir.Da00014.1	30193803	Pavir.Da00014.1.p|PACid:30193803	0.05295	1.03738398295344	0.3073	17	stress.abiotic.cold	AT1G05260.1	Peroxidase superfamily protein	Abiotic/biotic stress
RT1-D1W	1345	Pavir.Da01522.1	30193790	Pavir.Da01522.1.p|PACid:30193790	0.94965	1.93140403946566	<.0001	13	stress.abiotic.cold	AT1G05260.1	Peroxidase superfamily protein	Abiotic/biotic stress
RT1-D1W	1505	Pavir.Db00355.1	30260675	Pavir.Db00355.1.p|PACid:30260675	-0.17322	0.886861055287321	0.0002	21	stress.abiotic.cold	AT1G05260.1	Peroxidase superfamily protein	Abiotic/biotic stress
RT1-D1W	1955	Pavir.Db00918.1	30260144	Pavir.Db00918.1.p|PACid:30260144	1.2276	2.34177099563517	<.0001	2	stress.abiotic.cold	AT1G05260.1	Peroxidase superfamily protein	Abiotic/biotic stress
RT1-D1W	3847	Pavir.Ia02466.1	30212038	Pavir.Ia02466.1.p|PACid:30212038	0.09452	1.06771011042418	0.1693	11	stress.abiotic.cold	AT1G05260.1	Peroxidase superfamily protein	Abiotic/biotic stress
RT1-D1W	2458	Pavir.Ib02451.1	30237204	Pavir.Ib02451.1.p|PACid:30237204	-0.04244	0.97101130672759	0.4049	13	stress.abiotic.cold	AT1G05260.1	Peroxidase superfamily protein	Abiotic/biotic stress
RT1-D1W	2205	Pavir.J05455.1	30245217	Pavir.J05455.1.p|PACid:30245217	0.06536	1.04634600506096	0.5316	3	stress.abiotic.cold	AT1G05260.1	Peroxidase superfamily protein	Abiotic/biotic stress
RT1-D1W	260	Pavir.J37141.1	30259827	Pavir.J37141.1.p|PACid:30259827	0.60761	1.5237328679148	<.0001	8	stress.abiotic.cold	AT1G05260.1	Peroxidase superfamily protein	Abiotic/biotic stress
RT1-D1W	284	Pavir.Eb01214.1	30312155	Pavir.Eb01214.1.p|PACid:30312155	0.75343	1.68579604118662	<.0001	5	stress.abiotic.cold	AT1G05260.1	Peroxidase superfamily protein	Abiotic/biotic stress
RT1-D1W	4218	Pavir.Ib00143.1	30240020	Pavir.Ib00143.1.p|PACid:30240020	0.7734	1.70929333282849	<.0001	2	stress.abiotic.cold	AT1G05260.1	Peroxidase superfamily protein	Abiotic/biotic stress
RT1-D1W	5829	Pavir.J28488.1	30301888	Pavir.J28488.1.p|PACid:30301888	0.09051	1.06474650921358	0.3423	4	stress.abiotic.cold	AT1G05260.1	Peroxidase superfamily protein	Abiotic/biotic stress
RT1-D1W	4296	Pavir.J28940.1	30219908	Pavir.J28940.1.p|PACid:30219908	0.41907	1.33706536864762	<.0001	6	stress.biotic.respiratory burst	AT1G09090.2	respiratory burst oxidase homolog B	Abiotic/biotic stress
RT1-D1W	3111	Pavir.Ea00976.1	30226954	Pavir.Ea00976.1.p|PACid:30226954	0.19089	1.14146767124796	0.0223	8	stress.abiotic.unspecified	AT1G09560.1	germin-like protein 5	Abiotic/biotic stress
RT1-D1W	1902	Pavir.Ea01055.1	30230917	Pavir.Ea01055.1.p|PACid:30230917	0.54533	1.45935411663857	<.0001	34	stress.abiotic.unspecified	AT1G09560.1	germin-like protein 5	Abiotic/biotic stress
RT1-D1W	2470	Pavir.Eb00788.1	30308756	Pavir.Eb00788.1.p|PACid:30308756	0.44918	1.36526404646571	<.0001	9	stress.abiotic.unspecified	AT1G09560.1	germin-like protein 5	Abiotic/biotic stress
RT1-D1W	486	Pavir.Ea03104.1	30230363	Pavir.Ea03104.1.p|PACid:30230363	0.3023	1.23310871655443	0.0163	9	stress.abiotic.unspecified	AT1G11360.1	Adenine nucleotide alpha hydrolases-like superfamily protein	Abiotic/biotic stress
RT1-D1W	1617	Pavir.J34065.1	30207993	Pavir.J34065.1.p|PACid:30207993	-0.2834	0.821652345308084	0.0644	3	stress.abiotic.unspecified	AT1G11360.1	Adenine nucleotide alpha hydrolases-like superfamily protein	Abiotic/biotic stress
RT1-D1W	1344	Pavir.J37634.1	30247346	Pavir.J37634.1.p|PACid:30247346	-0.1749	0.885828917956108	0.1227	10	stress.abiotic.unspecified	AT1G11360.1	Adenine nucleotide alpha hydrolases-like superfamily protein	Abiotic/biotic stress
RT1-D1W	8947	Pavir.Da00081.1	30192831	Pavir.Da00081.1.p|PACid:30192831	0.2954	1.22722518916015	0.026	2	stress.abiotic.heat	AT1G11660.1	heat shock protein 70 (Hsp 70) family protein	Abiotic/biotic stress
RT1-D1W	7399	Pavir.Da00035.1	30193652	Pavir.Da00035.1.p|PACid:30193652	0.1559	1.11411642347709	0.1572	2	stress.abiotic.heat	AT1G11660.1	heat shock protein 70 (Hsp 70) family protein	Abiotic/biotic stress
RT1-D1W	1503	Pavir.J13939.1	30244820	Pavir.J13939.1.p|PACid:30244820	0.79436	1.73430784005128	<.0001	69	stress.abiotic.unspecified	AT1G18970.1	germin-like protein 4	Abiotic/biotic stress
RT1-D1W	4458	Pavir.J17443.1	30185405	Pavir.J17443.1.p|PACid:30185405	0.788	1.72667911714882	<.0001	3	stress.abiotic.unspecified	AT1G18970.1	germin-like protein 4	Abiotic/biotic stress
RT1-D1W	7274	Pavir.Ib01907.1	30237795	Pavir.Ib01907.1.p|PACid:30237795	0.5043	1.41843496027253	0.0018	4	stress.biotic.PR-proteins.proteinase inhibitors.trypsin inhibitor	AT1G19110.1	inter-alpha-trypsin inhibitor heavy chain-related	Abiotic/biotic stress
RT1-D1W	3890	Pavir.Da01414.1	30193093	Pavir.Da01414.1.p|PACid:30193093	-0.40039	0.757653441084074	<.0001	14	stress.biotic	AT1G20030.2	Pathogenesis-related thaumatin superfamily protein	Abiotic/biotic stress
RT1-D1W	423	Pavir.Aa00887.1	30253439	Pavir.Aa00887.1.p|PACid:30253439	-0.0164	0.988696753428805	0.6972	75	stress.abiotic.unspecified	AT1G20450.1	Dehydrin family protein	Abiotic/biotic stress
RT1-D1W	349	Pavir.J04551.1	30285341	Pavir.J04551.1.p|PACid:30285341	-0.36891	0.774367333894539	<.0001	99	stress.abiotic.unspecified	AT1G20450.1	Dehydrin family protein	Abiotic/biotic stress
RT1-D1W	5782	Pavir.Cb01081.1	30268414	Pavir.Cb01081.1.p|PACid:30268414	0.6269	1.54424322369014	0.0002	4	stress.biotic	AT1G20780.1	senescence-associated E3 ubiquitin ligase 1	Abiotic/biotic stress
RT1-D1W	6270	Pavir.Ba01678.1	30290473	Pavir.Ba01678.1.p|PACid:30290473	0.18	1.1328838852958	0.3143	6	stress.abiotic.heat	AT1G21080.1	DNAJ heat shock N-terminal domain-containing protein	Abiotic/biotic stress
RT1-D1W	1961	Pavir.Fa00465.1	30188408	Pavir.Fa00465.1.p|PACid:30188408	0.03398	1.02383270699498	0.616	12	stress.abiotic.heat	AT1G21080.1	DNAJ heat shock N-terminal domain-containing protein	Abiotic/biotic stress
RT1-D1W	3897	Pavir.J04930.1	30272970	Pavir.J04930.1.p|PACid:30272970	0.04531	1.03190488668922	0.6837	10	stress.abiotic.touch/wounding	AT1G21610.2	wound-responsive family protein	Abiotic/biotic stress
RT1-D1W	6692	Pavir.J18909.1	30200331	Pavir.J18909.1.p|PACid:30200331	-0.1764	0.884908381863872	0.2871	2	stress.abiotic.touch/wounding	AT1G21610.2	wound-responsive family protein	Abiotic/biotic stress
RT1-D1W	8243	Pavir.J40690.1	30288057	Pavir.J40690.1.p|PACid:30288057	-0.5084	0.70300165948604	0.0695	4	stress.biotic	AT1G22900.1	Disease resistance-responsive (dirigent-like protein) family protein	Abiotic/biotic stress
RT1-D1W	5877	Pavir.J36222.1	30244386	Pavir.J36222.1.p|PACid:30244386	0.006124	1.00425385539997	0.9385	7	stress.abiotic.heat	AT1G24120.1	ARG1-like 1	Abiotic/biotic stress
RT1-D1W	6949	Pavir.Db01839.1	30261826	Pavir.Db01839.1.p|PACid:30261826	0.41936	1.33733416275847	<.0001	5	stress.abiotic.heat	AT1G28210.2	DNAJ heat shock family protein	Abiotic/biotic stress
RT1-D1W	4122	Pavir.Ea02647.1	30227921	Pavir.Ea02647.1.p|PACid:30227921	0.31339	1.24262415174161	<.0001	11	stress.abiotic.unspecified	AT1G28290.1	arabinogalactan protein 31	Abiotic/biotic stress
RT1-D1W	6397	Pavir.Eb02971.1	30310765	Pavir.Eb02971.1.p|PACid:30310765	0.5254	1.43933259242473	<.0001	7	stress.abiotic.unspecified	AT1G28290.1	arabinogalactan protein 31	Abiotic/biotic stress
RT1-D1W	8624	Pavir.Ca01524.1	30203077	Pavir.Ca01524.1.p|PACid:30203077	1.2896	2.44460267363379	<.0001	2	stress.abiotic.unspecified	AT1G28290.1	arabinogalactan protein 31	Abiotic/biotic stress
RT1-D1W	7081	Pavir.J35962.1	30296188	Pavir.J35962.1.p|PACid:30296188	1.276	2.42166616790111	<.0001	6	stress.abiotic.drought/salt	AT1G30360.1	Early-responsive to dehydration stress protein (ERD4)	Abiotic/biotic stress
RT1-D1W	3431	Pavir.J39028.1	30247314	Pavir.J39028.1.p|PACid:30247314	0.06191	1.04384680683812	0.7823	2	stress.abiotic.drought/salt	AT1G33170.1	S-adenosyl-L-methionine-dependent methyltransferases superfamily protein	Abiotic/biotic stress
RT1-D1W	6875	Pavir.J33826.1	30315418	Pavir.J33826.1.p|PACid:30315418	0.7809	1.71820240905115	<.0001	5	stress.abiotic.drought/salt	AT1G34130.1	staurosporin and temperature sensitive 3-like b	Abiotic/biotic stress
RT1-D1W	2026	Pavir.Ab00731.1	30236320	Pavir.Ab00731.1.p|PACid:30236320	2.0154	4.0429265678272	<.0001	24	stress.abiotic.heat	AT1G52560.1	HSP20-like chaperones superfamily protein	Abiotic/biotic stress
RT1-D1W	549	Pavir.Aa00282.1	30253178	Pavir.Aa00282.1.p|PACid:30253178	2.4821	5.58710138480544	<.0001	5	stress.abiotic.heat	AT1G54050.1	HSP20-like chaperones superfamily protein	Abiotic/biotic stress
RT1-D1W	648	Pavir.J21349.1	30225604	Pavir.J21349.1.p|PACid:30225604	2.1836	4.54285733701831	<.0001	8	stress.abiotic.heat	AT1G54050.1	HSP20-like chaperones superfamily protein	Abiotic/biotic stress
RT1-D1W	9739	Pavir.Ha01146.1	30318265	Pavir.Ha01146.1.p|PACid:30318265	0.02412	1.01685924974911	0.8468	2	stress.biotic.PR-proteins	AT1G58390.1	Disease resistance protein (CC-NBS-LRR class) family	Abiotic/biotic stress
RT1-D1W	4063	Pavir.Ca00229.1	30204212	Pavir.Ca00229.1.p|PACid:30204212	0.59234	1.50769018510116	<.0001	11	stress.biotic.PR-proteins	AT1G65870.1	Disease resistance-responsive (dirigent-like protein) family protein	Abiotic/biotic stress
RT1-D1W	5594	Pavir.Ha00864.1	30316333	Pavir.Ha00864.1.p|PACid:30316333	1.0086	2.01195773652333	<.0001	7	stress.biotic.PR-proteins	AT1G65870.1	Disease resistance-responsive (dirigent-like protein) family protein	Abiotic/biotic stress
RT1-D1W	5449	Pavir.J15815.1	30202491	Pavir.J15815.1.p|PACid:30202491	0.1876	1.13886757230557	0.1166	9	stress.biotic.PR-proteins	AT1G65870.1	Disease resistance-responsive (dirigent-like protein) family protein	Abiotic/biotic stress
RT1-D1W	8232	Pavir.Hb01571.1	30264315	Pavir.Hb01571.1.p|PACid:30264315	1.9912	3.97567548073954	<.0001	7	stress.biotic	AT1G66100.1	Plant thionin	Abiotic/biotic stress
RT1-D1W	5942	Pavir.Ib02577.1	30239592	Pavir.Ib02577.1.p|PACid:30239592	1.2098	2.31305568797754	<.0001	12	stress.biotic	AT1G66100.1	Plant thionin	Abiotic/biotic stress
RT1-D1W	4534	Pavir.Fb01262.1	30280025	Pavir.Fb01262.1.p|PACid:30280025	1.2782	2.42536184136354	<.0001	7	stress.abiotic.unspecified	AT1G68300.1	Adenine nucleotide alpha hydrolases-like superfamily protein	Abiotic/biotic stress
RT1-D1W	4059	Pavir.Fa01006.1	30188438	Pavir.Fa01006.1.p|PACid:30188438	1.113	2.16294952696724	<.0001	8	stress.abiotic.unspecified	AT1G68300.1	Adenine nucleotide alpha hydrolases-like superfamily protein	Abiotic/biotic stress
RT1-D1W	122	Pavir.Cb00592.1	30270091	Pavir.Cb00592.1.p|PACid:30270091	0.24434	1.18455074208344	<.0001	32	stress.abiotic.unspecified	AT1G70840.1	MLP-like protein 31	Abiotic/biotic stress
RT1-D1W	692	Pavir.J14856.1	30285131	Pavir.J14856.1.p|PACid:30285131	0.27849	1.21292470942798	<.0001	42	stress.abiotic.unspecified	AT1G70840.1	MLP-like protein 31	Abiotic/biotic stress
RT1-D1W	1080	Pavir.Ca02304.1	30205601	Pavir.Ca02304.1.p|PACid:30205601	-0.09329	0.937382651716631	0.2876	8	stress.abiotic.unspecified	AT1G70840.1	MLP-like protein 31	Abiotic/biotic stress
RT1-D1W	274	Pavir.J27771.1	30219066	Pavir.J27771.1.p|PACid:30219066	-0.9839	0.505611085500906	<.0001	7	stress.abiotic.unspecified	AT1G70840.1	MLP-like protein 31	Abiotic/biotic stress
RT1-D1W	333	Pavir.J31266.1	30315516	Pavir.J31266.1.p|PACid:30315516	0.005291	1.00367417502558	0.9849	4	stress.abiotic.unspecified	AT1G70840.1	MLP-like protein 31	Abiotic/biotic stress
RT1-D1W	5192	Pavir.Db00301.1	30261633	Pavir.Db00301.1.p|PACid:30261633	0.0864	1.06171753875255	0.3749	7	stress.biotic	AT1G73620.1	Pathogenesis-related thaumatin superfamily protein	Abiotic/biotic stress
RT1-D1W	6028	Pavir.J25074.1	30216220	Pavir.J25074.1.p|PACid:30216220	0.1621	1.11891465560173	0.1449	4	stress.biotic	AT1G73620.1	Pathogenesis-related thaumatin superfamily protein	Abiotic/biotic stress
RT1-D1W	921	Pavir.J02395.1	30315736	Pavir.J02395.1.p|PACid:30315736	1.7344	3.3274108197896	<.0001	5	stress.abiotic.heat	AT1G74310.1	heat shock protein 101	Abiotic/biotic stress
RT1-D1W	1323	Pavir.J37362.1	30294839	Pavir.J37362.1.p|PACid:30294839	2.4354	5.40914285707285	<.0001	7	stress.abiotic.heat	AT1G74310.1	heat shock protein 101	Abiotic/biotic stress
RT1-D1W	345	Pavir.J40704.1	30246796	Pavir.J40704.1.p|PACid:30246796	1.6632	3.16718249777658	<.0001	5	stress.abiotic.heat	AT1G74310.1	heat shock protein 101	Abiotic/biotic stress
RT1-D1W	5409	Pavir.Eb03026.1	30309417	Pavir.Eb03026.1.p|PACid:30309417	0.2132	1.15925664786101	0.3758	8	stress.biotic	AT1G78780.2	pathogenesis-related family protein	Abiotic/biotic stress
RT1-D1W	364	Pavir.Ca01047.1	30205606	Pavir.Ca01047.1.p|PACid:30205606	0.32406	1.25184852048774	<.0001	15	stress.abiotic.heat	AT1G79920.1	Heat shock protein 70 (Hsp 70) family protein	Abiotic/biotic stress
RT1-D1W	379	Pavir.Ib02877.1	30238824	Pavir.Ib02877.1.p|PACid:30238824	0.18781	1.13903335896913	0.0005	24	stress.abiotic.heat	AT1G79920.1	Heat shock protein 70 (Hsp 70) family protein	Abiotic/biotic stress
RT1-D1W	353	Pavir.J02507.1	30248656	Pavir.J02507.1.p|PACid:30248656	0.5803	1.49516012611901	0.0002	8	stress.abiotic.heat	AT1G79920.1	Heat shock protein 70 (Hsp 70) family protein	Abiotic/biotic stress
RT1-D1W	328	Pavir.J04576.1	30281447	Pavir.J04576.1.p|PACid:30281447	0.12675	1.09183132939987	0.0493	16	stress.abiotic.heat	AT1G79920.1	Heat shock protein 70 (Hsp 70) family protein	Abiotic/biotic stress
RT1-D1W	8706	Pavir.Ga02243.1	30303480	Pavir.Ga02243.1.p|PACid:30303480	0.6795	1.60158459206016	0.0027	2	stress.abiotic.heat	AT1G79940.1	DnaJ / Sec63 Brl domains-containing protein	Abiotic/biotic stress
RT1-D1W	2636	Pavir.J06096.1	30189892	Pavir.J06096.1.p|PACid:30189892	0.45544	1.37120093660238	0.0009	2	stress.abiotic.heat	AT2G01710.1	Chaperone DnaJ-domain superfamily protein	Abiotic/biotic stress
RT1-D1W	6153	Pavir.Ba01986.1	30293518	Pavir.Ba01986.1.p|PACid:30293518	0.47088	1.38595460039306	0.0005	2	stress.abiotic.heat	AT2G01710.1	Chaperone DnaJ-domain superfamily protein	Abiotic/biotic stress
RT1-D1W	6376	Pavir.Ga01235.1	30303800	Pavir.Ga01235.1.p|PACid:30303800	0.67666	1.5984349130905	<.0001	3	stress.biotic	AT2G02120.1	Scorpion toxin-like knottin superfamily protein	Abiotic/biotic stress
RT1-D1W	6631	Pavir.J20852.1	30208603	Pavir.J20852.1.p|PACid:30208603	0.31445	1.24353748794393	0.0036	3	stress.biotic	AT2G02120.1	Scorpion toxin-like knottin superfamily protein	Abiotic/biotic stress
RT1-D1W	1062	Pavir.Fa00597.1	30188120	Pavir.Fa00597.1.p|PACid:30188120	0.05813	1.0411154074647	0.5058	16	stress.abiotic.heat	AT2G04030.1	Chaperone protein htpG family protein	Abiotic/biotic stress
RT1-D1W	6231	Pavir.J38392.1	30207790	Pavir.J38392.1.p|PACid:30207790	2.6192	6.14409277188855	0.0002	2	stress.biotic	AT2G14610.1	pathogenesis-related gene 1	Abiotic/biotic stress
RT1-D1W	4775	Pavir.Ib03654.1	30243014	Pavir.Ib03654.1.p|PACid:30243014	1.3095	2.47855624886917	<.0001	4	stress.biotic	AT2G15220.1	Plant basic secretory protein (BSP) family protein	Abiotic/biotic stress
RT1-D1W	3756	Pavir.Ia01601.1	30209916	Pavir.Ia01601.1.p|PACid:30209916	0.77304	1.70886686097251	<.0001	8	stress.biotic	AT2G15220.1	Plant basic secretory protein (BSP) family protein	Abiotic/biotic stress
RT1-D1W	5035	Pavir.Aa02396.1	30249552	Pavir.Aa02396.1.p|PACid:30249552	-0.10861	0.927481236141291	0.2492	10	stress.abiotic.heat	AT2G20560.1	DNAJ heat shock family protein	Abiotic/biotic stress
RT1-D1W	1764	Pavir.Ea00013.1	30229906	Pavir.Ea00013.1.p|PACid:30229906	0.6159	1.53251373076903	<.0001	5	stress.abiotic.heat	AT2G20560.1	DNAJ heat shock family protein	Abiotic/biotic stress
RT1-D1W	1659	Pavir.Eb00064.1	30313172	Pavir.Eb00064.1.p|PACid:30313172	0.43806	1.35478132008489	<.0001	8	stress.abiotic.heat	AT2G20560.1	DNAJ heat shock family protein	Abiotic/biotic stress
RT1-D1W	966	Pavir.J33423.1	30208153	Pavir.J33423.1.p|PACid:30208153	0.52424	1.43817576114171	<.0001	51	stress.abiotic.heat	AT2G20560.1	DNAJ heat shock family protein	Abiotic/biotic stress
RT1-D1W	5504	Pavir.Eb02336.1	30308702	Pavir.Eb02336.1.p|PACid:30308702	0.8535	1.80687912838784	<.0001	3	stress.biotic.PR-proteins	AT2G21100.1	Disease resistance-responsive (dirigent-like protein) family protein	Abiotic/biotic stress
RT1-D1W	9503	Pavir.Ea02542.1	30227863	Pavir.Ea02542.1.p|PACid:30227863	2.3499	5.09788913828198	0.025	2	stress.abiotic.unspecified	AT2G21490.1	dehydrin LEA	Abiotic/biotic stress
RT1-D1W	5065	Pavir.Ab02861.1	30234236	Pavir.Ab02861.1.p|PACid:30234236	0.5077	1.4217817286467	0.0013	3	stress.abiotic.unspecified	AT2G21620.1	Adenine nucleotide alpha hydrolases-like superfamily protein	Abiotic/biotic stress
RT1-D1W	2289	Pavir.Fa01957.1	30187335	Pavir.Fa01957.1.p|PACid:30187335	0.1822	1.13461276476168	0.0002	19	stress.abiotic.heat	AT2G22360.1	DNAJ heat shock family protein	Abiotic/biotic stress
RT1-D1W	8774	Pavir.Fa00419.1	30186028	Pavir.Fa00419.1.p|PACid:30186028	-0.07742	0.947751013966747	0.8036	2	stress.abiotic	AT2G24550.1	N	Abiotic/biotic stress
RT1-D1W	866	Pavir.Aa03150.1	30253492	Pavir.Aa03150.1.p|PACid:30253492	1.2175	2.32543400940824	<.0001	7	stress.abiotic.heat	AT2G25140.1	casein lytic proteinase B4	Abiotic/biotic stress
RT1-D1W	1090	Pavir.Ab00567.1	30233121	Pavir.Ab00567.1.p|PACid:30233121	1.1069	2.15382345554636	<.0001	2	stress.abiotic.heat	AT2G25140.1	casein lytic proteinase B4	Abiotic/biotic stress
RT1-D1W	2942	Pavir.Ab00822.1	30234325	Pavir.Ab00822.1.p|PACid:30234325	-0.20875	0.865286620339506	0.0044	14	stress.abiotic.unspecified	AT2G26040.1	PYR1-like 2	Abiotic/biotic stress
RT1-D1W	6049	Pavir.Ia03513.1	30211414	Pavir.Ia03513.1.p|PACid:30211414	1.6036	3.03900700432953	<.0001	5	stress.abiotic.heat	AT2G26890.1	DNAJ heat shock N-terminal domain-containing protein	Abiotic/biotic stress
RT1-D1W	3109	Pavir.Cb00512.1	30268195	Pavir.Cb00512.1.p|PACid:30268195	1.49831	2.82511579207849	<.0001	17	stress.abiotic	AT2G28790.1	Pathogenesis-related thaumatin superfamily protein	Abiotic/biotic stress
RT1-D1W	6205	Pavir.Cb00575.1	30268257	Pavir.Cb00575.1.p|PACid:30268257	1.03019	2.04229319956093	<.0001	10	stress.abiotic	AT2G28790.1	Pathogenesis-related thaumatin superfamily protein	Abiotic/biotic stress
RT1-D1W	1882	Pavir.J31129.1	30225767	Pavir.J31129.1.p|PACid:30225767	1.41777	2.671722186585	<.0001	20	stress.abiotic	AT2G28790.1	Pathogenesis-related thaumatin superfamily protein	Abiotic/biotic stress
RT1-D1W	2544	Pavir.J38942.1	30276533	Pavir.J38942.1.p|PACid:30276533	1.5564	2.94119003077117	<.0001	24	stress.abiotic.heat	AT2G32120.1	heat-shock protein 70T-2	Abiotic/biotic stress
RT1-D1W	5921	Pavir.J05128.1	30287474	Pavir.J05128.1.p|PACid:30287474	0.3741	1.29603079632924	0.0469	2	stress.abiotic.unspecified	AT2G34700.1	Pollen Ole e 1 allergen and extensin family protein	Abiotic/biotic stress
RT1-D1W	5990	Pavir.Ca01526.1	30206088	Pavir.Ca01526.1.p|PACid:30206088	0.4327	1.34975728180215	0.0104	2	stress.abiotic.unspecified	AT2G34700.1	Pollen Ole e 1 allergen and extensin family protein	Abiotic/biotic stress
RT1-D1W	3720	Pavir.Ib03704.1	30240467	Pavir.Ib03704.1.p|PACid:30240467	0.31447	1.2435547271535	<.0001	10	stress.abiotic.heat	AT2G35720.1	DNAJ heat shock N-terminal domain-containing protein	Abiotic/biotic stress
RT1-D1W	959	Pavir.Ia03032.1	30213777	Pavir.Ia03032.1.p|PACid:30213777	0.13401	1.09733954373099	0.0008	38	stress.biotic	AT2G36800.1	don-glucosyltransferase 1	Abiotic/biotic stress
RT1-D1W	2349	Pavir.J26521.1	30274703	Pavir.J26521.1.p|PACid:30274703	0.38627	1.30700983755522	<.0001	12	stress.biotic	AT2G36800.1	don-glucosyltransferase 1	Abiotic/biotic stress
RT1-D1W	4353	Pavir.Ea00341.1	30226369	Pavir.Ea00341.1.p|PACid:30226369	0.167	1.12272142207361	0.3073	2	stress.biotic	AT2G36800.1	don-glucosyltransferase 1	Abiotic/biotic stress
RT1-D1W	798	Pavir.Ca00608.1	30204384	Pavir.Ca00608.1.p|PACid:30204384	1.38498	2.61168336830761	<.0001	29	stress.biotic	AT2G38870.1	Serine protease inhibitor, potato inhibitor I-type family protein	Abiotic/biotic stress
RT1-D1W	1130	Pavir.Ca00609.1	30204579	Pavir.Ca00609.1.p|PACid:30204579	1.2987	2.46007107891122	<.0001	17	stress.biotic	AT2G38870.1	Serine protease inhibitor, potato inhibitor I-type family protein	Abiotic/biotic stress
RT1-D1W	1356	Pavir.J00406.1	30195439	Pavir.J00406.1.p|PACid:30195439	1.11262	2.16237988989137	<.0001	13	stress.biotic	AT2G38870.1	Serine protease inhibitor, potato inhibitor I-type family protein	Abiotic/biotic stress
RT1-D1W	2474	Pavir.Ib01400.1	30239621	Pavir.Ib01400.1.p|PACid:30239621	1.0293	2.04103369539746	<.0001	7	stress.abiotic.unspecified	AT2G40330.1	PYR1-like 6	Abiotic/biotic stress
RT1-D1W	3635	Pavir.Bb03589.1	30299370	Pavir.Bb03589.1.p|PACid:30299370	-0.08167	0.94496316580108	0.4044	15	stress.abiotic.drought/salt	AT2G41430.1	dehydration-induced protein (ERD15)	Abiotic/biotic stress
RT1-D1W	6318	Pavir.Ca01575.1	30204737	Pavir.Ca01575.1.p|PACid:30204737	-0.315	0.803850990743151	0.1063	6	stress.abiotic.drought/salt	AT2G41430.1	dehydration-induced protein (ERD15)	Abiotic/biotic stress
RT1-D1W	7638	Pavir.Ga02741.1	30304197	Pavir.Ga02741.1.p|PACid:30304197	0.4595	1.37506517427411	0.1131	4	stress.biotic	AT2G43610.1	Chitinase family protein	Abiotic/biotic stress
RT1-D1W	4788	Pavir.Ca02660.1	30206509	Pavir.Ca02660.1.p|PACid:30206509	1.9252	3.79789494734452	<.0001	3	stress.abiotic.unspecified	AT2G47710.1	Adenine nucleotide alpha hydrolases-like superfamily protein	Abiotic/biotic stress
RT1-D1W	4117	Pavir.Cb00604.1	30269483	Pavir.Cb00604.1.p|PACid:30269483	1.0351	2.04925568472287	<.0001	10	stress.abiotic.unspecified	AT2G47710.1	Adenine nucleotide alpha hydrolases-like superfamily protein	Abiotic/biotic stress
RT1-D1W	5607	Pavir.Hb01667.1	30264710	Pavir.Hb01667.1.p|PACid:30264710	0.82116	1.76682603937574	<.0001	5	stress.abiotic	AT3G01420.1	Peroxidase superfamily protein	Abiotic/biotic stress
RT1-D1W	3986	Pavir.J34849.1	30255001	Pavir.J34849.1.p|PACid:30255001	2.3603	5.13477122490279	<.0001	13	stress.biotic	AT3G04720.1	pathogenesis-related 4	Abiotic/biotic stress
RT1-D1W	7710	Pavir.J36772.1	30203019	Pavir.J36772.1.p|PACid:30203019	2.8582	7.25110065246027	<.0001	8	stress.biotic	AT3G04720.1	pathogenesis-related 4	Abiotic/biotic stress
RT1-D1W	7163	Pavir.Ca00920.1	30205623	Pavir.Ca00920.1.p|PACid:30205623	0.57195	1.48653146428358	<.0001	3	stress.abiotic.drought/salt	AT3G05700.1	Drought-responsive family protein	Abiotic/biotic stress
RT1-D1W	4654	Pavir.J10983.1	30272879	Pavir.J10983.1.p|PACid:30272879	0.69997	1.62447101243619	<.0001	6	stress.abiotic.drought/salt	AT3G05700.1	Drought-responsive family protein	Abiotic/biotic stress
RT1-D1W	5736	Pavir.J03411.1	30243184	Pavir.J03411.1.p|PACid:30243184	0.984	1.97794183276186	<.0001	8	stress.abiotic.touch/wounding	AT3G07230.1	wound-responsive protein-related	Abiotic/biotic stress
RT1-D1W	588	Pavir.Ca02374.1	30206832	Pavir.Ca02374.1.p|PACid:30206832	-0.10827	0.927699841440949	0.0044	33	stress.abiotic.heat	AT3G07770.1	HEAT SHOCK PROTEIN 89.1	Abiotic/biotic stress
RT1-D1W	1200	Pavir.J07429.1	30275692	Pavir.J07429.1.p|PACid:30275692	-0.1853	0.879466177056412	0.2877	3	stress.abiotic.heat	AT3G07770.1	HEAT SHOCK PROTEIN 89.1	Abiotic/biotic stress
RT1-D1W	6636	Pavir.J34611.1	30277524	Pavir.J34611.1.p|PACid:30277524	-0.1745	0.886074555933964	0.2196	2	stress.abiotic.heat	AT3G08910.1	DNAJ heat shock family protein	Abiotic/biotic stress
RT1-D1W	5148	Pavir.Ib02444.1	30240674	Pavir.Ib02444.1.p|PACid:30240674	-0.11732	0.921898611577511	0.081	11	stress.abiotic.unspecified	AT3G09925.1	Pollen Ole e 1 allergen and extensin family protein	Abiotic/biotic stress
RT1-D1W	2254	Pavir.Aa01968.1	30252900	Pavir.Aa01968.1.p|PACid:30252900	0.4045	1.323630095659	0.1578	2	stress.abiotic.unspecified	AT3G10080.1	RmlC-like cupins superfamily protein	Abiotic/biotic stress
RT1-D1W	1913	Pavir.Ab01805.1	30232301	Pavir.Ab01805.1.p|PACid:30232301	0.0011	1.00076275264658	0.9907	4	stress.abiotic.unspecified	AT3G10080.1	RmlC-like cupins superfamily protein	Abiotic/biotic stress
RT1-D1W	3126	Pavir.J04721.1	30236724	Pavir.J04721.1.p|PACid:30236724	0.19228	1.14256797630707	0.0122	16	stress.abiotic.heat	AT3G12170.1	Chaperone DnaJ-domain superfamily protein	Abiotic/biotic stress
RT1-D1W	2162	Pavir.Ia04457.1	30209221	Pavir.Ia04457.1.p|PACid:30209221	2.39	5.24157361543345	<.0001	12	stress.biotic	AT3G12500.1	basic chitinase	Abiotic/biotic stress
RT1-D1W	2344	Pavir.Ib00193.1	30238328	Pavir.Ib00193.1.p|PACid:30238328	2.3939	5.25576219429679	<.0001	17	stress.biotic	AT3G12500.1	basic chitinase	Abiotic/biotic stress
RT1-D1W	3503	Pavir.J01684.1	30190681	Pavir.J01684.1.p|PACid:30190681	1.295	2.45376995450761	<.0001	7	stress.biotic	AT3G12500.1	basic chitinase	Abiotic/biotic stress
RT1-D1W	4243	Pavir.J04987.1	30196621	Pavir.J04987.1.p|PACid:30196621	1.2415	2.36444240517807	<.0001	6	stress.biotic	AT3G12500.1	basic chitinase	Abiotic/biotic stress
RT1-D1W	4992	Pavir.J08192.1	30281565	Pavir.J08192.1.p|PACid:30281565	1.4579	2.74708204704231	<.0001	5	stress.biotic	AT3G12500.1	basic chitinase	Abiotic/biotic stress
RT1-D1W	3247	Pavir.J08876.1	30275693	Pavir.J08876.1.p|PACid:30275693	3.0901	8.51555169223538	<.0001	12	stress.biotic	AT3G12500.1	basic chitinase	Abiotic/biotic stress
RT1-D1W	1280	Pavir.J34564.1	30263851	Pavir.J34564.1.p|PACid:30263851	2.4493	5.46151044263836	<.0001	22	stress.biotic	AT3G12500.1	basic chitinase	Abiotic/biotic stress
RT1-D1W	27	Pavir.Cb00504.1	30269945	Pavir.Cb00504.1.p|PACid:30269945	-0.1346	0.910922359888969	0.0442	38	stress.abiotic.heat	AT3G12580.1	heat shock protein 70	Abiotic/biotic stress
RT1-D1W	41	Pavir.Eb03667.1	30309961	Pavir.Eb03667.1.p|PACid:30309961	1.4667	2.76388961860771	<.0001	13	stress.abiotic.heat	AT3G12580.1	heat shock protein 70	Abiotic/biotic stress
RT1-D1W	3305	Pavir.Ib01261.1	30240566	Pavir.Ib01261.1.p|PACid:30240566	0.4353	1.35219198421367	<.0001	6	stress.abiotic.heat	AT3G12580.1	heat shock protein 70	Abiotic/biotic stress
RT1-D1W	37	Pavir.Ib01258.1	30237909	Pavir.Ib01258.1.p|PACid:30237909	0.05903	1.04176509167907	0.8537	5	stress.abiotic.heat	AT3G12580.1	heat shock protein 70	Abiotic/biotic stress
RT1-D1W	44	Pavir.J02847.1	30218796	Pavir.J02847.1.p|PACid:30218796	0.699	1.62337916195456	0.0188	2	stress.abiotic.heat	AT3G12580.1	heat shock protein 70	Abiotic/biotic stress
RT1-D1W	9169	Pavir.Fa00806.1	30186240	Pavir.Fa00806.1.p|PACid:30186240	1.6903	3.22723805240632	<.0001	2	stress.abiotic.heat	AT3G14200.1	Chaperone DnaJ-domain superfamily protein	Abiotic/biotic stress
RT1-D1W	8669	Pavir.Hb00345.1	30266163	Pavir.Hb00345.1.p|PACid:30266163	-0.3022	0.811014717270659	0.2927	2	stress.biotic.PR-proteins	AT3G14470.1	NB-ARC domain-containing disease resistance protein	Abiotic/biotic stress
RT1-D1W	9615	Pavir.J39316.1	30184982	Pavir.J39316.1.p|PACid:30184982	-0.2157	0.861128236304998	0.0568	2	stress.biotic.PR-proteins	AT3G14470.1	NB-ARC domain-containing disease resistance protein	Abiotic/biotic stress
RT1-D1W	3658	Pavir.Ca01135.1	30203850	Pavir.Ca01135.1.p|PACid:30203850	0.5483	1.46236150631192	<.0001	5	stress.abiotic.cold	AT3G17020.1	Adenine nucleotide alpha hydrolases-like superfamily protein	Abiotic/biotic stress
RT1-D1W	2665	Pavir.J36682.1	30243106	Pavir.J36682.1.p|PACid:30243106	0.41544	1.33370537488266	<.0001	10	stress.abiotic.cold	AT3G17020.1	Adenine nucleotide alpha hydrolases-like superfamily protein	Abiotic/biotic stress
RT1-D1W	8179	Pavir.Eb00451.1	30310091	Pavir.Eb00451.1.p|PACid:30310091	-0.2122	0.863219882593732	0.1221	4	stress.abiotic.cold	AT3G17020.1	Adenine nucleotide alpha hydrolases-like superfamily protein	Abiotic/biotic stress
RT1-D1W	5564	Pavir.J12160.1	30314676	Pavir.J12160.1.p|PACid:30314676	0.9748	1.96536872024684	0.0131	2	stress.abiotic.cold	AT3G17020.1	Adenine nucleotide alpha hydrolases-like superfamily protein	Abiotic/biotic stress
RT1-D1W	6358	Pavir.Ea01530.1	30226243	Pavir.Ea01530.1.p|PACid:30226243	-0.04524	0.969128583825529	0.7215	8	stress.biotic.PR-proteins	AT3G17210.1	heat stable protein 1	Abiotic/biotic stress
RT1-D1W	6012	Pavir.Eb01083.1	30314312	Pavir.Eb01083.1.p|PACid:30314312	0.7603	1.69384281281706	<.0001	7	stress.biotic	AT3G18165.1	modifier of snc1,4	Abiotic/biotic stress
RT1-D1W	4920	Pavir.Gb02549.1	30224784	Pavir.Gb02549.1.p|PACid:30224784	0.4995	1.41372351822445	0.0142	2	stress.biotic	AT3G19690.1	CAP (Cysteine-rich secretory proteins, Antigen 5, and Pathogenesis-related 1 protein) superfamily protein	Abiotic/biotic stress
RT1-D1W	5606	Pavir.Ib01212.1	30238827	Pavir.Ib01212.1.p|PACid:30238827	0.2961	1.22782078701725	0.0501	3	stress.biotic	AT3G19690.1	CAP (Cysteine-rich secretory proteins, Antigen 5, and Pathogenesis-related 1 protein) superfamily protein	Abiotic/biotic stress
RT1-D1W	4168	Pavir.Ib00375.1	30240843	Pavir.Ib00375.1.p|PACid:30240843	-0.7165	0.608572057775478	<.0001	7	stress.abiotic.heat	AT3G22530.1	N	Abiotic/biotic stress
RT1-D1W	6035	Pavir.Ib04311.1	30239723	Pavir.Ib04311.1.p|PACid:30239723	0.03916	1.02751538816327	0.8025	3	stress.biotic	AT3G25070.1	RPM1 interacting protein 4	Abiotic/biotic stress
RT1-D1W	4162	Pavir.Ia00039.1	30211279	Pavir.Ia00039.1.p|PACid:30211279	0.2069	1.1542054113214	0.0499	6	stress.biotic	AT3G25070.1	RPM1 interacting protein 4	Abiotic/biotic stress
RT1-D1W	4670	Pavir.Fb01980.1	30280991	Pavir.Fb01980.1.p|PACid:30280991	0.0514	1.03627003879565	0.7294	5	stress.biotic	AT3G25070.1	RPM1 interacting protein 4	Abiotic/biotic stress
RT1-D1W	1147	Pavir.Ab02600.1	30236008	Pavir.Ab02600.1.p|PACid:30236008	0.04211	1.02961858493535	0.6636	9	stress.abiotic.heat	AT3G44110.1	DNAJ homologue 3	Abiotic/biotic stress
RT1-D1W	929	Pavir.Ia01140.1	30211245	Pavir.Ia01140.1.p|PACid:30211245	0.3807	1.30197342365558	0.0022	10	stress.abiotic.heat	AT3G44110.1	DNAJ homologue 3	Abiotic/biotic stress
RT1-D1W	1002	Pavir.Ib04128.1	30241546	Pavir.Ib04128.1.p|PACid:30241546	0.03988	1.02802831410845	0.6676	6	stress.abiotic.heat	AT3G44110.1	DNAJ homologue 3	Abiotic/biotic stress
RT1-D1W	704	Pavir.J00426.1	30202062	Pavir.J00426.1.p|PACid:30202062	0.20574	1.15327774461402	<.0001	24	stress.abiotic.heat	AT3G44110.1	DNAJ homologue 3	Abiotic/biotic stress
RT1-D1W	750	Pavir.J13853.1	30246889	Pavir.J13853.1.p|PACid:30246889	0.1066	1.07668781355647	0.0432	20	stress.abiotic.heat	AT3G44110.1	DNAJ homologue 3	Abiotic/biotic stress
RT1-D1W	1605	Pavir.Ib01136.1	30237887	Pavir.Ib01136.1.p|PACid:30237887	1.7062	3.26300229017062	<.0001	20	stress.abiotic.heat	AT3G46230.1	heat shock protein 17.4	Abiotic/biotic stress
RT1-D1W	6947	Pavir.Ab03099.1	30236611	Pavir.Ab03099.1.p|PACid:30236611	1.4505	2.73302754455979	0.0011	2	stress.abiotic.heat	AT3G46230.1	heat shock protein 17.4	Abiotic/biotic stress
RT1-D1W	7803	Pavir.Hb00342.1	30265211	Pavir.Hb00342.1.p|PACid:30265211	0.1689	1.12420099740275	0.3508	8	stress.biotic	AT3G46530.1	NB-ARC domain-containing disease resistance protein	Abiotic/biotic stress
RT1-D1W	7266	Pavir.Ga00409.1	30303502	Pavir.Ga00409.1.p|PACid:30303502	0.846	1.79751025322206	0.0013	2	stress.abiotic	AT3G47860.1	chloroplastic lipocalin	Abiotic/biotic stress
RT1-D1W	8942	Pavir.Bb01899.1	30299100	Pavir.Bb01899.1.p|PACid:30299100	0.611	1.5273174979607	0.0021	2	stress.biotic.signalling	AT3G48090.1	alpha/beta-Hydrolases superfamily protein	Abiotic/biotic stress
RT1-D1W	3088	Pavir.Eb03620.1	30313225	Pavir.Eb03620.1.p|PACid:30313225	-0.03507	0.975984404568684	0.6163	22	stress.abiotic.unspecified	AT3G51780.1	BCL-2-associated athanogene 4	Abiotic/biotic stress
RT1-D1W	1847	Pavir.J00438.1	30201207	Pavir.J00438.1.p|PACid:30201207	0.73186	1.66077887737436	<.0001	12	stress.abiotic.cold	AT3G53990.1	Adenine nucleotide alpha hydrolases-like superfamily protein	Abiotic/biotic stress
RT1-D1W	1545	Pavir.J08010.1	30306634	Pavir.J08010.1.p|PACid:30306634	0.63775	1.55590071270089	<.0001	18	stress.abiotic.cold	AT3G53990.1	Adenine nucleotide alpha hydrolases-like superfamily protein	Abiotic/biotic stress
RT1-D1W	5518	Pavir.J09458.1	30231778	Pavir.J09458.1.p|PACid:30231778	3.0574	8.32470991191667	<.0001	2	stress.biotic	AT3G54420.1	homolog of carrot EP3-3 chitinase	Abiotic/biotic stress
RT1-D1W	5738	Pavir.Gb01434.1	30221789	Pavir.Gb01434.1.p|PACid:30221789	2.4186	5.34651940616056	<.0001	6	stress.biotic	AT3G54420.1	homolog of carrot EP3-3 chitinase	Abiotic/biotic stress
RT1-D1W	5317	Pavir.J17463.1	30282282	Pavir.J17463.1.p|PACid:30282282	1.5346	2.89708095634787	0.0006	3	stress.biotic	AT3G54420.1	homolog of carrot EP3-3 chitinase	Abiotic/biotic stress
RT1-D1W	6852	Pavir.Aa01411.1	30249159	Pavir.Aa01411.1.p|PACid:30249159	0.46358	1.37895941821687	<.0001	4	stress.biotic	AT3G54420.1	homolog of carrot EP3-3 chitinase	Abiotic/biotic stress
RT1-D1W	1977	Pavir.Ea01912.1	30231086	Pavir.Ea01912.1.p|PACid:30231086	0.56277	1.47710255943144	<.0001	3	stress.abiotic.heat	AT3G57340.1	Heat shock protein DnaJ, N-terminal with domain of unknown function (DUF1977)	Abiotic/biotic stress
RT1-D1W	1858	Pavir.Eb01397.1	30309737	Pavir.Eb01397.1.p|PACid:30309737	0.45329	1.36915900375643	<.0001	4	stress.abiotic.heat	AT3G57340.1	Heat shock protein DnaJ, N-terminal with domain of unknown function (DUF1977)	Abiotic/biotic stress
RT1-D1W	6851	Pavir.Ea03320.1	30226855	Pavir.Ea03320.1.p|PACid:30226855	0.05219	1.03683764143517	0.6006	4	stress.biotic.PR-proteins	AT3G58090.1	Disease resistance-responsive (dirigent-like protein) family protein	Abiotic/biotic stress
RT1-D1W	3414	Pavir.Ca02141.1	30203948	Pavir.Ca02141.1.p|PACid:30203948	0.70504	1.63018986263896	<.0001	9	stress.abiotic.unspecified	AT3G62020.1	germin-like protein 10	Abiotic/biotic stress
RT1-D1W	671	Pavir.Ca01139.1	30203403	Pavir.Ca01139.1.p|PACid:30203403	-0.16836	0.88985365770664	<.0001	61	stress.abiotic.heat	AT3G62600.1	DNAJ heat shock family protein	Abiotic/biotic stress
RT1-D1W	7930	Pavir.Gb01030.1	30222827	Pavir.Gb01030.1.p|PACid:30222827	-0.08468	0.942993675413437	0.4455	5	stress.abiotic.drought/salt	AT4G00740.1	S-adenosyl-L-methionine-dependent methyltransferases superfamily protein	Abiotic/biotic stress
RT1-D1W	2373	Pavir.Gb00894.1	30222887	Pavir.Gb00894.1.p|PACid:30222887	0.365	1.28788162950983	0.057	3	stress.abiotic.drought/salt	AT4G00750.1	S-adenosyl-L-methionine-dependent methyltransferases superfamily protein	Abiotic/biotic stress
RT1-D1W	2897	Pavir.Ab02606.1	30234359	Pavir.Ab02606.1.p|PACid:30234359	0.08427	1.06015117184738	0.5263	3	stress.abiotic.drought/salt	AT4G00750.1	S-adenosyl-L-methionine-dependent methyltransferases superfamily protein	Abiotic/biotic stress
RT1-D1W	6657	Pavir.Ia00724.1	30212317	Pavir.Ia00724.1.p|PACid:30212317	0.71949	1.64659985025637	<.0001	5	stress.abiotic.heat	AT4G07990.1	Chaperone DnaJ-domain superfamily protein	Abiotic/biotic stress
RT1-D1W	7732	Pavir.Ia02496.1	30210337	Pavir.Ia02496.1.p|PACid:30210337	0.58124	1.49613462762118	<.0001	2	stress.abiotic.unspecified	AT4G08685.1	Pollen Ole e 1 allergen and extensin family protein	Abiotic/biotic stress
RT1-D1W	1168	Pavir.Ga01718.1	30303744	Pavir.Ga01718.1.p|PACid:30303744	1.367	2.57933650131177	<.0001	32	stress.abiotic.heat	AT4G10250.1	HSP20-like chaperones superfamily protein	Abiotic/biotic stress
RT1-D1W	2780	Pavir.Hb01472.1	30265909	Pavir.Hb01472.1.p|PACid:30265909	1.3075	2.4751226208771	<.0001	9	stress.abiotic.heat	AT4G10250.1	HSP20-like chaperones superfamily protein	Abiotic/biotic stress
RT1-D1W	758	Pavir.J07818.1	30243543	Pavir.J07818.1.p|PACid:30243543	1.3384	2.52870720622878	<.0001	39	stress.abiotic.heat	AT4G10250.1	HSP20-like chaperones superfamily protein	Abiotic/biotic stress
RT1-D1W	3141	Pavir.Bb03197.1	30299608	Pavir.Bb03197.1.p|PACid:30299608	2.3293	5.02561446307462	<.0001	14	stress.abiotic	AT4G11650.1	osmotin 34	Abiotic/biotic stress
RT1-D1W	8654	Pavir.Cb00109.1	30267809	Pavir.Cb00109.1.p|PACid:30267809	1.2637	2.40110750678438	0.0023	2	stress.abiotic	AT4G11650.1	osmotin 34	Abiotic/biotic stress
RT1-D1W	2063	Pavir.Eb03806.1	30312699	Pavir.Eb03806.1.p|PACid:30312699	3.0253	8.14153034445178	<.0001	20	stress.abiotic	AT4G11650.1	osmotin 34	Abiotic/biotic stress
RT1-D1W	6279	Pavir.Bb00799.1	30298345	Pavir.Bb00799.1.p|PACid:30298345	2.7521	6.73697058390029	<.0001	3	stress.abiotic	AT4G11650.1	osmotin 34	Abiotic/biotic stress
RT1-D1W	3687	Pavir.Hb01772.1	30264897	Pavir.Hb01772.1.p|PACid:30264897	1.6982	3.24495843788706	<.0001	8	stress.abiotic	AT4G11650.1	osmotin 34	Abiotic/biotic stress
RT1-D1W	4589	Pavir.Ea03024.1	30231561	Pavir.Ea03024.1.p|PACid:30231561	2.9721	7.84677591011867	<.0001	7	stress.abiotic	AT4G11650.1	osmotin 34	Abiotic/biotic stress
RT1-D1W	629	Pavir.Aa00616.1	30252567	Pavir.Aa00616.1.p|PACid:30252567	0.07605	1.0541279559487	0.3345	17	stress.abiotic.heat	AT4G16660.1	heat shock protein 70 (Hsp 70) family protein	Abiotic/biotic stress
RT1-D1W	755	Pavir.Ab03105.1	30235951	Pavir.Ab03105.1.p|PACid:30235951	0.02144	1.01497205038814	0.7403	14	stress.abiotic.heat	AT4G16660.1	heat shock protein 70 (Hsp 70) family protein	Abiotic/biotic stress
RT1-D1W	5676	Pavir.Ib03044.1	30242865	Pavir.Ib03044.1.p|PACid:30242865	0.21893	1.16387006170448	0.0156	9	stress.abiotic.drought/salt	AT4G19120.1	S-adenosyl-L-methionine-dependent methyltransferases superfamily protein	Abiotic/biotic stress
RT1-D1W	4155	Pavir.J16324.1	30195095	Pavir.J16324.1.p|PACid:30195095	1.1304	2.18919429192531	0.0054	2	stress.abiotic.heat	AT4G21320.1	Aldolase-type TIM barrel family protein	Abiotic/biotic stress
RT1-D1W	4176	Pavir.Db00351.1	30262264	Pavir.Db00351.1.p|PACid:30262264	1.3807	2.60394684731116	0.0005	2	stress.abiotic.heat	AT4G21320.1	Aldolase-type TIM barrel family protein	Abiotic/biotic stress
RT1-D1W	7052	Pavir.Ea00102.1	30230749	Pavir.Ea00102.1.p|PACid:30230749	-0.3959	0.760015106607875	<.0001	6	stress.biotic	AT4G23630.1	VIRB2-interacting protein 1	Abiotic/biotic stress
RT1-D1W	6281	Pavir.Eb03120.1	30313090	Pavir.Eb03120.1.p|PACid:30313090	0.46914	1.38428404129512	<.0001	5	stress.biotic	AT4G23630.1	VIRB2-interacting protein 1	Abiotic/biotic stress
RT1-D1W	1379	Pavir.Db00008.1	30261825	Pavir.Db00008.1.p|PACid:30261825	0.4718	1.38683869913771	0.0292	3	stress.abiotic.heat	AT4G24190.1	Chaperone protein htpG family protein	Abiotic/biotic stress
RT1-D1W	593	Pavir.J30437.1	30285728	Pavir.J30437.1.p|PACid:30285728	0.63591	1.55391759612032	<.0001	35	stress.abiotic.heat	AT4G24190.2	Chaperone protein htpG family protein	Abiotic/biotic stress
RT1-D1W	197	Pavir.Ca00431.1	30205375	Pavir.Ca00431.1.p|PACid:30205375	-0.28316	0.821789042919528	<.0001	103	stress.abiotic.heat	AT4G24280.1	chloroplast heat shock protein 70-1	Abiotic/biotic stress
RT1-D1W	401	Pavir.J01685.1	30190683	Pavir.J01685.1.p|PACid:30190683	0.60899	1.52519108140067	<.0001	28	stress.abiotic.heat	AT4G24280.1	chloroplast heat shock protein 70-1	Abiotic/biotic stress
RT1-D1W	1589	Pavir.J11083.1	30254469	Pavir.J11083.1.p|PACid:30254469	0.7007	1.62529319860728	0.0058	3	stress.abiotic.heat	AT4G24280.1	chloroplast heat shock protein 70-1	Abiotic/biotic stress
RT1-D1W	5649	Pavir.J35561.1	30296468	Pavir.J35561.1.p|PACid:30296468	0.52536	1.43929268620482	<.0001	4	stress.biotic	AT4G26090.1	NB-ARC domain-containing disease resistance protein	Abiotic/biotic stress
RT1-D1W	3124	Pavir.Ba00689.1	30289496	Pavir.Ba00689.1.p|PACid:30289496	-0.47639	0.718773935868653	<.0001	13	stress.abiotic.unspecified	AT4G27320.1	Adenine nucleotide alpha hydrolases-like superfamily protein	Abiotic/biotic stress
RT1-D1W	7386	Pavir.Ia02656.1	30213207	Pavir.Ia02656.1.p|PACid:30213207	1.3796	2.60196219376157	<.0001	4	stress.abiotic.heat	AT4G27670.1	heat shock protein 21	Abiotic/biotic stress
RT1-D1W	1027	Pavir.Ib01026.1	30238031	Pavir.Ib01026.1.p|PACid:30238031	1.9865	3.96274463240513	<.0001	9	stress.abiotic.heat	AT4G27670.1	heat shock protein 21	Abiotic/biotic stress
RT1-D1W	6344	Pavir.Ib02662.1	30241616	Pavir.Ib02662.1.p|PACid:30241616	1.21933	2.32838559948827	<.0001	5	stress.abiotic.heat	AT4G27670.1	heat shock protein 21	Abiotic/biotic stress
RT1-D1W	5466	Pavir.Ib02744.1	30237056	Pavir.Ib02744.1.p|PACid:30237056	1.44999	2.73206157623537	<.0001	10	stress.abiotic.heat	AT4G27670.1	heat shock protein 21	Abiotic/biotic stress
RT1-D1W	1094	Pavir.J08073.1	30308630	Pavir.J08073.1.p|PACid:30308630	1.7501	3.36381881508702	<.0001	10	stress.abiotic.heat	AT4G27670.1	heat shock protein 21	Abiotic/biotic stress
RT1-D1W	3341	Pavir.Fa01476.1	30186955	Pavir.Fa01476.1.p|PACid:30186955	1.3758	2.59511774923035	<.0001	6	stress.abiotic.heat	AT4G27670.1	heat shock protein 21	Abiotic/biotic stress
[truncated: 6,855 more rows]

## Sheet: RT1-D3W
Treatment	pro_hit_num	pro_acc	pro_ID	pro_acc_ID	log2_fold	fold_change	p_value	num_pep	at_acc	at_annota	Functional group at
[truncated: 7,066 more rows]

[truncated: 4 more sheets: RT2-SDT, RT2-D1W, RT2-D3W, Data for Fig3]
