# Supplementary material for: Comparative Proteomics of Root Apex and Root Elongation Zones Provides Insights into Molecular Mechanisms for Drought Stress and Recovery Adjustment in Switchgrass
Source: Proteomes. 2020 Feb 19;8(1):3. doi: 10.3390/proteomes8010003 (PMC7151713; doi:10.3390/proteomes8010003)
Supplement: Supplementary file 1 [file proteomes-08-00003-s001.zip › Final_Revised_Supplemental Data/Table S5. Supplemental data for Fig 4_Functional classification of differentially expressed proteins.xlsx]

## Sheet: RT2_SDT_DEPs
Treatment	pro_hit_num	pro_acc	pro_ID	pro_acc_ID	log2_fold	fold_change	p_value	num_unique pep	Functional group at	at_acc	at_annota	at_acc	Functional group	RT2_SDT_up	RT2_SDT_Dn
SDT	5843	Pavir.Bb00468.1	30298354	Pavir.Bb00468.1.p|PACid:30298354	1.9007	3.73394	0.0012	5	Abiotic / biotic stress	AT2G18250.1	4-phosphopantetheine adenylyltransferase	AT2G18250.1	Abiotic / biotic stress	42	1
SDT	5674	Pavir.Eb01034.1	30311864	Pavir.Eb01034.1.p|PACid:30311864	-1.3738	0.385874	0.0287	4	Abiotic/biotic stress	AT5G23950.1	Calcium-dependent lipid-binding (CaLB domain) family protein	AT5G23950.1	Amino acid metabolism	13	1
SDT	1238	Pavir.J17471.1	30294892	Pavir.J17471.1.p|PACid:30294892	1.3915	2.62351	<.0001	43	Abiotic/biotic stress	AT5G39110.1	RmlC-like cupins superfamily protein	AT5G39110.1	Carbohydrates metabolism	1	0
SDT	758	Pavir.Ga01718.1	30303744	Pavir.Ga01718.1.p|PACid:30303744	1.4008	2.64048	<.0001	23	Abiotic/biotic stress	AT4G10250.1	HSP20-like chaperones superfamily protein	AT4G10250.1	Cell organization	5	0
SDT	2611	Pavir.Da01522.1	30193790	Pavir.Da01522.1.p|PACid:30193790	1.4055	2.6491	<.0001	6	Abiotic/biotic stress	AT1G05260.1	Peroxidase superfamily protein	AT1G05260.1	Cell wall synthesis / modification	5	1
SDT	2063	Pavir.J00438.1	30201207	Pavir.J00438.1.p|PACid:30201207	1.4176	2.67141	<.0001	8	Abiotic/biotic stress	AT3G53990.1	Adenine nucleotide alpha hydrolases-like superfamily protein	AT3G53990.1	Development	16	1
SDT	3521	Pavir.J28620.1	30314458	Pavir.J28620.1.p|PACid:30314458	1.4635	2.75777	<.0001	14	Abiotic/biotic stress	AT5G24090.1	chitinase A	AT5G24090.1	DNA synthesis	4	0
SDT	4405	Pavir.Ia01182.1	30215723	Pavir.Ia01182.1.p|PACid:30215723	1.5071	2.84238	<.0001	13	Abiotic/biotic stress	AT5G04890.1	HSP20-like chaperones superfamily protein	AT5G04890.1	Fermentation	0	1
SDT	4554	Pavir.Eb02336.1	30308702	Pavir.Eb02336.1.p|PACid:30308702	1.5312	2.89026	0.0016	4	Abiotic/biotic stress	AT2G21100.1	Disease resistance-responsive (dirigent-like protein) family protein	AT2G21100.1	Functional enzyme	57	4
SDT	457	Pavir.J08073.1	30308630	Pavir.J08073.1.p|PACid:30308630	1.5501	2.92837	<.0001	11	Abiotic/biotic stress	AT4G27670.1	heat shock protein 21	AT4G27670.1	Glycolysis	2	0
SDT	1860	Pavir.J08010.1	30306634	Pavir.J08010.1.p|PACid:30306634	1.5577	2.94384	<.0001	15	Abiotic/biotic stress	AT3G53990.1	Adenine nucleotide alpha hydrolases-like superfamily protein	AT3G53990.1	Lipids metabolism	9	0
SDT	1198	Pavir.Aa00282.1	30253178	Pavir.Aa00282.1.p|PACid:30253178	1.5586	2.94568	0.0012	6	Abiotic/biotic stress	AT1G54050.1	HSP20-like chaperones superfamily protein	AT1G54050.1	Major CHO metabolism	13	0
SDT	4410	Pavir.Fa01006.1	30188438	Pavir.Fa01006.1.p|PACid:30188438	1.5862	3.00257	<.0001	7	Abiotic/biotic stress	AT1G68300.1	Adenine nucleotide alpha hydrolases-like superfamily protein	AT1G68300.1	Metal binding	3	0
SDT	4652	Pavir.Fb01262.1	30280025	Pavir.Fb01262.1.p|PACid:30280025	1.5937	3.01822	0.0012	5	Abiotic/biotic stress	AT1G68300.1	Adenine nucleotide alpha hydrolases-like superfamily protein	AT1G68300.1	Minor CHO metabolism	6	0
SDT	4999	Pavir.Ia01975.1	30210367	Pavir.Ia01975.1.p|PACid:30210367	1.6319	3.09921	<.0001	10	Abiotic/biotic stress	AT5G40020.1	Pathogenesis-related thaumatin superfamily protein	AT5G40020.1	Mitochondrial electron transport / ATP synthesis	10	1
SDT	5005	Pavir.Db00351.1	30262264	Pavir.Db00351.1.p|PACid:30262264	1.6322	3.09985	<.0001	11	Abiotic/biotic stress	AT4G21320.1	Aldolase-type TIM barrel family protein	AT4G21320.1	Nucleotide metabolism	3	1
SDT	4596	Pavir.J08876.1	30275693	Pavir.J08876.1.p|PACid:30275693	1.6635	3.16784	<.0001	10	Abiotic/biotic stress	AT3G12500.1	basic chitinase	AT3G12500.1	Phyto-hormone metabolism	11	5
SDT	6225	Pavir.J15194.1	30216067	Pavir.J15194.1.p|PACid:30216067	1.6875	3.22098	<.0001	2	Abiotic/biotic stress	AT3G10680.1	HSP20-like chaperones superfamily protein	AT3G10680.1	Protein degradation	13	1
SDT	1830	Pavir.J37362.1	30294839	Pavir.J37362.1.p|PACid:30294839	1.7152	3.28342	0.049	4	Abiotic/biotic stress	AT1G74310.1	heat shock protein 101	AT1G74310.1	Protein modification	1	0
SDT	5648	Pavir.Ab03099.1	30236611	Pavir.Ab03099.1.p|PACid:30236611	1.7872	3.45144	0.002	4	Abiotic/biotic stress	AT3G46230.1	heat shock protein 17.4	AT3G46230.1	Protein synthesis	4	1
SDT	7598	Pavir.Ea03336.1	30229570	Pavir.Ea03336.1.p|PACid:30229570	1.8072	3.49962	0.0107	2	Abiotic/biotic stress	AT2G28790.1	Pathogenesis-related thaumatin superfamily protein	AT2G28790.1	Protein targeting & vesicle tansport	5	0
SDT	5979	Pavir.Bb00799.1	30298345	Pavir.Bb00799.1.p|PACid:30298345	1.858	3.62505	0.0001	3	Abiotic/biotic stress	AT4G11650.1	osmotin 34	AT4G11650.1	Redox balance	11	0
SDT	1368	Pavir.J21349.1	30225604	Pavir.J21349.1.p|PACid:30225604	1.8731	3.66319	<.0001	8	Abiotic/biotic stress	AT1G54050.1	HSP20-like chaperones superfamily protein	AT1G54050.1	Regulation of transcription	5	2
SDT	4296	Pavir.J00136.1	30254398	Pavir.J00136.1.p|PACid:30254398	1.8767	3.67234	<.0001	6	Abiotic/biotic stress	AT5G04890.1	HSP20-like chaperones superfamily protein	AT5G04890.1	RNA processing	4	0
SDT	6856	Pavir.Ib02662.1	30241616	Pavir.Ib02662.1.p|PACid:30241616	1.8987	3.72877	0.0044	3	Abiotic/biotic stress	AT4G27670.1	heat shock protein 21	AT4G27670.1	S-assimilation	0	1
SDT	2330	Pavir.Ab00731.1	30236320	Pavir.Ab00731.1.p|PACid:30236320	1.9117	3.76252	<.0001	12	Abiotic/biotic stress	AT1G52560.1	HSP20-like chaperones superfamily protein	AT1G52560.1	Secondary metabolism	6	1
SDT	5071	Pavir.Bb03197.1	30299608	Pavir.Bb03197.1.p|PACid:30299608	1.9278	3.80475	<.0001	9	Abiotic/biotic stress	AT4G11650.1	osmotin 34	AT4G11650.1	Signaling regulation	16	1
SDT	3181	Pavir.J34564.1	30263851	Pavir.J34564.1.p|PACid:30263851	1.933	3.81848	<.0001	10	Abiotic/biotic stress	AT3G12500.1	basic chitinase	AT3G12500.1	TCA cycle	2	0
SDT	917	Pavir.J19824.1	30189354	Pavir.J19824.1.p|PACid:30189354	1.9722	3.92366	<.0001	11	Abiotic/biotic stress	AT5G59720.1	heat shock protein 18.2	AT5G59720.1	Transport	19	0
SDT	8248	Pavir.Ib03442.1	30242333	Pavir.Ib03442.1.p|PACid:30242333	1.9797	3.94411	<.0001	4	Abiotic/biotic stress	AT5G40020.1	Pathogenesis-related thaumatin superfamily protein	AT5G40020.1	Unclassified	81	4
SDT	3026	Pavir.Ca00609.1	30204579	Pavir.Ca00609.1.p|PACid:30204579	2.0788	4.22456	<.0001	8	Abiotic/biotic stress	AT2G38870.1	Serine protease inhibitor, potato inhibitor I-type family protein	AT2G38870.1
SDT	43	Pavir.Ia03665.1	30210947	Pavir.Ia03665.1.p|PACid:30210947	2.0978	4.28056	<.0001	6	Abiotic/biotic stress	AT5G02500.1	heat shock cognate protein 70-1	AT5G02500.1
SDT	5148	Pavir.Ia01894.1	30209168	Pavir.Ia01894.1.p|PACid:30209168	2.12615	4.36551	<.0001	8	Abiotic/biotic stress	AT5G20970.1	HSP20-like chaperones superfamily protein	AT5G20970.1
SDT	4601	Pavir.Eb03806.1	30312699	Pavir.Eb03806.1.p|PACid:30312699	2.2137	4.63863	<.0001	11	Abiotic/biotic stress	AT4G11650.1	osmotin 34	AT4G11650.1
SDT	4861	Pavir.Ia04457.1	30209221	Pavir.Ia04457.1.p|PACid:30209221	2.3052	4.94236	<.0001	3	Abiotic/biotic stress	AT3G12500.1	basic chitinase	AT3G12500.1
SDT	7651	Pavir.Ea02477.1	30226286	Pavir.Ea02477.1.p|PACid:30226286	2.3068	4.94784	0.0002	2	Abiotic/biotic stress	AT5G24090.1	chitinase A	AT5G24090.1
SDT	44	Pavir.Ib01278.1	30237881	Pavir.Ib01278.1.p|PACid:30237881	2.6008	6.06623	0.0305	2	Abiotic/biotic stress	AT5G02500.1	heat shock cognate protein 70-1	AT5G02500.1
SDT	4395	Pavir.Ib00193.1	30238328	Pavir.Ib00193.1.p|PACid:30238328	2.832	7.12061	<.0001	3	Abiotic/biotic stress	AT3G12500.1	basic chitinase	AT3G12500.1
SDT	850	Pavir.J13075.1	30246880	Pavir.J13075.1.p|PACid:30246880	3.0176	8.09819	<.0001	6	Abiotic/biotic stress	AT5G66400.1	Dehydrin family protein	AT5G66400.1
SDT	8333	Pavir.J36772.1	30203019	Pavir.J36772.1.p|PACid:30203019	3.178	9.05052	0.004	3	Abiotic/biotic stress	AT3G04720.1	pathogenesis-related 4	AT3G04720.1
SDT	1908	Pavir.J31919.1	30199244	Pavir.J31919.1.p|PACid:30199244	3.3624	10.2845	0.0003	2	Abiotic/biotic stress	AT5G52300.2	CAP160 protein	AT5G52300.2
SDT	3704	Pavir.Db00371.1	30262621	Pavir.Db00371.1.p|PACid:30262621	1.3239	2.50342	<.0001	4	Amino acid metabolism	AT4G20930.1	6-phosphogluconate dehydrogenase family protein	AT4G20930.1
SDT	2646	Pavir.Ib03192.1	30238114	Pavir.Ib03192.1.p|PACid:30238114	1.3503	2.54965	0.0475	5	Amino acid metabolism	AT4G08900.1	arginase	AT4G08900.1
SDT	2508	Pavir.Ia03536.1	30209583	Pavir.Ia03536.1.p|PACid:30209583	1.387	2.61534	<.0001	15	Amino acid metabolism	AT5G10920.1	L-Aspartase-like family protein	AT5G10920.1
SDT	6094	Pavir.J17816.1	30285619	Pavir.J17816.1.p|PACid:30285619	1.4009	2.64066	<.0001	7	Amino acid metabolism	AT4G33150.1	lysine-ketoglutarate reductase/saccharopine dehydrogenase bifunctional enzyme	AT4G33150.1
SDT	4009	Pavir.Da02439.1	30193736	Pavir.Da02439.1.p|PACid:30193736	1.4491	2.73038	<.0001	10	Amino acid metabolism	AT5G54080.1	homogentisate 1,2-dioxygenase	AT5G54080.1
SDT	5658	Pavir.Cb00234.1	30267583	Pavir.Cb00234.1.p|PACid:30267583	1.4676	2.76561	<.0001	5	Amino acid metabolism	AT3G63250.1	homocysteine methyltransferase 2	AT3G63250.1
SDT	189	Pavir.Fa02123.1	30186363	Pavir.Fa02123.1.p|PACid:30186363	1.6287	3.09234	<.0001	19	Amino acid metabolism	AT1G11840.6	glyoxalase I homolog	AT1G11840.6
SDT	514	Pavir.Fa00915.1	30186533	Pavir.Fa00915.1.p|PACid:30186533	1.6666	3.17466	0.0135	6	Amino acid metabolism	AT5G17330.1	glutamate decarboxylase	AT5G17330.1
SDT	2917	Pavir.J30250.1	30218024	Pavir.J30250.1.p|PACid:30218024	1.8877	3.70045	<.0001	5	Amino acid metabolism	AT5G10870.1	chorismate mutase 2	AT5G10870.1
SDT	2960	Pavir.Ab00560.1	30234865	Pavir.Ab00560.1.p|PACid:30234865	2.1295	4.37566	0.0003	3	Amino acid metabolism	AT5G10870.1	chorismate mutase 2	AT5G10870.1
SDT	186	Pavir.Fb00620.1	30278273	Pavir.Fb00620.1.p|PACid:30278273	2.1598	4.46853	<.0001	19	Amino acid metabolism	AT1G11840.6	glyoxalase I homolog	AT1G11840.6
SDT	3629	Pavir.Ab02468.1	30233419	Pavir.Ab02468.1.p|PACid:30233419	1.3647	2.57523	<.0001	9	Amino acid metabolism	AT4G16800.1	ATP-dependent caseinolytic (Clp) protease/crotonase family protein	AT4G16800.1
SDT	2182	Pavir.Ib00795.1	30240552	Pavir.Ib00795.1.p|PACid:30240552	-1.4129	0.375556	<.0001	22	Ammonia metabolism	AT5G37600.1	glutamine synthase clone R1	AT5G37600.1
SDT	4858	Pavir.Ia00863.1	30209658	Pavir.Ia00863.1.p|PACid:30209658	1.7833	3.44213	0.0008	4	Ammonia metabolism	AT1G66200.1	glutamine synthase clone F11	AT1G66200.1
SDT	815	Pavir.Gb02335.1	30223182	Pavir.Gb02335.1.p|PACid:30223182	1.908	3.75288	<.0001	31	Calvin cycle / Pentose phosphate pathway	AT2G45290.1	Transketolase	AT2G45290.1
SDT	650	Pavir.J06234.1	30307099	Pavir.J06234.1.p|PACid:30307099	1.4283	2.69129	0.0218	4	Carbohydrates metabolism	AT5G14780.1	formate dehydrogenase	AT5G14780.1
SDT	342	Pavir.J00639.1	30255563	Pavir.J00639.1.p|PACid:30255563	1.427	2.68887	<.0001	29	Cell organization	AT5G09810.1	actin 7	AT5G09810.1
SDT	999	Pavir.Da01308.1	30191491	Pavir.Da01308.1.p|PACid:30191491	1.5397	2.90734	<.0001	35	Cell organization	AT5G65020.1	annexin 2	AT5G65020.1
SDT	3737	Pavir.Bb01893.1	30297522	Pavir.Bb01893.1.p|PACid:30297522	1.6877	3.22143	<.0001	16	Cell organization	AT1G68090.1	annexin 5	AT1G68090.1
SDT	1727	Pavir.J00892.1	30275043	Pavir.J00892.1.p|PACid:30275043	1.8728	3.66243	<.0001	12	Cell organization	AT1G01750.1	actin depolymerizing factor 11	AT1G01750.1
SDT	2042	Pavir.J16347.1	30307684	Pavir.J16347.1.p|PACid:30307684	2.0896	4.2563	<.0001	11	Cell organization	AT1G01750.1	actin depolymerizing factor 11	AT1G01750.1
SDT	3159	Pavir.Ga01268.1	30305723	Pavir.Ga01268.1.p|PACid:30305723	-1.4603	0.363418	<.0001	16	Cell wall synthesis / modification	AT5G49720.1	glycosyl hydrolase 9A1	AT5G49720.1
SDT	6988	Pavir.Ba00258.1	30291621	Pavir.Ba00258.1.p|PACid:30291621	1.5831	2.99613	<.0001	4	Cell wall synthesis / modification	AT3G10740.1	alpha-L-arabinofuranosidase 1	AT3G10740.1
SDT	5695	Pavir.Ab00369.2	30232205	Pavir.Ab00369.2.p|PACid:30232205	1.6447	3.12683	0.0001	3	Cell wall synthesis / modification	AT4G16130.1	arabinose kinase	AT4G16130.1
SDT	2525	Pavir.J14539.1	30270680	Pavir.J14539.1.p|PACid:30270680	1.8746	3.667	<.0001	13	Cell wall synthesis / modification	AT4G23920.1	UDP-D-glucose/UDP-D-galactose 4-epimerase 2	AT4G23920.1
SDT	2888	Pavir.Cb02121.1	30267871	Pavir.Cb02121.1.p|PACid:30267871	2.5587	5.89177	0.0001	2	Cell wall synthesis / modification	AT3G10740.1	alpha-L-arabinofuranosidase 1	AT3G10740.1
SDT	5142	Pavir.Ca00077.1	30203517	Pavir.Ca00077.1.p|PACid:30203517	3.4553	10.9685	0.0061	2	Cell wall synthesis / modification	AT3G10740.1	alpha-L-arabinofuranosidase 1	AT3G10740.1
SDT	4206	Pavir.Aa03261.1	30252981	Pavir.Aa03261.1.p|PACid:30252981	-2.3431	0.197086	<.0001	5	Development	AT5G66170.3	sulfurtransferase 18	AT5G66170.3
SDT	5068	Pavir.Bb02409.1	30298298	Pavir.Bb02409.1.p|PACid:30298298	1.3623	2.57095	<.0001	5	Development	AT2G33690.1	Late embryogenesis abundant protein, group 6	AT2G33690.1
SDT	1210	Pavir.Ca01850.1	30203800	Pavir.Ca01850.1.p|PACid:30203800	1.4052	2.64854	0.0053	7	Development	AT1G52690.1	Late embryogenesis abundant protein (LEA) family protein	AT1G52690.1
SDT	4731	Pavir.J19751.1	30274240	Pavir.J19751.1.p|PACid:30274240	1.4914	2.81162	<.0001	7	Development	AT1G28330.1	dormancy-associated protein-like 1	AT1G28330.1
SDT	2599	Pavir.Fa01066.1	30186321	Pavir.Fa01066.1.p|PACid:30186321	1.5071	2.84238	0.0004	2	Development	AT3G22490.1	Seed maturation protein	AT3G22490.1
SDT	6135	Pavir.Da01269.1	30191590	Pavir.Da01269.1.p|PACid:30191590	1.5771	2.98369	0.0002	6	Development	AT1G70670.1	Caleosin-related family protein	AT1G70670.1
SDT	672	Pavir.J19600.1	30274742	Pavir.J19600.1.p|PACid:30274742	1.6409	3.1186	<.0001	12	Development	AT3G22490.1	Seed maturation protein	AT3G22490.1
SDT	3485	Pavir.Ia02723.1	30214198	Pavir.Ia02723.1.p|PACid:30214198	1.9415	3.84105	<.0001	12	Development	AT2G03440.1	nodulin-related protein 1	AT2G03440.1
SDT	1480	Pavir.J27516.1	30294035	Pavir.J27516.1.p|PACid:30294035	2.0141	4.03929	<.0001	8	Development	AT3G22490.1	Seed maturation protein	AT3G22490.1
SDT	6231	Pavir.Ca01448.1	30204925	Pavir.Ca01448.1.p|PACid:30204925	2.1501	4.43859	<.0001	4	Development	AT3G51810.1	Stress induced protein	AT3G51810.1
SDT	4021	Pavir.Ia03678.1	30215378	Pavir.Ia03678.1.p|PACid:30215378	2.2211	4.66249	<.0001	6	Development	AT3G53040.1	late embryogenesis abundant protein, putative / LEA protein, putative	AT3G53040.1
SDT	4188	Pavir.J24821.1	30277014	Pavir.J24821.1.p|PACid:30277014	2.3747	5.18628	<.0001	8	Development	AT1G52690.1	Late embryogenesis abundant protein (LEA) family protein	AT1G52690.1
SDT	8236	Pavir.J00999.1	30308562	Pavir.J00999.1.p|PACid:30308562	2.5108	5.69936	<.0001	3	Development	AT2G36640.1	embryonic cell protein 63	AT2G36640.1
SDT	319	Pavir.Ca01780.1	30206225	Pavir.Ca01780.1.p|PACid:30206225	2.7224	6.5997	<.0001	17	Development	AT3G15670.1	Late embryogenesis abundant protein (LEA) family protein	AT3G15670.1
SDT	3697	Pavir.Fb01280.1	30278487	Pavir.Fb01280.1.p|PACid:30278487	3.138	8.80303	<.0001	12	Development	AT5G06760.1	Late Embryogenesis Abundant 4-5	AT5G06760.1
SDT	8358	Pavir.Db00978.1	30260586	Pavir.Db00978.1.p|PACid:30260586	3.1999	9.18895	0.0004	3	Development	AT5G06760.1	Late Embryogenesis Abundant 4-5	AT5G06760.1
SDT	345	Pavir.J00158.1	30282759	Pavir.J00158.1.p|PACid:30282759	3.3546	10.229	<.0001	47	Development	AT3G15670.1	Late embryogenesis abundant protein (LEA) family protein	AT3G15670.1
SDT	2382	Pavir.Fb02055.1	30278309	Pavir.Fb02055.1.p|PACid:30278309	1.489	2.80694	<.0001	12	DNA synthesis	AT5G59910.1	Histone superfamily protein	AT5G59910.1
SDT	423	Pavir.Ib00038.1	30238568	Pavir.Ib00038.1.p|PACid:30238568	1.60431	3.0405	<.0001	92	DNA synthesis	AT3G53730.1	Histone superfamily protein	AT3G53730.1
SDT	4324	Pavir.J05562.1	30267394	Pavir.J05562.1.p|PACid:30267394	1.9809	3.94739	<.0001	14	DNA synthesis	AT2G18050.1	histone H1-3	AT2G18050.1
SDT	4016	Pavir.Db02350.1	30262521	Pavir.Db02350.1.p|PACid:30262521	2.0213	4.05949	<.0001	11	DNA synthesis	AT2G18050.1	histone H1-3	AT2G18050.1
SDT	3681	Pavir.J34376.1	30255019	Pavir.J34376.1.p|PACid:30255019	-1.4326	0.370463	0.012	3	Fermentation	AT4G33070.1	Thiamine pyrophosphate dependent pyruvate decarboxylase family protein	AT4G33070.1
SDT	3676	Pavir.Ib01632.1	30237007	Pavir.Ib01632.1.p|PACid:30237007	-1.6474	0.319215	0.0089	4	Functional enzyme	AT5G42180.1	Peroxidase superfamily protein	AT5G42180.1
SDT	6201	Pavir.Ha00164.1	30318160	Pavir.Ha00164.1.p|PACid:30318160	-1.387	0.382359	0.0354	3	Functional enzyme	AT5G06060.1	NAD(P)-binding Rossmann-fold superfamily protein	AT5G06060.1
SDT	2945	Pavir.J04985.1	30196616	Pavir.J04985.1.p|PACid:30196616	-1.382	0.383687	0.0042	3	Functional enzyme	AT3G23600.1	alpha/beta-Hydrolases superfamily protein	AT3G23600.1
SDT	2643	Pavir.Ib01762.1	30238565	Pavir.Ib01762.1.p|PACid:30238565	-1.3118	0.402818	<.0001	15	Functional enzyme	AT5G58390.1	Peroxidase superfamily protein	AT5G58390.1
SDT	8829	Pavir.Fb01255.1	30279247	Pavir.Fb01255.1.p|PACid:30279247	1.3243	2.50411	<.0001	3	Functional enzyme	AT1G23740.1	Oxidoreductase, zinc-binding dehydrogenase family protein	AT1G23740.1
SDT	6448	Pavir.J01051.1	30191168	Pavir.J01051.1.p|PACid:30191168	1.331	2.51577	0.0205	4	Functional enzyme	AT1G02850.2	beta glucosidase 11	AT1G02850.2
SDT	9707	Pavir.Fa00664.1	30186226	Pavir.Fa00664.1.p|PACid:30186226	1.3501	2.5493	<.0001	2	Functional enzyme	AT3G50560.1	NAD(P)-binding Rossmann-fold superfamily protein	AT3G50560.1
SDT	2937	Pavir.Eb03308.1	30311409	Pavir.Eb03308.1.p|PACid:30311409	1.3502	2.54947	0.0024	2	Functional enzyme	AT3G62760.1	Glutathione S-transferase family protein	AT3G62760.1
SDT	1039	Pavir.Bb02933.1	30300552	Pavir.Bb02933.1.p|PACid:30300552	1.36325	2.57264	<.0001	42	Functional enzyme	AT5G55180.1	O-Glycosyl hydrolases family 17 protein	AT5G55180.1
SDT	2766	Pavir.Eb03845.1	30311172	Pavir.Eb03845.1.p|PACid:30311172	1.3831	2.60828	0.0001	9	Functional enzyme	AT3G62760.1	Glutathione S-transferase family protein	AT3G62760.1
SDT	2825	Pavir.Ab01247.1	30236234	Pavir.Ab01247.1.p|PACid:30236234	1.3877	2.61661	<.0001	10	Functional enzyme	AT2G15480.2	UDP-glucosyl transferase 73B5	AT2G15480.2
SDT	9381	Pavir.Ia01577.1	30213294	Pavir.Ia01577.1.p|PACid:30213294	1.3964	2.63244	<.0001	2	Functional enzyme	AT3G51000.1	alpha/beta-Hydrolases superfamily protein	AT3G51000.1
SDT	1620	Pavir.Ea02798.1	30227120	Pavir.Ea02798.1.p|PACid:30227120	1.3977	2.63481	<.0001	14	Functional enzyme	AT3G62760.1	Glutathione S-transferase family protein	AT3G62760.1
SDT	1520	Pavir.Ca00811.1	30204135	Pavir.Ca00811.1.p|PACid:30204135	1.3997	2.63847	<.0001	18	Functional enzyme	AT4G25150.1	HAD superfamily, subfamily IIIB acid phosphatase	AT4G25150.1
SDT	1406	Pavir.Hb00955.1	30266761	Pavir.Hb00955.1.p|PACid:30266761	1.4362	2.70607	<.0001	14	Functional enzyme	AT5G13980.1	Glycosyl hydrolase family 38 protein	AT5G13980.1
SDT	4279	Pavir.Eb01487.1	30312900	Pavir.Eb01487.1.p|PACid:30312900	1.4531	2.73796	<.0001	9	Functional enzyme	AT3G62760.1	Glutathione S-transferase family protein	AT3G62760.1
SDT	4462	Pavir.Eb03999.1	30313144	Pavir.Eb03999.1.p|PACid:30313144	1.4631	2.757	<.0001	7	Functional enzyme	AT1G71695.1	Peroxidase superfamily protein	AT1G71695.1
SDT	4463	Pavir.Eb02556.1	30310578	Pavir.Eb02556.1.p|PACid:30310578	1.4632	2.75719	0.0003	3	Functional enzyme	AT3G62760.1	Glutathione S-transferase family protein	AT3G62760.1
SDT	8714	Pavir.J25627.1	30272349	Pavir.J25627.1.p|PACid:30272349	1.5093	2.84672	0.0254	2	Functional enzyme	AT4G20860.1	FAD-binding Berberine family protein	AT4G20860.1
SDT	2252	Pavir.J12432.1	30201516	Pavir.J12432.1.p|PACid:30201516	1.5241	2.87607	<.0001	8	Functional enzyme	AT3G62760.1	Glutathione S-transferase family protein	AT3G62760.1
SDT	2171	Pavir.Fb00271.1	30281008	Pavir.Fb00271.1.p|PACid:30281008	1.5473	2.9227	<.0001	8	Functional enzyme	AT3G02100.1	UDP-Glycosyltransferase superfamily protein	AT3G02100.1
SDT	6450	Pavir.Ca01230.1	30206880	Pavir.Ca01230.1.p|PACid:30206880	1.5821	2.99405	<.0001	4	Functional enzyme	AT1G54870.1	NAD(P)-binding Rossmann-fold superfamily protein	AT1G54870.1
SDT	2343	Pavir.Fa01764.1	30187362	Pavir.Fa01764.1.p|PACid:30187362	1.5938	3.01843	<.0001	16	Functional enzyme	AT5G58090.1	O-Glycosyl hydrolases family 17 protein	AT5G58090.1
SDT	1632	Pavir.J08895.1	30257540	Pavir.J08895.1.p|PACid:30257540	1.5942	3.01927	<.0001	14	Functional enzyme	AT3G03080.1	Zinc-binding dehydrogenase family protein	AT3G03080.1
SDT	3524	Pavir.Ga00910.1	30305132	Pavir.Ga00910.1.p|PACid:30305132	1.6122	3.05718	0.0149	6	Functional enzyme	AT5G38010.1	UDP-Glycosyltransferase superfamily protein	AT5G38010.1
SDT	1078	Pavir.J02614.1	30306905	Pavir.J02614.1.p|PACid:30306905	1.6295	3.09406	<.0001	45	Functional enzyme	AT1G17180.1	glutathione S-transferase TAU 25	AT1G17180.1
SDT	2503	Pavir.Ib02422.1	30240684	Pavir.Ib02422.1.p|PACid:30240684	1.6322	3.09985	<.0001	9	Functional enzyme	AT3G03190.1	glutathione S-transferase F11	AT3G03190.1
SDT	5285	Pavir.Ia00908.1	30214178	Pavir.Ia00908.1.p|PACid:30214178	1.6326	3.10071	<.0001	3	Functional enzyme	AT5G42720.1	Glycosyl hydrolase family 17 protein	AT5G42720.1
SDT	4778	Pavir.J20172.1	30266975	Pavir.J20172.1.p|PACid:30266975	1.6427	3.1225	0.0001	9	Functional enzyme	AT3G09270.1	glutathione S-transferase TAU 8	AT3G09270.1
SDT	7517	Pavir.Gb01302.1	30222088	Pavir.Gb01302.1.p|PACid:30222088	1.6709	3.18413	<.0001	2	Functional enzyme	AT3G48280.1	cytochrome P450, family 71, subfamily A, polypeptide 25	AT3G48280.1
SDT	8149	Pavir.Ia02814.1	30213336	Pavir.Ia02814.1.p|PACid:30213336	1.6787	3.20139	<.0001	2	Functional enzyme	AT5G17820.1	Peroxidase superfamily protein	AT5G17820.1
SDT	4542	Pavir.Bb03524.1	30297224	Pavir.Bb03524.1.p|PACid:30297224	1.6982	3.24496	<.0001	6	Functional enzyme	AT4G03140.1	NAD(P)-binding Rossmann-fold superfamily protein	AT4G03140.1
SDT	2824	Pavir.Aa02058.1	30253206	Pavir.Aa02058.1.p|PACid:30253206	1.7158	3.28479	<.0001	10	Functional enzyme	AT2G45550.1	cytochrome P450, family 76, subfamily C, polypeptide 4	AT2G45550.1
SDT	6843	Pavir.Ia01105.1	30210515	Pavir.Ia01105.1.p|PACid:30210515	1.7605	3.38816	0.0034	4	Functional enzyme	AT2G19440.1	O-Glycosyl hydrolases family 17 protein	AT2G19440.1
SDT	9552	Pavir.J06588.1	30202797	Pavir.J06588.1.p|PACid:30202797	1.7624	3.39262	0.0023	2	Functional enzyme	AT3G26330.1	cytochrome P450, family 71, subfamily B, polypeptide 37	AT3G26330.1
SDT	6169	Pavir.Eb00328.1	30311931	Pavir.Eb00328.1.p|PACid:30311931	1.7848	3.44571	0.0028	4	Functional enzyme	AT4G39490.1	cytochrome P450, family 96, subfamily A, polypeptide 10	AT4G39490.1
SDT	470	Pavir.Ea01477.2	30231125	Pavir.Ea01477.2.p|PACid:30231125	1.804	3.49187	<.0001	24	Functional enzyme	AT1G44970.1	Peroxidase superfamily protein	AT1G44970.1
SDT	6214	Pavir.Ea00922.1	30231050	Pavir.Ea00922.1.p|PACid:30231050	1.831	3.55784	0.0008	4	Functional enzyme	AT4G37530.1	Peroxidase superfamily protein	AT4G37530.1
SDT	1339	Pavir.Ia04860.1	30210096	Pavir.Ia04860.1.p|PACid:30210096	1.8317	3.55956	<.0001	25	Functional enzyme	AT2G47730.1	glutathione S-transferase phi 8	AT2G47730.1
SDT	4103	Pavir.Ib00203.1	30238910	Pavir.Ib00203.1.p|PACid:30238910	1.8704	3.65634	<.0001	12	Functional enzyme	AT2G47730.1	glutathione S-transferase phi 8	AT2G47730.1
SDT	6597	Pavir.Ba03692.1	30293021	Pavir.Ba03692.1.p|PACid:30293021	1.8906	3.70789	0.0076	4	Functional enzyme	AT3G03980.1	NAD(P)-binding Rossmann-fold superfamily protein	AT3G03980.1
SDT	7408	Pavir.Fa02143.1	30186405	Pavir.Fa02143.1.p|PACid:30186405	1.9027	3.73912	0.0017	3	Functional enzyme	AT3G48280.1	cytochrome P450, family 71, subfamily A, polypeptide 25	AT3G48280.1
SDT	3809	Pavir.J37309.1	30271745	Pavir.J37309.1.p|PACid:30271745	1.9237	3.79395	0.0034	2	Functional enzyme	AT4G37560.1	Acetamidase/Formamidase family protein	AT4G37560.1
SDT	5265	Pavir.J22570.1	30308575	Pavir.J22570.1.p|PACid:30308575	2.039	4.10961	<.0001	8	Functional enzyme	AT1G10360.1	glutathione S-transferase TAU 18	AT1G10360.1
SDT	7805	Pavir.Ia03286.1	30212283	Pavir.Ia03286.1.p|PACid:30212283	2.0457	4.12874	<.0001	3	Functional enzyme	AT2G46950.1	cytochrome P450, family 709, subfamily B, polypeptide 2	AT2G46950.1
SDT	2864	Pavir.Da00805.1	30193261	Pavir.Da00805.1.p|PACid:30193261	2.0491	4.13848	<.0001	6	Functional enzyme	AT4G20860.1	FAD-binding Berberine family protein	AT4G20860.1
SDT	4835	Pavir.Da00087.1	30194507	Pavir.Da00087.1.p|PACid:30194507	2.1565	4.45832	<.0001	7	Functional enzyme	AT3G20570.1	early nodulin-like protein 9	AT3G20570.1
SDT	2773	Pavir.J34940.1	30244118	Pavir.J34940.1.p|PACid:30244118	2.2267	4.68062	0.0212	3	Functional enzyme	AT3G55040.1	glutathione transferase lambda 2	AT3G55040.1
SDT	2296	Pavir.J24327.1	30256877	Pavir.J24327.1.p|PACid:30256877	2.2583	4.78427	<.0001	11	Functional enzyme	AT1G10370.1	Glutathione S-transferase family protein	AT1G10370.1
SDT	3296	Pavir.Aa02378.1	30253859	Pavir.Aa02378.1.p|PACid:30253859	2.2594	4.78792	0.0135	3	Functional enzyme	AT2G29420.1	glutathione S-transferase tau 7	AT2G29420.1
SDT	1916	Pavir.Ib00352.1	30239823	Pavir.Ib00352.1.p|PACid:30239823	2.2615	4.7949	<.0001	9	Functional enzyme	AT2G47730.1	glutathione S-transferase phi 8	AT2G47730.1
SDT	5122	Pavir.Gb01868.1	30222408	Pavir.Gb01868.1.p|PACid:30222408	2.313	4.96915	0.0251	4	Functional enzyme	AT5G05960.1	Bifunctional inhibitor/lipid-transfer protein/seed storage 2S albumin superfamily protein	AT5G05960.1
SDT	3124	Pavir.Da00810.1	30192346	Pavir.Da00810.1.p|PACid:30192346	2.342	5.07005	<.0001	5	Functional enzyme	AT4G20860.1	FAD-binding Berberine family protein	AT4G20860.1
SDT	9657	Pavir.Fb00096.1	30280545	Pavir.Fb00096.1.p|PACid:30280545	2.3694	5.16726	<.0001	3	Functional enzyme	AT4G13290.1	cytochrome P450, family 71, subfamily A, polypeptide 19	AT4G13290.1
SDT	7143	Pavir.Ib01771.1	30241978	Pavir.Ib01771.1.p|PACid:30241978	2.4715	5.5462	0.0003	3	Functional enzyme	AT2G46950.1	cytochrome P450, family 709, subfamily B, polypeptide 2	AT2G46950.1
SDT	2901	Pavir.Ea02497.1	30228113	Pavir.Ea02497.1.p|PACid:30228113	2.4855	5.60028	<.0001	8	Functional enzyme	AT1G10360.1	glutathione S-transferase TAU 18	AT1G10360.1
SDT	6785	Pavir.J18194.1	30255395	Pavir.J18194.1.p|PACid:30255395	2.704	6.51606	0.0065	2	Functional enzyme	AT5G46940.1	Plant invertase/pectin methylesterase inhibitor superfamily protein	AT5G46940.1
SDT	4887	Pavir.J00683.1	30255035	Pavir.J00683.1.p|PACid:30255035	2.7164	6.57231	<.0001	7	Functional enzyme	AT5G05960.1	Bifunctional inhibitor/lipid-transfer protein/seed storage 2S albumin superfamily protein	AT5G05960.1
SDT	8832	Pavir.Ea01938.1	30226534	Pavir.Ea01938.1.p|PACid:30226534	2.7173	6.57641	<.0001	2	Functional enzyme	AT1G10370.1	Glutathione S-transferase family protein	AT1G10370.1
SDT	5238	Pavir.Ea03391.1	30231527	Pavir.Ea03391.1.p|PACid:30231527	2.9114	7.52348	<.0001	5	Functional enzyme	AT5G05960.1	Bifunctional inhibitor/lipid-transfer protein/seed storage 2S albumin superfamily protein	AT5G05960.1
SDT	4209	Pavir.J15786.1	30195529	Pavir.J15786.1.p|PACid:30195529	3.0146	8.08137	<.0001	5	Functional enzyme	AT1G71695.1	Peroxidase superfamily protein	AT1G71695.1
SDT	737	Pavir.Ib01540.1	30237822	Pavir.Ib01540.1.p|PACid:30237822	2.2618	4.79589	<.0001	25	Glycolysis	AT3G08590.1	Phosphoglycerate mutase, 2,3-bisphosphoglycerate-independent	AT3G08590.1
SDT	6309	Pavir.J15479.1	30208673	Pavir.J15479.1.p|PACid:30208673	2.4943	5.63455	<.0001	7	Glycolysis	AT5G47810.1	phosphofructokinase 2	AT5G47810.1
SDT	4034	Pavir.Ab02053.1	30235451	Pavir.Ab02053.1.p|PACid:30235451	1.3601	2.56703	<.0001	8	Lipids metabolism	AT1G47480.1	alpha/beta-Hydrolases superfamily protein	AT1G47480.1
SDT	2692	Pavir.Fb00434.1	30279270	Pavir.Fb00434.1.p|PACid:30279270	1.4208	2.67734	0.0002	8	Lipids metabolism	AT1G31812.1	acyl-CoA-binding protein 6	AT1G31812.1
SDT	2328	Pavir.Fa02106.2	30188726	Pavir.Fa02106.2.p|PACid:30188726	1.6048	3.04154	<.0001	16	Lipids metabolism	AT1G31812.1	acyl-CoA-binding protein 6	AT1G31812.1
SDT	3862	Pavir.J39006.1	30207355	Pavir.J39006.1.p|PACid:30207355	1.6831	3.21117	0.0193	2	Lipids metabolism	AT3G15730.1	phospholipase D alpha 1	AT3G15730.1
SDT	4735	Pavir.J14732.1	30273128	Pavir.J14732.1.p|PACid:30273128	1.7092	3.26979	0.0011	3	Lipids metabolism	AT3G15730.1	phospholipase D alpha 1	AT3G15730.1
SDT	5536	Pavir.Hb00235.1	30265462	Pavir.Hb00235.1.p|PACid:30265462	1.7984	3.47834	0.0127	3	Lipids metabolism	AT3G57650.1	lysophosphatidyl acyltransferase 2	AT3G57650.1
SDT	2719	Pavir.Db02396.1	30260752	Pavir.Db02396.1.p|PACid:30260752	1.8551	3.61777	<.0001	16	Lipids metabolism	AT1G31812.1	acyl-CoA-binding protein 6	AT1G31812.1
SDT	4282	Pavir.Fb02232.1	30278475	Pavir.Fb02232.1.p|PACid:30278475	2.1409	4.41037	<.0001	10	Lipids metabolism	AT4G33790.1	Jojoba acyl CoA reductase-related male sterility protein	AT4G33790.1
SDT	3601	Pavir.Da02371.1	30192897	Pavir.Da02371.1.p|PACid:30192897	2.2759	4.843	<.0001	12	Lipids metabolism	AT1G31812.1	acyl-CoA-binding protein 6	AT1G31812.1
SDT	2575	Pavir.J37748.1	30220994	Pavir.J37748.1.p|PACid:30220994	1.3386	2.52906	<.0001	16	Major CHO metabolism	AT3G46970.1	alpha-glucan phosphorylase 2	AT3G46970.1
SDT	7732	Pavir.J21013.1	30285910	Pavir.J21013.1.p|PACid:30285910	1.4116	2.66032	0.0289	2	Major CHO metabolism	AT1G73370.1	sucrose synthase 6	AT1G73370.1
SDT	2806	Pavir.J10133.1	30243454	Pavir.J10133.1.p|PACid:30243454	1.4679	2.76619	0.0006	5	Major CHO metabolism	AT5G48300.1	ADP glucose pyrophosphorylase 1	AT5G48300.1
SDT	7902	Pavir.Ab02990.1	30232104	Pavir.Ab02990.1.p|PACid:30232104	1.5627	2.95406	0.0032	3	Major CHO metabolism	AT3G01180.1	starch synthase 2	AT3G01180.1
SDT	1190	Pavir.Ia03415.1	30214719	Pavir.Ia03415.1.p|PACid:30214719	1.702	3.25352	<.0001	31	Major CHO metabolism	AT4G02280.1	sucrose synthase 3	AT4G02280.1
SDT	4331	Pavir.J15987.1	30244300	Pavir.J15987.1.p|PACid:30244300	1.7126	3.27751	<.0001	9	Major CHO metabolism	AT3G29320.1	Glycosyl transferase, family 35	AT3G29320.1
SDT	2902	Pavir.J18850.1	30199531	Pavir.J18850.1.p|PACid:30199531	1.7283	3.31337	<.0001	5	Major CHO metabolism	AT5G48300.1	ADP glucose pyrophosphorylase 1	AT5G48300.1
SDT	5996	Pavir.Ia04422.1	30209865	Pavir.Ia04422.1.p|PACid:30209865	1.8317	3.55956	<.0001	5	Major CHO metabolism	AT3G23920.1	beta-amylase 1	AT3G23920.1
SDT	1784	Pavir.J01199.1	30263609	Pavir.J01199.1.p|PACid:30263609	1.9922	3.97843	<.0001	27	Major CHO metabolism	AT5G03650.1	starch branching enzyme 2.2	AT5G03650.1
SDT	2792	Pavir.J01866.1	30284124	Pavir.J01866.1.p|PACid:30284124	1.9935	3.98202	0.0073	2	Major CHO metabolism	AT1G73370.1	sucrose synthase 6	AT1G73370.1
SDT	6724	Pavir.J16232.1	30287340	Pavir.J16232.1.p|PACid:30287340	2.14	4.40762	<.0001	3	Major CHO metabolism	AT3G23920.1	beta-amylase 1	AT3G23920.1
SDT	1131	Pavir.Fb00791.1	30280037	Pavir.Fb00791.1.p|PACid:30280037	2.2656	4.80854	<.0001	17	Major CHO metabolism	AT5G48300.1	ADP glucose pyrophosphorylase 1	AT5G48300.1
SDT	6821	Pavir.Ib01597.1	30237846	Pavir.Ib01597.1.p|PACid:30237846	2.2788	4.85274	<.0001	8	Major CHO metabolism	AT4G02280.1	sucrose synthase 3	AT4G02280.1
SDT	5731	Pavir.Ea01371.1	30230510	Pavir.Ea01371.1.p|PACid:30230510	1.5043	2.83687	0.0016	5	Metal binding	AT1G71050.1	Heavy metal transport/detoxification superfamily protein	AT1G71050.1
SDT	8258	Pavir.Eb00100.1	30309519	Pavir.Eb00100.1.p|PACid:30309519	1.8551	3.61777	<.0001	2	Metal binding	AT3G15353.1	metallothionein 3	AT3G15353.1
SDT	5412	Pavir.Eb00738.1	30313756	Pavir.Eb00738.1.p|PACid:30313756	2.0514	4.14508	<.0001	4	Metal binding	AT3G09390.1	metallothionein 2A	AT3G09390.1
SDT	1732	Pavir.J25812.1	30220787	Pavir.J25812.1.p|PACid:30220787	1.5149	2.85779	<.0001	17	Minor CHO metabolism	AT2G37770.2	NAD(P)-linked oxidoreductase superfamily protein	AT2G37770.2
SDT	5138	Pavir.Ea00408.1	30226809	Pavir.Ea00408.1.p|PACid:30226809	1.6413	3.11947	<.0001	6	Minor CHO metabolism	AT5G40390.1	Raffinose synthase family protein	AT5G40390.1
SDT	4329	Pavir.J40731.1	30255060	Pavir.J40731.1.p|PACid:30255060	1.6582	3.15622	0.0012	5	Minor CHO metabolism	AT2G47180.1	galactinol synthase 1	AT2G47180.1
SDT	7578	Pavir.Hb00199.1	30264691	Pavir.Hb00199.1.p|PACid:30264691	1.8769	3.67285	0.0014	3	Minor CHO metabolism	AT4G01970.1	stachyose synthase	AT4G01970.1
SDT	3998	Pavir.J15860.1	30275456	Pavir.J15860.1.p|PACid:30275456	2.5283	5.76891	<.0001	14	Minor CHO metabolism	AT2G37770.2	NAD(P)-linked oxidoreductase superfamily protein	AT2G37770.2
SDT	3556	Pavir.J34655.1	30270543	Pavir.J34655.1.p|PACid:30270543	2.5885	6.01473	0.0003	2	Minor CHO metabolism	AT2G37770.2	NAD(P)-linked oxidoreductase superfamily protein	AT2G37770.2
SDT	4529	Pavir.Ea02163.1	30231351	Pavir.Ea02163.1.p|PACid:30231351	-1.437	0.369335	<.0001	6	Mitochondrial electron transport / ATP synthesis	AT3G15640.1	Rubredoxin-like superfamily protein	AT3G15640.1
SDT	1195	Pavir.Eb01334.1	30314306	Pavir.Eb01334.1.p|PACid:30314306	1.3535	2.55531	<.0001	6	Mitochondrial electron transport / ATP synthesis	AT3G12260.1	LYR family of Fe/S cluster biogenesis protein	AT3G12260.1
SDT	3644	Pavir.J00971.1	30301823	Pavir.J00971.1.p|PACid:30301823	1.3557	2.55921	<.0001	11	Mitochondrial electron transport / ATP synthesis	AT4G34700.1	LYR family of Fe/S cluster biogenesis protein	AT4G34700.1
SDT	4432	Pavir.J16145.1	30301857	Pavir.J16145.1.p|PACid:30301857	1.3634	2.57291	<.0001	10	Mitochondrial electron transport / ATP synthesis	AT3G18410.1	Complex I subunit NDUFS6	AT3G18410.1
SDT	1641	Pavir.Ab02836.1	30234992	Pavir.Ab02836.1.p|PACid:30234992	1.402	2.64268	<.0001	18	Mitochondrial electron transport / ATP synthesis	AT5G13450.1	delta subunit of Mt ATP synthase	AT5G13450.1
SDT	5016	Pavir.Ib00181.1	30239939	Pavir.Ib00181.1.p|PACid:30239939	1.4594	2.74994	<.0001	9	Mitochondrial electron transport / ATP synthesis	AT2G02050.1	NADH-ubiquinone oxidoreductase B18 subunit, putative	AT2G02050.1
SDT	4401	Pavir.Db00344.1	30262438	Pavir.Db00344.1.p|PACid:30262438	1.4683	2.76696	<.0001	9	Mitochondrial electron transport / ATP synthesis	AT4G05020.1	NAD(P)H dehydrogenase B2	AT4G05020.1
SDT	7903	Pavir.J08720.1	30295101	Pavir.J08720.1.p|PACid:30295101	1.5784	2.98638	0.0449	3	Mitochondrial electron transport / ATP synthesis	AT1G22450.1	cytochrome C oxidase 6B	AT1G22450.1
SDT	1700	Pavir.Fa00648.1	30186795	Pavir.Fa00648.1.p|PACid:30186795	2.0656	4.18608	<.0001	9	Mitochondrial electron transport / ATP synthesis	AT3G52300.1	ATP synthase D chain, mitochondrial	AT3G52300.1
SDT	3142	Pavir.Aa00791.1	30250648	Pavir.Aa00791.1.p|PACid:30250648	2.2384	4.71873	<.0001	8	Mitochondrial electron transport / ATP synthesis	AT5G13450.1	delta subunit of Mt ATP synthase	AT5G13450.1
SDT	6973	Pavir.J10328.1	30314966	Pavir.J10328.1.p|PACid:30314966	2.5012	5.66156	0.0005	4	Mitochondrial electron transport / ATP synthesis	AT1G15120.2	Ubiquinol-cytochrome C reductase hinge protein	AT1G15120.2
SDT	5165	Pavir.Gb00236.1	30221953	Pavir.Gb00236.1.p|PACid:30221953	-1.7726	0.292681	0.0012	4	Nucleotide metabolism	AT4G04955.1	allantoinase	AT4G04955.1
SDT	3711	Pavir.J15793.1	30248019	Pavir.J15793.1.p|PACid:30248019	1.6882	3.22254	<.0001	13	Nucleotide metabolism	AT5G18280.1	apyrase 2	AT5G18280.1
SDT	4814	Pavir.Hb01541.1	30265915	Pavir.Hb01541.1.p|PACid:30265915	2.3571	5.12339	0.001	4	Nucleotide metabolism	AT5G18280.2	apyrase 2	AT5G18280.2
SDT	9034	Pavir.J27939.1	30197086	Pavir.J27939.1.p|PACid:30197086	2.3971	5.26743	0.0454	2	Nucleotide metabolism	AT5G28050.1	Cytidine/deoxycytidylate deaminase family protein	AT5G28050.1
SDT	3065	Pavir.Hb01709.1	30264668	Pavir.Hb01709.1.p|PACid:30264668	-1.9838	0.252823	0.0305	2	Phyto-hormone metabolism	AT1G77690.1	like AUX1 3	AT1G77690.1
SDT	1638	Pavir.Ea01573.1	30227608	Pavir.Ea01573.1.p|PACid:30227608	-1.5167	0.349484	<.0001	19	Phyto-hormone metabolism	AT2G19590.1	ACC oxidase 1	AT2G19590.1
SDT	1626	Pavir.J04199.1	30198046	Pavir.J04199.1.p|PACid:30198046	-1.4304	0.371028	0.0335	2	Phyto-hormone metabolism	AT1G05680.1	Uridine diphosphate glycosyltransferase 74E2	AT1G05680.1
SDT	7145	Pavir.Ga01023.1	30302722	Pavir.Ga01023.1.p|PACid:30302722	-1.4272	0.371852	0.0142	2	Phyto-hormone metabolism	AT1G76270.1	O-fucosyltransferase family protein	AT1G76270.1
SDT	1643	Pavir.J10323.1	30190884	Pavir.J10323.1.p|PACid:30190884	-1.3225	0.399841	<.0001	12	Phyto-hormone metabolism	AT2G19590.1	ACC oxidase 1	AT2G19590.1
SDT	1341	Pavir.J08202.1	30208198	Pavir.J08202.1.p|PACid:30208198	1.3314	2.51647	<.0001	9	Phyto-hormone metabolism	AT3G50660.1	Cytochrome P450 superfamily protein	AT3G50660.1
SDT	1214	Pavir.J37193.1	30197386	Pavir.J37193.1.p|PACid:30197386	1.3763	2.59602	<.0001	16	Phyto-hormone metabolism	AT3G22400.1	PLAT/LH2 domain-containing lipoxygenase family protein	AT3G22400.1
SDT	6028	Pavir.Da02114.1	30193118	Pavir.Da02114.1.p|PACid:30193118	1.4729	2.77579	<.0001	3	Phyto-hormone metabolism	AT5G20400.1	2-oxoglutarate (2OG) and Fe(II)-dependent oxygenase superfamily protein	AT5G20400.1
SDT	7202	Pavir.Db00930.1	30259971	Pavir.Db00930.1.p|PACid:30259971	1.5094	2.84692	<.0001	2	Phyto-hormone metabolism	AT1G74520.1	HVA22 homologue A	AT1G74520.1
SDT	6921	Pavir.J04587.1	30199796	Pavir.J04587.1.p|PACid:30199796	1.5598	2.94813	<.0001	7	Phyto-hormone metabolism	AT5G20550.1	2-oxoglutarate (2OG) and Fe(II)-dependent oxygenase superfamily protein	AT5G20550.1
SDT	716	Pavir.Ca02189.1	30206971	Pavir.Ca02189.1.p|PACid:30206971	1.6449	3.12726	<.0001	34	Phyto-hormone metabolism	AT5G13200.1	GRAM domain family protein	AT5G13200.1
SDT	2017	Pavir.J01160.1	30306248	Pavir.J01160.1.p|PACid:30306248	1.8565	3.62128	<.0001	28	Phyto-hormone metabolism	AT3G22850.1	Aluminium induced protein with YGL and LRDR motifs	AT3G22850.1
SDT	157	Pavir.J00130.1	30200135	Pavir.J00130.1.p|PACid:30200135	1.8756	3.66954	<.0001	12	Phyto-hormone metabolism	AT1G60730.1	NAD(P)-linked oxidoreductase superfamily protein	AT1G60730.1
SDT	4986	Pavir.Ca02100.1	30204177	Pavir.Ca02100.1.p|PACid:30204177	2.0886	4.25335	<.0001	8	Phyto-hormone metabolism	AT3G22400.1	PLAT/LH2 domain-containing lipoxygenase family protein	AT3G22400.1
SDT	8374	Pavir.J06494.1	30286195	Pavir.J06494.1.p|PACid:30286195	2.4839	5.59408	0.0007	3	Phyto-hormone metabolism	AT2G14900.1	Gibberellin-regulated family protein	AT2G14900.1
SDT	8888	Pavir.Ea00295.1	30226575	Pavir.Ea00295.1.p|PACid:30226575	2.9245	7.59211	0.0188	2	Phyto-hormone metabolism	AT1G03400.1	2-oxoglutarate (2OG) and Fe(II)-dependent oxygenase superfamily protein	AT1G03400.1
SDT	1771	Pavir.Da00120.1	30194276	Pavir.Da00120.1.p|PACid:30194276	-1.6373	0.321458	<.0001	11	Protein degradation	AT5G43060.1	Granulin repeat cysteine protease family protein	AT5G43060.1
SDT	4327	Pavir.J12532.1	30245869	Pavir.J12532.1.p|PACid:30245869	1.3584	2.56401	<.0001	10	Protein degradation	AT1G03220.1	Eukaryotic aspartyl protease family protein	AT1G03220.1
SDT	695	Pavir.Eb01124.1	30311582	Pavir.Eb01124.1.p|PACid:30311582	1.377	2.59728	<.0001	32	Protein degradation	AT3G12490.2	cystatin B	AT3G12490.2
SDT	5584	Pavir.J00078.1	30197317	Pavir.J00078.1.p|PACid:30197317	1.3834	2.60882	0.0006	6	Protein degradation	AT3G12490.2	cystatin B	AT3G12490.2
SDT	7207	Pavir.Ab02941.1	30233125	Pavir.Ab02941.1.p|PACid:30233125	1.4358	2.70532	0.0009	2	Protein degradation	AT1G73990.1	signal peptide peptidase	AT1G73990.1
SDT	6953	Pavir.Db02273.1	30261964	Pavir.Db02273.1.p|PACid:30261964	1.4404	2.71396	0.0007	4	Protein degradation	AT1G12410.1	CLP protease proteolytic subunit 2	AT1G12410.1
SDT	5215	Pavir.J19331.1	30189559	Pavir.J19331.1.p|PACid:30189559	1.4544	2.74043	0.0228	6	Protein degradation	AT2G14260.1	proline iminopeptidase	AT2G14260.1
SDT	4151	Pavir.Bb01503.1	30300143	Pavir.Bb01503.1.p|PACid:30300143	1.5829	2.99571	<.0001	8	Protein degradation	AT2G22980.1	serine carboxypeptidase-like 13	AT2G22980.1
SDT	4430	Pavir.Eb03276.1	30312971	Pavir.Eb03276.1.p|PACid:30312971	1.8077	3.50084	<.0001	9	Protein degradation	AT5G65760.1	Serine carboxypeptidase S28 family protein	AT5G65760.1
SDT	6466	Pavir.J02259.1	30306347	Pavir.J02259.1.p|PACid:30306347	1.9521	3.86937	<.0001	4	Protein degradation	AT3G12490.2	cystatin B	AT3G12490.2
SDT	1184	Pavir.Gb02161.1	30221760	Pavir.Gb02161.1.p|PACid:30221760	2.0179	4.04994	<.0001	6	Protein degradation	AT1G03230.1	Eukaryotic aspartyl protease family protein	AT1G03230.1
SDT	5123	Pavir.J20242.1	30185156	Pavir.J20242.1.p|PACid:30185156	2.4375	5.41702	<.0001	3	Protein degradation	AT3G12700.2	Eukaryotic aspartyl protease family protein	AT3G12700.2
SDT	2079	Pavir.Ea00101.1	30231090	Pavir.Ea00101.1.p|PACid:30231090	2.8144	7.03427	<.0001	8	Protein degradation	AT1G64110.3	P-loop containing nucleoside triphosphate hydrolases superfamily protein	AT1G64110.3
SDT	6478	Pavir.Gb02365.1	30224154	Pavir.Gb02365.1.p|PACid:30224154	1.5313	2.89046	<.0001	3	Protein modification	AT5G58140.4	phototropin 2	AT5G58140.4
SDT	6707	Pavir.Ib03607.1	30238969	Pavir.Ib03607.1.p|PACid:30238969	-1.4402	0.368516	<.0001	4	Protein synthesis	AT1G07210.1	Ribosomal protein S18	AT1G07210.1
SDT	9726	Pavir.J05050.1	30219373	Pavir.J05050.1.p|PACid:30219373	1.3317	2.51699	0.0105	2	Protein synthesis	AT1G63780.1	Ribosomal RNA processing Brix domain protein	AT1G63780.1
SDT	5725	Pavir.Ba00199.1	30289126	Pavir.Ba00199.1.p|PACid:30289126	1.3441	2.53872	0.0004	6	Protein synthesis	AT4G15770.1	RNA binding	AT4G15770.1
SDT	7213	Pavir.Ea02335.1	30231084	Pavir.Ea02335.1.p|PACid:30231084	1.3882	2.61752	0.0018	5	Protein synthesis	AT3G27830.1	ribosomal protein L12-A	AT3G27830.1
SDT	2607	Pavir.J20711.1	30273859	Pavir.J20711.1.p|PACid:30273859	1.49	2.80889	0.0003	9	Protein synthesis	AT1G08360.1	Ribosomal protein L1p/L10e family	AT1G08360.1
SDT	4128	Pavir.Aa00928.1	30251755	Pavir.Aa00928.1.p|PACid:30251755	1.4703	2.7708	0.0002	5	Protein targeting & vesicle tansport	AT1G61570.1	translocase of the inner mitochondrial membrane 13	AT1G61570.1
SDT	3967	Pavir.J08185.1	30185137	Pavir.J08185.1.p|PACid:30185137	1.8471	3.59776	<.0001	14	Protein targeting & vesicle tansport	AT4G16160.2	Mitochondrial import inner membrane translocase subunit Tim17/Tim22/Tim23 family protein	AT4G16160.2
SDT	4413	Pavir.Hb01464.1	30264995	Pavir.Hb01464.1.p|PACid:30264995	2.3043	4.93928	0.0418	2	Protein targeting & vesicle tansport	AT5G61970.1	signal recognition particle-related / SRP-related	AT5G61970.1
SDT	8895	Pavir.Fb00693.1	30280576	Pavir.Fb00693.1.p|PACid:30280576	2.578	5.97111	0.0105	2	Protein targeting & vesicle tansport	AT5G50810.1	translocase inner membrane subunit 8	AT5G50810.1
SDT	3264	Pavir.J11658.1	30207612	Pavir.J11658.1.p|PACid:30207612	2.6395	6.23116	<.0001	2	Protein targeting & vesicle tansport	AT4G16160.2	Mitochondrial import inner membrane translocase subunit Tim17/Tim22/Tim23 family protein	AT4G16160.2
SDT	6046	Pavir.Ca00307.1	30204835	Pavir.Ca00307.1.p|PACid:30204835	1.3818	2.60593	0.0092	3	Redox balance	AT5G48810.1	cytochrome B5 isoform D	AT5G48810.1
SDT	5468	Pavir.J01114.2	30201996	Pavir.J01114.2.p|PACid:30201996	1.438	2.70945	<.0001	7	Redox balance	AT2G16060.1	hemoglobin 1	AT2G16060.1
SDT	2632	Pavir.Eb04045.1	30311250	Pavir.Eb04045.1.p|PACid:30311250	1.5248	2.87747	<.0001	11	Redox balance	AT2G32720.1	cytochrome B5 isoform B	AT2G32720.1
SDT	1511	Pavir.J14815.1	30198480	Pavir.J14815.1.p|PACid:30198480	1.5537	2.93569	<.0001	6	Redox balance	AT3G10920.1	manganese superoxide dismutase 1	AT3G10920.1
SDT	5171	Pavir.J14234.1	30236731	Pavir.J14234.1.p|PACid:30236731	1.5804	2.99053	<.0001	6	Redox balance	AT3G26060.1	Thioredoxin superfamily protein	AT3G26060.1
SDT	4365	Pavir.Gb02261.1	30223273	Pavir.Gb02261.1.p|PACid:30223273	1.5988	3.02891	<.0001	13	Redox balance	AT4G35000.1	ascorbate peroxidase 3	AT4G35000.1
SDT	1475	Pavir.Gb01642.1	30222355	Pavir.Gb01642.1.p|PACid:30222355	1.6718	3.18612	0.0306	4	Redox balance	AT4G08390.1	stromal ascorbate peroxidase	AT4G08390.1
SDT	8253	Pavir.Da01876.1	30194692	Pavir.Da01876.1.p|PACid:30194692	1.7285	3.31383	0.0042	3	Redox balance	AT2G25080.1	glutathione peroxidase 1	AT2G25080.1
SDT	6249	Pavir.Ab02318.1	30235492	Pavir.Ab02318.1.p|PACid:30235492	1.7916	3.46199	0.002	4	Redox balance	AT5G40370.1	Glutaredoxin family protein	AT5G40370.1
SDT	5104	Pavir.J36356.1	30257261	Pavir.J36356.1.p|PACid:30257261	1.8136	3.51518	0.0005	4	Redox balance	AT2G48150.1	glutathione peroxidase 4	AT2G48150.1
SDT	1309	Pavir.J14586.1	30254928	Pavir.J14586.1.p|PACid:30254928	1.8701	3.65558	0.0007	6	Redox balance	AT1G20630.1	catalase 1	AT1G20630.1
SDT	7031	Pavir.J05134.1	30296320	Pavir.J05134.1.p|PACid:30296320	-2.3138	0.20113	0.0121	2	Regulation of transcription	AT1G58100.1	TCP family transcription factor	AT1G58100.1
SDT	7808	Pavir.Ib01055.1	30240574	Pavir.Ib01055.1.p|PACid:30240574	-1.319	0.400813	0.0143	3	Regulation of transcription	AT4G39250.1	RAD-like 1	AT4G39250.1
SDT	2949	Pavir.J23625.1	30257820	Pavir.J23625.1.p|PACid:30257820	1.5183	2.86453	<.0001	22	Regulation of transcription	AT1G73030.1	SNF7 family protein	AT1G73030.1
SDT	2077	Pavir.Ib00113.1	30241122	Pavir.Ib00113.1.p|PACid:30241122	1.63071	3.09665	<.0001	24	Regulation of transcription	AT5G23750.2	Remorin family protein	AT5G23750.2
SDT	3617	Pavir.Ia04780.1	30214361	Pavir.Ia04780.1.p|PACid:30214361	1.774	3.42001	<.0001	12	Regulation of transcription	AT3G61260.1	Remorin family protein	AT3G61260.1
SDT	2718	Pavir.Ia04404.1	30211920	Pavir.Ia04404.1.p|PACid:30211920	2.3838	5.2191	<.0001	7	Regulation of transcription	AT5G42290.1	transcription activator-related	AT5G42290.1
SDT	4041	Pavir.Ab03210.1	30233866	Pavir.Ab03210.1.p|PACid:30233866	2.529	5.77171	<.0001	11	Regulation of transcription	AT5G23750.1	Remorin family protein	AT5G23750.1
SDT	5367	Pavir.Ab00122.1	30236482	Pavir.Ab00122.1.p|PACid:30236482	1.5148	2.85759	<.0001	7	RNA processing	AT2G18740.1	Small nuclear ribonucleoprotein family protein	AT2G18740.1
SDT	5263	Pavir.Ia00088.1	30209179	Pavir.Ia00088.1.p|PACid:30209179	1.7115	3.27501	<.0001	5	RNA processing	AT1G24450.1	Ribonuclease III family protein	AT1G24450.1
SDT	2763	Pavir.Bb02672.1	30301689	Pavir.Bb02672.1.p|PACid:30301689	1.9337	3.82034	0.0004	5	RNA processing	AT1G14220.1	Ribonuclease T2 family protein	AT1G14220.1
SDT	2412	Pavir.Ba01215.1	30290531	Pavir.Ba01215.1.p|PACid:30290531	3.7349	13.3143	<.0001	7	RNA processing	AT1G14220.1	Ribonuclease T2 family protein	AT1G14220.1
SDT	3965	Pavir.Cb00701.1	30268632	Pavir.Cb00701.1.p|PACid:30268632	-1.8231	0.282613	0.0001	5	S-assimilation	AT3G01910.1	sulfite oxidase	AT3G01910.1
SDT	4617	Pavir.J21571.1	30208099	Pavir.J21571.1.p|PACid:30208099	-1.4836	0.357595	<.0001	9	Secondary metabolism	AT5G13930.1	Chalcone and stilbene synthase family protein	AT5G13930.1
SDT	4157	Pavir.Bb01875.1	30297231	Pavir.Bb01875.1.p|PACid:30297231	1.5108	2.84968	<.0001	11	Secondary metabolism	AT4G37980.1	elicitor-activated gene 3-1	AT4G37980.1
SDT	5194	Pavir.Ea03286.1	30226410	Pavir.Ea03286.1.p|PACid:30226410	1.5622	2.95304	<.0001	9	Secondary metabolism	AT5G58490.1	NAD(P)-binding Rossmann-fold superfamily protein	AT5G58490.1
SDT	7070	Pavir.Ib02593.1	30240794	Pavir.Ib02593.1.p|PACid:30240794	1.5647	2.95816	0.0035	3	Secondary metabolism	AT3G21420.1	2-oxoglutarate (2OG) and Fe(II)-dependent oxygenase superfamily protein	AT3G21420.1
SDT	1548	Pavir.Hb00577.1	30265158	Pavir.Hb00577.1.p|PACid:30265158	1.7059	3.26232	0.0006	6	Secondary metabolism	AT4G01070.1	UDP-Glycosyltransferase superfamily protein	AT4G01070.1
SDT	7924	Pavir.Aa02320.1	30253135	Pavir.Aa02320.1.p|PACid:30253135	1.729	3.31498	0.0008	3	Secondary metabolism	AT5G23960.1	terpene synthase 21	AT5G23960.1
SDT	3625	Pavir.Aa01510.1	30250971	Pavir.Aa01510.1.p|PACid:30250971	1.7542	3.37339	<.0001	11	Secondary metabolism	AT5G13930.1	Chalcone and stilbene synthase family protein	AT5G13930.1
SDT	3012	Pavir.J25822.1	30306743	Pavir.J25822.1.p|PACid:30306743	-1.3275	0.398458	<.0001	7	Signaling regulation	AT1G74690.1	IQ-domain 31	AT1G74690.1
SDT	7190	Pavir.Ca00081.1	30206159	Pavir.Ca00081.1.p|PACid:30206159	1.3242	2.50394	0.0002	4	Signaling regulation	AT2G36570.1	Leucine-rich repeat protein kinase family protein	AT2G36570.1
SDT	5100	Pavir.Ba00312.1	30290372	Pavir.Ba00312.1.p|PACid:30290372	1.3306	2.51507	<.0001	7	Signaling regulation	AT2G40116.1	Phosphoinositide-specific phospholipase C family protein	AT2G40116.1
SDT	2200	Pavir.Bb00649.1	30297474	Pavir.Bb00649.1.p|PACid:30297474	1.358	2.5633	0.0046	5	Signaling regulation	AT3G09900.1	RAB GTPase homolog E1E	AT3G09900.1
SDT	5356	Pavir.Eb00944.1	30309163	Pavir.Eb00944.1.p|PACid:30309163	1.364	2.57398	<.0001	7	Signaling regulation	AT4G15800.1	ralf-like 33	AT4G15800.1
SDT	6747	Pavir.Bb03618.1	30300930	Pavir.Bb03618.1.p|PACid:30300930	1.389	2.61897	<.0001	3	Signaling regulation	AT4G15800.1	ralf-like 33	AT4G15800.1
SDT	4535	Pavir.J33239.1	30208709	Pavir.J33239.1.p|PACid:30208709	1.4874	2.80383	<.0001	6	Signaling regulation	AT5G58670.1	phospholipase C1	AT5G58670.1
SDT	6012	Pavir.Ga01034.1	30303545	Pavir.Ga01034.1.p|PACid:30303545	1.5273	2.88246	0.0038	2	Signaling regulation	AT1G76040.2	calcium-dependent protein kinase 29	AT1G76040.2
SDT	1218	Pavir.Ea00909.1	30227652	Pavir.Ea00909.1.p|PACid:30227652	1.5399	2.90774	0.0083	6	Signaling regulation	AT4G02080.1	secretion-associated RAS super family 2	AT4G02080.1
SDT	8468	Pavir.Cb00876.1	30269914	Pavir.Cb00876.1.p|PACid:30269914	1.6754	3.19408	0.0156	3	Signaling regulation	AT3G05490.1	ralf-like 22	AT3G05490.1
SDT	8550	Pavir.Ba02020.1	30289660	Pavir.Ba02020.1.p|PACid:30289660	1.685	3.2154	0.0018	2	Signaling regulation	AT4G14640.1	calmodulin 8	AT4G14640.1
SDT	2737	Pavir.Fb01354.1	30279620	Pavir.Fb01354.1.p|PACid:30279620	1.7143	3.28137	<.0001	11	Signaling regulation	AT2G33380.1	Caleosin-related family protein	AT2G33380.1
SDT	4068	Pavir.Ea01561.1	30227923	Pavir.Ea01561.1.p|PACid:30227923	1.7239	3.30328	<.0001	12	Signaling regulation	AT4G23180.1	cysteine-rich RLK (RECEPTOR-like protein kinase) 10	AT4G23180.1
SDT	7785	Pavir.Ga00721.1	30303027	Pavir.Ga00721.1.p|PACid:30303027	1.8909	3.70867	<.0001	2	Signaling regulation	AT1G64850.1	Calcium-binding EF hand family protein	AT1G64850.1
SDT	6427	Pavir.Ib02894.1	30237124	Pavir.Ib02894.1.p|PACid:30237124	2.0583	4.16495	<.0001	4	Signaling regulation	AT4G38810.2	Calcium-binding EF-hand family protein	AT4G38810.2
SDT	1038	Pavir.Ea00048.1	30230356	Pavir.Ea00048.1.p|PACid:30230356	2.1837	4.54317	<.0001	21	Signaling regulation	AT4G20260.5	plasma-membrane associated cation-binding protein 1	AT4G20260.5
SDT	1220	Pavir.Eb00019.1	30314169	Pavir.Eb00019.1.p|PACid:30314169	2.3431	5.07392	<.0001	17	Signaling regulation	AT4G20260.5	plasma-membrane associated cation-binding protein 1	AT4G20260.5
SDT	1683	Pavir.Db01776.1	30261030	Pavir.Db01776.1.p|PACid:30261030	1.4443	2.72131	<.0001	4	TCA cycle	AT1G24180.1	Thiamin diphosphate-binding fold (THDP-binding) superfamily protein	AT1G24180.1
SDT	1144	Pavir.Ea02983.1	30228167	Pavir.Ea02983.1.p|PACid:30228167	2.5513	5.86162	<.0001	29	TCA cycle	AT1G79750.1	NADP-malic enzyme 4	AT1G79750.1
SDT	239	Pavir.J39847.1	30295683	Pavir.J39847.1.p|PACid:30295683	1.34847	2.54642	<.0001	71	Transport	AT4G28390.1	ADP/ATP carrier 3	AT4G28390.1
SDT	554	Pavir.Ia03902.1	30214976	Pavir.Ia03902.1.p|PACid:30214976	1.3595	2.56596	0.0075	8	Transport	AT4G39080.1	vacuolar proton ATPase A3	AT4G39080.1
SDT	697	Pavir.J23798.1	30218099	Pavir.J23798.1.p|PACid:30218099	1.43256	2.69925	<.0001	49	Transport	AT3G58730.1	vacuolar ATP synthase subunit D (VATD) / V-ATPase D subunit / vacuolar proton pump D subunit (VATPD)	AT3G58730.1
SDT	3201	Pavir.J12114.1	30271222	Pavir.J12114.1.p|PACid:30271222	1.4341	2.70214	<.0001	5	Transport	AT5G57110.1	autoinhibited Ca2+ -ATPase, isoform 8	AT5G57110.1
SDT	205	Pavir.Aa00660.1	30250922	Pavir.Aa00660.1.p|PACid:30250922	1.4873	2.80364	0.0013	5	Transport	AT3G08580.1	ADP/ATP carrier 1	AT3G08580.1
SDT	729	Pavir.Ea02291.1	30229567	Pavir.Ea02291.1.p|PACid:30229567	1.5758	2.98101	0.0317	3	Transport	AT1G64200.1	vacuolar H+-ATPase subunit E isoform 3	AT1G64200.1
SDT	7441	Pavir.Bb00286.1	30297760	Pavir.Bb00286.1.p|PACid:30297760	1.6628	3.1663	0.0363	3	Transport	AT1G30220.1	inositol transporter 2	AT1G30220.1
SDT	7956	Pavir.J33575.1	30199512	Pavir.J33575.1.p|PACid:30199512	1.6637	3.16828	<.0001	2	Transport	AT1G67300.1	Major facilitator superfamily protein	AT1G67300.1
SDT	2228	Pavir.Eb02835.1	30314125	Pavir.Eb02835.1.p|PACid:30314125	1.7411	3.3429	<.0001	8	Transport	AT2G47000.1	ATP binding cassette subfamily B4	AT2G47000.1
SDT	3596	Pavir.Bb02900.1	30301417	Pavir.Bb02900.1.p|PACid:30301417	1.7654	3.39968	0.0245	3	Transport	AT3G42050.1	vacuolar ATP synthase subunit H family protein	AT3G42050.1
SDT	4943	Pavir.Gb02010.1	30222072	Pavir.Gb02010.1.p|PACid:30222072	1.9971	3.99197	<.0001	6	Transport	AT5G66110.1	Heavy metal transport/detoxification superfamily protein	AT5G66110.1
SDT	607	Pavir.Bb00689.1	30298226	Pavir.Bb00689.1.p|PACid:30298226	2.0189	4.05275	<.0001	4	Transport	AT3G01390.1	vacuolar membrane ATPase 10	AT3G01390.1
SDT	3677	Pavir.Ba00708.1	30290880	Pavir.Ba00708.1.p|PACid:30290880	2.0342	4.09596	0.0114	3	Transport	AT3G42050.1	vacuolar ATP synthase subunit H family protein	AT3G42050.1
SDT	3731	Pavir.Ab02274.1	30236541	Pavir.Ab02274.1.p|PACid:30236541	2.0524	4.14795	0.0031	4	Transport	AT5G58070.1	temperature-induced lipocalin	AT5G58070.1
SDT	377	Pavir.Ia00950.1	30212938	Pavir.Ia00950.1.p|PACid:30212938	2.0785	4.22368	<.0001	6	Transport	AT5G62670.1	H(+)-ATPase 11	AT5G62670.1
SDT	6349	Pavir.Ab01809.1	30232311	Pavir.Ab01809.1.p|PACid:30232311	2.1827	4.54002	0.0022	5	Transport	AT5G04750.1	F1F0-ATPase inhibitor protein, putative	AT5G04750.1
SDT	5318	Pavir.J11011.1	30288148	Pavir.J11011.1.p|PACid:30288148	2.3167	4.98191	0.0483	3	Transport	AT2G37360.1	ABC-2 type transporter family protein	AT2G37360.1
SDT	3060	Pavir.Aa01363.1	30251544	Pavir.Aa01363.1.p|PACid:30251544	2.5932	6.03436	<.0001	5	Transport	AT5G58070.1	temperature-induced lipocalin	AT5G58070.1
SDT	603	Pavir.J08319.1	30216763	Pavir.J08319.1.p|PACid:30216763	2.9907	7.9486	0.0114	3	Transport	AT3G01390.1	vacuolar membrane ATPase 10	AT3G01390.1
SDT	7943	Pavir.J08753.1	30217806	Pavir.J08753.1.p|PACid:30217806	-2.5861	0.166535	0.006	3	Unclassified	AT1G15230.1	N/A	AT1G15230.1
SDT	1778	Pavir.Ga00514.2	30305072	Pavir.Ga00514.2.p|PACid:30305072	-1.5739	0.335899	<.0001	11	Unclassified	AT1G63220.1	Calcium-dependent lipid-binding (CaLB domain) family protein	AT1G63220.1
SDT	9240	Pavir.Ca00408.1	30204561	Pavir.Ca00408.1.p|PACid:30204561	-1.4155	0.37488	0.0107	2	Unclassified	AT3G01810.1	N/A	AT3G01810.1
SDT	6698	Pavir.J21702.1	30200504	Pavir.J21702.1.p|PACid:30200504	-1.8273	0.281792	0.0024	2	Unclassified	AT4G37210.1	Tetratricopeptide repeat (TPR)-like superfamily protein	AT4G37210.1
SDT	6149	Pavir.J21027.1	30247869	Pavir.J21027.1.p|PACid:30247869	1.6469	3.1316	<.0001	3	Unclassified	AT1G02700.1	N/A	AT1G02700.1
SDT	7886	Pavir.Cb00985.1	30269834	Pavir.Cb00985.1.p|PACid:30269834	2.5927	6.03227	0.0016	2	Unclassified	AT1G09340.1	chloroplast RNA binding	AT1G09340.1
SDT	6726	Pavir.Aa03268.1	30252479	Pavir.Aa03268.1.p|PACid:30252479	1.4214	2.67845	<.0001	5	Unclassified	AT1G15330.1	Cystathionine beta-synthase (CBS) protein	AT1G15330.1
SDT	7535	Pavir.J02051.1	30185076	Pavir.J02051.1.p|PACid:30185076	2.4619	5.50942	0.0207	2	Unclassified	AT1G16000.1	N/A	AT1G16000.1
SDT	4723	Pavir.Ba02058.1	30291277	Pavir.Ba02058.1.p|PACid:30291277	1.4212	2.67808	0.0348	4	Unclassified	AT1G26460.1	Tetratricopeptide repeat (TPR)-like superfamily protein	AT1G26460.1
SDT	1248	Pavir.J03658.1	30284254	Pavir.J03658.1.p|PACid:30284254	1.5764	2.98225	<.0001	26	Unclassified	AT1G29850.1	double-stranded DNA-binding family protein	AT1G29850.1
SDT	2422	Pavir.Ca01801.1	30205996	Pavir.Ca01801.1.p|PACid:30205996	1.7692	3.40865	<.0001	12	Unclassified	AT1G29850.1	double-stranded DNA-binding family protein	AT1G29850.1
SDT	1104	Pavir.Fa01556.1	30187567	Pavir.Fa01556.1.p|PACid:30187567	2.4525	5.47364	<.0001	23	Unclassified	AT1G32300.1	D-arabinono-1,4-lactone oxidase family protein	AT1G32300.1
SDT	5404	Pavir.Ab00009.1	30236274	Pavir.Ab00009.1.p|PACid:30236274	1.7567	3.37924	<.0001	7	Unclassified	AT1G33230.1	TMPIT-like protein	AT1G33230.1
SDT	5543	Pavir.J09866.1	30271723	Pavir.J09866.1.p|PACid:30271723	1.6838	3.21273	0.013	4	Unclassified	AT1G33810.1	N/A	AT1G33810.1
SDT	6673	Pavir.Ca00857.1	30205447	Pavir.Ca00857.1.p|PACid:30205447	1.8825	3.68713	0.0097	3	Unclassified	AT1G55160.1	N/A	AT1G55160.1
SDT	3034	Pavir.J38252.1	30191144	Pavir.J38252.1.p|PACid:30191144	3.2678	9.63176	<.0001	8	Unclassified	AT1G60420.1	DC1 domain-containing protein	AT1G60420.1
SDT	5961	Pavir.Ib04279.1	30241295	Pavir.Ib04279.1.p|PACid:30241295	2.101	4.29007	0.0002	5	Unclassified	AT1G67350.1	N/A	AT1G67350.1
SDT	4139	Pavir.Fb01135.1	30278741	Pavir.Fb01135.1.p|PACid:30278741	1.3365	2.52538	0.0096	5	Unclassified	AT1G69840.1	SPFH/Band 7/PHB domain-containing membrane-associated protein family	AT1G69840.1
SDT	3245	Pavir.J01632.1	30273203	Pavir.J01632.1.p|PACid:30273203	1.9464	3.85412	<.0001	17	Unclassified	AT1G71950.1	Proteinase inhibitor, propeptide	AT1G71950.1
SDT	6949	Pavir.Gb01647.1	30221346	Pavir.Gb01647.1.p|PACid:30221346	3.1395	8.81219	<.0001	2	Unclassified	AT1G72100.1	late embryogenesis abundant domain-containing protein / LEA domain-containing protein	AT1G72100.1
SDT	6256	Pavir.Db01183.1	30261344	Pavir.Db01183.1.p|PACid:30261344	1.3614	2.56934	0.0345	4	Unclassified	AT1G79390.1	N/A	AT1G79390.1
SDT	5236	Pavir.Aa02614.1	30253703	Pavir.Aa02614.1.p|PACid:30253703	1.8535	3.61376	0.0052	5	Unclassified	AT2G07340.1	PREFOLDIN 1	AT2G07340.1
SDT	5199	Pavir.J11252.1	30270576	Pavir.J11252.1.p|PACid:30270576	1.8626	3.63662	0.0006	5	Unclassified	AT2G07340.1	PREFOLDIN 1	AT2G07340.1
SDT	3795	Pavir.Aa00186.1	30249333	Pavir.Aa00186.1.p|PACid:30249333	1.5955	3.02199	<.0001	5	Unclassified	AT2G12400.1	N/A	AT2G12400.1
SDT	6497	Pavir.Ab00144.1	30232057	Pavir.Ab00144.1.p|PACid:30232057	1.5033	2.8349	0.0076	6	Unclassified	AT2G14880.1	SWIB/MDM2 domain superfamily protein	AT2G14880.1
SDT	4341	Pavir.J09633.1	30220573	Pavir.J09633.1.p|PACid:30220573	1.627	3.0887	<.0001	10	Unclassified	AT2G16460.1	Protein of unknown function (DUF1640)	AT2G16460.1
SDT	431	Pavir.Ab00294.1	30233308	Pavir.Ab00294.1.p|PACid:30233308	1.5347	2.89728	<.0001	32	Unclassified	AT2G21870.1	copper ion binding;cobalt ion binding;zinc ion binding	AT2G21870.1
SDT	674	Pavir.Aa03192.1	30252830	Pavir.Aa03192.1.p|PACid:30252830	1.5654	2.9596	<.0001	13	Unclassified	AT2G21870.1	copper ion binding;cobalt ion binding;zinc ion binding	AT2G21870.1
SDT	4439	Pavir.Aa03139.1	30251745	Pavir.Aa03139.1.p|PACid:30251745	1.343	2.53678	0.0006	7	Unclassified	AT2G24020.1	Uncharacterised BCR, YbaB family COG0718	AT2G24020.1
SDT	2522	Pavir.Ib00581.1	30240206	Pavir.Ib00581.1.p|PACid:30240206	1.8445	3.59128	<.0001	25	Unclassified	AT2G33220.1	GRIM-19 protein	AT2G33220.1
SDT	38	Pavir.Ia03444.1	30214087	Pavir.Ia03444.1.p|PACid:30214087	1.3995	2.6381	<.0001	41	Unclassified	AT2G39050.1	hydroxyproline-rich glycoprotein family protein	AT2G39050.1
SDT	2101	Pavir.J33685.1	30190217	Pavir.J33685.1.p|PACid:30190217	2.2107	4.629	<.0001	27	Unclassified	AT2G39050.1	hydroxyproline-rich glycoprotein family protein	AT2G39050.1
SDT	1463	Pavir.Bb03734.1	30301206	Pavir.Bb03734.1.p|PACid:30301206	2.3016	4.93004	0.0195	3	Unclassified	AT2G39050.1	hydroxyproline-rich glycoprotein family protein	AT2G39050.1
SDT	8096	Pavir.Cb01443.1	30269304	Pavir.Cb01443.1.p|PACid:30269304	2.2373	4.71514	0.0063	2	Unclassified	AT2G41200.1	N/A	AT2G41200.1
SDT	7634	Pavir.Ia02273.1	30214274	Pavir.Ia02273.1.p|PACid:30214274	1.4662	2.76293	<.0001	3	Unclassified	AT2G44870.1	N/A	AT2G44870.1
SDT	2765	Pavir.Aa03571.3	30253925	Pavir.Aa03571.3.p|PACid:30253925	1.5624	2.95345	<.0001	7	Unclassified	AT2G45060.1	Uncharacterised conserved protein UCP022280	AT2G45060.1
SDT	1438	Pavir.Fa02213.1	30187556	Pavir.Fa02213.1.p|PACid:30187556	1.331	2.51577	<.0001	26	Unclassified	AT2G46740.1	D-arabinono-1,4-lactone oxidase family protein	AT2G46740.1
SDT	2505	Pavir.Fa01601.1	30186390	Pavir.Fa01601.1.p|PACid:30186390	2.4502	5.46492	<.0001	10	Unclassified	AT2G46760.1	D-arabinono-1,4-lactone oxidase family protein	AT2G46760.1
SDT	5040	Pavir.Db02130.1	30260942	Pavir.Db02130.1.p|PACid:30260942	2.2001	4.59511	<.0001	6	Unclassified	AT3G02645.1	Plant protein of unknown function (DUF247)	AT3G02645.1
SDT	5727	Pavir.J06823.1	30294236	Pavir.J06823.1.p|PACid:30294236	2.2931	4.90108	<.0001	4	Unclassified	AT3G02645.1	Plant protein of unknown function (DUF247)	AT3G02645.1
SDT	2434	Pavir.Bb03675.2	30300178	Pavir.Bb03675.2.p|PACid:30300178	1.4519	2.73568	0.0002	6	Unclassified	AT3G05500.1	Rubber elongation factor protein (REF)	AT3G05500.1
SDT	2435	Pavir.J00987.1	30296007	Pavir.J00987.1.p|PACid:30296007	1.5756	2.98059	<.0001	5	Unclassified	AT3G05500.1	Rubber elongation factor protein (REF)	AT3G05500.1
SDT	7492	Pavir.J27601.1	30246867	Pavir.J27601.1.p|PACid:30246867	1.7036	3.25713	<.0001	3	Unclassified	AT3G05500.1	Rubber elongation factor protein (REF)	AT3G05500.1
SDT	2712	Pavir.Ca01173.1	30206432	Pavir.Ca01173.1.p|PACid:30206432	2.0951	4.27256	0.0001	3	Unclassified	AT3G05500.1	Rubber elongation factor protein (REF)	AT3G05500.1
SDT	7613	Pavir.J11267.1	30306684	Pavir.J11267.1.p|PACid:30306684	2.7901	6.91678	0.0032	2	Unclassified	AT3G05500.1	Rubber elongation factor protein (REF)	AT3G05500.1
SDT	5195	Pavir.J39622.1	30207856	Pavir.J39622.1.p|PACid:30207856	2.5323	5.78493	<.0001	3	Unclassified	AT3G05975.1	Late embryogenesis abundant (LEA) hydroxyproline-rich glycoprotein family	AT3G05975.1
SDT	2990	Pavir.Ia00226.1	30211230	Pavir.Ia00226.1.p|PACid:30211230	1.4693	2.76888	<.0001	18	Unclassified	AT3G06610.1	DNA-binding enhancer protein-related	AT3G06610.1
SDT	6934	Pavir.Ha01845.1	30317381	Pavir.Ha01845.1.p|PACid:30317381	2.9305	7.62375	<.0001	2	Unclassified	AT3G10020.1	N/A	AT3G10020.1
SDT	4347	Pavir.Bb00247.1	30298381	Pavir.Bb00247.1.p|PACid:30298381	1.8005	3.48341	0.0026	4	Unclassified	AT3G10260.3	Reticulon family protein	AT3G10260.3
SDT	3907	Pavir.J35054.1	30225162	Pavir.J35054.1.p|PACid:30225162	1.5614	2.9514	<.0001	14	Unclassified	AT3G11780.1	MD-2-related lipid recognition domain-containing protein / ML domain-containing protein	AT3G11780.1
SDT	7417	Pavir.Ib01439.1	30241542	Pavir.Ib01439.1.p|PACid:30241542	1.5795	2.98866	0.0486	2	Unclassified	AT3G16990.1	Haem oxygenase-like, multi-helical	AT3G16990.1
SDT	4603	Pavir.Ca02217.1	30206046	Pavir.Ca02217.1.p|PACid:30206046	1.424	2.68328	<.0001	9	Unclassified	AT3G19340.1	Protein of unknown function (DUF3754)	AT3G19340.1
SDT	4184	Pavir.Aa00045.1	30253976	Pavir.Aa00045.1.p|PACid:30253976	1.4757	2.78119	<.0001	8	Unclassified	AT3G19990.1	N/A	AT3G19990.1
SDT	2560	Pavir.J30395.1	30283707	Pavir.J30395.1.p|PACid:30283707	1.543	2.914	<.0001	16	Unclassified	AT3G21360.1	2-oxoglutarate (2OG) and Fe(II)-dependent oxygenase superfamily protein	AT3G21360.1
SDT	3736	Pavir.Ha01297.1	30318350	Pavir.Ha01297.1.p|PACid:30318350	1.4964	2.82138	0.0003	7	Unclassified	AT3G22480.1	prefoldin 2	AT3G22480.1
SDT	5257	Pavir.Hb00624.1	30265037	Pavir.Hb00624.1.p|PACid:30265037	1.6618	3.16411	0.0073	3	Unclassified	AT3G22480.1	prefoldin 2	AT3G22480.1
SDT	556	Pavir.Ib03633.1	30239106	Pavir.Ib03633.1.p|PACid:30239106	2.7436	6.69739	<.0001	18	Unclassified	AT3G46750.1	N/A	AT3G46750.1
SDT	963	Pavir.Da01807.1	30191521	Pavir.Da01807.1.p|PACid:30191521	1.3386	2.52906	<.0001	14	Unclassified	AT4G11220.1	VIRB2-interacting protein 2	AT4G11220.1
SDT	928	Pavir.Db01185.1	30262670	Pavir.Db01185.1.p|PACid:30262670	1.3959	2.63153	<.0001	19	Unclassified	AT4G11220.1	VIRB2-interacting protein 2	AT4G11220.1
SDT	5711	Pavir.J11933.1	30197154	Pavir.J11933.1.p|PACid:30197154	2.1864	4.55168	0.0022	4	Unclassified	AT4G11220.1	VIRB2-interacting protein 2	AT4G11220.1
SDT	7444	Pavir.Bb00623.1	30299462	Pavir.Bb00623.1.p|PACid:30299462	1.4864	2.80189	0.0096	3	Unclassified	AT4G14100.1	transferases, transferring glycosyl groups	AT4G14100.1
SDT	6360	Pavir.J40146.1	30275542	Pavir.J40146.1.p|PACid:30275542	1.3738	2.59152	0.0343	4	Unclassified	AT4G26410.1	Uncharacterised conserved protein UCP022280	AT4G26410.1
SDT	7456	Pavir.Ib03696.1	30241723	Pavir.Ib03696.1.p|PACid:30241723	2.4423	5.43508	<.0001	3	Unclassified	AT4G31830.1	N/A	AT4G31830.1
SDT	5229	Pavir.J21656.1	30283869	Pavir.J21656.1.p|PACid:30283869	1.7122	3.2766	0.0015	3	Unclassified	AT4G33625.1	N/A	AT4G33625.1
SDT	606	Pavir.Ib00428.1	30242435	Pavir.Ib00428.1.p|PACid:30242435	3.4529	10.9503	<.0001	34	Unclassified	AT4G36600.1	Late embryogenesis abundant (LEA) protein	AT4G36600.1
SDT	2764	Pavir.J28600.1	30202435	Pavir.J28600.1.p|PACid:30202435	3.5287	11.541	<.0001	5	Unclassified	AT4G36600.1	Late embryogenesis abundant (LEA) protein	AT4G36600.1
SDT	3223	Pavir.Gb01551.1	30224863	Pavir.Gb01551.1.p|PACid:30224863	2.4181	5.34467	<.0001	7	Unclassified	AT4G39730.1	Lipase/lipooxygenase, PLAT/LH2 family protein	AT4G39730.1
SDT	6005	Pavir.J01936.1	30195714	Pavir.J01936.1.p|PACid:30195714	2.4903	5.61895	0.0156	6	Unclassified	AT4G39730.1	Lipase/lipooxygenase, PLAT/LH2 family protein	AT4G39730.1
SDT	805	Pavir.J02312.1	30294775	Pavir.J02312.1.p|PACid:30294775	2.4825	5.58865	<.0001	48	Unclassified	AT5G01300.1	PEBP (phosphatidylethanolamine-binding protein) family protein	AT5G01300.1
SDT	2968	Pavir.J05150.1	30200200	Pavir.J05150.1.p|PACid:30200200	1.7376	3.3348	<.0001	9	Unclassified	AT5G03880.1	Thioredoxin family protein	AT5G03880.1
SDT	2215	Pavir.Hb00971.1	30264344	Pavir.Hb00971.1.p|PACid:30264344	3.2229	9.33662	<.0001	14	Unclassified	AT5G07330.1	N/A	AT5G07330.1
SDT	6453	Pavir.J36320.1	30306808	Pavir.J36320.1.p|PACid:30306808	1.4595	2.75013	<.0001	2	Unclassified	AT5G11540.1	D-arabinono-1,4-lactone oxidase family protein	AT5G11540.1
SDT	8065	Pavir.J20469.2	30282135	Pavir.J20469.2.p|PACid:30282135	2.2685	4.81822	0.0361	3	Unclassified	AT5G12240.1	N/A	AT5G12240.1
SDT	8561	Pavir.Ib01188.1	30238826	Pavir.Ib01188.1.p|PACid:30238826	2.5687	5.93275	<.0001	2	Unclassified	AT5G16060.1	Cytochrome c oxidase biogenesis protein Cmc1-like	AT5G16060.1
SDT	6944	Pavir.Ea01246.1	30229431	Pavir.Ea01246.1.p|PACid:30229431	2.2527	4.76574	0.0003	2	Unclassified	AT5G24860.1	flowering promoting factor 1	AT5G24860.1
SDT	6465	Pavir.Bb03686.1	30299003	Pavir.Bb03686.1.p|PACid:30299003	1.3929	2.62606	0.0328	4	Unclassified	AT5G27760.1	Hypoxia-responsive family protein	AT5G27760.1
SDT	8090	Pavir.Da01043.1	30194438	Pavir.Da01043.1.p|PACid:30194438	1.4223	2.68012	<.0001	2	Unclassified	AT5G41761.1	N/A	AT5G41761.1
SDT	7078	Pavir.Ca01466.1	30205047	Pavir.Ca01466.1.p|PACid:30205047	1.474	2.77791	0.0002	5	Unclassified	AT5G42570.1	B-cell receptor-associated 31-like	AT5G42570.1
SDT	3602	Pavir.Aa02737.1	30249647	Pavir.Aa02737.1.p|PACid:30249647	2.8161	7.04256	<.0001	7	Unclassified	AT5G44310.2	Late embryogenesis abundant protein (LEA) family protein	AT5G44310.2
SDT	7796	Pavir.Gb00543.1	30223554	Pavir.Gb00543.1.p|PACid:30223554	2.8922	7.42402	<.0001	2	Unclassified	AT5G44310.2	Late embryogenesis abundant protein (LEA) family protein	AT5G44310.2
SDT	4536	Pavir.Ga00596.1	30302580	Pavir.Ga00596.1.p|PACid:30302580	3.0415	8.23347	<.0001	4	Unclassified	AT5G44310.2	Late embryogenesis abundant protein (LEA) family protein	AT5G44310.2
SDT	5657	Pavir.J28100.1	30272210	Pavir.J28100.1.p|PACid:30272210	1.5691	2.9672	0.0277	2	Unclassified	AT5G52180.1	N/A	AT5G52180.1
SDT	6415	Pavir.J03533.1	30274036	Pavir.J03533.1.p|PACid:30274036	1.4758	2.78138	<.0001	4	Unclassified	AT5G56980.1	N/A	AT5G56980.1
SDT	7292	Pavir.Fa00936.1	30187051	Pavir.Fa00936.1.p|PACid:30187051	1.3855	2.61262	<.0001	3	Unclassified	AT5G58005.1	Cytochrome c oxidase, subunit Vib family protein	AT5G58005.1
SDT	6143	Pavir.Ia00911.1	30215736	Pavir.Ia00911.1.p|PACid:30215736	1.7564	3.37854	<.0001	6	Unclassified	AT5G66780.1	N/A	AT5G66780.1

## Sheet: RT2_D1W_DEPs
Treatment	pro_hit_num	pro_acc	pro_ID	pro_acc_ID	log2_fold	fold_change	p_value	num_pep	Functional group at	at_acc	at_annota						Functional group	RT2_D1W_up	RT2_D1W_Dn
D1W	419	Pavir.J37823.1	30199614	Pavir.J37823.1.p|PACid:30199614	-1.8363	0.280039	<.0001	7	Abiotic/biotic stress	AT5G56030.1	heat shock protein 81-2						Abiotic/biotic stress	17	23
D1W	7441	Pavir.Ba03810.1	30293631	Pavir.Ba03810.1.p|PACid:30293631	-1.7906	0.289052	0.0001	2	Abiotic/biotic stress	AT1G50180.1	NB-ARC domain-containing disease resistance protein						Amino acid metabolism	1	17
D1W	378	Pavir.J01963.1	30218288	Pavir.J01963.1.p|PACid:30218288	-1.6858	0.310831	<.0001	9	Abiotic/biotic stress	AT5G09590.1	mitochondrial HSO70 2						Cell division & Cell cycle	0	2
D1W	149	Pavir.J27771.1	30219066	Pavir.J27771.1.p|PACid:30219066	-1.634	0.322194	<.0001	7	Abiotic/biotic stress	AT1G70840.1	MLP-like protein 31						Cell organization	2	15
D1W	6225	Pavir.J30426.1	30285893	Pavir.J30426.1.p|PACid:30285893	-1.6171	0.32599	<.0001	4	Abiotic/biotic stress	AT1G05850.1	Chitinase family protein						Cell wall synthesis / modification	0	23
D1W	6812	Pavir.Ea00102.1	30230749	Pavir.Ea00102.1.p|PACid:30230749	-1.5734	0.336016	<.0001	5	Abiotic/biotic stress	AT4G23630.1	VIRB2-interacting protein 1						Development	9	9
D1W	100	Pavir.Ia01414.1	30213061	Pavir.Ia01414.1.p|PACid:30213061	-1.5511	0.34125	<.0001	2	Abiotic/biotic stress	AT5G09590.1	mitochondrial HSO70 2						DNA synthesis	0	4
D1W	7388	Pavir.Da01932.1	30194082	Pavir.Da01932.1.p|PACid:30194082	-1.5441	0.34291	<.0001	2	Abiotic/biotic stress	AT2G36800.1	don-glucosyltransferase 1						Fermentation	0	3
D1W	229	Pavir.J31266.1	30315516	Pavir.J31266.1.p|PACid:30315516	-1.4743	0.359908	0.0001	4	Abiotic/biotic stress	AT1G70840.1	MLP-like protein 31						Functional enzyme	11	62
D1W	4397	Pavir.Eb00451.1	30310091	Pavir.Eb00451.1.p|PACid:30310091	-1.4358	0.369642	<.0001	3	Abiotic/biotic stress	AT3G17020.1	Adenine nucleotide alpha hydrolases-like superfamily protein						Glycolysis	2	8
D1W	355	Pavir.Ba01698.1	30291323	Pavir.Ba01698.1.p|PACid:30291323	-1.4111	0.376025	<.0001	5	Abiotic/biotic stress	AT5G09590.1	mitochondrial HSO70 2						Lipids metabolism	1	16
D1W	39	Pavir.Ib01258.1	30237909	Pavir.Ib01258.1.p|PACid:30237909	-1.389	0.381829	<.0001	5	Abiotic/biotic stress	AT3G12580.1	heat shock protein 70						Major CHO metabolism	2	9
D1W	5691	Pavir.J30350.1	30270919	Pavir.J30350.1.p|PACid:30270919	-1.3558	0.390718	0.0001	3	Abiotic/biotic stress	AT1G09560.1	germin-like protein 5						Metal binding	1	5
D1W	4006	Pavir.J11116.1	30277030	Pavir.J11116.1.p|PACid:30277030	-1.3232	0.399648	<.0001	4	Abiotic/biotic stress	AT5G52060.1	BCL-2-associated athanogene 1						Minor CHO metabolism	1	2
D1W	2610	Pavir.Ba00689.1	30289496	Pavir.Ba00689.1.p|PACid:30289496	-1.3183	0.401007	<.0001	9	Abiotic/biotic stress	AT4G27320.1	Adenine nucleotide alpha hydrolases-like superfamily protein						Mitochondrial electron transport / ATP synthesis	1	5
D1W	3057	Pavir.Da02354.1	30192408	Pavir.Da02354.1.p|PACid:30192408	-1.3153	0.401842	<.0001	7	Abiotic/biotic stress	AT5G52060.1	BCL-2-associated athanogene 1						Nucleotide metabolism	0	6
D1W	4080	Pavir.Da01414.1	30193093	Pavir.Da01414.1.p|PACid:30193093	-1.3052	0.404665	<.0001	9	Abiotic/biotic stress	AT1G20030.2	Pathogenesis-related thaumatin superfamily protein						Pentose phosphate pathway	0	1
D1W	453	Pavir.Ib02877.1	30238824	Pavir.Ib02877.1.p|PACid:30238824	-1.30467	0.404814	<.0001	15	Abiotic/biotic stress	AT1G79920.1	Heat shock protein 70 (Hsp 70) family protein						Phyto-hormone metabolism	2	19
D1W	4535	Pavir.Ea00401.1	30230128	Pavir.Ea00401.1.p|PACid:30230128	-1.284	0.410655	0.0005	2	Abiotic/biotic stress	AT3G17020.1	Adenine nucleotide alpha hydrolases-like superfamily protein						Protein degradation	0	15
D1W	6249	Pavir.J36222.1	30244386	Pavir.J36222.1.p|PACid:30244386	-1.2576	0.418239	0.0003	2	Abiotic/biotic stress	AT1G24120.1	ARG1-like 1						Protein modification	0	8
D1W	724	Pavir.J30437.1	30285728	Pavir.J30437.1.p|PACid:30285728	-1.25447	0.419148	<.0001	47	Abiotic/biotic stress	AT4G24190.2	Chaperone protein htpG family protein						Protein synthesis	0	37
D1W	588	Pavir.Bb02408.1	30296941	Pavir.Bb02408.1.p|PACid:30296941	-1.253	0.419575	<.0001	7	Abiotic/biotic stress	AT5G56030.1	heat shock protein 81-2						Protein targeting & vesicle tansport	1	13
D1W	42	Pavir.J00888.1	30275040	Pavir.J00888.1.p|PACid:30275040	-1.2269	0.427234	0.0006	2	Abiotic/biotic stress	AT5G02500.1	heat shock cognate protein 70-1						Redox balance	1	5
D1W	6412	Pavir.Ib02577.1	30239592	Pavir.Ib02577.1.p|PACid:30239592	1.221	2.33108	<.0001	5	Abiotic/biotic stress	AT1G66100.1	Plant thionin						Regulation of transcription	3	7
D1W	6138	Pavir.J15194.1	30216067	Pavir.J15194.1.p|PACid:30216067	1.3176	2.49251	<.0001	4	Abiotic/biotic stress	AT3G10680.1	HSP20-like chaperones superfamily protein						RNA processing	1	1
D1W	5790	Pavir.Ea02477.1	30226286	Pavir.Ea02477.1.p|PACid:30226286	1.3404	2.53222	<.0001	4	Abiotic/biotic stress	AT5G24090.1	chitinase A						S-assimilation	0	2
D1W	1141	Pavir.J08073.1	30308630	Pavir.J08073.1.p|PACid:30308630	1.3637	2.57344	<.0001	11	Abiotic/biotic stress	AT4G27670.1	heat shock protein 21						Secondary metabolism	0	27
D1W	1699	Pavir.Aa00282.1	30253178	Pavir.Aa00282.1.p|PACid:30253178	1.418	2.67215	0.0016	2	Abiotic/biotic stress	AT1G54050.1	HSP20-like chaperones superfamily protein						Signaling regulation	3	29
D1W	4677	Pavir.Ia01894.1	30209168	Pavir.Ia01894.1.p|PACid:30209168	1.43552	2.7048	<.0001	9	Abiotic/biotic stress	AT5G20970.1	HSP20-like chaperones superfamily protein						TCA cycle	2	2
D1W	2552	Pavir.J34564.1	30263851	Pavir.J34564.1.p|PACid:30263851	1.4576	2.74651	<.0001	9	Abiotic/biotic stress	AT3G12500.1	basic chitinase						Transport	19	3
D1W	2426	Pavir.Ab00731.1	30236320	Pavir.Ab00731.1.p|PACid:30236320	1.608	3.04829	<.0001	14	Abiotic/biotic stress	AT1G52560.1	HSP20-like chaperones superfamily protein						Unclassified	22	74
D1W	2135	Pavir.J19824.1	30189354	Pavir.J19824.1.p|PACid:30189354	1.6822	3.20917	0.0007	2	Abiotic/biotic stress	AT5G59720.1	heat shock protein 18.2
D1W	63	Pavir.Ia03665.1	30210947	Pavir.Ia03665.1.p|PACid:30210947	1.7034	3.25668	<.0001	5	Abiotic/biotic stress	AT5G02500.1	heat shock cognate protein 70-1
D1W	4580	Pavir.Bb03197.1	30299608	Pavir.Bb03197.1.p|PACid:30299608	1.736	3.3311	<.0001	6	Abiotic/biotic stress	AT4G11650.1	osmotin 34
D1W	4929	Pavir.Eb03806.1	30312699	Pavir.Eb03806.1.p|PACid:30312699	1.9602	3.89116	<.0001	8	Abiotic/biotic stress	AT4G11650.1	osmotin 34
D1W	2204	Pavir.J21349.1	30225604	Pavir.J21349.1.p|PACid:30225604	2.0113	4.03145	<.0001	3	Abiotic/biotic stress	AT1G54050.1	HSP20-like chaperones superfamily protein
D1W	9993	Pavir.J36772.1	30203019	Pavir.J36772.1.p|PACid:30203019	2.0789	4.22485	<.0001	3	Abiotic/biotic stress	AT3G04720.1	pathogenesis-related 4
D1W	941	Pavir.J13075.1	30246880	Pavir.J13075.1.p|PACid:30246880	2.9171	7.55326	<.0001	9	Abiotic/biotic stress	AT5G66400.1	Dehydrin family protein
D1W	9243	Pavir.J37293.1	30208847	Pavir.J37293.1.p|PACid:30208847	2.9982	7.99002	<.0001	2	Abiotic/biotic stress	AT4G26090.1	NB-ARC domain-containing disease resistance protein
D1W	158	Pavir.J14758.1	30244007	Pavir.J14758.1.p|PACid:30244007	-1.7683	0.293554	<.0001	6	Amino acid metabolism	AT4G34200.1	D-3-phosphoglycerate dehydrogenase
D1W	1547	Pavir.J08717.1	30282112	Pavir.J08717.1.p|PACid:30282112	-1.6113	0.327303	<.0001	4	Amino acid metabolism	AT3G61440.1	cysteine synthase C1
D1W	152	Pavir.Ga00286.1	30303791	Pavir.Ga00286.1.p|PACid:30303791	-1.5181	0.349145	<.0001	5	Amino acid metabolism	AT3G19480.1	D-3-phosphoglycerate dehydrogenase
D1W	2726	Pavir.J16987.1	30191258	Pavir.J16987.1.p|PACid:30191258	-1.5082	0.35155	<.0001	15	Amino acid metabolism	AT2G24580.1	FAD-dependent oxidoreductase family protein
D1W	1146	Pavir.Fb00835.1	30278287	Pavir.Fb00835.1.p|PACid:30278287	-1.4664	0.361884	<.0001	7	Amino acid metabolism	AT3G22200.1	Pyridoxal phosphate (PLP)-dependent transferases superfamily protein
D1W	3569	Pavir.Ga02401.1	30303558	Pavir.Ga02401.1.p|PACid:30303558	-1.39684	0.37976	<.0001	14	Amino acid metabolism	AT2G43750.1	O-acetylserine (thiol) lyase B
D1W	8998	Pavir.Ib02393.1	30236842	Pavir.Ib02393.1.p|PACid:30236842	-1.3631	0.388746	0.0002	2	Amino acid metabolism	AT3G30775.1	Methylenetetrahydrofolate reductase family protein
D1W	533	Pavir.Ia03849.1	30211097	Pavir.Ia03849.1.p|PACid:30211097	-1.3351	0.396365	<.0001	3	Amino acid metabolism	AT2G29690.1	anthranilate synthase 2
D1W	286	Pavir.Ib00851.1	30241776	Pavir.Ib00851.1.p|PACid:30241776	-1.3266	0.398707	<.0001	13	Amino acid metabolism	AT2G33150.1	peroxisomal 3-ketoacyl-CoA thiolase 3
D1W	1545	Pavir.Eb03232.1	30308980	Pavir.Eb03232.1.p|PACid:30308980	-1.30112	0.405811	<.0001	12	Amino acid metabolism	AT5G11520.1	aspartate aminotransferase 3
D1W	7994	Pavir.J25848.1	30216148	Pavir.J25848.1.p|PACid:30216148	-1.2953	0.407451	<.0001	2	Amino acid metabolism	AT3G06350.1	dehydroquinate dehydratase, putative / shikimate dehydrogenase, putative
D1W	1325	Pavir.Ib00459.1	30242272	Pavir.Ib00459.1.p|PACid:30242272	-1.2436	0.422318	<.0001	4	Amino acid metabolism	AT4G39660.1	alanine:glyoxylate aminotransferase 2
D1W	1321	Pavir.Db02344.1	30262703	Pavir.Db02344.1.p|PACid:30262703	-1.22566	0.427602	<.0001	18	Amino acid metabolism	AT2G04400.1	Aldolase-type TIM barrel family protein
D1W	637	Pavir.Fb01711.1	30278677	Pavir.Fb01711.1.p|PACid:30278677	1.4282	2.69111	<.0001	4	Amino acid metabolism	AT5G17330.1	glutamate decarboxylase
D1W	8079	Pavir.J40141.1	30216879	Pavir.J40141.1.p|PACid:30216879	-1.293	0.408102	0.0004	2	Amino acid metabolism / Functional enzyme	AT1G72190.1	D-isomer specific 2-hydroxyacid dehydrogenase family protein
D1W	2212	Pavir.Ca01509.1	30206761	Pavir.Ca01509.1.p|PACid:30206761	-1.6559	0.31734	<.0001	4	Amino acid metabolism / Lipids metabolism	AT4G14440.1	3-hydroxyacyl-CoA dehydratase 1
D1W	8510	Pavir.Ia02164.1	30214765	Pavir.Ia02164.1.p|PACid:30214765	-1.3814	0.383846	0.0016	2	Amino acid metabolism / Lipids metabolism	AT4G31810.1	ATP-dependent caseinolytic (Clp) protease/crotonase family protein
D1W	1755	Pavir.Ib00795.1	30240552	Pavir.Ib00795.1.p|PACid:30240552	-1.37221	0.386299	<.0001	21	Ammonia metabolism	AT5G37600.1	glutamine synthase clone R1
D1W	752	Pavir.J08673.1	30190581	Pavir.J08673.1.p|PACid:30190581	-1.3594	0.389744	<.0001	2	Cell division & Cell cycle	AT5G03340.1	ATPase, AAA-type, CDC48 protein
D1W	5955	Pavir.J20623.1	30281443	Pavir.J20623.1.p|PACid:30281443	-1.3261	0.398845	<.0001	3	Cell division & Cell cycle	AT1G26940.1	Cyclophilin-like peptidyl-prolyl cis-trans isomerase family protein
D1W	92	Pavir.J18635.1	30199985	Pavir.J18635.1.p|PACid:30199985	-2.1198	0.230079	<.0001	3	Cell organization	AT3G12110.1	actin-11
D1W	2782	Pavir.J01553.1	30217534	Pavir.J01553.1.p|PACid:30217534	-1.7031	0.307125	<.0001	3	Cell organization	AT2G31900.1	myosin-like protein XIF
D1W	8249	Pavir.Ia04198.1	30215966	Pavir.Ia04198.1.p|PACid:30215966	-1.6232	0.324615	<.0001	2	Cell organization	AT1G01950.1	armadillo repeat kinesin 2
D1W	5888	Pavir.J24184.1	30286065	Pavir.J24184.1.p|PACid:30286065	-1.598	0.330335	0.0002	2	Cell organization	AT3G12020.2	P-loop containing nucleoside triphosphate hydrolases superfamily protein
D1W	227	Pavir.J00824.1	30273961	Pavir.J00824.1.p|PACid:30273961	-1.5404	0.34379	<.0001	4	Cell organization	AT1G50010.1	tubulin alpha-2 chain
D1W	3219	Pavir.Aa00796.1	30249014	Pavir.Aa00796.1.p|PACid:30249014	-1.5271	0.346974	<.0001	10	Cell organization	AT3G27960.1	Tetratricopeptide repeat (TPR)-like superfamily protein
D1W	190	Pavir.Eb03501.1	30312596	Pavir.Eb03501.1.p|PACid:30312596	-1.5202	0.348638	0.0002	2	Cell organization	AT5G12250.1	beta-6 tubulin
D1W	370	Pavir.J40019.1	30256088	Pavir.J40019.1.p|PACid:30256088	-1.4471	0.366758	<.0001	13	Cell organization	AT5G19780.1	tubulin alpha-5
D1W	5606	Pavir.Ca00642.1	30204600	Pavir.Ca00642.1.p|PACid:30204600	-1.3858	0.382677	0.0003	3	Cell organization	AT5G59890.1	actin depolymerizing factor 4
D1W	2227	Pavir.Ea02930.1	30228432	Pavir.Ea02930.1.p|PACid:30228432	-1.3476	0.392945	<.0001	10	Cell organization	AT2G19770.1	profilin 5
D1W	154	Pavir.Ea03187.1	30229698	Pavir.Ea03187.1.p|PACid:30229698	-1.3395	0.395158	<.0001	3	Cell organization	AT5G12250.1	beta-6 tubulin
D1W	6662	Pavir.Ia00064.1	30215313	Pavir.Ia00064.1.p|PACid:30215313	-1.3261	0.398845	<.0001	4	Cell organization	AT1G04160.1	myosin XI B
D1W	148	Pavir.Ia01092.1	30215299	Pavir.Ia01092.1.p|PACid:30215299	-1.29908	0.406385	<.0001	40	Cell organization	AT5G23860.1	tubulin beta 8
D1W	233	Pavir.Ia00744.1	30214876	Pavir.Ia00744.1.p|PACid:30214876	-1.2633	0.41659	<.0001	3	Cell organization	AT4G14960.2	Tubulin/FtsZ family protein
D1W	4114	Pavir.J37168.1	30277249	Pavir.J37168.1.p|PACid:30277249	-1.2476	0.421148	<.0001	3	Cell organization	AT4G05190.1	kinesin 5
D1W	2006	Pavir.J16347.1	30307684	Pavir.J16347.1.p|PACid:30307684	1.6025	3.03669	<.0001	9	Cell organization	AT1G01750.1	actin depolymerizing factor 11
D1W	1508	Pavir.J00892.1	30275043	Pavir.J00892.1.p|PACid:30275043	2.0472	4.13303	<.0001	15	Cell organization	AT1G01750.1	actin depolymerizing factor 11
D1W	7620	Pavir.J00095.1	30220384	Pavir.J00095.1.p|PACid:30220384	-1.6796	0.312169	<.0001	4	Cell wall synthesis / modification	AT1G19170.1	Pectin lyase-like superfamily protein
D1W	2411	Pavir.Ga01268.2	30305724	Pavir.Ga01268.2.p|PACid:30305724	-1.6057	0.328576	<.0001	19	Cell wall synthesis / modification	AT5G49720.1	glycosyl hydrolase 9A1
D1W	139	Pavir.Ia00394.1	30212391	Pavir.Ia00394.1.p|PACid:30212391	-1.5402	0.343838	<.0001	3	Cell wall synthesis / modification	AT3G29360.1	UDP-glucose 6-dehydrogenase family protein
D1W	7192	Pavir.Ia00526.1	30212304	Pavir.Ia00526.1.p|PACid:30212304	-1.5113	0.350795	<.0001	5	Cell wall synthesis / modification	AT5G60920.1	COBRA-like extracellular glycosyl-phosphatidyl inositol-anchored protein family
D1W	2433	Pavir.Ib04298.1	30238505	Pavir.Ib04298.1.p|PACid:30238505	-1.4879	0.356531	<.0001	3	Cell wall synthesis / modification	AT5G49720.1	glycosyl hydrolase 9A1
D1W	6459	Pavir.Bb03029.1	30300624	Pavir.Bb03029.1.p|PACid:30300624	-1.4779	0.359011	<.0001	4	Cell wall synthesis / modification	AT5G16910.1	cellulose-synthase like D2
D1W	403	Pavir.Cb01376.1	30269049	Pavir.Cb01376.1.p|PACid:30269049	-1.4478	0.36658	<.0001	7	Cell wall synthesis / modification	AT3G62830.1	NAD(P)-binding Rossmann-fold superfamily protein
D1W	2639	Pavir.Eb03139.1	30309779	Pavir.Eb03139.1.p|PACid:30309779	-1.435	0.369847	<.0001	18	Cell wall synthesis / modification	AT4G18780.1	cellulose synthase family protein
D1W	5012	Pavir.Ea01504.1	30229524	Pavir.Ea01504.1.p|PACid:30229524	-1.4215	0.373324	<.0001	6	Cell wall synthesis / modification	AT4G24000.1	cellulose synthase like G2
D1W	4728	Pavir.Ib02048.1	30240916	Pavir.Ib02048.1.p|PACid:30240916	-1.4044	0.377775	<.0001	10	Cell wall synthesis / modification	AT5G15630.1	COBRA-like extracellular glycosyl-phosphatidyl inositol-anchored protein family
D1W	795	Pavir.Ia01436.1	30213433	Pavir.Ia01436.1.p|PACid:30213433	-1.38844	0.381978	<.0001	19	Cell wall synthesis / modification	AT5G15650.1	reversibly glycosylated polypeptide 2
D1W	1681	Pavir.Ib00165.1	30240659	Pavir.Ib00165.1.p|PACid:30240659	-1.36582	0.388014	<.0001	25	Cell wall synthesis / modification	AT3G60900.1	FASCICLIN-like arabinogalactan-protein 10
D1W	3035	Pavir.J26736.1	30189338	Pavir.J26736.1.p|PACid:30189338	-1.3293	0.397961	<.0001	3	Cell wall synthesis / modification	AT5G64740.1	cellulose synthase 6
D1W	1515	Pavir.Ca01073.1	30203745	Pavir.Ca01073.1.p|PACid:30203745	-1.3203	0.400452	<.0001	7	Cell wall synthesis / modification	AT4G32410.1	cellulose synthase 1
D1W	575	Pavir.J12326.1	30257213	Pavir.J12326.1.p|PACid:30257213	-1.3028	0.405339	<.0001	8	Cell wall synthesis / modification	AT1G31070.2	N-acetylglucosamine-1-phosphate uridylyltransferase 1
D1W	3659	Pavir.Ib01408.1	30240317	Pavir.Ib01408.1.p|PACid:30240317	-1.2892	0.409178	<.0001	3	Cell wall synthesis / modification	AT1G30620.1	NAD(P)-binding Rossmann-fold superfamily protein
D1W	7647	Pavir.J16676.1	30267252	Pavir.J16676.1.p|PACid:30267252	-1.2772	0.412596	<.0001	4	Cell wall synthesis / modification	AT2G36870.1	xyloglucan endotransglucosylase/hydrolase 32
D1W	3636	Pavir.Fb00422.1	30279090	Pavir.Fb00422.1.p|PACid:30279090	-1.2652	0.416042	<.0001	12	Cell wall synthesis / modification	AT5G16910.1	cellulose-synthase like D2
D1W	2897	Pavir.J27681.1	30217933	Pavir.J27681.1.p|PACid:30217933	-1.2314	0.425904	0.0007	2	Cell wall synthesis / modification	AT4G39350.1	cellulose synthase A2
D1W	2377	Pavir.Ia00651.1	30212669	Pavir.Ia00651.1.p|PACid:30212669	-1.2268	0.427264	<.0001	4	Cell wall synthesis / modification	AT5G49720.1	glycosyl hydrolase 9A1
D1W	7301	Pavir.Gb00552.1	30221379	Pavir.Gb00552.1.p|PACid:30221379	-1.2241	0.428064	<.0001	4	Cell wall synthesis / modification	AT3G10700.1	galacturonic acid kinase
D1W	3962	Pavir.Ib00804.1	30240243	Pavir.Ib00804.1.p|PACid:30240243	-1.2217	0.428777	<.0001	2	Cell wall synthesis / modification	AT5G44030.1	cellulose synthase A4
D1W	8494	Pavir.Ib02353.1	30237217	Pavir.Ib02353.1.p|PACid:30237217	-1.2203	0.429193	<.0001	2	Cell wall synthesis / modification	AT3G45970.1	expansin-like A1
D1W	4054	Pavir.Ea03639.1	30227669	Pavir.Ea03639.1.p|PACid:30227669	-1.7108	0.305491	<.0001	5	Development	AT1G21460.1	Nodulin MtN3 family protein
D1W	2177	Pavir.Ab01802.1	30233146	Pavir.Ab01802.1.p|PACid:30233146	-1.3227	0.399786	<.0001	15	Development	AT2G27550.1	centroradialis
D1W	8767	Pavir.J01374.1	30219386	Pavir.J01374.1.p|PACid:30219386	-1.3121	0.402734	0.0002	2	Development	AT1G75900.1	GDSL-like Lipase/Acylhydrolase superfamily protein
D1W	7096	Pavir.Bb00767.1	30300841	Pavir.Bb00767.1.p|PACid:30300841	-1.2684	0.41512	<.0001	3	Development	AT2G37860.3	Protein of unknown function (DUF3411)
D1W	8826	Pavir.Da02118.1	30191764	Pavir.Da02118.1.p|PACid:30191764	-1.2608	0.417312	0.0005	2	Development	AT5G56190.2	Transducin/WD40 repeat-like superfamily protein
D1W	6703	Pavir.Ea03737.1	30230398	Pavir.Ea03737.1.p|PACid:30230398	-1.2442	0.422142	<.0001	3	Development	AT2G35980.1	Late embryogenesis abundant (LEA) hydroxyproline-rich glycoprotein family
D1W	5777	Pavir.Fb01772.1	30280446	Pavir.Fb01772.1.p|PACid:30280446	-1.2362	0.424489	<.0001	4	Development	AT2G26560.1	phospholipase A 2A
D1W	9143	Pavir.Db02251.2	30261869	Pavir.Db02251.2.p|PACid:30261869	-1.2343	0.425049	0.0011	2	Development	AT5G25940.1	early nodulin-related
D1W	5916	Pavir.Ia03678.1	30215378	Pavir.Ia03678.1.p|PACid:30215378	1.2991	2.46075	<.0001	5	Development	AT3G53040.1	late embryogenesis abundant protein, putative / LEA protein, putative
D1W	4642	Pavir.J19600.1	30274742	Pavir.J19600.1.p|PACid:30274742	1.3095	2.47856	0.0062	4	Development	AT3G22490.1	Seed maturation protein
D1W	4183	Pavir.Bb02409.1	30298298	Pavir.Bb02409.1.p|PACid:30298298	1.3344	2.52171	<.0001	7	Development	AT2G33690.1	Late embryogenesis abundant protein, group 6
D1W	4510	Pavir.J19751.1	30274240	Pavir.J19751.1.p|PACid:30274240	1.4979	2.82431	<.0001	7	Development	AT1G28330.1	dormancy-associated protein-like 1
D1W	6623	Pavir.J24821.1	30277014	Pavir.J24821.1.p|PACid:30277014	1.8625	3.63637	<.0001	3	Development	AT1G52690.1	Late embryogenesis abundant protein (LEA) family protein
D1W	261	Pavir.Ca01780.1	30206225	Pavir.Ca01780.1.p|PACid:30206225	2.2449	4.74004	<.0001	37	Development	AT3G15670.1	Late embryogenesis abundant protein (LEA) family protein
D1W	5687	Pavir.Fa01222.1	30186751	Pavir.Fa01222.1.p|PACid:30186751	2.634	6.20745	<.0001	7	Development	AT5G06760.1	Late Embryogenesis Abundant 4-5
D1W	544	Pavir.J00158.1	30282759	Pavir.J00158.1.p|PACid:30282759	3.199	9.18322	<.0001	37	Development	AT3G15670.1	Late embryogenesis abundant protein (LEA) family protein
D1W	5289	Pavir.Fb00948.1	30279736	Pavir.Fb00948.1.p|PACid:30279736	3.9728	15.7012	<.0001	3	Development	AT3G22490.1	Seed maturation protein
D1W	9130	Pavir.Ib02056.1	30240558	Pavir.Ib02056.1.p|PACid:30240558	-1.2764	0.412824	0.0011	2	Development	AT1G71270.1	Vps52 / Sac2 family
D1W	7207	Pavir.J31192.1	30274917	Pavir.J31192.1.p|PACid:30274917	-1.6747	0.313231	<.0001	2	DNA synthesis	AT1G06760.1	winged-helix DNA-binding transcription factor family protein
D1W	4589	Pavir.Aa01553.1	30251686	Pavir.Aa01553.1.p|PACid:30251686	-1.5115	0.350746	<.0001	5	DNA synthesis	AT1G18800.1	NAP1-related protein 2
D1W	8366	Pavir.J38455.1	30236729	Pavir.J38455.1.p|PACid:30236729	-1.2881	0.40949	<.0001	3	DNA synthesis	AT4G21600.1	endonuclease 5
D1W	3618	Pavir.J34376.1	30255019	Pavir.J34376.1.p|PACid:30255019	-1.8613	0.275228	<.0001	3	Fermentation	AT4G33070.1	Thiamine pyrophosphate dependent pyruvate decarboxylase family protein
D1W	2310	Pavir.J12247.1	30296044	Pavir.J12247.1.p|PACid:30296044	-1.6628	0.315826	<.0001	8	Fermentation	AT3G24503.1	aldehyde dehydrogenase 2C4
D1W	3686	Pavir.Hb01524.1	30264562	Pavir.Hb01524.1.p|PACid:30264562	-1.5398	0.343933	<.0001	6	Fermentation	AT1G44170.1	aldehyde dehydrogenase 3H1
D1W	2461	Pavir.Ca02312.1	30204578	Pavir.Ca02312.1.p|PACid:30204578	-2.5335	0.172719	<.0001	3	Functional enzyme	AT1G19715.3	Mannose-binding lectin superfamily protein
D1W	4257	Pavir.Ib01632.1	30237007	Pavir.Ib01632.1.p|PACid:30237007	-2.3354	0.198141	<.0001	3	Functional enzyme	AT5G42180.1	Peroxidase superfamily protein
D1W	5483	Pavir.Bb00159.1	30301712	Pavir.Bb00159.1.p|PACid:30301712	-2.2528	0.209816	<.0001	2	Functional enzyme	AT5G06060.1	NAD(P)-binding Rossmann-fold superfamily protein
D1W	3407	Pavir.Bb00696.1	30297757	Pavir.Bb00696.1.p|PACid:30297757	-2.0112	0.248067	<.0001	12	Functional enzyme	AT1G19715.3	Mannose-binding lectin superfamily protein
D1W	5028	Pavir.Fb00095.1	30279969	Pavir.Fb00095.1.p|PACid:30279969	-1.8592	0.275629	<.0001	5	Functional enzyme	AT1G13080.1	cytochrome P450, family 71, subfamily B, polypeptide 2
D1W	2078	Pavir.Ib02558.1	30239510	Pavir.Ib02558.1.p|PACid:30239510	-1.8301	0.281245	<.0001	5	Functional enzyme	AT5G05340.1	Peroxidase superfamily protein
D1W	4363	Pavir.Bb01340.1	30298714	Pavir.Bb01340.1.p|PACid:30298714	-1.7978	0.287613	<.0001	9	Functional enzyme	AT2G16890.2	UDP-Glycosyltransferase superfamily protein
D1W	4259	Pavir.Db01633.1	30260003	Pavir.Db01633.1.p|PACid:30260003	-1.7835	0.290478	<.0001	3	Functional enzyme	AT1G68850.1	Peroxidase superfamily protein
D1W	2545	Pavir.Ia02784.1	30215793	Pavir.Ia02784.1.p|PACid:30215793	-1.7785	0.291486	<.0001	2	Functional enzyme	AT5G05340.1	Peroxidase superfamily protein
D1W	5155	Pavir.Da00938.1	30193188	Pavir.Da00938.1.p|PACid:30193188	-1.7754	0.292113	<.0001	4	Functional enzyme	AT4G20860.1	FAD-binding Berberine family protein
D1W	6705	Pavir.J00825.1	30273963	Pavir.J00825.1.p|PACid:30273963	-1.7403	0.299307	<.0001	4	Functional enzyme	AT5G06730.1	Peroxidase superfamily protein
D1W	6694	Pavir.J28870.1	30207811	Pavir.J28870.1.p|PACid:30207811	-1.7007	0.307637	<.0001	2	Functional enzyme	AT4G00360.1	cytochrome P450, family 86, subfamily A, polypeptide 2
D1W	5543	Pavir.J14918.1	30273607	Pavir.J14918.1.p|PACid:30273607	-1.6966	0.308512	0.0005	2	Functional enzyme	AT5G25120.1	ytochrome p450, family 71, subfamily B, polypeptide 11
D1W	2588	Pavir.Ba01232.1	30291469	Pavir.Ba01232.1.p|PACid:30291469	-1.6849	0.311024	<.0001	2	Functional enzyme	AT1G75680.1	glycosyl hydrolase 9B7
D1W	5364	Pavir.Da01850.1	30192025	Pavir.Da01850.1.p|PACid:30192025	-1.6659	0.315148	<.0001	5	Functional enzyme	AT2G36780.1	UDP-Glycosyltransferase superfamily protein
D1W	4724	Pavir.Ia03296.1	30210796	Pavir.Ia03296.1.p|PACid:30210796	-1.6319	0.322663	<.0001	4	Functional enzyme	AT5G42180.1	Peroxidase superfamily protein
D1W	2808	Pavir.Ib01762.1	30238565	Pavir.Ib01762.1.p|PACid:30238565	-1.6072	0.328235	<.0001	13	Functional enzyme	AT5G58390.1	Peroxidase superfamily protein
D1W	6367	Pavir.J05735.1	30281527	Pavir.J05735.1.p|PACid:30281527	-1.583	0.333787	0.0014	2	Functional enzyme	AT1G74460.1	GDSL-like Lipase/Acylhydrolase superfamily protein
D1W	7572	Pavir.Ib02639.1	30237216	Pavir.Ib02639.1.p|PACid:30237216	-1.5595	0.339269	0.0011	2	Functional enzyme	AT1G64710.1	GroES-like zinc-binding dehydrogenase family protein
D1W	1654	Pavir.Ib03534.1	30236825	Pavir.Ib03534.1.p|PACid:30236825	-1.5488	0.341794	<.0001	17	Functional enzyme	AT5G23190.1	cytochrome P450, family 86, subfamily B, polypeptide 1
D1W	5148	Pavir.Ib00991.1	30242423	Pavir.Ib00991.1.p|PACid:30242423	-1.5233	0.347889	<.0001	4	Functional enzyme	AT1G14700.1	purple acid phosphatase 3
D1W	2571	Pavir.Bb00105.1	30297002	Pavir.Bb00105.1.p|PACid:30297002	-1.4981	0.354019	<.0001	17	Functional enzyme	AT3G01190.1	Peroxidase superfamily protein
D1W	3239	Pavir.Db00237.1	30263213	Pavir.Db00237.1.p|PACid:30263213	-1.47536	0.359644	<.0001	14	Functional enzyme	AT3G09270.1	glutathione S-transferase TAU 8
D1W	5731	Pavir.J00056.1	30294434	Pavir.J00056.1.p|PACid:30294434	-1.4354	0.369744	<.0001	5	Functional enzyme	AT3G22600.1	Bifunctional inhibitor/lipid-transfer protein/seed storage 2S albumin superfamily protein
D1W	4607	Pavir.Ea01196.1	30227561	Pavir.Ea01196.1.p|PACid:30227561	-1.4249	0.372445	<.0001	8	Functional enzyme	AT5G36110.1	cytochrome P450, family 716, subfamily A, polypeptide 1
D1W	6449	Pavir.Gb01082.1	30223192	Pavir.Gb01082.1.p|PACid:30223192	-1.4248	0.372471	<.0001	4	Functional enzyme	AT1G01600.1	cytochrome P450, family 86, subfamily A, polypeptide 4
D1W	5626	Pavir.Bb00046.1	30300067	Pavir.Bb00046.1.p|PACid:30300067	-1.4215	0.373324	<.0001	2	Functional enzyme	AT2G32300.1	uclacyanin 1
D1W	8563	Pavir.Ba00165.1	30290723	Pavir.Ba00165.1.p|PACid:30290723	-1.4145	0.37514	0.0008	2	Functional enzyme	AT5G05340.1	Peroxidase superfamily protein
D1W	387	Pavir.J07067.1	30199017	Pavir.J07067.1.p|PACid:30199017	-1.4108	0.376103	<.0001	42	Functional enzyme	AT4G11290.1	Peroxidase superfamily protein
D1W	796	Pavir.Gb00171.1	30222267	Pavir.Gb00171.1.p|PACid:30222267	-1.3783	0.384672	<.0001	21	Functional enzyme	AT1G71695.1	Peroxidase superfamily protein
D1W	1002	Pavir.J07533.1	30220156	Pavir.J07533.1.p|PACid:30220156	-1.36959	0.387001	<.0001	27	Functional enzyme	AT5G36110.1	cytochrome P450, family 716, subfamily A, polypeptide 1
D1W	2542	Pavir.J35671.1	30198606	Pavir.J35671.1.p|PACid:30198606	-1.3682	0.387374	<.0001	2	Functional enzyme	AT3G22600.1	Bifunctional inhibitor/lipid-transfer protein/seed storage 2S albumin superfamily protein
D1W	2233	Pavir.Ib00563.1	30237287	Pavir.Ib00563.1.p|PACid:30237287	-1.3642	0.38845	<.0001	12	Functional enzyme	AT1G22440.1	Zinc-binding alcohol dehydrogenase family protein
D1W	6317	Pavir.Ib03031.1	30238502	Pavir.Ib03031.1.p|PACid:30238502	-1.3563	0.390583	0.0002	3	Functional enzyme	AT2G37540.1	NAD(P)-binding Rossmann-fold superfamily protein
D1W	2077	Pavir.Aa02744.1	30253163	Pavir.Aa02744.1.p|PACid:30253163	-1.3458	0.393436	<.0001	10	Functional enzyme	AT5G45910.1	GDSL-like Lipase/Acylhydrolase superfamily protein
D1W	1621	Pavir.J37601.1	30220682	Pavir.J37601.1.p|PACid:30220682	-1.3378	0.395623	<.0001	7	Functional enzyme	AT2G37130.1	Peroxidase superfamily protein
D1W	6711	Pavir.Ia00847.1	30214209	Pavir.Ia00847.1.p|PACid:30214209	-1.3377	0.395651	<.0001	5	Functional enzyme	AT1G65820.1	microsomal glutathione s-transferase, putative
D1W	4031	Pavir.J04379.1	30216529	Pavir.J04379.1.p|PACid:30216529	-1.3237	0.399509	<.0001	9	Functional enzyme	AT3G22600.1	Bifunctional inhibitor/lipid-transfer protein/seed storage 2S albumin superfamily protein
D1W	1306	Pavir.Ab02963.1	30233340	Pavir.Ab02963.1.p|PACid:30233340	-1.3197	0.400618	<.0001	7	Functional enzyme	AT1G10290.1	dynamin-like protein 6
D1W	657	Pavir.Aa00741.1	30253578	Pavir.Aa00741.1.p|PACid:30253578	-1.31607	0.401628	<.0001	21	Functional enzyme	AT1G10290.1	dynamin-like protein 6
D1W	2704	Pavir.Ia04122.1	30214938	Pavir.Ia04122.1.p|PACid:30214938	-1.307	0.40416	<.0001	5	Functional enzyme	AT1G22440.1	Zinc-binding alcohol dehydrogenase family protein
D1W	7400	Pavir.Ha00164.1	30318160	Pavir.Ha00164.1.p|PACid:30318160	-1.3046	0.404833	0.0226	2	Functional enzyme	AT5G06060.1	NAD(P)-binding Rossmann-fold superfamily protein
D1W	2895	Pavir.J35250.1	30208528	Pavir.J35250.1.p|PACid:30208528	-1.2991	0.40638	<.0001	7	Functional enzyme	AT5G45910.1	GDSL-like Lipase/Acylhydrolase superfamily protein
D1W	2640	Pavir.Da01997.1	30193286	Pavir.Da01997.1.p|PACid:30193286	-1.2963	0.407169	<.0001	6	Functional enzyme	AT1G01800.1	NAD(P)-binding Rossmann-fold superfamily protein
D1W	5974	Pavir.Ba04020.1	30293546	Pavir.Ba04020.1.p|PACid:30293546	-1.2883	0.409433	0.0005	2	Functional enzyme	AT2G32300.1	uclacyanin 1
D1W	6956	Pavir.J28739.1	30258847	Pavir.J28739.1.p|PACid:30258847	-1.2859	0.410115	<.0001	4	Functional enzyme	AT1G28600.2	GDSL-like Lipase/Acylhydrolase superfamily protein
D1W	2431	Pavir.Ea01116.1	30230563	Pavir.Ea01116.1.p|PACid:30230563	-1.2821	0.411197	<.0001	4	Functional enzyme	AT5G64120.1	Peroxidase superfamily protein
D1W	1643	Pavir.Ab00530.1	30233882	Pavir.Ab00530.1.p|PACid:30233882	-1.27459	0.413343	<.0001	22	Functional enzyme	AT2G36780.1	UDP-Glycosyltransferase superfamily protein
D1W	4435	Pavir.J30717.1	30273308	Pavir.J30717.1.p|PACid:30273308	-1.2716	0.4142	<.0001	3	Functional enzyme	AT4G13180.1	NAD(P)-binding Rossmann-fold superfamily protein
D1W	6763	Pavir.Ab00657.1	30235228	Pavir.Ab00657.1.p|PACid:30235228	-1.2691	0.414919	0.0013	2	Functional enzyme	AT2G04570.1	GDSL-like Lipase/Acylhydrolase superfamily protein
D1W	6646	Pavir.J01637.1	30315473	Pavir.J01637.1.p|PACid:30315473	-1.2652	0.416042	<.0001	3	Functional enzyme	AT2G26100.1	Galactosyltransferase family protein
D1W	3862	Pavir.Ab02079.1	30233879	Pavir.Ab02079.1.p|PACid:30233879	-1.2613	0.417168	<.0001	6	Functional enzyme	AT5G25140.1	cytochrome P450, family 71, subfamily B, polypeptide 13
D1W	3798	Pavir.Eb02277.1	30309157	Pavir.Eb02277.1.p|PACid:30309157	-1.2606	0.41737	<.0001	3	Functional enzyme	AT5G19440.1	NAD(P)-binding Rossmann-fold superfamily protein
D1W	6325	Pavir.Gb00184.1	30223967	Pavir.Gb00184.1.p|PACid:30223967	-1.2507	0.420244	<.0001	3	Functional enzyme	AT4G30210.1	P450 reductase 2
D1W	1904	Pavir.Eb00209.1	30311479	Pavir.Eb00209.1.p|PACid:30311479	-1.2426	0.42261	<.0001	6	Functional enzyme	AT5G45910.1	GDSL-like Lipase/Acylhydrolase superfamily protein
D1W	4835	Pavir.J38590.1	30221277	Pavir.J38590.1.p|PACid:30221277	-1.2388	0.423725	<.0001	5	Functional enzyme	AT4G30210.2	P450 reductase 2
D1W	3709	Pavir.J24201.1	30188906	Pavir.J24201.1.p|PACid:30188906	-1.2338	0.425196	0.0004	3	Functional enzyme	AT5G42180.1	Peroxidase superfamily protein
D1W	1919	Pavir.Bb00681.1	30300106	Pavir.Bb00681.1.p|PACid:30300106	-1.2331	0.425402	<.0001	10	Functional enzyme	AT4G14930.1	Survival protein SurE-like phosphatase/nucleotidase
D1W	4715	Pavir.J40282.1	30246252	Pavir.J40282.1.p|PACid:30246252	-1.2274	0.427086	0.0251	2	Functional enzyme	AT5G37690.1	SGNH hydrolase-type esterase superfamily protein
D1W	3774	Pavir.J21406.1	30254693	Pavir.J21406.1.p|PACid:30254693	-1.22	0.429283	<.0001	5	Functional enzyme	AT5G66390.1	Peroxidase superfamily protein
D1W	6380	Pavir.J01296.1	30216393	Pavir.J01296.1.p|PACid:30216393	-1.2197	0.429372	<.0001	5	Functional enzyme	AT5G04500.1	glycosyltransferase family protein 47
D1W	2188	Pavir.J03055.1	30248820	Pavir.J03055.1.p|PACid:30248820	-1.2191	0.429551	0.0067	2	Functional enzyme	AT5G61840.1	Exostosin family protein
D1W	5544	Pavir.J18194.1	30255395	Pavir.J18194.1.p|PACid:30255395	1.2682	2.40861	<.0001	6	Functional enzyme	AT5G46940.1	Plant invertase/pectin methylesterase inhibitor superfamily protein
D1W	5569	Pavir.J37309.1	30271745	Pavir.J37309.1.p|PACid:30271745	1.3336	2.52031	<.0001	4	Functional enzyme	AT4G37560.1	Acetamidase/Formamidase family protein
D1W	3440	Pavir.Gb01868.1	30222408	Pavir.Gb01868.1.p|PACid:30222408	1.346	2.54206	<.0001	9	Functional enzyme	AT5G05960.1	Bifunctional inhibitor/lipid-transfer protein/seed storage 2S albumin superfamily protein
D1W	1818	Pavir.J08895.1	30257540	Pavir.J08895.1.p|PACid:30257540	1.3888	2.61861	<.0001	14	Functional enzyme	AT3G03080.1	Zinc-binding dehydrogenase family protein
D1W	3069	Pavir.Da00805.1	30193261	Pavir.Da00805.1.p|PACid:30193261	1.5301	2.88806	<.0001	5	Functional enzyme	AT4G20860.1	FAD-binding Berberine family protein
D1W	3546	Pavir.Da00087.1	30194507	Pavir.Da00087.1.p|PACid:30194507	1.5755	2.98039	<.0001	13	Functional enzyme	AT3G20570.1	early nodulin-like protein 9
D1W	2489	Pavir.J26569.1	30248154	Pavir.J26569.1.p|PACid:30248154	1.6788	3.20162	<.0001	8	Functional enzyme	AT3G60130.1	beta glucosidase 16
D1W	4195	Pavir.J15786.1	30195529	Pavir.J15786.1.p|PACid:30195529	1.9826	3.95205	<.0001	6	Functional enzyme	AT1G71695.1	Peroxidase superfamily protein
D1W	7019	Pavir.Ea03391.1	30231527	Pavir.Ea03391.1.p|PACid:30231527	1.983	3.95314	<.0001	2	Functional enzyme	AT5G05960.1	Bifunctional inhibitor/lipid-transfer protein/seed storage 2S albumin superfamily protein
D1W	3415	Pavir.Da00146.1	30192844	Pavir.Da00146.1.p|PACid:30192844	2.5498	5.85553	<.0001	3	Functional enzyme	AT4G30170.1	Peroxidase family protein
D1W	6144	Pavir.J00683.1	30255035	Pavir.J00683.1.p|PACid:30255035	2.6179	6.13856	<.0001	4	Functional enzyme	AT5G05960.1	Bifunctional inhibitor/lipid-transfer protein/seed storage 2S albumin superfamily protein
D1W	393	Pavir.Eb03677.1	30313434	Pavir.Eb03677.1.p|PACid:30313434	-1.6665	0.315017	<.0001	13	Glycolysis	AT3G55440.1	triosephosphate isomerase
D1W	77	Pavir.Ab00183.1	30232747	Pavir.Ab00183.1.p|PACid:30232747	-1.5432	0.343124	<.0001	6	Glycolysis	AT5G17310.2	UDP-glucose pyrophosphorylase 2
D1W	1	Pavir.J02390.1	30246794	Pavir.J02390.1.p|PACid:30246794	-1.511	0.350868	<.0001	2	Glycolysis	AT3G04120.1	glyceraldehyde-3-phosphate dehydrogenase C subunit 1
D1W	530	Pavir.Ab03085.1	30236392	Pavir.Ab03085.1.p|PACid:30236392	-1.3817	0.383766	<.0001	13	Glycolysis	AT1G76550.1	Phosphofructokinase family protein
D1W	450	Pavir.Aa00632.1	30250637	Pavir.Aa00632.1.p|PACid:30250637	-1.37884	0.384528	<.0001	22	Glycolysis	AT1G76550.1	Phosphofructokinase family protein
D1W	3049	Pavir.Ba01841.1	30293900	Pavir.Ba01841.1.p|PACid:30293900	-1.3299	0.397796	<.0001	2	Glycolysis	AT2G22480.1	phosphofructokinase 5
D1W	1392	Pavir.Ib01135.1	30240387	Pavir.Ib01135.1.p|PACid:30240387	-1.3085	0.40374	0.0014	2	Glycolysis	AT2G29560.1	cytosolic enolase
D1W	57	Pavir.Ab01424.1	30234285	Pavir.Ab01424.1.p|PACid:30234285	-1.2785	0.412224	<.0001	4	Glycolysis	AT2G36460.1	Aldolase superfamily protein
D1W	6360	Pavir.Ga01407.1	30304106	Pavir.Ga01407.1.p|PACid:30304106	1.3522	2.55301	<.0001	4	Glycolysis	AT5G47810.1	phosphofructokinase 2
D1W	1092	Pavir.Ib01540.1	30237822	Pavir.Ib01540.1.p|PACid:30237822	1.7328	3.32372	<.0001	12	Glycolysis	AT3G08590.1	Phosphoglycerate mutase, 2,3-bisphosphoglycerate-independent
D1W	5330	Pavir.Cb00901.1	30269979	Pavir.Cb00901.1.p|PACid:30269979	-2.4112	0.187999	<.0001	3	Lipids metabolism	AT4G25050.1	acyl carrier protein 4
D1W	6141	Pavir.Fb02310.1	30278297	Pavir.Fb02310.1.p|PACid:30278297	-1.6391	0.321057	<.0001	3	Lipids metabolism	AT1G54580.1	acyl carrier protein 2
D1W	2567	Pavir.J00012.1	30190422	Pavir.J00012.1.p|PACid:30190422	-1.6367	0.321591	<.0001	8	Lipids metabolism	AT3G06860.1	multifunctional protein 2
D1W	2586	Pavir.J10514.1	30195162	Pavir.J10514.1.p|PACid:30195162	-1.5797	0.334551	0.0005	3	Lipids metabolism	AT1G48320.1	Thioesterase superfamily protein
D1W	7965	Pavir.Bb00982.1	30296598	Pavir.Bb00982.1.p|PACid:30296598	-1.547	0.342221	0.0004	2	Lipids metabolism	AT1G08510.1	fatty acyl-ACP thioesterases B
D1W	1921	Pavir.Cb01371.1	30269906	Pavir.Cb01371.1.p|PACid:30269906	-1.5136	0.350236	<.0001	14	Lipids metabolism	AT3G06860.1	multifunctional protein 2
D1W	7451	Pavir.J01656.1	30207618	Pavir.J01656.1.p|PACid:30207618	-1.3711	0.386596	<.0001	4	Lipids metabolism	AT1G65290.1	mitochondrial acyl carrier protein 2
D1W	6875	Pavir.Ha00727.1	30317795	Pavir.Ha00727.1.p|PACid:30317795	-1.3692	0.387106	<.0001	3	Lipids metabolism	AT5G23670.1	long chain base2
D1W	8291	Pavir.J36549.1	30254234	Pavir.J36549.1.p|PACid:30254234	-1.3636	0.388611	<.0001	4	Lipids metabolism	AT3G44540.1	fatty acid reductase 4
D1W	8631	Pavir.J02634.1	30254650	Pavir.J02634.1.p|PACid:30254650	-1.3462	0.393327	<.0001	4	Lipids metabolism	AT4G01950.1	glycerol-3-phosphate acyltransferase 3
D1W	953	Pavir.Ea04042.1	30230500	Pavir.Ea04042.1.p|PACid:30230500	-1.34172	0.39455	<.0001	27	Lipids metabolism	AT3G45070.1	P-loop containing nucleoside triphosphate hydrolases superfamily protein
D1W	7466	Pavir.Ib01656.1	30240125	Pavir.Ib01656.1.p|PACid:30240125	-1.2855	0.410229	0.0001	2	Lipids metabolism	AT1G65290.1	mitochondrial acyl carrier protein 2
D1W	2098	Pavir.Cb00887.1	30270382	Pavir.Cb00887.1.p|PACid:30270382	-1.2767	0.412739	<.0001	7	Lipids metabolism	AT3G05420.2	acyl-CoA binding protein 4
D1W	2903	Pavir.J01167.1	30243086	Pavir.J01167.1.p|PACid:30243086	-1.26782	0.415287	<.0001	8	Lipids metabolism	AT5G36880.2	acetyl-CoA synthetase
D1W	7273	Pavir.Ab01298.1	30233462	Pavir.Ab01298.1.p|PACid:30233462	-1.2481	0.421002	0.0008	2	Lipids metabolism	AT3G02040.1	senescence-related gene 3
D1W	364	Pavir.Aa02663.1	30249779	Pavir.Aa02663.1.p|PACid:30249779	-1.22724	0.427134	<.0001	14	Lipids metabolism	AT4G29010.1	Enoyl-CoA hydratase/isomerase family
D1W	5701	Pavir.Aa01512.1	30252328	Pavir.Aa01512.1.p|PACid:30252328	1.2757	2.42116	0.0004	3	Lipids metabolism	AT1G47480.1	alpha/beta-Hydrolases superfamily protein
D1W	78	Pavir.J40862.1	30201738	Pavir.J40862.1.p|PACid:30201738	-2.1082	0.231936	<.0001	4	Major CHO metabolism	AT4G10260.1	pfkB-like carbohydrate kinase family protein
D1W	81	Pavir.Fa02199.1	30185615	Pavir.Fa02199.1.p|PACid:30185615	-1.7968	0.287812	<.0001	7	Major CHO metabolism	AT4G10260.1	pfkB-like carbohydrate kinase family protein
D1W	182	Pavir.J02298.1	30207734	Pavir.J02298.1.p|PACid:30207734	-1.79549	0.288074	<.0001	29	Major CHO metabolism	AT4G10260.1	pfkB-like carbohydrate kinase family protein
D1W	1237	Pavir.J39089.1	30216406	Pavir.J39089.1.p|PACid:30216406	-1.52375	0.347781	<.0001	13	Major CHO metabolism	AT1G06020.1	pfkB-like carbohydrate kinase family protein
D1W	144	Pavir.Ib01813.1	30239425	Pavir.Ib01813.1.p|PACid:30239425	-1.52062	0.348536	<.0001	161	Major CHO metabolism	AT3G43190.1	sucrose synthase 4
D1W	417	Pavir.J00648.1	30281996	Pavir.J00648.1.p|PACid:30281996	-1.28762	0.409626	<.0001	16	Major CHO metabolism	AT2G31390.1	pfkB-like carbohydrate kinase family protein
D1W	192	Pavir.J00504.1	30220221	Pavir.J00504.1.p|PACid:30220221	-1.2874	0.409689	<.0001	4	Major CHO metabolism	AT4G29130.1	hexokinase 1
D1W	3744	Pavir.Ia01620.1	30212639	Pavir.Ia01620.1.p|PACid:30212639	-1.2838	0.410712	<.0001	4	Major CHO metabolism	AT2G19860.1	hexokinase 2
D1W	3895	Pavir.Gb00742.1	30221692	Pavir.Gb00742.1.p|PACid:30221692	-1.2654	0.415984	0.0007	2	Major CHO metabolism	AT1G62660.1	Glycosyl hydrolases family 32 protein
D1W	3615	Pavir.J09198.1	30218083	Pavir.J09198.1.p|PACid:30218083	1.2338	2.35186	0.0012	5	Major CHO metabolism	AT1G27680.1	ADPGLC-PPase large subunit
D1W	1380	Pavir.Fb00791.1	30280037	Pavir.Fb00791.1.p|PACid:30280037	1.2393	2.36084	<.0001	11	Major CHO metabolism	AT5G48300.1	ADP glucose pyrophosphorylase 1
D1W	536	Pavir.J19251.1	30258484	Pavir.J19251.1.p|PACid:30258484	-1.7728	0.29264	<.0001	8	Metal binding	AT3G17390.1	S-adenosylmethionine synthetase family protein
D1W	65	Pavir.J10341.1	30191141	Pavir.J10341.1.p|PACid:30191141	-1.57056	0.336678	<.0001	22	Metal binding	AT3G17390.1	S-adenosylmethionine synthetase family protein
D1W	70	Pavir.Eb01268.1	30313696	Pavir.Eb01268.1.p|PACid:30313696	-1.4264	0.372058	<.0001	31	Metal binding	AT3G17390.1	S-adenosylmethionine synthetase family protein
D1W	6067	Pavir.Ib01442.1	30236856	Pavir.Ib01442.1.p|PACid:30236856	-1.4106	0.376155	<.0001	4	Metal binding	AT1G09240.1	nicotianamine synthase 3
D1W	4797	Pavir.Ga01942.1	30304347	Pavir.Ga01942.1.p|PACid:30304347	-1.3407	0.394829	<.0001	7	Metal binding	AT5G63530.1	farnesylated protein 3
D1W	7685	Pavir.Ea00501.1	30230246	Pavir.Ea00501.1.p|PACid:30230246	2.1767	4.52118	<.0001	2	Metal binding	AT3G09390.1	metallothionein 2A
D1W	1169	Pavir.Bb00541.1	30298869	Pavir.Bb00541.1.p|PACid:30298869	-1.3866	0.382465	<.0001	6	Minor CHO metabolism	AT1G55120.1	beta-fructofuranosidase 5
D1W	5905	Pavir.Fb01844.1	30278101	Pavir.Fb01844.1.p|PACid:30278101	-1.3818	0.38374	<.0001	2	Minor CHO metabolism	AT1G55740.1	seed imbibition 1
D1W	6282	Pavir.J15860.1	30275456	Pavir.J15860.1.p|PACid:30275456	1.8609	3.63234	<.0001	6	Minor CHO metabolism	AT2G37770.2	NAD(P)-linked oxidoreductase superfamily protein
D1W	7655	Pavir.Ab01160.1	30232047	Pavir.Ab01160.1.p|PACid:30232047	-2.441	0.184156	<.0001	2	Mitochondrial electron transport / ATP synthesis	AT3G27620.1	alternative oxidase 1C
D1W	6834	Pavir.Gb00789.1	30223210	Pavir.Gb00789.1.p|PACid:30223210	-2.1227	0.229617	<.0001	2	Mitochondrial electron transport / ATP synthesis	AT3G22370.1	alternative oxidase 1A
D1W	4949	Pavir.Ea02163.1	30231351	Pavir.Ea02163.1.p|PACid:30231351	-1.5903	0.332102	<.0001	3	Mitochondrial electron transport / ATP synthesis	AT3G15640.1	Rubredoxin-like superfamily protein
D1W	23	Pavir.J01466.1	30195685	Pavir.J01466.1.p|PACid:30195685	-1.34738	0.393005	<.0001	7	Mitochondrial electron transport / ATP synthesis	AT5G08690.1	ATP synthase alpha/beta family protein
D1W	4430	Pavir.Ia00443.1	30209915	Pavir.Ia00443.1.p|PACid:30209915	-1.23919	0.42361	<.0001	16	Mitochondrial electron transport / ATP synthesis	AT1G79010.1	Alpha-helical ferredoxin
D1W	8851	Pavir.J22241.1	30302017	Pavir.J22241.1.p|PACid:30302017	1.5592	2.9469	<.0001	4	Mitochondrial electron transport / ATP synthesis	AT3G62790.1	NADH-ubiquinone oxidoreductase-related
D1W	6258	Pavir.Gb00236.1	30221953	Pavir.Gb00236.1.p|PACid:30221953	-2.319	0.200406	<.0001	2	Nucleotide metabolism	AT4G04955.1	allantoinase
D1W	2219	Pavir.J27938.1	30197087	Pavir.J27938.1.p|PACid:30197087	-1.4852	0.357199	<.0001	2	Nucleotide metabolism	AT5G28050.2	Cytidine/deoxycytidylate deaminase family protein
D1W	2350	Pavir.Ba00244.1	30292717	Pavir.Ba00244.1.p|PACid:30292717	-1.3676	0.387535	<.0001	9	Nucleotide metabolism	AT5G18280.1	apyrase 2
D1W	1473	Pavir.Eb02623.1	30308849	Pavir.Eb02623.1.p|PACid:30308849	-1.3034	0.40517	<.0001	11	Nucleotide metabolism	AT2G19570.1	cytidine deaminase 1
D1W	332	Pavir.J05124.1	30282534	Pavir.J05124.1.p|PACid:30282534	-1.29896	0.406419	<.0001	87	Nucleotide metabolism	AT5G26667.2	P-loop containing nucleoside triphosphate hydrolases superfamily protein
D1W	5675	Pavir.Ca00257.1	30206816	Pavir.Ca00257.1.p|PACid:30206816	-1.2775	0.41251	<.0001	7	Nucleotide metabolism	AT5G63980.1	Inositol monophosphatase family protein
D1W	2590	Pavir.Fb00387.1	30278428	Pavir.Fb00387.1.p|PACid:30278428	-1.3094	0.403489	<.0001	7	Pentose phosphate pathway	AT1G12230.1	Aldolase superfamily protein
D1W	2556	Pavir.Ea01573.1	30227608	Pavir.Ea01573.1.p|PACid:30227608	-2.0608	0.239683	<.0001	8	Phyto-hormone metabolism	AT2G19590.1	ACC oxidase 1
D1W	2021	Pavir.J10323.1	30190884	Pavir.J10323.1.p|PACid:30190884	-1.9669	0.255802	<.0001	12	Phyto-hormone metabolism	AT2G19590.1	ACC oxidase 1
D1W	695	Pavir.Ca00561.1	30204121	Pavir.Ca00561.1.p|PACid:30204121	-1.7528	0.296725	<.0001	21	Phyto-hormone metabolism	AT1G76680.1	12-oxophytodienoate reductase 1
D1W	1484	Pavir.J38838.1	30216493	Pavir.J38838.1.p|PACid:30216493	-1.7433	0.298686	<.0001	3	Phyto-hormone metabolism	AT1G52820.1	2-oxoglutarate (2OG) and Fe(II)-dependent oxygenase superfamily protein
D1W	2381	Pavir.Da01421.1	30193516	Pavir.Da01421.1.p|PACid:30193516	-1.5062	0.352037	<.0001	7	Phyto-hormone metabolism	AT1G76690.1	12-oxophytodienoate reductase 2
D1W	2466	Pavir.J18668.1	30243274	Pavir.J18668.1.p|PACid:30243274	-1.4875	0.35663	<.0001	2	Phyto-hormone metabolism	AT2G43820.1	UDP-glucosyltransferase 74F2
D1W	2441	Pavir.Ib00338.1	30242341	Pavir.Ib00338.1.p|PACid:30242341	-1.4788	0.358787	<.0001	8	Phyto-hormone metabolism	AT1G20330.1	sterol methyltransferase 2
D1W	1182	Pavir.Fb00898.1	30278751	Pavir.Fb00898.1.p|PACid:30278751	-1.4781	0.358961	0.0031	3	Phyto-hormone metabolism	AT5G47530.1	Auxin-responsive family protein
D1W	973	Pavir.Fa01460.1	30186173	Pavir.Fa01460.1.p|PACid:30186173	-1.4257	0.372239	0.0003	4	Phyto-hormone metabolism	AT5G47530.1	Auxin-responsive family protein
D1W	7465	Pavir.Ib01045.1	30240697	Pavir.Ib01045.1.p|PACid:30240697	-1.4227	0.373014	<.0001	3	Phyto-hormone metabolism	AT5G42560.1	Abscisic acid-responsive (TB2/DP1, HVA22) family protein
D1W	8248	Pavir.Ab01548.1	30234360	Pavir.Ab01548.1.p|PACid:30234360	-1.4049	0.377644	<.0001	3	Phyto-hormone metabolism	AT1G50430.1	Ergosterol biosynthesis ERG4/ERG24 family
D1W	7561	Pavir.Fa01685.1	30185914	Pavir.Fa01685.1.p|PACid:30185914	-1.3958	0.380034	0.0004	2	Phyto-hormone metabolism	AT1G52820.1	2-oxoglutarate (2OG) and Fe(II)-dependent oxygenase superfamily protein
D1W	8640	Pavir.Eb00670.1	30312602	Pavir.Eb00670.1.p|PACid:30312602	-1.3609	0.389339	<.0001	2	Phyto-hormone metabolism	AT3G02580.1	sterol 1
D1W	371	Pavir.J38101.1	30254430	Pavir.J38101.1.p|PACid:30254430	-1.3284	0.39821	<.0001	9	Phyto-hormone metabolism	AT2G06050.1	oxophytodienoate-reductase 3
D1W	1486	Pavir.Aa01780.1	30253873	Pavir.Aa01780.1.p|PACid:30253873	-1.3253	0.399066	<.0001	15	Phyto-hormone metabolism	AT4G02780.1	Terpenoid cyclases/Protein prenyltransferases superfamily protein
D1W	5009	Pavir.Fb01961.1	30278218	Pavir.Fb01961.1.p|PACid:30278218	-1.2993	0.406323	<.0001	4	Phyto-hormone metabolism	AT4G17280.1	Auxin-responsive family protein
D1W	8050	Pavir.Fb00552.1	30278131	Pavir.Fb00552.1.p|PACid:30278131	-1.2928	0.408158	0.0003	2	Phyto-hormone metabolism	AT5G04370.2	S-adenosyl-L-methionine-dependent methyltransferases superfamily protein
D1W	1391	Pavir.Db00058.1	30259900	Pavir.Db00058.1.p|PACid:30259900	-1.26444	0.416261	<.0001	14	Phyto-hormone metabolism	AT3G19820.1	cell elongation protein / DWARF1 / DIMINUTO (DIM)
D1W	7576	Pavir.Da00043.1	30194456	Pavir.Da00043.1.p|PACid:30194456	-1.2534	0.419459	0.0036	2	Phyto-hormone metabolism	AT1G44350.1	IAA-leucine resistant (ILR)-like gene 6
D1W	1985	Pavir.Fb01387.1	30279215	Pavir.Fb01387.1.p|PACid:30279215	1.361	2.56863	<.0001	5	Phyto-hormone metabolism	AT2G42680.1	multiprotein bridging factor 1A
D1W	8378	Pavir.J06494.1	30286195	Pavir.J06494.1.p|PACid:30286195	1.95139	3.86747	<.0001	2	Phyto-hormone metabolism	AT2G14900.1	Gibberellin-regulated family protein
D1W	5139	Pavir.J10403.1	30271807	Pavir.J10403.1.p|PACid:30271807	-2.4145	0.18757	<.0001	5	Protein degradation	AT5G60710.1	Zinc finger (C3HC4-type RING finger) family protein
D1W	1937	Pavir.Da00120.1	30194276	Pavir.Da00120.1.p|PACid:30194276	-1.6842	0.311175	<.0001	8	Protein degradation	AT5G43060.1	Granulin repeat cysteine protease family protein
D1W	9008	Pavir.Ga00581.1	30303618	Pavir.Ga00581.1.p|PACid:30303618	-1.6798	0.312126	0.0003	2	Protein degradation	AT3G50710.1	F-box/RNI-like/FBD-like domains-containing protein
D1W	4048	Pavir.Ib03057.1	30239224	Pavir.Ib03057.1.p|PACid:30239224	-1.5362	0.344792	0.0002	2	Protein degradation	AT4G19006.1	Proteasome component (PCI) domain protein
D1W	2683	Pavir.Cb00329.1	30269331	Pavir.Cb00329.1.p|PACid:30269331	-1.5312	0.345989	<.0001	18	Protein degradation	AT5G60710.1	Zinc finger (C3HC4-type RING finger) family protein
D1W	2949	Pavir.J40969.1	30255213	Pavir.J40969.1.p|PACid:30255213	-1.4872	0.356704	0.0006	2	Protein degradation	AT5G42790.1	proteasome alpha subunit F1
D1W	6464	Pavir.Bb03517.1	30300478	Pavir.Bb03517.1.p|PACid:30300478	-1.38477	0.382951	<.0001	4	Protein degradation	AT5G57860.1	Ubiquitin-like superfamily protein
D1W	6605	Pavir.Ba01076.1	30289764	Pavir.Ba01076.1.p|PACid:30289764	-1.2927	0.408186	<.0001	2	Protein degradation	AT2G21470.1	SUMO-activating enzyme 2
D1W	6659	Pavir.Ga00922.1	30304858	Pavir.Ga00922.1.p|PACid:30304858	-1.2764	0.412824	<.0001	2	Protein degradation	AT1G62710.1	beta vacuolar processing enzyme
D1W	6035	Pavir.Aa03301.1	30250680	Pavir.Aa03301.1.p|PACid:30250680	-1.2456	0.421732	0.0006	2	Protein degradation	AT1G50670.1	OTU-like cysteine protease family protein
D1W	3810	Pavir.Ia02688.1	30214364	Pavir.Ia02688.1.p|PACid:30214364	-1.2345	0.42499	0.0001	2	Protein degradation	AT4G19006.1	Proteasome component (PCI) domain protein
D1W	1219	Pavir.Eb01821.1	30314014	Pavir.Eb01821.1.p|PACid:30314014	-1.2337	0.425225	<.0001	3	Protein degradation	AT2G26140.1	FTSH protease 4
D1W	2075	Pavir.Ca00948.1	30205106	Pavir.Ca00948.1.p|PACid:30205106	-1.233	0.425432	0.0004	2	Protein degradation	AT1G11910.1	aspartic proteinase A1
D1W	5551	Pavir.Ia03233.1	30213369	Pavir.Ia03233.1.p|PACid:30213369	-1.2289	0.426643	<.0001	3	Protein degradation	AT2G27920.1	serine carboxypeptidase-like 51
D1W	2022	Pavir.Ib03921.1	30238285	Pavir.Ib03921.1.p|PACid:30238285	-1.21938	0.429467	<.0001	15	Protein degradation	AT5G67360.1	Subtilase family protein
D1W	7546	Pavir.Aa02730.1	30249193	Pavir.Aa02730.1.p|PACid:30249193	-1.8104	0.285112	<.0001	2	Protein modification	AT5G53140.1	Protein phosphatase 2C family protein
D1W	3900	Pavir.Ga01812.1	30303684	Pavir.Ga01812.1.p|PACid:30303684	-1.7041	0.306913	<.0001	4	Protein modification	AT1G10940.1	Protein kinase superfamily protein
D1W	4391	Pavir.J26298.1	30195280	Pavir.J26298.1.p|PACid:30195280	-1.6805	0.311974	<.0001	2	Protein modification	AT1G10940.1	Protein kinase superfamily protein
D1W	5516	Pavir.Ab00120.1	30234536	Pavir.Ab00120.1.p|PACid:30234536	-1.4595	0.363619	<.0001	2	Protein modification	AT2G17890.1	calcium-dependent protein kinase 16
D1W	4059	Pavir.Bb01945.1	30299145	Pavir.Bb01945.1.p|PACid:30299145	-1.3894	0.381724	<.0001	8	Protein modification	AT5G08160.1	serine/threonine protein kinase 3
D1W	4601	Pavir.Fb01324.1	30281277	Pavir.Fb01324.1.p|PACid:30281277	-1.3211	0.40023	<.0001	5	Protein modification	AT2G24765.1	ADP-ribosylation factor 3
D1W	7408	Pavir.J38690.1	30217709	Pavir.J38690.1.p|PACid:30217709	-1.2681	0.415206	<.0001	2	Protein modification	AT2G40730.1	Protein kinase family protein with ARM repeat domain
D1W	5882	Pavir.Ba02182.1	30289090	Pavir.Ba02182.1.p|PACid:30289090	-1.2614	0.417139	<.0001	3	Protein modification	AT5G08160.1	serine/threonine protein kinase 3
D1W	5369	Pavir.J31861.1	30202371	Pavir.J31861.1.p|PACid:30202371	-1.9639	0.256335	<.0001	2	Protein synthesis	AT1G15250.1	Zinc-binding ribosomal protein family protein
D1W	7324	Pavir.Ab01361.1	30235021	Pavir.Ab01361.1.p|PACid:30235021	-1.92878	0.262651	<.0001	4	Protein synthesis	AT2G04520.1	Nucleic acid-binding, OB-fold-like protein
D1W	9813	Pavir.Bb01837.1	30298804	Pavir.Bb01837.1.p|PACid:30298804	-1.9257	0.263213	<.0001	2	Protein synthesis	AT4G14320.1	Zinc-binding ribosomal protein family protein
D1W	8491	Pavir.Ba03742.1	30293352	Pavir.Ba03742.1.p|PACid:30293352	-1.9023	0.267517	<.0001	10	Protein synthesis	AT4G16720.1	Ribosomal protein L23/L15e family protein
D1W	4918	Pavir.Da00532.1	30192104	Pavir.Da00532.1.p|PACid:30192104	-1.895	0.268874	<.0001	7	Protein synthesis	AT4G29390.1	Ribosomal protein S30 family protein
D1W	1646	Pavir.J04506.2	30271067	Pavir.J04506.2.p|PACid:30271067	-1.7723	0.292742	<.0001	2	Protein synthesis	AT1G02780.1	Ribosomal protein L19e family protein
D1W	1456	Pavir.Ha00023.1	30316909	Pavir.Ha00023.1.p|PACid:30316909	-1.7483	0.297652	<.0001	6	Protein synthesis	AT1G02780.1	Ribosomal protein L19e family protein
D1W	5049	Pavir.Fb00053.1	30278567	Pavir.Fb00053.1.p|PACid:30278567	-1.72715	0.302048	<.0001	9	Protein synthesis	AT5G24510.1	60S acidic ribosomal protein family
D1W	4209	Pavir.Aa00121.1	30252855	Pavir.Aa00121.1.p|PACid:30252855	-1.7224	0.303044	<.0001	4	Protein synthesis	AT3G16080.1	Zinc-binding ribosomal protein family protein
D1W	4479	Pavir.Aa02064.1	30250661	Pavir.Aa02064.1.p|PACid:30250661	-1.67495	0.313177	<.0001	22	Protein synthesis	AT5G02610.1	Ribosomal L29 family protein
D1W	4785	Pavir.Ea00990.1	30231115	Pavir.Ea00990.1.p|PACid:30231115	-1.59856	0.330206	<.0001	12	Protein synthesis	AT3G06680.1	Ribosomal L29e protein family
D1W	298	Pavir.Db00244.1	30259941	Pavir.Db00244.1.p|PACid:30259941	-1.5366	0.344697	<.0001	2	Protein synthesis	AT3G13920.1	eukaryotic translation initiation factor 4A1
D1W	3268	Pavir.J16816.1	30301779	Pavir.J16816.1.p|PACid:30301779	-1.4784	0.358887	<.0001	3	Protein synthesis	AT4G20980.1	Eukaryotic translation initiation factor 3 subunit 7 (eIF-3)
D1W	6765	Pavir.J14541.1	30218340	Pavir.J14541.1.p|PACid:30218340	-1.4288	0.37144	<.0001	2	Protein synthesis	AT2G40290.1	Eukaryotic translation initiation factor 2 subunit 1
D1W	7142	Pavir.J24304.1	30248250	Pavir.J24304.1.p|PACid:30248250	-1.4256	0.372265	<.0001	6	Protein synthesis	AT3G06680.1	Ribosomal L29e protein family
D1W	1751	Pavir.J10550.1	30285869	Pavir.J10550.1.p|PACid:30285869	-1.4159	0.374776	0.0003	2	Protein synthesis	AT3G16780.1	Ribosomal protein L19e family protein
D1W	4419	Pavir.Bb03594.1	30299157	Pavir.Bb03594.1.p|PACid:30299157	-1.41122	0.375994	<.0001	11	Protein synthesis	AT5G19510.1	Translation elongation factor EF1B/ribosomal protein S6 family protein
D1W	145	Pavir.J17932.1	30275182	Pavir.J17932.1.p|PACid:30275182	-1.3929	0.380799	<.0001	2	Protein synthesis	AT1G56070.1	Ribosomal protein S5/Elongation factor G/III/V family protein
D1W	2956	Pavir.Ba00424.1	30292203	Pavir.Ba00424.1.p|PACid:30292203	-1.3817	0.383766	<.0001	15	Protein synthesis	AT1G30230.1	Glutathione S-transferase, C-terminal-like;Translation elongation factor EF1B/ribosomal protein S6
D1W	1049	Pavir.Ia03695.1	30209438	Pavir.Ia03695.1.p|PACid:30209438	-1.3707	0.386704	<.0001	4	Protein synthesis	AT3G05060.1	NOP56-like pre RNA processing ribonucleoprotein
D1W	1935	Pavir.Bb03610.1	30300837	Pavir.Bb03610.1.p|PACid:30300837	-1.3569	0.39042	<.0001	3	Protein synthesis	AT5G27850.1	Ribosomal protein L18e/L15 superfamily protein
D1W	2452	Pavir.Bb03312.1	30298573	Pavir.Bb03312.1.p|PACid:30298573	-1.3561	0.390637	<.0001	3	Protein synthesis	AT1G70600.1	Ribosomal protein L18e/L15 superfamily protein
D1W	2823	Pavir.J11476.1	30275547	Pavir.J11476.1.p|PACid:30275547	-1.3496	0.392401	<.0001	4	Protein synthesis	AT4G20980.1	Eukaryotic translation initiation factor 3 subunit 7 (eIF-3)
D1W	529	Pavir.Bb02310.1	30297179	Pavir.Bb02310.1.p|PACid:30297179	-1.3479	0.392863	<.0001	2	Protein synthesis	AT4G34670.1	Ribosomal protein S3Ae
D1W	1077	Pavir.Bb03362.1	30296746	Pavir.Bb03362.1.p|PACid:30296746	-1.3297	0.397851	0.0005	2	Protein synthesis	AT5G10360.1	Ribosomal protein S6e
D1W	4550	Pavir.Fb00397.1	30280506	Pavir.Fb00397.1.p|PACid:30280506	-1.2899	0.408979	0.0002	3	Protein synthesis	AT1G26880.1	Ribosomal protein L34e superfamily protein
D1W	5512	Pavir.J28032.1	30195090	Pavir.J28032.1.p|PACid:30195090	-1.28067	0.411604	<.0001	4	Protein synthesis	AT1G71350.1	eukaryotic translation initiation factor SUI1 family protein
D1W	2741	Pavir.J04504.1	30257929	Pavir.J04504.1.p|PACid:30257929	-1.2766	0.412767	<.0001	5	Protein synthesis	AT5G02450.1	Ribosomal protein L36e family protein
D1W	7360	Pavir.Ia02294.1	30209464	Pavir.Ia02294.1.p|PACid:30209464	-1.2738	0.413569	<.0001	3	Protein synthesis	AT2G04520.1	Nucleic acid-binding, OB-fold-like protein
D1W	606	Pavir.Ia03410.1	30215013	Pavir.Ia03410.1.p|PACid:30215013	-1.2731	0.41377	<.0001	3	Protein synthesis	AT3G05590.1	ribosomal protein L18
D1W	2596	Pavir.Ab00583.1	30236280	Pavir.Ab00583.1.p|PACid:30236280	-1.27244	0.413959	<.0001	8	Protein synthesis	AT1G70600.1	Ribosomal protein L18e/L15 superfamily protein
D1W	5730	Pavir.J03744.1	30198003	Pavir.J03744.1.p|PACid:30198003	-1.2578	0.418181	<.0001	4	Protein synthesis	AT5G64670.1	Ribosomal protein L18e/L15 superfamily protein
D1W	2744	Pavir.J40883.1	30196491	Pavir.J40883.1.p|PACid:30196491	-1.25539	0.41888	<.0001	4	Protein synthesis	AT5G18380.1	Ribosomal protein S5 domain 2-like superfamily protein
D1W	7787	Pavir.Ha00348.1	30317636	Pavir.Ha00348.1.p|PACid:30317636	-1.2535	0.419429	0.0012	2	Protein synthesis	AT2G07734.1	Alpha-L RNA-binding motif/Ribosomal protein S4 family protein
D1W	7059	Pavir.Bb03566.1	30296699	Pavir.Bb03566.1.p|PACid:30296699	-1.2396	0.42349	<.0001	5	Protein synthesis	AT3G49080.1	Ribosomal protein S5 domain 2-like superfamily protein
D1W	3542	Pavir.J07714.2	30199885	Pavir.J07714.2.p|PACid:30199885	-1.2243	0.428005	<.0001	3	Protein synthesis	AT1G76810.1	eukaryotic translation initiation factor 2 (eIF-2) family protein
D1W	1561	Pavir.Ha01380.1	30318563	Pavir.Ha01380.1.p|PACid:30318563	-1.22401	0.428091	<.0001	14	Protein synthesis	AT2G05830.4	NagB/RpiA/CoA transferase-like superfamily protein
D1W	1253	Pavir.Ib03745.1	30240701	Pavir.Ib03745.1.p|PACid:30240701	-1.6574	0.31701	<.0001	3	Protein targeting & vesicle tansport	AT4G34660.1	SH3 domain-containing protein
D1W	1309	Pavir.Bb00665.1	30296629	Pavir.Bb00665.1.p|PACid:30296629	-1.629	0.323312	<.0001	3	Protein targeting & vesicle tansport	AT4G34450.1	coatomer gamma-2 subunit, putative / gamma-2 coat protein, putative / gamma-2 COP, putative
D1W	4779	Pavir.Gb00532.1	30221915	Pavir.Gb00532.1.p|PACid:30221915	-1.5481	0.34196	<.0001	7	Protein targeting & vesicle tansport	AT1G30630.1	Coatomer epsilon subunit
D1W	4928	Pavir.Ha00450.1	30317921	Pavir.Ha00450.1.p|PACid:30317921	-1.5265	0.347118	<.0001	5	Protein targeting & vesicle tansport	AT3G22950.1	ADP-ribosylation factor C1
D1W	5925	Pavir.Db01603.1	30261349	Pavir.Db01603.1.p|PACid:30261349	-1.5131	0.350358	<.0001	3	Protein targeting & vesicle tansport	AT1G52360.1	Coatomer, beta\' subunit
D1W	445	Pavir.J03896.1	30296206	Pavir.J03896.1.p|PACid:30296206	-1.4976	0.354142	<.0001	5	Protein targeting & vesicle tansport	AT4G09160.1	SEC14 cytosolic factor family protein / phosphoglyceride transfer family protein
D1W	8703	Pavir.J05027.1	30295842	Pavir.J05027.1.p|PACid:30295842	-1.3652	0.388181	0.001	2	Protein targeting & vesicle tansport	AT4G32940.1	gamma vacuolar processing enzyme
D1W	4555	Pavir.J25614.1	30190466	Pavir.J25614.1.p|PACid:30190466	-1.2895	0.409093	<.0001	3	Protein targeting & vesicle tansport	AT1G55840.1	Sec14p-like phosphatidylinositol transfer family protein
D1W	2654	Pavir.Db00430.1	30261760	Pavir.Db00430.1.p|PACid:30261760	-1.2522	0.419808	<.0001	3	Protein targeting & vesicle tansport	AT5G51430.1	conserved oligomeric Golgi complex component-related / COG complex component-related
D1W	4250	Pavir.Fb00352.1	30278788	Pavir.Fb00352.1.p|PACid:30278788	-1.2482	0.420973	0.0004	2	Protein targeting & vesicle tansport	AT4G21450.1	PapD-like superfamily protein
D1W	1582	Pavir.J38906.1	30287487	Pavir.J38906.1.p|PACid:30287487	-1.2304	0.426199	0.0005	2	Protein targeting & vesicle tansport	AT2G21390.1	Coatomer, alpha subunit
D1W	7772	Pavir.J40360.1	30196487	Pavir.J40360.1.p|PACid:30196487	-1.2256	0.42762	<.0001	3	Protein targeting & vesicle tansport	AT1G55840.1	Sec14p-like phosphatidylinositol transfer family protein
D1W	4716	Pavir.Da02234.1	30193156	Pavir.Da02234.1.p|PACid:30193156	-1.2176	0.429997	<.0001	4	Protein targeting & vesicle tansport	AT1G52360.1	Coatomer, beta\' subunit
D1W	2472	Pavir.J11658.1	30207612	Pavir.J11658.1.p|PACid:30207612	2.598	6.05447	<.0001	5	Protein targeting & vesicle tansport	AT4G16160.2	Mitochondrial import inner membrane translocase subunit Tim17/Tim22/Tim23 family protein
D1W	5378	Pavir.Aa01713.1	30248997	Pavir.Aa01713.1.p|PACid:30248997	-1.3671	0.38767	<.0001	4	Redox balance	AT1G35620.1	PDI-like 5-2
D1W	862	Pavir.Ia01927.1	30214132	Pavir.Ia01927.1.p|PACid:30214132	-1.3627	0.388854	<.0001	5	Redox balance	AT5G28840.1	GDP-D-mannose 3\',5\'-epimerase
D1W	4838	Pavir.Cb01062.1	30268082	Pavir.Cb01062.1.p|PACid:30268082	-1.3378	0.395623	0.0001	3	Redox balance	AT5G27380.1	glutathione synthetase 2
D1W	1304	Pavir.J34008.1	30216348	Pavir.J34008.1.p|PACid:30216348	-1.25641	0.418584	<.0001	15	Redox balance	AT1G04980.1	PDI-like 2-2
D1W	4417	Pavir.Ba00766.1	30290577	Pavir.Ba00766.1.p|PACid:30290577	-1.2312	0.425963	<.0001	7	Redox balance	AT3G20560.1	PDI-like 5-3
D1W	7638	Pavir.Ab02318.1	30235492	Pavir.Ab02318.1.p|PACid:30235492	1.3274	2.5095	0.0022	2	Redox balance	AT5G40370.1	Glutaredoxin family protein
D1W	7020	Pavir.Cb02005.1	30269140	Pavir.Cb02005.1.p|PACid:30269140	-1.7106	0.305533	<.0001	2	Regulation of transcription	AT5G64750.1	Integrase-type DNA-binding superfamily protein
D1W	2991	Pavir.J22823.1	30277951	Pavir.J22823.1.p|PACid:30277951	-1.4744	0.359883	<.0001	2	Regulation of transcription	AT2G41870.1	Remorin family protein
D1W	8215	Pavir.Ia04768.1	30211950	Pavir.Ia04768.1.p|PACid:30211950	-1.4603	0.363418	<.0001	4	Regulation of transcription	AT1G33240.1	GT-2-like 1
D1W	4520	Pavir.Ba00224.1	30292711	Pavir.Ba00224.1.p|PACid:30292711	-1.3685	0.387294	<.0001	2	Regulation of transcription	AT2G40620.1	Basic-leucine zipper (bZIP) transcription factor family protein
D1W	7420	Pavir.J04776.1	30243861	Pavir.J04776.1.p|PACid:30243861	-1.3545	0.39107	0.0002	2	Regulation of transcription	AT4G24630.1	DHHC-type zinc finger family protein
D1W	3711	Pavir.J18787.1	30246481	Pavir.J18787.1.p|PACid:30246481	-1.34	0.395021	<.0001	3	Regulation of transcription	N	N
D1W	7657	Pavir.Ia04290.1	30214379	Pavir.Ia04290.1.p|PACid:30214379	-1.2583	0.418036	<.0001	3	Regulation of transcription	AT2G16400.1	BEL1-like homeodomain 7
D1W	7946	Pavir.Aa02190.1	30253554	Pavir.Aa02190.1.p|PACid:30253554	1.4389	2.71114	<.0001	2	Regulation of transcription	AT1G13920.1	Remorin family protein
D1W	6315	Pavir.Ab03210.1	30233866	Pavir.Ab03210.1.p|PACid:30233866	1.8742	3.66598	<.0001	5	Regulation of transcription	AT5G23750.1	Remorin family protein
D1W	4001	Pavir.Ia04404.1	30211920	Pavir.Ia04404.1.p|PACid:30211920	4.4504	21.8627	<.0001	2	Regulation of transcription	AT5G42290.1	transcription activator-related
D1W	5217	Pavir.Da01321.1	30193825	Pavir.Da01321.1.p|PACid:30193825	-1.43016	0.37109	<.0001	7	RNA processing	AT5G65260.1	RNA-binding (RRM/RBD/RNP motifs) family protein
D1W	3963	Pavir.Ba01215.1	30290531	Pavir.Ba01215.1.p|PACid:30290531	1.727	3.31039	<.0001	7	RNA processing	AT1G14220.1	Ribonuclease T2 family protein
D1W	4543	Pavir.Cb00701.1	30268632	Pavir.Cb00701.1.p|PACid:30268632	-2.4361	0.184782	<.0001	3	S-assimilation	AT3G01910.1	sulfite oxidase
D1W	3656	Pavir.Ca02074.1	30206596	Pavir.Ca02074.1.p|PACid:30206596	-1.4115	0.375921	<.0001	6	S-assimilation	AT3G01910.1	sulfite oxidase
D1W	5311	Pavir.J21571.1	30208099	Pavir.J21571.1.p|PACid:30208099	-2.0789	0.236695	<.0001	5	Secondary metabolism	AT5G13930.1	Chalcone and stilbene synthase family protein
D1W	3969	Pavir.J20667.1	30219561	Pavir.J20667.1.p|PACid:30219561	-2.041	0.242995	<.0001	7	Secondary metabolism	AT5G13930.1	Chalcone and stilbene synthase family protein
D1W	3334	Pavir.Ia00185.1	30212273	Pavir.Ia00185.1.p|PACid:30212273	-1.9157	0.265043	<.0001	5	Secondary metabolism	AT3G55120.1	Chalcone-flavanone isomerase family protein
D1W	1723	Pavir.J15840.1	30275278	Pavir.J15840.1.p|PACid:30275278	-1.9153	0.265117	<.0001	10	Secondary metabolism	AT4G01070.1	UDP-Glycosyltransferase superfamily protein
D1W	2584	Pavir.J24083.1	30202376	Pavir.J24083.1.p|PACid:30202376	-1.8442	0.27851	<.0001	12	Secondary metabolism	AT4G37990.1	elicitor-activated gene 3-2
D1W	5372	Pavir.Aa02398.1	30249465	Pavir.Aa02398.1.p|PACid:30249465	-1.8264	0.281967	<.0001	3	Secondary metabolism	AT5G36160.1	Tyrosine transaminase family protein
D1W	6256	Pavir.J07166.1	30197978	Pavir.J07166.1.p|PACid:30197978	-1.7607	0.295105	<.0001	3	Secondary metabolism	AT5G47770.1	farnesyl diphosphate synthase 1
D1W	605	Pavir.Fa00353.1	30186997	Pavir.Fa00353.1.p|PACid:30186997	-1.7196	0.303633	<.0001	3	Secondary metabolism	AT4G34050.1	S-adenosyl-L-methionine-dependent methyltransferases superfamily protein
D1W	2325	Pavir.J16446.1	30307221	Pavir.J16446.1.p|PACid:30307221	-1.665	0.315344	<.0001	12	Secondary metabolism	AT1G32910.1	HXXXD-type acyl-transferase family protein
D1W	1226	Pavir.Da00296.1	30193912	Pavir.Da00296.1.p|PACid:30193912	-1.509	0.351355	<.0001	10	Secondary metabolism	AT1G51680.1	4-coumarate:CoA ligase 1
D1W	4325	Pavir.Fa01696.1	30187488	Pavir.Fa01696.1.p|PACid:30187488	-1.5011	0.353284	<.0001	8	Secondary metabolism	AT4G39330.1	cinnamyl alcohol dehydrogenase 9
D1W	3769	Pavir.Ia03728.1	30211927	Pavir.Ia03728.1.p|PACid:30211927	-1.47	0.360982	<.0001	11	Secondary metabolism	AT1G17020.1	senescence-related gene 1
D1W	3119	Pavir.J00292.1	30314598	Pavir.J00292.1.p|PACid:30314598	-1.449	0.366275	<.0001	8	Secondary metabolism	AT5G63380.1	AMP-dependent synthetase and ligase family protein
D1W	2830	Pavir.Ib04506.1	30242960	Pavir.Ib04506.1.p|PACid:30242960	-1.3568	0.390447	<.0001	7	Secondary metabolism	AT3G55120.1	Chalcone-flavanone isomerase family protein
D1W	76	Pavir.J25534.1	30256265	Pavir.J25534.1.p|PACid:30256265	-1.31162	0.402868	<.0001	32	Secondary metabolism	AT3G53260.1	phenylalanine ammonia-lyase 2
D1W	6150	Pavir.J01973.1	30286973	Pavir.J01973.1.p|PACid:30286973	-1.3036	0.405114	0.0016	2	Secondary metabolism	AT5G16440.1	isopentenyl diphosphate isomerase 1
D1W	5904	Pavir.Ea03174.1	30227555	Pavir.Ea03174.1.p|PACid:30227555	-1.2948	0.407593	<.0001	6	Secondary metabolism	AT2G26930.1	4-(cytidine 5\'-phospho)-2-C-methyl-D-erithritol kinase
D1W	6216	Pavir.Hb00974.1	30265577	Pavir.Hb00974.1.p|PACid:30265577	-1.2942	0.407762	<.0001	4	Secondary metabolism	AT5G13930.1	Chalcone and stilbene synthase family protein
D1W	1227	Pavir.Aa01372.1	30249789	Pavir.Aa01372.1.p|PACid:30249789	-1.2852	0.410314	<.0001	5	Secondary metabolism	AT5G48930.1	hydroxycinnamoyl-CoA shikimate/quinate hydroxycinnamoyl transferase
D1W	6436	Pavir.Ca01699.1	30206161	Pavir.Ca01699.1.p|PACid:30206161	-1.2795	0.411938	<.0001	5	Secondary metabolism	AT4G35160.1	O-methyltransferase family protein
D1W	5842	Pavir.J15868.1	30258661	Pavir.J15868.1.p|PACid:30258661	-1.2743	0.413426	0.0002	2	Secondary metabolism	AT1G67730.1	beta-ketoacyl reductase 1
D1W	1827	Pavir.Ib00190.1	30241207	Pavir.Ib00190.1.p|PACid:30241207	-1.2719	0.414114	<.0001	2	Secondary metabolism	AT1G20510.1	OPC-8:0 CoA ligase1
D1W	6898	Pavir.J15275.1	30283155	Pavir.J15275.1.p|PACid:30283155	-1.2653	0.416013	<.0001	4	Secondary metabolism	AT5G17050.1	UDP-glucosyl transferase 78D2
D1W	3066	Pavir.Ga01031.1	30302784	Pavir.Ga01031.1.p|PACid:30302784	-1.2499	0.420477	<.0001	3	Secondary metabolism	AT3G50740.1	UDP-glucosyl transferase 72E1
D1W	431	Pavir.Ab02230.1	30233988	Pavir.Ab02230.1.p|PACid:30233988	-1.2469	0.421353	<.0001	26	Secondary metabolism	AT5G60600.1	4-hydroxy-3-methylbut-2-enyl diphosphate synthase
D1W	1061	Pavir.J15085.1	30243365	Pavir.J15085.1.p|PACid:30243365	-1.2257	0.42759	0.0022	2	Secondary metabolism	AT5G60600.3	4-hydroxy-3-methylbut-2-enyl diphosphate synthase
D1W	8164	Pavir.Ga02655.1	30302896	Pavir.Ga02655.1.p|PACid:30302896	-1.2179	0.429908	<.0001	3	Secondary metabolism	AT4G39330.1	cinnamyl alcohol dehydrogenase 9
D1W	7536	Pavir.Ib01545.1	30240433	Pavir.Ib01545.1.p|PACid:30240433	-2.0164	0.247174	<.0001	2	Signaling regulation	AT5G44460.1	calmodulin like 43
D1W	1617	Pavir.Fa00854.1	30186975	Pavir.Fa00854.1.p|PACid:30186975	-1.9683	0.255554	<.0001	7	Signaling regulation	AT3G02520.1	general regulatory factor 7
D1W	3673	Pavir.Gb00126.1	30223660	Pavir.Gb00126.1.p|PACid:30223660	-1.9471	0.259337	<.0001	5	Signaling regulation	AT1G19870.1	IQ-domain 32
D1W	2179	Pavir.J16866.1	30294626	Pavir.J16866.1.p|PACid:30294626	-1.8162	0.283968	<.0001	3	Signaling regulation	AT3G02520.1	general regulatory factor 7
D1W	1926	Pavir.Gb01520.1	30221920	Pavir.Gb01520.1.p|PACid:30221920	-1.7309	0.301264	<.0001	8	Signaling regulation	AT3G02520.1	general regulatory factor 7
D1W	3195	Pavir.Ba03245.1	30289089	Pavir.Ba03245.1.p|PACid:30289089	-1.6603	0.316373	<.0001	11	Signaling regulation	AT1G21240.1	wall associated kinase 3
D1W	820	Pavir.J00886.1	30216329	Pavir.J00886.1.p|PACid:30216329	-1.6317	0.322708	<.0001	2	Signaling regulation	AT3G59920.1	RAB GDP dissociation inhibitor 2
D1W	869	Pavir.J03259.1	30220532	Pavir.J03259.1.p|PACid:30220532	-1.6191	0.325538	<.0001	2	Signaling regulation	AT3G59920.1	RAB GDP dissociation inhibitor 2
D1W	2689	Pavir.Aa01534.1	30249831	Pavir.Aa01534.1.p|PACid:30249831	-1.6138	0.326737	<.0001	2	Signaling regulation	AT3G02520.1	general regulatory factor 7
D1W	5484	Pavir.Ea02867.2	30231219	Pavir.Ea02867.2.p|PACid:30231219	-1.5395	0.344005	<.0001	3	Signaling regulation	AT4G34440.1	Protein kinase superfamily protein
D1W	925	Pavir.J12522.1	30257368	Pavir.J12522.1.p|PACid:30257368	-1.46898	0.361238	<.0001	14	Signaling regulation	AT1G48480.1	receptor-like kinase 1
D1W	1971	Pavir.Ca00563.1	30206513	Pavir.Ca00563.1.p|PACid:30206513	-1.46283	0.362781	<.0001	6	Signaling regulation	AT1G09630.1	RAB GTPase 11C
D1W	1955	Pavir.Ib00568.1	30238056	Pavir.Ib00568.1.p|PACid:30238056	-1.3805	0.384086	<.0001	5	Signaling regulation	AT5G65270.1	RAB GTPase homolog A4A
D1W	2129	Pavir.J05546.1	30216054	Pavir.J05546.1.p|PACid:30216054	-1.373	0.386088	<.0001	2	Signaling regulation	AT4G18800.1	RAB GTPase homolog A1D
D1W	4289	Pavir.J24263.1	30220715	Pavir.J24263.1.p|PACid:30220715	-1.3717	0.386436	<.0001	2	Signaling regulation	AT1G78300.1	general regulatory factor 2
D1W	3544	Pavir.J32563.1	30247305	Pavir.J32563.1.p|PACid:30247305	-1.3367	0.395925	<.0001	2	Signaling regulation	AT3G46830.1	RAB GTPase homolog A2C
D1W	2692	Pavir.Fa00404.1	30188430	Pavir.Fa00404.1.p|PACid:30188430	-1.3345	0.396529	<.0001	10	Signaling regulation	AT2G31680.1	RAB GTPase homolog A5D
D1W	2147	Pavir.J07719.1	30315894	Pavir.J07719.1.p|PACid:30315894	-1.3288	0.398099	<.0001	10	Signaling regulation	AT5G03040.1	IQ-domain 2
D1W	6526	Pavir.Ib04445.1	30239816	Pavir.Ib04445.1.p|PACid:30239816	-1.3182	0.401035	<.0001	3	Signaling regulation	AT5G43310.2	COP1-interacting protein-related
D1W	4591	Pavir.Aa02218.1	30252065	Pavir.Aa02218.1.p|PACid:30252065	-1.3075	0.40402	<.0001	10	Signaling regulation	AT4G21410.1	cysteine-rich RLK (RECEPTOR-like protein kinase) 29
D1W	7245	Pavir.Ba00734.1	30291399	Pavir.Ba00734.1.p|PACid:30291399	-1.2993	0.406323	0.0003	3	Signaling regulation	AT4G23180.1	cysteine-rich RLK (RECEPTOR-like protein kinase) 10
D1W	2638	Pavir.J35909.1	30207288	Pavir.J35909.1.p|PACid:30207288	-1.2908	0.408724	<.0001	4	Signaling regulation	AT2G44100.1	guanosine nucleotide diphosphate dissociation inhibitor 1
D1W	3650	Pavir.J23958.1	30198620	Pavir.J23958.1.p|PACid:30198620	-1.2753	0.413139	0.0001	2	Signaling regulation	AT3G63130.1	RAN GTPase activating protein 1
D1W	4905	Pavir.Ca02505.1	30205263	Pavir.Ca02505.1.p|PACid:30205263	-1.2701	0.414631	<.0001	8	Signaling regulation	AT5G39380.1	Plant calmodulin-binding protein-related
D1W	1471	Pavir.J24175.1	30267366	Pavir.J24175.1.p|PACid:30267366	-1.26567	0.415906	<.0001	22	Signaling regulation	AT5G03040.1	IQ-domain 2
D1W	3386	Pavir.J04391.1	30189651	Pavir.J04391.1.p|PACid:30189651	-1.2476	0.421148	0.002	2	Signaling regulation	AT3G46290.1	hercules receptor kinase 1
D1W	570	Pavir.J20077.2	30315093	Pavir.J20077.2.p|PACid:30315093	-1.2406	0.423197	<.0001	14	Signaling regulation	AT4G20260.1	plasma-membrane associated cation-binding protein 1
D1W	8958	Pavir.Ia00617.1	30210561	Pavir.Ia00617.1.p|PACid:30210561	-1.2367	0.424342	0.0002	2	Signaling regulation	AT5G07110.1	prenylated RAB acceptor 1.B6
D1W	5072	Pavir.Ha01145.1	30318619	Pavir.Ha01145.1.p|PACid:30318619	-1.2253	0.427709	<.0001	7	Signaling regulation	AT4G04570.1	cysteine-rich RLK (RECEPTOR-like protein kinase) 40
D1W	3664	Pavir.Ea01561.1	30227923	Pavir.Ea01561.1.p|PACid:30227923	1.2534	2.38403	<.0001	11	Signaling regulation	AT4G23180.1	cysteine-rich RLK (RECEPTOR-like protein kinase) 10
D1W	1081	Pavir.Eb00019.1	30314169	Pavir.Eb00019.1.p|PACid:30314169	1.8852	3.69404	<.0001	20	Signaling regulation	AT4G20260.5	plasma-membrane associated cation-binding protein 1
D1W	1045	Pavir.Ea00048.1	30230356	Pavir.Ea00048.1.p|PACid:30230356	2.3881	5.23468	<.0001	13	Signaling regulation	AT4G20260.5	plasma-membrane associated cation-binding protein 1
D1W	216	Pavir.Ab02966.1	30233199	Pavir.Ab02966.1.p|PACid:30233199	-1.26722	0.41546	<.0001	27	TCA cycle	AT1G59900.1	pyruvate dehydrogenase complex E1 alpha subunit
D1W	221	Pavir.J08809.1	30307258	Pavir.J08809.1.p|PACid:30307258	-1.2516	0.419982	<.0001	13	TCA cycle	AT1G59900.1	pyruvate dehydrogenase complex E1 alpha subunit
D1W	2296	Pavir.Db01776.1	30261030	Pavir.Db01776.1.p|PACid:30261030	1.3645	2.57487	<.0001	2	TCA cycle	AT1G24180.1	Thiamin diphosphate-binding fold (THDP-binding) superfamily protein
D1W	1662	Pavir.Ea02983.1	30228167	Pavir.Ea02983.1.p|PACid:30228167	1.4055	2.6491	<.0001	16	TCA cycle	AT1G79750.1	NADP-malic enzyme 4
D1W	4389	Pavir.J38164.1	30306766	Pavir.J38164.1.p|PACid:30306766	-2.5528	0.170424	<.0001	2	Transport	AT3G55090.1	ABC-2 type transporter family protein
D1W	4085	Pavir.J16984.1	30307708	Pavir.J16984.1.p|PACid:30307708	-1.9867	0.252315	<.0001	10	Transport	AT5G54750.1	Transport protein particle (TRAPP) component
D1W	5244	Pavir.Cb01675.1	30267481	Pavir.Cb01675.1.p|PACid:30267481	-1.7829	0.290599	<.0001	2	Transport	AT3G05290.1	peroxisomal adenine nucleotide carrier 1
D1W	3607	Pavir.Ia03635.1	30211680	Pavir.Ia03635.1.p|PACid:30211680	-1.7727	0.292661	<.0001	4	Transport	AT3G55090.1	ABC-2 type transporter family protein
D1W	7410	Pavir.J07788.1	30273975	Pavir.J07788.1.p|PACid:30273975	-1.6936	0.309155	<.0001	3	Transport	AT5G20650.1	copper transporter 5
D1W	5636	Pavir.J01488.1	30189739	Pavir.J01488.1.p|PACid:30189739	-1.6319	0.322663	<.0001	2	Transport	AT3G05290.1	peroxisomal adenine nucleotide carrier 1
D1W	1324	Pavir.J11885.1	30190130	Pavir.J11885.1.p|PACid:30190130	-1.62448	0.324327	<.0001	7	Transport	AT2G37170.1	plasma membrane intrinsic protein 2
D1W	6692	Pavir.J05451.1	30308579	Pavir.J05451.1.p|PACid:30308579	-1.5451	0.342672	<.0001	2	Transport	AT2G02040.1	peptide transporter 2
D1W	9323	Pavir.Gb00638.1	30221640	Pavir.Gb00638.1.p|PACid:30221640	-1.5287	0.34659	0.0054	2	Transport	AT2G28315.1	Nucleotide/sugar transporter family protein
D1W	2156	Pavir.Ba02478.1	30289440	Pavir.Ba02478.1.p|PACid:30289440	-1.4822	0.357943	0.0008	2	Transport	AT2G37170.1	plasma membrane intrinsic protein 2
D1W	4179	Pavir.Ib04281.1	30241879	Pavir.Ib04281.1.p|PACid:30241879	-1.4591	0.36372	<.0001	7	Transport	AT5G62680.1	Major facilitator superfamily protein
D1W	7783	Pavir.Ga00419.1	30304132	Pavir.Ga00419.1.p|PACid:30304132	-1.421	0.373453	<.0001	3	Transport	AT3G28860.1	ATP binding cassette subfamily B19
D1W	8128	Pavir.J04954.1	30308395	Pavir.J04954.1.p|PACid:30308395	-1.4131	0.375504	<.0001	2	Transport	AT1G01790.1	K+ efflux antiporter 1
D1W	787	Pavir.J31243.1	30307626	Pavir.J31243.1.p|PACid:30307626	-1.40452	0.377744	<.0001	22	Transport	AT1G15520.1	pleiotropic drug resistance 12
D1W	1244	Pavir.Ab02356.1	30236442	Pavir.Ab02356.1.p|PACid:30236442	-1.3359	0.396145	<.0001	6	Transport	AT2G37170.1	plasma membrane intrinsic protein 2
D1W	8601	Pavir.Fb01142.1	30279774	Pavir.Fb01142.1.p|PACid:30279774	-1.298	0.40669	0.0002	2	Transport	AT3G47730.1	ATP-binding cassette A2
D1W	3202	Pavir.Fa01925.1	30186739	Pavir.Fa01925.1.p|PACid:30186739	-1.2491	0.420711	<.0001	10	Transport	AT1G12110.1	nitrate transporter 1.1
D1W	1155	Pavir.Da02025.1	30192244	Pavir.Da02025.1.p|PACid:30192244	-1.2468	0.421382	0.0002	2	Transport	AT1G15690.1	Inorganic H pyrophosphatase family protein
D1W	5819	Pavir.Ca02176.1	30203662	Pavir.Ca02176.1.p|PACid:30203662	-1.2176	0.429997	0.0018	2	Transport	AT3G18830.1	polyol/monosaccharide transporter 5
D1W	589	Pavir.Bb00689.1	30298226	Pavir.Bb00689.1.p|PACid:30298226	1.435	2.70382	<.0001	3	Transport	AT3G01390.1	vacuolar membrane ATPase 10
D1W	587	Pavir.J08319.1	30216763	Pavir.J08319.1.p|PACid:30216763	1.5773	2.98411	0.0006	2	Transport	AT3G01390.1	vacuolar membrane ATPase 10
D1W	6639	Pavir.Ab01809.1	30232311	Pavir.Ab01809.1.p|PACid:30232311	1.7236	3.30259	<.0001	5	Transport	AT5G04750.1	F1F0-ATPase inhibitor protein, putative
D1W	6669	Pavir.J21027.1	30247869	Pavir.J21027.1.p|PACid:30247869	1.8073	3.49987	<.0001	3	Unclassified	AT1G02700.1	N
D1W	7708	Pavir.Bb00969.1	30297890	Pavir.Bb00969.1.p|PACid:30297890	-1.2565	0.418558	0.0029	2	Unclassified	AT1G05210.1	Transmembrane protein 97, predicted
D1W	3934	Pavir.J00941.1	30207756	Pavir.J00941.1.p|PACid:30207756	-1.2966	0.407084	<.0001	9	Unclassified	AT1G06890.1	nodulin MtN21 /EamA-like transporter family protein
D1W	4201	Pavir.Ib04038.1	30239477	Pavir.Ib04038.1.p|PACid:30239477	-1.4084	0.376729	<.0001	8	Unclassified	AT1G13480.1	Protein of unknown function (DUF1262)
D1W	2521	Pavir.Eb00285.1	30313914	Pavir.Eb00285.1.p|PACid:30313914	-1.3351	0.396365	<.0001	10	Unclassified	AT1G17620.1	Late embryogenesis abundant (LEA) hydroxyproline-rich glycoprotein family
D1W	8515	Pavir.Ba00387.1	30293285	Pavir.Ba00387.1.p|PACid:30293285	-1.2802	0.411738	<.0001	2	Unclassified	AT1G22270.1	Trm112p-like protein
D1W	8451	Pavir.J40359.1	30218428	Pavir.J40359.1.p|PACid:30218428	-1.3683	0.387347	0.0002	2	Unclassified	AT1G32220.1	NAD(P)-binding Rossmann-fold superfamily protein
D1W	7426	Pavir.Aa02580.1	30251601	Pavir.Aa02580.1.p|PACid:30251601	-1.27	0.41466	0.0001	3	Unclassified	AT1G51270.2	structural molecules;transmembrane receptors;structural molecules
D1W	7736	Pavir.Bb01216.1	30296625	Pavir.Bb01216.1.p|PACid:30296625	-1.381	0.383953	<.0001	3	Unclassified	AT1G52910.1	Protein of unknown function (DUF1218)
D1W	1816	Pavir.Ga00514.2	30305072	Pavir.Ga00514.2.p|PACid:30305072	-2.1053	0.232403	<.0001	7	Unclassified	AT1G63220.1	Calcium-dependent lipid-binding (CaLB domain) family protein
D1W	1839	Pavir.Ab03111.1	30232423	Pavir.Ab03111.1.p|PACid:30232423	-1.4443	0.36747	<.0001	16	Unclassified	AT1G64980.1	Nucleotide-diphospho-sugar transferases superfamily protein
D1W	1779	Pavir.J00832.1	30257537	Pavir.J00832.1.p|PACid:30257537	-1.4386	0.368925	<.0001	6	Unclassified	AT1G65010.1	Plant protein of unknown function (DUF827)
D1W	6672	Pavir.Ea02474.1	30226284	Pavir.Ea02474.1.p|PACid:30226284	-1.3975	0.379586	<.0001	3	Unclassified	AT1G66680.1	S-adenosyl-L-methionine-dependent methyltransferases superfamily protein
D1W	4930	Pavir.Ga01067.1	30303039	Pavir.Ga01067.1.p|PACid:30303039	-1.6214	0.32502	<.0001	11	Unclassified	AT1G68260.1	Thioesterase superfamily protein
D1W	3400	Pavir.Eb02898.1	30310378	Pavir.Eb02898.1.p|PACid:30310378	-1.2707	0.414459	<.0001	5	Unclassified	AT2G01600.1	ENTH/ANTH/VHS superfamily protein
D1W	5598	Pavir.Ib01468.1	30238693	Pavir.Ib01468.1.p|PACid:30238693	-1.5153	0.349824	<.0001	5	Unclassified	AT2G16760.1	Calcium-dependent phosphotriesterase superfamily protein
D1W	7390	Pavir.Ea02217.1	30226278	Pavir.Ea02217.1.p|PACid:30226278	-1.3383	0.395486	<.0001	4	Unclassified	AT2G18360.1	alpha/beta-Hydrolases superfamily protein
D1W	4881	Pavir.Fb01083.1	30279622	Pavir.Fb01083.1.p|PACid:30279622	-1.3363	0.396035	<.0001	7	Unclassified	AT2G18990.1	thioredoxin domain-containing protein 9 homolog
D1W	492	Pavir.Db01759.1	30260041	Pavir.Db01759.1.p|PACid:30260041	-1.4578	0.364048	<.0001	7	Unclassified	AT2G22125.1	binding
D1W	6941	Pavir.Bb02505.1	30297068	Pavir.Bb02505.1.p|PACid:30297068	-1.27771	0.41245	<.0001	4	Unclassified	AT2G22400.1	S-adenosyl-L-methionine-dependent methyltransferases superfamily protein
D1W	3155	Pavir.Ba03040.1	30290381	Pavir.Ba03040.1.p|PACid:30290381	-1.4999	0.353578	<.0001	6	Unclassified	AT2G25737.1	Sulfite exporter TauE/SafE family protein
D1W	7825	Pavir.J09180.1	30285968	Pavir.J09180.1.p|PACid:30285968	-1.5193	0.348855	0.0001	2	Unclassified	AT2G35460.1	Late embryogenesis abundant (LEA) hydroxyproline-rich glycoprotein family
D1W	9432	Pavir.Ha00442.1	30317300	Pavir.Ha00442.1.p|PACid:30317300	-1.2248	0.427857	<.0001	2	Unclassified	AT2G35880.1	TPX2 (targeting protein for Xklp2) protein family
D1W	9124	Pavir.Ea03402.1	30229889	Pavir.Ea03402.1.p|PACid:30229889	-1.2307	0.426111	<.0001	3	Unclassified	AT2G37970.1	SOUL heme-binding family protein
D1W	5613	Pavir.J07335.1	30274145	Pavir.J07335.1.p|PACid:30274145	-1.2535	0.419429	<.0001	4	Unclassified	AT2G38320.1	TRICHOME BIREFRINGENCE-LIKE 34
D1W	7907	Pavir.Ba01638.1	30292403	Pavir.Ba01638.1.p|PACid:30292403	-1.8912	0.269583	0.0001	2	Unclassified	AT2G39050.1	hydroxyproline-rich glycoprotein family protein
D1W	3567	Pavir.J15872.1	30200417	Pavir.J15872.1.p|PACid:30200417	-1.26	0.417544	<.0001	14	Unclassified	AT2G40320.1	TRICHOME BIREFRINGENCE-LIKE 33
D1W	6993	Pavir.J11288.1	30195376	Pavir.J11288.1.p|PACid:30195376	-1.3718	0.386409	<.0001	3	Unclassified	AT2G41640.1	Glycosyltransferase family 61 protein
D1W	347	Pavir.Ga01969.1	30303763	Pavir.Ga01969.1.p|PACid:30303763	-1.7695	0.29331	<.0001	11	Unclassified	AT2G43180.2	Phosphoenolpyruvate carboxylase family protein
D1W	198	Pavir.Gb01988.1	30223710	Pavir.Gb01988.1.p|PACid:30223710	-1.34459	0.393766	<.0001	46	Unclassified	AT2G43180.4	Phosphoenolpyruvate carboxylase family protein
D1W	4565	Pavir.Ab00249.1	30232392	Pavir.Ab00249.1.p|PACid:30232392	-1.2269	0.427234	<.0001	10	Unclassified	AT2G46760.1	D-arabinono-1,4-lactone oxidase family protein
D1W	4938	Pavir.J28355.1	30287092	Pavir.J28355.1.p|PACid:30287092	-1.6285	0.323424	<.0001	4	Unclassified	AT3G05540.1	Methionine sulfoxide reductase (MSS4-like) family protein
D1W	4193	Pavir.Ha00222.1	30318340	Pavir.Ha00222.1.p|PACid:30318340	-1.3191	0.400785	<.0001	5	Unclassified	AT3G05540.1	Methionine sulfoxide reductase (MSS4-like) family protein
D1W	7755	Pavir.J06780.1	30220067	Pavir.J06780.1.p|PACid:30220067	-2.4749	0.179879	0.0001	2	Unclassified	AT3G07570.1	Cytochrome b561/ferric reductase transmembrane with DOMON related domain
D1W	4072	Pavir.J13351.1	30283779	Pavir.J13351.1.p|PACid:30283779	-1.25	0.420448	<.0001	3	Unclassified	AT3G08890.1	Protein of unknown function, DUF538
D1W	4047	Pavir.Da01011.1	30192586	Pavir.Da01011.1.p|PACid:30192586	-1.2248	0.427857	<.0001	4	Unclassified	AT3G12685.1	Acid phosphatase/vanadium-dependent haloperoxidase-related protein
D1W	4305	Pavir.Ia03414.1	30212713	Pavir.Ia03414.1.p|PACid:30212713	-1.4201	0.373686	<.0001	4	Unclassified	AT3G16760.1	Tetratricopeptide repeat (TPR)-like superfamily protein
D1W	669	Pavir.Aa01745.1	30252958	Pavir.Aa01745.1.p|PACid:30252958	-1.39	0.381565	<.0001	17	Unclassified	AT3G18170.1	Glycosyltransferase family 61 protein
D1W	2550	Pavir.J36943.1	30288161	Pavir.J36943.1.p|PACid:30288161	-1.29367	0.407912	<.0001	22	Unclassified	AT3G18170.1	Glycosyltransferase family 61 protein
D1W	2050	Pavir.J31027.1	30199729	Pavir.J31027.1.p|PACid:30199729	-1.2586	0.417949	0.0001	4	Unclassified	AT3G18170.1	Glycosyltransferase family 61 protein
D1W	642	Pavir.Ab01849.1	30235204	Pavir.Ab01849.1.p|PACid:30235204	-1.22987	0.426356	<.0001	22	Unclassified	AT3G18170.1	Glycosyltransferase family 61 protein
D1W	3040	Pavir.Ea00720.1	30230641	Pavir.Ea00720.1.p|PACid:30230641	-1.4966	0.354388	<.0001	6	Unclassified	AT3G18180.1	Glycosyltransferase family 61 protein
D1W	4140	Pavir.Ga00481.1	30306055	Pavir.Ga00481.1.p|PACid:30306055	-1.2753	0.413139	0.0017	2	Unclassified	AT3G23840.1	HXXXD-type acyl-transferase family protein
D1W	3672	Pavir.J03564.1	30287194	Pavir.J03564.1.p|PACid:30287194	-1.2376	0.424078	0.0007	2	Unclassified	AT3G23980.1	BLISTER
D1W	6677	Pavir.Da01178.1	30193142	Pavir.Da01178.1.p|PACid:30193142	-1.3088	0.403656	<.0001	4	Unclassified	AT3G28150.1	TRICHOME BIREFRINGENCE-LIKE 22
D1W	3390	Pavir.Fa02398.1	30188272	Pavir.Fa02398.1.p|PACid:30188272	-1.2702	0.414602	<.0001	5	Unclassified	AT3G44330.1	N
D1W	5088	Pavir.Aa01966.1	30252956	Pavir.Aa01966.1.p|PACid:30252956	-1.4696	0.361082	<.0001	3	Unclassified	AT3G48410.1	alpha/beta-Hydrolases superfamily protein
D1W	1834	Pavir.Ia03602.1	30211636	Pavir.Ia03602.1.p|PACid:30211636	-1.7287	0.301724	0.0013	2	Unclassified	AT3G55990.1	Plant protein of unknown function (DUF828)
D1W	6630	Pavir.Cb01685.1	30269522	Pavir.Cb01685.1.p|PACid:30269522	-1.6741	0.313362	<.0001	4	Unclassified	AT3G57420.1	Protein of unknown function (DUF288)
D1W	1690	Pavir.J38488.1	30189540	Pavir.J38488.1.p|PACid:30189540	-1.2951	0.407508	<.0001	6	Unclassified	AT3G61200.1	Thioesterase superfamily protein
D1W	4208	Pavir.J00672.1	30244264	Pavir.J00672.1.p|PACid:30244264	-1.5348	0.345127	<.0001	12	Unclassified	AT3G62160.1	HXXXD-type acyl-transferase family protein
D1W	2256	Pavir.J04765.1	30276188	Pavir.J04765.1.p|PACid:30276188	-1.5154	0.349799	<.0001	20	Unclassified	AT3G62160.1	HXXXD-type acyl-transferase family protein
D1W	4834	Pavir.Ca02673.1	30206583	Pavir.Ca02673.1.p|PACid:30206583	-1.3577	0.390204	<.0001	8	Unclassified	AT3G62160.1	HXXXD-type acyl-transferase family protein
D1W	2787	Pavir.J25785.1	30197088	Pavir.J25785.1.p|PACid:30197088	-1.2653	0.416013	0.0003	3	Unclassified	AT3G62160.1	HXXXD-type acyl-transferase family protein
D1W	3738	Pavir.Fb01457.1	30279046	Pavir.Fb01457.1.p|PACid:30279046	-1.2488	0.420798	0.0002	3	Unclassified	AT4G02450.1	HSP20-like chaperones superfamily protein
D1W	8988	Pavir.Bb02952.1	30300122	Pavir.Bb02952.1.p|PACid:30300122	-1.3428	0.394255	0.0002	2	Unclassified	AT4G21210.1	PPDK regulatory protein
D1W	2906	Pavir.J08990.1	30247406	Pavir.J08990.1.p|PACid:30247406	-2.1644	0.223075	<.0001	10	Unclassified	AT4G24130.1	Protein of unknown function, DUF538
D1W	3814	Pavir.Ba00777.1	30290772	Pavir.Ba00777.1.p|PACid:30290772	-1.45294	0.365276	<.0001	9	Unclassified	AT4G27060.1	ARM repeat superfamily protein
D1W	2591	Pavir.J00584.1	30255754	Pavir.J00584.1.p|PACid:30255754	-1.6263	0.323918	<.0001	4	Unclassified	AT4G29250.1	HXXXD-type acyl-transferase family protein
D1W	5278	Pavir.J21702.1	30200504	Pavir.J21702.1.p|PACid:30200504	-1.736	0.300201	<.0001	3	Unclassified	AT4G37210.1	Tetratricopeptide repeat (TPR)-like superfamily protein
D1W	4531	Pavir.Ib01980.1	30241839	Pavir.Ib01980.1.p|PACid:30241839	-1.2333	0.425343	<.0001	6	Unclassified	AT4G37470.1	alpha/beta-Hydrolases superfamily protein
D1W	2110	Pavir.J36071.1	30271044	Pavir.J36071.1.p|PACid:30271044	-1.3844	0.383049	<.0001	3	Unclassified	AT5G08500.1	Transmembrane CLPTM1 family protein
D1W	8724	Pavir.Eb00112.1	30310321	Pavir.Eb00112.1.p|PACid:30310321	-1.2232	0.428332	<.0001	2	Unclassified	AT5G11640.1	Thioredoxin superfamily protein
D1W	3321	Pavir.J29111.1	30244668	Pavir.J29111.1.p|PACid:30244668	-1.8031	0.286558	<.0001	5	Unclassified	AT5G16730.1	Plant protein of unknown function (DUF827)
D1W	2868	Pavir.J08375.1	30267352	Pavir.J08375.1.p|PACid:30267352	-1.2806	0.411624	0.0007	2	Unclassified	AT5G21950.1	alpha/beta-Hydrolases superfamily protein
D1W	4887	Pavir.J14933.1	30195650	Pavir.J14933.1.p|PACid:30195650	-1.3184	0.400979	<.0001	3	Unclassified	AT5G23490.1	N
D1W	7281	Pavir.Fa00464.1	30186855	Pavir.Fa00464.1.p|PACid:30186855	-1.6188	0.325606	<.0001	6	Unclassified	AT5G25070.1	N
D1W	1729	Pavir.Ha00643.1	30317063	Pavir.Ha00643.1.p|PACid:30317063	-1.8572	0.276011	<.0001	3	Unclassified	AT5G41040.1	HXXXD-type acyl-transferase family protein
D1W	1518	Pavir.Hb00966.1	30264185	Pavir.Hb00966.1.p|PACid:30264185	-1.7369	0.300014	<.0001	8	Unclassified	AT5G41040.1	HXXXD-type acyl-transferase family protein
D1W	4903	Pavir.J07718.1	30257326	Pavir.J07718.1.p|PACid:30257326	-1.7663	0.293962	<.0001	2	Unclassified	AT5G41950.1	Tetratricopeptide repeat (TPR)-like superfamily protein
D1W	4568	Pavir.Ib03761.1	30237374	Pavir.Ib03761.1.p|PACid:30237374	-1.6506	0.318508	<.0001	3	Unclassified	AT5G41950.1	Tetratricopeptide repeat (TPR)-like superfamily protein
D1W	10028	Pavir.Gb01667.1	30224478	Pavir.Gb01667.1.p|PACid:30224478	-1.3125	0.402623	0.0011	2	Unclassified	AT5G42860.1	N
D1W	8223	Pavir.Ab01293.1	30236303	Pavir.Ab01293.1.p|PACid:30236303	-1.2366	0.424372	0.0001	2	Unclassified	AT5G61910.4	DCD (Development and Cell Death) domain protein
D1W	5174	Pavir.Db01595.1	30261404	Pavir.Db01595.1.p|PACid:30261404	-1.6649	0.315366	<.0001	3	Unclassified	AT5G62550.1	N
D1W	5746	Pavir.Da00654.1	30193059	Pavir.Da00654.1.p|PACid:30193059	-1.54	0.343885	<.0001	4	Unclassified	AT5G62550.1	N
D1W	1528	Pavir.Ca01801.1	30205996	Pavir.Ca01801.1.p|PACid:30205996	1.28561	2.43785	<.0001	34	Unclassified	AT1G29850.1	double-stranded DNA-binding family protein
D1W	3193	Pavir.Fa01556.1	30187567	Pavir.Fa01556.1.p|PACid:30187567	1.6178	3.06907	<.0001	14	Unclassified	AT1G32300.1	D-arabinono-1,4-lactone oxidase family protein
D1W	3747	Pavir.J38252.1	30191144	Pavir.J38252.1.p|PACid:30191144	2.0848	4.24216	<.0001	6	Unclassified	AT1G60420.1	DC1 domain-containing protein
D1W	5989	Pavir.J01632.1	30273203	Pavir.J01632.1.p|PACid:30273203	1.29688	2.45697	<.0001	7	Unclassified	AT1G71950.1	Proteinase inhibitor, propeptide
D1W	8701	Pavir.J33862.1	30247090	Pavir.J33862.1.p|PACid:30247090	2.6822	6.41834	<.0001	2	Unclassified	AT2G39090.1	tetratricopeptide repeat (TPR)-containing protein
D1W	7217	Pavir.Cb01443.1	30269304	Pavir.Cb01443.1.p|PACid:30269304	1.4525	2.73682	<.0001	2	Unclassified	AT2G41200.1	N
D1W	2347	Pavir.Fa01601.1	30186390	Pavir.Fa01601.1.p|PACid:30186390	1.6898	3.22612	<.0001	15	Unclassified	AT2G46760.1	D-arabinono-1,4-lactone oxidase family protein
D1W	6331	Pavir.J02005.1	30255874	Pavir.J02005.1.p|PACid:30255874	1.9325	3.81716	<.0001	2	Unclassified	AT3G05975.1	Late embryogenesis abundant (LEA) hydroxyproline-rich glycoprotein family
D1W	648	Pavir.Ib03633.1	30239106	Pavir.Ib03633.1.p|PACid:30239106	2.0834	4.23805	<.0001	20	Unclassified	AT3G46750.1	N
D1W	6810	Pavir.Gb01438.1	30222902	Pavir.Gb01438.1.p|PACid:30222902	1.3553	2.5585	0.0004	2	Unclassified	AT3G59640.1	glycine-rich protein
D1W	7419	Pavir.Ib03696.1	30241723	Pavir.Ib03696.1.p|PACid:30241723	1.39896	2.63711	<.0001	2	Unclassified	AT4G31830.1	N
D1W	710	Pavir.Ib00428.1	30242435	Pavir.Ib00428.1.p|PACid:30242435	3.1265	8.73314	<.0001	27	Unclassified	AT4G36600.1	Late embryogenesis abundant (LEA) protein
D1W	2450	Pavir.J28600.1	30202435	Pavir.J28600.1.p|PACid:30202435	3.3002	9.85052	<.0001	6	Unclassified	AT4G36600.1	Late embryogenesis abundant (LEA) protein
D1W	3033	Pavir.Ga01474.1	30304748	Pavir.Ga01474.1.p|PACid:30304748	1.2791	2.42688	<.0001	5	Unclassified	AT4G39730.1	Lipase/lipooxygenase, PLAT/LH2 family protein
D1W	6201	Pavir.J01936.1	30195714	Pavir.J01936.1.p|PACid:30195714	1.8129	3.51348	<.0001	3	Unclassified	AT4G39730.1	Lipase/lipooxygenase, PLAT/LH2 family protein
D1W	968	Pavir.J02312.1	30294775	Pavir.J02312.1.p|PACid:30294775	2.12921	4.37478	<.0001	43	Unclassified	AT5G01300.1	PEBP (phosphatidylethanolamine-binding protein) family protein
D1W	3328	Pavir.Hb00971.1	30264344	Pavir.Hb00971.1.p|PACid:30264344	2.3264	5.01552	<.0001	13	Unclassified	AT5G07330.1	N
D1W	7460	Pavir.Aa02737.1	30249647	Pavir.Aa02737.1.p|PACid:30249647	1.7849	3.44595	<.0001	4	Unclassified	AT5G44310.2	Late embryogenesis abundant protein (LEA) family protein
D1W	3075	Pavir.Ga00596.1	30302580	Pavir.Ga00596.1.p|PACid:30302580	3.2462	9.48863	<.0001	7	Unclassified	AT5G44310.2	Late embryogenesis abundant protein (LEA) family protein
D1W	7645	Pavir.Gb00543.1	30223554	Pavir.Gb00543.1.p|PACid:30223554	3.5172	11.4494	<.0001	2	Unclassified	AT5G44310.2	Late embryogenesis abundant protein (LEA) family protein
D1W	8581	Pavir.Ab01039.1	30236445	Pavir.Ab01039.1.p|PACid:30236445	1.4661	2.76274	<.0001	2	Unclassified	AT5G53160.2	regulatory components of ABA receptor 3
D1W	8416	Pavir.J00839.1	30281656	Pavir.J00839.1.p|PACid:30281656	1.7126	3.27751	0.0006	2	Unclassified	AT5G63905.1	N

## Sheet: RT2_D3W_DEPs
Treatment	pro_hit_num	pro_acc	pro_ID	pro_acc_ID	log2_fold	fold_change	p_value	num_pep	Functional group at	at_acc	at_annota	at_acc	Functional group	RT2_D3W_up	RT2_D3W_Dn
D3W	4034	Pavir.Bb00468.1	30298354	Pavir.Bb00468.1.p|PACid:30298354	1.0389	2.05466	<.0001	11	Abiotic / biotic stress / Development	AT2G18250.1	4-phosphopantetheine adenylyltransferase	AT2G18250.1	Abiotic / biotic stress / Development	46	2
D3W	3309	Pavir.J08876.1	30275693	Pavir.J08876.1.p|PACid:30275693	-1.1305	0.456757	<.0001	13	Abiotic/biotic stress	AT3G12500.1	basic chitinase	AT3G12500.1	Amino acid metabolism	6	1
D3W	561	Pavir.J11329.1	30271593	Pavir.J11329.1.p|PACid:30271593	-1.0201	0.493082	<.0001	8	Abiotic/biotic stress	AT5G56030.2	heat shock protein 81-2	AT5G56030.2	Cell division & Cell cycle	3	0
D3W	4174	Pavir.Cb00512.1	30268195	Pavir.Cb00512.1.p|PACid:30268195	1.00898	2.01249	<.0001	13	Abiotic/biotic stress	AT2G28790.1	Pathogenesis-related thaumatin superfamily protein	AT2G28790.1	Cell organization	3	0
D3W	2274	Pavir.J02395.1	30315736	Pavir.J02395.1.p|PACid:30315736	1.0266	2.03722	0.0046	3	Abiotic/biotic stress	AT1G74310.1	heat shock protein 101	AT1G74310.1	Cell wall synthesis / modification	8	0
D3W	1997	Pavir.Ga02291.1	30304813	Pavir.Ga02291.1.p|PACid:30304813	1.04572	2.0644	<.0001	25	Abiotic/biotic stress	AT5G24090.1	chitinase A	AT5G24090.1	Development	11	0
D3W	42	Pavir.Eb03667.1	30309961	Pavir.Eb03667.1.p|PACid:30309961	1.0908	2.12992	0.0005	3	Abiotic/biotic stress	AT3G12580.1	heat shock protein 70	AT3G12580.1	DNA synthesis	1	0
D3W	1372	Pavir.Ab00778.1	30233092	Pavir.Ab00778.1.p|PACid:30233092	1.1049	2.15084	<.0001	10	Abiotic/biotic stress	AT5G12030.1	heat shock protein 17.6A	AT5G12030.1	Functional enzyme	41	3
D3W	4766	Pavir.J00993.1	30306102	Pavir.J00993.1.p|PACid:30306102	1.1232	2.1783	<.0001	3	Abiotic/biotic stress	AT5G04890.1	HSP20-like chaperones superfamily protein	AT5G04890.1	Glycolysis	2	1
D3W	5500	Pavir.Ca02660.1	30206509	Pavir.Ca02660.1.p|PACid:30206509	1.135	2.19619	0.0026	2	Abiotic/biotic stress	AT2G47710.1	Adenine nucleotide alpha hydrolases-like superfamily protein	AT2G47710.1	Glyoxylate cycle	0	1
D3W	6853	Pavir.Ia04265.1	30210260	Pavir.Ia04265.1.p|PACid:30210260	1.1486	2.21699	<.0001	2	Abiotic/biotic stress	AT5G04890.1	HSP20-like chaperones superfamily protein	AT5G04890.1	Lipids metabolism	8	5
D3W	3735	Pavir.Ia04457.1	30209221	Pavir.Ia04457.1.p|PACid:30209221	1.1592	2.23334	<.0001	3	Abiotic/biotic stress	AT3G12500.1	basic chitinase	AT3G12500.1	Major CHO metabolism	7	0
D3W	3904	Pavir.J28620.1	30314458	Pavir.J28620.1.p|PACid:30314458	1.1619	2.23752	<.0001	10	Abiotic/biotic stress	AT5G24090.1	chitinase A	AT5G24090.1	Metal binding	2	0
D3W	1117	Pavir.J07818.1	30243543	Pavir.J07818.1.p|PACid:30243543	1.2395	2.36117	<.0001	22	Abiotic/biotic stress	AT4G10250.1	HSP20-like chaperones superfamily protein	AT4G10250.1	Minor CHO metabolism	2	0
D3W	2235	Pavir.J19824.1	30189354	Pavir.J19824.1.p|PACid:30189354	1.2733	2.41714	<.0001	4	Abiotic/biotic stress	AT5G59720.1	heat shock protein 18.2	AT5G59720.1	Mitochondrial electron transport / ATP synthesis	8	2
D3W	2830	Pavir.Da01522.1	30193790	Pavir.Da01522.1.p|PACid:30193790	1.2919	2.4485	<.0001	4	Abiotic/biotic stress	AT1G05260.1	Peroxidase superfamily protein	AT1G05260.1	Phyto-hormone metabolism	10	0
D3W	1774	Pavir.Ea00289.1	30226451	Pavir.Ea00289.1.p|PACid:30226451	1.2944	2.45275	0.0016	3	Abiotic/biotic stress	AT5G12020.1	17.6 kDa class II heat shock protein	AT5G12020.1	Protein degradation	10	3
D3W	6491	Pavir.Ib03654.1	30243014	Pavir.Ib03654.1.p|PACid:30243014	1.3127	2.48406	0.0001	2	Abiotic/biotic stress	AT2G15220.1	Plant basic secretory protein (BSP) family protein	AT2G15220.1	Protein modification	1	0
D3W	1926	Pavir.J38942.1	30276533	Pavir.J38942.1.p|PACid:30276533	1.3261	2.50724	<.0001	15	Abiotic/biotic stress	AT2G32120.1	heat-shock protein 70T-2	AT2G32120.1	Protein synthesis	0	2
D3W	4477	Pavir.Ia01975.1	30210367	Pavir.Ia01975.1.p|PACid:30210367	1.3458	2.54171	<.0001	10	Abiotic/biotic stress	AT5G40020.1	Pathogenesis-related thaumatin superfamily protein	AT5G40020.1	Protein targeting & vesicle tansport	4	0
D3W	5101	Pavir.Eb02336.1	30308702	Pavir.Eb02336.1.p|PACid:30308702	1.3882	2.61752	<.0001	8	Abiotic/biotic stress	AT2G21100.1	Disease resistance-responsive (dirigent-like protein) family protein	AT2G21100.1	Redox balance	9	0
D3W	72	Pavir.Ia03665.1	30210947	Pavir.Ia03665.1.p|PACid:30210947	1.4119	2.66087	0.0001	5	Abiotic/biotic stress	AT5G02500.1	heat shock cognate protein 70-1	AT5G02500.1	RNA processing	3	0
D3W	1375	Pavir.J29514.1	30196199	Pavir.J29514.1.p|PACid:30196199	1.4199	2.67567	<.0001	11	Abiotic/biotic stress	AT5G12030.1	heat shock protein 17.6A	AT5G12030.1	S-assimilation	0	1
D3W	5031	Pavir.J37785.1	30247312	Pavir.J37785.1.p|PACid:30247312	1.4364	2.70645	0.0013	3	Abiotic/biotic stress	AT4G33720.1	CAP (Cysteine-rich secretory proteins, Antigen 5, and Pathogenesis-related 1 protein) superfamily protein	AT4G33720.1	Secondary metabolism	4	1
D3W	3112	Pavir.Ia01182.1	30215723	Pavir.Ia01182.1.p|PACid:30215723	1.48565	2.80043	<.0001	18	Abiotic/biotic stress	AT5G04890.1	HSP20-like chaperones superfamily protein	AT5G04890.1	Signaling regulation	8	7
D3W	1781	Pavir.Ca00609.1	30204579	Pavir.Ca00609.1.p|PACid:30204579	1.49572	2.82005	<.0001	21	Abiotic/biotic stress	AT2G38870.1	Serine protease inhibitor, potato inhibitor I-type family protein	AT2G38870.1	TCA cycle	2	0
D3W	1324	Pavir.Ga01718.1	30303744	Pavir.Ga01718.1.p|PACid:30303744	1.5352	2.89829	<.0001	15	Abiotic/biotic stress	AT4G10250.1	HSP20-like chaperones superfamily protein	AT4G10250.1	Transport	4	2
D3W	4639	Pavir.Ib02577.1	30239592	Pavir.Ib02577.1.p|PACid:30239592	1.5674	2.9637	<.0001	10	Abiotic/biotic stress	AT1G66100.1	Plant thionin	AT1G66100.1	Unclassified	45	7
D3W	8140	Pavir.Hb01571.1	30264315	Pavir.Hb01571.1.p|PACid:30264315	1.5891	3.00862	<.0001	5	Abiotic/biotic stress	AT1G66100.1	Plant thionin	AT1G66100.1
D3W	3918	Pavir.J37362.1	30294839	Pavir.J37362.1.p|PACid:30294839	1.6054	3.0428	0.0038	2	Abiotic/biotic stress	AT1G74310.1	heat shock protein 101	AT1G74310.1
D3W	1508	Pavir.Ib01026.1	30238031	Pavir.Ib01026.1.p|PACid:30238031	1.6943	3.2362	<.0001	6	Abiotic/biotic stress	AT4G27670.1	heat shock protein 21	AT4G27670.1
D3W	731	Pavir.J34564.1	30263851	Pavir.J34564.1.p|PACid:30263851	1.7253	3.30649	<.0001	23	Abiotic/biotic stress	AT3G12500.1	basic chitinase	AT3G12500.1
D3W	5268	Pavir.Db00351.1	30262264	Pavir.Db00351.1.p|PACid:30262264	1.7289	3.31475	<.0001	2	Abiotic/biotic stress	AT4G21320.1	Aldolase-type TIM barrel family protein	AT4G21320.1
D3W	2664	Pavir.Ab00731.1	30236320	Pavir.Ab00731.1.p|PACid:30236320	1.7673	3.40416	<.0001	12	Abiotic/biotic stress	AT1G52560.1	HSP20-like chaperones superfamily protein	AT1G52560.1
D3W	4383	Pavir.Ia01894.1	30209168	Pavir.Ia01894.1.p|PACid:30209168	1.8756	3.66954	<.0001	9	Abiotic/biotic stress	AT5G20970.1	HSP20-like chaperones superfamily protein	AT5G20970.1
D3W	1141	Pavir.Ib01136.1	30237887	Pavir.Ib01136.1.p|PACid:30237887	1.9084	3.75393	<.0001	21	Abiotic/biotic stress	AT3G46230.1	heat shock protein 17.4	AT3G46230.1
D3W	4490	Pavir.Eb03806.1	30312699	Pavir.Eb03806.1.p|PACid:30312699	1.9179	3.77873	<.0001	9	Abiotic/biotic stress	AT4G11650.1	osmotin 34	AT4G11650.1
D3W	1396	Pavir.J08073.1	30308630	Pavir.J08073.1.p|PACid:30308630	1.9507	3.86562	<.0001	3	Abiotic/biotic stress	AT4G27670.1	heat shock protein 21	AT4G27670.1
D3W	6681	Pavir.J31186.1	30216617	Pavir.J31186.1.p|PACid:30216617	1.9874	3.96522	0.001	2	Abiotic/biotic stress	AT3G04720.1	pathogenesis-related 4	AT3G04720.1
D3W	2081	Pavir.Ca00608.1	30204384	Pavir.Ca00608.1.p|PACid:30204384	1.9876	3.96577	<.0001	2	Abiotic/biotic stress	AT2G38870.1	Serine protease inhibitor, potato inhibitor I-type family protein	AT2G38870.1
D3W	3343	Pavir.Bb03197.1	30299608	Pavir.Bb03197.1.p|PACid:30299608	2.1044	4.30019	<.0001	9	Abiotic/biotic stress	AT4G11650.1	osmotin 34	AT4G11650.1
D3W	2775	Pavir.J21349.1	30225604	Pavir.J21349.1.p|PACid:30225604	2.1711	4.50367	<.0001	2	Abiotic/biotic stress	AT1G54050.1	HSP20-like chaperones superfamily protein	AT1G54050.1
D3W	6339	Pavir.Cb00662.1	30269981	Pavir.Cb00662.1.p|PACid:30269981	2.2	4.59479	<.0001	2	Abiotic/biotic stress	AT5G66400.1	Dehydrin family protein	AT5G66400.1
D3W	1149	Pavir.Ea00606.1	30226304	Pavir.Ea00606.1.p|PACid:30226304	2.2418	4.72987	<.0001	8	Abiotic/biotic stress	AT5G59720.1	heat shock protein 18.2	AT5G59720.1
D3W	1132	Pavir.J36067.1	30201011	Pavir.J36067.1.p|PACid:30201011	2.3094	4.95677	0.0002	3	Abiotic/biotic stress	AT5G12020.1	17.6 kDa class II heat shock protein	AT5G12020.1
D3W	8399	Pavir.J36772.1	30203019	Pavir.J36772.1.p|PACid:30203019	3.3912	10.4919	<.0001	3	Abiotic/biotic stress	AT3G04720.1	pathogenesis-related 4	AT3G04720.1
D3W	1623	Pavir.J13075.1	30246880	Pavir.J13075.1.p|PACid:30246880	3.838	14.3006	<.0001	5	Abiotic/biotic stress	AT5G66400.1	Dehydrin family protein	AT5G66400.1
D3W	7199	Pavir.Ia04379.1	30211558	Pavir.Ia04379.1.p|PACid:30211558	1.3195	2.4958	0.0452	2	Abiotic/biotic stress / Phyto-hormone metabolism	AT1G19180.1	jasmonate-zim-domain protein 1	AT1G19180.1
D3W	6391	Pavir.Da02439.1	30193736	Pavir.Da02439.1.p|PACid:30193736	1.0218	2.03045	<.0001	5	Amino acid metabolism	AT5G54080.1	homogentisate 1,2-dioxygenase	AT5G54080.1
D3W	155	Pavir.Fa02123.1	30186363	Pavir.Fa02123.1.p|PACid:30186363	1.04174	2.05871	<.0001	17	Amino acid metabolism	AT1G11840.6	glyoxalase I homolog	AT1G11840.6
D3W	1264	Pavir.Fa00915.1	30186533	Pavir.Fa00915.1.p|PACid:30186533	1.0671	2.09522	<.0001	10	Amino acid metabolism	AT5G17330.1	glutamate decarboxylase	AT5G17330.1
D3W	4544	Pavir.Db00371.1	30262621	Pavir.Db00371.1.p|PACid:30262621	1.2792	2.42704	<.0001	3	Amino acid metabolism	AT4G20930.1	6-phosphogluconate dehydrogenase family protein	AT4G20930.1
D3W	167	Pavir.Fb00620.1	30278273	Pavir.Fb00620.1.p|PACid:30278273	1.45044	2.73291	<.0001	10	Amino acid metabolism	AT1G11840.6	glyoxalase I homolog	AT1G11840.6
D3W	4495	Pavir.Ib02204.1	30241074	Pavir.Ib02204.1.p|PACid:30241074	-1.1744	0.443068	<.0001	5	Amino acid metabolism / Lipids metabolism	AT4G31810.1	ATP-dependent caseinolytic (Clp) protease/crotonase family protein	AT4G31810.1
D3W	2943	Pavir.J03218.1	30208624	Pavir.J03218.1.p|PACid:30208624	1.1089	2.15681	0.0028	3	Ammonia metabolism	AT2G15620.1	nitrite reductase 1	AT2G15620.1
D3W	7277	Pavir.Ib02932.1	30241700	Pavir.Ib02932.1.p|PACid:30241700	1.0447	2.06294	0.0007	2	Cell division & Cell cycle	AT2G16600.1	rotamase CYP 3	AT2G16600.1
D3W	3092	Pavir.Fa02193.1	30185674	Pavir.Fa02193.1.p|PACid:30185674	1.08812	2.12597	<.0001	11	Cell division & Cell cycle	AT3G63190.1	ribosome recycling factor, chloroplast precursor	AT3G63190.1
D3W	5253	Pavir.Aa01476.1	30249309	Pavir.Aa01476.1.p|PACid:30249309	1.115	2.16595	<.0001	3	Cell division & Cell cycle	AT5G40770.1	prohibitin 3	AT5G40770.1
D3W	2200	Pavir.J16347.1	30307684	Pavir.J16347.1.p|PACid:30307684	1.4891	2.80714	<.0001	10	Cell organization	AT1G01750.1	actin depolymerizing factor 11	AT1G01750.1
D3W	5356	Pavir.Hb01246.1	30265856	Pavir.Hb01246.1.p|PACid:30265856	1.7295	3.31613	<.0001	2	Cell organization	AT4G22240.1	Plastid-lipid associated protein PAP / fibrillin family protein	AT4G22240.1
D3W	2402	Pavir.J00892.1	30275043	Pavir.J00892.1.p|PACid:30275043	2.1339	4.38902	<.0001	8	Cell organization	AT1G01750.1	actin depolymerizing factor 11	AT1G01750.1
D3W	5454	Pavir.J33491.1	30281327	Pavir.J33491.1.p|PACid:30281327	1.0211	2.02947	<.0001	6	Cell wall synthesis / modification	AT5G03170.1	FASCICLIN-like arabinogalactan-protein 11	AT5G03170.1
D3W	4458	Pavir.Bb01836.1	30300579	Pavir.Bb01836.1.p|PACid:30300579	1.249	2.37677	<.0001	8	Cell wall synthesis / modification	AT2G45110.1	expansin B4	AT2G45110.1
D3W	5238	Pavir.Cb02121.1	30267871	Pavir.Cb02121.1.p|PACid:30267871	1.254	2.38502	<.0001	4	Cell wall synthesis / modification	AT3G10740.1	alpha-L-arabinofuranosidase 1	AT3G10740.1
D3W	5732	Pavir.Ha01909.1	30318209	Pavir.Ha01909.1.p|PACid:30318209	1.2919	2.4485	0.001	2	Cell wall synthesis / modification	AT3G10740.1	alpha-L-arabinofuranosidase 1	AT3G10740.1
D3W	7290	Pavir.Ib04109.1	30237959	Pavir.Ib04109.1.p|PACid:30237959	1.3917	2.62388	0.0115	2	Cell wall synthesis / modification	AT1G58370.1	glycosyl hydrolase family 10 protein / carbohydrate-binding domain-containing protein	AT1G58370.1
D3W	8448	Pavir.Ba00258.1	30291621	Pavir.Ba00258.1.p|PACid:30291621	1.5609	2.95038	<.0001	2	Cell wall synthesis / modification	AT3G10740.1	alpha-L-arabinofuranosidase 1	AT3G10740.1
D3W	3408	Pavir.Ib03630.1	30236769	Pavir.Ib03630.1.p|PACid:30236769	1.7732	3.41811	<.0001	5	Cell wall synthesis / modification	AT1G65680.1	expansin B2	AT1G65680.1
D3W	3673	Pavir.Ib02222.1	30238687	Pavir.Ib02222.1.p|PACid:30238687	1.9063	3.74847	<.0001	4	Cell wall synthesis / modification	AT1G65680.1	expansin B2	AT1G65680.1
D3W	6512	Pavir.J07119.1	30283861	Pavir.J07119.1.p|PACid:30283861	1.1943	2.28834	0.0023	2	Development	AT1G01470.1	Late embryogenesis abundant protein	AT1G01470.1
D3W	4042	Pavir.Ia02723.1	30214198	Pavir.Ia02723.1.p|PACid:30214198	1.2968	2.45683	<.0001	9	Development	AT2G03440.1	nodulin-related protein 1	AT2G03440.1
D3W	6226	Pavir.Bb02409.1	30298298	Pavir.Bb02409.1.p|PACid:30298298	1.3428	2.53643	<.0001	4	Development	AT2G33690.1	Late embryogenesis abundant protein, group 6	AT2G33690.1
D3W	4868	Pavir.Aa00332.1	30252986	Pavir.Aa00332.1.p|PACid:30252986	1.4587	2.74861	<.0001	2	Development	AT3G03270.2	Adenine nucleotide alpha hydrolases-like superfamily protein	AT3G03270.2
D3W	3205	Pavir.J19600.1	30274742	Pavir.J19600.1.p|PACid:30274742	1.6251	3.08464	<.0001	10	Development	AT3G22490.1	Seed maturation protein	AT3G22490.1
D3W	4797	Pavir.Ia03678.1	30215378	Pavir.Ia03678.1.p|PACid:30215378	1.8112	3.50934	<.0001	4	Development	AT3G53040.1	late embryogenesis abundant protein, putative / LEA protein, putative	AT3G53040.1
D3W	4163	Pavir.J24821.1	30277014	Pavir.J24821.1.p|PACid:30277014	2.2112	4.6306	<.0001	6	Development	AT1G52690.1	Late embryogenesis abundant protein (LEA) family protein	AT1G52690.1
D3W	8900	Pavir.J00999.1	30308562	Pavir.J00999.1.p|PACid:30308562	2.3805	5.20717	0.0003	2	Development	AT2G36640.1	embryonic cell protein 63	AT2G36640.1
D3W	284	Pavir.Ca01780.1	30206225	Pavir.Ca01780.1.p|PACid:30206225	2.76844	6.81371	<.0001	29	Development	AT3G15670.1	Late embryogenesis abundant protein (LEA) family protein	AT3G15670.1
D3W	389	Pavir.J00158.1	30282759	Pavir.J00158.1.p|PACid:30282759	2.87746	7.34855	<.0001	59	Development	AT3G15670.1	Late embryogenesis abundant protein (LEA) family protein	AT3G15670.1
D3W	6155	Pavir.Fa01222.1	30186751	Pavir.Fa01222.1.p|PACid:30186751	3.0694	8.39424	<.0001	3	Development	AT5G06760.1	Late Embryogenesis Abundant 4-5	AT5G06760.1
D3W	1709	Pavir.J03092.1	30216516	Pavir.J03092.1.p|PACid:30216516	1.0436	2.06137	<.0001	3	DNA synthesis	AT5G02560.1	histone H2A 12	AT5G02560.1
D3W	8897	Pavir.J24019.1	30257531	Pavir.J24019.1.p|PACid:30257531	-1.2831	0.410912	0.0039	2	Functional enzyme	AT4G33355.1	Bifunctional inhibitor/lipid-transfer protein/seed storage 2S albumin superfamily protein	AT4G33355.1
D3W	2229	Pavir.Bb00105.1	30297002	Pavir.Bb00105.1.p|PACid:30297002	-1.2021	0.434642	<.0001	19	Functional enzyme	AT3G01190.1	Peroxidase superfamily protein	AT3G01190.1
D3W	3648	Pavir.Ia03296.1	30210796	Pavir.Ia03296.1.p|PACid:30210796	-1.0303	0.489608	0.0082	3	Functional enzyme	AT5G42180.1	Peroxidase superfamily protein	AT5G42180.1
D3W	1798	Pavir.J03245.1	30195944	Pavir.J03245.1.p|PACid:30195944	1.0079	2.01098	0.0028	2	Functional enzyme	AT1G13750.1	Purple acid phosphatases superfamily protein	AT1G13750.1
D3W	7456	Pavir.J15812.1	30248492	Pavir.J15812.1.p|PACid:30248492	1.0093	2.01293	0.0067	2	Functional enzyme	AT5G42720.1	Glycosyl hydrolase family 17 protein	AT5G42720.1
D3W	7513	Pavir.J22740.1	30294080	Pavir.J22740.1.p|PACid:30294080	1.0228	2.03186	0.0003	3	Functional enzyme	AT4G33860.1	Glycosyl hydrolase family 10 protein	AT4G33860.1
D3W	3207	Pavir.J26569.1	30248154	Pavir.J26569.1.p|PACid:30248154	1.0376	2.05281	0.0002	3	Functional enzyme	AT3G60130.1	beta glucosidase 16	AT3G60130.1
D3W	2638	Pavir.Da00805.1	30193261	Pavir.Da00805.1.p|PACid:30193261	1.0709	2.10074	<.0001	5	Functional enzyme	AT4G20860.1	FAD-binding Berberine family protein	AT4G20860.1
D3W	703	Pavir.Ea01261.1	30231507	Pavir.Ea01261.1.p|PACid:30231507	1.07944	2.11322	<.0001	21	Functional enzyme	AT1G71695.1	Peroxidase superfamily protein	AT1G71695.1
D3W	1857	Pavir.Ab01247.1	30236234	Pavir.Ab01247.1.p|PACid:30236234	1.0806	2.11492	<.0001	8	Functional enzyme	AT2G15480.2	UDP-glucosyl transferase 73B5	AT2G15480.2
D3W	2391	Pavir.Ib02422.1	30240684	Pavir.Ib02422.1.p|PACid:30240684	1.0822	2.11726	<.0001	11	Functional enzyme	AT3G03190.1	glutathione S-transferase F11	AT3G03190.1
D3W	2933	Pavir.Eb03999.1	30313144	Pavir.Eb03999.1.p|PACid:30313144	1.0885	2.12653	<.0001	11	Functional enzyme	AT1G71695.1	Peroxidase superfamily protein	AT1G71695.1
D3W	7788	Pavir.Ga00285.1	30305177	Pavir.Ga00285.1.p|PACid:30305177	1.1307	2.18965	0.0001	2	Functional enzyme	AT5G13690.1	alpha-N-acetylglucosaminidase family / NAGLU family	AT5G13690.1
D3W	4112	Pavir.Da00810.1	30192346	Pavir.Da00810.1.p|PACid:30192346	1.138	2.20076	<.0001	3	Functional enzyme	AT4G20860.1	FAD-binding Berberine family protein	AT4G20860.1
D3W	1745	Pavir.Ea01477.1	30231124	Pavir.Ea01477.1.p|PACid:30231124	1.1488	2.21729	<.0001	15	Functional enzyme	AT3G21770.1	Peroxidase superfamily protein	AT3G21770.1
D3W	1923	Pavir.J24327.1	30256877	Pavir.J24327.1.p|PACid:30256877	1.1548	2.22653	<.0001	11	Functional enzyme	AT1G10370.1	Glutathione S-transferase family protein	AT1G10370.1
D3W	2571	Pavir.Bb03524.1	30297224	Pavir.Bb03524.1.p|PACid:30297224	1.1746	2.2573	<.0001	9	Functional enzyme	AT4G03140.1	NAD(P)-binding Rossmann-fold superfamily protein	AT4G03140.1
D3W	1575	Pavir.Ca00811.1	30204135	Pavir.Ca00811.1.p|PACid:30204135	1.1943	2.28834	<.0001	15	Functional enzyme	AT4G25150.1	HAD superfamily, subfamily IIIB acid phosphatase	AT4G25150.1
D3W	4035	Pavir.Aa02058.1	30253206	Pavir.Aa02058.1.p|PACid:30253206	1.2227	2.33383	<.0001	5	Functional enzyme	AT2G45550.1	cytochrome P450, family 76, subfamily C, polypeptide 4	AT2G45550.1
D3W	5739	Pavir.Bb00998.1	30301535	Pavir.Bb00998.1.p|PACid:30301535	1.23	2.34567	<.0001	5	Functional enzyme	AT5G48485.1	Bifunctional inhibitor/lipid-transfer protein/seed storage 2S albumin superfamily protein	AT5G48485.1
D3W	5519	Pavir.Ib01771.1	30241978	Pavir.Ib01771.1.p|PACid:30241978	1.2407	2.36313	<.0001	5	Functional enzyme	AT2G46950.1	cytochrome P450, family 709, subfamily B, polypeptide 2	AT2G46950.1
D3W	4754	Pavir.Ea02497.1	30228113	Pavir.Ea02497.1.p|PACid:30228113	1.2528	2.38303	0.0017	3	Functional enzyme	AT1G10360.1	glutathione S-transferase TAU 18	AT1G10360.1
D3W	7203	Pavir.Ib02543.1	30241255	Pavir.Ib02543.1.p|PACid:30241255	1.2673	2.40711	0.0003	2	Functional enzyme	AT1G10370.1	Glutathione S-transferase family protein	AT1G10370.1
D3W	3192	Pavir.Ib00203.1	30238910	Pavir.Ib00203.1.p|PACid:30238910	1.287	2.4402	<.0001	14	Functional enzyme	AT2G47730.1	glutathione S-transferase phi 8	AT2G47730.1
D3W	5059	Pavir.Gb01868.1	30222408	Pavir.Gb01868.1.p|PACid:30222408	1.3171	2.49165	<.0001	4	Functional enzyme	AT5G05960.1	Bifunctional inhibitor/lipid-transfer protein/seed storage 2S albumin superfamily protein	AT5G05960.1
D3W	4510	Pavir.Ab01476.1	30234312	Pavir.Ab01476.1.p|PACid:30234312	1.3296	2.51333	<.0001	5	Functional enzyme	AT2G45550.1	cytochrome P450, family 76, subfamily C, polypeptide 4	AT2G45550.1
D3W	6045	Pavir.Ea03391.1	30231527	Pavir.Ea03391.1.p|PACid:30231527	1.3401	2.53169	<.0001	3	Functional enzyme	AT5G05960.1	Bifunctional inhibitor/lipid-transfer protein/seed storage 2S albumin superfamily protein	AT5G05960.1
D3W	5317	Pavir.Ia03474.1	30210895	Pavir.Ia03474.1.p|PACid:30210895	1.3737	2.59134	0.0011	2	Functional enzyme	AT4G38540.1	FAD/NAD(P)-binding oxidoreductase family protein	AT4G38540.1
D3W	4240	Pavir.Ia00797.1	30210919	Pavir.Ia00797.1.p|PACid:30210919	1.3739	2.5917	<.0001	6	Functional enzyme	AT2G02850.1	plantacyanin	AT2G02850.1
D3W	916	Pavir.Ea01477.2	30231125	Pavir.Ea01477.2.p|PACid:30231125	1.4593	2.74975	<.0001	25	Functional enzyme	AT1G44970.1	Peroxidase superfamily protein	AT1G44970.1
D3W	5083	Pavir.J00683.1	30255035	Pavir.J00683.1.p|PACid:30255035	1.4708	2.77176	<.0001	9	Functional enzyme	AT5G05960.1	Bifunctional inhibitor/lipid-transfer protein/seed storage 2S albumin superfamily protein	AT5G05960.1
D3W	8710	Pavir.Fb00096.1	30280545	Pavir.Fb00096.1.p|PACid:30280545	1.4784	2.7864	<.0001	4	Functional enzyme	AT4G13290.1	cytochrome P450, family 71, subfamily A, polypeptide 19	AT4G13290.1
D3W	5644	Pavir.Eb03528.2	30313716	Pavir.Eb03528.2.p|PACid:30313716	1.4827	2.79471	<.0001	4	Functional enzyme	AT1G02850.2	beta glucosidase 11	AT1G02850.2
D3W	7893	Pavir.Db00677.1	30262371	Pavir.Db00677.1.p|PACid:30262371	1.5256	2.87906	0.0006	2	Functional enzyme	AT3G26210.1	cytochrome P450, family 71, subfamily B, polypeptide 23	AT3G26210.1
D3W	7175	Pavir.Ba03692.1	30293021	Pavir.Ba03692.1.p|PACid:30293021	1.5833	2.99654	<.0001	3	Functional enzyme	AT3G03980.1	NAD(P)-binding Rossmann-fold superfamily protein	AT3G03980.1
D3W	4877	Pavir.Fb00271.1	30281008	Pavir.Fb00271.1.p|PACid:30281008	1.5895	3.00945	0.0002	2	Functional enzyme	AT3G02100.1	UDP-Glycosyltransferase superfamily protein	AT3G02100.1
D3W	4320	Pavir.J22570.1	30308575	Pavir.J22570.1.p|PACid:30308575	1.5997	3.0308	<.0001	6	Functional enzyme	AT1G10360.1	glutathione S-transferase TAU 18	AT1G10360.1
D3W	4663	Pavir.J08895.1	30257540	Pavir.J08895.1.p|PACid:30257540	1.6026	3.0369	<.0001	5	Functional enzyme	AT3G03080.1	Zinc-binding dehydrogenase family protein	AT3G03080.1
D3W	6894	Pavir.Eb03260.1	30309661	Pavir.Eb03260.1.p|PACid:30309661	1.6147	3.06248	<.0001	3	Functional enzyme	AT4G37560.1	Acetamidase/Formamidase family protein	AT4G37560.1
D3W	6485	Pavir.J18194.1	30255395	Pavir.J18194.1.p|PACid:30255395	1.6159	3.06503	<.0001	3	Functional enzyme	AT5G46940.1	Plant invertase/pectin methylesterase inhibitor superfamily protein	AT5G46940.1
D3W	5900	Pavir.Ia03286.1	30212283	Pavir.Ia03286.1.p|PACid:30212283	1.6837	3.21251	<.0001	4	Functional enzyme	AT2G46950.1	cytochrome P450, family 709, subfamily B, polypeptide 2	AT2G46950.1
D3W	8013	Pavir.J20172.1	30266975	Pavir.J20172.1.p|PACid:30266975	1.6907	3.22813	<.0001	3	Functional enzyme	AT3G09270.1	glutathione S-transferase TAU 8	AT3G09270.1
D3W	4455	Pavir.Da00146.1	30192844	Pavir.Da00146.1.p|PACid:30192844	1.8536	3.61401	<.0001	2	Functional enzyme	AT4G30170.1	Peroxidase family protein	AT4G30170.1
D3W	5536	Pavir.Da00087.1	30194507	Pavir.Da00087.1.p|PACid:30194507	2.1165	4.33641	<.0001	5	Functional enzyme	AT3G20570.1	early nodulin-like protein 9	AT3G20570.1
D3W	5704	Pavir.J27884.1	30259066	Pavir.J27884.1.p|PACid:30259066	-1.0015	0.49948	0.0341	2	Glycolysis	AT3G14940.1	phosphoenolpyruvate carboxylase 3	AT3G14940.1
D3W	75	Pavir.J07576.1	30308383	Pavir.J07576.1.p|PACid:30308383	1.03875	2.05445	<.0001	22	Glycolysis	AT1G79550.1	phosphoglycerate kinase	AT1G79550.1
D3W	1205	Pavir.Ib01540.1	30237822	Pavir.Ib01540.1.p|PACid:30237822	2.12616	4.36554	<.0001	29	Glycolysis	AT3G08590.1	Phosphoglycerate mutase, 2,3-bisphosphoglycerate-independent	AT3G08590.1
D3W	840	Pavir.J02207.1	30225449	Pavir.J02207.1.p|PACid:30225449	-1.2474	0.421207	<.0001	7	Glyoxylate cycle	AT4G15530.1	pyruvate orthophosphate dikinase	AT4G15530.1
D3W	5394	Pavir.J01373.1	30219389	Pavir.J01373.1.p|PACid:30219389	-1.6155	0.326352	0.0006	2	Lipids metabolism	AT1G54580.1	acyl carrier protein 2	AT1G54580.1
D3W	3864	Pavir.Cb00901.1	30269979	Pavir.Cb00901.1.p|PACid:30269979	-1.5477	0.342055	<.0001	5	Lipids metabolism	AT4G25050.1	acyl carrier protein 4	AT4G25050.1
D3W	5920	Pavir.Fb02310.1	30278297	Pavir.Fb02310.1.p|PACid:30278297	-1.3527	0.391559	0.0007	2	Lipids metabolism	AT1G54580.1	acyl carrier protein 2	AT1G54580.1
D3W	5777	Pavir.J04109.1	30256957	Pavir.J04109.1.p|PACid:30256957	-1.3321	0.39719	0.0005	2	Lipids metabolism	AT1G54580.1	acyl carrier protein 2	AT1G54580.1
D3W	2885	Pavir.Bb02686.1	30297191	Pavir.Bb02686.1.p|PACid:30297191	-1.0577	0.480397	<.0001	7	Lipids metabolism	AT1G54580.1	acyl carrier protein 2	AT1G54580.1
D3W	2930	Pavir.Db02396.1	30260752	Pavir.Db02396.1.p|PACid:30260752	1.0534	2.07542	<.0001	8	Lipids metabolism	AT1G31812.1	acyl-CoA-binding protein 6	AT1G31812.1
D3W	6687	Pavir.J26179.1	30219774	Pavir.J26179.1.p|PACid:30219774	1.0614	2.08696	0.0003	2	Lipids metabolism	AT3G45070.1	P-loop containing nucleoside triphosphate hydrolases superfamily protein	AT3G45070.1
D3W	2268	Pavir.Fb00434.1	30279270	Pavir.Fb00434.1.p|PACid:30279270	1.1006	2.14444	<.0001	13	Lipids metabolism	AT1G31812.1	acyl-CoA-binding protein 6	AT1G31812.1
D3W	1553	Pavir.Fa02106.2	30188726	Pavir.Fa02106.2.p|PACid:30188726	1.10965	2.15793	<.0001	24	Lipids metabolism	AT1G31812.1	acyl-CoA-binding protein 6	AT1G31812.1
D3W	5810	Pavir.Fb02232.1	30278475	Pavir.Fb02232.1.p|PACid:30278475	1.2026	2.30154	<.0001	7	Lipids metabolism	AT4G33790.1	Jojoba acyl CoA reductase-related male sterility protein	AT4G33790.1
D3W	2931	Pavir.Ab02053.1	30235451	Pavir.Ab02053.1.p|PACid:30235451	1.2285	2.34323	<.0001	11	Lipids metabolism	AT1G47480.1	alpha/beta-Hydrolases superfamily protein	AT1G47480.1
D3W	2757	Pavir.J10442.1	30274580	Pavir.J10442.1.p|PACid:30274580	1.2945	2.45292	<.0001	6	Lipids metabolism	AT5G54500.1	flavodoxin-like quinone reductase 1	AT5G54500.1
D3W	6489	Pavir.Aa01512.1	30252328	Pavir.Aa01512.1.p|PACid:30252328	1.9234	3.79316	<.0001	2	Lipids metabolism	AT1G47480.1	alpha/beta-Hydrolases superfamily protein	AT1G47480.1
D3W	3837	Pavir.J01866.1	30284124	Pavir.J01866.1.p|PACid:30284124	1.1165	2.1682	<.0001	8	Major CHO metabolism	AT1G73370.1	sucrose synthase 6	AT1G73370.1
D3W	2045	Pavir.J37748.1	30220994	Pavir.J37748.1.p|PACid:30220994	1.1372	2.19954	<.0001	16	Major CHO metabolism	AT3G46970.1	alpha-glucan phosphorylase 2	AT3G46970.1
D3W	5278	Pavir.J15987.1	30244300	Pavir.J15987.1.p|PACid:30244300	1.2645	2.40244	<.0001	5	Major CHO metabolism	AT3G29320.1	Glycosyl transferase, family 35	AT3G29320.1
D3W	2914	Pavir.J09198.1	30218083	Pavir.J09198.1.p|PACid:30218083	1.4907	2.81025	0.0061	3	Major CHO metabolism	AT1G27680.1	ADPGLC-PPase large subunit	AT1G27680.1
D3W	6322	Pavir.J10133.1	30243454	Pavir.J10133.1.p|PACid:30243454	1.8016	3.48607	<.0001	2	Major CHO metabolism	AT5G48300.1	ADP glucose pyrophosphorylase 1	AT5G48300.1
D3W	1378	Pavir.J01199.1	30263609	Pavir.J01199.1.p|PACid:30263609	1.8301	3.55562	<.0001	24	Major CHO metabolism	AT5G03650.1	starch branching enzyme 2.2	AT5G03650.1
D3W	2006	Pavir.Fb00791.1	30280037	Pavir.Fb00791.1.p|PACid:30280037	1.8305	3.5566	<.0001	8	Major CHO metabolism	AT5G48300.1	ADP glucose pyrophosphorylase 1	AT5G48300.1
D3W	760	Pavir.J27092.1	30208100	Pavir.J27092.1.p|PACid:30208100	1.3503	2.54965	<.0001	9	Metal binding	AT4G14030.1	selenium-binding protein 1	AT4G14030.1
D3W	6939	Pavir.Ea00501.1	30230246	Pavir.Ea00501.1.p|PACid:30230246	1.7065	3.26368	0.0003	2	Metal binding	AT3G09390.1	metallothionein 2A	AT3G09390.1
D3W	3930	Pavir.J34655.1	30270543	Pavir.J34655.1.p|PACid:30270543	1.289	2.44359	<.0001	3	Minor CHO metabolism	AT2G37770.2	NAD(P)-linked oxidoreductase superfamily protein	AT2G37770.2
D3W	6529	Pavir.J15860.1	30275456	Pavir.J15860.1.p|PACid:30275456	1.9469	3.85545	<.0001	5	Minor CHO metabolism	AT2G37770.2	NAD(P)-linked oxidoreductase superfamily protein	AT2G37770.2
D3W	3317	Pavir.Ea02163.1	30231351	Pavir.Ea02163.1.p|PACid:30231351	-1.2272	0.427146	<.0001	7	Mitochondrial electron transport / ATP synthesis	AT3G15640.1	Rubredoxin-like superfamily protein	AT3G15640.1
D3W	1960	Pavir.Eb02048.1	30313661	Pavir.Eb02048.1.p|PACid:30313661	-1.1337	0.455745	<.0001	16	Mitochondrial electron transport / ATP synthesis	AT3G15640.1	Rubredoxin-like superfamily protein	AT3G15640.1
D3W	9425	Pavir.J22241.1	30302017	Pavir.J22241.1.p|PACid:30302017	1.0645	2.09144	0.0001	2	Mitochondrial electron transport / ATP synthesis	AT3G62790.1	NADH-ubiquinone oxidoreductase-related	AT3G62790.1
D3W	4195	Pavir.Ib00181.1	30239939	Pavir.Ib00181.1.p|PACid:30239939	1.20224	2.30097	<.0001	7	Mitochondrial electron transport / ATP synthesis	AT2G02050.1	NADH-ubiquinone oxidoreductase B18 subunit, putative	AT2G02050.1
D3W	4016	Pavir.Ba03478.1	30291380	Pavir.Ba03478.1.p|PACid:30291380	1.2498	2.37808	<.0001	4	Mitochondrial electron transport / ATP synthesis	AT5G25450.1	Cytochrome bd ubiquinol oxidase, 14kDa subunit	AT5G25450.1
D3W	5220	Pavir.J00971.1	30301823	Pavir.J00971.1.p|PACid:30301823	1.269	2.40994	<.0001	4	Mitochondrial electron transport / ATP synthesis	AT4G34700.1	LYR family of Fe/S cluster biogenesis protein	AT4G34700.1
D3W	6353	Pavir.J08720.1	30295101	Pavir.J08720.1.p|PACid:30295101	1.27	2.41162	<.0001	4	Mitochondrial electron transport / ATP synthesis	AT1G22450.1	cytochrome C oxidase 6B	AT1G22450.1
D3W	8129	Pavir.Ia00431.1	30211473	Pavir.Ia00431.1.p|PACid:30211473	1.3013	2.46451	<.0001	2	Mitochondrial electron transport / ATP synthesis	AT4G37830.1	cytochrome c oxidase-related	AT4G37830.1
D3W	1413	Pavir.Fa00648.1	30186795	Pavir.Fa00648.1.p|PACid:30186795	1.3425	2.5359	<.0001	5	Mitochondrial electron transport / ATP synthesis	AT3G52300.1	ATP synthase D chain, mitochondrial	AT3G52300.1
D3W	8159	Pavir.Ca00288.1	30204466	Pavir.Ca00288.1.p|PACid:30204466	1.4037	2.64579	0.0003	2	Mitochondrial electron transport / ATP synthesis	AT1G15120.1	Ubiquinol-cytochrome C reductase hinge protein	AT1G15120.1
D3W	5702	Pavir.J00979.1	30218528	Pavir.J00979.1.p|PACid:30218528	1.0131	2.01824	0.0001	5	Phyto-hormone metabolism	AT4G16770.1	2-oxoglutarate (2OG) and Fe(II)-dependent oxygenase superfamily protein	AT4G16770.1
D3W	7746	Pavir.Fa00674.1	30188302	Pavir.Fa00674.1.p|PACid:30188302	1.0234	2.0327	0.0003	2	Phyto-hormone metabolism	AT1G45249.1	abscisic acid responsive elements-binding factor 2	AT1G45249.1
D3W	6451	Pavir.Ca02100.1	30204177	Pavir.Ca02100.1.p|PACid:30204177	1.0849	2.12123	0.0002	3	Phyto-hormone metabolism	AT3G22400.1	PLAT/LH2 domain-containing lipoxygenase family protein	AT3G22400.1
D3W	829	Pavir.Ib03775.1	30239410	Pavir.Ib03775.1.p|PACid:30239410	1.11202	2.16148	<.0001	34	Phyto-hormone metabolism	AT2G33830.2	Dormancy/auxin associated family protein	AT2G33830.2
D3W	7357	Pavir.Ea00295.1	30226575	Pavir.Ea00295.1.p|PACid:30226575	1.161	2.23612	0.0033	3	Phyto-hormone metabolism	AT1G03400.1	2-oxoglutarate (2OG) and Fe(II)-dependent oxygenase superfamily protein	AT1G03400.1
D3W	993	Pavir.Cb00761.1	30268661	Pavir.Cb00761.1.p|PACid:30268661	1.17382	2.25608	<.0001	23	Phyto-hormone metabolism	AT5G13200.1	GRAM domain family protein	AT5G13200.1
D3W	2286	Pavir.J01160.1	30306248	Pavir.J01160.1.p|PACid:30306248	1.353	2.55443	<.0001	6	Phyto-hormone metabolism	AT3G22850.1	Aluminium induced protein with YGL and LRDR motifs	AT3G22850.1
D3W	1647	Pavir.Ca02189.1	30206971	Pavir.Ca02189.1.p|PACid:30206971	1.45133	2.7346	<.0001	29	Phyto-hormone metabolism	AT5G13200.1	GRAM domain family protein	AT5G13200.1
D3W	7446	Pavir.J06494.1	30286195	Pavir.J06494.1.p|PACid:30286195	1.6625	3.16565	<.0001	2	Phyto-hormone metabolism	AT2G14900.1	Gibberellin-regulated family protein	AT2G14900.1
D3W	186	Pavir.J00130.1	30200135	Pavir.J00130.1.p|PACid:30200135	1.9976	3.99335	<.0001	5	Phyto-hormone metabolism	AT1G60730.1	NAD(P)-linked oxidoreductase superfamily protein	AT1G60730.1
D3W	2354	Pavir.Ca02021.1	30203609	Pavir.Ca02021.1.p|PACid:30203609	-1.2452	0.421849	<.0001	3	Protein degradation	AT1G55860.2	ubiquitin-protein ligase 1	AT1G55860.2
D3W	6614	Pavir.Aa00552.1	30252815	Pavir.Aa00552.1.p|PACid:30252815	-1.2343	0.425049	<.0001	4	Protein degradation	AT3G19170.1	presequence protease 1	AT3G19170.1
D3W	625	Pavir.Ib01386.1	30237233	Pavir.Ib01386.1.p|PACid:30237233	-1.01364	0.495295	<.0001	15	Protein degradation	AT4G29040.1	regulatory particle AAA-ATPase 2A	AT4G29040.1
D3W	4131	Pavir.J03989.1	30196562	Pavir.J03989.1.p|PACid:30196562	1.0759	2.10804	0.0006	2	Protein degradation	AT1G15000.1	serine carboxypeptidase-like 50	AT1G15000.1
D3W	1768	Pavir.J26133.1	30245215	Pavir.J26133.1.p|PACid:30245215	1.0793	2.11301	<.0001	5	Protein degradation	AT1G09850.1	xylem bark cysteine peptidase 3	AT1G09850.1
D3W	3096	Pavir.Bb01503.1	30300143	Pavir.Bb01503.1.p|PACid:30300143	1.1473	2.21499	<.0001	10	Protein degradation	AT2G22980.1	serine carboxypeptidase-like 13	AT2G22980.1
D3W	2348	Pavir.J36542.1	30207798	Pavir.J36542.1.p|PACid:30207798	1.1696	2.24949	<.0001	14	Protein degradation	AT1G03230.1	Eukaryotic aspartyl protease family protein	AT1G03230.1
D3W	455	Pavir.Eb01124.1	30311582	Pavir.Eb01124.1.p|PACid:30311582	1.17027	2.25054	<.0001	34	Protein degradation	AT3G12490.2	cystatin B	AT3G12490.2
D3W	4482	Pavir.J39422.1	30246795	Pavir.J39422.1.p|PACid:30246795	1.1893	2.28042	0.0009	2	Protein degradation	AT3G14240.1	Subtilase family protein	AT3G14240.1
D3W	5914	Pavir.J20242.1	30185156	Pavir.J20242.1.p|PACid:30185156	1.2951	2.45394	<.0001	3	Protein degradation	AT3G12700.2	Eukaryotic aspartyl protease family protein	AT3G12700.2
D3W	4612	Pavir.J12532.1	30245869	Pavir.J12532.1.p|PACid:30245869	1.396	2.63171	<.0001	6	Protein degradation	AT1G03220.1	Eukaryotic aspartyl protease family protein	AT1G03220.1
D3W	3136	Pavir.Ib01812.1	30240256	Pavir.Ib01812.1.p|PACid:30240256	1.4206	2.67697	<.0001	4	Protein degradation	AT5G47550.1	Cystatin/monellin superfamily protein	AT5G47550.1
D3W	4307	Pavir.Eb03276.1	30312971	Pavir.Eb03276.1.p|PACid:30312971	1.454	2.73967	<.0001	9	Protein degradation	AT5G65760.1	Serine carboxypeptidase S28 family protein	AT5G65760.1
D3W	6195	Pavir.Da01644.1	30192625	Pavir.Da01644.1.p|PACid:30192625	1.0136	2.01894	<.0001	4	Protein modification	AT1G53670.1	methionine sulfoxide reductase B 1	AT1G53670.1
D3W	214	Pavir.J01318.1	30285243	Pavir.J01318.1.p|PACid:30285243	-1.0908	0.469501	0.0035	2	Protein synthesis	AT3G13920.1	eukaryotic translation initiation factor 4A1	AT3G13920.1
D3W	2468	Pavir.J11476.1	30275547	Pavir.J11476.1.p|PACid:30275547	-1.0213	0.492672	<.0001	5	Protein synthesis	AT4G20980.1	Eukaryotic translation initiation factor 3 subunit 7 (eIF-3)	AT4G20980.1
D3W	8141	Pavir.Fb00693.1	30280576	Pavir.Fb00693.1.p|PACid:30280576	1.1289	2.18692	0.0003	2	Protein targeting & vesicle tansport	AT5G50810.1	translocase inner membrane subunit 8	AT5G50810.1
D3W	4433	Pavir.Ib03224.1	30242248	Pavir.Ib03224.1.p|PACid:30242248	1.2495	2.37759	<.0001	10	Protein targeting & vesicle tansport	AT3G46560.1	Tim10/DDP family zinc finger protein	AT3G46560.1
D3W	5235	Pavir.Aa00928.1	30251755	Pavir.Aa00928.1.p|PACid:30251755	1.4079	2.65351	0.0004	2	Protein targeting & vesicle tansport	AT1G61570.1	translocase of the inner mitochondrial membrane 13	AT1G61570.1
D3W	2509	Pavir.J08185.1	30185137	Pavir.J08185.1.p|PACid:30185137	2.1555	4.45523	<.0001	12	Protein targeting & vesicle tansport	AT4G16160.2	Mitochondrial import inner membrane translocase subunit Tim17/Tim22/Tim23 family protein	AT4G16160.2
D3W	5094	Pavir.Da01876.1	30194692	Pavir.Da01876.1.p|PACid:30194692	1.0041	2.00569	<.0001	5	Redox balance	AT2G25080.1	glutathione peroxidase 1	AT2G25080.1
D3W	7095	Pavir.J14234.1	30236731	Pavir.J14234.1.p|PACid:30236731	1.0307	2.04302	0.0031	2	Redox balance	AT3G26060.1	Thioredoxin superfamily protein	AT3G26060.1
D3W	1281	Pavir.Gb01642.1	30222355	Pavir.Gb01642.1.p|PACid:30222355	1.05113	2.07215	<.0001	32	Redox balance	AT4G08390.1	stromal ascorbate peroxidase	AT4G08390.1
D3W	1400	Pavir.Bb03649.1	30296554	Pavir.Bb03649.1.p|PACid:30296554	1.08078	2.11518	<.0001	11	Redox balance	AT1G08830.1	copper/zinc superoxide dismutase 1	AT1G08830.1
D3W	945	Pavir.Ca00243.1	30203089	Pavir.Ca00243.1.p|PACid:30203089	1.1044	2.15009	<.0001	8	Redox balance	AT4G08390.1	stromal ascorbate peroxidase	AT4G08390.1
D3W	745	Pavir.J17936.1	30295599	Pavir.J17936.1.p|PACid:30295599	1.1108	2.15965	<.0001	7	Redox balance	AT4G08390.1	stromal ascorbate peroxidase	AT4G08390.1
D3W	4682	Pavir.Gb02261.1	30223273	Pavir.Gb02261.1.p|PACid:30223273	1.3782	2.59944	<.0001	15	Redox balance	AT4G35000.1	ascorbate peroxidase 3	AT4G35000.1
D3W	255	Pavir.Fb02222.1	30279249	Pavir.Fb02222.1.p|PACid:30279249	1.3875	2.61625	<.0001	18	Redox balance	AT2G28190.1	copper/zinc superoxide dismutase 2	AT2G28190.1
D3W	5022	Pavir.Ab02318.1	30235492	Pavir.Ab02318.1.p|PACid:30235492	1.4701	2.77041	<.0001	3	Redox balance	AT5G40370.1	Glutaredoxin family protein	AT5G40370.1
D3W	8760	Pavir.J14669.1	30283747	Pavir.J14669.1.p|PACid:30283747	1.1364	2.19832	0.0002	2	Regulation of transcription	AT5G02460.1	Dof-type zinc finger DNA-binding family protein	AT5G02460.1
D3W	7509	Pavir.Ea03945.1	30231586	Pavir.Ea03945.1.p|PACid:30231586	1.4248	2.68477	<.0001	2	Regulation of transcription	AT3G02830.1	zinc finger protein 1	AT3G02830.1
D3W	4025	Pavir.Ba01379.1	30293316	Pavir.Ba01379.1.p|PACid:30293316	1.6848	3.21496	<.0001	9	Regulation of transcription	AT1G20696.3	high mobility group B3	AT1G20696.3
D3W	6415	Pavir.Ia04404.1	30211920	Pavir.Ia04404.1.p|PACid:30211920	3.4901	11.2363	<.0001	2	Regulation of transcription	AT5G42290.1	transcription activator-related	AT5G42290.1
D3W	4585	Pavir.Ia00088.1	30209179	Pavir.Ia00088.1.p|PACid:30209179	1.1238	2.1792	<.0001	4	RNA processing	AT1G24450.1	Ribonuclease III family protein	AT1G24450.1
D3W	4870	Pavir.Bb02672.1	30301689	Pavir.Bb02672.1.p|PACid:30301689	1.3883	2.6177	<.0001	3	RNA processing	AT1G14220.1	Ribonuclease T2 family protein	AT1G14220.1
D3W	5050	Pavir.Ba01215.1	30290531	Pavir.Ba01215.1.p|PACid:30290531	2.8078	7.00216	<.0001	2	RNA processing	AT1G14220.1	Ribonuclease T2 family protein	AT1G14220.1
D3W	4519	Pavir.Cb00701.1	30268632	Pavir.Cb00701.1.p|PACid:30268632	-1.2356	0.424666	<.0001	5	S-assimilation	AT3G01910.1	sulfite oxidase	AT3G01910.1
D3W	6139	Pavir.J32143.1	30201712	Pavir.J32143.1.p|PACid:30201712	-1.0929	0.468818	0.0033	2	Secondary metabolism	AT5G47770.1	farnesyl diphosphate synthase 1	AT5G47770.1
D3W	1652	Pavir.Gb00413.1	30223284	Pavir.Gb00413.1.p|PACid:30223284	1.01211	2.01686	<.0001	19	Secondary metabolism	AT1G61720.1	NAD(P)-binding Rossmann-fold superfamily protein	AT1G61720.1
D3W	4429	Pavir.Ea03286.1	30226410	Pavir.Ea03286.1.p|PACid:30226410	1.0434	2.06108	<.0001	7	Secondary metabolism	AT5G58490.1	NAD(P)-binding Rossmann-fold superfamily protein	AT5G58490.1
D3W	7156	Pavir.Aa01510.1	30250971	Pavir.Aa01510.1.p|PACid:30250971	1.1855	2.27442	<.0001	3	Secondary metabolism	AT5G13930.1	Chalcone and stilbene synthase family protein	AT5G13930.1
D3W	5952	Pavir.Eb03776.1	30311412	Pavir.Eb03776.1.p|PACid:30311412	1.4641	2.75891	0.0003	2	Secondary metabolism	AT5G58490.1	NAD(P)-binding Rossmann-fold superfamily protein	AT5G58490.1
D3W	1712	Pavir.Fa00854.1	30186975	Pavir.Fa00854.1.p|PACid:30186975	-1.7421	0.298934	<.0001	7	Signaling regulation	AT3G02520.1	general regulatory factor 7	AT3G02520.1
D3W	1434	Pavir.Aa01534.1	30249831	Pavir.Aa01534.1.p|PACid:30249831	-1.5535	0.340683	<.0001	5	Signaling regulation	AT3G02520.1	general regulatory factor 7	AT3G02520.1
D3W	1653	Pavir.Gb01520.1	30221920	Pavir.Gb01520.1.p|PACid:30221920	-1.5008	0.353357	<.0001	3	Signaling regulation	AT3G02520.1	general regulatory factor 7	AT3G02520.1
D3W	3133	Pavir.J24263.1	30220715	Pavir.J24263.1.p|PACid:30220715	-1.2761	0.41291	0.0003	3	Signaling regulation	AT1G78300.1	general regulatory factor 2	AT1G78300.1
D3W	7231	Pavir.Ia01250.1	30214946	Pavir.Ia01250.1.p|PACid:30214946	-1.2223	0.428599	0.0055	2	Signaling regulation	AT4G26570.1	calcineurin B-like 3	AT4G26570.1
D3W	6550	Pavir.J01629.1	30219376	Pavir.J01629.1.p|PACid:30219376	-1.0356	0.487813	0.0247	3	Signaling regulation	AT5G44460.1	calmodulin like 43	AT5G44460.1
D3W	2529	Pavir.Ba03245.1	30289089	Pavir.Ba03245.1.p|PACid:30289089	-1.0083	0.497132	<.0001	11	Signaling regulation	AT1G21240.1	wall associated kinase 3	AT1G21240.1
D3W	6789	Pavir.Cb00876.1	30269914	Pavir.Cb00876.1.p|PACid:30269914	1.0305	2.04273	<.0001	6	Signaling regulation	AT3G05490.1	ralf-like 22	AT3G05490.1
D3W	1825	Pavir.Eb00944.1	30309163	Pavir.Eb00944.1.p|PACid:30309163	1.13125	2.19048	<.0001	20	Signaling regulation	AT4G15800.1	ralf-like 33	AT4G15800.1
D3W	1725	Pavir.Ea00048.1	30230356	Pavir.Ea00048.1.p|PACid:30230356	1.2905	2.44613	<.0001	4	Signaling regulation	AT4G20260.5	plasma-membrane associated cation-binding protein 1	AT4G20260.5
D3W	6224	Pavir.Eb03962.1	30311667	Pavir.Eb03962.1.p|PACid:30311667	1.59	3.01049	<.0001	4	Signaling regulation	AT3G28040.1	Leucine-rich receptor-like protein kinase family protein	AT3G28040.1
D3W	5247	Pavir.Ib03226.1	30237176	Pavir.Ib03226.1.p|PACid:30237176	1.5999	3.03122	0.0001	2	Signaling regulation	AT1G70520.1	cysteine-rich RLK (RECEPTOR-like protein kinase) 2	AT1G70520.1
D3W	5258	Pavir.Bb03618.1	30300930	Pavir.Bb03618.1.p|PACid:30300930	1.6056	3.04322	<.0001	7	Signaling regulation	AT4G15800.1	ralf-like 33	AT4G15800.1
D3W	1711	Pavir.Eb00019.1	30314169	Pavir.Eb00019.1.p|PACid:30314169	1.7455	3.35311	<.0001	8	Signaling regulation	AT4G20260.5	plasma-membrane associated cation-binding protein 1	AT4G20260.5
D3W	3714	Pavir.Ea01561.1	30227923	Pavir.Ea01561.1.p|PACid:30227923	1.7654	3.39968	<.0001	9	Signaling regulation	AT4G23180.1	cysteine-rich RLK (RECEPTOR-like protein kinase) 10	AT4G23180.1
D3W	5028	Pavir.Ea02983.1	30228167	Pavir.Ea02983.1.p|PACid:30228167	1.5663	2.96144	<.0001	5	TCA cycle	AT1G79750.1	NADP-malic enzyme 4	AT1G79750.1
D3W	2985	Pavir.Da01207.1	30193798	Pavir.Da01207.1.p|PACid:30193798	2.2157	4.64507	<.0001	5	TCA cycle	AT1G24180.1	Thiamin diphosphate-binding fold (THDP-binding) superfamily protein	AT1G24180.1
D3W	2125	Pavir.J16984.1	30307708	Pavir.J16984.1.p|PACid:30307708	-1.4858	0.35705	0.0002	3	Transport	AT5G54750.1	Transport protein particle (TRAPP) component	AT5G54750.1
D3W	6929	Pavir.Da00391.1	30192487	Pavir.Da00391.1.p|PACid:30192487	-1.0591	0.479931	0.0145	2	Transport	AT5G44790.1	copper-exporting ATPase / responsive-to-antagonist 1 / copper-transporting ATPase (RAN1)	AT5G44790.1
D3W	5540	Pavir.J11011.1	30288148	Pavir.J11011.1.p|PACid:30288148	1.1095	2.15771	<.0001	6	Transport	AT2G37360.1	ABC-2 type transporter family protein	AT2G37360.1
D3W	523	Pavir.J08319.1	30216763	Pavir.J08319.1.p|PACid:30216763	1.1346	2.19558	0.0021	2	Transport	AT3G01390.1	vacuolar membrane ATPase 10	AT3G01390.1
D3W	4311	Pavir.Ab02274.1	30236541	Pavir.Ab02274.1.p|PACid:30236541	1.1656	2.24326	<.0001	6	Transport	AT5G58070.1	temperature-induced lipocalin	AT5G58070.1
D3W	558	Pavir.Ia00950.1	30212938	Pavir.Ia00950.1.p|PACid:30212938	1.5504	2.92898	<.0001	3	Transport	AT5G62670.1	H(+)-ATPase 11	AT5G62670.1
D3W	7172	Pavir.J06780.1	30220067	Pavir.J06780.1.p|PACid:30220067	-2.67639	0.156432	<.0001	3	Unclassified	AT3G07570.1	Cytochrome b561/ferric reductase transmembrane with DOMON related domain	AT3G07570.1
D3W	7580	Pavir.J08753.1	30217806	Pavir.J08753.1.p|PACid:30217806	-1.4393	0.368746	0.0185	2	Unclassified	AT1G15230.1	N	AT1G15230.1
D3W	5813	Pavir.J07718.1	30257326	Pavir.J07718.1.p|PACid:30257326	-1.3027	0.405367	0.0001	2	Unclassified	AT5G41950.1	Tetratricopeptide repeat (TPR)-like superfamily protein	AT5G41950.1
D3W	6683	Pavir.Ga01385.1	30304502	Pavir.Ga01385.1.p|PACid:30304502	-1.1334	0.45584	<.0001	4	Unclassified	AT3G11330.1	plant intracellular ras group-related LRR 9	AT3G11330.1
D3W	7587	Pavir.J00527.1	30273515	Pavir.J00527.1.p|PACid:30273515	-1.1089	0.463647	0.0119	2	Unclassified	AT2G26590.1	regulatory particle non-ATPase 13	AT2G26590.1
D3W	4750	Pavir.J07986.1	30306280	Pavir.J07986.1.p|PACid:30306280	-1.0483	0.483538	0.0271	2	Unclassified	AT4G02450.1	HSP20-like chaperones superfamily protein	AT4G02450.1
D3W	4700	Pavir.Ga00514.1	30305071	Pavir.Ga00514.1.p|PACid:30305071	-1.0464	0.484175	0.0004	6	Unclassified	AT1G63220.1	Calcium-dependent lipid-binding (CaLB domain) family protein	AT1G63220.1
D3W	4890	Pavir.Ba01861.1	30289580	Pavir.Ba01861.1.p|PACid:30289580	1.0268	2.0375	<.0001	3	Unclassified	AT3G43540.1	Protein of unknown function (DUF1350)	AT3G43540.1
D3W	7791	Pavir.Ia04525.1	30210573	Pavir.Ia04525.1.p|PACid:30210573	1.029	2.04061	0.0001	2	Unclassified	AT5G64816.1	N	AT5G64816.1
D3W	3273	Pavir.Ca01986.1	30205594	Pavir.Ca01986.1.p|PACid:30205594	1.0315	2.04415	<.0001	2	Unclassified	AT1G07090.1	Protein of unknown function (DUF640)	AT1G07090.1
D3W	4247	Pavir.Gb00667.1	30221854	Pavir.Gb00667.1.p|PACid:30221854	1.0505	2.07125	<.0001	7	Unclassified	AT4G13200.1	N	AT4G13200.1
D3W	5947	Pavir.Aa00186.1	30249333	Pavir.Aa00186.1.p|PACid:30249333	1.0554	2.07829	<.0001	2	Unclassified	AT2G12400.1	N	AT2G12400.1
D3W	5691	Pavir.Ga00970.1	30305322	Pavir.Ga00970.1.p|PACid:30305322	1.0619	2.08768	<.0001	2	Unclassified	AT4G00290.1	Mechanosensitive ion channel protein	AT4G00290.1
D3W	2837	Pavir.J30395.1	30283707	Pavir.J30395.1.p|PACid:30283707	1.0701	2.09958	<.0001	11	Unclassified	AT3G21360.1	2-oxoglutarate (2OG) and Fe(II)-dependent oxygenase superfamily protein	AT3G21360.1
D3W	327	Pavir.Ab00294.1	30233308	Pavir.Ab00294.1.p|PACid:30233308	1.07437	2.1058	<.0001	26	Unclassified	AT2G21870.1	copper ion binding;cobalt ion binding;zinc ion binding	AT2G21870.1
D3W	707	Pavir.Ia00007.1	30211640	Pavir.Ia00007.1.p|PACid:30211640	1.09699	2.13908	<.0001	34	Unclassified	AT1G21680.1	DPP6 N-terminal domain-like protein	AT1G21680.1
D3W	7552	Pavir.Ab00129.1	30234167	Pavir.Ab00129.1.p|PACid:30234167	1.1025	2.14726	0.0001	2	Unclassified	AT1G32260.1	N	AT1G32260.1
D3W	3455	Pavir.Ga02727.1	30302629	Pavir.Ga02727.1.p|PACid:30302629	1.1166	2.16835	<.0001	9	Unclassified	AT1G20225.1	Thioredoxin superfamily protein	AT1G20225.1
D3W	7588	Pavir.Ia02273.1	30214274	Pavir.Ia02273.1.p|PACid:30214274	1.1425	2.20763	<.0001	3	Unclassified	AT2G44870.1	N	AT2G44870.1
D3W	1721	Pavir.Ca01801.1	30205996	Pavir.Ca01801.1.p|PACid:30205996	1.16451	2.24157	<.0001	24	Unclassified	AT1G29850.1	double-stranded DNA-binding family protein	AT1G29850.1
D3W	2787	Pavir.Fa01008.1	30186143	Pavir.Fa01008.1.p|PACid:30186143	1.18204	2.26897	<.0001	16	Unclassified	AT2G46750.1	D-arabinono-1,4-lactone oxidase family protein	AT2G46750.1
D3W	4342	Pavir.J05150.1	30200200	Pavir.J05150.1.p|PACid:30200200	1.1869	2.27663	<.0001	7	Unclassified	AT5G03880.1	Thioredoxin family protein	AT5G03880.1
D3W	7403	Pavir.Eb03564.1	30313189	Pavir.Eb03564.1.p|PACid:30313189	1.1915	2.2839	<.0001	3	Unclassified	AT2G38550.1	Transmembrane proteins 14C	AT2G38550.1
D3W	8346	Pavir.Bb01883.1	30296571	Pavir.Bb01883.1.p|PACid:30296571	1.1956	2.2904	0.0002	2	Unclassified	AT5G16940.1	carbon-sulfur lyases	AT5G16940.1
D3W	7544	Pavir.J17031.1	30256555	Pavir.J17031.1.p|PACid:30256555	1.1988	2.29549	<.0001	3	Unclassified	AT4G21110.1	G10 family protein	AT4G21110.1
D3W	2722	Pavir.J01632.1	30273203	Pavir.J01632.1.p|PACid:30273203	1.21143	2.31567	<.0001	17	Unclassified	AT1G71950.1	Proteinase inhibitor, propeptide	AT1G71950.1
D3W	5906	Pavir.Ib00790.1	30242842	Pavir.Ib00790.1.p|PACid:30242842	1.2232	2.33464	<.0001	3	Unclassified	AT5G17610.1	N	AT5G17610.1
D3W	4187	Pavir.J05274.1	30201830	Pavir.J05274.1.p|PACid:30201830	1.2281	2.34258	<.0001	12	Unclassified	AT5G66780.1	N	AT5G66780.1
D3W	5345	Pavir.Cb02192.1	30268808	Pavir.Cb02192.1.p|PACid:30268808	1.2381	2.35888	0.0029	2	Unclassified	AT2G38540.1	lipid transfer protein 1	AT2G38540.1
D3W	6561	Pavir.Da01251.1	30191401	Pavir.Da01251.1.p|PACid:30191401	1.24	2.36199	0.0003	3	Unclassified	AT2G15780.1	Cupredoxin superfamily protein	AT2G15780.1
D3W	8238	Pavir.Ia03897.1	30210361	Pavir.Ia03897.1.p|PACid:30210361	1.2684	2.40894	<.0001	2	Unclassified	AT4G00026.1	N	AT4G00026.1
D3W	5392	Pavir.Db02130.1	30260942	Pavir.Db02130.1.p|PACid:30260942	1.2772	2.42368	0.0004	2	Unclassified	AT3G02645.1	Plant protein of unknown function (DUF247)	AT3G02645.1
D3W	5649	Pavir.Cb01443.1	30269304	Pavir.Cb01443.1.p|PACid:30269304	1.3414	2.53397	<.0001	6	Unclassified	AT2G41200.1	N	AT2G41200.1
D3W	4927	Pavir.Bb00970.1	30298835	Pavir.Bb00970.1.p|PACid:30298835	1.3677	2.58059	0.0002	2	Unclassified	AT4G15610.1	Uncharacterised protein family (UPF0497)	AT4G15610.1
D3W	6461	Pavir.Ib03696.1	30241723	Pavir.Ib03696.1.p|PACid:30241723	1.3962	2.63207	<.0001	3	Unclassified	AT4G31830.1	N	AT4G31830.1
D3W	3927	Pavir.J38252.1	30191144	Pavir.J38252.1.p|PACid:30191144	1.4182	2.67252	<.0001	10	Unclassified	AT1G60420.1	DC1 domain-containing protein	AT1G60420.1
D3W	3139	Pavir.Gb01551.1	30224863	Pavir.Gb01551.1.p|PACid:30224863	1.471	2.77214	<.0001	8	Unclassified	AT4G39730.1	Lipase/lipooxygenase, PLAT/LH2 family protein	AT4G39730.1
D3W	27	Pavir.Ia03444.1	30214087	Pavir.Ia03444.1.p|PACid:30214087	1.5192	2.86632	<.0001	45	Unclassified	AT2G39050.1	hydroxyproline-rich glycoprotein family protein	AT2G39050.1
D3W	6015	Pavir.J06934.1	30275192	Pavir.J06934.1.p|PACid:30275192	1.633	3.10157	<.0001	2	Unclassified	AT5G51720.1	2 iron, 2 sulfur cluster binding	AT5G51720.1
D3W	7026	Pavir.J27601.1	30246867	Pavir.J27601.1.p|PACid:30246867	1.65	3.13834	<.0001	3	Unclassified	AT3G05500.1	Rubber elongation factor protein (REF)	AT3G05500.1
D3W	3587	Pavir.Fa01601.1	30186390	Pavir.Fa01601.1.p|PACid:30186390	1.8032	3.48993	<.0001	6	Unclassified	AT2G46760.1	D-arabinono-1,4-lactone oxidase family protein	AT2G46760.1
D3W	1409	Pavir.Ib03633.1	30239106	Pavir.Ib03633.1.p|PACid:30239106	1.873	3.66293	0.0022	2	Unclassified	AT3G46750.1	N	AT3G46750.1
D3W	7143	Pavir.Hb00971.1	30264344	Pavir.Hb00971.1.p|PACid:30264344	1.9238	3.79421	<.0001	6	Unclassified	AT5G07330.1	N	AT5G07330.1
D3W	2103	Pavir.Fa01556.1	30187567	Pavir.Fa01556.1.p|PACid:30187567	1.9529	3.87152	<.0001	14	Unclassified	AT1G32300.1	D-arabinono-1,4-lactone oxidase family protein	AT1G32300.1
D3W	5502	Pavir.J21027.1	30247869	Pavir.J21027.1.p|PACid:30247869	1.9649	3.90386	<.0001	3	Unclassified	AT1G02700.1	N	AT1G02700.1
D3W	5242	Pavir.J39622.1	30207856	Pavir.J39622.1.p|PACid:30207856	1.9896	3.97127	<.0001	2	Unclassified	AT3G05975.1	Late embryogenesis abundant (LEA) hydroxyproline-rich glycoprotein family	AT3G05975.1
D3W	992	Pavir.J02312.1	30294775	Pavir.J02312.1.p|PACid:30294775	2.05166	4.14583	<.0001	31	Unclassified	AT5G01300.1	PEBP (phosphatidylethanolamine-binding protein) family protein	AT5G01300.1
D3W	8942	Pavir.Bb00004.1	30300080	Pavir.Bb00004.1.p|PACid:30300080	2.14	4.40762	<.0001	2	Unclassified	AT5G45470.1	Protein of unknown function (DUF594)	AT5G45470.1
D3W	5990	Pavir.Gb00543.1	30223554	Pavir.Gb00543.1.p|PACid:30223554	2.9595	7.77854	<.0001	3	Unclassified	AT5G44310.2	Late embryogenesis abundant protein (LEA) family protein	AT5G44310.2
D3W	2207	Pavir.Ga00596.1	30302580	Pavir.Ga00596.1.p|PACid:30302580	3.0586	8.33164	<.0001	12	Unclassified	AT5G44310.2	Late embryogenesis abundant protein (LEA) family protein	AT5G44310.2
D3W	1530	Pavir.J28600.1	30202435	Pavir.J28600.1.p|PACid:30202435	3.2792	9.70817	<.0001	3	Unclassified	AT4G36600.1	Late embryogenesis abundant (LEA) protein	AT4G36600.1
D3W	445	Pavir.Ib00428.1	30242435	Pavir.Ib00428.1.p|PACid:30242435	3.3818	10.4237	<.0001	28	Unclassified	AT4G36600.1	Late embryogenesis abundant (LEA) protein	AT4G36600.1

## Sheet: RT2_DEPs
Functional group	RT2_D3W_up	RT2_D3W_Dn	RT2_D1W_up	RT2_D1W_Dn	RT2_SDT_up	RT2_SDT_Dn		Functional group	RT1_SDT_Up-DEPs	RT1_SDT_Dn-DEPs	RT1_D1WUp-DEPs	RT1-D1WDn-DEPs	RT1_D3W_Up-DEPs	RT1_D3W_Dn-DEPs
Abiotic / biotic stress / Development	46	2	17	23	42	1		Abiotic/biotic stress	40	1	56	0	70	4
Amino acid metabolism	6	1	1	17	13	1		Amino acid metabolism	8	0	11	0	0	0
Cell division & Cell cycle	3	0	0	2	0	0		Cell organization	5	0	4	0	4	1
Cell organization	3	0	2	15	5	0		Cell wall synthesis/modification	3	0	4	0	4	0
Cell wall synthesis / modification	8	0	0	23	5	1		Development	19	2	20	0	16	3
Development	11	0	9	9	16	1		DNA synthesis	3	1	4	0	3	0
DNA synthesis	1	0	0	4	4	0		Functional enzyme	37	1	47	2	47	4
Fermentation	0	0	0	3	0	1		Glycolysis	2	0	3	0	3	0
Functional enzyme	41	3	11	62	57	4		Lipids metabolism	3	5	2	3	3	6
Glycolysis	2	1	2	8	2	0		Major CHO metabolism	3	0	6	0	4	0
Lipids metabolism	8	5	1	16	9	0		Minor CHO metabolism	3	0	3	0	2	0
Major CHO metabolism	7	0	2	9	13	0		Mitochondrial electron transport / ATP synthesis	0	0	7	0	3	1
Metal binding	2	0	1	5	3	0		Nucleotide metabolism	4	0	1	0	0	0
Minor CHO metabolism	2	0	1	2	6	0		Phyto-hormone metabolism	8	0	10	0	9	0
Mitochondrial electron transport / ATP synthesis	8	2	1	5	10	1		Protein degradation	12	0	10	1	6	2
Nucleotide metabolism	0	0	0	6	3	1		Protein synthesis	0	0	1	2	2	10
Phyto-hormone metabolism	10	0	2	19	11	5		Protein targeting	3	0	5	0	4	4
Protein degradation	10	3	0	15	13	1		Redox balance	3	0	3	0	5	1
Protein modification	1	0	0	8	1	0		Regulation of transcription	3	5	4	1	4	4
Protein synthesis	0	2	0	37	4	1		RNA processing	3	0	3	0	2	2
Protein targeting & vesicle tansport	4	0	1	13	5	0		Secondary metabolism	14	0	4	0	4	0
Redox balance	9	0	1	5	11	0		Signaling regulation	8	3	8	0	6	12
Regulation of transcription	0	0	3	7	5	2		TCA cycle	3	0	2	0	2	0
RNA processing	3	0	1	1	4	0		Transport	3	0	10	0	4	1
S-assimilation	0	1	0	2	0	1		Unclassified	11	39	58	1	51	21
Secondary metabolism	4	1	0	27	6	1
Signaling regulation	8	7	3	29	16	1
TCA cycle	2	0	2	2	2	0
Transport	4	2	19	3	19	0
Unclassified	45	7	22	74	81	4

## Sheet: Fig3_DEPs
	Number of proteins in each functional group															Log2 (Number of proteins in each functional group)															Log2 (Number of proteins in each functional group)/Dn-regulated converted to negative values
Functional group	RT2_SDT_up	RT2_SDT_Dn	RT2_D1W_up	RT2_D1W_Dn	RT2_D3W_up	RT2_D3W_Dn	RT1_SDT_Up-DEPs	RT1_SDT_Dn-DEPs	RT1_D1WUp-DEPs	RT1-D1WDn-DEPs	RT1_D3W_Up-DEPs	RT1_D3W_Dn-DEPs		Functional group		RT2_SDT_up	RT2_SDT_Dn	RT2_D1W_up	RT2_D1W_Dn	RT2_D3W_up	RT2_D3W_Dn	RT1_SDT_Up-DEPs	RT1_SDT_Dn-DEPs	RT1_D1WUp-DEPs	RT1-D1WDn-DEPs	RT1_D3W_Up-DEPs	RT1_D3W_Dn-DEPs		Functional group		RT2_SDT_Up	RT2_SDT_Dn	RT2_D1W_Up	RT2_D1W_Dn	RT2_D3W_Up	RT2_D3W_Dn	RT1_SDT_Up	RT1_SDT_Dn	RT1_D1W_Up	RT1-D1W_Dn	RT1_D3W_Up	RT1_D3W_Dn
Abiotic / biotic stress / Development	42	1	17	23	46	2	40	1	56	0	70	4		Abiotic / biotic stress / Development	1	5.39232	0.05	4.08746	4.52356	5.52356	1	5.32193	0.05	5.80735	0	6.12928	2		Abiotic / biotic stress / Development	1	5.39232	-0.05	4.08746	-4.52356	5.52356	-1	5.32193	-0.05	5.80735	0	6.12928	-2
Functional enzyme	57	4	11	62	41	3	37	1	47	2	47	4		Functional enzyme	2	5.83289	2	3.45943	5.9542	5.35755	1.58496	5.20945	0.05	5.55459	1	5.55459	2		Functional enzyme	2	5.83289	-2	3.45943	-5.9542	5.35755	-1.58496	5.20945	-0.05	5.55459	-1	5.55459	-2
Development	16	1	9	9	11	0	19	2	20	0	16	3		Development	3	4	0.05	3.16993	3.16993	3.45943	0	4.24793	1	4.32193	0	4	1.58496		Development	3	4	-0.05	3.16993	-3.16993	3.45943	0	4.24793	-1	4.32193	0	4	-1.58496
Secondary metabolism	6	1	0	27	4	1	14	0	4	0	4	0		Secondary metabolism	4	2.58496	0.05	0	4.75489	2	0	3.80735	0	2	0	2	0		Secondary metabolism	4	2.58496	-0.05	0	-4.75489	2	0	3.80735	0	2	0	2	0
Protein degradation	13	1	0	15	10	3	12	0	10	1	6	2		Protein degradation	5	3.70044	0.05	0	3.90689	3.32193	1.58496	3.58496	0	3.32193	0.05	2.58496	1		Protein degradation	5	3.70044	-0.05	0	-3.90689	3.32193	-1.58496	3.58496	0	3.32193	-0.05	2.58496	-1
Unclassified	81	4	22	74	45	7	11	39	58	1	51	21		Unclassified	6	6.33985	2	4.45943	6.20945	5.49185	2.80735	3.45943	5.2854	5.85798	0.05	5.67243	4.39232		Unclassified	6	6.33985	-2	4.45943	-6.20945	5.49185	-2.80735	3.45943	-5.2854	5.85798	-0.05	5.67243	-4.39232
Amino acid metabolism	13	1	1	17	6	1	8	0	11	0	0	0		Amino acid metabolism	7	3.70044	0.05	0	4.08746	2.58496	0.05	3	0	3.45943	0	0	0		Amino acid metabolism	7	3.70044	-0.05	0	-4.08746	2.58496	-0.05	3	0	3.45943	0	0	0
Phyto-hormone metabolism	11	5	2	19	10	0	8	0	10	0	9	0		Phyto-hormone metabolism	8	3.45943	2.32193	1	4.24793	3.32193	0	3	0	3.32193	0	3.16993	0		Phyto-hormone metabolism	8	3.45943	-2.32193	1	-4.24793	3.32193	0	3	0	3.32193	0	3.16993	0
Signaling regulation	16	1	3	29	8	7	8	3	8	0	6	12		Signaling regulation	9	4	0.05	1.58496	4.85798	3	2.80735	3	1.58496	3	0	2.58496	3.58496		Signaling regulation	9	4	-0.05	1.58496	-4.85798	3	-2.80735	3	-1.58496	3	0	2.58496	-3.58496
Cell organization	5	0	2	15	3	0	5	0	4	0	4	1		Cell organization	10	2.32193	0	1	3.90689	1.58496	0	2.32193	0	2	0	2	0.05		Cell organization	10	2.32193	0	1	-3.90689	1.58496	0	2.32193	0	2	0	2	-0.05
Nucleotide metabolism	3	1	0	6	0	0	4	0	1	0	0	0		Nucleotide metabolism	11	1.58496	0.05	0	2.58496	0	0	2	0	0.05	0	0	0		Nucleotide metabolism	11	1.58496	-0.05	0	-2.58496	0	0	2	0	0.05	0	0	0
Cell wall synthesis / modification	5	1	0	23	8	0	3	0	4	0	4	0		Cell wall synthesis / modification	12	2.32193	0.05	0	4.52356	3	0	1.58496	0	2	0	2	0		Cell wall synthesis / modification	12	2.32193	-0.05	0	-4.52356	3	0	1.58496	0	2	0	2	0
DNA synthesis	4	0	0	4	1	0	3	1	4	0	3	0		DNA synthesis	13	2	0	0	2	0.05	0	1.58496	0.05	2	0	1.58496	0		DNA synthesis	13	2	0	0	-2	0.05	0	1.58496	-0.05	2	0	1.58496	0
Lipids metabolism	9	0	1	16	8	5	3	5	2	3	3	6		Lipids metabolism	14	3.16993	0	0.05	4	3	2.32193	1.58496	2.32193	1	1.58496	1.58496	2.58496		Lipids metabolism	14	3.16993	0	0.05	-4	3	-2.32193	1.58496	-2.32193	1	-1.58496	1.58496	-2.58496
Major CHO metabolism	13	0	2	9	7	0	3	0	6	0	4	0		Major CHO metabolism	15	3.70044	0	1	3.16993	2.80735	0	1.58496	0	2.58496	0	2	0		Major CHO metabolism	15	3.70044	0	1	-3.16993	2.80735	0	1.58496	0	2.58496	0	2	0
Minor CHO metabolism	6	0	1	2	2	0	3	0	3	0	2	0		Minor CHO metabolism	16	2.58496	0	0.05	1	1	0	1.58496	0	1.58496	0	1	0		Minor CHO metabolism	16	2.58496	0	0.05	-1	1	0	1.58496	0	1.58496	0	1	0
Protein targeting & vesicle tansport	5	0	1	13	4	0	3	0	5	0	4	4		Protein targeting & vesicle tansport	17	2.32193	0	0.05	3.70044	2	0	1.58496	0	2.32193	0	2	2		Protein targeting & vesicle tansport	17	2.32193	0	0.05	-3.70044	2	0	1.58496	0	2.32193	0	2	-2
Redox balance	11	0	1	5	9	0	3	0	3	0	5	1		Redox balance	18	3.45943	0	0.05	2.32193	3.16993	0	1.58496	0	1.58496	0	2.32193	0		Redox balance	18	3.45943	0	0.05	-2.32193	3.16993	0	1.58496	0	1.58496	0	2.32193	0
Regulation of transcription	5	2	3	7	0	0	3	5	4	1	4	4		Regulation of transcription	19	2.32193	1	1.58496	2.80735	0	0	1.58496	2.32193	2	0.05	2	2		Regulation of transcription	19	2.32193	-1	1.58496	-2.80735	0	0	1.58496	-2.32193	2	-0.05	2	-2
RNA processing	4	0	1	1	3	0	3	0	3	0	2	2		RNA processing	20	2	0	0	0.05	1.58496	0	1.58496	0	1.58496	0	1	1		RNA processing	20	2	0	0	-0.05	1.58496	0	1.58496	0	1.58496	0	1	-1
TCA cycle	2	0	2	2	2	0	3	0	2	0	2	0		TCA cycle	21	1	0	1	1	1	0	1.58496	0	1	0	1	0		TCA cycle	21	1	0	1	-1	1	0	1.58496	0	1	0	1	0
Transport	19	0	19	3	4	2	3	0	10	0	4	1		Transport	22	4.24793	0	4.24793	1.58496	2	1	1.58496	0	3.32193	0	2	0.05		Transport	22	4.24793	0	4.24793	-1.58496	2	-1	1.58496	0	3.32193	0	2	-0.05
Glycolysis	2	0	2	8	2	1	2	0	3	0	3	0		Glycolysis	23	1	0	1	3	1	0.05	1	0	1.58496	0	1.58496	0		Glycolysis	23	1	0	1	-3	1	-0.05	1	0	1.58496	0	1.58496	0
Mitochondrial electron transport / ATP synthesis	10	1	1	5	8	2	0	0	7	0	3	1		Mitochondrial electron transport / ATP synthesis	24	3.32193	0.05	0.05	2.32193	3	1	0	0	2.80735	0	1.58496	0.05		Mitochondrial electron transport / ATP synthesis	24	3.32193	-0.05	0.05	-2.32193	3	-1	0	0	2.80735	0	1.58496	-0.05
Protein modification	1	0	0	8	1	0	0	0	0	0	0	0		Protein modification	25	0	0	0	3	0.05	0	0	0	#NUM!	0	0	0		Protein modification	25	0	0	0	-3	0.05	0	0	0	0	0	0	0
Protein synthesis	4	1	0	37	0	2	0	0	1	2	2	10		Protein synthesis	26	2	0.05	0	5.20945	0	1	0	0	0.05	1	1	3.32193		Protein synthesis	26	2	-0.05	0	-5.20945	0	-1	0	0	0.05	-1	1	-3.32193
	363	25	101	439	243	36	201	57	286	10	258	76

## Sheet: Sheet1
Functional group		RT2_SDT_Up	RT2_D1W_Up	RT2_D3W_Up	RT1_SDT_Up	RT1_D1W_Up	RT1_D3W_Up		RT2_SDT_Dn	RT2_D1W_Dn	RT2_D3W_Dn	RT1_SDT_Dn	RT1-D1W_Dn	RT1_D3W_Dn
Abiotic / biotic stress / Development	1	5.39232	4.08746	5.52356	5.32193	5.80735	6.12928		-0.05	-4.52356	-1	-0.05	0	-2
Functional enzyme	2	5.83289	3.45943	5.35755	5.20945	5.55459	5.55459		-2	-5.9542	-1.58496	-0.05	-1	-2
Development	3	4	3.16993	3.45943	4.24793	4.32193	4		-0.05	-3.16993	0	-1	0	-1.58496
Secondary metabolism	4	2.58496	0	2	3.80735	2	2		-0.05	-4.75489	0	0	0	0
Protein degradation	5	3.70044	0	3.32193	3.58496	3.32193	2.58496		-0.05	-3.90689	-1.58496	0	-0.05	-1
Unclassified	6	6.33985	4.45943	5.49185	3.45943	5.85798	5.67243		-2	-6.20945	-2.80735	-5.2854	-0.05	-4.39232
Amino acid metabolism	7	3.70044	0	2.58496	3	3.45943	0		-0.05	-4.08746	-0.05	0	0	0
Phyto-hormone metabolism	8	3.45943	1	3.32193	3	3.32193	3.16993		-2.32193	-4.24793	0	0	0	0
Signaling regulation	9	4	1.58496	3	3	3	2.58496		-0.05	-4.85798	-2.80735	-1.58496	0	-3.58496
Cell organization	10	2.32193	1	1.58496	2.32193	2	2		0	-3.90689	0	0	0	-0.05
Nucleotide metabolism	11	1.58496	0	0	2	0.05	0		-0.05	-2.58496	0	0	0	0
Cell wall synthesis / modification	12	2.32193	0	3	1.58496	2	2		-0.05	-4.52356	0	0	0	0
DNA synthesis	13	2	0	0.05	1.58496	2	1.58496		0	-2	0	-0.05	0	0
Lipids metabolism	14	3.16993	0.05	3	1.58496	1	1.58496		0	-4	-2.32193	-2.32193	-1.58496	-2.58496
Major CHO metabolism	15	3.70044	1	2.80735	1.58496	2.58496	2		0	-3.16993	0	0	0	0
Minor CHO metabolism	16	2.58496	0.05	1	1.58496	1.58496	1		0	-1	0	0	0	0
Protein targeting & vesicle tansport	17	2.32193	0.05	2	1.58496	2.32193	2		0	-3.70044	0	0	0	-2
Redox balance	18	3.45943	0.05	3.16993	1.58496	1.58496	2.32193		0	-2.32193	0	0	0	0
Regulation of transcription	19	2.32193	1.58496	0	1.58496	2	2		-1	-2.80735	0	-2.32193	-0.05	-2
RNA processing	20	2	0	1.58496	1.58496	1.58496	1		0	-0.05	0	0	0	-1
TCA cycle	21	1	1	1	1.58496	1	1		0	-1	0	0	0	0
Transport	22	4.24793	4.24793	2	1.58496	3.32193	2		0	-1.58496	-1	0	0	-0.05
Glycolysis	23	1	1	1	1	1.58496	1.58496		0	-3	-0.05	0	0	0
Mitochondrial electron transport / ATP synthesis	24	3.32193	0.05	3	0	2.80735	1.58496		-0.05	-2.32193	-1	0	0	-0.05
Protein modification	25	0	0	0.05	0	0	0		0	-3	0	0	0	0
Protein synthesis	26	2	0	0	0	0.05	1		-0.05	-5.20945	-1	0	-1	-3.32193

## Sheet: RT1-SDT-DEPs
Treatment	pro_hit_num	pro_acc	pro_acc_ID	pro_ID	pro_acc_ID	log2_fold	fold_change	p_value	num_pep	Functional group	at_acc	at_annota								Functional group	RT1_SDT_Up-DEPs	RT1_SDT_Dn-DEPs
SDT	177	Pavir.J01963.1	Pavir.J01963.1.p|PACid:30218288	30218288	Pavir.J01963.1.p|PACid:30218288	-1.4712	0.360682167083992	<.0001	6	Abiotic/biotic stress	AT5G09590.1	mitochondrial HSO70 2								Abiotic/biotic stress	40	1
SDT	6215	Pavir.Ia02656.1	Pavir.Ia02656.1.p|PACid:30213207	30213207	Pavir.Ia02656.1.p|PACid:30213207	1.4171	2.67048170386314	0.0002	2	Abiotic/biotic stress	AT4G27670.1	heat shock protein 21								Amino acid metabolism	8	0
SDT	6406	Pavir.J09667.1	Pavir.J09667.1.p|PACid:30308125	30308125	Pavir.J09667.1.p|PACid:30308125	1.4505	2.73302754455979	<.0001	3	Abiotic/biotic stress	AT5G17540.1	HXXXD-type acyl-transferase family protein								Cell organization	5	0
SDT	6328	Pavir.J28620.1	Pavir.J28620.1.p|PACid:30314458	30314458	Pavir.J28620.1.p|PACid:30314458	1.4865	2.80208360168426	<.0001	3	Abiotic/biotic stress	AT5G24090.1	chitinase A								Cell wall synthesis/modification	3	0
SDT	1115	Pavir.J19824.1	Pavir.J19824.1.p|PACid:30189354	30189354	Pavir.J19824.1.p|PACid:30189354	1.49199	2.81276690314418	<.0001	4	Abiotic/biotic stress	AT5G59720.1	heat shock protein 18.2								Development	19	2
SDT	1168	Pavir.J37362.1	Pavir.J37362.1.p|PACid:30294839	30294839	Pavir.J37362.1.p|PACid:30294839	1.4955	2.81961854628963	<.0001	4	Abiotic/biotic stress	AT1G74310.1	heat shock protein 101								DNA synthesis	3	1
SDT	690	Pavir.Ib01026.1	Pavir.Ib01026.1.p|PACid:30238031	30238031	Pavir.Ib01026.1.p|PACid:30238031	1.4996	2.82764302693548	<.0001	11	Abiotic/biotic stress	AT4G27670.1	heat shock protein 21								Fermentation	3	0
SDT	744	Pavir.Eb00769.1	Pavir.Eb00769.1.p|PACid:30314162	30314162	Pavir.Eb00769.1.p|PACid:30314162	1.5182	2.86433453596155	<.0001	10	Abiotic/biotic stress	AT5G59720.1	heat shock protein 18.2								Functional enzyme	37	1
SDT	6242	Pavir.J31186.1	Pavir.J31186.1.p|PACid:30216617	30216617	Pavir.J31186.1.p|PACid:30216617	1.5316	2.89106290511903	0.0002	3	Abiotic/biotic stress	AT3G04720.1	pathogenesis-related 4								Glycolysis	2	0
SDT	5067	Pavir.J37978.1	Pavir.J37978.1.p|PACid:30197137	30197137	Pavir.J37978.1.p|PACid:30197137	1.5384	2.90472180806415	0.0002	2	Abiotic/biotic stress	AT5G59720.1	heat shock protein 18.2								Glyoxylate cycle	0	1
SDT	4091	Pavir.Bb00478.1	Pavir.Bb00478.1.p|PACid:30300637	30300637	Pavir.Bb00478.1.p|PACid:30300637	1.5577	2.94384150605298	<.0001	7	Abiotic/biotic stress	AT5G24090.1	chitinase A								Lipids metabolism	3	5
SDT	979	Pavir.Ca00609.1	Pavir.Ca00609.1.p|PACid:30204579	30204579	Pavir.Ca00609.1.p|PACid:30204579	1.57989	2.98947055284068	<.0001	17	Abiotic/biotic stress	AT2G38870.1	Serine protease inhibitor, potato inhibitor I-type family protein								Major CHO metabolism	3	0
SDT	519	Pavir.J29514.1	Pavir.J29514.1.p|PACid:30196199	30196199	Pavir.J29514.1.p|PACid:30196199	1.6004	3.03227374128014	<.0001	25	Abiotic/biotic stress	AT5G12030.1	heat shock protein 17.6A								Metal binding	2	0
SDT	6813	Pavir.J15194.1	Pavir.J15194.1.p|PACid:30216067	30216067	Pavir.J15194.1.p|PACid:30216067	1.6525	3.14377942881103	<.0001	2	Abiotic/biotic stress	AT3G10680.1	HSP20-like chaperones superfamily protein								Minor CHO metabolism	3	0
SDT	1501	Pavir.Ca00608.1	Pavir.Ca00608.1.p|PACid:30204384	30204384	Pavir.Ca00608.1.p|PACid:30204384	1.73456	3.32777986192179	<.0001	24	Abiotic/biotic stress	AT2G38870.1	Serine protease inhibitor, potato inhibitor I-type family protein								Nucleotide metabolism	4	0
SDT	2450	Pavir.J08876.1	Pavir.J08876.1.p|PACid:30275693	30275693	Pavir.J08876.1.p|PACid:30275693	1.7734	3.41858666565697	<.0001	17	Abiotic/biotic stress	AT3G12500.1	basic chitinase								Pentose phosphate pathway	0	1
SDT	3679	Pavir.Eb02336.1	Pavir.Eb02336.1.p|PACid:30308702	30308702	Pavir.Eb02336.1.p|PACid:30308702	1.7868	3.45048700594521	<.0001	4	Abiotic/biotic stress	AT2G21100.1	Disease resistance-responsive (dirigent-like protein) family protein								Phyto-hormone metabolism	8	0
SDT	3718	Pavir.J17471.1	Pavir.J17471.1.p|PACid:30294892	30294892	Pavir.J17471.1.p|PACid:30294892	1.8231	3.5384069965095	<.0001	11	Abiotic/biotic stress	AT5G39110.1	RmlC-like cupins superfamily protein								Protein degradation	12	0
SDT	478	Pavir.J21349.1	Pavir.J21349.1.p|PACid:30225604	30225604	Pavir.J21349.1.p|PACid:30225604	1.86022	3.63063022250011	<.0001	15	Abiotic/biotic stress	AT1G54050.1	HSP20-like chaperones superfamily protein								Protein modification	1	0
SDT	7280	Pavir.J15962.1	Pavir.J15962.1.p|PACid:30284434	30284434	Pavir.J15962.1.p|PACid:30284434	1.8609	3.63234188740618	<.0001	2	Abiotic/biotic stress	AT5G20970.1	HSP20-like chaperones superfamily protein								Protein targeting	3	0
SDT	3569	Pavir.Gb01434.1	Pavir.Gb01434.1.p|PACid:30221789	30221789	Pavir.Gb01434.1.p|PACid:30221789	1.892	3.71149390588513	<.0001	6	Abiotic/biotic stress	AT3G54420.1	homolog of carrot EP3-3 chitinase								Redox balance	3	0
SDT	33	Pavir.Ia03665.1	Pavir.Ia03665.1.p|PACid:30210947	30210947	Pavir.Ia03665.1.p|PACid:30210947	2.0277	4.0775427426519	<.0001	18	Abiotic/biotic stress	AT5G02500.1	heat shock cognate protein 70-1								Regulation of transcription	3	5
SDT	4687	Pavir.Ea02477.1	Pavir.Ea02477.1.p|PACid:30226286	30226286	Pavir.Ea02477.1.p|PACid:30226286	2.0323	4.090564643011	<.0001	3	Abiotic/biotic stress	AT5G24090.1	chitinase A								RNA processing	3	0
SDT	611	Pavir.J31919.1	Pavir.J31919.1.p|PACid:30199244	30199244	Pavir.J31919.1.p|PACid:30199244	2.0567	4.16033585861247	<.0001	7	Abiotic/biotic stress	AT5G52300.2	CAP160 protein								Secondary metabolism	14	0
SDT	2710	Pavir.Ia04457.1	Pavir.Ia04457.1.p|PACid:30209221	30209221	Pavir.Ia04457.1.p|PACid:30209221	2.0726	4.20644068212118	<.0001	4	Abiotic/biotic stress	AT3G12500.1	basic chitinase								Signaling regulation	8	3
SDT	2379	Pavir.Bb03197.1	Pavir.Bb03197.1.p|PACid:30299608	30299608	Pavir.Bb03197.1.p|PACid:30299608	2.0992	4.28471723953043	<.0001	12	Abiotic/biotic stress	AT4G11650.1	osmotin 34								TCA cycle	3	0
SDT	6674	Pavir.Hb01571.1	Pavir.Hb01571.1.p|PACid:30264315	30264315	Pavir.Hb01571.1.p|PACid:30264315	2.1132	4.32649879245074	<.0001	7	Abiotic/biotic stress	AT1G66100.1	Plant thionin								Transport	3	0
SDT	3064	Pavir.Ea03024.1	Pavir.Ea03024.1.p|PACid:30231561	30231561	Pavir.Ea03024.1.p|PACid:30231561	2.2242	4.67251728199207	0.0005	2	Abiotic/biotic stress	AT4G11650.1	osmotin 34								Unclassified	11	39
SDT	409	Pavir.Aa00282.1	Pavir.Aa00282.1.p|PACid:30253178	30253178	Pavir.Aa00282.1.p|PACid:30253178	2.2363	4.71187086251558	<.0001	20	Abiotic/biotic stress	AT1G54050.1	HSP20-like chaperones superfamily protein
SDT	5617	Pavir.J34849.1	Pavir.J34849.1.p|PACid:30255001	30255001	Pavir.J34849.1.p|PACid:30255001	2.2484	4.75155589270669	<.0001	3	Abiotic/biotic stress	AT3G04720.1	pathogenesis-related 4
SDT	647	Pavir.Ea00606.1	Pavir.Ea00606.1.p|PACid:30226304	30226304	Pavir.Ea00606.1.p|PACid:30226304	2.4427	5.4365823445606	<.0001	16	Abiotic/biotic stress	AT5G59720.1	heat shock protein 18.2
SDT	2853	Pavir.Ga02283.1	Pavir.Ga02283.1.p|PACid:30306035	30306035	Pavir.Ga02283.1.p|PACid:30306035	2.4805	5.5809085257746	<.0001	15	Abiotic/biotic stress	AT5G24090.1	chitinase A
SDT	1459	Pavir.Eb03806.1	Pavir.Eb03806.1.p|PACid:30312699	30312699	Pavir.Eb03806.1.p|PACid:30312699	2.6624	6.33085345146004	<.0001	12	Abiotic/biotic stress	AT4G11650.1	osmotin 34
SDT	5852	Pavir.J36772.1	Pavir.J36772.1.p|PACid:30203019	30203019	Pavir.J36772.1.p|PACid:30203019	2.699	6.49351664781823	<.0001	8	Abiotic/biotic stress	AT3G04720.1	pathogenesis-related 4
SDT	972	Pavir.J34564.1	Pavir.J34564.1.p|PACid:30263851	30263851	Pavir.J34564.1.p|PACid:30263851	2.7062	6.52600458034124	<.0001	12	Abiotic/biotic stress	AT3G12500.1	basic chitinase
SDT	3475	Pavir.Cb00662.1	Pavir.Cb00662.1.p|PACid:30269981	30269981	Pavir.Cb00662.1.p|PACid:30269981	2.8857	7.39064357864723	<.0001	4	Abiotic/biotic stress	AT5G66400.1	Dehydrin family protein
SDT	2125	Pavir.Ib00193.1	Pavir.Ib00193.1.p|PACid:30238328	30238328	Pavir.Ib00193.1.p|PACid:30238328	2.9433	7.69168670210978	<.0001	12	Abiotic/biotic stress	AT3G12500.1	basic chitinase
SDT	2211	Pavir.J09458.1	Pavir.J09458.1.p|PACid:30231778	30231778	Pavir.J09458.1.p|PACid:30231778	2.9654	7.81041929407945	<.0001	4	Abiotic/biotic stress	AT3G54420.1	homolog of carrot EP3-3 chitinase
SDT	4134	Pavir.J38392.1	Pavir.J38392.1.p|PACid:30207790	30207790	Pavir.J38392.1.p|PACid:30207790	2.9662	7.81475151120422	<.0001	4	Abiotic/biotic stress	AT2G14610.1	pathogenesis-related gene 1
SDT	3436	Pavir.Ab00731.1	Pavir.Ab00731.1.p|PACid:30236320	30236320	Pavir.Ab00731.1.p|PACid:30236320	3.0026	8.01443046061298	<.0001	5	Abiotic/biotic stress	AT1G52560.1	HSP20-like chaperones superfamily protein
SDT	2854	Pavir.J17463.1	Pavir.J17463.1.p|PACid:30282282	30282282	Pavir.J17463.1.p|PACid:30282282	3.6669	12.7012624799662	<.0001	3	Abiotic/biotic stress	AT3G54420.1	homolog of carrot EP3-3 chitinase
SDT	366	Pavir.Fb00620.1	Pavir.Fb00620.1.p|PACid:30278273	30278273	Pavir.Fb00620.1.p|PACid:30278273	1.42039	2.6765785643083	<.0001	43	Amino acid metabolism	AT1G11840.6	glyoxalase I homolog
SDT	2586	Pavir.J03454.1	Pavir.J03454.1.p|PACid:30200965	30200965	Pavir.J03454.1.p|PACid:30200965	1.4886	2.80616530998062	<.0001	3	Amino acid metabolism	AT3G45300.1	isovaleryl-CoA-dehydrogenase
SDT	6575	Pavir.Db00968.1	Pavir.Db00968.1.p|PACid:30261483	30261483	Pavir.Db00968.1.p|PACid:30261483	1.4909	2.81064257476375	<.0001	2	Amino acid metabolism	AT3G60880.1	dihydrodipicolinate synthase 1
SDT	5460	Pavir.J17816.1	Pavir.J17816.1.p|PACid:30285619	30285619	Pavir.J17816.1.p|PACid:30285619	1.5026	2.83352906302373	<.0001	7	Amino acid metabolism	AT4G33150.1	lysine-ketoglutarate reductase/saccharopine dehydrogenase bifunctional enzyme
SDT	4194	Pavir.Db00371.1	Pavir.Db00371.1.p|PACid:30262621	30262621	Pavir.Db00371.1.p|PACid:30262621	1.5206	2.86910347453202	<.0001	6	Amino acid metabolism	AT4G20930.1	6-phosphogluconate dehydrogenase family protein
SDT	4823	Pavir.Cb00192.1	Pavir.Cb00192.1.p|PACid:30269989	30269989	Pavir.Cb00192.1.p|PACid:30269989	1.5323	2.892465997955	<.0001	3	Amino acid metabolism	AT1G03090.2	methylcrotonyl-CoA carboxylase alpha chain, mitochondrial / 3-methylcrotonyl-CoA carboxylase 1 (MCCA)
SDT	3703	Pavir.Da02439.1	Pavir.Da02439.1.p|PACid:30193736	30193736	Pavir.Da02439.1.p|PACid:30193736	1.7172	3.28797652791851	<.0001	8	Amino acid metabolism	AT5G54080.1	homogentisate 1,2-dioxygenase
SDT	1322	Pavir.Fa00915.1	Pavir.Fa00915.1.p|PACid:30186533	30186533	Pavir.Fa00915.1.p|PACid:30186533	2.4586	5.49683052595865	<.0001	4	Amino acid metabolism	AT5G17330.1	glutamate decarboxylase
SDT	4224	Pavir.Cb01993.1	Pavir.Cb01993.1.p|PACid:30269373	30269373	Pavir.Cb01993.1.p|PACid:30269373	1.506	2.84021471708685	<.0001	8	Calvin cycle	AT4G38970.1	fructose-bisphosphate aldolase 2
SDT	5820	Pavir.J01039.1	Pavir.J01039.1.p|PACid:30272594	30272594	Pavir.J01039.1.p|PACid:30272594	1.39906	2.63729690879899	<.0001	3	Cell organization	AT5G02130.1	Tetratricopeptide repeat (TPR)-like superfamily protein
SDT	4068	Pavir.Bb01893.1	Pavir.Bb01893.1.p|PACid:30297522	30297522	Pavir.Bb01893.1.p|PACid:30297522	1.64084	3.11847350148817	<.0001	9	Cell organization	AT1G68090.1	annexin 5
SDT	283	Pavir.J00639.1	Pavir.J00639.1.p|PACid:30255563	30255563	Pavir.J00639.1.p|PACid:30255563	1.7793	3.43259583574353	<.0001	16	Cell organization	AT5G09810.1	actin 7
SDT	766	Pavir.J00892.1	Pavir.J00892.1.p|PACid:30275043	30275043	Pavir.J00892.1.p|PACid:30275043	2.5075	5.68633856603495	<.0001	25	Cell organization	AT1G01750.1	actin depolymerizing factor 11
SDT	1249	Pavir.J16347.1	Pavir.J16347.1.p|PACid:30307684	30307684	Pavir.J16347.1.p|PACid:30307684	2.5751	5.95912289309894	<.0001	18	Cell organization	AT1G01750.1	actin depolymerizing factor 11
SDT	5261	Pavir.Aa00841.1	Pavir.Aa00841.1.p|PACid:30252973	30252973	Pavir.Aa00841.1.p|PACid:30252973	1.4799	2.78929398687376	<.0001	2	Cell wall synthesis / modification	AT2G45110.1	expansin B4
SDT	6206	Pavir.Ib01492.1	Pavir.Ib01492.1.p|PACid:30242719	30242719	Pavir.Ib01492.1.p|PACid:30242719	1.5041	2.83647667412604	<.0001	3	Cell wall synthesis / modification	AT3G10740.1	alpha-L-arabinofuranosidase 1
SDT	2887	Pavir.Cb02121.1	Pavir.Cb02121.1.p|PACid:30267871	30267871	Pavir.Cb02121.1.p|PACid:30267871	2.4814	5.58439116386165	<.0001	6	Cell wall synthesis / modification	AT3G10740.1	alpha-L-arabinofuranosidase 1
SDT	4949	Pavir.Aa03261.1	Pavir.Aa03261.1.p|PACid:30252981	30252981	Pavir.Aa03261.1.p|PACid:30252981	-1.9588	0.257242335861616	<.0001	2	Development	AT5G66170.3	sulfurtransferase 18
SDT	4793	Pavir.Fb01946.1	Pavir.Fb01946.1.p|PACid:30281080	30281080	Pavir.Fb01946.1.p|PACid:30281080	-1.4887	0.356333493300529	<.0001	3	Development	AT2G42200.1	squamosa promoter binding protein-like 9
SDT	289	Pavir.J19600.1	Pavir.J19600.1.p|PACid:30274742	30274742	Pavir.J19600.1.p|PACid:30274742	1.5578	2.94404556466902	<.0001	26	Development	AT3G22490.1	Seed maturation protein
SDT	4102	Pavir.Ea00389.1	Pavir.Ea00389.1.p|PACid:30228609	30228609	Pavir.Ea00389.1.p|PACid:30228609	1.55908	2.94665876455988	<.0001	5	Development	AT5G62200.1	Embryo-specific protein 3, (ATS3)
SDT	4387	Pavir.J19751.1	Pavir.J19751.1.p|PACid:30274240	30274240	Pavir.J19751.1.p|PACid:30274240	1.6048	3.04153583085722	<.0001	4	Development	AT1G28330.1	dormancy-associated protein-like 1
SDT	3218	Pavir.Ia02723.1	Pavir.Ia02723.1.p|PACid:30214198	30214198	Pavir.Ia02723.1.p|PACid:30214198	1.7537	3.37222313399937	<.0001	7	Development	AT2G03440.1	nodulin-related protein 1
SDT	2489	Pavir.Eb02512.1	Pavir.Eb02512.1.p|PACid:30308767	30308767	Pavir.Eb02512.1.p|PACid:30308767	1.7697	3.40983043903837	<.0001	10	Development	AT1G01470.1	Late embryogenesis abundant protein
SDT	1131	Pavir.Fb01280.1	Pavir.Fb01280.1.p|PACid:30278487	30278487	Pavir.Fb01280.1.p|PACid:30278487	1.9441	3.84797653082377	<.0001	20	Development	AT5G06760.1	Late Embryogenesis Abundant 4-5
SDT	5718	Pavir.Bb03722.1	Pavir.Bb03722.1.p|PACid:30296861	30296861	Pavir.Bb03722.1.p|PACid:30296861	1.9467	3.85491754004474	<.0001	3	Development	AT2G36640.1	embryonic cell protein 63
SDT	2524	Pavir.Bb02409.1	Pavir.Bb02409.1.p|PACid:30298298	30298298	Pavir.Bb02409.1.p|PACid:30298298	2.131	4.3802098831743	<.0001	10	Development	AT2G33690.1	Late embryogenesis abundant protein, group 6
SDT	2763	Pavir.Ea00105.1	Pavir.Ea00105.1.p|PACid:30227246	30227246	Pavir.Ea00105.1.p|PACid:30227246	2.1927	4.57160260477264	<.0001	3	Development	AT1G01470.1	Late embryogenesis abundant protein
SDT	1102	Pavir.Ca01850.1	Pavir.Ca01850.1.p|PACid:30203800	30203800	Pavir.Ca01850.1.p|PACid:30203800	2.2	4.59479341998814	<.0001	10	Development	AT1G52690.1	Late embryogenesis abundant protein (LEA) family protein
SDT	4513	Pavir.Eb00493.1	Pavir.Eb00493.1.p|PACid:30309898	30309898	Pavir.Eb00493.1.p|PACid:30309898	2.3786	5.20031855183786	<.0001	6	Development	AT3G51810.1	Stress induced protein
SDT	3543	Pavir.Ca01448.1	Pavir.Ca01448.1.p|PACid:30204925	30204925	Pavir.Ca01448.1.p|PACid:30204925	2.5053	5.67767394116187	<.0001	3	Development	AT3G51810.1	Stress induced protein
SDT	3637	Pavir.J00999.1	Pavir.J00999.1.p|PACid:30308562	30308562	Pavir.J00999.1.p|PACid:30308562	2.6013	6.06833192445643	<.0001	10	Development	AT2G36640.1	embryonic cell protein 63
SDT	253	Pavir.Ca01780.1	Pavir.Ca01780.1.p|PACid:30206225	30206225	Pavir.Ca01780.1.p|PACid:30206225	2.9387	7.66720099253925	<.0001	44	Development	AT3G15670.1	Late embryogenesis abundant protein (LEA) family protein
SDT	1809	Pavir.Ia03678.1	Pavir.Ia03678.1.p|PACid:30215378	30215378	Pavir.Ia03678.1.p|PACid:30215378	3.1184	8.68424242455642	<.0001	17	Development	AT3G53040.1	late embryogenesis abundant protein, putative / LEA protein, putative
SDT	233	Pavir.J00158.1	Pavir.J00158.1.p|PACid:30282759	30282759	Pavir.J00158.1.p|PACid:30282759	3.32451	10.0179124261115	<.0001	70	Development	AT3G15670.1	Late embryogenesis abundant protein (LEA) family protein
SDT	5659	Pavir.Ga01132.1	Pavir.Ga01132.1.p|PACid:30306045	30306045	Pavir.Ga01132.1.p|PACid:30306045	3.4579	10.9883281881692	<.0001	4	Development	AT2G35300.1	Late embryogenesis abundant protein, group 1 protein
SDT	2262	Pavir.J24821.1	Pavir.J24821.1.p|PACid:30277014	30277014	Pavir.J24821.1.p|PACid:30277014	3.4782	11.1440366297875	<.0001	11	Development	AT1G52690.1	Late embryogenesis abundant protein (LEA) family protein
SDT	5963	Pavir.Ga01295.1	Pavir.Ga01295.1.p|PACid:30303990	30303990	Pavir.Ga01295.1.p|PACid:30303990	3.6127	12.2329461889146	<.0001	2	Development	AT4G26740.1	seed gene 1
SDT	2122	Pavir.Fb00948.1	Pavir.Fb00948.1.p|PACid:30279736	30279736	Pavir.Fb00948.1.p|PACid:30279736	3.8862	14.7864108488703	<.0001	6	Development	AT3G22490.1	Seed maturation protein
SDT	2308	Pavir.Aa01553.1	Pavir.Aa01553.1.p|PACid:30251686	30251686	Pavir.Aa01553.1.p|PACid:30251686	-2.0189	0.246746239024714	<.0001	8	DNA synthesis	AT1G18800.1	NAP1-related protein 2
SDT	2378	Pavir.Fb02055.1	Pavir.Fb02055.1.p|PACid:30278309	30278309	Pavir.Fb02055.1.p|PACid:30278309	1.6856	3.21674148999903	0.0002	2	DNA synthesis	AT5G59910.1	Histone superfamily protein
SDT	3184	Pavir.Db02350.1	Pavir.Db02350.1.p|PACid:30262521	30262521	Pavir.Db02350.1.p|PACid:30262521	2.0089	4.02475230975079	<.0001	9	DNA synthesis	AT2G18050.1	histone H1-3
SDT	3469	Pavir.J05562.1	Pavir.J05562.1.p|PACid:30267394	30267394	Pavir.J05562.1.p|PACid:30267394	2.2103	4.62771494184442	<.0001	18	DNA synthesis	AT2G18050.1	histone H1-3
SDT	318	Pavir.Db01451.1	Pavir.Db01451.1.p|PACid:30260620	30260620	Pavir.Db01451.1.p|PACid:30260620	1.51884	2.8656054773055	<.0001	22	Fermentation	AT1G23800.1	aldehyde dehydrogenase 2B7
SDT	477	Pavir.Da01650.1	Pavir.Da01650.1.p|PACid:30193562	30193562	Pavir.Da01650.1.p|PACid:30193562	1.6251	3.08463545404274	<.0001	9	Fermentation	AT1G23800.1	aldehyde dehydrogenase 2B7
SDT	1636	Pavir.Ea01601.1	Pavir.Ea01601.1.p|PACid:30230143	30230143	Pavir.Ea01601.1.p|PACid:30230143	1.396	2.63170905005802	<.0001	10	Fermentation	AT3G24503.1	aldehyde dehydrogenase 2C4
SDT	3932	Pavir.Ia03296.1	Pavir.Ia03296.1.p|PACid:30210796	30210796	Pavir.Ia03296.1.p|PACid:30210796	-1.9987	0.250225374359874	<.0001	2	Functional enzyme	AT5G42180.1	Peroxidase superfamily protein
SDT	2931	Pavir.Fa01764.1	Pavir.Fa01764.1.p|PACid:30187362	30187362	Pavir.Fa01764.1.p|PACid:30187362	1.397	2.63353384411849	<.0001	8	Functional enzyme	AT5G58090.1	O-Glycosyl hydrolases family 17 protein
SDT	3312	Pavir.J30882.1	Pavir.J30882.1.p|PACid:30190313	30190313	Pavir.J30882.1.p|PACid:30190313	1.4288	2.69222689078684	<.0001	2	Functional enzyme	AT4G13180.1	NAD(P)-binding Rossmann-fold superfamily protein
SDT	4011	Pavir.J08895.1	Pavir.J08895.1.p|PACid:30257540	30257540	Pavir.J08895.1.p|PACid:30257540	1.4495	2.73113381061688	<.0001	8	Functional enzyme	AT3G03080.1	Zinc-binding dehydrogenase family protein
SDT	1220	Pavir.Ga00910.1	Pavir.Ga00910.1.p|PACid:30305132	30305132	Pavir.Ga00910.1.p|PACid:30305132	1.4683	2.76695657064711	<.0001	9	Functional enzyme	AT5G38010.1	UDP-Glycosyltransferase superfamily protein
SDT	560	Pavir.J33952.1	Pavir.J33952.1.p|PACid:30281345	30281345	Pavir.J33952.1.p|PACid:30281345	1.4756	2.7809927815969	<.0001	4	Functional enzyme	AT2G32520.1	alpha/beta-Hydrolases superfamily protein
SDT	1024	Pavir.Ea01261.1	Pavir.Ea01261.1.p|PACid:30231507	30231507	Pavir.Ea01261.1.p|PACid:30231507	1.4999	2.82823107991197	<.0001	16	Functional enzyme	AT1G71695.1	Peroxidase superfamily protein
SDT	3227	Pavir.Bb02402.1	Pavir.Bb02402.1.p|PACid:30297818	30297818	Pavir.Bb02402.1.p|PACid:30297818	1.51562	2.85921676747656	<.0001	8	Functional enzyme	AT2G22420.1	Peroxidase superfamily protein
SDT	5251	Pavir.J08343.1	Pavir.J08343.1.p|PACid:30273449	30273449	Pavir.J08343.1.p|PACid:30273449	1.5551	2.93854094363463	<.0001	5	Functional enzyme	AT5G05960.1	Bifunctional inhibitor/lipid-transfer protein/seed storage 2S albumin superfamily protein
SDT	5500	Pavir.J32739.1	Pavir.J32739.1.p|PACid:30197342	30197342	Pavir.J32739.1.p|PACid:30197342	1.5797	2.9890768715786	<.0001	3	Functional enzyme	AT3G57260.1	beta-1,3-glucanase 2
SDT	1302	Pavir.J02614.1	Pavir.J02614.1.p|PACid:30306905	30306905	Pavir.J02614.1.p|PACid:30306905	1.60967	3.0518202690744	<.0001	36	Functional enzyme	AT1G17180.1	glutathione S-transferase TAU 25
SDT	4366	Pavir.Ib00352.1	Pavir.Ib00352.1.p|PACid:30239823	30239823	Pavir.Ib00352.1.p|PACid:30239823	1.6418	3.12054929071935	<.0001	5	Functional enzyme	AT2G47730.1	glutathione S-transferase phi 8
SDT	2702	Pavir.Aa02378.1	Pavir.Aa02378.1.p|PACid:30253859	30253859	Pavir.Aa02378.1.p|PACid:30253859	1.6689	3.17972059472067	<.0001	4	Functional enzyme	AT2G29420.1	glutathione S-transferase tau 7
SDT	4877	Pavir.Bb00661.1	Pavir.Bb00661.1.p|PACid:30300127	30300127	Pavir.Bb00661.1.p|PACid:30300127	1.6703	3.18280771246856	<.0001	4	Functional enzyme	N	N
SDT	3157	Pavir.Bb03524.1	Pavir.Bb03524.1.p|PACid:30297224	30297224	Pavir.Bb03524.1.p|PACid:30297224	1.7001	3.24923479741348	<.0001	7	Functional enzyme	AT4G03140.1	NAD(P)-binding Rossmann-fold superfamily protein
SDT	1528	Pavir.Ea02798.1	Pavir.Ea02798.1.p|PACid:30227120	30227120	Pavir.Ea02798.1.p|PACid:30227120	1.70434	3.25879816288848	<.0001	21	Functional enzyme	AT3G62760.1	Glutathione S-transferase family protein
SDT	3581	Pavir.J02529.1	Pavir.J02529.1.p|PACid:30225526	30225526	Pavir.J02529.1.p|PACid:30225526	1.7085	3.26820844291904	<.0001	8	Functional enzyme	AT1G54870.1	NAD(P)-binding Rossmann-fold superfamily protein
SDT	2142	Pavir.Ca00811.1	Pavir.Ca00811.1.p|PACid:30204135	30204135	Pavir.Ca00811.1.p|PACid:30204135	1.7434	3.34823316940445	<.0001	8	Functional enzyme	AT4G25150.1	HAD superfamily, subfamily IIIB acid phosphatase
SDT	1846	Pavir.Ca00381.1	Pavir.Ca00381.1.p|PACid:30203810	30203810	Pavir.Ca00381.1.p|PACid:30203810	1.7491	3.3614880014512	<.0001	13	Functional enzyme	AT5G16970.1	alkenal reductase
SDT	2040	Pavir.Cb00980.1	Pavir.Cb00980.1.p|PACid:30269537	30269537	Pavir.Cb00980.1.p|PACid:30269537	1.7572	3.38041413007363	<.0001	5	Functional enzyme	AT2G32810.1	beta galactosidase 9
SDT	5598	Pavir.Ca01835.1	Pavir.Ca01835.1.p|PACid:30203135	30203135	Pavir.Ca01835.1.p|PACid:30203135	1.7606	3.38839014830428	<.0001	8	Functional enzyme	AT3G18280.1	Bifunctional inhibitor/lipid-transfer protein/seed storage 2S albumin superfamily protein
SDT	1786	Pavir.J03245.1	Pavir.J03245.1.p|PACid:30195944	30195944	Pavir.J03245.1.p|PACid:30195944	1.7652	3.39921119462402	<.0001	2	Functional enzyme	AT1G13750.1	Purple acid phosphatases superfamily protein
SDT	3558	Pavir.Fb00271.1	Pavir.Fb00271.1.p|PACid:30281008	30281008	Pavir.Fb00271.1.p|PACid:30281008	1.7768	3.42665275120719	0.0006	2	Functional enzyme	AT3G02100.1	UDP-Glycosyltransferase superfamily protein
SDT	7456	Pavir.Bb00378.1	Pavir.Bb00378.1.p|PACid:30299926	30299926	Pavir.Bb00378.1.p|PACid:30299926	1.7818	3.43854922778878	<.0001	2	Functional enzyme	AT3G03980.1	NAD(P)-binding Rossmann-fold superfamily protein
SDT	6625	Pavir.Ba01974.1	Pavir.Ba01974.1.p|PACid:30289794	30289794	Pavir.Ba01974.1.p|PACid:30289794	1.8237	3.5398788846588	0.0004	2	Functional enzyme	AT2G29420.1	glutathione S-transferase tau 7
SDT	3597	Pavir.Ha01276.1	Pavir.Ha01276.1.p|PACid:30316445	30316445	Pavir.Ha01276.1.p|PACid:30316445	1.8783	3.67641594363995	<.0001	5	Functional enzyme	AT4G35150.1	O-methyltransferase family protein
SDT	3498	Pavir.Gb01868.1	Pavir.Gb01868.1.p|PACid:30222408	30222408	Pavir.Gb01868.1.p|PACid:30222408	1.8785	3.67692563843766	<.0001	9	Functional enzyme	AT5G05960.1	Bifunctional inhibitor/lipid-transfer protein/seed storage 2S albumin superfamily protein
SDT	4339	Pavir.Ia00797.1	Pavir.Ia00797.1.p|PACid:30210919	30210919	Pavir.Ia00797.1.p|PACid:30210919	1.8919	3.71123665364726	<.0001	5	Functional enzyme	AT2G02850.1	plantacyanin
SDT	6147	Pavir.Eb03999.1	Pavir.Eb03999.1.p|PACid:30313144	30313144	Pavir.Eb03999.1.p|PACid:30313144	1.8941	3.71690032397288	<.0001	2	Functional enzyme	AT1G71695.1	Peroxidase superfamily protein
SDT	2274	Pavir.Ca02020.1	Pavir.Ca02020.1.p|PACid:30206257	30206257	Pavir.Ca02020.1.p|PACid:30206257	2.0153	4.04264634322398	<.0001	3	Functional enzyme	AT2G32810.1	beta galactosidase 9
SDT	6161	Pavir.Eb02854.1	Pavir.Eb02854.1.p|PACid:30311461	30311461	Pavir.Eb02854.1.p|PACid:30311461	2.0383	4.10761224803256	<.0001	2	Functional enzyme	AT1G10360.1	glutathione S-transferase TAU 18
SDT	4738	Pavir.Ea03391.1	Pavir.Ea03391.1.p|PACid:30231527	30231527	Pavir.Ea03391.1.p|PACid:30231527	2.1069	4.30764691109272	<.0001	4	Functional enzyme	AT5G05960.1	Bifunctional inhibitor/lipid-transfer protein/seed storage 2S albumin superfamily protein
SDT	5131	Pavir.Ia02811.1	Pavir.Ia02811.1.p|PACid:30212405	30212405	Pavir.Ia02811.1.p|PACid:30212405	2.1502	4.43889320688199	<.0001	2	Functional enzyme	AT5G06720.1	peroxidase 2
SDT	7055	Pavir.Aa02058.1	Pavir.Aa02058.1.p|PACid:30253206	30253206	Pavir.Aa02058.1.p|PACid:30253206	2.2585	4.78493723264648	0.0014	2	Functional enzyme	AT2G45550.1	cytochrome P450, family 76, subfamily C, polypeptide 4
SDT	2084	Pavir.J24327.1	Pavir.J24327.1.p|PACid:30256877	30256877	Pavir.J24327.1.p|PACid:30256877	2.2816	4.86216886637517	<.0001	10	Functional enzyme	AT1G10370.1	Glutathione S-transferase family protein
SDT	3593	Pavir.J00683.1	Pavir.J00683.1.p|PACid:30255035	30255035	Pavir.J00683.1.p|PACid:30255035	2.3497	5.09718246976904	<.0001	9	Functional enzyme	AT5G05960.1	Bifunctional inhibitor/lipid-transfer protein/seed storage 2S albumin superfamily protein
SDT	7387	Pavir.Aa01798.1	Pavir.Aa01798.1.p|PACid:30252817	30252817	Pavir.Aa01798.1.p|PACid:30252817	2.4131	5.32617562251248	<.0001	3	Functional enzyme	N	N
SDT	3076	Pavir.J15786.1	Pavir.J15786.1.p|PACid:30195529	30195529	Pavir.J15786.1.p|PACid:30195529	2.5828	5.99101314935143	<.0001	9	Functional enzyme	AT1G71695.1	Peroxidase superfamily protein
SDT	5594	Pavir.Ea02497.1	Pavir.Ea02497.1.p|PACid:30228113	30228113	Pavir.Ea02497.1.p|PACid:30228113	2.6257	6.17183716932915	<.0001	2	Functional enzyme	AT1G10360.1	glutathione S-transferase TAU 18
SDT	508	Pavir.Ib01540.1	Pavir.Ib01540.1.p|PACid:30237822	30237822	Pavir.Ib01540.1.p|PACid:30237822	1.7112	3.27433061350802	<.0001	21	Glycolysis	AT3G08590.1	Phosphoglycerate mutase, 2,3-bisphosphoglycerate-independent
SDT	3840	Pavir.J15479.1	Pavir.J15479.1.p|PACid:30208673	30208673	Pavir.J15479.1.p|PACid:30208673	2.288	4.88378605067654	<.0001	8	Glycolysis	AT5G47810.1	phosphofructokinase 2
SDT	41	Pavir.J02207.1	Pavir.J02207.1.p|PACid:30225449	30225449	Pavir.J02207.1.p|PACid:30225449	-1.73864	0.299652019069238	<.0001	51	Glyoxylate cycle	AT4G15530.1	pyruvate orthophosphate dikinase
SDT	5029	Pavir.Ia00082.1	Pavir.Ia00082.1.p|PACid:30209288	30209288	Pavir.Ia00082.1.p|PACid:30209288	-2.6418	0.160228201325652	<.0001	2	Lipids metabolism	AT5G27200.1	acyl carrier protein 5
SDT	3230	Pavir.Bb02686.1	Pavir.Bb02686.1.p|PACid:30297191	30297191	Pavir.Bb02686.1.p|PACid:30297191	-2.0291	0.245007870595408	<.0001	5	Lipids metabolism	AT1G54580.1	acyl carrier protein 2
SDT	3371	Pavir.J01373.1	Pavir.J01373.1.p|PACid:30219389	30219389	Pavir.J01373.1.p|PACid:30219389	-1.7776	0.291668198833396	<.0001	4	Lipids metabolism	AT1G54580.1	acyl carrier protein 2
SDT	2872	Pavir.Cb00901.1	Pavir.Cb00901.1.p|PACid:30269979	30269979	Pavir.Cb00901.1.p|PACid:30269979	-1.7659	0.294043193387434	<.0001	8	Lipids metabolism	AT4G25050.1	acyl carrier protein 4
SDT	2963	Pavir.Fb02310.1	Pavir.Fb02310.1.p|PACid:30278297	30278297	Pavir.Fb02310.1.p|PACid:30278297	-1.6479	0.319104310065966	<.0001	9	Lipids metabolism	AT1G54580.1	acyl carrier protein 2
SDT	4064	Pavir.Ea02794.1	Pavir.Ea02794.1.p|PACid:30228412	30228412	Pavir.Ea02794.1.p|PACid:30228412	1.4163	2.66900128486936	0.0022	2	Lipids metabolism	AT5G08030.1	PLC-like phosphodiesterases superfamily protein
SDT	4991	Pavir.Ab02053.1	Pavir.Ab02053.1.p|PACid:30235451	30235451	Pavir.Ab02053.1.p|PACid:30235451	2.1724	4.50772654792404	<.0001	4	Lipids metabolism	AT1G47480.1	alpha/beta-Hydrolases superfamily protein
SDT	5014	Pavir.Aa01512.1	Pavir.Aa01512.1.p|PACid:30252328	30252328	Pavir.Aa01512.1.p|PACid:30252328	2.2825	4.86520299144665	<.0001	2	Lipids metabolism	AT1G47480.1	alpha/beta-Hydrolases superfamily protein
SDT	2821	Pavir.J09198.1	Pavir.J09198.1.p|PACid:30218083	30218083	Pavir.J09198.1.p|PACid:30218083	1.7623	3.39238521186649	0.0001	3	Major CHO metabolism	AT1G27680.1	ADPGLC-PPase large subunit
SDT	6591	Pavir.J01866.1	Pavir.J01866.1.p|PACid:30284124	30284124	Pavir.J01866.1.p|PACid:30284124	1.8671	3.64798551240311	<.0001	3	Major CHO metabolism	AT1G73370.1	sucrose synthase 6
SDT	2682	Pavir.J01199.1	Pavir.J01199.1.p|PACid:30263609	30263609	Pavir.J01199.1.p|PACid:30263609	1.9177	3.77820242718897	<.0001	12	Major CHO metabolism	AT5G03650.1	starch branching enzyme 2.2
SDT	4585	Pavir.Ea01371.1	Pavir.Ea01371.1.p|PACid:30230510	30230510	Pavir.Ea01371.1.p|PACid:30230510	4.2187	18.6189524455396	<.0001	3	Metal binding	AT1G71050.1	Heavy metal transport/detoxification superfamily protein
SDT	3712	Pavir.Ea00501.1	Pavir.Ea00501.1.p|PACid:30230246	30230246	Pavir.Ea00501.1.p|PACid:30230246	1.9039	3.74223459040002	<.0001	5	Metal binding	AT3G09390.1	metallothionein 2A
SDT	2747	Pavir.J34655.1	Pavir.J34655.1.p|PACid:30270543	30270543	Pavir.J34655.1.p|PACid:30270543	1.6803	3.20494589083355	<.0001	4	Minor CHO metabolism	AT2G37770.2	NAD(P)-linked oxidoreductase superfamily protein
SDT	3318	Pavir.J15860.1	Pavir.J15860.1.p|PACid:30275456	30275456	Pavir.J15860.1.p|PACid:30275456	1.9625	3.89736756480683	<.0001	10	Minor CHO metabolism	AT2G37770.2	NAD(P)-linked oxidoreductase superfamily protein
SDT	7232	Pavir.J40731.1	Pavir.J40731.1.p|PACid:30255060	30255060	Pavir.J40731.1.p|PACid:30255060	2.0647	4.18346974063891	<.0001	4	Minor CHO metabolism	AT2G47180.1	galactinol synthase 1
SDT	906	Pavir.Ga01171.1	Pavir.Ga01171.1.p|PACid:30305338	30305338	Pavir.Ga01171.1.p|PACid:30305338	1.43439	2.70267867842978	<.0001	17	Nucleotide metabolism	AT5G03300.1	adenosine kinase 2
SDT	4588	Pavir.Da00480.1	Pavir.Da00480.1.p|PACid:30192989	30192989	Pavir.Da00480.1.p|PACid:30192989	1.46981	2.76985412805004	<.0001	3	Nucleotide metabolism	AT5G47650.1	nudix hydrolase homolog 2
SDT	5177	Pavir.J15793.1	Pavir.J15793.1.p|PACid:30248019	30248019	Pavir.J15793.1.p|PACid:30248019	1.9253	3.79815820648577	<.0001	5	Nucleotide metabolism	AT5G18280.1	apyrase 2
SDT	4196	Pavir.J10537.1	Pavir.J10537.1.p|PACid:30216759	30216759	Pavir.J10537.1.p|PACid:30216759	2.03356	4.09413876135954	<.0001	6	Nucleotide metabolism	AT3G04080.1	apyrase 1
SDT	3646	Pavir.Ia00209.1	Pavir.Ia00209.1.p|PACid:30210701	30210701	Pavir.Ia00209.1.p|PACid:30210701	-1.533	0.345558051632146	0.0041	3	Pentose phosphate pathway	AT2G27510.1	ferredoxin 3
SDT	1513	Pavir.Ib03775.1	Pavir.Ib03775.1.p|PACid:30239410	30239410	Pavir.Ib03775.1.p|PACid:30239410	1.56306	2.95479901124603	<.0001	26	Phyto-hormone metabolism	AT2G33830.2	Dormancy/auxin associated family protein
SDT	2247	Pavir.J37193.1	Pavir.J37193.1.p|PACid:30197386	30197386	Pavir.J37193.1.p|PACid:30197386	1.765	3.3987399965546	<.0001	9	Phyto-hormone metabolism	AT3G22400.1	PLAT/LH2 domain-containing lipoxygenase family protein
SDT	2393	Pavir.Ib04405.1	Pavir.Ib04405.1.p|PACid:30240108	30240108	Pavir.Ib04405.1.p|PACid:30240108	1.9012	3.73523755764715	<.0001	3	Phyto-hormone metabolism	AT1G55020.1	lipoxygenase 1
SDT	5900	Pavir.J06494.1	Pavir.J06494.1.p|PACid:30286195	30286195	Pavir.J06494.1.p|PACid:30286195	2.079	4.22514250140743	<.0001	3	Phyto-hormone metabolism	AT2G14900.1	Gibberellin-regulated family protein
SDT	132	Pavir.J00130.1	Pavir.J00130.1.p|PACid:30200135	30200135	Pavir.J00130.1.p|PACid:30200135	2.1083	4.31182910661423	<.0001	7	Phyto-hormone metabolism	AT1G60730.1	NAD(P)-linked oxidoreductase superfamily protein
SDT	888	Pavir.Ca02189.1	Pavir.Ca02189.1.p|PACid:30206971	30206971	Pavir.Ca02189.1.p|PACid:30206971	2.1253	4.36293808380869	<.0001	22	Phyto-hormone metabolism	AT5G13200.1	GRAM domain family protein
SDT	4760	Pavir.Ea00295.1	Pavir.Ea00295.1.p|PACid:30226575	30226575	Pavir.Ea00295.1.p|PACid:30226575	2.15212	4.44480460769889	<.0001	10	Phyto-hormone metabolism	AT1G03400.1	2-oxoglutarate (2OG) and Fe(II)-dependent oxygenase superfamily protein
SDT	1817	Pavir.J01160.1	Pavir.J01160.1.p|PACid:30306248	30306248	Pavir.J01160.1.p|PACid:30306248	2.605	6.08391501296404	<.0001	15	Phyto-hormone metabolism	AT3G22850.1	Aluminium induced protein with YGL and LRDR motifs
SDT	3228	Pavir.Ga01685.1	Pavir.Ga01685.1.p|PACid:30302824	30302824	Pavir.Ga01685.1.p|PACid:30302824	1.5723	2.97378428563008	<.0001	4	Protein degradation	AT2G03200.1	Eukaryotic aspartyl protease family protein
SDT	1363	Pavir.Db01460.1	Pavir.Db01460.1.p|PACid:30261745	30261745	Pavir.Db01460.1.p|PACid:30261745	1.6166	3.06651498298414	<.0001	4	Protein degradation	AT1G03230.1	Eukaryotic aspartyl protease family protein
SDT	2072	Pavir.Ia01519.1	Pavir.Ia01519.1.p|PACid:30215029	30215029	Pavir.Ia01519.1.p|PACid:30215029	1.6199	3.07353731382006	<.0001	3	Protein degradation	AT4G36195.1	Serine carboxypeptidase S28 family protein
SDT	6688	Pavir.Ca00347.1	Pavir.Ca00347.1.p|PACid:30205712	30205712	Pavir.Ca00347.1.p|PACid:30205712	1.8423	3.58581236947652	<.0001	2	Protein degradation	AT4G12910.1	serine carboxypeptidase-like 20
SDT	6191	Pavir.Ga02610.1	Pavir.Ga02610.1.p|PACid:30303668	30303668	Pavir.Ga02610.1.p|PACid:30303668	1.8599	3.62982501225132	<.0001	2	Protein degradation	AT4G12910.1	serine carboxypeptidase-like 20
SDT	839	Pavir.J36542.1	Pavir.J36542.1.p|PACid:30207798	30207798	Pavir.J36542.1.p|PACid:30207798	1.873	3.6629347456725	<.0001	6	Protein degradation	AT1G03230.1	Eukaryotic aspartyl protease family protein
SDT	1489	Pavir.Da00795.1	Pavir.Da00795.1.p|PACid:30194578	30194578	Pavir.Da00795.1.p|PACid:30194578	1.8792	3.67871012676981	<.0001	8	Protein degradation	AT1G03230.1	Eukaryotic aspartyl protease family protein
SDT	1542	Pavir.Ea00101.1	Pavir.Ea00101.1.p|PACid:30231090	30231090	Pavir.Ea00101.1.p|PACid:30231090	1.88202	3.68590784197321	<.0001	29	Protein degradation	AT1G64110.3	P-loop containing nucleoside triphosphate hydrolases superfamily protein
SDT	5491	Pavir.Eb03276.1	Pavir.Eb03276.1.p|PACid:30312971	30312971	Pavir.Eb03276.1.p|PACid:30312971	2.2288	4.68743927259092	<.0001	4	Protein degradation	AT5G65760.1	Serine carboxypeptidase S28 family protein
SDT	4779	Pavir.Bb01503.1	Pavir.Bb01503.1.p|PACid:30300143	30300143	Pavir.Bb01503.1.p|PACid:30300143	2.3145	4.97432234566379	<.0001	4	Protein degradation	AT2G22980.1	serine carboxypeptidase-like 13
SDT	6055	Pavir.Bb00974.1	Pavir.Bb00974.1.p|PACid:30298341	30298341	Pavir.Bb00974.1.p|PACid:30298341	2.761	6.77865947956895	<.0001	2	Protein degradation	AT1G20160.1	Subtilisin-like serine endopeptidase family protein
SDT	834	Pavir.Gb02161.1	Pavir.Gb02161.1.p|PACid:30221760	30221760	Pavir.Gb02161.1.p|PACid:30221760	3.443	10.8754259352539	<.0001	3	Protein degradation	AT1G03230.1	Eukaryotic aspartyl protease family protein
SDT	6494	Pavir.J21399.1	Pavir.J21399.1.p|PACid:30244292	30244292	Pavir.J21399.1.p|PACid:30244292	1.623	3.08014869694429	0.0001	2	Protein modification	AT5G07470.1	peptidemethionine sulfoxide reductase 3
SDT	1714	Pavir.J08185.1	Pavir.J08185.1.p|PACid:30185137	30185137	Pavir.J08185.1.p|PACid:30185137	2.42177	5.35828010396307	<.0001	18	Protein targeting & vesicle tansport	AT4G16160.2	Mitochondrial import inner membrane translocase subunit Tim17/Tim22/Tim23 family protein
SDT	1114	Pavir.J11658.1	Pavir.J11658.1.p|PACid:30207612	30207612	Pavir.J11658.1.p|PACid:30207612	3.1065	8.61290548664533	<.0001	11	Protein targeting & vesicle tansport	AT4G16160.2	Mitochondrial import inner membrane translocase subunit Tim17/Tim22/Tim23 family protein
SDT	1941	Pavir.Ia03535.1	Pavir.Ia03535.1.p|PACid:30211090	30211090	Pavir.Ia03535.1.p|PACid:30211090	3.4373	10.8325425621327	<.0001	4	Protein targeting & vesicle tansport	AT4G16160.2	Mitochondrial import inner membrane translocase subunit Tim17/Tim22/Tim23 family protein
SDT	1493	Pavir.J14586.1	Pavir.J14586.1.p|PACid:30254928	30254928	Pavir.J14586.1.p|PACid:30254928	1.5756	2.98059426282055	<.0001	2	Redox balance	AT1G20630.1	catalase 1
SDT	405	Pavir.Ba02621.1	Pavir.Ba02621.1.p|PACid:30291170	30291170	Pavir.Ba02621.1.p|PACid:30291170	1.55314	2.9345514451664	<.0001	40	Redox balance	AT3G52880.1	monodehydroascorbate reductase 1
SDT	5781	Pavir.Ab02318.1	Pavir.Ab02318.1.p|PACid:30235492	30235492	Pavir.Ab02318.1.p|PACid:30235492	1.7687	3.40746774362579	<.0001	3	Redox balance	AT5G40370.1	Glutaredoxin family protein
SDT	5262	Pavir.Ab02229.1	Pavir.Ab02229.1.p|PACid:30234080	30234080	Pavir.Ab02229.1.p|PACid:30234080	-2.2327	0.212760170010591	<.0001	4	Regulation of transcription	AT1G05805.1	basic helix-loop-helix (bHLH) DNA-binding superfamily protein
SDT	5780	Pavir.Gb01377.1	Pavir.Gb01377.1.p|PACid:30222166	30222166	Pavir.Gb01377.1.p|PACid:30222166	-1.7498	0.297342996385546	<.0001	3	Regulation of transcription	AT1G05805.1	basic helix-loop-helix (bHLH) DNA-binding superfamily protein
SDT	5607	Pavir.Ca00875.1	Pavir.Ca00875.1.p|PACid:30206961	30206961	Pavir.Ca00875.1.p|PACid:30206961	-1.6593	0.316592722979478	<.0001	4	Regulation of transcription	AT5G38110.1	anti- silencing function 1b
SDT	5859	Pavir.Ib01055.1	Pavir.Ib01055.1.p|PACid:30240574	30240574	Pavir.Ib01055.1.p|PACid:30240574	-1.5156	0.349750978804687	<.0001	6	Regulation of transcription	AT4G39250.1	RAD-like 1
SDT	7455	Pavir.Da01847.1	Pavir.Da01847.1.p|PACid:30194365	30194365	Pavir.Da01847.1.p|PACid:30194365	-1.5002	0.353504381083259	<.0001	4	Regulation of transcription	AT3G13960.1	growth-regulating factor 5
SDT	1796	Pavir.Gb00738.1	Pavir.Gb00738.1.p|PACid:30224391	30224391	Pavir.Gb00738.1.p|PACid:30224391	1.4787	2.78697488198077	<.0001	9	Regulation of transcription	AT3G61260.1	Remorin family protein
SDT	1246	Pavir.J08147.1	Pavir.J08147.1.p|PACid:30199544	30199544	Pavir.J08147.1.p|PACid:30199544	1.5485	2.92512849343101	<.0001	3	Regulation of transcription	AT5G10770.1	Eukaryotic aspartyl protease family protein
SDT	1697	Pavir.Ia04404.1	Pavir.Ia04404.1.p|PACid:30211920	30211920	Pavir.Ia04404.1.p|PACid:30211920	3.1152	8.6650015052213	<.0001	8	Regulation of transcription	AT5G42290.1	transcription activator-related
SDT	1947	Pavir.Ba01215.1	Pavir.Ba01215.1.p|PACid:30290531	30290531	Pavir.Ba01215.1.p|PACid:30290531	2.2955	4.90924102750527	<.0001	22	RNA processing	AT1G14220.1	Ribonuclease T2 family protein
SDT	4572	Pavir.Hb00045.1	Pavir.Hb00045.1.p|PACid:30266709	30266709	Pavir.Hb00045.1.p|PACid:30266709	1.4363	2.70625915436505	0.0083	2	RNA processing	AT3G55460.1	SC35-like splicing factor 30
SDT	2668	Pavir.J19814.1	Pavir.J19814.1.p|PACid:30244484	30244484	Pavir.J19814.1.p|PACid:30244484	1.4946	2.81786012524567	<.0001	10	RNA processing	AT3G55460.1	SC35-like splicing factor 30
SDT	1500	Pavir.Fb00323.1	Pavir.Fb00323.1.p|PACid:30279021	30279021	Pavir.Fb00323.1.p|PACid:30279021	1.4946	2.81786012524567	<.0001	17	Secondary metabolism	AT5G54160.1	O-methyltransferase 1
SDT	1328	Pavir.J35577.1	Pavir.J35577.1.p|PACid:30194880	30194880	Pavir.J35577.1.p|PACid:30194880	1.4975	2.82353007822175	<.0001	6	Secondary metabolism	AT5G54160.1	O-methyltransferase 1
SDT	2712	Pavir.Ia02970.1	Pavir.Ia02970.1.p|PACid:30212909	30212909	Pavir.Ia02970.1.p|PACid:30212909	1.4999	2.82823107991197	<.0001	14	Secondary metabolism	AT1G17020.1	senescence-related gene 1
SDT	884	Pavir.Fa01907.1	Pavir.Fa01907.1.p|PACid:30187176	30187176	Pavir.Fa01907.1.p|PACid:30187176	1.52995	2.88775830723424	<.0001	14	Secondary metabolism	AT5G54160.1	O-methyltransferase 1
SDT	5492	Pavir.Cb01083.1	Pavir.Cb01083.1.p|PACid:30268849	30268849	Pavir.Cb01083.1.p|PACid:30268849	1.5446	2.91723174795811	<.0001	4	Secondary metabolism	AT1G32100.1	pinoresinol reductase 1
SDT	4775	Pavir.Ea02629.1	Pavir.Ea02629.1.p|PACid:30228858	30228858	Pavir.Ea02629.1.p|PACid:30228858	1.5556	2.9395595408189	<.0001	6	Secondary metabolism	AT1G34060.1	Pyridoxal phosphate (PLP)-dependent transferases superfamily protein
SDT	594	Pavir.Eb00895.1	Pavir.Eb00895.1.p|PACid:30311995	30311995	Pavir.Eb00895.1.p|PACid:30311995	1.5872	3.004656358828	<.0001	10	Secondary metabolism	AT1G75280.1	NmrA-like negative transcriptional regulator family protein
SDT	4689	Pavir.Aa01510.1	Pavir.Aa01510.1.p|PACid:30250971	30250971	Pavir.Aa01510.1.p|PACid:30250971	1.601	3.03353509074888	<.0001	6	Secondary metabolism	AT5G13930.1	Chalcone and stilbene synthase family protein
SDT	6112	Pavir.Ca01941.1	Pavir.Ca01941.1.p|PACid:30204867	30204867	Pavir.Ca01941.1.p|PACid:30204867	1.6586	3.15710009143309	<.0001	3	Secondary metabolism	AT4G13660.1	pinoresinol reductase 2
SDT	3814	Pavir.Gb00413.1	Pavir.Gb00413.1.p|PACid:30223284	30223284	Pavir.Gb00413.1.p|PACid:30223284	1.7228	3.30076401927719	<.0001	6	Secondary metabolism	AT1G61720.1	NAD(P)-binding Rossmann-fold superfamily protein
SDT	6847	Pavir.Ea03286.1	Pavir.Ea03286.1.p|PACid:30226410	30226410	Pavir.Ea03286.1.p|PACid:30226410	1.7793	3.43259583574353	<.0001	2	Secondary metabolism	AT5G58490.1	NAD(P)-binding Rossmann-fold superfamily protein
SDT	5848	Pavir.Ga01678.1	Pavir.Ga01678.1.p|PACid:30303654	30303654	Pavir.Ga01678.1.p|PACid:30303654	1.9735	3.92719708237953	<.0001	2	Secondary metabolism	AT1G59960.1	NAD(P)-linked oxidoreductase superfamily protein
SDT	6118	Pavir.Bb01875.1	Pavir.Bb01875.1.p|PACid:30297231	30297231	Pavir.Bb01875.1.p|PACid:30297231	2.0636	4.18028122007486	<.0001	2	Secondary metabolism	AT4G37980.1	elicitor-activated gene 3-1
SDT	7627	Pavir.Db00148.1	Pavir.Db00148.1.p|PACid:30261912	30261912	Pavir.Db00148.1.p|PACid:30261912	2.2096	4.62547010519416	<.0001	2	Secondary metabolism	AT5G09360.1	laccase 14
SDT	1003	Pavir.J20077.2	Pavir.J20077.2.p|PACid:30315093	30315093	Pavir.J20077.2.p|PACid:30315093	-1.5441	0.34290955264491	<.0001	7	Signaling regulation	AT4G20260.1	plasma-membrane associated cation-binding protein 1
SDT	4795	Pavir.Ba00296.1	Pavir.Ba00296.1.p|PACid:30293679	30293679	Pavir.Ba00296.1.p|PACid:30293679	-1.5097	0.351184238051626	<.0001	7	Signaling regulation	AT2G27030.3	calmodulin 5
SDT	5470	Pavir.Bb03348.1	Pavir.Bb03348.1.p|PACid:30297629	30297629	Pavir.Bb03348.1.p|PACid:30297629	-1.4372	0.369283318808758	0.001	2	Signaling regulation	AT2G15760.1	Protein of unknown function (DUF1645)
SDT	4024	Pavir.Ib02894.1	Pavir.Ib02894.1.p|PACid:30237124	30237124	Pavir.Ib02894.1.p|PACid:30237124	1.461	2.75299120318139	0.0005	2	Signaling regulation	AT4G38810.2	Calcium-binding EF-hand family protein
SDT	4189	Pavir.Eb00944.1	Pavir.Eb00944.1.p|PACid:30309163	30309163	Pavir.Eb00944.1.p|PACid:30309163	1.5149	2.85779018569587	<.0001	5	Signaling regulation	AT4G15800.1	ralf-like 33
SDT	5516	Pavir.J13632.1	Pavir.J13632.1.p|PACid:30283757	30283757	Pavir.J13632.1.p|PACid:30283757	1.6097	3.05188373055267	0.0008	2	Signaling regulation	AT2G26730.1	Leucine-rich repeat protein kinase family protein
SDT	2867	Pavir.Ea00048.1	Pavir.Ea00048.1.p|PACid:30230356	30230356	Pavir.Ea00048.1.p|PACid:30230356	1.7193	3.29276602137408	<.0001	10	Signaling regulation	AT4G20260.5	plasma-membrane associated cation-binding protein 1
SDT	2790	Pavir.Fb01354.1	Pavir.Fb01354.1.p|PACid:30279620	30279620	Pavir.Fb01354.1.p|PACid:30279620	1.76235	3.39250278501612	<.0001	11	Signaling regulation	AT2G33380.1	Caleosin-related family protein
SDT	7495	Pavir.Ba00312.1	Pavir.Ba00312.1.p|PACid:30290372	30290372	Pavir.Ba00312.1.p|PACid:30290372	1.7651	3.39897558742407	<.0001	2	Signaling regulation	AT2G40116.1	Phosphoinositide-specific phospholipase C family protein
SDT	3556	Pavir.Eb00019.1	Pavir.Eb00019.1.p|PACid:30314169	30314169	Pavir.Eb00019.1.p|PACid:30314169	2.028	4.07839073199276	<.0001	5	Signaling regulation	AT4G20260.5	plasma-membrane associated cation-binding protein 1
SDT	5962	Pavir.Ea01561.1	Pavir.Ea01561.1.p|PACid:30227923	30227923	Pavir.Ea01561.1.p|PACid:30227923	4.0332	16.3724690645883	<.0001	4	Signaling regulation	AT4G23180.1	cysteine-rich RLK (RECEPTOR-like protein kinase) 10
SDT	1391	Pavir.Db01776.1	Pavir.Db01776.1.p|PACid:30261030	30261030	Pavir.Db01776.1.p|PACid:30261030	1.7571	3.38017982574175	<.0001	10	TCA cycle	AT1G24180.1	Thiamin diphosphate-binding fold (THDP-binding) superfamily protein
SDT	1213	Pavir.Ea02983.1	Pavir.Ea02983.1.p|PACid:30228167	30228167	Pavir.Ea02983.1.p|PACid:30228167	2.4691	5.53698264529587	<.0001	22	TCA cycle	AT1G79750.1	NADP-malic enzyme 4
SDT	3051	Pavir.Bb02852.1	Pavir.Bb02852.1.p|PACid:30298946	30298946	Pavir.Bb02852.1.p|PACid:30298946	2.4024	5.28681923698568	<.0001	2	TCA cycle	AT2G05710.1	aconitase 3
SDT	315	Pavir.Da00449.1	Pavir.Da00449.1.p|PACid:30194478	30194478	Pavir.Da00449.1.p|PACid:30194478	1.6793	3.20272516136057	<.0001	4	Transport	AT1G15690.1	Inorganic H pyrophosphatase family protein
SDT	4601	Pavir.Ab02274.1	Pavir.Ab02274.1.p|PACid:30236541	30236541	Pavir.Ab02274.1.p|PACid:30236541	3.385	10.4468782967113	<.0001	2	Transport	AT5G58070.1	temperature-induced lipocalin
SDT	4260	Pavir.Aa01363.1	Pavir.Aa01363.1.p|PACid:30251544	30251544	Pavir.Aa01363.1.p|PACid:30251544	3.6768	12.7887202696667	<.0001	3	Transport	AT5G58070.1	temperature-induced lipocalin
SDT	4900	Pavir.J06780.1	Pavir.J06780.1.p|PACid:30220067	30220067	Pavir.J06780.1.p|PACid:30220067	-2.083	0.236023104787562	<.0001	5	Unclassified	AT3G07570.1	Cytochrome b561/ferric reductase transmembrane with DOMON related domain
SDT	2462	Pavir.J29111.1	Pavir.J29111.1.p|PACid:30244668	30244668	Pavir.J29111.1.p|PACid:30244668	-1.7781	0.29156713185314	<.0001	5	Unclassified	AT5G16730.1	Plant protein of unknown function (DUF827)
SDT	3803	Pavir.Cb00879.1	Pavir.Cb00879.1.p|PACid:30269771	30269771	Pavir.Cb00879.1.p|PACid:30269771	-1.6795	0.312190815570246	<.0001	9	Unclassified	AT4G15790.1	N
SDT	4709	Pavir.Ib04454.1	Pavir.Ib04454.1.p|PACid:30240301	30240301	Pavir.Ib04454.1.p|PACid:30240301	-1.661	0.316219885588484	<.0001	2	Unclassified	AT5G66100.1	winged-helix DNA-binding transcription factor family protein
SDT	5311	Pavir.J31761.1	Pavir.J31761.1.p|PACid:30200355	30200355	Pavir.J31761.1.p|PACid:30200355	-1.6258	0.324030158362989	0.0003	2	Unclassified	AT5G54920.2	N
SDT	4893	Pavir.J08753.1	Pavir.J08753.1.p|PACid:30217806	30217806	Pavir.J08753.1.p|PACid:30217806	-1.618	0.325786787340823	<.0001	4	Unclassified	AT1G15230.1	N
SDT	4173	Pavir.Ab01597.1	Pavir.Ab01597.1.p|PACid:30232031	30232031	Pavir.Ab01597.1.p|PACid:30232031	-1.5842	0.333509554973037	<.0001	3	Unclassified	AT2G18910.1	hydroxyproline-rich glycoprotein family protein
SDT	6769	Pavir.J20535.1	Pavir.J20535.1.p|PACid:30301723	30301723	Pavir.J20535.1.p|PACid:30301723	-1.4753	0.359658598323191	0.0005	2	Unclassified	AT1G15230.1	N
SDT	4430	Pavir.J21702.1	Pavir.J21702.1.p|PACid:30200504	30200504	Pavir.J21702.1.p|PACid:30200504	-1.4309	0.370899441359507	0.0002	2	Unclassified	AT4G37210.1	Tetratricopeptide repeat (TPR)-like superfamily protein
SDT	5783	Pavir.Aa01581.1	Pavir.Aa01581.1.p|PACid:30250764	30250764	Pavir.Aa01581.1.p|PACid:30250764	-1.3959	0.380007553303938	<.0001	4	Unclassified	AT4G39860.1	N
SDT	740	Pavir.Ga01477.1	Pavir.Ga01477.1.p|PACid:30305934	30305934	Pavir.Ga01477.1.p|PACid:30305934	-1.3885	0.3819617294014	<.0001	4	Unclassified	AT4G39860.1	N
SDT	3104	Pavir.Ha00643.1	Pavir.Ha00643.1.p|PACid:30317063	30317063	Pavir.Ha00643.1.p|PACid:30317063	1.3968	2.63316878411131	<.0001	2	Unclassified	AT5G41040.1	HXXXD-type acyl-transferase family protein
SDT	6172	Pavir.Fb01135.1	Pavir.Fb01135.1.p|PACid:30278741	30278741	Pavir.Fb01135.1.p|PACid:30278741	1.397	2.63353384411849	<.0001	2	Unclassified	AT1G69840.1	SPFH/Band 7/PHB domain-containing membrane-associated protein family
SDT	2632	Pavir.J02339.1	Pavir.J02339.1.p|PACid:30244319	30244319	Pavir.J02339.1.p|PACid:30244319	1.4512	2.73435393955503	<.0001	11	Unclassified	AT5G06570.1	alpha/beta-Hydrolases superfamily protein
SDT	1574	Pavir.J33685.1	Pavir.J33685.1.p|PACid:30190217	30190217	Pavir.J33685.1.p|PACid:30190217	1.45416	2.73996981545788	<.0001	36	Unclassified	AT2G39050.1	hydroxyproline-rich glycoprotein family protein
SDT	776	Pavir.J06165.1	Pavir.J06165.1.p|PACid:30286075	30286075	Pavir.J06165.1.p|PACid:30286075	1.4578	2.7468916404238	<.0001	3	Unclassified	AT1G21680.1	DPP6 N-terminal domain-like protein
SDT	6130	Pavir.Ea03973.1	Pavir.Ea03973.1.p|PACid:30226069	30226069	Pavir.Ea03973.1.p|PACid:30226069	1.4647	2.76006070862604	0.0002	2	Unclassified	AT3G50440.1	methyl esterase 10
SDT	3174	Pavir.Ca01986.1	Pavir.Ca01986.1.p|PACid:30205594	30205594	Pavir.Ca01986.1.p|PACid:30205594	1.4805	2.7904542628873	<.0001	6	Unclassified	AT1G07090.1	Protein of unknown function (DUF640)
SDT	7258	Pavir.Gb00123.1	Pavir.Gb00123.1.p|PACid:30223647	30223647	Pavir.Gb00123.1.p|PACid:30223647	1.4885	2.80597080816433	<.0001	2	Unclassified	AT5G39590.1	TLD-domain containing nucleolar protein
SDT	6195	Pavir.Ia02314.1	Pavir.Ia02314.1.p|PACid:30215100	30215100	Pavir.Ia02314.1.p|PACid:30215100	1.5215	2.87089387281394	0.0005	2	Unclassified	AT5G04830.1	Nuclear transport factor 2 (NTF2) family protein
SDT	3364	Pavir.Ca00112.1	Pavir.Ca00112.1.p|PACid:30204323	30204323	Pavir.Ca00112.1.p|PACid:30204323	1.52174	2.8713715010193	<.0001	14	Unclassified	AT3G10020.1	N
SDT	7022	Pavir.Ia02396.1	Pavir.Ia02396.1.p|PACid:30212640	30212640	Pavir.Ia02396.1.p|PACid:30212640	1.5454	2.91884985331962	<.0001	2	Unclassified	AT5G22870.1	Late embryogenesis abundant (LEA) hydroxyproline-rich glycoprotein family
SDT	5628	Pavir.Ab00994.1	Pavir.Ab00994.1.p|PACid:30235342	30235342	Pavir.Ab00994.1.p|PACid:30235342	1.5575	2.94343343125123	<.0001	4	Unclassified	AT4G11220.1	VIRB2-interacting protein 2
SDT	6962	Pavir.Ca00576.1	Pavir.Ca00576.1.p|PACid:30203639	30203639	Pavir.Ca00576.1.p|PACid:30203639	1.5591	2.94669961420732	0.0002	2	Unclassified	AT4G32870.1	Polyketide cyclase/dehydrase and lipid transport superfamily protein
SDT	2307	Pavir.Fa01008.1	Pavir.Fa01008.1.p|PACid:30186143	30186143	Pavir.Fa01008.1.p|PACid:30186143	1.56975	2.96853268916953	<.0001	17	Unclassified	AT2G46750.1	D-arabinono-1,4-lactone oxidase family protein
SDT	5853	Pavir.Ea00473.1	Pavir.Ea00473.1.p|PACid:30231117	30231117	Pavir.Ea00473.1.p|PACid:30231117	1.6266	3.08784428144797	<.0001	4	Unclassified	AT5G06570.1	alpha/beta-Hydrolases superfamily protein
SDT	4377	Pavir.Ia00911.1	Pavir.Ia00911.1.p|PACid:30215736	30215736	Pavir.Ia00911.1.p|PACid:30215736	1.6314	3.09813497775315	<.0001	2	Unclassified	AT5G66780.1	N
SDT	3201	Pavir.J35054.1	Pavir.J35054.1.p|PACid:30225162	30225162	Pavir.J35054.1.p|PACid:30225162	1.65478	3.14875170902327	<.0001	14	Unclassified	AT3G11780.1	MD-2-related lipid recognition domain-containing protein / ML domain-containing protein
SDT	5303	Pavir.J06115.1	Pavir.J06115.1.p|PACid:30200586	30200586	Pavir.J06115.1.p|PACid:30200586	1.7597	3.38627701972177	<.0001	2	Unclassified	AT3G51590.1	lipid transfer protein 12
SDT	6376	Pavir.Da02337.1	Pavir.Da02337.1.p|PACid:30193209	30193209	Pavir.Da02337.1.p|PACid:30193209	1.8436	3.58904497014611	<.0001	3	Unclassified	AT5G51570.1	SPFH/Band 7/PHB domain-containing membrane-associated protein family
SDT	2382	Pavir.Fa01556.1	Pavir.Fa01556.1.p|PACid:30187567	30187567	Pavir.Fa01556.1.p|PACid:30187567	2.0438	4.12330162457714	<.0001	11	Unclassified	AT1G32300.1	D-arabinono-1,4-lactone oxidase family protein
SDT	5393	Pavir.J21027.1	Pavir.J21027.1.p|PACid:30247869	30247869	Pavir.J21027.1.p|PACid:30247869	2.1127	4.32499960203581	0.0013	2	Unclassified	AT1G02700.1	N
SDT	3421	Pavir.J01936.1	Pavir.J01936.1.p|PACid:30195714	30195714	Pavir.J01936.1.p|PACid:30195714	2.2349	4.7073006523491	<.0001	9	Unclassified	AT4G39730.1	Lipase/lipooxygenase, PLAT/LH2 family protein
SDT	2799	Pavir.J38252.1	Pavir.J38252.1.p|PACid:30191144	30191144	Pavir.J38252.1.p|PACid:30191144	2.3669	5.15831544305104	<.0001	11	Unclassified	AT1G60420.1	DC1 domain-containing protein
SDT	4451	Pavir.Bb00247.1	Pavir.Bb00247.1.p|PACid:30298381	30298381	Pavir.Bb00247.1.p|PACid:30298381	2.3865	5.22887289083139	<.0001	3	Unclassified	AT3G10260.3	Reticulon family protein
SDT	5995	Pavir.Ia03338.1	Pavir.Ia03338.1.p|PACid:30213628	30213628	Pavir.Ia03338.1.p|PACid:30213628	2.4277	5.38034990544379	<.0001	3	Unclassified	AT1G16770.1	N
SDT	5038	Pavir.Ib03696.1	Pavir.Ib03696.1.p|PACid:30241723	30241723	Pavir.Ib03696.1.p|PACid:30241723	2.448	5.45659133951742	<.0001	3	Unclassified	AT4G31830.1	N
SDT	4531	Pavir.Gb01647.1	Pavir.Gb01647.1.p|PACid:30221346	30221346	Pavir.Gb01647.1.p|PACid:30221346	2.5131	5.7084536890166	<.0001	4	Unclassified	AT1G72100.1	late embryogenesis abundant domain-containing protein / LEA domain-containing protein
SDT	2926	Pavir.J34355.1	Pavir.J34355.1.p|PACid:30220017	30220017	Pavir.J34355.1.p|PACid:30220017	2.5177	5.72668401052012	<.0001	8	Unclassified	AT5G01300.1	PEBP (phosphatidylethanolamine-binding protein) family protein
SDT	2916	Pavir.Gb01551.1	Pavir.Gb01551.1.p|PACid:30224863	30224863	Pavir.Gb01551.1.p|PACid:30224863	2.5205	5.73780922065159	<.0001	3	Unclassified	AT4G39730.1	Lipase/lipooxygenase, PLAT/LH2 family protein
SDT	3441	Pavir.Ea02270.1	Pavir.Ea02270.1.p|PACid:30227344	30227344	Pavir.Ea02270.1.p|PACid:30227344	2.6672	6.35195195393733	<.0001	3	Unclassified	AT2G21820.1	N
SDT	445	Pavir.J02312.1	Pavir.J02312.1.p|PACid:30294775	30294775	Pavir.J02312.1.p|PACid:30294775	2.71232	6.5537470892951	<.0001	75	Unclassified	AT5G01300.1	PEBP (phosphatidylethanolamine-binding protein) family protein
SDT	1979	Pavir.Ga00596.1	Pavir.Ga00596.1.p|PACid:30302580	30302580	Pavir.Ga00596.1.p|PACid:30302580	2.7187	6.58279376641544	<.0001	10	Unclassified	AT5G44310.2	Late embryogenesis abundant protein (LEA) family protein
SDT	374	Pavir.Ib03633.1	Pavir.Ib03633.1.p|PACid:30239106	30239106	Pavir.Ib03633.1.p|PACid:30239106	2.7716	6.82864814935343	<.0001	29	Unclassified	AT3G46750.1	N
SDT	1086	Pavir.J28600.1	Pavir.J28600.1.p|PACid:30202435	30202435	Pavir.J28600.1.p|PACid:30202435	2.8585	7.25260863323469	<.0001	8	Unclassified	AT4G36600.1	Late embryogenesis abundant (LEA) protein
SDT	2660	Pavir.Aa02737.1	Pavir.Aa02737.1.p|PACid:30249647	30249647	Pavir.Aa02737.1.p|PACid:30249647	2.8955	7.44101795438227	<.0001	10	Unclassified	AT5G44310.2	Late embryogenesis abundant protein (LEA) family protein
SDT	1748	Pavir.Fa01601.1	Pavir.Fa01601.1.p|PACid:30186390	30186390	Pavir.Fa01601.1.p|PACid:30186390	2.9459	7.70556102486005	<.0001	13	Unclassified	AT2G46760.1	D-arabinono-1,4-lactone oxidase family protein
SDT	1835	Pavir.Hb00971.1	Pavir.Hb00971.1.p|PACid:30264344	30264344	Pavir.Hb00971.1.p|PACid:30264344	3.0726	8.41288136424235	<.0001	15	Unclassified	AT5G07330.1	N
SDT	349	Pavir.Ib00428.1	Pavir.Ib00428.1.p|PACid:30242435	30242435	Pavir.Ib00428.1.p|PACid:30242435	3.1738	9.02420599234587	<.0001	50	Unclassified	AT4G36600.1	Late embryogenesis abundant (LEA) protein
SDT	3738	Pavir.Gb00543.1	Pavir.Gb00543.1.p|PACid:30223554	30223554	Pavir.Gb00543.1.p|PACid:30223554	3.3731	10.361062140047	<.0001	8	Unclassified	AT5G44310.2	Late embryogenesis abundant protein (LEA) family protein

## Sheet: RT1-D1W_DEPs
Treatment	pro_hit_num	pro_acc	pro_ID	pro_acc_ID	log2_fold	fold_change	p_value	num_pep	Functional group	at_acc	at_annota				Functional group	RT1_D1WUp-DEPs	RT1-D1WDn-DEPs
D1W	7386	Pavir.Ia02656.1	30213207	Pavir.Ia02656.1.p|PACid:30213207	1.3796	2.60196219376157	<.0001	4	Abiotic/biotic stress	AT4G27670.1	heat shock protein 21				Abiotic/biotic stress	56	0
D1W	4176	Pavir.Db00351.1	30262264	Pavir.Db00351.1.p|PACid:30262264	1.3807	2.60394684731116	0.0005	2	Abiotic/biotic stress	AT4G21320.1	Aldolase-type TIM barrel family protein				Amino acid metabolism	11	0
D1W	798	Pavir.Ca00608.1	30204384	Pavir.Ca00608.1.p|PACid:30204384	1.38498	2.61168336830761	<.0001	29	Abiotic/biotic stress	AT2G38870.1	Serine protease inhibitor, potato inhibitor I-type family protein				Ammonia metabolism	1	0
D1W	1882	Pavir.J31129.1	30225767	Pavir.J31129.1.p|PACid:30225767	1.41777	2.671722186585	<.0001	20	Abiotic/biotic stress	AT2G28790.1	Pathogenesis-related thaumatin superfamily protein				Carbohydrates metabolism	1	0
D1W	1122	Pavir.J36067.1	30201011	Pavir.J36067.1.p|PACid:30201011	1.4179	2.67196294400317	<.0001	13	Abiotic/biotic stress	AT5G12020.1	17.6 kDa class II heat shock protein				Cell division & Cell cycle	1	0
D1W	6457	Pavir.J00136.1	30254398	Pavir.J00136.1.p|PACid:30254398	1.4384	2.71020127816029	<.0001	4	Abiotic/biotic stress	AT5G04890.1	HSP20-like chaperones superfamily protein				Cell organization	4	0
D1W	5466	Pavir.Ib02744.1	30237056	Pavir.Ib02744.1.p|PACid:30237056	1.44999	2.73206157623537	<.0001	10	Abiotic/biotic stress	AT4G27670.1	heat shock protein 21				Cell wall synthesis / modification	4	0
D1W	6947	Pavir.Ab03099.1	30236611	Pavir.Ab03099.1.p|PACid:30236611	1.4505	2.73302754455979	0.0011	2	Abiotic/biotic stress	AT3G46230.1	heat shock protein 17.4				Development	20	0
D1W	482	Pavir.Eb00769.1	30314162	Pavir.Eb00769.1.p|PACid:30314162	1.4575	2.74632049974979	<.0001	13	Abiotic/biotic stress	AT5G59720.1	heat shock protein 18.2				DNA synthesis	4	0
D1W	4992	Pavir.J08192.1	30281565	Pavir.J08192.1.p|PACid:30281565	1.4579	2.74708204704231	<.0001	5	Abiotic/biotic stress	AT3G12500.1	basic chitinase				Functional enzyme	47	2
D1W	1159	Pavir.J20033.1	30200741	Pavir.J20033.1.p|PACid:30200741	1.4584	2.74803427812969	<.0001	7	Abiotic/biotic stress	AT5G52640.1	heat shock protein 90.1				Glycolysis	3	0
D1W	41	Pavir.Eb03667.1	30309961	Pavir.Eb03667.1.p|PACid:30309961	1.4667	2.76388961860771	<.0001	13	Abiotic/biotic stress	AT3G12580.1	heat shock protein 70				Lipids metabolism	2	3
D1W	6891	Pavir.Fb02059.1	30281241	Pavir.Fb02059.1.p|PACid:30281241	1.488	2.8049985012848	<.0001	5	Abiotic/biotic stress	AT5G24090.1	chitinase A				Major CHO metabolism	9	0
D1W	8175	Pavir.Ib04161.1	30238734	Pavir.Ib04161.1.p|PACid:30238734	1.4982	2.82490039597509	<.0001	3	Abiotic/biotic stress	AT5G04890.1	HSP20-like chaperones superfamily protein				Major CHO metabolism	6	0
D1W	3109	Pavir.Cb00512.1	30268195	Pavir.Cb00512.1.p|PACid:30268195	1.49831	2.82511579207849	<.0001	17	Abiotic/biotic stress	AT2G28790.1	Pathogenesis-related thaumatin superfamily protein				Minor CHO metabolism	3	0
D1W	2103	Pavir.Ga02291.1	30304813	Pavir.Ga02291.1.p|PACid:30304813	1.5131	2.8542268445083	<.0001	2	Abiotic/biotic stress	AT5G24090.1	chitinase A				Mitochondrial electron transport / ATP synthesis	7	0
D1W	4937	Pavir.Ia01975.1	30210367	Pavir.Ia01975.1.p|PACid:30210367	1.51686	2.86167532786544	<.0001	8	Abiotic/biotic stress	AT5G40020.1	Pathogenesis-related thaumatin superfamily protein				Nucleotide metabolism	1	0
D1W	5317	Pavir.J17463.1	30282282	Pavir.J17463.1.p|PACid:30282282	1.5346	2.89708095634787	0.0006	3	Abiotic/biotic stress	AT3G54420.1	homolog of carrot EP3-3 chitinase				Phyto-hormone metabolism	10	0
D1W	2544	Pavir.J38942.1	30276533	Pavir.J38942.1.p|PACid:30276533	1.5564	2.94119003077117	<.0001	24	Abiotic/biotic stress	AT2G32120.1	heat-shock protein 70T-2				Protein degradation	10	1
D1W	6049	Pavir.Ia03513.1	30211414	Pavir.Ia03513.1.p|PACid:30211414	1.6036	3.03900700432953	<.0001	5	Abiotic/biotic stress	AT2G26890.1	DNAJ heat shock N-terminal domain-containing protein				Protein synthesis	1	2
D1W	2156	Pavir.J17471.1	30294892	Pavir.J17471.1.p|PACid:30294892	1.61988	3.07349470584093	<.0001	33	Abiotic/biotic stress	AT5G39110.1	RmlC-like cupins superfamily protein				Protein targeting	5	0
D1W	561	Pavir.J29514.1	30196199	Pavir.J29514.1.p|PACid:30196199	1.6613	3.16301412833247	<.0001	43	Abiotic/biotic stress	AT5G12030.1	heat shock protein 17.6A				Redox balance	3	0
D1W	345	Pavir.J40704.1	30246796	Pavir.J40704.1.p|PACid:30246796	1.6632	3.16718249777658	<.0001	5	Abiotic/biotic stress	AT1G74310.1	heat shock protein 101				Regulation of transcription	4	1
D1W	9169	Pavir.Fa00806.1	30186240	Pavir.Fa00806.1.p|PACid:30186240	1.6903	3.22723805240632	<.0001	2	Abiotic/biotic stress	AT3G14200.1	Chaperone DnaJ-domain superfamily protein				RNA processing	3	0
D1W	3687	Pavir.Hb01772.1	30264897	Pavir.Hb01772.1.p|PACid:30264897	1.6982	3.24495843788706	<.0001	8	Abiotic/biotic stress	AT4G11650.1	osmotin 34				Secondary metabolism	4	0
D1W	1605	Pavir.Ib01136.1	30237887	Pavir.Ib01136.1.p|PACid:30237887	1.7062	3.26300229017062	<.0001	20	Abiotic/biotic stress	AT3G46230.1	heat shock protein 17.4				Signaling regulation	8	0
D1W	1397	Pavir.Ea00289.1	30226451	Pavir.Ea00289.1.p|PACid:30226451	1.7138	3.28023687587704	<.0001	6	Abiotic/biotic stress	AT5G12020.1	17.6 kDa class II heat shock protein				TCA cycle	2	0
D1W	921	Pavir.J02395.1	30315736	Pavir.J02395.1.p|PACid:30315736	1.7344	3.3274108197896	<.0001	5	Abiotic/biotic stress	AT1G74310.1	heat shock protein 101				TCA cycle	2	0
D1W	1094	Pavir.J08073.1	30308630	Pavir.J08073.1.p|PACid:30308630	1.7501	3.36381881508702	<.0001	10	Abiotic/biotic stress	AT4G27670.1	heat shock protein 21				Transport	10	0
D1W	1228	Pavir.J19824.1	30189354	Pavir.J19824.1.p|PACid:30189354	1.8175	3.52469885238677	<.0001	7	Abiotic/biotic stress	AT5G59720.1	heat shock protein 18.2				Unclassified	58	1
D1W	8138	Pavir.Ea02477.1	30226286	Pavir.Ea02477.1.p|PACid:30226286	1.8764	3.67157736553652	<.0001	2	Abiotic/biotic stress	AT5G24090.1	chitinase A
D1W	4788	Pavir.Ca02660.1	30206509	Pavir.Ca02660.1.p|PACid:30206509	1.9252	3.79789494734452	<.0001	3	Abiotic/biotic stress	AT2G47710.1	Adenine nucleotide alpha hydrolases-like superfamily protein
D1W	1027	Pavir.Ib01026.1	30238031	Pavir.Ib01026.1.p|PACid:30238031	1.9865	3.96274463240513	<.0001	9	Abiotic/biotic stress	AT4G27670.1	heat shock protein 21
D1W	8232	Pavir.Hb01571.1	30264315	Pavir.Hb01571.1.p|PACid:30264315	1.9912	3.97567548073954	<.0001	7	Abiotic/biotic stress	AT1G66100.1	Plant thionin
D1W	2026	Pavir.Ab00731.1	30236320	Pavir.Ab00731.1.p|PACid:30236320	2.0154	4.0429265678272	<.0001	24	Abiotic/biotic stress	AT1G52560.1	HSP20-like chaperones superfamily protein
D1W	49	Pavir.Ia03665.1	30210947	Pavir.Ia03665.1.p|PACid:30210947	2.0528	4.14910451837186	<.0001	21	Abiotic/biotic stress	AT5G02500.1	heat shock cognate protein 70-1
D1W	648	Pavir.J21349.1	30225604	Pavir.J21349.1.p|PACid:30225604	2.1836	4.54285733701831	<.0001	8	Abiotic/biotic stress	AT1G54050.1	HSP20-like chaperones superfamily protein
D1W	3141	Pavir.Bb03197.1	30299608	Pavir.Bb03197.1.p|PACid:30299608	2.3293	5.02561446307462	<.0001	14	Abiotic/biotic stress	AT4G11650.1	osmotin 34
D1W	9503	Pavir.Ea02542.1	30227863	Pavir.Ea02542.1.p|PACid:30227863	2.3499	5.09788913828198	0.025	2	Abiotic/biotic stress	AT2G21490.1	dehydrin LEA
D1W	3986	Pavir.J34849.1	30255001	Pavir.J34849.1.p|PACid:30255001	2.3603	5.13477122490279	<.0001	13	Abiotic/biotic stress	AT3G04720.1	pathogenesis-related 4
D1W	2162	Pavir.Ia04457.1	30209221	Pavir.Ia04457.1.p|PACid:30209221	2.39	5.24157361543345	<.0001	12	Abiotic/biotic stress	AT3G12500.1	basic chitinase
D1W	2344	Pavir.Ib00193.1	30238328	Pavir.Ib00193.1.p|PACid:30238328	2.3939	5.25576219429679	<.0001	17	Abiotic/biotic stress	AT3G12500.1	basic chitinase
D1W	469	Pavir.Ea00606.1	30226304	Pavir.Ea00606.1.p|PACid:30226304	2.4134	5.32728328475921	<.0001	23	Abiotic/biotic stress	AT5G59720.1	heat shock protein 18.2
D1W	5738	Pavir.Gb01434.1	30221789	Pavir.Gb01434.1.p|PACid:30221789	2.4186	5.34651940616056	<.0001	6	Abiotic/biotic stress	AT3G54420.1	homolog of carrot EP3-3 chitinase
D1W	1323	Pavir.J37362.1	30294839	Pavir.J37362.1.p|PACid:30294839	2.4354	5.40914285707285	<.0001	7	Abiotic/biotic stress	AT1G74310.1	heat shock protein 101
D1W	1280	Pavir.J34564.1	30263851	Pavir.J34564.1.p|PACid:30263851	2.4493	5.46151044263836	<.0001	22	Abiotic/biotic stress	AT3G12500.1	basic chitinase
D1W	549	Pavir.Aa00282.1	30253178	Pavir.Aa00282.1.p|PACid:30253178	2.4821	5.58710138480544	<.0001	5	Abiotic/biotic stress	AT1G54050.1	HSP20-like chaperones superfamily protein
D1W	4983	Pavir.Cb00662.1	30269981	Pavir.Cb00662.1.p|PACid:30269981	2.5014	5.66234635945319	<.0001	6	Abiotic/biotic stress	AT5G66400.1	Dehydrin family protein
D1W	6231	Pavir.J38392.1	30207790	Pavir.J38392.1.p|PACid:30207790	2.6192	6.14409277188855	0.0002	2	Abiotic/biotic stress	AT2G14610.1	pathogenesis-related gene 1
D1W	6279	Pavir.Bb00799.1	30298345	Pavir.Bb00799.1.p|PACid:30298345	2.7521	6.73697058390029	<.0001	3	Abiotic/biotic stress	AT4G11650.1	osmotin 34
D1W	1170	Pavir.J31919.1	30199244	Pavir.J31919.1.p|PACid:30199244	2.7836	6.88568412501196	<.0001	6	Abiotic/biotic stress	AT5G52300.2	CAP160 protein
D1W	7710	Pavir.J36772.1	30203019	Pavir.J36772.1.p|PACid:30203019	2.8582	7.25110065246027	<.0001	8	Abiotic/biotic stress	AT3G04720.1	pathogenesis-related 4
D1W	4589	Pavir.Ea03024.1	30231561	Pavir.Ea03024.1.p|PACid:30231561	2.9721	7.84677591011867	<.0001	7	Abiotic/biotic stress	AT4G11650.1	osmotin 34
D1W	2063	Pavir.Eb03806.1	30312699	Pavir.Eb03806.1.p|PACid:30312699	3.0253	8.14153034445178	<.0001	20	Abiotic/biotic stress	AT4G11650.1	osmotin 34
D1W	5518	Pavir.J09458.1	30231778	Pavir.J09458.1.p|PACid:30231778	3.0574	8.32470991191667	<.0001	2	Abiotic/biotic stress	AT3G54420.1	homolog of carrot EP3-3 chitinase
D1W	3247	Pavir.J08876.1	30275693	Pavir.J08876.1.p|PACid:30275693	3.0901	8.51555169223538	<.0001	12	Abiotic/biotic stress	AT3G12500.1	basic chitinase
D1W	1430	Pavir.J13075.1	30246880	Pavir.J13075.1.p|PACid:30246880	4.379	20.8070423447757	<.0001	6	Abiotic/biotic stress	AT5G66400.1	Dehydrin family protein
D1W	347	Pavir.J33609.1	30257266	Pavir.J33609.1.p|PACid:30257266	1.39618	2.63203741964981	<.0001	74	Amino acid metabolism	AT1G67280.1	Glyoxalase/Bleomycin resistance protein/Dioxygenase superfamily protein
D1W	158	Pavir.Fb00620.1	30278273	Pavir.Fb00620.1.p|PACid:30278273	1.39847	2.63621858870639	<.0001	73	Amino acid metabolism	AT1G11840.6	glyoxalase I homolog
D1W	2328	Pavir.J12790.1	30248522	Pavir.J12790.1.p|PACid:30248522	1.39906	2.63729690879899	<.0001	9	Amino acid metabolism	AT5G46180.1	ornithine-delta-aminotransferase
D1W	7894	Pavir.J17816.1	30285619	Pavir.J17816.1.p|PACid:30285619	1.4722	2.77444653156237	<.0001	3	Amino acid metabolism	AT4G33150.1	lysine-ketoglutarate reductase/saccharopine dehydrogenase bifunctional enzyme
D1W	173	Pavir.Fa02123.1	30186363	Pavir.Fa02123.1.p|PACid:30186363	1.48094	2.79130543870064	<.0001	36	Amino acid metabolism	AT1G11840.6	glyoxalase I homolog
D1W	2852	Pavir.Ib03192.1	30238114	Pavir.Ib03192.1.p|PACid:30238114	1.5043	2.83686992054506	<.0001	8	Amino acid metabolism	AT4G08900.1	arginase
D1W	8191	Pavir.Db00968.1	30261483	Pavir.Db00968.1.p|PACid:30261483	1.6887	3.22366091482799	<.0001	2	Amino acid metabolism	AT3G60880.1	dihydrodipicolinate synthase 1
D1W	4022	Pavir.Da02439.1	30193736	Pavir.Da02439.1.p|PACid:30193736	1.7085	3.26820844291904	<.0001	12	Amino acid metabolism	AT5G54080.1	homogentisate 1,2-dioxygenase
D1W	3290	Pavir.Db00371.1	30262621	Pavir.Db00371.1.p|PACid:30262621	2.01726	4.04814228756003	<.0001	5	Amino acid metabolism	AT4G20930.1	6-phosphogluconate dehydrogenase family protein
D1W	1263	Pavir.Fa00915.1	30186533	Pavir.Fa00915.1.p|PACid:30186533	2.0641	4.18173024622827	<.0001	4	Amino acid metabolism	AT5G17330.1	glutamate decarboxylase
D1W	1217	Pavir.Fb01711.1	30278677	Pavir.Fb01711.1.p|PACid:30278677	2.3526	5.10743875774274	<.0001	4	Amino acid metabolism	AT5G17330.1	glutamate decarboxylase
D1W	6304	Pavir.Ia00863.1	30209658	Pavir.Ia00863.1.p|PACid:30209658	1.7448	3.35148389214359	<.0001	2	Ammonia metabolism	AT1G66200.1	glutamine synthase clone F11
D1W	2356	Pavir.Da01109.1	30192598	Pavir.Da01109.1.p|PACid:30192598	1.583	2.99592186884836	<.0001	2	Carbohydrates metabolism	AT5G14780.1	formate dehydrogenase
D1W	3629	Pavir.Fa02193.1	30185674	Pavir.Fa02193.1.p|PACid:30185674	1.47384	2.77760220850557	<.0001	14	Cell division & Cell cycle	AT3G63190.1	ribosome recycling factor, chloroplast precursor
D1W	6724	Pavir.Bb01893.1	30297522	Pavir.Bb01893.1.p|PACid:30297522	1.50931	2.84673855148299	<.0001	8	Cell organization	AT1G68090.1	annexin 5
D1W	407	Pavir.J00639.1	30255563	Pavir.J00639.1.p|PACid:30255563	1.62516	3.0847637430925	<.0001	42	Cell organization	AT5G09810.1	actin 7
D1W	1051	Pavir.J16347.1	30307684	Pavir.J16347.1.p|PACid:30307684	2.1373	4.39937932736161	<.0001	26	Cell organization	AT1G01750.1	actin depolymerizing factor 11
D1W	831	Pavir.J00892.1	30275043	Pavir.J00892.1.p|PACid:30275043	3.1013	8.5819173085479	<.0001	24	Cell organization	AT1G01750.1	actin depolymerizing factor 11
D1W	3615	Pavir.Ia01549.1	30215484	Pavir.Ia01549.1.p|PACid:30215484	1.4486	2.72943057200938	<.0001	11	Cell wall synthesis / modification	AT1G65680.1	expansin B2
D1W	4309	Pavir.Cb02121.1	30267871	Pavir.Cb02121.1.p|PACid:30267871	1.741	3.34266783568741	<.0001	4	Cell wall synthesis / modification	AT3G10740.1	alpha-L-arabinofuranosidase 1
D1W	8141	Pavir.Aa00841.1	30252973	Pavir.Aa00841.1.p|PACid:30252973	1.7778	3.4290287492635	<.0001	2	Cell wall synthesis / modification	AT2G45110.1	expansin B4
D1W	4736	Pavir.Ha01909.1	30318209	Pavir.Ha01909.1.p|PACid:30318209	2.0911	4.26072813450787	<.0001	2	Cell wall synthesis / modification	AT3G10740.1	alpha-L-arabinofuranosidase 1
D1W	3108	Pavir.Bb02409.1	30298298	Pavir.Bb02409.1.p|PACid:30298298	1.4345	2.70288475523762	<.0001	10	Development	AT2G33690.1	Late embryogenesis abundant protein, group 6
D1W	7802	Pavir.Ca01448.1	30204925	Pavir.Ca01448.1.p|PACid:30204925	1.4801	2.78968069193004	<.0001	2	Development	AT3G51810.1	Stress induced protein
D1W	4845	Pavir.Ea00389.1	30228609	Pavir.Ea00389.1.p|PACid:30228609	1.50886	2.84585074599032	<.0001	5	Development	AT5G62200.1	Embryo-specific protein 3, (ATS3)
D1W	6147	Pavir.Eb02512.1	30308767	Pavir.Eb02512.1.p|PACid:30308767	1.7476	3.3579948088423	<.0001	8	Development	AT1G01470.1	Late embryogenesis abundant protein
D1W	5770	Pavir.J24821.1	30277014	Pavir.J24821.1.p|PACid:30277014	1.8558	3.61952404417255	<.0001	8	Development	AT1G52690.1	Late embryogenesis abundant protein (LEA) family protein
D1W	6989	Pavir.Ea02626.1	30225983	Pavir.Ea02626.1.p|PACid:30225983	1.8602	3.63057989162693	<.0001	5	Development	AT5G10830.1	S-adenosyl-L-methionine-dependent methyltransferases superfamily protein
D1W	3163	Pavir.Da01632.1	30191845	Pavir.Da01632.1.p|PACid:30191845	1.9089	3.75522668776145	<.0001	3	Development	AT3G22490.1	Seed maturation protein
D1W	4149	Pavir.Ia02723.1	30214198	Pavir.Ia02723.1.p|PACid:30214198	2.0884	4.25276164988803	<.0001	12	Development	AT2G03440.1	nodulin-related protein 1
D1W	3190	Pavir.J07119.1	30283861	Pavir.J07119.1.p|PACid:30283861	2.1342	4.38993628252717	0.0007	3	Development	AT1G01470.1	Late embryogenesis abundant protein
D1W	2717	Pavir.Ia03678.1	30215378	Pavir.Ia03678.1.p|PACid:30215378	2.1651	4.48497517613001	<.0001	16	Development	AT3G53040.1	late embryogenesis abundant protein, putative / LEA protein, putative
D1W	6268	Pavir.J19751.1	30274240	Pavir.J19751.1.p|PACid:30274240	2.2268	4.68094560406723	<.0001	3	Development	AT1G28330.1	dormancy-associated protein-like 1
D1W	297	Pavir.Ca01780.1	30206225	Pavir.Ca01780.1.p|PACid:30206225	2.33884	5.05895708200896	<.0001	50	Development	AT3G15670.1	Late embryogenesis abundant protein (LEA) family protein
D1W	8972	Pavir.Ga01132.1	30306045	Pavir.Ga01132.1.p|PACid:30306045	2.4157	5.3357830184548	<.0001	2	Development	AT2G35300.1	Late embryogenesis abundant protein, group 1 protein
D1W	1811	Pavir.J19600.1	30274742	Pavir.J19600.1.p|PACid:30274742	2.4632	5.51438501500205	<.0001	8	Development	AT3G22490.1	Seed maturation protein
D1W	4113	Pavir.Ea00105.1	30227246	Pavir.Ea00105.1.p|PACid:30227246	2.557	5.88482698342295	<.0001	2	Development	AT1G01470.1	Late embryogenesis abundant protein
D1W	2526	Pavir.J27516.1	30294035	Pavir.J27516.1.p|PACid:30294035	2.559	5.89299074326592	<.0001	5	Development	AT3G22490.1	Seed maturation protein
D1W	5678	Pavir.J00999.1	30308562	Pavir.J00999.1.p|PACid:30308562	2.6221	6.15645559883841	<.0001	9	Development	AT2G36640.1	embryonic cell protein 63
D1W	4165	Pavir.Fb00948.1	30279736	Pavir.Fb00948.1.p|PACid:30279736	3.0128	8.07129407425011	<.0001	5	Development	AT3G22490.1	Seed maturation protein
D1W	6831	Pavir.Ga01295.1	30303990	Pavir.Ga01295.1.p|PACid:30303990	3.4883	11.2223273798998	<.0001	4	Development	AT4G26740.1	seed gene 1
D1W	368	Pavir.J00158.1	30282759	Pavir.J00158.1.p|PACid:30282759	3.49971	11.311434528648	<.0001	50	Development	AT3G15670.1	Late embryogenesis abundant protein (LEA) family protein
D1W	8861	Pavir.Ba02673.1	30290867	Pavir.Ba02673.1.p|PACid:30290867	1.4499	2.73189114668132	0.0065	2	DNA synthesis	AT1G08170.1	Histone superfamily protein
D1W	2022	Pavir.Ib00396.1	30236817	Pavir.Ib00396.1.p|PACid:30236817	1.5166	2.86115964816614	<.0001	4	DNA synthesis	AT3G54560.1	histone H2A 11
D1W	430	Pavir.Ib00038.1	30238568	Pavir.Ib00038.1.p|PACid:30238568	1.55514	2.93862241841891	<.0001	152	DNA synthesis	AT3G53730.1	Histone superfamily protein
D1W	5288	Pavir.J24812.1	30294359	Pavir.J24812.1.p|PACid:30294359	1.6507	3.13985949137847	<.0001	2	DNA synthesis	AT4G40030.2	Histone superfamily protein
D1W	1389	Pavir.J03092.1	30216516	Pavir.J03092.1.p|PACid:30216516	2.0987	4.28323252698933	<.0001	5	DNA synthesis	AT5G02560.1	histone H2A 12
D1W	3407	Pavir.Bb00696.1	30297757	Pavir.Bb00696.1.p|PACid:30297757	-1.7295	0.301556450315977	<.0001	14	Functional enzyme	AT1G19715.3	Mannose-binding lectin superfamily protein
D1W	2315	Pavir.Ib01632.1	30237007	Pavir.Ib01632.1.p|PACid:30237007	-1.5115	0.350746351020542	<.0001	7	Functional enzyme	AT5G42180.1	Peroxidase superfamily protein
D1W	4733	Pavir.Eb03869.1	30309432	Pavir.Eb03869.1.p|PACid:30309432	1.3886	2.61824481391803	<.0001	8	Functional enzyme	AT3G57240.1	beta-1,3-glucanase 3
D1W	2165	Pavir.Cb01684.1	30268766	Pavir.Cb01684.1.p|PACid:30268766	1.40764	2.6530281805486	<.0001	20	Functional enzyme	AT1G09010.1	glycoside hydrolase family 2 protein
D1W	2566	Pavir.Ca00381.1	30203810	Pavir.Ca00381.1.p|PACid:30203810	1.4281	2.69092093100514	<.0001	10	Functional enzyme	AT5G16970.1	alkenal reductase
D1W	8091	Pavir.Eb02854.1	30311461	Pavir.Eb02854.1.p|PACid:30311461	1.4598	2.7507022815404	0.0005	2	Functional enzyme	AT1G10360.1	glutathione S-transferase TAU 18
D1W	5053	Pavir.J37309.1	30271745	Pavir.J37309.1.p|PACid:30271745	1.4941	2.81688369855678	<.0001	4	Functional enzyme	AT4G37560.1	Acetamidase/Formamidase family protein
D1W	2080	Pavir.Ia04860.1	30210096	Pavir.Ia04860.1.p|PACid:30210096	1.50904	2.84620583495722	<.0001	18	Functional enzyme	AT2G47730.1	glutathione S-transferase phi 8
D1W	737	Pavir.Ea01261.1	30231507	Pavir.Ea01261.1.p|PACid:30231507	1.51555	2.85907804077925	<.0001	34	Functional enzyme	AT1G71695.1	Peroxidase superfamily protein
D1W	2697	Pavir.Ib00352.1	30239823	Pavir.Ib00352.1.p|PACid:30239823	1.5172	2.8623498184839	<.0001	10	Functional enzyme	AT2G47730.1	glutathione S-transferase phi 8
D1W	1523	Pavir.J02614.1	30306905	Pavir.J02614.1.p|PACid:30306905	1.54213	2.91224150573387	<.0001	46	Functional enzyme	AT1G17180.1	glutathione S-transferase TAU 25
D1W	225	Pavir.Ea01477.2	30231125	Pavir.Ea01477.2.p|PACid:30231125	1.5486	2.9253312549149	<.0001	29	Functional enzyme	AT1G44970.1	Peroxidase superfamily protein
D1W	7251	Pavir.J22570.1	30308575	Pavir.J22570.1.p|PACid:30308575	1.564	2.95672486254768	<.0001	5	Functional enzyme	AT1G10360.1	glutathione S-transferase TAU 18
D1W	3549	Pavir.J02529.1	30225526	Pavir.J02529.1.p|PACid:30225526	1.5657	2.96021097342773	<.0001	11	Functional enzyme	AT1G54870.1	NAD(P)-binding Rossmann-fold superfamily protein
D1W	1065	Pavir.Ca00811.1	30204135	Pavir.Ca00811.1.p|PACid:30204135	1.5796	2.98886969173839	<.0001	21	Functional enzyme	AT4G25150.1	HAD superfamily, subfamily IIIB acid phosphatase
D1W	8224	Pavir.Aa00441.1	30252765	Pavir.Aa00441.1.p|PACid:30252765	1.5973	3.0257651193227	<.0001	2	Functional enzyme	AT2G02850.1	plantacyanin
D1W	5574	Pavir.Eb03999.1	30313144	Pavir.Eb03999.1.p|PACid:30313144	1.6135	3.05993286393619	<.0001	5	Functional enzyme	AT1G71695.1	Peroxidase superfamily protein
D1W	3359	Pavir.Fa01764.1	30187362	Pavir.Fa01764.1.p|PACid:30187362	1.6313	3.09792023884304	<.0001	12	Functional enzyme	AT5G58090.1	O-Glycosyl hydrolases family 17 protein
D1W	6742	Pavir.Gb01302.1	30222088	Pavir.Gb01302.1.p|PACid:30222088	1.6496	3.13746638059312	<.0001	4	Functional enzyme	AT3G48280.1	cytochrome P450, family 71, subfamily A, polypeptide 25
D1W	2007	Pavir.Ca00776.1	30206984	Pavir.Ca00776.1.p|PACid:30206984	1.6663	3.17399531791804	<.0001	5	Functional enzyme	AT4G33420.1	Peroxidase superfamily protein
D1W	3621	Pavir.Ia00797.1	30210919	Pavir.Ia00797.1.p|PACid:30210919	1.6734	3.18965414348577	<.0001	10	Functional enzyme	AT2G02850.1	plantacyanin
D1W	7057	Pavir.Ib02543.1	30241255	Pavir.Ib02543.1.p|PACid:30241255	1.6825	3.2098369173649	<.0001	2	Functional enzyme	AT1G10370.1	Glutathione S-transferase family protein
D1W	2286	Pavir.J08895.1	30257540	Pavir.J08895.1.p|PACid:30257540	1.7131	3.27864568107506	<.0001	16	Functional enzyme	AT3G03080.1	Zinc-binding dehydrogenase family protein
D1W	9164	Pavir.J04349.1	30285557	Pavir.J04349.1.p|PACid:30285557	1.7134	3.27932752716853	<.0001	2	Functional enzyme	AT5G20960.1	aldehyde oxidase 1
D1W	5909	Pavir.Ea03391.1	30231527	Pavir.Ea03391.1.p|PACid:30231527	1.72518	3.30621375157778	<.0001	6	Functional enzyme	AT5G05960.1	Bifunctional inhibitor/lipid-transfer protein/seed storage 2S albumin superfamily protein
D1W	2465	Pavir.Ib01315.1	30241588	Pavir.Ib01315.1.p|PACid:30241588	1.7253	3.30648876614398	<.0001	3	Functional enzyme	AT3G55040.1	glutathione transferase lambda 2
D1W	8620	Pavir.Ca01834.1	30206793	Pavir.Ca01834.1.p|PACid:30206793	1.7294	3.31589885288942	0.0004	2	Functional enzyme	AT3G18280.1	Bifunctional inhibitor/lipid-transfer protein/seed storage 2S albumin superfamily protein
D1W	6406	Pavir.Eb01487.1	30312900	Pavir.Eb01487.1.p|PACid:30312900	1.7322	3.32234063864979	<.0001	8	Functional enzyme	AT3G62760.1	Glutathione S-transferase family protein
D1W	6485	Pavir.Ib00203.1	30238910	Pavir.Ib00203.1.p|PACid:30238910	1.7397	3.33965714332392	<.0001	5	Functional enzyme	AT2G47730.1	glutathione S-transferase phi 8
D1W	4284	Pavir.Ia00908.1	30214178	Pavir.Ia00908.1.p|PACid:30214178	1.78108	3.43683359302608	<.0001	9	Functional enzyme	AT5G42720.1	Glycosyl hydrolase family 17 protein
D1W	8157	Pavir.J01051.1	30191168	Pavir.J01051.1.p|PACid:30191168	1.7823	3.43974114467154	<.0001	2	Functional enzyme	AT1G02850.2	beta glucosidase 11
D1W	7368	Pavir.Ib02545.1	30238813	Pavir.Ib02545.1.p|PACid:30238813	1.7889	3.45551322337504	<.0001	2	Functional enzyme	AT1G10370.1	Glutathione S-transferase family protein
D1W	4230	Pavir.Ia02811.1	30212405	Pavir.Ia02811.1.p|PACid:30212405	1.79859	3.4788006287926	<.0001	3	Functional enzyme	AT5G06720.1	peroxidase 2
D1W	6695	Pavir.Bb00661.1	30300127	Pavir.Bb00661.1.p|PACid:30300127	1.8047	3.49356504170169	<.0001	3	Functional enzyme	N	N
D1W	5448	Pavir.Da00810.1	30192346	Pavir.Da00810.1.p|PACid:30192346	1.8135	3.51493984720486	<.0001	5	Functional enzyme	AT4G20860.1	FAD-binding Berberine family protein
D1W	5393	Pavir.Ib02490.1	30238982	Pavir.Ib02490.1.p|PACid:30238982	1.8458	3.59452216532167	<.0001	11	Functional enzyme	AT1G10360.1	glutathione S-transferase TAU 18
D1W	8415	Pavir.Aa01798.1	30252817	Pavir.Aa01798.1.p|PACid:30252817	1.9645	3.90277421022028	<.0001	2	Functional enzyme	N	N
D1W	8122	Pavir.J08343.1	30273449	Pavir.J08343.1.p|PACid:30273449	2.0192	4.05358950851475	<.0001	3	Functional enzyme	AT5G05960.1	Bifunctional inhibitor/lipid-transfer protein/seed storage 2S albumin superfamily protein
D1W	2927	Pavir.J15786.1	30195529	Pavir.J15786.1.p|PACid:30195529	2.0347	4.09737517832247	<.0001	12	Functional enzyme	AT1G71695.1	Peroxidase superfamily protein
D1W	9143	Pavir.Ia01105.1	30210515	Pavir.Ia01105.1.p|PACid:30210515	2.0692	4.19653903381673	<.0001	2	Functional enzyme	AT2G19440.1	O-Glycosyl hydrolases family 17 protein
D1W	5792	Pavir.Aa02058.1	30253206	Pavir.Aa02058.1.p|PACid:30253206	2.0849	4.24245689057789	<.0001	3	Functional enzyme	AT2G45550.1	cytochrome P450, family 76, subfamily C, polypeptide 4
D1W	4837	Pavir.J20172.1	30266975	Pavir.J20172.1.p|PACid:30266975	2.1119	4.32260197783577	<.0001	11	Functional enzyme	AT3G09270.1	glutathione S-transferase TAU 8
D1W	265	Pavir.J33952.1	30281345	Pavir.J33952.1.p|PACid:30281345	2.1433	4.41771393093304	<.0001	3	Functional enzyme	AT2G32520.1	alpha/beta-Hydrolases superfamily protein
D1W	3479	Pavir.Da00087.1	30194507	Pavir.Da00087.1.p|PACid:30194507	2.28666	4.87925201205689	<.0001	14	Functional enzyme	AT3G20570.1	early nodulin-like protein 9
D1W	5450	Pavir.Ea02497.1	30228113	Pavir.Ea02497.1.p|PACid:30228113	2.3055	4.94338749921258	<.0001	5	Functional enzyme	AT1G10360.1	glutathione S-transferase TAU 18
D1W	4864	Pavir.J00683.1	30255035	Pavir.J00683.1.p|PACid:30255035	2.3056	4.94373016059893	<.0001	9	Functional enzyme	AT5G05960.1	Bifunctional inhibitor/lipid-transfer protein/seed storage 2S albumin superfamily protein
D1W	6548	Pavir.J18194.1	30255395	Pavir.J18194.1.p|PACid:30255395	2.3322	5.03572674559222	<.0001	5	Functional enzyme	AT5G46940.1	Plant invertase/pectin methylesterase inhibitor superfamily protein
D1W	4017	Pavir.Da00146.1	30192844	Pavir.Da00146.1.p|PACid:30192844	2.4314	5.39416630010086	<.0001	2	Functional enzyme	AT4G30170.1	Peroxidase family protein
D1W	3050	Pavir.Gb01868.1	30222408	Pavir.Gb01868.1.p|PACid:30222408	3.0573	8.32413290699392	<.0001	9	Functional enzyme	AT5G05960.1	Bifunctional inhibitor/lipid-transfer protein/seed storage 2S albumin superfamily protein
D1W	39	Pavir.J07576.1	30308383	Pavir.J07576.1.p|PACid:30308383	1.43522	2.70423400969529	<.0001	29	Glycolysis	AT1G79550.1	phosphoglycerate kinase
D1W	5440	Pavir.J15479.1	30208673	Pavir.J15479.1.p|PACid:30208673	2.1044	4.30018879164891	<.0001	7	Glycolysis	AT5G47810.1	phosphofructokinase 2
D1W	935	Pavir.Ib01540.1	30237822	Pavir.Ib01540.1.p|PACid:30237822	2.17619	4.51958403910504	<.0001	38	Glycolysis	AT3G08590.1	Phosphoglycerate mutase, 2,3-bisphosphoglycerate-independent
D1W	5319	Pavir.Ia00082.1	30209288	Pavir.Ia00082.1.p|PACid:30209288	-1.826	0.282045534364128	<.0001	4	Lipids metabolism	AT5G27200.1	acyl carrier protein 5
D1W	3499	Pavir.Cb00901.1	30269979	Pavir.Cb00901.1.p|PACid:30269979	-1.5478	0.342031238286872	<.0001	8	Lipids metabolism	AT4G25050.1	acyl carrier protein 4
D1W	3843	Pavir.Fb02310.1	30278297	Pavir.Fb02310.1.p|PACid:30278297	-1.4769	0.359259945274814	<.0001	9	Lipids metabolism	AT1G54580.1	acyl carrier protein 2
D1W	8349	Pavir.Fa00184.1	30185480	Pavir.Fa00184.1.p|PACid:30185480	1.4164	2.6691862923527	0.0002	3	Lipids metabolism	AT4G33790.1	Jojoba acyl CoA reductase-related male sterility protein
D1W	5045	Pavir.Ab02053.1	30235451	Pavir.Ab02053.1.p|PACid:30235451	1.5489	2.92593962369954	<.0001	9	Lipids metabolism	AT1G47480.1	alpha/beta-Hydrolases superfamily protein
D1W	6354	Pavir.Aa01512.1	30252328	Pavir.Aa01512.1.p|PACid:30252328	2.3708	5.17227864777456	<.0001	3	Lipids metabolism	AT1G47480.1	alpha/beta-Hydrolases superfamily protein
D1W	970	Pavir.Fa01398.1	30187564	Pavir.Fa01398.1.p|PACid:30187564	1.4851	2.79936576171424	<.0001	21	Major CHO metabolism	AT5G48300.1	ADP glucose pyrophosphorylase 1
D1W	3500	Pavir.J15987.1	30244300	Pavir.J15987.1.p|PACid:30244300	1.4961	2.82079143655577	<.0001	13	Major CHO metabolism	AT3G29320.1	Glycosyl transferase, family 35
D1W	2926	Pavir.Ia03415.1	30214719	Pavir.Ia03415.1.p|PACid:30214719	1.8428	3.58705533272016	<.0001	17	Major CHO metabolism	AT4G02280.1	sucrose synthase 3
D1W	2105	Pavir.J10133.1	30243454	Pavir.J10133.1.p|PACid:30243454	1.9414	3.84078178737088	<.0001	9	Major CHO metabolism	AT5G48300.1	ADP glucose pyrophosphorylase 1
D1W	2601	Pavir.J01199.1	30263609	Pavir.J01199.1.p|PACid:30263609	2.2133	4.63734801677445	<.0001	16	Major CHO metabolism	AT5G03650.1	starch branching enzyme 2.2
D1W	2480	Pavir.J18850.1	30199531	Pavir.J18850.1.p|PACid:30199531	2.2814	4.86149487336565	<.0001	5	Major CHO metabolism	AT5G48300.1	ADP glucose pyrophosphorylase 1
D1W	2693	Pavir.J25812.1	30220787	Pavir.J25812.1.p|PACid:30220787	1.5318	2.89146371932101	<.0001	8	Minor CHO metabolism	AT2G37770.2	NAD(P)-linked oxidoreductase superfamily protein
D1W	3373	Pavir.J34655.1	30270543	Pavir.J34655.1.p|PACid:30270543	1.8494	3.6035028840451	<.0001	6	Minor CHO metabolism	AT2G37770.2	NAD(P)-linked oxidoreductase superfamily protein
D1W	4522	Pavir.J15860.1	30275456	Pavir.J15860.1.p|PACid:30275456	2.1014	4.29125609117152	<.0001	14	Minor CHO metabolism	AT2G37770.2	NAD(P)-linked oxidoreductase superfamily protein
D1W	4959	Pavir.Ba03478.1	30291380	Pavir.Ba03478.1.p|PACid:30291380	1.449	2.73018743577033	<.0001	4	Mitochondrial electron transport / ATP synthesis	AT5G25450.1	Cytochrome bd ubiquinol oxidase, 14kDa subunit
D1W	4663	Pavir.J16145.1	30301857	Pavir.J16145.1.p|PACid:30301857	1.6797	3.20361326843895	<.0001	11	Mitochondrial electron transport / ATP synthesis	AT3G18410.1	Complex I subunit NDUFS6
D1W	8222	Pavir.Ia04222.1	30209404	Pavir.Ia04222.1.p|PACid:30209404	1.7207	3.29596289233222	<.0001	4	Mitochondrial electron transport / ATP synthesis	AT1G69750.1	cytochrome c oxidase 19-2
D1W	8188	Pavir.Ib01375.1	30239296	Pavir.Ib01375.1.p|PACid:30239296	1.7579	3.38205471521625	<.0001	3	Mitochondrial electron transport / ATP synthesis	AT3G06310.1	Cox19-like CHCH family protein
D1W	5803	Pavir.J10328.1	30314966	Pavir.J10328.1.p|PACid:30314966	1.9119	3.76304358670987	<.0001	6	Mitochondrial electron transport / ATP synthesis	AT1G15120.2	Ubiquinol-cytochrome C reductase hinge protein
D1W	8434	Pavir.Ha01832.1	30318014	Pavir.Ha01832.1.p|PACid:30318014	1.9957	3.98809561800811	<.0001	4	Mitochondrial electron transport / ATP synthesis	AT1G15120.1	Ubiquinol-cytochrome C reductase hinge protein
D1W	9708	Pavir.J22241.1	30302017	Pavir.J22241.1.p|PACid:30302017	2.1966	4.58397761824162	<.0001	2	Mitochondrial electron transport / ATP synthesis	AT3G62790.1	NADH-ubiquinone oxidoreductase-related
D1W	5325	Pavir.J15793.1	30248019	Pavir.J15793.1.p|PACid:30248019	1.6824	3.20961443613467	<.0001	6	Nucleotide metabolism	AT5G18280.1	apyrase 2
D1W	1209	Pavir.Ib03775.1	30239410	Pavir.Ib03775.1.p|PACid:30239410	1.53846	2.90484261456012	<.0001	41	Phyto-hormone metabolism	AT2G33830.2	Dormancy/auxin associated family protein
D1W	824	Pavir.Cb00761.1	30268661	Pavir.Cb00761.1.p|PACid:30268661	1.6431	3.12336245791475	<.0001	25	Phyto-hormone metabolism	AT5G13200.1	GRAM domain family protein
D1W	1514	Pavir.Fa01472.1	30186898	Pavir.Fa01472.1.p|PACid:30186898	1.6441	3.12552815828416	<.0001	10	Phyto-hormone metabolism	AT2G42680.1	multiprotein bridging factor 1A
D1W	521	Pavir.Ga02521.1	30303335	Pavir.Ga02521.1.p|PACid:30303335	1.7314	3.3204988525113	0.0002	2	Phyto-hormone metabolism	AT1G60710.1	NAD(P)-linked oxidoreductase superfamily protein
D1W	1632	Pavir.Fb01387.1	30279215	Pavir.Fb01387.1.p|PACid:30279215	1.7417	3.34429010176989	<.0001	7	Phyto-hormone metabolism	AT2G42680.1	multiprotein bridging factor 1A
D1W	886	Pavir.Ca02189.1	30206971	Pavir.Ca02189.1.p|PACid:30206971	2.07671	4.21844122285556	<.0001	35	Phyto-hormone metabolism	AT5G13200.1	GRAM domain family protein
D1W	8731	Pavir.Ea00295.1	30226575	Pavir.Ea00295.1.p|PACid:30226575	2.1545	4.45214321024633	<.0001	3	Phyto-hormone metabolism	AT1G03400.1	2-oxoglutarate (2OG) and Fe(II)-dependent oxygenase superfamily protein
D1W	256	Pavir.J00130.1	30200135	Pavir.J00130.1.p|PACid:30200135	2.312	4.96570996610445	<.0001	6	Phyto-hormone metabolism	AT1G60730.1	NAD(P)-linked oxidoreductase superfamily protein
D1W	7673	Pavir.J06494.1	30286195	Pavir.J06494.1.p|PACid:30286195	2.4349	5.40726851582988	<.0001	2	Phyto-hormone metabolism	AT2G14900.1	Gibberellin-regulated family protein
D1W	2771	Pavir.J01160.1	30306248	Pavir.J01160.1.p|PACid:30306248	2.5743	5.95581936972919	<.0001	15	Phyto-hormone metabolism	AT3G22850.1	Aluminium induced protein with YGL and LRDR motifs
D1W	7176	Pavir.J10403.1	30271807	Pavir.J10403.1.p|PACid:30271807	-1.646	0.319524840800763	<.0001	4	Protein degradation	AT5G60710.1	Zinc finger (C3HC4-type RING finger) family protein
D1W	1398	Pavir.Ib03699.1	30237185	Pavir.Ib03699.1.p|PACid:30237185	1.3986	2.63645614678198	<.0001	7	Protein degradation	AT4G36195.1	Serine carboxypeptidase S28 family protein
D1W	2001	Pavir.J37948.1	30271721	Pavir.J37948.1.p|PACid:30271721	1.4997	2.82783903100756	0.0002	2	Protein degradation	AT1G16890.2	ubiquitin-conjugating enzyme 36
D1W	3943	Pavir.Bb01503.1	30300143	Pavir.Bb01503.1.p|PACid:30300143	1.5697	2.96842980944912	<.0001	10	Protein degradation	AT2G22980.1	serine carboxypeptidase-like 13
D1W	1102	Pavir.Db01460.1	30261745	Pavir.Db01460.1.p|PACid:30261745	1.58675	3.00371930388927	<.0001	22	Protein degradation	AT1G03230.1	Eukaryotic aspartyl protease family protein
D1W	7373	Pavir.Bb00974.1	30298341	Pavir.Bb00974.1.p|PACid:30298341	1.7395	3.33919420062681	<.0001	3	Protein degradation	AT1G20160.1	Subtilisin-like serine endopeptidase family protein
D1W	2256	Pavir.Da00795.1	30194578	Pavir.Da00795.1.p|PACid:30194578	1.7543	3.37362589384939	<.0001	10	Protein degradation	AT1G03230.1	Eukaryotic aspartyl protease family protein
D1W	5464	Pavir.Eb03276.1	30312971	Pavir.Eb03276.1.p|PACid:30312971	1.7897	3.45742989813955	<.0001	5	Protein degradation	AT5G65760.1	Serine carboxypeptidase S28 family protein
D1W	2985	Pavir.Ea00101.1	30231090	Pavir.Ea00101.1.p|PACid:30231090	1.903	3.73990079100582	<.0001	12	Protein degradation	AT1G64110.3	P-loop containing nucleoside triphosphate hydrolases superfamily protein
D1W	1857	Pavir.J36542.1	30207798	Pavir.J36542.1.p|PACid:30207798	1.9851	3.95890102625916	<.0001	5	Protein degradation	AT1G03230.1	Eukaryotic aspartyl protease family protein
D1W	1819	Pavir.Gb02161.1	30221760	Pavir.Gb02161.1.p|PACid:30221760	2.6431	6.2467249158295	<.0001	4	Protein degradation	AT1G03230.1	Eukaryotic aspartyl protease family protein
D1W	627	Pavir.J04506.2	30271067	Pavir.J04506.2.p|PACid:30271067	-1.4518	0.365565036662329	<.0001	3	Protein synthesis	AT1G02780.1	Ribosomal protein L19e family protein
D1W	656	Pavir.J10550.1	30285869	Pavir.J10550.1.p|PACid:30285869	-1.4091	0.376546515538308	<.0001	3	Protein synthesis	AT3G16780.1	Ribosomal protein L19e family protein
D1W	3455	Pavir.Gb01843.1	30224099	Pavir.Gb01843.1.p|PACid:30224099	1.45363	2.7389634230806	<.0001	14	Protein synthesis	AT5G52650.1	RNA binding Plectin/S10 domain-containing protein
D1W	8502	Pavir.Bb03061.1	30298079	Pavir.Bb03061.1.p|PACid:30298079	1.4097	2.65681910074691	<.0001	3	Protein targeting	AT2G20890.1	photosystem II reaction center PSB29 protein
D1W	3044	Pavir.Ib01764.1	30241518	Pavir.Ib01764.1.p|PACid:30241518	1.5826	2.99509133807107	<.0001	8	Protein targeting & vesicle tansport	AT3G17440.1	novel plant snare 13
D1W	982	Pavir.Ia03535.1	30211090	Pavir.Ia03535.1.p|PACid:30211090	2.2692	4.82055748482613	<.0001	7	Protein targeting & vesicle tansport	AT4G16160.2	Mitochondrial import inner membrane translocase subunit Tim17/Tim22/Tim23 family protein
D1W	1388	Pavir.J08185.1	30185137	Pavir.J08185.1.p|PACid:30185137	2.62034	6.14894967763303	<.0001	35	Protein targeting & vesicle tansport	AT4G16160.2	Mitochondrial import inner membrane translocase subunit Tim17/Tim22/Tim23 family protein
D1W	1154	Pavir.J11658.1	30207612	Pavir.J11658.1.p|PACid:30207612	2.8906	7.41578799340664	<.0001	13	Protein targeting & vesicle tansport	AT4G16160.2	Mitochondrial import inner membrane translocase subunit Tim17/Tim22/Tim23 family protein
D1W	5609	Pavir.J14234.1	30236731	Pavir.J14234.1.p|PACid:30236731	1.6098	3.0520952783446	<.0001	6	Redox balance	AT3G26060.1	Thioredoxin superfamily protein
D1W	2021	Pavir.J14586.1	30254928	Pavir.J14586.1.p|PACid:30254928	1.8333	3.56351253698792	<.0001	4	Redox balance	AT1G20630.1	catalase 1
D1W	6728	Pavir.Ab02318.1	30235492	Pavir.Ab02318.1.p|PACid:30235492	2.5115	5.70212632057537	<.0001	3	Redox balance	AT5G40370.1	Glutaredoxin family protein
D1W	7996	Pavir.J17245.1	30295398	Pavir.J17245.1.p|PACid:30295398	-1.7389	0.299598021167525	0.0002	2	Regulation of transcription	AT1G75250.1	RAD-like 6
D1W	7728	Pavir.Ab02420.1	30232026	Pavir.Ab02420.1.p|PACid:30232026	1.3965	2.6326212889819	<.0001	2	Regulation of transcription	AT5G23750.2	Remorin family protein
D1W	1809	Pavir.Ga00880.1	30306064	Pavir.Ga00880.1.p|PACid:30306064	1.7148	3.28251135100107	<.0001	19	Regulation of transcription	AT3G61260.1	Remorin family protein
D1W	1358	Pavir.Gb00738.1	30224391	Pavir.Gb00738.1.p|PACid:30224391	1.82385	3.54024695235311	<.0001	22	Regulation of transcription	AT3G61260.1	Remorin family protein
D1W	4379	Pavir.Ia04404.1	30211920	Pavir.Ia04404.1.p|PACid:30211920	3.6791	12.8091248006047	<.0001	5	Regulation of transcription	AT5G42290.1	transcription activator-related
D1W	3356	Pavir.Ia00088.1	30209179	Pavir.Ia00088.1.p|PACid:30209179	1.8145	3.51737706242664	<.0001	11	RNA processing	AT1G24450.1	Ribonuclease III family protein
D1W	3903	Pavir.Ba01215.1	30290531	Pavir.Ba01215.1.p|PACid:30290531	2.8727	7.32434627798723	<.0001	7	RNA processing	AT1G14220.1	Ribonuclease T2 family protein
D1W	7741	Pavir.Ba01216.1	30291840	Pavir.Ba01216.1.p|PACid:30291840	3.1744	9.02795983464556	<.0001	2	RNA processing	AT1G14220.1	Ribonuclease T2 family protein
D1W	3228	Pavir.Gb00413.1	30223284	Pavir.Gb00413.1.p|PACid:30223284	1.6761	3.19562916225441	<.0001	13	Secondary metabolism	AT1G61720.1	NAD(P)-binding Rossmann-fold superfamily protein
D1W	6043	Pavir.Bb00666.1	30301397	Pavir.Bb00666.1.p|PACid:30301397	1.6774	3.19851001376176	<.0001	4	Secondary metabolism	AT5G49690.1	UDP-Glycosyltransferase superfamily protein
D1W	4657	Pavir.Fa02186.1	30187239	Pavir.Fa02186.1.p|PACid:30187239	1.91386	3.76815941340625	<.0001	8	Secondary metabolism	AT5G67150.1	HXXXD-type acyl-transferase family protein
D1W	5749	Pavir.Ea03286.1	30226410	Pavir.Ea03286.1.p|PACid:30226410	2.144	4.41985793919965	<.0001	4	Secondary metabolism	AT5G58490.1	NAD(P)-binding Rossmann-fold superfamily protein
D1W	7729	Pavir.Ga00721.1	30303027	Pavir.Ga00721.1.p|PACid:30303027	1.3865	2.6144364454157	<.0001	2	Signaling regulation	AT1G64850.1	Calcium-binding EF hand family protein
D1W	2959	Pavir.Eb00944.1	30309163	Pavir.Eb00944.1.p|PACid:30309163	1.6123	3.05738874154881	<.0001	13	Signaling regulation	AT4G15800.1	ralf-like 33
D1W	4030	Pavir.Ia02771.1	30212791	Pavir.Ia02771.1.p|PACid:30212791	1.7459	3.35404024535229	<.0001	2	Signaling regulation	AT4G38810.2	Calcium-binding EF-hand family protein
D1W	7222	Pavir.Cb00876.1	30269914	Pavir.Cb00876.1.p|PACid:30269914	1.7889	3.45551322337504	<.0001	9	Signaling regulation	AT3G05490.1	ralf-like 22
D1W	5422	Pavir.Ea01561.1	30227923	Pavir.Ea01561.1.p|PACid:30227923	1.9133	3.76669703936288	<.0001	7	Signaling regulation	AT4G23180.1	cysteine-rich RLK (RECEPTOR-like protein kinase) 10
D1W	6879	Pavir.Fa01429.1	30188288	Pavir.Fa01429.1.p|PACid:30188288	2.0168	4.04685175244301	<.0001	4	Signaling regulation	AT2G33380.1	Caleosin-related family protein
D1W	1707	Pavir.Eb00019.1	30314169	Pavir.Eb00019.1.p|PACid:30314169	2.711	6.54775345272643	<.0001	20	Signaling regulation	AT4G20260.5	plasma-membrane associated cation-binding protein 1
D1W	1336	Pavir.Ea00048.1	30230356	Pavir.Ea00048.1.p|PACid:30230356	2.9584	7.77261469199432	<.0001	28	Signaling regulation	AT4G20260.5	plasma-membrane associated cation-binding protein 1
D1W	2067	Pavir.Db01776.1	30261030	Pavir.Db01776.1.p|PACid:30261030	1.9777	3.93864666787132	<.0001	3	TCA cycle	AT1G24180.1	Thiamin diphosphate-binding fold (THDP-binding) superfamily protein
D1W	884	Pavir.Ea02983.1	30228167	Pavir.Ea02983.1.p|PACid:30228167	2.15273	4.44668435637535	<.0001	43	TCA cycle	AT1G79750.1	NADP-malic enzyme 4
D1W	4370	Pavir.Ba00708.1	30290880	Pavir.Ba00708.1.p|PACid:30290880	1.5057	2.83962417244214	<.0001	3	Transport	AT3G42050.1	vacuolar ATP synthase subunit H family protein
D1W	7990	Pavir.Ca02941.1	30205105	Pavir.Ca02941.1.p|PACid:30205105	1.5322	2.89226551443818	<.0001	3	Transport	AT2G01980.1	sodium proton exchanger, putative (NHX7) (SOS1)
D1W	2867	Pavir.Gb00671.1	30224537	Pavir.Gb00671.1.p|PACid:30224537	1.5903	3.01111957443809	<.0001	5	Transport	AT5G60660.1	plasma membrane intrinsic protein 2;4
D1W	4509	Pavir.Bb02900.1	30301417	Pavir.Bb02900.1.p|PACid:30301417	1.6218	3.07758776649098	<.0001	2	Transport	AT3G42050.1	vacuolar ATP synthase subunit H family protein
D1W	492	Pavir.J08319.1	30216763	Pavir.J08319.1.p|PACid:30216763	1.6221	3.07822779941921	<.0001	4	Transport	AT3G01390.1	vacuolar membrane ATPase 10
D1W	3908	Pavir.Ab02274.1	30236541	Pavir.Ab02274.1.p|PACid:30236541	1.7115	3.27501156221511	<.0001	5	Transport	AT5G58070.1	temperature-induced lipocalin
D1W	7579	Pavir.Fa00172.1	30188767	Pavir.Fa00172.1.p|PACid:30188767	1.7238	3.3030527276651	<.0001	5	Transport	AT5G04750.1	F1F0-ATPase inhibitor protein, putative
D1W	1272	Pavir.Da00449.1	30194478	Pavir.Da00449.1.p|PACid:30194478	1.7451	3.35218088609215	<.0001	3	Transport	AT1G15690.1	Inorganic H pyrophosphatase family protein
D1W	499	Pavir.Bb00689.1	30298226	Pavir.Bb00689.1.p|PACid:30298226	1.9738	3.92801380496848	0.0002	2	Transport	AT3G01390.1	vacuolar membrane ATPase 10
D1W	7110	Pavir.Ab01809.1	30232311	Pavir.Ab01809.1.p|PACid:30232311	2.0468	4.13188471018371	<.0001	6	Transport	AT5G04750.1	F1F0-ATPase inhibitor protein, putative
D1W	7443	Pavir.J21027.1	30247869	Pavir.J21027.1.p|PACid:30247869	1.6525	3.14377942881103	<.0001	4	Unclassified	AT1G02700.1	N
D1W	4237	Pavir.Bb03606.1	30300086	Pavir.Bb03606.1.p|PACid:30300086	2.9888	7.93813446210075	<.0001	7	Unclassified	AT1G02700.1	N
D1W	5506	Pavir.Cb01473.1	30269358	Pavir.Cb01473.1.p|PACid:30269358	1.4165	2.66937131266024	<.0001	3	Unclassified	AT1G07090.1	Protein of unknown function (DUF640)
D1W	7974	Pavir.Ia03338.1	30213628	Pavir.Ia03338.1.p|PACid:30213628	1.8488	3.60200454091986	<.0001	4	Unclassified	AT1G16770.1	N
D1W	4782	Pavir.Ga02727.1	30302629	Pavir.Ga02727.1.p|PACid:30302629	1.6735	3.18987524112599	<.0001	6	Unclassified	AT1G20225.1	Thioredoxin superfamily protein
D1W	7584	Pavir.J35462.1	30185284	Pavir.J35462.1.p|PACid:30185284	1.4987	2.8258796015211	<.0001	3	Unclassified	AT1G28510.1	Optic atrophy 3 protein (OPA3)
D1W	2417	Pavir.Ca01801.1	30205996	Pavir.Ca01801.1.p|PACid:30205996	1.4993	2.82705509622845	<.0001	9	Unclassified	AT1G29850.1	double-stranded DNA-binding family protein
D1W	2400	Pavir.Fa01556.1	30187567	Pavir.Fa01556.1.p|PACid:30187567	2.2262	4.67899925827782	<.0001	16	Unclassified	AT1G32300.1	D-arabinono-1,4-lactone oxidase family protein
D1W	6773	Pavir.Ib01269.1	30240572	Pavir.Ib01269.1.p|PACid:30240572	1.4755	2.78080002454685	<.0001	3	Unclassified	AT1G47278.2	N
D1W	7003	Pavir.J21738.1	30197325	Pavir.J21738.1.p|PACid:30197325	1.6852	3.2158497435093	<.0001	2	Unclassified	AT1G55160.1	N
D1W	4862	Pavir.J38252.1	30191144	Pavir.J38252.1.p|PACid:30191144	2.0843	4.24069286920184	<.0001	10	Unclassified	AT1G60420.1	DC1 domain-containing protein
D1W	6264	Pavir.Gb00728.1	30224773	Pavir.Gb00728.1.p|PACid:30224773	-1.4162	0.374697952672334	<.0001	2	Unclassified	AT1G63220.1	Calcium-dependent lipid-binding (CaLB domain) family protein
D1W	5897	Pavir.Ia00055.1	30211874	Pavir.Ia00055.1.p|PACid:30211874	1.48368	2.79661178833305	<.0001	5	Unclassified	AT1G65000.1	N
D1W	3374	Pavir.J01632.1	30273203	Pavir.J01632.1.p|PACid:30273203	1.80203	3.48710546971407	<.0001	17	Unclassified	AT1G71950.1	Proteinase inhibitor, propeptide
D1W	6645	Pavir.Gb01647.1	30221346	Pavir.Gb01647.1.p|PACid:30221346	2.1131	4.32619891279993	<.0001	4	Unclassified	AT1G72100.1	late embryogenesis abundant domain-containing protein / LEA domain-containing protein
D1W	8869	Pavir.Eb01891.1	30309685	Pavir.Eb01891.1.p|PACid:30309685	1.5678	2.96452302096334	<.0001	2	Unclassified	AT2G19530.1	N
D1W	3884	Pavir.Ea02270.1	30227344	Pavir.Ea02270.1.p|PACid:30227344	3.4816	11.1703307570459	<.0001	3	Unclassified	AT2G21820.1	N
D1W	5575	Pavir.Hb01608.1	30265005	Pavir.Hb01608.1.p|PACid:30265005	1.619	3.0716205394042	<.0001	9	Unclassified	AT2G31725.1	Eukaryotic protein of unknown function (DUF842)
D1W	5774	Pavir.Ea03201.1	30229441	Pavir.Ea03201.1.p|PACid:30229441	1.9877	3.96604212192543	<.0001	7	Unclassified	AT2G31985.1	Protein of unknown function (DUF1264)
D1W	5064	Pavir.Db00124.1	30261430	Pavir.Db00124.1.p|PACid:30261430	3.9423	15.3727141569573	<.0001	3	Unclassified	AT2G38465.1	N
D1W	76	Pavir.Ia03444.2	30214088	Pavir.Ia03444.2.p|PACid:30214088	1.4022	2.64304318950752	<.0001	12	Unclassified	AT2G39050.1	hydroxyproline-rich glycoprotein family protein
D1W	64	Pavir.Ia03444.1	30214087	Pavir.Ia03444.1.p|PACid:30214087	1.47034	2.77087187076874	<.0001	43	Unclassified	AT2G39050.1	hydroxyproline-rich glycoprotein family protein
D1W	2068	Pavir.J33685.1	30190217	Pavir.J33685.1.p|PACid:30190217	1.56263	2.95391845491928	<.0001	28	Unclassified	AT2G39050.1	hydroxyproline-rich glycoprotein family protein
D1W	1899	Pavir.Ba00326.1	30291073	Pavir.Ba00326.1.p|PACid:30291073	1.6419	3.12076559821018	<.0001	2	Unclassified	AT2G39050.1	hydroxyproline-rich glycoprotein family protein
D1W	3435	Pavir.Fa01601.1	30186390	Pavir.Fa01601.1.p|PACid:30186390	2.6473	6.26493699163502	<.0001	8	Unclassified	AT2G46760.1	D-arabinono-1,4-lactone oxidase family protein
D1W	6273	Pavir.Db02130.1	30260942	Pavir.Db02130.1.p|PACid:30260942	1.4543	2.74023571668861	<.0001	2	Unclassified	AT3G02645.1	Plant protein of unknown function (DUF247)
D1W	6217	Pavir.J06823.1	30294236	Pavir.J06823.1.p|PACid:30294236	1.8211	3.53350512134888	<.0001	2	Unclassified	AT3G02645.1	Plant protein of unknown function (DUF247)
D1W	2282	Pavir.Ca01173.1	30206432	Pavir.Ca01173.1.p|PACid:30206432	1.79088	3.46025893412278	<.0001	7	Unclassified	AT3G05500.1	Rubber elongation factor protein (REF)
D1W	6222	Pavir.Ca00112.1	30204323	Pavir.Ca00112.1.p|PACid:30204323	1.5236	2.8750758148986	<.0001	8	Unclassified	AT3G10020.1	N
D1W	5613	Pavir.Bb00247.1	30298381	Pavir.Bb00247.1.p|PACid:30298381	2.591	6.02516186653525	<.0001	5	Unclassified	AT3G10260.3	Reticulon family protein
D1W	3429	Pavir.J35054.1	30225162	Pavir.J35054.1.p|PACid:30225162	1.4029	2.64432591322751	<.0001	19	Unclassified	AT3G11780.1	MD-2-related lipid recognition domain-containing protein / ML domain-containing protein
D1W	5952	Pavir.Ca02217.1	30206046	Pavir.Ca02217.1.p|PACid:30206046	2.3459	5.08377436462307	<.0001	4	Unclassified	AT3G19340.1	Protein of unknown function (DUF3754)
D1W	2110	Pavir.J30395.1	30283707	Pavir.J30395.1.p|PACid:30283707	1.41452	2.66571029642724	<.0001	18	Unclassified	AT3G21360.1	2-oxoglutarate (2OG) and Fe(II)-dependent oxygenase superfamily protein
D1W	527	Pavir.Ib03633.1	30239106	Pavir.Ib03633.1.p|PACid:30239106	2.55	5.8563427837825	<.0001	28	Unclassified	AT3G46750.1	N
D1W	5817	Pavir.Gb01438.1	30222902	Pavir.Gb01438.1.p|PACid:30222902	1.9253	3.79815820648577	<.0001	3	Unclassified	AT3G59640.1	glycine-rich protein
D1W	6750	Pavir.Ga01381.1	30305691	Pavir.Ga01381.1.p|PACid:30305691	1.9619	3.89574703220698	0.0003	2	Unclassified	AT3G59640.1	glycine-rich protein
D1W	4571	Pavir.Da02334.1	30193518	Pavir.Da02334.1.p|PACid:30193518	1.4811	2.79161502154643	<.0001	3	Unclassified	AT4G12130.1	Glycine cleavage T-protein family
D1W	5664	Pavir.Gb00667.1	30221854	Pavir.Gb00667.1.p|PACid:30221854	1.7859	3.44833515140759	<.0001	5	Unclassified	AT4G13200.1	N
D1W	7807	Pavir.Bb00623.1	30299462	Pavir.Bb00623.1.p|PACid:30299462	1.4511	2.73416441515114	<.0001	2	Unclassified	AT4G14100.1	transferases, transferring glycosyl groups
D1W	6668	Pavir.Ia02150.1	30210804	Pavir.Ia02150.1.p|PACid:30210804	1.6431	3.12336245791475	0.0001	3	Unclassified	AT4G17140.3	pleckstrin homology (PH) domain-containing protein
D1W	7701	Pavir.J05995.1	30271351	Pavir.J05995.1.p|PACid:30271351	2.1905	4.56463657185372	0.0003	2	Unclassified	AT4G17140.3	pleckstrin homology (PH) domain-containing protein
D1W	6736	Pavir.Ib03696.1	30241723	Pavir.Ib03696.1.p|PACid:30241723	2.1907	4.56526940871162	<.0001	4	Unclassified	AT4G31830.1	N
D1W	487	Pavir.Ib00428.1	30242435	Pavir.Ib00428.1.p|PACid:30242435	2.9928	7.96017418360891	<.0001	36	Unclassified	AT4G36600.1	Late embryogenesis abundant (LEA) protein
D1W	1412	Pavir.J28600.1	30202435	Pavir.J28600.1.p|PACid:30202435	3.0484	8.27293931785766	<.0001	8	Unclassified	AT4G36600.1	Late embryogenesis abundant (LEA) protein
D1W	2189	Pavir.Gb01551.1	30224863	Pavir.Gb01551.1.p|PACid:30224863	1.6745	3.19208706062538	<.0001	7	Unclassified	AT4G39730.1	Lipase/lipooxygenase, PLAT/LH2 family protein
D1W	4878	Pavir.J01936.1	30195714	Pavir.J01936.1.p|PACid:30195714	1.9037	3.74171584248665	<.0001	7	Unclassified	AT4G39730.1	Lipase/lipooxygenase, PLAT/LH2 family protein
D1W	5724	Pavir.J34355.1	30220017	Pavir.J34355.1.p|PACid:30220017	1.685	3.21540396297261	<.0001	6	Unclassified	AT5G01300.1	PEBP (phosphatidylethanolamine-binding protein) family protein
D1W	1016	Pavir.J02312.1	30294775	Pavir.J02312.1.p|PACid:30294775	2.54026	5.816938293362	<.0001	57	Unclassified	AT5G01300.1	PEBP (phosphatidylethanolamine-binding protein) family protein
D1W	2124	Pavir.Hb00971.1	30264344	Pavir.Hb00971.1.p|PACid:30264344	2.5823	5.98893718217332	<.0001	18	Unclassified	AT5G07330.1	N
D1W	9261	Pavir.Ib01188.1	30238826	Pavir.Ib01188.1.p|PACid:30238826	1.5253	2.87846565789895	<.0001	2	Unclassified	AT5G16060.1	Cytochrome c oxidase biogenesis protein Cmc1-like
D1W	4659	Pavir.Bb01883.1	30296571	Pavir.Bb01883.1.p|PACid:30296571	1.7291	3.31520940279319	<.0001	6	Unclassified	AT5G16940.1	carbon-sulfur lyases
D1W	3493	Pavir.Aa02737.1	30249647	Pavir.Aa02737.1.p|PACid:30249647	2.5272	5.7645180718524	<.0001	12	Unclassified	AT5G44310.2	Late embryogenesis abundant protein (LEA) family protein
D1W	4061	Pavir.Gb00543.1	30223554	Pavir.Gb00543.1.p|PACid:30223554	3.1394	8.81157553362613	<.0001	9	Unclassified	AT5G44310.2	Late embryogenesis abundant protein (LEA) family protein
D1W	2166	Pavir.Ga00596.1	30302580	Pavir.Ga00596.1.p|PACid:30302580	3.3101	9.91834906325484	<.0001	14	Unclassified	AT5G44310.2	Late embryogenesis abundant protein (LEA) family protein
D1W	5625	Pavir.J16711.1	30307668	Pavir.J16711.1.p|PACid:30307668	1.4881	2.80519293570357	0.0013	3	Unclassified	AT5G45690.1	Protein of unknown function (DUF1264)
D1W	5746	Pavir.Da02337.1	30193209	Pavir.Da02337.1.p|PACid:30193209	1.9339	3.82086689403931	<.0001	7	Unclassified	AT5G51570.1	SPFH/Band 7/PHB domain-containing membrane-associated protein family
D1W	8519	Pavir.J00839.1	30281656	Pavir.J00839.1.p|PACid:30281656	2.3031	4.93517074735158	<.0001	2	Unclassified	AT5G63905.1	N
D1W	4679	Pavir.Ia00911.1	30215736	Pavir.Ia00911.1.p|PACid:30215736	1.5923	3.01529676726524	<.0001	16	Unclassified	AT5G66780.1	N
D1W	2115	Pavir.J05274.1	30201830	Pavir.J05274.1.p|PACid:30201830	1.6414	3.11968421067339	<.0001	15	Unclassified	AT5G66780.1	N

## Sheet: RT1-D3W-DEPs
Treatment	pro_hit_num	pro_acc	pro_ID	pro_acc_ID	log2_fold	fold_change	p_value	num_pep	Functional group	at_acc	at_annota	Functional group	RT1_D3W_Up-DEPs	RT1_D3W_Dn-DEPs
D3W	2220	Pavir.Ba00689.1	30289496	Pavir.Ba00689.1.p|PACid:30289496	-1.6198	0.325380568058698	<.0001	4	Abiotic/biotic stress	AT4G27320.1	Adenine nucleotide alpha hydrolases-like superfamily protein	Abiotic/biotic stress	70	4
D3W	5548	Pavir.J08876.1	30275693	Pavir.J08876.1.p|PACid:30275693	-1.2231	0.428361284613555	<.0001	5	Abiotic/biotic stress	AT3G12500.1	basic chitinase	Cell organization	4	1
D3W	326	Pavir.J11329.1	30271593	Pavir.J11329.1.p|PACid:30271593	-1.08671	0.47083386633738	<.0001	25	Abiotic/biotic stress	AT5G56030.2	heat shock protein 81-2	Cell wall synthesis / modification	4	0
D3W	230	Pavir.Fa00544.1	30185761	Pavir.Fa00544.1.p|PACid:30185761	-1.0119	0.495892736843149	<.0001	4	Abiotic/biotic stress	AT5G56030.1	heat shock protein 81-2	Development	16	3
D3W	8676	Pavir.Hb01571.1	30264315	Pavir.Hb01571.1.p|PACid:30264315	0.9739	1.96414304178712	<.0001	5	Abiotic/biotic stress	AT1G66100.1	Plant thionin	DNA synthesis	3	0
D3W	1060	Pavir.J40704.1	30246796	Pavir.J40704.1.p|PACid:30246796	0.97479	1.96535509739618	<.0001	29	Abiotic/biotic stress	AT1G74310.1	heat shock protein 101	Functional enzyme	47	4
D3W	6027	Pavir.Ia01182.1	30215723	Pavir.Ia01182.1.p|PACid:30215723	0.99417	1.99193421196946	<.0001	9	Abiotic/biotic stress	AT5G04890.1	HSP20-like chaperones superfamily protein	Glycolysis	3	0
D3W	7047	Pavir.Ib02744.1	30237056	Pavir.Ib02744.1.p|PACid:30237056	0.9992	1.9988912719442	<.0001	5	Abiotic/biotic stress	AT4G27670.1	heat shock protein 21	Lipids metabolism	3	6
D3W	4322	Pavir.Ia04457.1	30209221	Pavir.Ia04457.1.p|PACid:30209221	0.9996	1.99944555912093	0.0004	5	Abiotic/biotic stress	AT3G12500.1	basic chitinase	Major CHO metabolism	4	0
D3W	2504	Pavir.J31129.1	30225767	Pavir.J31129.1.p|PACid:30225767	1.00784	2.01089813269049	<.0001	16	Abiotic/biotic stress	AT2G28790.1	Pathogenesis-related thaumatin superfamily protein	Metal binding	3	0
D3W	3239	Pavir.J25699.1	30246579	Pavir.J25699.1.p|PACid:30246579	1.0081	2.01126056592453	0.0004	3	Abiotic/biotic stress	AT5G15870.1	glycosyl hydrolase family 81 protein	Minor CHO metabolism	2	0
D3W	5989	Pavir.Bb00478.1	30300637	Pavir.Bb00478.1.p|PACid:30300637	1.01198	2.01667695251653	<.0001	8	Abiotic/biotic stress	AT5G24090.1	chitinase A	Minor CHO metabolism	2	0
D3W	7162	Pavir.Fa02035.1	30188552	Pavir.Fa02035.1.p|PACid:30188552	1.02347	2.03280242282232	<.0001	2	Abiotic/biotic stress	AT5G39110.1	RmlC-like cupins superfamily protein	Mitochondrial electron transport / ATP synthesis	3	1
D3W	8762	Pavir.Cb00109.1	30267809	Pavir.Cb00109.1.p|PACid:30267809	1.0497	2.07009933786745	0.0003	2	Abiotic/biotic stress	AT4G11650.1	osmotin 34	Phyto-hormone metabolism	9	0
D3W	8654	Pavir.Ib02662.1	30241616	Pavir.Ib02662.1.p|PACid:30241616	1.06483	2.09192336322841	<.0001	2	Abiotic/biotic stress	AT4G27670.1	heat shock protein 21	Protein degradation	6	2
D3W	2052	Pavir.J00406.1	30195439	Pavir.J00406.1.p|PACid:30195439	1.0683	2.09696095647231	<.0001	6	Abiotic/biotic stress	AT2G38870.1	Serine protease inhibitor, potato inhibitor I-type family protein	Protein synthesis	2	10
D3W	7510	Pavir.Ib04161.1	30238734	Pavir.Ib04161.1.p|PACid:30238734	1.1049	2.15083969090099	<.0001	3	Abiotic/biotic stress	AT5G04890.1	HSP20-like chaperones superfamily protein	Protein targeting & vesicle tansport	4	4
D3W	4067	Pavir.Cb00604.1	30269483	Pavir.Cb00604.1.p|PACid:30269483	1.1263	2.18298164518801	<.0001	6	Abiotic/biotic stress	AT2G47710.1	Adenine nucleotide alpha hydrolases-like superfamily protein	Redox balance	5	1
D3W	1594	Pavir.Ib01400.1	30239621	Pavir.Ib01400.1.p|PACid:30239621	1.13191	2.19148681656929	<.0001	11	Abiotic/biotic stress	AT2G40330.1	PYR1-like 6	Regulation of transcription	4	4
D3W	1596	Pavir.Ea00289.1	30226451	Pavir.Ea00289.1.p|PACid:30226451	1.1627	2.23876019180779	<.0001	5	Abiotic/biotic stress	AT5G12020.1	17.6 kDa class II heat shock protein	RNA processing	2	2
D3W	7684	Pavir.Ia02656.1	30213207	Pavir.Ia02656.1.p|PACid:30213207	1.1635	2.24000196832145	<.0001	4	Abiotic/biotic stress	AT4G27670.1	heat shock protein 21	RNA synthesis	0	2
D3W	2959	Pavir.Ia03517.1	30210531	Pavir.Ia03517.1.p|PACid:30210531	1.1669	2.24528720730359	<.0001	4	Abiotic/biotic stress	AT2G40330.1	PYR1-like 6	Secondary metabolism	4	0
D3W	3509	Pavir.J01684.1	30190681	Pavir.J01684.1.p|PACid:30190681	1.1856	2.27457972090243	<.0001	6	Abiotic/biotic stress	AT3G12500.1	basic chitinase	Signaling regulation	6	12
D3W	8647	Pavir.Ia01894.1	30209168	Pavir.Ia01894.1.p|PACid:30209168	1.1867	2.27631466260441	<.0001	2	Abiotic/biotic stress	AT5G20970.1	HSP20-like chaperones superfamily protein	TCA cycle	2	0
D3W	1433	Pavir.J36067.1	30201011	Pavir.J36067.1.p|PACid:30201011	1.2199	2.32930571217247	<.0001	5	Abiotic/biotic stress	AT5G12020.1	17.6 kDa class II heat shock protein	TCA cycle	2	0
D3W	2145	Pavir.J02395.1	30315736	Pavir.J02395.1.p|PACid:30315736	1.234	2.35218250058193	<.0001	3	Abiotic/biotic stress	AT1G74310.1	heat shock protein 101	Transport	4	1
D3W	3835	Pavir.J17471.1	30294892	Pavir.J17471.1.p|PACid:30294892	1.2458	2.37150021629523	<.0001	17	Abiotic/biotic stress	AT5G39110.1	RmlC-like cupins superfamily protein	Unclassified	51	21
D3W	3568	Pavir.J39695.1	30258968	Pavir.J39695.1.p|PACid:30258968	1.2483	2.37561327568195	<.0001	2	Abiotic/biotic stress	AT2G40330.1	PYR1-like 6
D3W	5120	Pavir.J28620.1	30314458	Pavir.J28620.1.p|PACid:30314458	1.2699	2.41144850071551	<.0001	7	Abiotic/biotic stress	AT5G24090.1	chitinase A
D3W	1652	Pavir.Ga01718.1	30303744	Pavir.Ga01718.1.p|PACid:30303744	1.2948	2.4534298133398	<.0001	19	Abiotic/biotic stress	AT4G10250.1	HSP20-like chaperones superfamily protein
D3W	68	Pavir.Ia03665.1	30210947	Pavir.Ia03665.1.p|PACid:30210947	1.3304	2.51472388190351	<.0001	16	Abiotic/biotic stress	AT5G02500.1	heat shock cognate protein 70-1
D3W	8688	Pavir.J15194.1	30216067	Pavir.J15194.1.p|PACid:30216067	1.3344	2.52170585157052	<.0001	2	Abiotic/biotic stress	AT3G10680.1	HSP20-like chaperones superfamily protein
D3W	985	Pavir.Ab00778.1	30233092	Pavir.Ab00778.1.p|PACid:30233092	1.3659	2.57737060506154	<.0001	23	Abiotic/biotic stress	AT5G12030.1	heat shock protein 17.6A
D3W	6561	Pavir.Aa01145.1	30253740	Pavir.Aa01145.1.p|PACid:30253740	1.3719	2.588111908501	0.0001	2	Abiotic/biotic stress	AT2G02100.1	low-molecular-weight cysteine-rich 69
D3W	2016	Pavir.Ib01136.1	30237887	Pavir.Ib01136.1.p|PACid:30237887	1.39421	2.62844582541513	<.0001	23	Abiotic/biotic stress	AT3G46230.1	heat shock protein 17.4
D3W	43	Pavir.Eb03667.1	30309961	Pavir.Eb03667.1.p|PACid:30309961	1.4019	2.6424936412667	<.0001	2	Abiotic/biotic stress	AT3G12580.1	heat shock protein 70
D3W	5856	Pavir.J08192.1	30281565	Pavir.J08192.1.p|PACid:30281565	1.4047	2.64762720494442	<.0001	6	Abiotic/biotic stress	AT3G12500.1	basic chitinase
D3W	980	Pavir.Ca00608.1	30204384	Pavir.Ca00608.1.p|PACid:30204384	1.40476	2.6477373189541	<.0001	19	Abiotic/biotic stress	AT2G38870.1	Serine protease inhibitor, potato inhibitor I-type family protein
D3W	3293	Pavir.J38942.1	30276533	Pavir.J38942.1.p|PACid:30276533	1.44114	2.71535344651734	<.0001	11	Abiotic/biotic stress	AT2G32120.1	heat-shock protein 70T-2
D3W	6681	Pavir.J34849.1	30255001	Pavir.J34849.1.p|PACid:30255001	1.4482	2.72867391806652	<.0001	6	Abiotic/biotic stress	AT3G04720.1	pathogenesis-related 4
D3W	6885	Pavir.Ia01975.1	30210367	Pavir.Ia01975.1.p|PACid:30210367	1.4533	2.73833698815271	<.0001	7	Abiotic/biotic stress	AT5G40020.1	Pathogenesis-related thaumatin superfamily protein
D3W	6382	Pavir.Bb00799.1	30298345	Pavir.Bb00799.1.p|PACid:30298345	1.4687	2.76772384026662	<.0001	4	Abiotic/biotic stress	AT4G11650.1	osmotin 34
D3W	1237	Pavir.Ca00609.1	30204579	Pavir.Ca00609.1.p|PACid:30204579	1.5125	2.85304005173806	<.0001	15	Abiotic/biotic stress	AT2G38870.1	Serine protease inhibitor, potato inhibitor I-type family protein
D3W	5368	Pavir.Ca02660.1	30206509	Pavir.Ca02660.1.p|PACid:30206509	1.5272	2.8822590359262	0.0006	2	Abiotic/biotic stress	AT2G47710.1	Adenine nucleotide alpha hydrolases-like superfamily protein
D3W	2605	Pavir.Ib01026.1	30238031	Pavir.Ib01026.1.p|PACid:30238031	1.529	2.88585737372326	<.0001	4	Abiotic/biotic stress	AT4G27670.1	heat shock protein 21
D3W	1619	Pavir.J19824.1	30189354	Pavir.J19824.1.p|PACid:30189354	1.5381	2.90411785094153	0.0003	2	Abiotic/biotic stress	AT5G59720.1	heat shock protein 18.2
D3W	2490	Pavir.J08073.1	30308630	Pavir.J08073.1.p|PACid:30308630	1.5582	2.94486194059056	0.0001	4	Abiotic/biotic stress	AT4G27670.1	heat shock protein 21
D3W	4686	Pavir.Ab00731.1	30236320	Pavir.Ab00731.1.p|PACid:30236320	1.5665	2.96185291814147	<.0001	8	Abiotic/biotic stress	AT1G52560.1	HSP20-like chaperones superfamily protein
D3W	1752	Pavir.J21349.1	30225604	Pavir.J21349.1.p|PACid:30225604	1.5816	2.99301601828869	<.0001	5	Abiotic/biotic stress	AT1G54050.1	HSP20-like chaperones superfamily protein
D3W	1079	Pavir.J07818.1	30243543	Pavir.J07818.1.p|PACid:30243543	1.5883	3.00694816841776	<.0001	23	Abiotic/biotic stress	AT4G10250.1	HSP20-like chaperones superfamily protein
D3W	5328	Pavir.Hb01772.1	30264897	Pavir.Hb01772.1.p|PACid:30264897	1.6019	3.03542809881319	<.0001	5	Abiotic/biotic stress	AT4G11650.1	osmotin 34
D3W	1815	Pavir.J31919.1	30199244	Pavir.J31919.1.p|PACid:30199244	1.6881	3.222320510692	0.0003	2	Abiotic/biotic stress	AT5G52300.2	CAP160 protein
D3W	993	Pavir.J29514.1	30196199	Pavir.J29514.1.p|PACid:30196199	1.814	3.51615824364715	<.0001	19	Abiotic/biotic stress	AT5G12030.1	heat shock protein 17.6A
D3W	9263	Pavir.J37293.1	30208847	Pavir.J37293.1.p|PACid:30208847	1.8241	3.54086048355838	<.0001	2	Abiotic/biotic stress	AT4G26090.1	NB-ARC domain-containing disease resistance protein
D3W	1950	Pavir.J34564.1	30263851	Pavir.J34564.1.p|PACid:30263851	1.9118	3.76278276144424	<.0001	17	Abiotic/biotic stress	AT3G12500.1	basic chitinase
D3W	4485	Pavir.Eb02336.1	30308702	Pavir.Eb02336.1.p|PACid:30308702	1.9573	3.88334531408126	0.0053	2	Abiotic/biotic stress	AT2G21100.1	Disease resistance-responsive (dirigent-like protein) family protein
D3W	1797	Pavir.Aa00282.1	30253178	Pavir.Aa00282.1.p|PACid:30253178	2.2181	4.65280266271913	<.0001	3	Abiotic/biotic stress	AT1G54050.1	HSP20-like chaperones superfamily protein
D3W	6149	Pavir.Cb00662.1	30269981	Pavir.Cb00662.1.p|PACid:30269981	2.2527	4.76573918764756	<.0001	3	Abiotic/biotic stress	AT5G66400.1	Dehydrin family protein
D3W	4149	Pavir.Ib00193.1	30238328	Pavir.Ib00193.1.p|PACid:30238328	2.3103	4.95986206685153	<.0001	7	Abiotic/biotic stress	AT3G12500.1	basic chitinase
D3W	837	Pavir.Ea00606.1	30226304	Pavir.Ea00606.1.p|PACid:30226304	2.3139	4.97225401328578	<.0001	13	Abiotic/biotic stress	AT5G59720.1	heat shock protein 18.2
D3W	3202	Pavir.J37362.1	30294839	Pavir.J37362.1.p|PACid:30294839	2.3657	5.15402666078576	<.0001	3	Abiotic/biotic stress	AT1G74310.1	heat shock protein 101
D3W	3141	Pavir.Eb03806.1	30312699	Pavir.Eb03806.1.p|PACid:30312699	2.3898	5.24084702940308	<.0001	12	Abiotic/biotic stress	AT4G11650.1	osmotin 34
D3W	4650	Pavir.Bb03197.1	30299608	Pavir.Bb03197.1.p|PACid:30299608	2.705	6.520578659221	<.0001	7	Abiotic/biotic stress	AT4G11650.1	osmotin 34
D3W	912	Pavir.J13075.1	30246880	Pavir.J13075.1.p|PACid:30246880	2.7722	6.83148869491439	<.0001	17	Abiotic/biotic stress	AT5G66400.1	Dehydrin family protein
D3W	7108	Pavir.J36772.1	30203019	Pavir.J36772.1.p|PACid:30203019	2.8044	6.9856773016021	<.0001	8	Abiotic/biotic stress	AT3G04720.1	pathogenesis-related 4
D3W	7394	Pavir.Db00371.1	30262621	Pavir.Db00371.1.p|PACid:30262621	0.9709	1.96006296476327	0.0128	2	Amino acid metabolism	AT4G20930.1	6-phosphogluconate dehydrogenase family protein
D3W	3665	Pavir.J12790.1	30248522	Pavir.J12790.1.p|PACid:30248522	0.97829	1.97012886687929	<.0001	8	Amino acid metabolism	AT5G46180.1	ornithine-delta-aminotransferase
D3W	888	Pavir.Ab03297.1	30235915	Pavir.Ab03297.1.p|PACid:30235915	1.01424	2.01983857814607	<.0001	11	Amino acid metabolism	AT2G33150.1	peroxisomal 3-ketoacyl-CoA thiolase 3
D3W	7392	Pavir.J02344.1	30272577	Pavir.J02344.1.p|PACid:30272577	1.041	2.05765341578715	0.0002	2	Amino acid metabolism	AT3G55610.1	delta 1-pyrroline-5-carboxylate synthase 2
D3W	313	Pavir.Fb00620.1	30278273	Pavir.Fb00620.1.p|PACid:30278273	1.07756	2.11046367785571	<.0001	19	Amino acid metabolism	AT1G11840.6	glyoxalase I homolog
D3W	6074	Pavir.Da02439.1	30193736	Pavir.Da02439.1.p|PACid:30193736	1.0951	2.13627888653262	<.0001	5	Amino acid metabolism	AT5G54080.1	homogentisate 1,2-dioxygenase
D3W	4054	Pavir.Ia01160.1	30214267	Pavir.Ia01160.1.p|PACid:30214267	1.10456	2.15033286214654	<.0001	4	Amino acid metabolism	AT5G46180.1	ornithine-delta-aminotransferase
D3W	322	Pavir.Fa02123.1	30186363	Pavir.Fa02123.1.p|PACid:30186363	1.10676	2.15361445735539	<.0001	14	Amino acid metabolism	AT1G11840.6	glyoxalase I homolog
D3W	7285	Pavir.J17816.1	30285619	Pavir.J17816.1.p|PACid:30285619	1.46692	2.76431112285022	<.0001	2	Amino acid metabolism	AT4G33150.1	lysine-ketoglutarate reductase/saccharopine dehydrogenase bifunctional enzyme
D3W	5705	Pavir.Aa00599.1	30249169	Pavir.Aa00599.1.p|PACid:30249169	1.3202	2.49700723251505	<.0001	5	Ammonia metabolism	AT2G15620.1	nitrite reductase 1
D3W	3082	Pavir.J11076.2	30314416	Pavir.J11076.2.p|PACid:30314416	-1.2011	0.434943527321485	<.0001	2	Cell organization	AT3G03490.1	peroxin 19-1
D3W	3882	Pavir.Hb01246.1	30265856	Pavir.Hb01246.1.p|PACid:30265856	0.982	1.97520172289074	<.0001	6	Cell organization	AT4G22240.1	Plastid-lipid associated protein PAP / fibrillin family protein
D3W	1015	Pavir.J00639.1	30255563	Pavir.J00639.1.p|PACid:30255563	1.72009	3.29456958860567	<.0001	16	Cell organization	AT5G09810.1	actin 7
D3W	2594	Pavir.J16347.1	30307684	Pavir.J16347.1.p|PACid:30307684	1.8729	3.66268085918249	<.0001	8	Cell organization	AT1G01750.1	actin depolymerizing factor 11
D3W	2049	Pavir.J00892.1	30275043	Pavir.J00892.1.p|PACid:30275043	2.1326	4.3850703861205	<.0001	11	Cell organization	AT1G01750.1	actin depolymerizing factor 11
D3W	9139	Pavir.J17983.1	30287358	Pavir.J17983.1.p|PACid:30287358	1.0085	2.01181828307323	<.0001	2	Cell wall synthesis / modification	AT4G28850.1	xyloglucan endotransglucosylase/hydrolase 26
D3W	4347	Pavir.Ib02222.1	30238687	Pavir.Ib02222.1.p|PACid:30238687	1.4028	2.64414262887461	<.0001	4	Cell wall synthesis / modification	AT1G65680.1	expansin B2
D3W	5334	Pavir.Hb02012.1	30266819	Pavir.Hb02012.1.p|PACid:30266819	1.496	2.82059592096878	<.0001	3	Cell wall synthesis / modification	AT3G10740.1	alpha-L-arabinofuranosidase 1
D3W	4269	Pavir.Ia01549.1	30215484	Pavir.Ia01549.1.p|PACid:30215484	1.6769	3.19740168673228	<.0001	6	Cell wall synthesis / modification	AT1G65680.1	expansin B2
D3W	7985	Pavir.J23702.1	30198664	Pavir.J23702.1.p|PACid:30198664	-1.1267	0.45796206384244	<.0001	2	Development	N	N
D3W	3616	Pavir.Ia01197.1	30210143	Pavir.Ia01197.1.p|PACid:30210143	-0.95299	0.5165607743561	<.0001	13	Development	AT5G58230.1	Transducin/WD40 repeat-like superfamily protein
D3W	5145	Pavir.Ha01893.1	30317160	Pavir.Ha01893.1.p|PACid:30317160	-0.9497	0.517740111757342	<.0001	3	Development	AT2G19540.1	Transducin family protein / WD-40 repeat family protein
D3W	4780	Pavir.Da00112.1	30193365	Pavir.Da00112.1.p|PACid:30193365	1.0586	2.0829092728739	<.0001	8	Development	AT1G15270.1	Translation machinery associated TMA7
D3W	5493	Pavir.Ia02723.1	30214198	Pavir.Ia02723.1.p|PACid:30214198	1.0787	2.11213199953331	<.0001	8	Development	AT2G03440.1	nodulin-related protein 1
D3W	6068	Pavir.Ca01448.1	30204925	Pavir.Ca01448.1.p|PACid:30204925	1.159	2.23302592396514	<.0001	4	Development	AT3G51810.1	Stress induced protein
D3W	4904	Pavir.J24821.1	30277014	Pavir.J24821.1.p|PACid:30277014	1.2105	2.31417826191367	<.0001	8	Development	AT1G52690.1	Late embryogenesis abundant protein (LEA) family protein
D3W	6284	Pavir.Eb02811.1	30309247	Pavir.Eb02811.1.p|PACid:30309247	1.2677	2.40777402786857	0.0413	2	Development	AT3G15670.1	Late embryogenesis abundant protein (LEA) family protein
D3W	5698	Pavir.J19751.1	30274240	Pavir.J19751.1.p|PACid:30274240	1.308	2.47598058167489	<.0001	5	Development	AT1G28330.1	dormancy-associated protein-like 1
D3W	6166	Pavir.Aa00332.1	30252986	Pavir.Aa00332.1.p|PACid:30252986	1.4314	2.69708315005043	<.0001	7	Development	AT3G03270.2	Adenine nucleotide alpha hydrolases-like superfamily protein
D3W	3689	Pavir.Ia03678.1	30215378	Pavir.Ia03678.1.p|PACid:30215378	1.527	2.88185949767584	<.0001	9	Development	AT3G53040.1	late embryogenesis abundant protein, putative / LEA protein, putative
D3W	3342	Pavir.Bb02409.1	30298298	Pavir.Bb02409.1.p|PACid:30298298	1.8127	3.51299129099335	<.0001	10	Development	AT2G33690.1	Late embryogenesis abundant protein, group 6
D3W	9226	Pavir.Ga01132.1	30306045	Pavir.Ga01132.1.p|PACid:30306045	1.8298	3.55487787978974	0.0004	2	Development	AT2G35300.1	Late embryogenesis abundant protein, group 1 protein
D3W	7369	Pavir.Eb02512.1	30308767	Pavir.Eb02512.1.p|PACid:30308767	1.838	3.57514064942715	<.0001	2	Development	AT1G01470.1	Late embryogenesis abundant protein
D3W	343	Pavir.Ca01780.1	30206225	Pavir.Ca01780.1.p|PACid:30206225	1.9685	3.91361001265133	<.0001	25	Development	AT3G15670.1	Late embryogenesis abundant protein (LEA) family protein
D3W	5454	Pavir.Fb00948.1	30279736	Pavir.Fb00948.1.p|PACid:30279736	2.0442	4.12444500503427	<.0001	12	Development	AT3G22490.1	Seed maturation protein
D3W	440	Pavir.J00158.1	30282759	Pavir.J00158.1.p|PACid:30282759	2.13679	4.39782439935301	<.0001	46	Development	AT3G15670.1	Late embryogenesis abundant protein (LEA) family protein
D3W	7281	Pavir.Fa01222.1	30186751	Pavir.Fa01222.1.p|PACid:30186751	2.3272	5.01830445458179	<.0001	5	Development	AT5G06760.1	Late Embryogenesis Abundant 4-5
D3W	8972	Pavir.J00999.1	30308562	Pavir.J00999.1.p|PACid:30308562	2.5879	6.01222916184971	<.0001	7	Development	AT2G36640.1	embryonic cell protein 63
D3W	757	Pavir.Ib00038.1	30238568	Pavir.Ib00038.1.p|PACid:30238568	1.06356	2.09008265983796	<.0001	64	DNA synthesis	AT3G53730.1	Histone superfamily protein
D3W	6705	Pavir.J24812.1	30294359	Pavir.J24812.1.p|PACid:30294359	1.2123	2.31706738291396	<.0001	3	DNA synthesis	AT4G40030.2	Histone superfamily protein
D3W	4380	Pavir.Fb02055.1	30278309	Pavir.Fb02055.1.p|PACid:30278309	1.8577	3.62429402395	<.0001	4	DNA synthesis	AT5G59910.1	Histone superfamily protein
D3W	7272	Pavir.J24019.1	30257531	Pavir.J24019.1.p|PACid:30257531	-2.1602	0.223725250676759	<.0001	4	Functional enzyme	AT4G33355.1	Bifunctional inhibitor/lipid-transfer protein/seed storage 2S albumin superfamily protein
D3W	3275	Pavir.Bb00105.1	30297002	Pavir.Bb00105.1.p|PACid:30297002	-1.22931	0.426521390158054	<.0001	17	Functional enzyme	AT3G01190.1	Peroxidase superfamily protein
D3W	3374	Pavir.Hb00130.1	30265027	Pavir.Hb00130.1.p|PACid:30265027	-1.0033	0.498857614188651	<.0001	13	Functional enzyme	AT4G03140.1	NAD(P)-binding Rossmann-fold superfamily protein
D3W	3966	Pavir.Ia03296.1	30210796	Pavir.Ia03296.1.p|PACid:30210796	-0.9679	0.511249701205728	0.0005	7	Functional enzyme	AT5G42180.1	Peroxidase superfamily protein
D3W	5404	Pavir.Ib02422.1	30240684	Pavir.Ib02422.1.p|PACid:30240684	0.9617	1.9476035022127	<.0001	8	Functional enzyme	AT3G03190.1	glutathione S-transferase F11
D3W	7904	Pavir.Ga00397.1	30304273	Pavir.Ga00397.1.p|PACid:30304273	0.9643	1.95111660416625	<.0001	2	Functional enzyme	AT1G72230.1	Cupredoxin superfamily protein
D3W	2412	Pavir.Ca00776.1	30206984	Pavir.Ca00776.1.p|PACid:30206984	0.96673	1.95440573207075	<.0001	9	Functional enzyme	AT4G33420.1	Peroxidase superfamily protein
D3W	4059	Pavir.Db01426.1	30261195	Pavir.Db01426.1.p|PACid:30261195	1.0022	2.00305217416952	<.0001	6	Functional enzyme	AT2G16890.2	UDP-Glycosyltransferase superfamily protein
D3W	4336	Pavir.Eb03999.1	30313144	Pavir.Eb03999.1.p|PACid:30313144	1.0037	2.00513587216441	<.0001	8	Functional enzyme	AT1G71695.1	Peroxidase superfamily protein
D3W	1162	Pavir.Eb00061.1	30309691	Pavir.Eb00061.1.p|PACid:30309691	1.00491	2.00681830127372	<.0001	39	Functional enzyme	AT5G57850.1	D-aminoacid aminotransferase-like PLP-dependent enzymes superfamily protein
D3W	1194	Pavir.Bb02933.1	30300552	Pavir.Bb02933.1.p|PACid:30300552	1.00905	2.01258539668155	<.0001	38	Functional enzyme	AT5G55180.1	O-Glycosyl hydrolases family 17 protein
D3W	2537	Pavir.Da01661.1	30191709	Pavir.Da01661.1.p|PACid:30191709	1.0093	2.01293418137391	<.0001	3	Functional enzyme	AT3G21770.1	Peroxidase superfamily protein
D3W	8100	Pavir.Eb02854.1	30311461	Pavir.Eb02854.1.p|PACid:30311461	1.0124	2.01726413663981	<.0001	2	Functional enzyme	AT1G10360.1	glutathione S-transferase TAU 18
D3W	7953	Pavir.Ba03788.1	30292237	Pavir.Ba03788.1.p|PACid:30292237	1.01271	2.01769764410735	<.0001	3	Functional enzyme	AT5G67290.1	FAD-dependent oxidoreductase family protein
D3W	1401	Pavir.Ca00811.1	30204135	Pavir.Ca00811.1.p|PACid:30204135	1.0261	2.03651155486136	<.0001	19	Functional enzyme	AT4G25150.1	HAD superfamily, subfamily IIIB acid phosphatase
D3W	8526	Pavir.Ib02543.1	30241255	Pavir.Ib02543.1.p|PACid:30241255	1.0275	2.03848875719015	<.0001	4	Functional enzyme	AT1G10370.1	Glutathione S-transferase family protein
D3W	4293	Pavir.Ia04860.1	30210096	Pavir.Ia04860.1.p|PACid:30210096	1.0549	2.07757419513475	<.0001	5	Functional enzyme	AT2G47730.1	glutathione S-transferase phi 8
D3W	3504	Pavir.Ab01247.1	30236234	Pavir.Ab01247.1.p|PACid:30236234	1.06397	2.09067672555798	<.0001	6	Functional enzyme	AT2G15480.2	UDP-glucosyl transferase 73B5
D3W	3291	Pavir.Ia04103.1	30213913	Pavir.Ia04103.1.p|PACid:30213913	1.06629	2.09404145053491	<.0001	7	Functional enzyme	AT2G02850.1	plantacyanin
D3W	3262	Pavir.Bb02402.1	30297818	Pavir.Bb02402.1.p|PACid:30297818	1.07818	2.11137084717807	<.0001	12	Functional enzyme	AT2G22420.1	Peroxidase superfamily protein
D3W	4644	Pavir.J34940.1	30244118	Pavir.J34940.1.p|PACid:30244118	1.0996	2.14295269005185	0.0002	3	Functional enzyme	AT3G55040.1	glutathione transferase lambda 2
D3W	6621	Pavir.J37309.1	30271745	Pavir.J37309.1.p|PACid:30271745	1.1012	2.14533061899621	<.0001	3	Functional enzyme	AT4G37560.1	Acetamidase/Formamidase family protein
D3W	6179	Pavir.Ea02497.1	30228113	Pavir.Ea02497.1.p|PACid:30228113	1.1038	2.14920038262112	<.0001	4	Functional enzyme	AT1G10360.1	glutathione S-transferase TAU 18
D3W	6364	Pavir.Ba00546.1	30290644	Pavir.Ba00546.1.p|PACid:30290644	1.1046	2.15039248285948	0.0104	3	Functional enzyme	AT3G13560.1	O-Glycosyl hydrolases family 17 protein
D3W	8345	Pavir.Ab02462.1	30232733	Pavir.Ab02462.1.p|PACid:30232733	1.108	2.15546629008734	<.0001	2	Functional enzyme	AT2G32300.1	uclacyanin 1
D3W	2332	Pavir.Ga00910.1	30305132	Pavir.Ga00910.1.p|PACid:30305132	1.1161	2.16760217521616	<.0001	5	Functional enzyme	AT5G38010.1	UDP-Glycosyltransferase superfamily protein
D3W	8264	Pavir.Aa00537.1	30251268	Pavir.Aa00537.1.p|PACid:30251268	1.11896	2.17190349385845	<.0001	3	Functional enzyme	AT2G32300.1	uclacyanin 1
D3W	6420	Pavir.Ib02646.1	30238174	Pavir.Ib02646.1.p|PACid:30238174	1.12954	2.18788968769354	<.0001	4	Functional enzyme	AT5G06720.1	peroxidase 2
D3W	2774	Pavir.Ib01707.1	30243079	Pavir.Ib01707.1.p|PACid:30243079	1.13213	2.19182102709071	<.0001	14	Functional enzyme	AT5G13690.1	alpha-N-acetylglucosaminidase family / NAGLU family
D3W	2084	Pavir.Ca00381.1	30203810	Pavir.Ca00381.1.p|PACid:30203810	1.17775	2.26223687594618	<.0001	15	Functional enzyme	AT5G16970.1	alkenal reductase
D3W	7456	Pavir.Eb03869.1	30309432	Pavir.Eb03869.1.p|PACid:30309432	1.1808	2.26702452743997	<.0001	4	Functional enzyme	AT3G57240.1	beta-1,3-glucanase 3
D3W	1073	Pavir.Bb03601.1	30301014	Pavir.Bb03601.1.p|PACid:30301014	1.27328	2.41710475587673	<.0001	28	Functional enzyme	AT5G05340.1	Peroxidase superfamily protein
D3W	1326	Pavir.Ib00332.1	30240898	Pavir.Ib00332.1.p|PACid:30240898	1.284	2.43513203732597	<.0001	2	Functional enzyme	AT2G30860.1	glutathione S-transferase PHI 9
D3W	5907	Pavir.Ia00797.1	30210919	Pavir.Ia00797.1.p|PACid:30210919	1.2876	2.44121608268049	<.0001	6	Functional enzyme	AT2G02850.1	plantacyanin
D3W	2811	Pavir.Ca02020.1	30206257	Pavir.Ca02020.1.p|PACid:30206257	1.2901	2.44545005519075	<.0001	5	Functional enzyme	AT2G32810.1	beta galactosidase 9
D3W	4970	Pavir.J18192.1	30258664	Pavir.J18192.1.p|PACid:30258664	1.3756	2.59475801445562	<.0001	5	Functional enzyme	AT2G32300.1	uclacyanin 1
D3W	2824	Pavir.Cb00980.1	30269537	Pavir.Cb00980.1.p|PACid:30269537	1.3782	2.5994384586216	<.0001	6	Functional enzyme	AT2G32810.1	beta galactosidase 9
D3W	5017	Pavir.Da00805.1	30193261	Pavir.Da00805.1.p|PACid:30193261	1.3923	2.62496829924773	<.0001	5	Functional enzyme	AT4G20860.1	FAD-binding Berberine family protein
D3W	813	Pavir.Ea01261.1	30231507	Pavir.Ea01261.1.p|PACid:30231507	1.39992	2.63886948749298	<.0001	12	Functional enzyme	AT1G71695.1	Peroxidase superfamily protein
D3W	7963	Pavir.Ea03391.1	30231527	Pavir.Ea03391.1.p|PACid:30231527	1.4133	2.66345701920879	<.0001	5	Functional enzyme	AT5G05960.1	Bifunctional inhibitor/lipid-transfer protein/seed storage 2S albumin superfamily protein
D3W	1040	Pavir.J33952.1	30281345	Pavir.J33952.1.p|PACid:30281345	1.4414	2.71584284690774	<.0001	2	Functional enzyme	AT2G32520.1	alpha/beta-Hydrolases superfamily protein
D3W	6485	Pavir.J18194.1	30255395	Pavir.J18194.1.p|PACid:30255395	1.4792	2.78794094126729	<.0001	5	Functional enzyme	AT5G46940.1	Plant invertase/pectin methylesterase inhibitor superfamily protein
D3W	7758	Pavir.Gb01868.1	30222408	Pavir.Gb01868.1.p|PACid:30222408	1.5143	2.85660191128181	<.0001	4	Functional enzyme	AT5G05960.1	Bifunctional inhibitor/lipid-transfer protein/seed storage 2S albumin superfamily protein
D3W	3429	Pavir.J24327.1	30256877	Pavir.J24327.1.p|PACid:30256877	1.5313	2.89046178799014	<.0001	10	Functional enzyme	AT1G10370.1	Glutathione S-transferase family protein
D3W	5765	Pavir.Ia02811.1	30212405	Pavir.Ia02811.1.p|PACid:30212405	1.662	3.1645492047418	<.0001	2	Functional enzyme	AT5G06720.1	peroxidase 2
D3W	5759	Pavir.Ab01476.1	30234312	Pavir.Ab01476.1.p|PACid:30234312	1.6675	3.17663647127744	<.0001	7	Functional enzyme	AT2G45550.1	cytochrome P450, family 76, subfamily C, polypeptide 4
D3W	4529	Pavir.Da00087.1	30194507	Pavir.Da00087.1.p|PACid:30194507	1.6806	3.20561240989294	<.0001	9	Functional enzyme	AT3G20570.1	early nodulin-like protein 9
D3W	687	Pavir.Ea01477.2	30231125	Pavir.Ea01477.2.p|PACid:30231125	1.68207	3.20888035747888	<.0001	37	Functional enzyme	AT1G44970.1	Peroxidase superfamily protein
D3W	4294	Pavir.Fa01764.1	30187362	Pavir.Fa01764.1.p|PACid:30187362	1.74	3.34035167771348	<.0001	6	Functional enzyme	AT5G58090.1	O-Glycosyl hydrolases family 17 protein
D3W	5030	Pavir.J15786.1	30195529	Pavir.J15786.1.p|PACid:30195529	1.9375	3.83041312279429	<.0001	4	Functional enzyme	AT1G71695.1	Peroxidase superfamily protein
D3W	6168	Pavir.J00683.1	30255035	Pavir.J00683.1.p|PACid:30255035	2.2466	4.74563123983949	<.0001	7	Functional enzyme	AT5G05960.1	Bifunctional inhibitor/lipid-transfer protein/seed storage 2S albumin superfamily protein
D3W	2822	Pavir.J26690.1	30201144	Pavir.J26690.1.p|PACid:30201144	0.994	1.99169950618892	<.0001	3	Glycolysis	AT5G42740.1	Sugar isomerase (SIS) family protein
D3W	9193	Pavir.Ga01407.1	30304106	Pavir.Ga01407.1.p|PACid:30304106	1.55752	2.94347423618575	<.0001	2	Glycolysis	AT5G47810.1	phosphofructokinase 2
D3W	1677	Pavir.Ib01540.1	30237822	Pavir.Ib01540.1.p|PACid:30237822	1.8183	3.52665390244914	<.0001	6	Glycolysis	AT3G08590.1	Phosphoglycerate mutase, 2,3-bisphosphoglycerate-independent
D3W	3312	Pavir.Cb00901.1	30269979	Pavir.Cb00901.1.p|PACid:30269979	-2.2277	0.213498819813706	<.0001	8	Lipids metabolism	AT4G25050.1	acyl carrier protein 4
D3W	7363	Pavir.Ia00082.1	30209288	Pavir.Ia00082.1.p|PACid:30209288	-1.9737	0.254599236859964	0.0003	2	Lipids metabolism	AT5G27200.1	acyl carrier protein 5
D3W	2147	Pavir.J01373.1	30219389	Pavir.J01373.1.p|PACid:30219389	-1.6856	0.310873597741391	<.0001	9	Lipids metabolism	AT1G54580.1	acyl carrier protein 2
D3W	2329	Pavir.Bb02686.1	30297191	Pavir.Bb02686.1.p|PACid:30297191	-1.4389	0.36884843000959	<.0001	8	Lipids metabolism	AT1G54580.1	acyl carrier protein 2
D3W	4210	Pavir.J04109.1	30256957	Pavir.J04109.1.p|PACid:30256957	-1.3775	0.38488517296422	<.0001	8	Lipids metabolism	AT1G54580.1	acyl carrier protein 2
D3W	4072	Pavir.Fb02310.1	30278297	Pavir.Fb02310.1.p|PACid:30278297	-1.2748	0.413282448218785	<.0001	8	Lipids metabolism	AT1G54580.1	acyl carrier protein 2
D3W	2795	Pavir.Eb03247.1	30313448	Pavir.Eb03247.1.p|PACid:30313448	0.9626	1.94881885955173	<.0001	6	Lipids metabolism	AT5G08030.1	PLC-like phosphodiesterases superfamily protein
D3W	5745	Pavir.Ab02053.1	30235451	Pavir.Ab02053.1.p|PACid:30235451	1.8004	3.48316785850921	<.0001	3	Lipids metabolism	AT1G47480.1	alpha/beta-Hydrolases superfamily protein
D3W	5390	Pavir.Aa01512.1	30252328	Pavir.Aa01512.1.p|PACid:30252328	1.8865	3.69737147906938	<.0001	4	Lipids metabolism	AT1G47480.1	alpha/beta-Hydrolases superfamily protein
D3W	1633	Pavir.Fb00791.1	30280037	Pavir.Fb00791.1.p|PACid:30280037	0.973	1.96291812770696	<.0001	15	Major CHO metabolism	AT5G48300.1	ADP glucose pyrophosphorylase 1
D3W	6482	Pavir.J01866.1	30284124	Pavir.J01866.1.p|PACid:30284124	0.9751	1.96577744967798	0.0001	4	Major CHO metabolism	AT1G73370.1	sucrose synthase 6
D3W	4783	Pavir.Ia03415.1	30214719	Pavir.Ia03415.1.p|PACid:30214719	1.2435	2.36772249140878	<.0001	5	Major CHO metabolism	AT4G02280.1	sucrose synthase 3
D3W	4103	Pavir.J01199.1	30263609	Pavir.J01199.1.p|PACid:30263609	1.38926	2.61944287508705	<.0001	11	Major CHO metabolism	AT5G03650.1	starch branching enzyme 2.2
D3W	988	Pavir.J27092.1	30208100	Pavir.J27092.1.p|PACid:30208100	0.98645	1.98130364826077	<.0001	17	Metal binding	AT4G14030.1	selenium-binding protein 1
D3W	8373	Pavir.Eb00738.1	30313756	Pavir.Eb00738.1.p|PACid:30313756	1.2826	2.43277011665403	0.0066	2	Metal binding	AT3G09390.1	metallothionein 2A
D3W	7042	Pavir.Ea01371.1	30230510	Pavir.Ea01371.1.p|PACid:30230510	2.8775	7.34875574177841	<.0001	2	Metal binding	AT1G71050.1	Heavy metal transport/detoxification superfamily protein
D3W	5876	Pavir.Aa00017.1	30250799	Pavir.Aa00017.1.p|PACid:30250799	0.96278	1.94906202201431	<.0001	4	Minor CHO metabolism	AT5G13000.1	glucan synthase-like 12
D3W	6880	Pavir.J15860.1	30275456	Pavir.J15860.1.p|PACid:30275456	1.5742	2.97770327904795	<.0001	7	Minor CHO metabolism	AT2G37770.2	NAD(P)-linked oxidoreductase superfamily protein
D3W	3560	Pavir.Ba00494.1	30290691	Pavir.Ba00494.1.p|PACid:30290691	-1.7293	0.301598257814448	<.0001	4	Mitochondrial electron transport / ATP synthesis	AT1G22450.1	cytochrome C oxidase 6B
D3W	6202	Pavir.J10328.1	30314966	Pavir.J10328.1.p|PACid:30314966	1.3728	2.58972696043465	<.0001	5	Mitochondrial electron transport / ATP synthesis	AT1G15120.2	Ubiquinol-cytochrome C reductase hinge protein
D3W	635	Pavir.J02762.1	30202502	Pavir.J02762.1.p|PACid:30202502	1.4591	2.74936795620422	0.0005	2	Mitochondrial electron transport / ATP synthesis	AT1G22840.1	CYTOCHROME C-1
D3W	8334	Pavir.Ib00918.1	30239390	Pavir.Ib00918.1.p|PACid:30239390	1.4808	2.79103458187362	<.0001	3	Mitochondrial electron transport / ATP synthesis	AT1G69750.1	cytochrome c oxidase 19-2
D3W	474	Pavir.Ga02521.1	30303335	Pavir.Ga02521.1.p|PACid:30303335	0.9804	1.97301236834268	0.019	3	Phyto-hormone metabolism	AT1G60710.1	NAD(P)-linked oxidoreductase superfamily protein
D3W	1566	Pavir.Ib03775.1	30239410	Pavir.Ib03775.1.p|PACid:30239410	0.98416	1.97816120569501	<.0001	33	Phyto-hormone metabolism	AT2G33830.2	Dormancy/auxin associated family protein
D3W	1209	Pavir.Fa01472.1	30186898	Pavir.Fa01472.1.p|PACid:30186898	0.99194	1.98885762136324	<.0001	10	Phyto-hormone metabolism	AT2G42680.1	multiprotein bridging factor 1A
D3W	2386	Pavir.Ca02189.1	30206971	Pavir.Ca02189.1.p|PACid:30206971	1.2968	2.45683334786071	<.0001	10	Phyto-hormone metabolism	AT5G13200.1	GRAM domain family protein
D3W	944	Pavir.Cb00761.1	30268661	Pavir.Cb00761.1.p|PACid:30268661	1.3134	2.48526552997146	<.0001	20	Phyto-hormone metabolism	AT5G13200.1	GRAM domain family protein
D3W	1418	Pavir.Fb01387.1	30279215	Pavir.Fb01387.1.p|PACid:30279215	1.4841	2.79742606155566	<.0001	4	Phyto-hormone metabolism	AT2G42680.1	multiprotein bridging factor 1A
D3W	4204	Pavir.J01160.1	30306248	Pavir.J01160.1.p|PACid:30306248	1.717	3.2875207491794	<.0001	10	Phyto-hormone metabolism	AT3G22850.1	Aluminium induced protein with YGL and LRDR motifs
D3W	8504	Pavir.Ea00295.1	30226575	Pavir.Ea00295.1.p|PACid:30226575	1.78405	3.44391610832437	<.0001	4	Phyto-hormone metabolism	AT1G03400.1	2-oxoglutarate (2OG) and Fe(II)-dependent oxygenase superfamily protein
D3W	262	Pavir.J00130.1	30200135	Pavir.J00130.1.p|PACid:30200135	1.8068	3.49865400957046	<.0001	5	Phyto-hormone metabolism	AT1G60730.1	NAD(P)-linked oxidoreductase superfamily protein
D3W	4745	Pavir.Ia01989.1	30210086	Pavir.Ia01989.1.p|PACid:30210086	-1.25367	0.419380009633557	<.0001	4	Protein degradation	AT5G41340.1	ubiquitin conjugating enzyme 4
D3W	3404	Pavir.Ab02469.1	30236407	Pavir.Ab02469.1.p|PACid:30236407	-0.9519	0.516951199208779	<.0001	7	Protein degradation	AT4G17510.1	ubiquitin C-terminal hydrolase 3
D3W	7118	Pavir.Ia03933.1	30213731	Pavir.Ia03933.1.p|PACid:30213731	0.9636	1.95017014611579	0.0001	2	Protein degradation	AT4G34980.1	subtilisin-like serine protease 2
D3W	2686	Pavir.J13031.1	30259463	Pavir.J13031.1.p|PACid:30259463	1.3399	2.53133772289891	<.0001	10	Protein degradation	AT1G15000.1	serine carboxypeptidase-like 50
D3W	2648	Pavir.Da00795.1	30194578	Pavir.Da00795.1.p|PACid:30194578	1.3746	2.59296008843933	<.0001	11	Protein degradation	AT1G03230.1	Eukaryotic aspartyl protease family protein
D3W	1867	Pavir.Db01460.1	30261745	Pavir.Db01460.1.p|PACid:30261745	1.40653	2.65098774330504	<.0001	15	Protein degradation	AT1G03230.1	Eukaryotic aspartyl protease family protein
D3W	3067	Pavir.J36542.1	30207798	Pavir.J36542.1.p|PACid:30207798	1.6693	3.18060232269455	0.0007	2	Protein degradation	AT1G03230.1	Eukaryotic aspartyl protease family protein
D3W	2661	Pavir.Gb02161.1	30221760	Pavir.Gb02161.1.p|PACid:30221760	1.7905	3.45934763602896	<.0001	4	Protein degradation	AT1G03230.1	Eukaryotic aspartyl protease family protein
D3W	870	Pavir.Ba00424.1	30292203	Pavir.Ba00424.1.p|PACid:30292203	-1.5918	0.331757273285284	<.0001	2	Protein synthesis	AT1G30230.1	Glutathione S-transferase, C-terminal-like;Translation elongation factor EF1B/ribosomal protein S6
D3W	853	Pavir.Bb03322.1	30300232	Pavir.Bb03322.1.p|PACid:30300232	-1.3696	0.386998532288818	<.0001	4	Protein synthesis	AT1G30230.1	Glutathione S-transferase, C-terminal-like;Translation elongation factor EF1B/ribosomal protein S6
D3W	3625	Pavir.Fa00975.1	30187167	Pavir.Fa00975.1.p|PACid:30187167	-1.237	0.424253950852948	<.0001	11	Protein synthesis	AT3G10090.1	Nucleic acid-binding, OB-fold-like protein
D3W	2113	Pavir.Ba01470.1	30290050	Pavir.Ba01470.1.p|PACid:30290050	-1.09585	0.467860390803574	<.0001	5	Protein synthesis	AT3G22660.1	rRNA processing protein-related
D3W	6204	Pavir.Ib00250.1	30241046	Pavir.Ib00250.1.p|PACid:30241046	-1.0728	0.47539544985016	0.0003	2	Protein synthesis	AT1G64880.1	Ribosomal protein S5 family protein
D3W	6563	Pavir.Ia04764.1	30213378	Pavir.Ia04764.1.p|PACid:30213378	-1.07167	0.475767952201283	<.0001	3	Protein synthesis	AT2G40780.1	Nucleic acid-binding, OB-fold-like protein
D3W	8217	Pavir.Ca00896.1	30206505	Pavir.Ca00896.1.p|PACid:30206505	-1.0594	0.47983157451362	<.0001	3	Protein synthesis	AT4G30930.1	Ribosomal protein L21
D3W	3091	Pavir.Ib03607.1	30238969	Pavir.Ib03607.1.p|PACid:30238969	-1.05761	0.480427287083858	<.0001	20	Protein synthesis	AT1G07210.1	Ribosomal protein S18
D3W	3989	Pavir.Fb00053.1	30278567	Pavir.Fb00053.1.p|PACid:30278567	-1.03263	0.488818231633261	<.0001	14	Protein synthesis	AT5G24510.1	60S acidic ribosomal protein family
D3W	2224	Pavir.J13365.1	30284508	Pavir.J13365.1.p|PACid:30284508	-1.0115	0.496030246566124	<.0001	2	Protein synthesis	AT3G22660.1	rRNA processing protein-related
D3W	6693	Pavir.Ca01190.1	30203983	Pavir.Ca01190.1.p|PACid:30203983	1.0028	2.0038853934008	<.0001	5	Protein synthesis	AT5G44710.1	N
D3W	3538	Pavir.Gb01843.1	30224099	Pavir.Gb01843.1.p|PACid:30224099	1.30798	2.47594625753362	<.0001	23	Protein synthesis	AT5G52650.1	RNA binding Plectin/S10 domain-containing protein
D3W	1942	Pavir.Ca00908.1	30204589	Pavir.Ca00908.1.p|PACid:30204589	-1.38	0.384218795322003	<.0001	5	Protein targeting & vesicle tansport	AT1G79830.1	golgin candidate 5
D3W	886	Pavir.J37543.1	30202848	Pavir.J37543.1.p|PACid:30202848	-1.2495	0.42059394912532	<.0001	3	Protein targeting & vesicle tansport	AT4G09160.1	SEC14 cytosolic factor family protein / phosphoglyceride transfer family protein
D3W	847	Pavir.Ea03681.1	30229467	Pavir.Ea03681.1.p|PACid:30229467	-1.0727	0.475428402893783	<.0001	11	Protein targeting & vesicle tansport	AT4G09160.1	SEC14 cytosolic factor family protein / phosphoglyceride transfer family protein
D3W	7346	Pavir.Gb01723.1	30222273	Pavir.Gb01723.1.p|PACid:30222273	-1.0661	0.477608361754914	0.0012	2	Protein targeting & vesicle tansport	AT1G12830.1	N
D3W	5572	Pavir.Ab02710.1	30235339	Pavir.Ab02710.1.p|PACid:30235339	1.2249	2.33739247580688	0.0011	2	Protein targeting & vesicle tansport	AT1G61570.1	translocase of the inner mitochondrial membrane 13
D3W	3186	Pavir.J08185.1	30185137	Pavir.J08185.1.p|PACid:30185137	1.88202	3.68590784197321	<.0001	20	Protein targeting & vesicle tansport	AT4G16160.2	Mitochondrial import inner membrane translocase subunit Tim17/Tim22/Tim23 family protein
D3W	4612	Pavir.Ia03535.1	30211090	Pavir.Ia03535.1.p|PACid:30211090	2.0226	4.06315387032825	0.017	2	Protein targeting & vesicle tansport	AT4G16160.2	Mitochondrial import inner membrane translocase subunit Tim17/Tim22/Tim23 family protein
D3W	3974	Pavir.J11658.1	30207612	Pavir.J11658.1.p|PACid:30207612	2.1086	4.31272581950059	<.0001	6	Protein targeting & vesicle tansport	AT4G16160.2	Mitochondrial import inner membrane translocase subunit Tim17/Tim22/Tim23 family protein
D3W	4890	Pavir.Aa03533.1	30251116	Pavir.Aa03533.1.p|PACid:30251116	-1.1016	0.465999399210659	0.0004	3	Redox balance	AT5G60640.1	PDI-like 1-4
D3W	964	Pavir.Gb01642.1	30222355	Pavir.Gb01642.1.p|PACid:30222355	1.1022	2.14681816435051	<.0001	3	Redox balance	AT4G08390.1	stromal ascorbate peroxidase
D3W	6623	Pavir.Ba03098.1	30289391	Pavir.Ba03098.1.p|PACid:30289391	1.1166	2.16835353907824	<.0001	5	Redox balance	AT4G39830.1	Cupredoxin superfamily protein
D3W	7457	Pavir.J14234.1	30236731	Pavir.J14234.1.p|PACid:30236731	1.2388	2.36002149554463	<.0001	2	Redox balance	AT3G26060.1	Thioredoxin superfamily protein
D3W	3800	Pavir.J14586.1	30254928	Pavir.J14586.1.p|PACid:30254928	1.2987	2.46007107891122	<.0001	3	Redox balance	AT1G20630.1	catalase 1
D3W	7738	Pavir.Ab02318.1	30235492	Pavir.Ab02318.1.p|PACid:30235492	1.805	3.49429158366678	<.0001	2	Redox balance	AT5G40370.1	Glutaredoxin family protein
D3W	5423	Pavir.Ca00875.1	30206961	Pavir.Ca00875.1.p|PACid:30206961	-1.3536	0.391314371210239	<.0001	3	Regulation of transcription	AT5G38110.1	anti- silencing function 1b
D3W	4483	Pavir.J14687.1	30245863	Pavir.J14687.1.p|PACid:30245863	-1.0628	0.478702086698329	0.0024	2	Regulation of transcription	AT4G39680.1	SAP domain-containing protein
D3W	7313	Pavir.Ea00508.1	30230543	Pavir.Ea00508.1.p|PACid:30230543	-0.9962	0.501318715602258	0.0001	3	Regulation of transcription	AT1G32130.1	Transcription elongation factor (TFIIS) family protein
D3W	4222	Pavir.Ab00438.1	30236096	Pavir.Ab00438.1.p|PACid:30236096	-0.9661	0.511887967614351	<.0001	2	Regulation of transcription	AT3G21810.1	Zinc finger C-x8-C-x5-C-x3-H type family protein
D3W	4548	Pavir.Ab01937.1	30233629	Pavir.Ab01937.1.p|PACid:30233629	0.9616	1.94746850930361	<.0001	3	Regulation of transcription	AT3G57040.1	response regulator 9
D3W	6852	Pavir.Fa00030.1	30186406	Pavir.Fa00030.1.p|PACid:30186406	1.0767	2.10920599147525	<.0001	3	Regulation of transcription	AT2G36930.1	zinc finger (C2H2 type) family protein
D3W	1793	Pavir.Gb00738.1	30224391	Pavir.Gb00738.1.p|PACid:30224391	1.1222	2.17678662912863	<.0001	14	Regulation of transcription	AT3G61260.1	Remorin family protein
D3W	5961	Pavir.Ia04404.1	30211920	Pavir.Ia04404.1.p|PACid:30211920	2.0734	4.20877387495901	0.0004	3	Regulation of transcription	AT5G42290.1	transcription activator-related
D3W	8858	Pavir.J11012.1	30288147	Pavir.J11012.1.p|PACid:30288147	-1.2655	0.415955183290742	0.0043	2	RNA processing	AT2G37340.1	arginine/serine-rich zinc knuckle-containing protein 33
D3W	5893	Pavir.J00644.1	30255571	Pavir.J00644.1.p|PACid:30255571	-0.96355	0.512793542630831	<.0001	7	RNA processing	AT1G76860.1	Small nuclear ribonucleoprotein family protein
D3W	8351	Pavir.Ia00088.1	30209179	Pavir.Ia00088.1.p|PACid:30209179	1.1832	2.2707989820553	0.0011	2	RNA processing	AT1G24450.1	Ribonuclease III family protein
D3W	5470	Pavir.Ba01215.1	30290531	Pavir.Ba01215.1.p|PACid:30290531	1.5577	2.94384150605298	<.0001	7	RNA processing	AT1G14220.1	Ribonuclease T2 family protein
D3W	4870	Pavir.J06283.1	30274079	Pavir.J06283.1.p|PACid:30274079	-1.2439	0.422229709430871	0.0001	2	RNA synthesis	AT2G15430.1	DNA-directed RNA polymerase family protein
D3W	7492	Pavir.Ga00735.1	30302898	Pavir.Ga00735.1.p|PACid:30302898	-1.1545	0.449221847894992	<.0001	3	RNA synthesis	AT1G80480.1	plastid transcriptionally active 17
D3W	5754	Pavir.Gb00413.1	30223284	Pavir.Gb00413.1.p|PACid:30223284	0.98018	1.97271152193038	<.0001	6	Secondary metabolism	AT1G61720.1	NAD(P)-binding Rossmann-fold superfamily protein
D3W	6820	Pavir.Ib01731.1	30241164	Pavir.Ib01731.1.p|PACid:30241164	1.0205	2.02862190453872	0.001	2	Secondary metabolism	AT5G23960.2	terpene synthase 21
D3W	5006	Pavir.J37198.1	30267363	Pavir.J37198.1.p|PACid:30267363	1.0679	2.09637963603427	<.0001	4	Secondary metabolism	AT1G61720.1	NAD(P)-binding Rossmann-fold superfamily protein
D3W	8191	Pavir.Fa02186.1	30187239	Pavir.Fa02186.1.p|PACid:30187239	1.5231	2.87407956219851	<.0001	2	Secondary metabolism	AT5G67150.1	HXXXD-type acyl-transferase family protein
D3W	3109	Pavir.J01629.1	30219376	Pavir.J01629.1.p|PACid:30219376	-2.1698	0.222241477366898	0.0004	2	Signaling regulation	AT5G44460.1	calmodulin like 43
D3W	4715	Pavir.Ba00296.1	30293679	Pavir.Ba00296.1.p|PACid:30293679	-2.025	0.245705149636313	<.0001	12	Signaling regulation	AT2G27030.3	calmodulin 5
D3W	1602	Pavir.Hb00704.1	30266743	Pavir.Hb00704.1.p|PACid:30266743	-1.619	0.325561047392257	<.0001	3	Signaling regulation	AT3G02520.1	general regulatory factor 7
D3W	3687	Pavir.Gb00126.1	30223660	Pavir.Gb00126.1.p|PACid:30223660	-1.4606	0.363341988218518	<.0001	3	Signaling regulation	AT1G19870.1	IQ-domain 32
D3W	1774	Pavir.Fa00854.1	30186975	Pavir.Fa00854.1.p|PACid:30186975	-1.45709	0.364227056099631	<.0001	10	Signaling regulation	AT3G02520.1	general regulatory factor 7
D3W	5723	Pavir.Ib01232.1	30240992	Pavir.Ib01232.1.p|PACid:30240992	-1.4376	0.369180945924805	<.0001	4	Signaling regulation	AT5G49480.1	Ca2+-binding protein 1
D3W	3100	Pavir.Ca01449.1	30206389	Pavir.Ca01449.1.p|PACid:30206389	-1.3011	0.405816660446336	<.0001	6	Signaling regulation	AT1G07140.1	Pleckstrin homology (PH) domain superfamily protein
D3W	2498	Pavir.J16866.1	30294626	Pavir.J16866.1.p|PACid:30294626	-1.1711	0.444082615393094	<.0001	2	Signaling regulation	AT3G02520.1	general regulatory factor 7
D3W	7897	Pavir.Ab00804.1	30234181	Pavir.Ab00804.1.p|PACid:30234181	-1.1192	0.46034902625287	<.0001	2	Signaling regulation	AT5G08580.1	Calcium-binding EF hand family protein
D3W	2722	Pavir.J04268.1	30208451	Pavir.J04268.1.p|PACid:30208451	-1.02817	0.490331720341577	<.0001	10	Signaling regulation	AT3G55020.1	Ypt/Rab-GAP domain of gyp1p superfamily protein
D3W	3460	Pavir.Gb01520.1	30221920	Pavir.Gb01520.1.p|PACid:30221920	-1.0112	0.496133403881297	<.0001	3	Signaling regulation	AT3G02520.1	general regulatory factor 7
D3W	1546	Pavir.Ha01480.1	30316513	Pavir.Ha01480.1.p|PACid:30316513	-0.9764	0.508246401285059	0.0046	3	Signaling regulation	AT3G02520.1	general regulatory factor 7
D3W	7555	Pavir.J13770.1	30219886	Pavir.J13770.1.p|PACid:30219886	1.0754	2.10730626027738	<.0001	2	Signaling regulation	AT3G24550.1	proline extensin-like receptor kinase 1
D3W	4491	Pavir.Eb00944.1	30309163	Pavir.Eb00944.1.p|PACid:30309163	1.2287	2.34355718765977	<.0001	8	Signaling regulation	AT4G15800.1	ralf-like 33
D3W	2002	Pavir.Eb00019.1	30314169	Pavir.Eb00019.1.p|PACid:30314169	1.568	2.96493401960567	<.0001	4	Signaling regulation	AT4G20260.5	plasma-membrane associated cation-binding protein 1
D3W	7209	Pavir.Cb00876.1	30269914	Pavir.Cb00876.1.p|PACid:30269914	1.60923	3.05088965232294	<.0001	7	Signaling regulation	AT3G05490.1	ralf-like 22
D3W	7584	Pavir.Fb01354.1	30279620	Pavir.Fb01354.1.p|PACid:30279620	1.7069	3.26458589291029	<.0001	2	Signaling regulation	AT2G33380.1	Caleosin-related family protein
D3W	5446	Pavir.Ea01561.1	30227923	Pavir.Ea01561.1.p|PACid:30227923	1.9878	3.96631703654461	<.0001	6	Signaling regulation	AT4G23180.1	cysteine-rich RLK (RECEPTOR-like protein kinase) 10
D3W	3732	Pavir.Ea02983.1	30228167	Pavir.Ea02983.1.p|PACid:30228167	1.1143	2.16489942042755	0.003	3	TCA cycle	AT1G79750.1	NADP-malic enzyme 4
D3W	3690	Pavir.Db01776.1	30261030	Pavir.Db01776.1.p|PACid:30261030	1.653	3.14486916856133	<.0001	9	TCA cycle	AT1G24180.1	Thiamin diphosphate-binding fold (THDP-binding) superfamily protein
D3W	5355	Pavir.J16984.1	30307708	Pavir.J16984.1.p|PACid:30307708	-1.49086	0.355800390718712	<.0001	7	Transport	AT5G54750.1	Transport protein particle (TRAPP) component
D3W	6947	Pavir.Fa00172.1	30188767	Pavir.Fa00172.1.p|PACid:30188767	1.0452	2.06365242174543	<.0001	6	Transport	AT5G04750.1	F1F0-ATPase inhibitor protein, putative
D3W	867	Pavir.Ga00718.1	30305025	Pavir.Ga00718.1.p|PACid:30305025	1.0899	2.12859281698219	0.0041	2	Transport	AT3G01390.1	vacuolar membrane ATPase 10
D3W	6731	Pavir.Aa01363.1	30251544	Pavir.Aa01363.1.p|PACid:30251544	1.9225	3.79079384379353	<.0001	2	Transport	AT5G58070.1	temperature-induced lipocalin
D3W	8758	Pavir.Ab01809.1	30232311	Pavir.Ab01809.1.p|PACid:30232311	2.4375	5.41702218774757	<.0001	3	Transport	AT5G04750.1	F1F0-ATPase inhibitor protein, putative
D3W	6501	Pavir.J08753.1	30217806	Pavir.J08753.1.p|PACid:30217806	-1.3162	0.401591322140887	<.0001	4	Unclassified	AT1G15230.1	N
D3W	7867	Pavir.J20535.1	30301723	Pavir.J20535.1.p|PACid:30301723	-1.1313	0.456504187758318	<.0001	4	Unclassified	AT1G15230.1	N
D3W	6914	Pavir.Ba00387.1	30293285	Pavir.Ba00387.1.p|PACid:30293285	-1.1182	0.460668226496085	0.014	2	Unclassified	AT1G22270.1	Trm112p-like protein
D3W	3808	Pavir.Ca01039.1	30205787	Pavir.Ca01039.1.p|PACid:30205787	-1.2277	0.426997639627413	<.0001	10	Unclassified	AT1G71730.1	N
D3W	3171	Pavir.Fa01323.1	30187368	Pavir.Fa01323.1.p|PACid:30187368	-1.1944	0.436968140114496	<.0001	5	Unclassified	AT2G18990.1	thioredoxin domain-containing protein 9 homolog
D3W	2958	Pavir.J01484.1	30198494	Pavir.J01484.1.p|PACid:30198494	-1.5268	0.34704628725037	<.0001	3	Unclassified	AT2G26590.1	regulatory particle non-ATPase 13
D3W	2665	Pavir.J00527.1	30273515	Pavir.J00527.1.p|PACid:30273515	-1.3089	0.403628513679407	<.0001	4	Unclassified	AT2G26590.1	regulatory particle non-ATPase 13
D3W	2204	Pavir.Ia03652.1	30210763	Pavir.Ia03652.1.p|PACid:30210763	-1.0511	0.482600059989426	<.0001	5	Unclassified	AT3G53630.1	N
D3W	2763	Pavir.Ib01296.1	30236907	Pavir.Ib01296.1.p|PACid:30236907	-1.0317	0.489133438588312	0.0004	2	Unclassified	AT3G53630.1	N
D3W	1985	Pavir.J07986.1	30306280	Pavir.J07986.1.p|PACid:30306280	-1.6032	0.329146098013914	0.0001	2	Unclassified	AT4G02450.1	HSP20-like chaperones superfamily protein
D3W	1683	Pavir.Fb01457.1	30279046	Pavir.Fb01457.1.p|PACid:30279046	-1.54001	0.343883070910864	<.0001	13	Unclassified	AT4G02450.1	HSP20-like chaperones superfamily protein
D3W	3255	Pavir.Cb00879.1	30269771	Pavir.Cb00879.1.p|PACid:30269771	-1.39142	0.38118942460177	<.0001	19	Unclassified	AT4G15790.1	N
D3W	7475	Pavir.Gb00190.1	30223152	Pavir.Gb00190.1.p|PACid:30223152	-0.9454	0.519285555160217	0.0001	2	Unclassified	AT4G31430.2	N
D3W	2443	Pavir.J21702.1	30200504	Pavir.J21702.1.p|PACid:30200504	-1.1059	0.46461254049661	0.005	2	Unclassified	AT4G37210.1	Tetratricopeptide repeat (TPR)-like superfamily protein
D3W	8143	Pavir.Eb00723.1	30311233	Pavir.Eb00723.1.p|PACid:30311233	-1.6095	0.327711907577979	<.0001	3	Unclassified	AT5G05990.1	Mitochondrial glycoprotein family protein
D3W	4555	Pavir.Hb00623.1	30266504	Pavir.Hb00623.1.p|PACid:30266504	-0.9767	0.508140725404757	<.0001	11	Unclassified	AT5G12410.1	THUMP domain-containing protein
D3W	1284	Pavir.J29111.1	30244668	Pavir.J29111.1.p|PACid:30244668	-0.97451	0.508912664877023	<.0001	21	Unclassified	AT5G16730.1	Plant protein of unknown function (DUF827)
D3W	6444	Pavir.Ib03761.1	30237374	Pavir.Ib03761.1.p|PACid:30237374	-0.9977	0.500797754994549	0.0003	2	Unclassified	AT5G41950.1	Tetratricopeptide repeat (TPR)-like superfamily protein
D3W	7582	Pavir.Ab03028.1	30235796	Pavir.Ab03028.1.p|PACid:30235796	-1.6092	0.32778006043916	0.0012	2	Unclassified	AT5G47680.1	N
D3W	7403	Pavir.Fb00766.1	30279614	Pavir.Fb00766.1.p|PACid:30279614	-1.17617	0.442524734306178	<.0001	7	Unclassified	AT5G52200.1	phosphoprotein phosphatase inhibitors
D3W	6489	Pavir.J21027.1	30247869	Pavir.J21027.1.p|PACid:30247869	1.7563	3.37830597563854	<.0001	4	Unclassified	AT1G02700.1	N
D3W	4734	Pavir.J16010.1	30195800	Pavir.J16010.1.p|PACid:30195800	1.13	2.18858740252148	<.0001	4	Unclassified	AT1G07090.1	Protein of unknown function (DUF640)
D3W	4551	Pavir.Ga02727.1	30302629	Pavir.Ga02727.1.p|PACid:30302629	1.1459	2.2128413183965	<.0001	9	Unclassified	AT1G20225.1	Thioredoxin superfamily protein
D3W	7035	Pavir.Fa01556.1	30187567	Pavir.Fa01556.1.p|PACid:30187567	1.8389	3.57737163403023	<.0001	5	Unclassified	AT1G32300.1	D-arabinono-1,4-lactone oxidase family protein
D3W	6649	Pavir.Ab00009.1	30236274	Pavir.Ab00009.1.p|PACid:30236274	1.0313	2.04386513104842	0.0037	2	Unclassified	AT1G33230.1	TMPIT-like protein
D3W	6184	Pavir.Ib01269.1	30240572	Pavir.Ib01269.1.p|PACid:30240572	1.0276	2.03863005936072	<.0001	5	Unclassified	AT1G47278.2	N
D3W	9364	Pavir.J38252.1	30191144	Pavir.J38252.1.p|PACid:30191144	1.0523	2.07383339873746	<.0001	2	Unclassified	AT1G60420.1	DC1 domain-containing protein
D3W	3032	Pavir.J01632.1	30273203	Pavir.J01632.1.p|PACid:30273203	1.0853	2.121816656235	<.0001	16	Unclassified	AT1G71950.1	Proteinase inhibitor, propeptide
D3W	7287	Pavir.J20958.1	30247691	Pavir.J20958.1.p|PACid:30247691	1.0037	2.00513587216441	<.0001	3	Unclassified	AT2G17120.1	lysm domain GPI-anchored protein 2 precursor
D3W	8687	Pavir.Ba03988.1	30292248	Pavir.Ba03988.1.p|PACid:30292248	0.9759	1.96686781043972	0.0036	2	Unclassified	AT2G23090.1	Uncharacterised protein family SERF
D3W	6701	Pavir.Hb01608.1	30265005	Pavir.Hb01608.1.p|PACid:30265005	1.1235	2.17874899670112	<.0001	7	Unclassified	AT2G31725.1	Eukaryotic protein of unknown function (DUF842)
D3W	2903	Pavir.J13410.1	30208196	Pavir.J13410.1.p|PACid:30208196	1.0005	2.00069326730769	<.0001	7	Unclassified	AT2G39050.1	hydroxyproline-rich glycoprotein family protein
D3W	71	Pavir.Ia03444.1	30214087	Pavir.Ia03444.1.p|PACid:30214087	1.1547	2.22638022556598	<.0001	29	Unclassified	AT2G39050.1	hydroxyproline-rich glycoprotein family protein
D3W	89	Pavir.Ia03444.2	30214088	Pavir.Ia03444.2.p|PACid:30214088	1.2389	2.36018508543872	<.0001	11	Unclassified	AT2G39050.1	hydroxyproline-rich glycoprotein family protein
D3W	3704	Pavir.Fa01008.1	30186143	Pavir.Fa01008.1.p|PACid:30186143	1.00706	2.00981122480852	<.0001	13	Unclassified	AT2G46750.1	D-arabinono-1,4-lactone oxidase family protein
D3W	4040	Pavir.Fa01601.1	30186390	Pavir.Fa01601.1.p|PACid:30186390	1.6601	3.16038430100838	<.0001	10	Unclassified	AT2G46760.1	D-arabinono-1,4-lactone oxidase family protein
D3W	7779	Pavir.Db02130.1	30260942	Pavir.Db02130.1.p|PACid:30260942	1.51205	2.85215028101169	<.0001	4	Unclassified	AT3G02645.1	Plant protein of unknown function (DUF247)
D3W	5643	Pavir.Bb00247.1	30298381	Pavir.Bb00247.1.p|PACid:30298381	1.4455	2.72357198757141	<.0001	4	Unclassified	AT3G10260.3	Reticulon family protein
D3W	5709	Pavir.J35054.1	30225162	Pavir.J35054.1.p|PACid:30225162	1.04681	2.06595667516267	<.0001	8	Unclassified	AT3G11780.1	MD-2-related lipid recognition domain-containing protein / ML domain-containing protein
D3W	7728	Pavir.Ca02217.1	30206046	Pavir.Ca02217.1.p|PACid:30206046	0.9818	1.97492792076865	0.0003	2	Unclassified	AT3G19340.1	Protein of unknown function (DUF3754)
D3W	7139	Pavir.J00857.1	30287452	Pavir.J00857.1.p|PACid:30287452	1.3118	2.48251081012278	0.0002	3	Unclassified	AT3G24100.1	Uncharacterised protein family SERF
D3W	858	Pavir.Ib03633.1	30239106	Pavir.Ib03633.1.p|PACid:30239106	1.5199	2.86771171451353	<.0001	16	Unclassified	AT3G46750.1	N
D3W	3970	Pavir.Ia01772.1	30210495	Pavir.Ia01772.1.p|PACid:30210495	0.9608	1.94638890281659	0.0004	2	Unclassified	AT4G05400.1	copper ion binding
D3W	3759	Pavir.J26523.1	30287619	Pavir.J26523.1.p|PACid:30287619	1.0569	2.08045632180268	<.0001	4	Unclassified	AT4G05400.1	copper ion binding
D3W	4600	Pavir.Da02334.1	30193518	Pavir.Da02334.1.p|PACid:30193518	1.0527	2.0744084671645	<.0001	3	Unclassified	AT4G12130.1	Glycine cleavage T-protein family
D3W	6059	Pavir.Gb00667.1	30221854	Pavir.Gb00667.1.p|PACid:30221854	1.2565	2.38915424844682	<.0001	5	Unclassified	AT4G13200.1	N
D3W	7879	Pavir.Ba01924.1	30292089	Pavir.Ba01924.1.p|PACid:30292089	1.0048	2.00666529485766	0.0079	2	Unclassified	AT4G25315.2	Expressed protein
D3W	7965	Pavir.Ib03696.1	30241723	Pavir.Ib03696.1.p|PACid:30241723	1.2453	2.37067845935877	0.0002	2	Unclassified	AT4G31830.1	N
D3W	465	Pavir.Ib00428.1	30242435	Pavir.Ib00428.1.p|PACid:30242435	2.71227	6.55351995766516	<.0001	57	Unclassified	AT4G36600.1	Late embryogenesis abundant (LEA) protein
D3W	1984	Pavir.J28600.1	30202435	Pavir.J28600.1.p|PACid:30202435	2.7562	6.75614363485546	<.0001	6	Unclassified	AT4G36600.1	Late embryogenesis abundant (LEA) protein
D3W	3893	Pavir.Ga01474.1	30304748	Pavir.Ga01474.1.p|PACid:30304748	1.4102	2.6577400436594	<.0001	3	Unclassified	AT4G39730.1	Lipase/lipooxygenase, PLAT/LH2 family protein
D3W	6308	Pavir.J01936.1	30195714	Pavir.J01936.1.p|PACid:30195714	1.736	3.3311030835222	<.0001	3	Unclassified	AT4G39730.1	Lipase/lipooxygenase, PLAT/LH2 family protein
D3W	2034	Pavir.J02312.1	30294775	Pavir.J02312.1.p|PACid:30294775	1.76534	3.39954107214131	<.0001	34	Unclassified	AT5G01300.1	PEBP (phosphatidylethanolamine-binding protein) family protein
D3W	7898	Pavir.Ea00473.1	30231117	Pavir.Ea00473.1.p|PACid:30231117	1.197	2.29262437145676	<.0001	3	Unclassified	AT5G06570.1	alpha/beta-Hydrolases superfamily protein
D3W	3643	Pavir.J02339.1	30244319	Pavir.J02339.1.p|PACid:30244319	1.26436	2.40220620987404	<.0001	11	Unclassified	AT5G06570.1	alpha/beta-Hydrolases superfamily protein
D3W	5166	Pavir.Hb00971.1	30264344	Pavir.Hb00971.1.p|PACid:30264344	2.1585	4.464504300492	<.0001	5	Unclassified	AT5G07330.1	N
D3W	8087	Pavir.Bb01883.1	30296571	Pavir.Bb01883.1.p|PACid:30296571	1.0418	2.05879473753046	<.0001	3	Unclassified	AT5G16940.1	carbon-sulfur lyases
D3W	3950	Pavir.Ia01546.1	30211162	Pavir.Ia01546.1.p|PACid:30211162	1.022	2.03073220173886	<.0001	16	Unclassified	AT5G23760.1	Copper transport protein family
D3W	7015	Pavir.Ib00111.1	30241389	Pavir.Ib00111.1.p|PACid:30241389	1.6958	3.23956476436104	<.0001	3	Unclassified	AT5G23760.1	Copper transport protein family
D3W	7708	Pavir.J39373.1	30219689	Pavir.J39373.1.p|PACid:30219689	1.1403	2.20426854885834	0.0036	2	Unclassified	AT5G30495.1	Fcf2 pre-rRNA processing protein
D3W	8259	Pavir.Da01043.1	30194438	Pavir.Da01043.1.p|PACid:30194438	1.1031	2.14815783703474	<.0001	2	Unclassified	AT5G41761.1	N
D3W	7843	Pavir.Da00216.1	30192569	Pavir.Da00216.1.p|PACid:30192569	1.1455	2.2122278735536	<.0001	2	Unclassified	AT5G43400.1	Uncharacterised conserved protein UCP015417, vWA
D3W	4743	Pavir.Aa02737.1	30249647	Pavir.Aa02737.1.p|PACid:30249647	1.7364	3.33202678945331	<.0001	6	Unclassified	AT5G44310.2	Late embryogenesis abundant protein (LEA) family protein
D3W	6279	Pavir.Gb00543.1	30223554	Pavir.Gb00543.1.p|PACid:30223554	2.6046	6.08222842737005	<.0001	4	Unclassified	AT5G44310.2	Late embryogenesis abundant protein (LEA) family protein
D3W	4295	Pavir.Ga00596.1	30302580	Pavir.Ga00596.1.p|PACid:30302580	2.6851	6.43125369103233	<.0001	9	Unclassified	AT5G44310.2	Late embryogenesis abundant protein (LEA) family protein
D3W	5707	Pavir.Ha01784.1	30318216	Pavir.Ha01784.1.p|PACid:30318216	1.0794	2.11315706103298	0.0059	2	Unclassified	AT5G49210.1	N
D3W	8149	Pavir.Fa00936.1	30187051	Pavir.Fa00936.1.p|PACid:30187051	0.9825	1.97588639428103	0.0004	3	Unclassified	AT5G58005.1	Cytochrome c oxidase, subunit Vib family protein
D3W	9030	Pavir.J31426.1	30202559	Pavir.J31426.1.p|PACid:30202559	1.8162	3.52152420733075	<.0001	2	Unclassified	AT5G61412.1	N
D3W	3838	Pavir.Fa00273.1	30187612	Pavir.Fa00273.1.p|PACid:30187612	1.17267	2.25428512335819	<.0001	12	Unclassified	AT5G61820.1	N
D3W	3414	Pavir.J05274.1	30201830	Pavir.J05274.1.p|PACid:30201830	1.3996	2.6382842324198	<.0001	15	Unclassified	AT5G66780.1	N
D3W	5217	Pavir.Ia00911.1	30215736	Pavir.Ia00911.1.p|PACid:30215736	1.4986	2.82568373326161	<.0001	9	Unclassified	AT5G66780.1	N
