# Supplementary material for: Comparative Proteomics of Root Apex and Root Elongation Zones Provides Insights into Molecular Mechanisms for Drought Stress and Recovery Adjustment in Switchgrass
Source: Proteomes. 2020 Feb 19;8(1):3. doi: 10.3390/proteomes8010003 (PMC7151713; doi:10.3390/proteomes8010003)
Supplement: Supplementary file 1 [file proteomes-08-00003-s001.zip › Final_Revised_Supplemental Data/TableS2 List of drought-induced differentially expressed proteins from RT1 and RT2.xlsx]

## Sheet: total sig_pro in each group
Tissue	prot_acc&ID	prot_acc	tave/Cave	log2(Tave/Cave)	p	pro_ID	protein_acc	os_annotation_number	os_annotation	arabidopsis_annotation_number	arabidopsis_annotation
A.E	Pavir.Aa00129.1.p|PACid:30252579	Pavir.Aa00129.1	0.37434374	-1.417564468	0.032144	30252579	Pavir.Aa00129.1	LOC_Os02g56900.1	thioredoxin family protein, putative, expressed	AT3G07090.1	PPPDE putative thiol peptidase family protein
A.E	Pavir.Aa00238.1.p|PACid:30253808	Pavir.Aa00238.1	0.35957425	-1.475638389	0.000613	30253808	Pavir.Aa00238.1	LOC_Os02g54780.1	CYPRO4, putative, expressed	h	Vacuolar import/degradation, Vid27-related protein
A.E	Pavir.Aa00702.1.p|PACid:30253005	Pavir.Aa00702.1	2.61823995	1.388597321	0.004417	30253005	Pavir.Aa00702.1	LOC_Os02g51180.1	cullin, putative, expressed	AT1G26830.1	cullin 3
A.E	Pavir.Aa00714.2.p|PACid:30253441	Pavir.Aa00714.2	3.9998073	1.999930495	0.006941	30253441	Pavir.Aa00714.2	LOC_Os02g50970.1	protein kinase domain containing protein, expressed	AT1G18160.1	Protein kinase superfamily protein
A.E	Pavir.Aa00922.1.p|PACid:30249394	Pavir.Aa00922.1	0.20585165	-2.280323107	0.001667
A.E	Pavir.Aa01224.1.p|PACid:30249170	Pavir.Aa01224.1	0.24174171	-2.048461693	0.000158	30249170	Pavir.Aa01224.1	LOC_Os02g42940.1	MSP domain containing protein, expressed	AT2G45140.1	plant VAP homolog 12
A.E	Pavir.Aa01269.1.p|PACid:30251412	Pavir.Aa01269.1	0.374283	-1.417798576	1.62e-05	30251412	Pavir.Aa01269.1	LOC_Os02g41990.1	expressed protein	AT4G31080.1	Protein of unknown function (DUF2296)
A.E	Pavir.Aa02049.1.p|PACid:30249853	Pavir.Aa02049.1	3.35911071	1.748079344	0.000997	30249853	Pavir.Aa02049.1	LOC_Os02g58590.1	N-acetylglucosaminyltransferase I, putative, expressed	AT4G38240.1	alpha-1,3-mannosyl-glycoprotein beta-1,2-N-acetylglucosaminyltransferase, putative
A.E	Pavir.Aa02614.1.p|PACid:30253703	Pavir.Aa02614.1	2.78029582	1.475238394	0.000312	30253703	Pavir.Aa02614.1	LOC_Os02g26440.1	prefoldin subunit, putative, expressed	AT2G07340.1	PREFOLDIN 1
A.E	Pavir.Aa03126.1.p|PACid:30251060	Pavir.Aa03126.1	2.5259216	1.336809861	0.001983	30251060	Pavir.Aa03126.1	LOC_Os02g09150.2	inorganic H+ pyrophosphatase, putative, expressed	AT1G15690.2	Inorganic H pyrophosphatase family protein
A.E	Pavir.Aa03288.1.p|PACid:30249474	Pavir.Aa03288.1	0.3680941	-1.441853458	0.000551	30249474	Pavir.Aa03288.1	LOC_Os02g06690.1	plastocyanin-like domain containing protein, putative, expressed	AT3G20570.1	early nodulin-like protein 9
A.E	Pavir.Aa03473.1.p|PACid:30252074	Pavir.Aa03473.1	3.46799509	1.794101855	0.022108	30252074	Pavir.Aa03473.1	LOC_Os02g03000.2	division protein, putative, expressed	AT5G42480.1	Chaperone DnaJ-domain superfamily protein
A.E	Pavir.Aa03591.1.p|PACid:30249284	Pavir.Aa03591.1	3.16597492	1.662649828	0.000166	30249284	Pavir.Aa03591.1	ChrUn.fgenesh.mRNA.85	expressed protein	AT2G46020.2	transcription regulatory protein SNF2, putative
A.E	Pavir.Ab00145.1.p|PACid:30235090	Pavir.Ab00145.1	0.37353502	-1.420684588	0.010691	30235090	Pavir.Ab00145.1	LOC_Os02g03740.1	pyridoxal biosynthesis protein PDX2, putative, expressed	AT5G60540.1	pyridoxine biosynthesis 2
A.E	Pavir.Ab00822.1.p|PACid:30234325	Pavir.Ab00822.1	0.27320016	-1.871969747	0.013972	30234325	Pavir.Ab00822.1	LOC_Os02g13330.1	bet v I allergen family protein, putative, expressed	AT2G26040.1	PYR1-like 2
A.E	Pavir.Ab01424.1.p|PACid:30234285	Pavir.Ab01424.1	2.81606313	1.493679675	0.00017	30234285	Pavir.Ab01424.1	LOC_Os05g33380.1	fructose-bisphospate aldolase isozyme, putative, expressed	AT2G36460.1	Aldolase superfamily protein
A.E	Pavir.Ab01425.1.p|PACid:30233317	Pavir.Ab01425.1	0.33345012	-1.584457127	0.015524	30233317	Pavir.Ab01425.1	LOC_Os05g25450.1	TKL_IRAK_CrRLK1L-1.3 - The CrRLK1L-1 subfamily has homology to the CrRLK1L homolog, expressed	AT3G51550.1	Malectin/receptor-like protein kinase family protein
A.E	Pavir.Ab02367.1.p|PACid:30234844	Pavir.Ab02367.1	2.97338832	1.572107889	0.003412	30234844	Pavir.Ab02367.1	LOC_Os08g42530.1	SFC, putative, expressed	AT5G61980.1	ARF-GAP domain 1
A.E	Pavir.Ab02811.1.p|PACid:30233444	Pavir.Ab02811.1	0.36157222	-1.467644269	0.00037	30233444	Pavir.Ab02811.1	LOC_Os04g57320.1	immutans protein, putative, expressed	AT3G22370.1	alternative oxidase 1A
A.E	Pavir.Ab02874.1.p|PACid:30232867	Pavir.Ab02874.1	6.37408774	2.672218879	0.0083	30232867	Pavir.Ab02874.1	LOC_Os02g48810.1	PHD-finger family protein, expressed	AT3G20280.1	RING/FYVE/PHD zinc finger superfamily protein
A.E	Pavir.Ab03022.1.p|PACid:30234681	Pavir.Ab03022.1	0.34023881	-1.555380377	0.005998	30234681	Pavir.Ab03022.1	LOC_Os02g49450.1	BSD domain-containing protein, putative, expressed	AT1G26300.1	BSD domain-containing protein
A.E	Pavir.Ab03037.1.p|PACid:30234572	Pavir.Ab03037.1	8.66552175	3.115286617	0.000103	30234572	Pavir.Ab03037.1	LOC_Os02g49090.1	WD domain, G-beta repeat domain containing protein, expressed	AT3G13290.1	varicose-related
A.E	Pavir.Ab03185.1.p|PACid:30236621	Pavir.Ab03185.1	0.28514807	-1.810216814	0.005991	30236621	Pavir.Ab03185.1	LOC_Os02g55940.1	ribosomal protein S15 containing protein, expressed	AT1G15810.1	S15/NS1, RNA-binding protein
A.E	Pavir.Ba00100.1.p|PACid:30289773	Pavir.Ba00100.1	2.98017679	1.575397916	0.00012	30289773	Pavir.Ba00100.1	LOC_Os07g46370.1	WD domain, G-beta repeat domain containing protein, expressed	AT3G63460.1	transducin family protein / WD-40 repeat family protein
A.E	Pavir.Ba00102.1.p|PACid:30289865	Pavir.Ba00102.1	3.03284619	1.600672332	0.000205	30289865	Pavir.Ba00102.1	LOC_Os08g03640.1	60S acidic ribosomal protein P0, putative, expressed	AT2G40010.1	Ribosomal protein L10 family protein
A.E	Pavir.Ba00117.1.p|PACid:30290579	Pavir.Ba00117.1	2.90541727	1.538745374	0.001494	30290579	Pavir.Ba00117.1	LOC_Os07g46630.1	AMP deaminase, putative, expressed	AT4G04880.1	adenosine/AMP deaminase family protein
A.E	Pavir.Ba00757.1.p|PACid:30293217	Pavir.Ba00757.1	2.86113012	1.516585111	0.009371	30293217	Pavir.Ba00757.1	LOC_Os07g34580.1	glycosyl hydrolases family 16, putative, expressed	AT1G11545.1	xyloglucan endotransglucosylase/hydrolase 8
A.E	Pavir.Ba01192.1.p|PACid:30291978	Pavir.Ba01192.1	0.22019542	-2.183143662	0.010749	30291978	Pavir.Ba01192.1	LOC_Os09g37000.1	26S proteasome non-ATPase regulatory subunit 3, putative, expressed	AT1G20200.1	PAM domain (PCI/PINT associated module) protein
A.E	Pavir.Ba01270.1.p|PACid:30291875	Pavir.Ba01270.1	0.31607166	-1.661676388	0.009302	30291875	Pavir.Ba01270.1	LOC_Os09g35710.1	UBX domain-containing protein, putative, expressed	AT4G11740.1	Ubiquitin-like superfamily protein
A.E	Pavir.Ba01275.1.p|PACid:30293657	Pavir.Ba01275.1	3.01833336	1.593752155	0.002179	30293657	Pavir.Ba01275.1	LOC_Os09g35630.1	BAG domain-containing protein, putative, expressed	AT5G52060.1	BCL-2-associated athanogene 1
A.E	Pavir.Ba01308.1.p|PACid:30292858	Pavir.Ba01308.1	3.76651234	1.913229256	0.01526	30292858	Pavir.Ba01308.1	LOC_Os09g34320.1	expressed protein	AT1G01180.1	S-adenosyl-L-methionine-dependent methyltransferases superfamily protein
A.E	Pavir.Ba01419.1.p|PACid:30292014	Pavir.Ba01419.1	2.56962897	1.361560064	0.00696	30292014	Pavir.Ba01419.1	LOC_Os09g38550.1	protein phosphatase 2C, putative, expressed	AT4G31860.1	Protein phosphatase 2C family protein
A.E	Pavir.Ba01624.1.p|PACid:30293695	Pavir.Ba01624.1	2.62443685	1.392007884	0.036493	30293695	Pavir.Ba01624.1	LOC_Os09g32526.1	peptidyl-prolyl cis-trans isomerase, FKBP-type, putative, expressed	AT3G25220.1	FK506-binding protein 15 kD-1
A.E	Pavir.Ba01636.1.p|PACid:30292448	Pavir.Ba01636.1	4.07615204	2.027207866	0.002693	30292448	Pavir.Ba01636.1	LOC_Os09g28280.1	gibberellin receptor GID1L2, putative, expressed	AT1G47480.1	alpha/beta-Hydrolases superfamily protein
A.E	Pavir.Ba01978.1.p|PACid:30293088	Pavir.Ba01978.1	3.88396475	1.957530106	0.000346	30293088	Pavir.Ba01978.1	LOC_Os09g29070.1	glucose-6-phosphate isomerase, putative, expressed	AT4G24620.1	phosphoglucose isomerase 1
A.E	Pavir.Ba02960.1.p|PACid:30292908	Pavir.Ba02960.1	0.39405562	-1.343528808	0.00011	30292908	Pavir.Ba02960.1	LOC_Os09g19734.3	isochorismate synthase 1, chloroplast precursor, putative, expressed	AT3G01280.1	voltage dependent anion channel 1
A.E	Pavir.Ba03030.1.p|PACid:30293582	Pavir.Ba03030.1	2.68841336	1.426754979	0.002295	30293582	Pavir.Ba03030.1	LOC_Os09g03610.1	flowering time control protein FCA, putative, expressed	AT4G16280.3	RNA binding;abscisic acid binding
A.E	Pavir.Ba03040.1.p|PACid:30290381	Pavir.Ba03040.1	0.39386095	-1.34424171	0.000766	30290381	Pavir.Ba03040.1	LOC_Os09g17600.1	membrane protein, putative, expressed	AT2G25737.1	Sulfite exporter TauE/SafE family protein
A.E	Pavir.Ba03493.1.p|PACid:30291790	Pavir.Ba03493.1	2.52716259	1.337518486	0.004491	30291790	Pavir.Ba03493.1	LOC_Os07g09520.1	expressed protein	AT1G74790.1	catalytics
A.E	Pavir.Bb00094.1.p|PACid:30296579	Pavir.Bb00094.1	9.72121451	3.281136567	0.005099	30296579	Pavir.Bb00094.1	LOC_Os07g01560.1	transporter family protein, putative, expressed	AT1G11260.1	sugar transporter 1
A.E	Pavir.Bb00286.1.p|PACid:30297760	Pavir.Bb00286.1	0.27933259	-1.839944201	0.000589	30297760	Pavir.Bb00286.1	LOC_Os07g05640.1	transporter family protein, putative, expressed	AT1G30220.1	inositol transporter 2
A.E	Pavir.Bb00308.1.p|PACid:30299925	Pavir.Bb00308.1	3.57254951	1.836954004	0.002207	30299925	Pavir.Bb00308.1	LOC_Os07g32020.1	UDP-glucoronosyl and UDP-glucosyl transferase domain containing protein, expressed	AT1G07250.1	UDP-glucosyl transferase 71C4
A.E	Pavir.Bb00384.1.p|PACid:30296705	Pavir.Bb00384.1	0.36680784	-1.446903612	0.005346	30296705	Pavir.Bb00384.1	LOC_Os07g07550.1	galactose-1-phosphate uridyl transferase, putative, expressed	AT5G18200.1	UTP:galactose-1-phosphate uridylyltransferases;ribose-5-phosphate adenylyltransferases
A.E	Pavir.Bb00430.1.p|PACid:30298873	Pavir.Bb00430.1	2.61064265	1.38440499	0.014395	30298873	Pavir.Bb00430.1	LOC_Os07g08840.1	thioredoxin, putative, expressed	AT3G51030.1	thioredoxin H-type 1
A.E	Pavir.Bb00477.1.p|PACid:30301118	Pavir.Bb00477.1	0.31868468	-1.649798441	0.049669	30301118	Pavir.Bb00477.1	LOC_Os07g08430.1	indole-3-glycerol phosphate lyase, chloroplast precursor, putative, expressed	AT4G02610.1	Aldolase-type TIM barrel family protein
A.E	Pavir.Bb00969.1.p|PACid:30297890	Pavir.Bb00969.1	3.93419145	1.976067164	0.009555	30297890	Pavir.Bb00969.1	LOC_Os07g27450.1	expressed protein	AT1G05210.1	Transmembrane protein 97, predicted
A.E	Pavir.Bb00986.1.p|PACid:30299292	Pavir.Bb00986.1	2.67563446	1.41988103	0.000811	30299292	Pavir.Bb00986.1	LOC_Os07g19530.1	peptidase, putative, expressed	AT1G67420.2	Zn-dependent exopeptidases superfamily protein
A.E	Pavir.Bb01179.1.p|PACid:30299275	Pavir.Bb01179.1	28.5067554	4.833231936	0.000282
A.E	Pavir.Bb01199.1.p|PACid:30301130	Pavir.Bb01199.1	3.21854527	1.686408763	0.008293	30301130	Pavir.Bb01199.1	LOC_Os03g62700.1	protein kinase, putative, expressed	AT3G59350.1	Protein kinase superfamily protein
A.E	Pavir.Bb01320.2.p|PACid:30298173	Pavir.Bb01320.2	0.38870137	-1.363265907	0.000933	30298173	Pavir.Bb01320.2	LOC_Os07g26690.1	aquaporin protein, putative, expressed	AT3G53420.1	plasma membrane intrinsic protein 2A
A.E	Pavir.Bb01498.1.p|PACid:30301462	Pavir.Bb01498.1	10.1644711	3.345463246	0.003093	30301462	Pavir.Bb01498.1	LOC_Os09g15810.1	bifunctional protein folD, putative, expressed	AT2G38660.1	Amino acid dehydrogenase family protein
A.E	Pavir.Bb01701.1.p|PACid:30301373	Pavir.Bb01701.1	0.2387642	-2.066341587	0.004125	30301373	Pavir.Bb01701.1	LOC_Os09g39490.1	histone-like transcription factor and archaeal histone, putative, expressed	AT2G27470.1	nuclear factor Y, subunit B11
A.E	Pavir.Bb01815.1.p|PACid:30298603	Pavir.Bb01815.1	2.65572594	1.409106273	0.000848	30298603	Pavir.Bb01815.1	LOC_Os09g09470.1	WD domain, G-beta repeat domain containing protein, expressed	AT5G05970.2	Transducin/WD40 repeat-like superfamily protein
A.E	Pavir.Bb02160.1.p|PACid:30298465	Pavir.Bb02160.1	3.49038316	1.803385418	0.001406	30298465	Pavir.Bb02160.1	LOC_Os09g24540.1	peptidyl-prolyl cis-trans isomerase, putative, expressed	AT1G26550.1	FKBP-like peptidyl-prolyl cis-trans isomerase family protein
A.E	Pavir.Bb02205.1.p|PACid:30300539	Pavir.Bb02205.1	4.21808615	2.076588561	0.040275	30300539	Pavir.Bb02205.1	LOC_Os09g25490.1	CESA9 - cellulose synthase, expressed	AT5G17420.1	Cellulose synthase family protein
A.E	Pavir.Bb02286.1.p|PACid:30298931	Pavir.Bb02286.1	2.69383861	1.429663419	0.000281	30298931	Pavir.Bb02286.1	LOC_Os09g28720.1	alpha/beta hydrolase fold, putative, expressed	AT3G48690.1	alpha/beta-Hydrolases superfamily protein
A.E	Pavir.Bb02338.3.p|PACid:30299761	Pavir.Bb02338.3	0.30994062	-1.689936263	0.001954	30299761	Pavir.Bb02338.3	LOC_Os09g28570.1	zinc-binding alcohol dehydrogenase domain-containing protein 2, putative, expressed	AT1G49670.1	ARP protein (REF)
A.E	Pavir.Bb02676.1.p|PACid:30301409	Pavir.Bb02676.1	0.32358613	-1.627778308	0.00318	30301409	Pavir.Bb02676.1	LOC_Os09g36770.1	NTMC2Type1.2 protein, putative, expressed	AT2G20990.1	synaptotagmin A
A.E	Pavir.Bb02918.1.p|PACid:30300877	Pavir.Bb02918.1	2.77910953	1.474622697	6.81e-05	30300877	Pavir.Bb02918.1	LOC_Os07g36200.1	eukaryotic translation initiation factor-related, putative, expressed	AT1G11480.1	eukaryotic translation initiation factor-related
A.E	Pavir.Bb03551.1.p|PACid:30299381	Pavir.Bb03551.1	2.53995169	1.344801059	0.00354	30299381	Pavir.Bb03551.1	LOC_Os07g46370.1	WD domain, G-beta repeat domain containing protein, expressed	AT3G63460.1	transducin family protein / WD-40 repeat family protein
A.E	Pavir.Bb03603.1.p|PACid:30297743	Pavir.Bb03603.1	0.39449791	-1.341910456	0.003076	30297743	Pavir.Bb03603.1	LOC_Os07g48010.1	peroxidase precursor, putative, expressed	AT5G05340.1	Peroxidase superfamily protein
A.E	Pavir.Bb03607.1.p|PACid:30301665	Pavir.Bb03607.1	0.36287938	-1.462438026	0.000136	30301665	Pavir.Bb03607.1	LOC_Os07g47830.1	pectinesterase, putative, expressed	AT4G02320.1	Plant invertase/pectin methylesterase inhibitor superfamily
A.E	Pavir.Bb03674.1.p|PACid:30298083	Pavir.Bb03674.1	3.13124556	1.64673665	0.009006	30298083	Pavir.Bb03674.1	LOC_Os07g47500.1	histone-arginine methyltransferase CARM1, putative, expressed	AT3G06930.2	protein arginine methyltransferase 4B
A.E	Pavir.Bb03677.1.p|PACid:30296872	Pavir.Bb03677.1	4.30108573	2.104700888	0.007625	30296872	Pavir.Bb03677.1	LOC_Os07g47530.1	AAA-type ATPase family protein, putative, expressed	AT4G02480.1	AAA-type ATPase family protein
A.E	Pavir.Bb03687.1.p|PACid:30299828	Pavir.Bb03687.1	0.32516576	-1.620752751	0.001617	30299828	Pavir.Bb03687.1	LOC_Os07g47700.1	NAD dependent epimerase/dehydratase family domain containing protein, expressed	AT3G62830.1	NAD(P)-binding Rossmann-fold superfamily protein
A.E	Pavir.Ca00431.1.p|PACid:30205375	Pavir.Ca00431.1	2.83254005	1.502096357	0.002374	30205375	Pavir.Ca00431.1	LOC_Os12g14070.1	DnaK family protein, putative, expressed	AT4G24280.1	chloroplast heat shock protein 70-1
A.E	Pavir.Ca00506.1.p|PACid:30206464	Pavir.Ca00506.1	3.49272969	1.804354993	0.001019	30206464	Pavir.Ca00506.1	LOC_Os05g11910.1	GDSL-like lipase/acylhydrolase, putative, expressed	AT5G45910.1	GDSL-like Lipase/Acylhydrolase superfamily protein
A.E	Pavir.Ca00832.1.p|PACid:30204776	Pavir.Ca00832.1	3.16182306	1.660756634	0.027504	30204776	Pavir.Ca00832.1	LOC_Os05g01300.1	expressed protein	AT4G12340.1	copper ion binding
A.E	Pavir.Ca00837.1.p|PACid:30203971	Pavir.Ca00837.1	0.2271188	-2.138480995	0.00344	30203971	Pavir.Ca00837.1	LOC_Os05g01270.1	peptidyl-prolyl cis-trans isomerase, putative, expressed	AT5G13120.1	cyclophilin 20-2
A.E	Pavir.Ca00886.1.p|PACid:30204487	Pavir.Ca00886.1	3.65438246	1.869627632	0.045775	30204487	Pavir.Ca00886.1	LOC_Os05g48240.1	dynamin family protein, putative, expressed	AT5G42080.1	dynamin-like protein
A.E	Pavir.Ca00893.1.p|PACid:30206111	Pavir.Ca00893.1	3.26433521	1.706789213	0.00373	30206111	Pavir.Ca00893.1	LOC_Os05g48370.1	expressed protein	AT4G21700.1	Protein of unknown function (DUF2921)
A.E	Pavir.Ca00963.1.p|PACid:30203700	Pavir.Ca00963.1	2.60338942	1.38039113	0.004859	30203700	Pavir.Ca00963.1	LOC_Os05g49380.1	OsDegp9 - Putative Deg protease homologue, expressed	AT3G27925.1	DegP protease 1
A.E	Pavir.Ca00973.1.p|PACid:30206033	Pavir.Ca00973.1	0.37827995	-1.402473773	0.042882	30206033	Pavir.Ca00973.1	LOC_Os05g49800.1	ketol-acid reductoisomerase, chloroplast precursor, putative, expressed	AT3G58610.1	ketol-acid reductoisomerase
A.E	Pavir.Ca01169.1.p|PACid:30204454	Pavir.Ca01169.1	3.83286273	1.938422329	0.004984	30204454	Pavir.Ca01169.1	LOC_Os05g48330.1	aspartyl protease family protein, putative, expressed	AT3G12700.1	Eukaryotic aspartyl protease family protein
A.E	Pavir.Ca01218.1.p|PACid:30203374	Pavir.Ca01218.1	4.59971741	2.201545228	0.002905	30203374	Pavir.Ca01218.1	LOC_Os09g07830.3	acetyl-CoA acetyltransferase, cytosolic, putative, expressed	AT5G48230.2	acetoacetyl-CoA thiolase 2
A.E	Pavir.Ca01530.1.p|PACid:30203834	Pavir.Ca01530.1	0.360773	-1.470836737	0.009076	30203834	Pavir.Ca01530.1	LOC_Os05g45660.2	plasminogen activator inhibitor 1 RNA-binding protein, putative, expressed	AT4G16830.1	Hyaluronan / mRNA binding family
A.E	Pavir.Ca01759.1.p|PACid:30205205	Pavir.Ca01759.1	0.36518451	-1.453302522	0.019822	30205205	Pavir.Ca01759.1	LOC_Os05g46230.1	NAP domain containing protein, putative, expressed	AT2G19480.1	nucleosome assembly protein 1;2
A.E	Pavir.Ca01872.1.p|PACid:30203224	Pavir.Ca01872.1	8.25811573	3.045812636	0.001306	30203224	Pavir.Ca01872.1	LOC_Os05g45830.1	expressed protein	AT1G80000.1	CASC3/Barentsz eIF4AIII binding
A.E	Pavir.Ca01894.1.p|PACid:30207162	Pavir.Ca01894.1	3.62418128	1.857655118	0.00443	30207162	Pavir.Ca01894.1	LOC_Os12g30540.1	ubiquitin carboxyl-terminal hydrolase, putative, expressed	AT5G06600.1	ubiquitin-specific protease 12
A.E	Pavir.Ca01955.1.p|PACid:30205276	Pavir.Ca01955.1	3.03640324	1.602363394	0.005636	30205276	Pavir.Ca01955.1	LOC_Os07g28260.4	expressed protein	AT5G61450.1	P-loop containing nucleoside triphosphate hydrolases superfamily protein
A.E	Pavir.Ca02112.1.p|PACid:30206985	Pavir.Ca02112.1	7.16056904	2.840074242	0.000632	30206985	Pavir.Ca02112.1	LOC_Os12g27070.1	heat shock protein DnaJ, putative, expressed	AT5G06410.1	DNAJ heat shock N-terminal domain-containing protein
A.E	Pavir.Ca02850.1.p|PACid:30204015	Pavir.Ca02850.1	0.34958615	-1.516280062	0.007372	30204015	Pavir.Ca02850.1	LOC_Os03g44300.1	transketolase, putative, expressed	AT1G30120.1	pyruvate dehydrogenase E1 beta
A.E	Pavir.Cb00986.1.p|PACid:30268037	Pavir.Cb00986.1	3.54155875	1.824384473	0.000738	30268037	Pavir.Cb00986.1	LOC_Os09g04730.1	dehydrogenase/reductase SDR family member 2, putative, expressed	AT4G05530.1	indole-3-butyric acid response 1
A.E	Pavir.Cb00991.1.p|PACid:30267881	Pavir.Cb00991.1	3.59207177	1.844816176	0.006228	30267881	Pavir.Cb00991.1	LOC_Os12g22030.1	serine hydroxymethyltransferase, mitochondrial precursor, putative, expressed	AT4G13930.1	serine hydroxymethyltransferase 4
A.E	Pavir.Cb01090.1.p|PACid:30267976	Pavir.Cb01090.1	5.89718925	2.560027493	0.000108	30267976	Pavir.Cb01090.1	LOC_Os12g17910.1	T-complex protein, putative, expressed	AT2G28000.1	chaperonin-60alpha
A.E	Pavir.Cb01681.1.p|PACid:30268409	Pavir.Cb01681.1	6.42814645	2.684402797	0.000252	30268409	Pavir.Cb01681.1	LOC_Os05g32570.1	RING E3 ligase protein, putative, expressed	AT5G13530.1	protein kinases;ubiquitin-protein ligases
A.E	Pavir.Cb01702.1.p|PACid:30268267	Pavir.Cb01702.1	2.90632129	1.5391942	0.010728	30268267	Pavir.Cb01702.1	LOC_Os03g54890.1	ribosomal protein L13, putative, expressed	AT5G48760.1	Ribosomal protein L13 family protein
A.E	Pavir.Cb01826.1.p|PACid:30267697	Pavir.Cb01826.1	2.94590835	1.558712546	0.000733	30267697	Pavir.Cb01826.1	LOC_Os12g12850.1	ATP-dependent Clp protease ATP-binding subunit clpA homolog,chloroplast precursor, putative, expressed	AT5G50920.1	CLPC homologue 1
A.E	Pavir.Cb01901.1.p|PACid:30270054	Pavir.Cb01901.1	0.39654453	-1.334445221	0.006797	30270054	Pavir.Cb01901.1	LOC_Os12g10320.1	plant-specific domain TIGR01627 family protein, expressed	AT1G33800.1	Protein of unknown function (DUF579)
A.E	Pavir.Cb02019.1.p|PACid:30267516	Pavir.Cb02019.1	3.42538237	1.776265043	0.001616	30267516	Pavir.Cb02019.1	LOC_Os12g06810.1	WD domain, G-beta repeat domain containing protein, expressed	AT3G05090.1	Transducin/WD40 repeat-like superfamily protein
A.E	Pavir.Da00112.1.p|PACid:30193365	Pavir.Da00112.1	0.3000297	-1.736822782	0.015731	30193365	Pavir.Da00112.1	LOC_Os02g06450.1	coiled-coil domain-containing protein 72, putative, expressed	AT1G15270.1	Translation machinery associated TMA7
A.E	Pavir.Da00122.1.p|PACid:30191872	Pavir.Da00122.1	0.29058489	-1.782968421	0.025865	30191872	Pavir.Da00122.1	LOC_Os09g07020.1	oxidoreductase, putative, expressed	AT3G50210.1	2-oxoglutarate (2OG) and Fe(II)-dependent oxygenase superfamily protein
A.E	Pavir.Da00533.1.p|PACid:30192387	Pavir.Da00533.1	2.57103144	1.362347251	0.004071	30192387	Pavir.Da00533.1	LOC_Os06g36770.2	serine/threonine protein phosphatase 2A 55 kDa regulatory subunit B, putative, expressed	AT1G17720.2	Protein phosphatase 2A, regulatory subunit PR55
A.E	Pavir.Da00645.1.p|PACid:30192796	Pavir.Da00645.1	2.58770716	1.371674365	0.012978	30192796	Pavir.Da00645.1	LOC_Os01g40860.1	aldehyde dehydrogenase, putative, expressed	AT3G24503.1	aldehyde dehydrogenase 2C4
A.E	Pavir.Da00726.1.p|PACid:30194254	Pavir.Da00726.1	13.7313633	3.779402965	0.008246	30194254	Pavir.Da00726.1	LOC_Os06g37080.1	L-ascorbate oxidase precursor, putative, expressed	AT5G21105.1	Plant L-ascorbate oxidase
A.E	Pavir.Da00781.1.p|PACid:30191907	Pavir.Da00781.1	0.39919171	-1.324846347	0.000591	30191907	Pavir.Da00781.1	LOC_Os06g36670.1	bet v I allergen family protein, putative, expressed	AT2G26040.1	PYR1-like 2
A.E	Pavir.Da00799.1.p|PACid:30191507	Pavir.Da00799.1	2.81100202	1.491084492	0.008595	30191507	Pavir.Da00799.1	LOC_Os06g27560.1	glycosyltransferase protein, putative, expressed	AT3G18170.1	Glycosyltransferase family 61 protein
A.E	Pavir.Da00984.1.p|PACid:30194329	Pavir.Da00984.1	5.99035492	2.582641483	0.00173	30194329	Pavir.Da00984.1	LOC_Os06g24704.1	acyl-coenzyme A oxidase, putative, expressed	AT1G06290.1	acyl-CoA oxidase 3
A.E	Pavir.Da01210.1.p|PACid:30193057	Pavir.Da01210.1	4.43123433	2.14770862	0.002345	30193057	Pavir.Da01210.1	LOC_Os06g13820.1	dynamin, putative, expressed	AT1G10290.1	dynamin-like protein 6
A.E	Pavir.Da01222.1.p|PACid:30191619	Pavir.Da01222.1	2.81794572	1.494643821	0.002931	30191619	Pavir.Da01222.1	LOC_Os06g14080.1	ATMAP70 protein, putative, expressed	AT1G24764.1	microtubule-associated proteins 70-2
A.E	Pavir.Da01329.1.p|PACid:30192433	Pavir.Da01329.1	8.74225217	3.128004993	0.000686	30192433	Pavir.Da01329.1	LOC_Os12g30020.1	cyclin-T1-4, putative, expressed	AT4G19600.1	Cyclin family protein
A.E	Pavir.Da01451.1.p|PACid:30193985	Pavir.Da01451.1	4.43326673	2.148370165	0.001758	30193985	Pavir.Da01451.1	LOC_Os06g22140.1	thioredoxin reductase 2, putative, expressed	AT2G17420.1	NADPH-dependent thioredoxin reductase A
A.E	Pavir.Da01938.1.p|PACid:30192950	Pavir.Da01938.1	2.71920134	1.44318298	0.004821	30192950	Pavir.Da01938.1	LOC_Os02g52950.1	expressed protein	AT1G66420.1	DNA-binding storekeeper protein-related transcriptional regulator
A.E	Pavir.Da02420.1.p|PACid:30193813	Pavir.Da02420.1	0.22625915	-2.143951936	0.006732					AT1G59760.1	RNA helicase, ATP-dependent, SK12/DOB1 protein
A.E	Pavir.Da02432.1.p|PACid:30194470	Pavir.Da02432.1	3.02372956	1.596329113	0.00262	30194470	Pavir.Da02432.1	LOC_Os06g01410.1	glutamine cyclotransferase precursor, putative, expressed	AT4G25720.1	glutaminyl cyclase
A.E	Pavir.Db00161.1.p|PACid:30261419	Pavir.Db00161.1	0.31850945	-1.650591902	8.95e-05
A.E	Pavir.Db00344.1.p|PACid:30262438	Pavir.Db00344.1	3.87566111	1.954442425	0.017045	30262438	Pavir.Db00344.1	LOC_Os06g47000.1	external NADH-ubiquinone oxidoreductase 1, mitochondrial precursor, putative, expressed	AT4G05020.1	NAD(P)H dehydrogenase B2
A.E	Pavir.Db00930.1.p|PACid:30259971	Pavir.Db00930.1	0.25756174	-1.957009797	0.000628	30259971	Pavir.Db00930.1	LOC_Os06g12220.1	HVA22, putative, expressed	AT1G74520.1	HVA22 homologue A
A.E	Pavir.Db01183.1.p|PACid:30261344	Pavir.Db01183.1	2.56265627	1.357639983	1.89e-05
A.E	Pavir.Db01268.1.p|PACid:30263221	Pavir.Db01268.1	3.09994853	1.632244262	0.002204	30263221	Pavir.Db01268.1	LOC_Os06g37180.1	ATP synthase, putative, expressed	AT4G38510.5	ATPase, V1 complex, subunit B protein
A.E	Pavir.Db01331.1.p|PACid:30261653	Pavir.Db01331.1	0.3927337	-1.348376701	0.027403					AT5G63630.1	P-loop containing nucleoside triphosphate hydrolases superfamily protein
A.E	Pavir.Db01499.1.p|PACid:30261975	Pavir.Db01499.1	0.35532581	-1.492785592	0.00379	30261975	Pavir.Db01499.1	LOC_Os06g23160.1	bacterial transferase hexapeptide domain containing protein, expressed	AT5G19485.1	transferases;nucleotidyltransferases
A.E	Pavir.Db01882.1.p|PACid:30262056	Pavir.Db01882.1	0.29233817	-1.774289887	0.010893	30262056	Pavir.Db01882.1	LOC_Os06g11135.1	gibberellin receptor GID1L2, putative, expressed	AT1G47480.1	alpha/beta-Hydrolases superfamily protein
A.E	Pavir.Db02085.1.p|PACid:30262143	Pavir.Db02085.1	7.83397687	2.96974487	0.003576	30262143	Pavir.Db02085.1	LOC_Os02g02870.1	glycine-rich protein 2, putative, expressed	AT4G38680.1	glycine rich protein 2
A.E	Pavir.Db02161.1.p|PACid:30260395	Pavir.Db02161.1	2.99794074	1.583971866	0.00457	30260395	Pavir.Db02161.1	LOC_Os06g06030.1	peptidase, T1 family, putative, expressed	AT1G13060.1	20S proteasome beta subunit E1
A.E	Pavir.Db02495.1.p|PACid:30262754	Pavir.Db02495.1	2.67917029	1.421786281	4.67e-05	30262754	Pavir.Db02495.1	LOC_Os06g01200.1	zinc finger, C3HC4 type domain containing protein, expressed	AT3G19950.1	RING/U-box superfamily protein
A.E	Pavir.Ea00018.1.p|PACid:30231479	Pavir.Ea00018.1	3.91255576	1.968111312	0.007317	30231479	Pavir.Ea00018.1	LOC_Os01g13700.1	DNA-binding protein-related, putative, expressed	AT2G33845.1	Nucleic acid-binding, OB-fold-like protein
A.E	Pavir.Ea00070.1.p|PACid:30227912	Pavir.Ea00070.1	3.35995934	1.748443776	0.038242	30227912	Pavir.Ea00070.1	LOC_Os01g11810.2	powdery mildew resistant protein 5, putative, expressed	AT1G29050.1	TRICHOME BIREFRINGENCE-LIKE 38
A.E	Pavir.Ea00483.1.p|PACid:30230738	Pavir.Ea00483.1	2.92235784	1.547132847	0.00233	30230738	Pavir.Ea00483.1	LOC_Os01g05610.1	Core histone H2A/H2B/H3/H4 domain containing protein, putative, expressed	AT5G59910.1	Histone superfamily protein
A.E	Pavir.Ea00565.1.p|PACid:30225986	Pavir.Ea00565.1	4.87731187	2.286086226	7.85e-05	30225986	Pavir.Ea00565.1	LOC_Os05g01600.1	actin, putative, expressed	AT3G12380.2	actin-related protein 5
A.E	Pavir.Ea00755.1.p|PACid:30229058	Pavir.Ea00755.1	3.24590146	1.698619202	0.000336	30229058	Pavir.Ea00755.1	LOC_Os04g55850.1	nuclease PA3, putative, expressed	AT1G68290.1	endonuclease 2
A.E	Pavir.Ea00792.1.p|PACid:30228378	Pavir.Ea00792.1	2.52853452	1.338301476	0.04598	30228378	Pavir.Ea00792.1	LOC_Os01g01700.1	anaphase-promoting complex subunit 11, putative, expressed	AT5G20570.1	RING-box 1
A.E	Pavir.Ea00838.1.p|PACid:30228492	Pavir.Ea00838.1	2.74569109	1.457169319	0.004915	30228492	Pavir.Ea00838.1	LOC_Os02g55200.1	expressed protein	AT3G54360.1	zinc ion binding
A.E	Pavir.Ea00990.1.p|PACid:30231115	Pavir.Ea00990.1	4.63441491	2.212387211	0.041051	30231115	Pavir.Ea00990.1	LOC_Os05g28750.1	60S ribosomal protein L29-2, putative, expressed	AT3G06680.1	Ribosomal L29e protein family
A.E	Pavir.Ea01235.1.p|PACid:30229836	Pavir.Ea01235.1	4.11161051	2.039703605	0.002317	30229836	Pavir.Ea01235.1	LOC_Os01g21960.1	serine/threonine-protein kinase, putative, expressed	AT1G56720.1	Protein kinase superfamily protein
A.E	Pavir.Ea01580.1.p|PACid:30229740	Pavir.Ea01580.1	0.19456728	-2.361658955	0.027834	30229740	Pavir.Ea01580.1	LOC_Os01g40200.2	XIK, putative, expressed	AT5G20490.1	Myosin family protein with Dil domain
A.E	Pavir.Ea01874.1.p|PACid:30230890	Pavir.Ea01874.1	0.352007	-1.506323986	0.030191	30230890	Pavir.Ea01874.1	LOC_Os01g37980.1	vesicle transport v-SNARE protein, putative, expressed	AT5G39510.1	Vesicle transport v-SNARE family protein
A.E	Pavir.Ea02098.1.p|PACid:30226358	Pavir.Ea02098.1	2.5090993	1.327169567	0.001076	30226358	Pavir.Ea02098.1	LOC_Os05g18750.1	ribosomal protein L25, putative, expressed	AT4G23620.1	Ribosomal protein L25/Gln-tRNA synthetase, anti-codon-binding domain
A.E	Pavir.Ea02335.1.p|PACid:30231084	Pavir.Ea02335.1	5.17730086	2.372200157	0.015226	30231084	Pavir.Ea02335.1	LOC_Os01g47330.1	ribosomal protein L7/L12 C-terminal domain containing protein, expressed	AT3G27830.1	ribosomal protein L12-A
A.E	Pavir.Ea02372.1.p|PACid:30230779	Pavir.Ea02372.1	0.39700576	-1.332768164	0.026188
A.E	Pavir.Ea02384.1.p|PACid:30231202	Pavir.Ea02384.1	3.07140506	1.618898788	0.03201
A.E	Pavir.Ea02791.1.p|PACid:30228403	Pavir.Ea02791.1	3.4154842	1.77209012	0.001141	30228403	Pavir.Ea02791.1	LOC_Os01g55700.1	NLI interacting factor-like phosphatase, putative, expressed	AT1G55900.1	Haloacid dehalogenase-like hydrolase (HAD) superfamily protein
A.E	Pavir.Ea03038.1.p|PACid:30226651	Pavir.Ea03038.1	2.83588689	1.50379999	0.011093	30226651	Pavir.Ea03038.1	LOC_Os01g61160.1	laccase precursor protein, putative, expressed	AT5G05390.1	laccase 12
A.E	Pavir.Ea03092.1.p|PACid:30228730	Pavir.Ea03092.1	4.01009935	2.00363798	0.007782	30228730	Pavir.Ea03092.1	LOC_Os04g34100.1	expressed protein	AT1G47420.1	succinate dehydrogenase 5
A.E	Pavir.Eb00139.1.p|PACid:30311371	Pavir.Eb00139.1	3.1059033	1.635012911	0.019375	30311371	Pavir.Eb00139.1	LOC_Os01g13100.1	KH domain containing protein, putative, expressed	AT3G16230.2	Predicted eukaryotic LigT
A.E	Pavir.Eb00174.1.p|PACid:30311106	Pavir.Eb00174.1	3.59614782	1.846452326	0.001947	30311106	Pavir.Eb00174.1	LOC_Os01g12260.1	vacuolar ATP synthase subunit E, putative, expressed	AT1G64200.1	vacuolar H+-ATPase subunit E isoform 3
A.E	Pavir.Eb00322.1.p|PACid:30313092	Pavir.Eb00322.1	6.6032956	2.72318623	0.001727	30313092	Pavir.Eb00322.1	LOC_Os01g09010.1	transferase family protein, putative, expressed	AT3G62160.1	HXXXD-type acyl-transferase family protein
A.E	Pavir.Eb00467.1.p|PACid:30310583	Pavir.Eb00467.1	3.5200806	1.815608463	0.003737
A.E	Pavir.Eb00480.1.p|PACid:30313783	Pavir.Eb00480.1	2.66202475	1.412523985	4.34e-05	30313783	Pavir.Eb00480.1	LOC_Os01g07200.1	staphylococcal nuclease homologue, putative, expressed	AT3G56170.1	Ca-2+ dependent nuclease
A.E	Pavir.Eb00648.1.p|PACid:30309840	Pavir.Eb00648.1	3.46007214	1.790802117	0.00065	30309840	Pavir.Eb00648.1	LOC_Os01g03950.1	glycosyl hydrolase, family 31, putative, expressed	AT1G68560.1	alpha-xylosidase 1
A.E	Pavir.Eb01138.1.p|PACid:30309135	Pavir.Eb01138.1	0.32713836	-1.612027167	0.007061	30309135	Pavir.Eb01138.1	LOC_Os01g16870.1	argonaute, putative, expressed	AT2G27040.1	Argonaute family protein
A.E	Pavir.Eb01696.1.p|PACid:30311392	Pavir.Eb01696.1	0.31417572	-1.670356423	0.001204	30311392	Pavir.Eb01696.1	LOC_Os02g14780.1	splicing factor 3 subunit 1, putative, expressed	AT1G14650.1	SWAP (Suppressor-of-White-APricot)/surp domain-containing protein / ubiquitin family protein
A.E	Pavir.Eb01887.1.p|PACid:30309087	Pavir.Eb01887.1	2.64210081	1.401685513	0.006889	30309087	Pavir.Eb01887.1	LOC_Os01g40870.1	aldehyde dehydrogenase, putative, expressed	AT3G24503.1	aldehyde dehydrogenase 2C4
A.E	Pavir.Eb01933.1.p|PACid:30312897	Pavir.Eb01933.1	2.92728734	1.549564364	0.002216	30312897	Pavir.Eb01933.1	LOC_Os01g43090.1	oxidoreductase, aldo/keto reductase family protein, putative, expressed	AT1G60750.1	NAD(P)-linked oxidoreductase superfamily protein
A.E	Pavir.Eb01973.1.p|PACid:30311959	Pavir.Eb01973.1	0.26466495	-1.917760935	0.036611	30311959	Pavir.Eb01973.1	LOC_Os01g41190.1	glycine-rich protein, putative, expressed	AT1G80000.1	CASC3/Barentsz eIF4AIII binding
A.E	Pavir.Eb01994.1.p|PACid:30312180	Pavir.Eb01994.1	0.3643869	-1.45645702	0.021922	30312180	Pavir.Eb01994.1	LOC_Os01g41630.1	serine/threonine protein phosphatase 2A 55 kDa regulatory subunit B, putative, expressed	AT1G17720.1	Protein phosphatase 2A, regulatory subunit PR55
A.E	Pavir.Eb02153.1.p|PACid:30311877	Pavir.Eb02153.1	2.61518888	1.386915147	0.006508	30311877	Pavir.Eb02153.1	LOC_Os01g31470.1	mov34/MPN/PAD-1 family protein, expressed	AT4G16144.1	associated molecule with the SH3 domain of STAM 3
A.E	Pavir.Eb02206.1.p|PACid:30310315	Pavir.Eb02206.1	17.6713432	4.143339799	0.003658	30310315	Pavir.Eb02206.1	LOC_Os01g22370.1	peroxidase precursor, putative, expressed	AT5G42180.1	Peroxidase superfamily protein
A.E	Pavir.Eb02299.1.p|PACid:30310744	Pavir.Eb02299.1	6.57963841	2.718008302	0.009058	30310744	Pavir.Eb02299.1	LOC_Os01g04730.1	ribosomal protein L24, putative, expressed	AT3G49910.1	Translation protein SH3-like family protein
A.E	Pavir.Eb02543.1.p|PACid:30314096	Pavir.Eb02543.1	2.80617503	1.488604999	0.000625	30314096	Pavir.Eb02543.1	LOC_Os01g36240.1	peroxidase precursor, putative, expressed	AT5G66390.1	Peroxidase superfamily protein
A.E	Pavir.Eb03131.1.p|PACid:30313071	Pavir.Eb03131.1	3.14387617	1.652544396	0.033112	30313071	Pavir.Eb03131.1	LOC_Os01g54480.1	serine/threonine protein kinase, putative, expressed	AT3G58760.1	Integrin-linked protein kinase family
A.E	Pavir.Eb03441.1.p|PACid:30313872	Pavir.Eb03441.1	5.52565249	2.466144834	0.011299	30313872	Pavir.Eb03441.1	LOC_Os01g57880.1	plastocyanin-like domain containing protein, putative, expressed	AT3G20570.1	early nodulin-like protein 9
A.E	Pavir.Eb03656.1.p|PACid:30310604	Pavir.Eb03656.1	2.73745713	1.452836374	0.006024	30310604	Pavir.Eb03656.1	LOC_Os01g62040.1	ruvB-like, putative, expressed	AT5G22330.1	P-loop containing nucleoside triphosphate hydrolases superfamily protein
A.E	Pavir.Eb03854.1.p|PACid:30309915	Pavir.Eb03854.1	3.25292122	1.701735882	0.001389
A.E	Pavir.Eb03975.1.p|PACid:30314070	Pavir.Eb03975.1	0.33375332	-1.583145924	0.005836	30314070	Pavir.Eb03975.1	LOC_Os05g28200.1	prenyltransferase, putative, expressed	AT3G51820.1	UbiA prenyltransferase family protein
A.E	Pavir.Eb03978.1.p|PACid:30310355	Pavir.Eb03978.1	2.90143839	1.536768297	0.006396	30310355	Pavir.Eb03978.1	LOC_Os05g01540.2	serine/arginine repetitive matrix protein 1, putative, expressed	AT1G16610.3	arginine/serine-rich 45
A.E	Pavir.Fa00058.1.p|PACid:30188130	Pavir.Fa00058.1	2.4979402	1.320738941	0.00171	30188130	Pavir.Fa00058.1	ChrSy.fgenesh.mRNA.22	expressed protein	AT3G01410.1	Polynucleotidyl transferase, ribonuclease H-like superfamily protein
A.E	Pavir.Fa00212.1.p|PACid:30186437	Pavir.Fa00212.1	0.27877056	-1.842849879	0.001712	30186437	Pavir.Fa00212.1	LOC_Os08g43640.1	26S proteasome non-ATPase regulatory subunit 3, putative, expressed	AT1G20200.1	PAM domain (PCI/PINT associated module) protein
A.E	Pavir.Fa00399.1.p|PACid:30188436	Pavir.Fa00399.1	2.64569616	1.40364739	0.022343	30188436	Pavir.Fa00399.1	LOC_Os08g41300.1	60S ribosomal protein L32, putative, expressed	AT4G18100.1	Ribosomal protein L32e
A.E	Pavir.Fa00409.1.p|PACid:30186092	Pavir.Fa00409.1	0.33092236	-1.595435301	0.012179	30186092	Pavir.Fa00409.1	LOC_Os08g41290.1	AIR12, putative, expressed	AT3G07390.1	auxin-responsive family protein
A.E	Pavir.Fa00423.1.p|PACid:30187768	Pavir.Fa00423.1	3.70900813	1.891033431	0.000176	30187768	Pavir.Fa00423.1	LOC_Os09g31380.1	jmjC domain-containing protein 5, putative, expressed	AT3G20810.3	2-oxoglutarate (2OG) and Fe(II)-dependent oxygenase superfamily protein
A.E	Pavir.Fa00907.1.p|PACid:30185552	Pavir.Fa00907.1	4.15341885	2.054299367	0.005745	30185552	Pavir.Fa00907.1	LOC_Os08g34060.1	DUF1336 domain containing protein, expressed	AT5G35180.2	Protein of unknown function (DUF1336)
A.E	Pavir.Fa01415.1.p|PACid:30187067	Pavir.Fa01415.1	4.04266487	2.015306613	0.00083	30187067	Pavir.Fa01415.1	LOC_Os08g16600.1	WD-40 repeat protein family, putative, expressed	AT4G30840.1	Transducin/WD40 repeat-like superfamily protein
A.E	Pavir.Fa02007.1.p|PACid:30187803	Pavir.Fa02007.1	3.68928873	1.883342703	0.00311	30187803	Pavir.Fa02007.1	LOC_Os11g27370.1	UDP-glucoronosyl and UDP-glucosyl transferase domain containing protein, expressed	AT5G54060.1	UDP-glucose:flavonoid 3-o-glucosyltransferase
A.E	Pavir.Fa02320.1.p|PACid:30187689	Pavir.Fa02320.1	3.25063877	1.700723244	0.011877	30187689	Pavir.Fa02320.1	LOC_Os08g03290.1	glyceraldehyde-3-phosphate dehydrogenase, putative, expressed	AT3G04120.1	glyceraldehyde-3-phosphate dehydrogenase C subunit 1
A.E	Pavir.Fb00175.1.p|PACid:30278974	Pavir.Fb00175.1	0.22846705	-2.129941956	0.00409	30278974	Pavir.Fb00175.1	LOC_Os01g08310.1	serine/threonine protein phosphatase 2A 59 kDa regulatory subunit Bgamma isoform, putative, expressed	AT4G15415.1	Protein phosphatase 2A regulatory B subunit family protein
A.E	Pavir.Fb00702.1.p|PACid:30279569	Pavir.Fb00702.1	2.94140989	1.556507842	0.011832	30279569	Pavir.Fb00702.1	LOC_Os09g32976.1	ribosomal protein L7Ae, putative, expressed	AT2G47610.1	Ribosomal protein L7Ae/L30e/S12e/Gadd45 family protein
A.E	Pavir.Fb00898.1.p|PACid:30278751	Pavir.Fb00898.1	6.58165766	2.718450987	0.000654	30278751	Pavir.Fb00898.1	LOC_Os08g24790.1	AIR12, putative, expressed	AT5G47530.1	Auxin-responsive family protein
A.E	Pavir.Fb01376.1.p|PACid:30279581	Pavir.Fb01376.1	2.66788847	1.415698358	0.001743	30279581	Pavir.Fb01376.1	LOC_Os08g28680.1	ubiquitin-conjugating enzyme, putative, expressed	AT2G18600.1	Ubiquitin-conjugating enzyme family protein
A.E	Pavir.Fb01856.2.p|PACid:30279865	Pavir.Fb01856.2	2.86014158	1.516086563	0.029175	30279865	Pavir.Fb01856.2	LOC_Os08g38900.1	caffeoyl-CoA O-methyltransferase, putative, expressed	AT4G34050.1	S-adenosyl-L-methionine-dependent methyltransferases superfamily protein
A.E	Pavir.Fb02201.1.p|PACid:30278732	Pavir.Fb02201.1	5.17617417	2.371886163	0.020164	30278732	Pavir.Fb02201.1	LOC_Os12g44390.1	RecF/RecN/SMC N terminal domain containing protein, expressed	AT3G54670.1	Structural maintenance of chromosomes (SMC) family protein
A.E	Pavir.Ga00273.1.p|PACid:30305363	Pavir.Ga00273.1	5.20797493	2.380722504	0.00943	30305363	Pavir.Ga00273.1	LOC_Os04g58280.2	stem-specific protein TSJT1, putative, expressed	AT4G27450.1	Aluminium induced protein with YGL and LRDR motifs
A.E	Pavir.Ga00516.1.p|PACid:30305119	Pavir.Ga00516.1	0.36966748	-1.435699953	0.002744	30305119	Pavir.Ga00516.1	LOC_Os04g58580.1	phosphomannomutase, putative, expressed	AT2G45790.1	phosphomannomutase
A.E	Pavir.Ga00873.1.p|PACid:30305703	Pavir.Ga00873.1	5.61067251	2.488173705	0.011729	30305703	Pavir.Ga00873.1	LOC_Os04g44910.1	receptor like protein kinase, putative, expressed	AT2G37710.1	receptor lectin kinase
A.E	Pavir.Ga01013.1.p|PACid:30303888	Pavir.Ga01013.1	3.15332907	1.65687573	0.001511	30303888	Pavir.Ga01013.1	LOC_Os04g47860.5	ZOS4-11 - C2H2 zinc finger protein, expressed	AT2G02070.1	indeterminate(ID)-domain 5
A.E	Pavir.Ga01426.1.p|PACid:30305266	Pavir.Ga01426.1	3.94067397	1.978442394	0.014456	30305266	Pavir.Ga01426.1	LOC_Os04g39100.1	peroxidase precursor, putative, expressed	AT5G47000.1	Peroxidase superfamily protein
A.E	Pavir.Ga01433.1.p|PACid:30303016	Pavir.Ga01433.1	32.1734993	5.007800952	0.00015	30303016	Pavir.Ga01433.1	LOC_Os04g39040.1	UBA and UBX domain-containing protein, putative, expressed	AT4G04210.1	plant UBX domain containing protein 4
A.E	Pavir.Ga01575.1.p|PACid:30302815	Pavir.Ga01575.1	3.27767575	1.71267314	0.024565	30302815	Pavir.Ga01575.1	LOC_Os04g40660.1	MA3 domain containing protein, expressed	AT5G63190.1	MA3 domain-containing protein
A.E	Pavir.Ga01995.1.p|PACid:30304422	Pavir.Ga01995.1	3.11369533	1.638627787	0.008865	30304422	Pavir.Ga01995.1	LOC_Os04g30910.2	SAM domain family protein, expressed	AT3G07170.1	Sterile alpha motif (SAM) domain-containing protein
A.E	Pavir.Ga02432.1.p|PACid:30303448	Pavir.Ga02432.1	5.02660078	2.329583113	0.001816	30303448	Pavir.Ga02432.1	LOC_Os04g01674.1	erythronate-4-phosphate dehydrogenase domain containing protein, expressed	AT1G12550.1	D-isomer specific 2-hydroxyacid dehydrogenase family protein
A.E	Pavir.Ga02619.1.p|PACid:30304987	Pavir.Ga02619.1	2.69758033	1.431665924	0.011147	30304987	Pavir.Ga02619.1	LOC_Os04g13210.1	multidrug resistance-associated protein, putative, expressed	AT3G62700.1	multidrug resistance-associated protein 10
A.E	Pavir.Gb00009.1.p|PACid:30224593	Pavir.Gb00009.1	0.3664524	-1.448302279	0.001085
A.E	Pavir.Gb00010.1.p|PACid:30222145	Pavir.Gb00010.1	2.71176282	1.439231001	0.004585	30222145	Pavir.Gb00010.1	LOC_Os01g42900.1	ABC-2 type transporter domain containing protein, expressed	AT2G13610.1	ABC-2 type transporter family protein
A.E	Pavir.Gb00029.1.p|PACid:30224559	Pavir.Gb00029.1	2.69290046	1.429160902	0.006623	30224559	Pavir.Gb00029.1	LOC_Os04g57440.1	oryzain beta chain precursor, putative, expressed	AT5G43060.1	Granulin repeat cysteine protease family protein
A.E	Pavir.Gb00174.1.p|PACid:30222616	Pavir.Gb00174.1	3.35673514	1.747058708	0.000739
A.E	Pavir.Gb00270.1.p|PACid:30224335	Pavir.Gb00270.1	2.88176182	1.5269511	0.000284
A.E	Pavir.Gb00423.1.p|PACid:30222292	Pavir.Gb00423.1	3.2471737	1.699184559	0.02024	30222292	Pavir.Gb00423.1	LOC_Os04g37904.1	protein phosphatase 2C, putative, expressed	AT1G34750.1	Protein phosphatase 2C family protein
A.E	Pavir.Gb00550.1.p|PACid:30223842	Pavir.Gb00550.1	2.93432998	1.553031117	0.000191	30223842	Pavir.Gb00550.1	LOC_Os04g51900.1	expressed protein	AT5G05680.1	nuclear pore complex protein-related
A.E	Pavir.Gb00552.1.p|PACid:30221379	Pavir.Gb00552.1	2.69622026	1.430938358	0.001124	30221379	Pavir.Gb00552.1	LOC_Os04g51880.1	GHMP kinases ATP-binding protein, putative, expressed	AT3G10700.1	galacturonic acid kinase
A.E	Pavir.Gb01084.1.p|PACid:30221505	Pavir.Gb01084.1	0.38191714	-1.388668408	0.019935	30221505	Pavir.Gb01084.1	LOC_Os02g44630.1	aquaporin protein, putative, expressed	AT4G23400.1	plasma membrane intrinsic protein 1;5
A.E	Pavir.Gb01091.1.p|PACid:30222492	Pavir.Gb01091.1	5.17861476	2.372566241	0.012573	30222492	Pavir.Gb01091.1	LOC_Os11g19130.1	expressed protein	AT4G37860.1	SPT2 chromatin protein
A.E	Pavir.Gb01185.1.p|PACid:30222231	Pavir.Gb01185.1	6.05804089	2.598851316	0.001847	30222231	Pavir.Gb01185.1	LOC_Os04g45670.1	src homology-3 domain protein 3, putative, expressed	AT4G34660.1	SH3 domain-containing protein
A.E	Pavir.Gb01543.1.p|PACid:30223051	Pavir.Gb01543.1	0.26878883	-1.895454892	0.021611	30223051	Pavir.Gb01543.1	LOC_Os04g38450.1	gamma-glutamyltranspeptidase 1 precursor, putative, expressed	AT4G39640.1	gamma-glutamyl transpeptidase 1
A.E	Pavir.Gb01940.1.p|PACid:30222718	Pavir.Gb01940.1	8.26724011	3.047405788	0.002011	30222718	Pavir.Gb01940.1	LOC_Os01g47770.1	CS domain containing protein, putative, expressed	AT5G58740.1	HSP20-like chaperones superfamily protein
A.E	Pavir.Gb02168.1.p|PACid:30222783	Pavir.Gb02168.1	4.06940971	2.024819539	0.003072	30222783	Pavir.Gb02168.1	LOC_Os11g01420.1	ribosomal protein L10, putative, expressed	AT1G25260.1	Ribosomal protein L10 family protein
A.E	Pavir.Gb02375.1.p|PACid:30224501	Pavir.Gb02375.1	0.32242946	-1.632944527	0.032364	30224501	Pavir.Gb02375.1	LOC_Os10g18890.1	HNH endonuclease domain-containing protein, putative, expressed	AT1G18680.1	HNH endonuclease domain-containing protein
A.E	Pavir.Ha00272.1.p|PACid:30317423	Pavir.Ha00272.1	13.1029154	3.71181594	0.000563	30317423	Pavir.Ha00272.1	LOC_Os11g43950.1	dnaJ domain containing protein, expressed	AT4G12770.1	Chaperone DnaJ-domain superfamily protein
A.E	Pavir.Ha00414.1.p|PACid:30317975	Pavir.Ha00414.1	2.51883849	1.332758616	0.045091	30317975	Pavir.Ha00414.1	LOC_Os11g37900.1	3-ketoacyl-CoA synthase, putative, expressed	AT5G43760.1	3-ketoacyl-CoA synthase 20
A.E	Pavir.Ha00431.1.p|PACid:30317145	Pavir.Ha00431.1	3.44606945	1.784951775	0.000623	30317145	Pavir.Ha00431.1	LOC_Os11g38260.1	PAP fibrillin family domain containing protein, expressed	AT3G23400.1	Plastid-lipid associated protein PAP / fibrillin family protein
A.E	Pavir.Ha00716.1.p|PACid:30316745	Pavir.Ha00716.1	0.29402245	-1.766001784	0.023456	30316745	Pavir.Ha00716.1	LOC_Os11g16410.1	oxidoreductase, short chain dehydrogenase/reductase family, putative, expressed	AT3G03330.1	NAD(P)-binding Rossmann-fold superfamily protein
A.E	Pavir.Ha00899.1.p|PACid:30316595	Pavir.Ha00899.1	7.32489883	2.872808834	0.002071	30316595	Pavir.Ha00899.1	LOC_Os11g08300.1	aldehyde dehydrogenase, putative, expressed	AT1G44170.1	aldehyde dehydrogenase 3H1
A.E	Pavir.Ha00910.1.p|PACid:30317703	Pavir.Ha00910.1	0.30254258	-1.724789873	0.021666	30317703	Pavir.Ha00910.1	LOC_Os08g32170.1	oxidoreductase, 2OG-FeII oxygenase domain containing protein, putative, expressed	AT1G52820.1	2-oxoglutarate (2OG) and Fe(II)-dependent oxygenase superfamily protein
A.E	Pavir.Hb00172.1.p|PACid:30265406	Pavir.Hb00172.1	4.4832568	2.164547138	9.09e-05	30265406	Pavir.Hb00172.1	LOC_Os11g43750.1	polygalacturonase, putative, expressed	AT3G16850.1	Pectin lyase-like superfamily protein
A.E	Pavir.Hb00674.1.p|PACid:30266110	Pavir.Hb00674.1	0.35338731	-1.500677846	0.006797	30266110	Pavir.Hb00674.1	LOC_Os11g33090.1	amidase, putative, expressed	AT5G07360.1	Amidase family protein
A.E	Pavir.Hb01541.1.p|PACid:30265915	Pavir.Hb01541.1	0.37260851	-1.424267474	0.009809	30265915	Pavir.Hb01541.1	LOC_Os11g03290.1	nucleoside-triphosphatase, putative, expressed	AT5G18280.2	apyrase 2
A.E	Pavir.Hb02068.1.p|PACid:30265302	Pavir.Hb02068.1	0.39785917	-1.329670246	0.003605	30265302	Pavir.Hb02068.1	LOC_Os11g04220.1	HEAT repeat family protein, putative, expressed	AT2G26780.1	ARM repeat superfamily protein
A.E	Pavir.Ia00442.1.p|PACid:30214623	Pavir.Ia00442.1	38.279094	5.258484778	0.001145	30214623	Pavir.Ia00442.1	LOC_Os11g14220.1	tubulin/FtsZ domain containing protein, putative, expressed	AT4G14960.2	Tubulin/FtsZ family protein
A.E	Pavir.Ia00495.1.p|PACid:30214027	Pavir.Ia00495.1	4.06339977	2.022687308	0.00046	30214027	Pavir.Ia00495.1	LOC_Os03g57070.1	amine oxidase-related, putative, expressed	AT1G56000.1	FAD/NAD(P)-binding oxidoreductase family protein
A.E	Pavir.Ia00522.1.p|PACid:30211460	Pavir.Ia00522.1	0.37721451	-1.406542936	0.016801	30211460	Pavir.Ia00522.1	LOC_Os03g54770.1	WD domain, G-beta repeat domain containing protein, expressed	AT5G60940.1	Transducin/WD40 repeat-like superfamily protein
A.E	Pavir.Ia00651.1.p|PACid:30212669	Pavir.Ia00651.1	2.81696548	1.494141886	8.87e-05	30212669	Pavir.Ia00651.1	LOC_Os03g52630.1	endoglucanase, putative, expressed	AT5G49720.1	glycosyl hydrolase 9A1
A.E	Pavir.Ia00822.1.p|PACid:30213801	Pavir.Ia00822.1	3.97685789	1.99162901	7.99e-05	30213801	Pavir.Ia00822.1	LOC_Os03g49520.1	pinin/SDK/memA protein, putative, expressed	AT1G15200.1	protein-protein interaction regulator family protein
A.E	Pavir.Ia00862.1.p|PACid:30213695	Pavir.Ia00862.1	3.07314892	1.619717681	0.008156	30213695	Pavir.Ia00862.1	LOC_Os03g50450.1	inactive receptor kinase At2g26730 precursor, putative, expressed	AT3G17840.1	receptor-like kinase 902
A.E	Pavir.Ia00867.1.p|PACid:30213995	Pavir.Ia00867.1	0.33881165	-1.561444612	0.00859	30213995	Pavir.Ia00867.1	LOC_Os03g50520.1	dynamin family protein, putative, expressed	AT1G14830.1	DYNAMIN-like 1C
A.E	Pavir.Ia00971.1.p|PACid:30212453	Pavir.Ia00971.1	0.39440337	-1.342256221	0.009016	30212453	Pavir.Ia00971.1	LOC_Os03g47800.1	RNA recognition motif containing protein, expressed	AT5G04280.1	RNA-binding (RRM/RBD/RNP motifs) family protein with retrovirus zinc finger-like domain
A.E	Pavir.Ia02169.1.p|PACid:30215920	Pavir.Ia02169.1	0.39855356	-1.327154474	0.00101	30215920	Pavir.Ia02169.1	LOC_Os10g40570.1	flavin-containing monooxygenase family protein, putative, expressed	AT1G63370.1	Flavin-binding monooxygenase family protein
A.E	Pavir.Ia02433.1.p|PACid:30214485	Pavir.Ia02433.1	0.32199373	-1.634895496	0.001126
A.E	Pavir.Ia03158.1.p|PACid:30213052	Pavir.Ia03158.1	3.74231409	1.903930648	0.002832					AT2G42520.1	P-loop containing nucleoside triphosphate hydrolases superfamily protein
A.E	Pavir.Ia03279.1.p|PACid:30210270	Pavir.Ia03279.1	0.19765778	-2.338923341	0.008488
A.E	Pavir.Ia03418.1.p|PACid:30210801	Pavir.Ia03418.1	0.39321501	-1.346609691	0.022731	30210801	Pavir.Ia03418.1	LOC_Os03g21950.1	fumarate hydratase, mitochondrial precursor, putative, expressed	AT2G47510.1	fumarase 1
A.E	Pavir.Ia03609.1.p|PACid:30209854	Pavir.Ia03609.1	2.62305212	1.391246471	0.031007	30209854	Pavir.Ia03609.1	LOC_Os03g17900.1	hydrolase, alpha/beta fold family protein, putative, expressed	AT3G09690.1	alpha/beta-Hydrolases superfamily protein
A.E	Pavir.Ia03892.1.p|PACid:30210599	Pavir.Ia03892.1	0.38746208	-1.367872978	0.015541	30210599	Pavir.Ia03892.1	LOC_Os03g14980.1	lissencephaly type-1-like homology motif, putative, expressed	AT1G80490.2	TOPLESS-related 1
A.E	Pavir.Ia04219.1.p|PACid:30213374	Pavir.Ia04219.1	3.56656788	1.834536432	0.002611	30213374	Pavir.Ia04219.1	LOC_Os03g05520.1	nicotiana lesion-inducing like, putative, expressed	AT4G14420.1	HR-like lesion-inducing protein-related
A.E	Pavir.Ia04629.1.p|PACid:30209089	Pavir.Ia04629.1	3.2382834	1.695229251	0.012132	30209089	Pavir.Ia04629.1	LOC_Os03g10510.2	outer mitochondrial membrane porin, putative, expressed	AT5G67500.2	voltage dependent anion channel 2
A.E	Pavir.Ib00049.1.p|PACid:30242852	Pavir.Ib00049.1	3.65479491	1.869790452	0.000974	30242852	Pavir.Ib00049.1	LOC_Os03g02750.1	OsSub25 - Putative Subtilisin homologue, expressed	AT1G04110.1	Subtilase family protein
A.E	Pavir.Ib00076.1.p|PACid:30241051	Pavir.Ib00076.1	0.26213398	-1.93162372	0.000153	30241051	Pavir.Ib00076.1	LOC_Os03g03290.1	receptor-like protein kinase At3g46290 precursor, putative, expressed	AT4G00300.2	fringe-related protein
A.E	Pavir.Ib00381.1.p|PACid:30236906	Pavir.Ib00381.1	2.6512512	1.406673369	0.008172	30236906	Pavir.Ib00381.1	LOC_Os03g06520.1	sulfate transporter, putative, expressed	AT3G51895.1	sulfate transporter 3;1
A.E	Pavir.Ib00400.1.p|PACid:30241547	Pavir.Ib00400.1	3.98140921	1.993279159	0.004243	30241547	Pavir.Ib00400.1	LOC_Os03g06740.1	glutathione reductase, putative, expressed	AT3G54660.1	glutathione reductase
A.E	Pavir.Ib00669.1.p|PACid:30242748	Pavir.Ib00669.1	0.31173507	-1.681607636	0.018662	30242748	Pavir.Ib00669.1	LOC_Os03g10370.1	ADP-ribosylation factor, putative, expressed	AT3G49870.1	ADP-ribosylation factor-like A1C
A.E	Pavir.Ib00768.1.p|PACid:30240625	Pavir.Ib00768.1	0.36205907	-1.465703019	0.001673	30240625	Pavir.Ib00768.1	LOC_Os03g11720.1	glycosyl hydrolase, family 31, putative, expressed	AT5G63840.1	Glycosyl hydrolases family 31 protein
A.E	Pavir.Ib00921.1.p|PACid:30237383	Pavir.Ib00921.1	0.209756	-2.253215984	0.006621	30237383	Pavir.Ib00921.1	LOC_Os03g12350.1	two-component response regulator, putative, expressed	AT4G16110.1	response regulator 2
A.E	Pavir.Ib01101.1.p|PACid:30238414	Pavir.Ib01101.1	0.38289017	-1.384997477	0.02934	30238414	Pavir.Ib01101.1	LOC_Os03g15480.1	heat shock protein DnaJ, putative, expressed	AT5G22080.1	Chaperone DnaJ-domain superfamily protein
A.E	Pavir.Ib01576.1.p|PACid:30241252	Pavir.Ib01576.1	3.61670028	1.854674046	0.00126	30241252	Pavir.Ib01576.1	LOC_Os03g21810.1	insulin-degrading enzyme, putative, expressed	AT1G06900.1	Insulinase (Peptidase family M16) family protein
A.E	Pavir.Ib01592.1.p|PACid:30239329	Pavir.Ib01592.1	0.37957979	-1.397524904	0.000218	30239329	Pavir.Ib01592.1	LOC_Os03g21960.1	aminotransferase, putative, expressed	AT3G08860.1	PYRIMIDINE 4
A.E	Pavir.Ib01615.1.p|PACid:30237833	Pavir.Ib01615.1	2.55384326	1.352669986	0.004328	30237833	Pavir.Ib01615.1	LOC_Os03g22430.1	OsClp5 - Putative Clp protease homologue, expressed	AT1G09130.3	ATP-dependent caseinolytic (Clp) protease/crotonase family protein
A.E	Pavir.Ib01667.1.p|PACid:30241775	Pavir.Ib01667.1	0.39990004	-1.322288666	0.000335	30241775	Pavir.Ib01667.1	LOC_Os03g22740.1	nucleolar protein NOP5-1, putative, expressed	AT3G05060.1	NOP56-like pre RNA processing ribonucleoprotein
A.E	Pavir.Ib01725.1.p|PACid:30241276	Pavir.Ib01725.1	4.32961096	2.114237395	0.018548	30241276	Pavir.Ib01725.1	LOC_Os03g24600.1	peptide methionine sulfoxide reductase msrB, putative, expressed	AT4G21860.1	methionine sulfoxide reductase B 2
A.E	Pavir.Ib01816.1.p|PACid:30236918	Pavir.Ib01816.1	0.37877693	-1.400579634	0.000141	30236918	Pavir.Ib01816.1	LOC_Os03g05980.1	40S ribosomal protein S9-2, putative, expressed	AT5G39850.1	Ribosomal protein S4
A.E	Pavir.Ib01852.1.p|PACid:30239506	Pavir.Ib01852.1	2.87929384	1.525715026	0.0007	30239506	Pavir.Ib01852.1	LOC_Os03g27230.1	phospho-2-dehydro-3-deoxyheptonate aldolase, chloroplast precursor, putative, expressed	AT1G22410.1	Class-II DAHP synthetase family protein
A.E	Pavir.Ib01891.1.p|PACid:30242335	Pavir.Ib01891.1	2.80919379	1.490156153	9.68e-05	30242335	Pavir.Ib01891.1	LOC_Os03g28420.1	3-oxoacyl-synthase, putative, expressed	AT1G74960.1	fatty acid biosynthesis 1
A.E	Pavir.Ib02029.1.p|PACid:30237588	Pavir.Ib02029.1	2.53019246	1.339247128	0.006719	30237588	Pavir.Ib02029.1	LOC_Os03g32470.1	leucoanthocyanidin dioxygenase, putative, expressed	AT1G17020.1	senescence-related gene 1
A.E	Pavir.Ib02061.1.p|PACid:30238822	Pavir.Ib02061.1	0.34801757	-1.52276794	0.024649	30238822	Pavir.Ib02061.1	LOC_Os03g30790.1	erlin-2 precursor, putative, expressed	AT2G03510.1	SPFH/Band 7/PHB domain-containing membrane-associated protein family
A.E	Pavir.Ib02226.1.p|PACid:30238342	Pavir.Ib02226.1	3.90492092	1.965293331	0.009927	30238342	Pavir.Ib02226.1	LOC_Os10g40780.1	CCR4-Not complex component, Not1domain containing protein, expressed	AT1G02080.2	transcription regulators
A.E	Pavir.Ib02297.1.p|PACid:30239798	Pavir.Ib02297.1	0.39460823	-1.341507052	0.000222	30239798	Pavir.Ib02297.1	LOC_Os10g42299.3	mitochondrial carrier protein, putative, expressed	AT5G46800.1	Mitochondrial substrate carrier family protein
A.E	Pavir.Ib02399.1.p|PACid:30238984	Pavir.Ib02399.1	4.68458627	2.22792164	0.001403	30238984	Pavir.Ib02399.1	LOC_Os05g48450.1	aminotransferase domain containing protein, putative, expressed	AT5G65780.1	branched-chain amino acid aminotransferase 5 / branched-chain amino acid transaminase 5 (BCAT5)
A.E	Pavir.Ib02641.1.p|PACid:30238747	Pavir.Ib02641.1	0.23509683	-2.088672982	0.00097	30238747	Pavir.Ib02641.1	LOC_Os10g07229.1	dehydrogenase, putative, expressed	AT1G32780.1	GroES-like zinc-binding dehydrogenase family protein
A.E	Pavir.Ib02998.1.p|PACid:30240594	Pavir.Ib02998.1	2.81144439	1.491311512	0.006216	30240594	Pavir.Ib02998.1	LOC_Os08g41710.1	FHA domain containing protein, putative, expressed	AT3G07220.1	SMAD/FHA domain-containing protein
A.E	Pavir.Ib03031.1.p|PACid:30238502	Pavir.Ib03031.1	0.35225675	-1.505300744	0.002675	30238502	Pavir.Ib03031.1	LOC_Os01g05840.1	oxidoreductase, short chain dehydrogenase/reductase family domain containing family, expressed	AT2G37540.1	NAD(P)-binding Rossmann-fold superfamily protein
A.E	Pavir.Ib03358.1.p|PACid:30239372	Pavir.Ib03358.1	3.2843121	1.715591227	0.000127
A.E	Pavir.Ib03380.1.p|PACid:30242838	Pavir.Ib03380.1	3.07790675	1.621949525	0.000139	30242838	Pavir.Ib03380.1	LOC_Os10g29620.1	tyrosine protein kinase domain containing protein, putative, expressed	AT5G56460.1	Protein kinase superfamily protein
A.E	Pavir.Ib03522.1.p|PACid:30242591	Pavir.Ib03522.1	0.3895371	-1.360167367	0.020834	30242591	Pavir.Ib03522.1	LOC_Os10g35010.1	ATTIC110/TIC110, putative, expressed	AT1G06950.1	translocon at the inner envelope membrane of chloroplasts 110
A.E	Pavir.Ib03760.1.p|PACid:30236873	Pavir.Ib03760.1	3.10750914	1.635758633	0.009831	30236873	Pavir.Ib03760.1	LOC_Os10g37420.2	cytochrome b5-like Heme/Steroid binding domain containing protein, expressed	AT5G53560.1	cytochrome B5 isoform E
A.E	Pavir.J00116.1.p|PACid:30302100	Pavir.J00116.1	0.3983516	-1.327885717	0.000118	30302100	Pavir.J00116.1	LOC_Os03g60150.1	protein kinase domain containing protein, expressed	AT5G01850.1	Protein kinase superfamily protein
A.E	Pavir.J00132.1.p|PACid:30254394	Pavir.J00132.1	2.63643051	1.398585971	0.000333	30254394	Pavir.J00132.1	LOC_Os05g51480.1	cleavage and polyadenylation specificity factor, putative, expressed	AT4G05420.1	damaged DNA binding protein 1A
A.E	Pavir.J00135.2.p|PACid:30254393	Pavir.J00135.2	0.31091329	-1.685415832	0.00836	30254393	Pavir.J00135.2	LOC_Os05g51450.1	OsClp8 - Putative Clp protease homologue, expressed	AT1G49970.1	CLP protease proteolytic subunit 1
A.E	Pavir.J00145.1.p|PACid:30185151	Pavir.J00145.1	2.72340829	1.445413284	0.002759	30185151	Pavir.J00145.1	LOC_Os05g40990.1	NADH-cytochrome b5 reductase, putative, expressed	AT5G17770.1	NADH:cytochrome B5 reductase 1
A.E	Pavir.J00157.1.p|PACid:30259127	Pavir.J00157.1	3.51197925	1.812284321	0.000182	30259127	Pavir.J00157.1	LOC_Os05g03910.1	RNA polymerase II-associated protein 3, putative, expressed	AT1G56440.1	Tetratricopeptide repeat (TPR)-like superfamily protein
A.E	Pavir.J00210.1.p|PACid:30282245	Pavir.J00210.1	0.28281709	-1.822058807	0.026055	30282245	Pavir.J00210.1	LOC_Os08g36774.1	zinc finger family protein, putative, expressed	AT5G22480.1	ZPR1 zinc-finger domain protein
A.E	Pavir.J00225.1.p|PACid:30197097	Pavir.J00225.1	3.04864129	1.608166411	0.000659	30197097	Pavir.J00225.1	LOC_Os05g49200.1	aspartic proteinase oryzasin-1 precursor, putative, expressed	AT1G11910.1	aspartic proteinase A1
A.E	Pavir.J00318.1.p|PACid:30231801	Pavir.J00318.1	0.37727957	-1.406294127	0.034879	30231801	Pavir.J00318.1	LOC_Os05g40820.2	ribosomal protein L24, putative, expressed	AT2G36620.1	ribosomal protein L24
A.E	Pavir.J00528.1.p|PACid:30273512	Pavir.J00528.1	0.37392512	-1.419178709	0.000286	30273512	Pavir.J00528.1	LOC_Os11g38170.1	notchless protein, putative, expressed	AT5G52820.1	WD-40 repeat family protein / notchless protein, putative
A.E	Pavir.J00715.1.p|PACid:30220957	Pavir.J00715.1	3.76844035	1.913967557	0.002824	30220957	Pavir.J00715.1	LOC_Os03g23950.1	adapitin protein, putative, expressed	AT4G11380.2	Adaptin family protein
A.E	Pavir.J01075.1.p|PACid:30257299	Pavir.J01075.1	2.60680536	1.382282865	0.017448
A.E	Pavir.J01083.1.p|PACid:30286846	Pavir.J01083.1	3.59364335	1.845447234	0.000221	30286846	Pavir.J01083.1	LOC_Os05g04380.1	peroxidase precursor, putative, expressed	AT4G33420.1	Peroxidase superfamily protein
A.E	Pavir.J01524.1.p|PACid:30217813	Pavir.J01524.1	2.80966621	1.490398747	0.021589	30217813	Pavir.J01524.1	LOC_Os05g18770.1	Sad1 / UNC-like C-terminal domain containing protein, putative, expressed	AT3G10730.1	SAD1/UNC-84 domain protein 2
A.E	Pavir.J01608.1.p|PACid:30190153	Pavir.J01608.1	3.10412287	1.634185663	0.019896	30190153	Pavir.J01608.1	LOC_Os09g26180.1	transcription initiation factor TFIID subunit 10, putative, expressed	AT4G31720.1	TBP-associated factor II 15
A.E	Pavir.J01637.1.p|PACid:30315473	Pavir.J01637.1	3.08172137	1.623736429	0.001772	30315473	Pavir.J01637.1	LOC_Os05g11060.1	galactosyltransferase family protein, putative, expressed	AT2G26100.1	Galactosyltransferase family protein
A.E	Pavir.J02047.1.p|PACid:30272853	Pavir.J02047.1	3.29305271	1.719425605	2.33e-05	30272853	Pavir.J02047.1	LOC_Os03g59060.1	OsPP2Ac-2 - Phosphatase 2A isoform 2 belonging to family 2, expressed	AT3G58500.1	protein phosphatase 2A-4
A.E	Pavir.J02268.1.p|PACid:30207531	Pavir.J02268.1	2.79245756	1.481535355	0.049757	30207531	Pavir.J02268.1	LOC_Os05g38950.1	TBC domain containing protein, expressed	AT3G55020.1	Ypt/Rab-GAP domain of gyp1p superfamily protein
A.E	Pavir.J02390.1.p|PACid:30246794	Pavir.J02390.1	4.1334939	2.047361756	0.001808	30246794	Pavir.J02390.1	LOC_Os08g03290.1	glyceraldehyde-3-phosphate dehydrogenase, putative, expressed	AT3G04120.1	glyceraldehyde-3-phosphate dehydrogenase C subunit 1
A.E	Pavir.J02507.1.p|PACid:30248656	Pavir.J02507.1	9.16891234	3.196750604	0.000525	30248656	Pavir.J02507.1	LOC_Os01g08560.1	DnaK family protein, putative, expressed	AT1G79920.1	Heat shock protein 70 (Hsp 70) family protein
A.E	Pavir.J02798.1.p|PACid:30287737	Pavir.J02798.1	6.9734854	2.801879907	0.002394	30287737	Pavir.J02798.1	LOC_Os05g33390.1	cation-transporting ATPase, putative, expressed	AT5G23630.1	phosphate deficiency response 2
A.E	Pavir.J02929.1.p|PACid:30200299	Pavir.J02929.1	2.5129356	1.3293737	0.000351
A.E	Pavir.J03416.1.p|PACid:30243476	Pavir.J03416.1	6.35080838	2.666940241	0.0134	30243476	Pavir.J03416.1	LOC_Os02g51610.1	CRAL/TRIO domain containing protein, expressed	AT1G22180.2	Sec14p-like phosphatidylinositol transfer family protein
A.E	Pavir.J03648.1.p|PACid:30255467	Pavir.J03648.1	0.38289998	-1.384960504	0.012391	30255467	Pavir.J03648.1	LOC_Os02g57180.1	NADH dehydrogenase 1 alpha subcomplex subunit 9,mitochondrial precursor, putative, expressed	AT2G20360.1	NAD(P)-binding Rossmann-fold superfamily protein
A.E	Pavir.J03697.1.p|PACid:30201022	Pavir.J03697.1	3.20004598	1.678092635	0.000676	30201022	Pavir.J03697.1	LOC_Os03g60380.1	cinnamoyl CoA reductase, putative, expressed	AT5G58490.1	NAD(P)-binding Rossmann-fold superfamily protein
A.E	Pavir.J03797.1.p|PACid:30202291	Pavir.J03797.1	3.48320632	1.800415931	0.004309	30202291	Pavir.J03797.1	LOC_Os06g07090.1	AP-1 complex subunit gamma-1, putative, expressed	AT1G60070.1	Adaptor protein complex AP-1, gamma subunit
A.E	Pavir.J04126.1.p|PACid:30273216	Pavir.J04126.1	6.40506955	2.679214237	0.001677	30273216	Pavir.J04126.1	LOC_Os07g41750.1	40S ribosomal protein S3-1, putative, expressed	AT5G35530.1	Ribosomal protein S3 family protein
A.E	Pavir.J04630.1.p|PACid:30295020	Pavir.J04630.1	4.22587799	2.079251114	0.016009	30295020	Pavir.J04630.1	LOC_Os05g08770.1	uncharacterized protein At4g06744 precursor, putative, expressed	AT1G12040.1	leucine-rich repeat/extensin 1
A.E	Pavir.J04686.1.p|PACid:30272442	Pavir.J04686.1	3.03548726	1.601928116	0.023642	30272442	Pavir.J04686.1	LOC_Os01g47080.1	pyruvate kinase, putative, expressed	AT5G52920.1	plastidic pyruvate kinase beta subunit 1
A.E	Pavir.J04878.1.p|PACid:30307657	Pavir.J04878.1	3.35480484	1.746228843	0.010151	30307657	Pavir.J04878.1	LOC_Os07g30020.1	anthranilate phosphoribosyltransferase, putative, expressed	AT4G11610.1	C2 calcium/lipid-binding plant phosphoribosyltransferase family protein
A.E	Pavir.J05052.1.p|PACid:30276952	Pavir.J05052.1	2.76594255	1.467771191	0.001221	30276952	Pavir.J05052.1	LOC_Os06g33930.1	Divergent PAP2 family domain containing protein, expressed	AT3G12685.1	Acid phosphatase/vanadium-dependent haloperoxidase-related protein
A.E	Pavir.J05134.1.p|PACid:30296320	Pavir.J05134.1	8.10976841	3.019660716	0.008057	30296320	Pavir.J05134.1	LOC_Os11g07460.1	TCP family transcription factor, putative, expressed	AT1G58100.1	TCP family transcription factor
A.E	Pavir.J05224.1.p|PACid:30275873	Pavir.J05224.1	0.31000976	-1.68961444	0.000322	30275873	Pavir.J05224.1	LOC_Os06g04130.1	lung seven transmembrane domain containing protein, putative, expressed	AT5G42090.1	Lung seven transmembrane receptor family protein
A.E	Pavir.J05315.1.p|PACid:30287149	Pavir.J05315.1	6.23405046	2.640169833	0.002897	30287149	Pavir.J05315.1	LOC_Os02g52390.1	M16 domain containing zinc peptidase, putative, expressed	AT3G19170.1	presequence protease 1
A.E	Pavir.J05429.1.p|PACid:30225445	Pavir.J05429.1	0.38157317	-1.389968372	0.004222	30225445	Pavir.J05429.1	LOC_Os04g14790.1	FAD dependent oxidoreductase domain containing protein, expressed	AT3G10370.1	FAD-dependent oxidoreductase family protein
A.E	Pavir.J06227.1.p|PACid:30247214	Pavir.J06227.1	0.17651079	-2.502171744	0.005914	30247214	Pavir.J06227.1	LOC_Os04g02900.1	dehydrogenase E1 component domain containing protein, expressed	AT1G01090.1	pyruvate dehydrogenase E1 alpha
A.E	Pavir.J06248.1.p|PACid:30217879	Pavir.J06248.1	3.09106883	1.628105782	0.001089	30217879	Pavir.J06248.1	LOC_Os06g35540.1	aminotransferase, classes I and II, domain containing protein, expressed	AT2G30970.1	aspartate aminotransferase 1
A.E	Pavir.J06280.1.p|PACid:30277841	Pavir.J06280.1	3.82450252	1.935272099	0.010493	30277841	Pavir.J06280.1	LOC_Os06g45660.1	histidine triad family protein, putative, expressed	AT1G31160.1	HISTIDINE TRIAD NUCLEOTIDE-BINDING 2
A.E	Pavir.J06588.1.p|PACid:30202797	Pavir.J06588.1	0.22074472	-2.179549147	0.008281	30202797	Pavir.J06588.1	LOC_Os09g10340.1	cytochrome P450, putative, expressed	AT3G26330.1	cytochrome P450, family 71, subfamily B, polypeptide 37
A.E	Pavir.J06595.1.p|PACid:30273210	Pavir.J06595.1	3.35299326	1.745449584	0.005586	30273210	Pavir.J06595.1	LOC_Os01g42870.1	transferase family protein, putative, expressed	AT3G62160.1	HXXXD-type acyl-transferase family protein
A.E	Pavir.J07416.1.p|PACid:30208547	Pavir.J07416.1	2.59136179	1.37371045	0.002577	30208547	Pavir.J07416.1	LOC_Os03g08810.1	expressed protein	AT5G62440.1	Protein of unknown function (DUF3223)
A.E	Pavir.J07417.1.p|PACid:30218940	Pavir.J07417.1	0.31882964	-1.649142329	0.042688	30218940	Pavir.J07417.1	LOC_Os05g51560.1	CK1_CaseinKinase_1.8 - CK1 includes the casein kinase 1 kinases, expressed	AT1G72710.1	casein kinase 1-like protein 2
A.E	Pavir.J07644.1.p|PACid:30294814	Pavir.J07644.1	13.5510772	3.760335631	2.38e-06	30294814	Pavir.J07644.1	LOC_Os05g44050.1	ras-related protein, putative, expressed	AT3G18820.1	RAB GTPase homolog G3F
A.E	Pavir.J08202.1.p|PACid:30208198	Pavir.J08202.1	2.7619423	1.46568318	0.014937	30208198	Pavir.J08202.1	LOC_Os04g39430.1	cytochrome P450, putative, expressed	AT3G50660.1	Cytochrome P450 superfamily protein
A.E	Pavir.J08334.1.p|PACid:30273228	Pavir.J08334.1	0.23457372	-2.091886682	0.001183	30273228	Pavir.J08334.1	LOC_Os03g45720.1	glyoxalase family protein, putative, expressed	AT2G32090.1	Lactoylglutathione lyase / glyoxalase I family protein
A.E	Pavir.J08344.1.p|PACid:30190603	Pavir.J08344.1	3.39098478	1.761704309	0.007738	30190603	Pavir.J08344.1	LOC_Os01g51300.1	WD domain, G-beta repeat domain containing protein, expressed	AT2G19520.1	Transducin family protein / WD-40 repeat family protein
A.E	Pavir.J08575.1.p|PACid:30246000	Pavir.J08575.1	2.94922681	1.560336778	0.006103	30246000	Pavir.J08575.1	LOC_Os04g13470.1	expressed protein	AT4G19490.1	VPS54
A.E	Pavir.J10047.1.p|PACid:30284949	Pavir.J10047.1	3.05185439	1.60968613	0.009694
A.E	Pavir.J10341.1.p|PACid:30191141	Pavir.J10341.1	3.30894222	1.726370098	0.000226	30191141	Pavir.J10341.1	LOC_Os05g04510.1	S-adenosylmethionine synthetase, putative, expressed	AT3G17390.1	S-adenosylmethionine synthetase family protein
A.E	Pavir.J10652.1.p|PACid:30257927	Pavir.J10652.1	7.13613303	2.835142509	0.003989	30257927	Pavir.J10652.1	LOC_Os03g43684.1	KIP1, putative, expressed	AT1G03080.1	kinase interacting (KIP1-like) family protein
A.E	Pavir.J11287.1.p|PACid:30248488	Pavir.J11287.1	0.39625123	-1.33551268	0.013133
A.E	Pavir.J12618.1.p|PACid:30315655	Pavir.J12618.1	0.34864792	-1.520157237	6.32e-05	30315655	Pavir.J12618.1	LOC_Os04g39880.1	Os4bglu12 - beta-glucosidase, exo-beta-glucanase, expressed	AT2G44480.1	beta glucosidase 17
A.E	Pavir.J12637.1.p|PACid:30295130	Pavir.J12637.1	0.38830167	-1.364750195	0.003405	30295130	Pavir.J12637.1	LOC_Os08g41110.1	chaperone protein dnaJ 10, putative, expressed	AT1G21080.1	DNAJ heat shock N-terminal domain-containing protein
A.E	Pavir.J13666.1.p|PACid:30195084	Pavir.J13666.1	2.95899027	1.565104951	8.08e-05	30195084	Pavir.J13666.1	LOC_Os02g57760.1	O-methyltransferase, putative, expressed	AT3G53140.1	O-methyltransferase family protein
A.E	Pavir.J14423.1.p|PACid:30277425	Pavir.J14423.1	3.65780208	1.870977016	0.00505	30277425	Pavir.J14423.1	LOC_Os04g47120.1	acyl-CoA thioesterase 2, putative, expressed	AT1G01710.1	Acyl-CoA thioesterase family protein
A.E	Pavir.J14847.1.p|PACid:30283139	Pavir.J14847.1	0.38754108	-1.36757886	0.012643	30283139	Pavir.J14847.1	LOC_Os01g40860.1	aldehyde dehydrogenase, putative, expressed	AT3G24503.1	aldehyde dehydrogenase 2C4
A.E	Pavir.J14971.1.p|PACid:30315025	Pavir.J14971.1	2.51735643	1.331909502	0.03038	30315025	Pavir.J14971.1	LOC_Os03g46490.1	40S ribosomal protein S21, putative, expressed	AT5G27700.1	Ribosomal protein S21e
A.E	Pavir.J15400.1.p|PACid:30285398	Pavir.J15400.1	2.53608762	1.342604588	0.00798
A.E	Pavir.J16179.1.p|PACid:30225111	Pavir.J16179.1	3.21168466	1.68333025	0.000825
A.E	Pavir.J17001.1.p|PACid:30245857	Pavir.J17001.1	0.28610409	-1.80538796	0.003255	30245857	Pavir.J17001.1	LOC_Os04g57400.1	methylthioribose kinase, putative, expressed	AT1G49820.1	S-methyl-5-thioribose kinase
A.E	Pavir.J18203.1.p|PACid:30274964	Pavir.J18203.1	5.72077717	2.51621115	0.000113	30274964	Pavir.J18203.1	LOC_Os05g07090.1	acyl-coenzyme A dehydrogenase, mitochondrial precursor, putative, expressed	AT3G51840.1	acyl-CoA oxidase 4
A.E	Pavir.J20347.1.p|PACid:30284838	Pavir.J20347.1	0.25108685	-1.993741636	6.08e-05	30284838	Pavir.J20347.1	LOC_Os11g07440.1	plant neutral invertase domain containing protein, expressed	AT1G22650.1	Plant neutral invertase family protein
A.E	Pavir.J20958.1.p|PACid:30247691	Pavir.J20958.1	7.23475668	2.854944497	0.006881	30247691	Pavir.J20958.1	LOC_Os03g04110.1	lysM domain-containing GPI-anchored protein precursor, putative, expressed	AT2G17120.1	lysm domain GPI-anchored protein 2 precursor
A.E	Pavir.J20971.1.p|PACid:30294728	Pavir.J20971.1	2.75714066	1.463172871	0.039848	30294728	Pavir.J20971.1	LOC_Os04g52710.1	imidazoleglycerol-phosphate dehydratase, putative, expressed	AT3G22425.2	imidazoleglycerol-phosphate dehydratase
A.E	Pavir.J20997.1.p|PACid:30271039	Pavir.J20997.1	0.20895538	-2.258733185	0.003392	30271039	Pavir.J20997.1	LOC_Os10g36470.2	peptidase, M24 family protein, putative, expressed	AT2G45240.1	methionine aminopeptidase 1A
A.E	Pavir.J21269.1.p|PACid:30207616	Pavir.J21269.1	4.27271623	2.095153505	0.002473	30207616	Pavir.J21269.1	LOC_Os09g31180.1	ribosomal protein L6, putative, expressed	AT1G33140.1	Ribosomal protein L6 family
A.E	Pavir.J21323.1.p|PACid:30236753	Pavir.J21323.1	0.33898669	-1.560699473	0.005269	30236753	Pavir.J21323.1	LOC_Os01g67220.1	Os1bglu4 - beta-glucosidase-like protein without signal sequence, expressed	AT5G36890.1	beta glucosidase 42
A.E	Pavir.J22774.1.p|PACid:30208065	Pavir.J22774.1	3.29037044	1.718250018	0.018351	30208065	Pavir.J22774.1	LOC_Os04g52850.1	OTU-like cysteine protease family protein, putative, expressed	AT3G62940.2	Cysteine proteinases superfamily protein
A.E	Pavir.J22922.1.p|PACid:30197461	Pavir.J22922.1	0.3812699	-1.391115466	0.000132	30197461	Pavir.J22922.1	LOC_Os09g39380.1	monodehydroascorbate reductase, putative, expressed	AT3G52880.1	monodehydroascorbate reductase 1
A.E	Pavir.J24549.1.p|PACid:30272628	Pavir.J24549.1	6.74342887	2.753482354	0.000287	30272628	Pavir.J24549.1	LOC_Os08g32170.1	oxidoreductase, 2OG-FeII oxygenase domain containing protein, putative, expressed	AT1G52820.1	2-oxoglutarate (2OG) and Fe(II)-dependent oxygenase superfamily protein
A.E	Pavir.J24796.1.p|PACid:30259611	Pavir.J24796.1	9.67862111	3.274801525	0.005508	30259611	Pavir.J24796.1	LOC_Os08g44750.1	auxin-induced protein 5NG4, putative, expressed	AT1G75500.1	Walls Are Thin 1
A.E	Pavir.J27354.1.p|PACid:30225046	Pavir.J27354.1	0.29323853	-1.769853414	0.002837	30225046	Pavir.J27354.1	LOC_Os11g01869.1	double-stranded RNA binding motif containing protein, expressed	AT1G09700.1	dsRNA-binding domain-like superfamily protein
A.E	Pavir.J27820.1.p|PACid:30275062	Pavir.J27820.1	2.68562729	1.425259101	0.008323	30275062	Pavir.J27820.1	LOC_Os09g35630.1	BAG domain-containing protein, putative, expressed	AT5G52060.1	BCL-2-associated athanogene 1
A.E	Pavir.J28080.1.p|PACid:30197153	Pavir.J28080.1	3.02028658	1.594685448	0.001761	30197153	Pavir.J28080.1	LOC_Os11g02440.1	chalcone--flavonone isomerase, putative, expressed	AT5G05270.1	Chalcone-flavanone isomerase family protein
A.E	Pavir.J28636.1.p|PACid:30257859	Pavir.J28636.1	0.30668171	-1.705185979	0.002998	30257859	Pavir.J28636.1	LOC_Os05g33110.1	endo-1,3;1,4-beta-D-glucanase precursor, putative, expressed	AT3G23600.1	alpha/beta-Hydrolases superfamily protein
A.E	Pavir.J30404.1.p|PACid:30225901	Pavir.J30404.1	2.51690635	1.331651537	0.007993	30225901	Pavir.J30404.1	LOC_Os03g62850.2	AMP-binding enzyme, putative, expressed	AT3G23790.1	AMP-dependent synthetase and ligase family protein
A.E	Pavir.J30535.1.p|PACid:30218051	Pavir.J30535.1	3.01910793	1.594122332	0.008331	30218051	Pavir.J30535.1	LOC_Os05g42020.1	UDP-glucoronosyl and UDP-glucosyl transferase domain containing protein, expressed	AT2G15490.3	UDP-glycosyltransferase 73B4
A.E	Pavir.J31365.1.p|PACid:30286015	Pavir.J31365.1	0.32381199	-1.62677169	0.015225
A.E	Pavir.J33035.1.p|PACid:30207716	Pavir.J33035.1	0.39913079	-1.325066529	0.00184	30207716	Pavir.J33035.1	LOC_Os08g36150.1	activator of 90 kDa heat shock protein ATPase homolog, putative, expressed	AT3G12050.1	Aha1 domain-containing protein
A.E	Pavir.J33044.1.p|PACid:30306938	Pavir.J33044.1	0.26426573	-1.919938731	0.015274	30306938	Pavir.J33044.1	LOC_Os06g35700.1	reticuline oxidase-like protein precursor, putative, expressed	AT5G44410.1	FAD-binding Berberine family protein
A.E	Pavir.J33065.1.p|PACid:30295448	Pavir.J33065.1	6.62791093	2.728554214	5.22e-05	30295448	Pavir.J33065.1	LOC_Os02g03260.1	3-isopropylmalate dehydratase large subunit 2, putative, expressed	AT4G13430.1	isopropyl malate isomerase large subunit 1
A.E	Pavir.J33091.1.p|PACid:30200154	Pavir.J33091.1	7.13554084	2.835022784	0.000777	30200154	Pavir.J33091.1	LOC_Os01g70525.1	tropinone reductase, putative, expressed	AT5G06060.1	NAD(P)-binding Rossmann-fold superfamily protein
A.E	Pavir.J33134.1.p|PACid:30217043	Pavir.J33134.1	3.35314683	1.74551566	0.015258	30217043	Pavir.J33134.1	LOC_Os07g10840.1	uncharacterized glycosyltransferase, putative, expressed	AT3G57520.1	seed imbibition 2
A.E	Pavir.J33142.1.p|PACid:30217394	Pavir.J33142.1	3.73874125	1.902552629	0.000448
A.E	Pavir.J33201.1.p|PACid:30283316	Pavir.J33201.1	4.85485281	2.279427556	0.023049	30283316	Pavir.J33201.1	LOC_Os02g01560.1	40S ribosomal protein S4, putative, expressed	AT5G58420.1	Ribosomal protein S4 (RPS4A) family protein
A.E	Pavir.J33423.1.p|PACid:30208153	Pavir.J33423.1	2.61594077	1.387329876	0.002025	30208153	Pavir.J33423.1	LOC_Os05g48810.1	dnaJ domain containing protein, expressed	AT2G20560.1	DNAJ heat shock family protein
A.E	Pavir.J34008.1.p|PACid:30216348	Pavir.J34008.1	0.28093064	-1.831714099	0.000147	30216348	Pavir.J34008.1	LOC_Os09g27830.1	OsPDIL2-3 protein disulfide isomerase PDIL2-3, expressed	AT1G04980.1	PDI-like 2-2
A.E	Pavir.J34065.1.p|PACid:30207993	Pavir.J34065.1	0.39896491	-1.325666215	0.000854	30207993	Pavir.J34065.1	LOC_Os05g42230.1	universal stress protein domain containing protein, putative, expressed	AT1G11360.1	Adenine nucleotide alpha hydrolases-like superfamily protein
A.E	Pavir.J34776.1.p|PACid:30208358	Pavir.J34776.1	0.3960727	-1.336162833	0.019944	30208358	Pavir.J34776.1	LOC_Os01g55260.1	AAA-type ATPase family protein, putative, expressed	AT2G34560.2	P-loop containing nucleoside triphosphate hydrolases superfamily protein
A.E	Pavir.J35014.1.p|PACid:30202789	Pavir.J35014.1	7.03974414	2.815522996	0.000132	30202789	Pavir.J35014.1	LOC_Os06g04620.1	GDP-mannose 4,6 dehydratase 2, putative, expressed	AT3G51160.1	NAD(P)-binding Rossmann-fold superfamily protein
A.E	Pavir.J35237.1.p|PACid:30255621	Pavir.J35237.1	0.25159545	-1.990822245	0.001392	30255621	Pavir.J35237.1	LOC_Os08g14330.1	aldose 1-epimerase, putative, expressed	AT5G57330.1	Galactose mutarotase-like superfamily protein
A.E	Pavir.J35250.1.p|PACid:30208528	Pavir.J35250.1	3.18491837	1.671256398	0.000901	30208528	Pavir.J35250.1	LOC_Os02g15230.1	GDSL-like lipase/acylhydrolase, putative, expressed	AT5G45910.1	GDSL-like Lipase/Acylhydrolase superfamily protein
A.E	Pavir.J36098.1.p|PACid:30285683	Pavir.J36098.1	3.23484773	1.693697804	0.006201	30285683	Pavir.J36098.1	LOC_Os06g06790.1	OsPDIL1-5 protein disulfide isomerase PDIL1-5, expressed	AT3G16110.1	PDI-like 1-6
A.E	Pavir.J36682.1.p|PACid:30243106	Pavir.J36682.1	5.617905	2.490032227	0.002899	30243106	Pavir.J36682.1	LOC_Os05g06500.1	universal stress protein domain containing protein, putative, expressed	AT3G17020.1	Adenine nucleotide alpha hydrolases-like superfamily protein
A.E	Pavir.J37770.1.p|PACid:30244987	Pavir.J37770.1	7.72988647	2.950447224	0.026039	30244987	Pavir.J37770.1	LOC_Os07g22600.1	spermidine synthase, putative, expressed	AT1G23820.1	spermidine synthase 1
A.E	Pavir.J39391.1.p|PACid:30246604	Pavir.J39391.1	0.39977714	-1.322732119	0.012703	30246604	Pavir.J39391.1	LOC_Os06g21480.1	60S ribosomal protein L31, putative, expressed	AT2G19740.1	Ribosomal protein L31e family protein
A.E	Pavir.J39816.1.p|PACid:30270546	Pavir.J39816.1	0.32616789	-1.616313313	0.031593	30270546	Pavir.J39816.1	LOC_Os05g05320.1	PPR repeat domain containing protein, putative, expressed	AT4G35850.1	Pentatricopeptide repeat (PPR) superfamily protein
A.E	Pavir.J39914.1.p|PACid:30218895	Pavir.J39914.1	3.30180566	1.723255206	0.008059	30218895	Pavir.J39914.1	LOC_Os01g40420.1	CBS domain containing membrane protein, putative, expressed	AT1G69800.2	Cystathionine beta-synthase (CBS) protein
A.E	Pavir.J40016.1.p|PACid:30258230	Pavir.J40016.1	6.38623428	2.67496548	0.02127	30258230	Pavir.J40016.1	LOC_Os05g38500.1	fasciclin-like arabinogalactan protein, putative, expressed	AT3G46550.1	Fasciclin-like arabinogalactan family protein
A.E	Pavir.J40042.1.p|PACid:30245410	Pavir.J40042.1	4.01315494	2.004736857	0.037033	30245410	Pavir.J40042.1	LOC_Os05g05830.1	bifunctional protein folD, putative, expressed	AT3G12290.1	Amino acid dehydrogenase family protein
A.E	Pavir.J40090.1.p|PACid:30308401	Pavir.J40090.1	0.35248323	-1.504373483	0.010415	30308401	Pavir.J40090.1	LOC_Os05g43690.1	glucan endo-1,3-beta-glucosidase-like protein 3 precursor, putative, expressed	AT1G18650.1	plasmodesmata callose-binding protein 3
A.E	Pavir.J40810.1.p|PACid:30314709	Pavir.J40810.1	4.3307364	2.114612363	0.004604	30314709	Pavir.J40810.1	LOC_Os02g48390.1	phosphoribosyl transferase, putative, expressed	AT2G42910.1	Phosphoribosyltransferase family protein
A.E	Pavir.Aa00186.1.p|PACid:30249333	Pavir.Aa00186.1	0.34419269	-1.538711645	0.00116
A.E	Pavir.Aa00552.1.p|PACid:30252815	Pavir.Aa00552.1	0.37894073	-1.39995588	0.039662	30252815	Pavir.Aa00552.1	LOC_Os02g52390.1	M16 domain containing zinc peptidase, putative, expressed	AT3G19170.1	presequence protease 1
A.E	Pavir.Aa02398.1.p|PACid:30249465	Pavir.Aa02398.1	0.14208359	-2.815188155	0.004588	30249465	Pavir.Aa02398.1	LOC_Os02g20360.1	tyrosine aminotransferase, putative, expressed	AT5G36160.1	Tyrosine transaminase family protein
A.E	Pavir.Ab00144.1.p|PACid:30232057	Pavir.Ab00144.1	2.82315887	1.497310318	0.000393	30232057	Pavir.Ab00144.1	LOC_Os02g03730.1	SWIB/MDM2 domain containing protein, expressed	AT2G14880.1	SWIB/MDM2 domain superfamily protein
A.E	Pavir.Ab01361.1.p|PACid:30235021	Pavir.Ab01361.1	2.55548737	1.353598461	0.004898	30235021	Pavir.Ab01361.1	LOC_Os02g19770.1	eukaryotic translation initiation factor 1A, putative, expressed	AT2G04520.1	Nucleic acid-binding, OB-fold-like protein
A.E	Pavir.Ab01476.1.p|PACid:30234312	Pavir.Ab01476.1	0.39277483	-1.34822563	0.000199	30234312	Pavir.Ab01476.1	LOC_Os03g14560.1	cytochrome P450, putative, expressed	AT2G45550.1	cytochrome P450, family 76, subfamily C, polypeptide 4
A.E	Pavir.Bb00247.1.p|PACid:30298381	Pavir.Bb00247.1	0.17258131	-2.534651898	0.003406	30298381	Pavir.Bb00247.1	LOC_Os07g04910.1	reticulon domain containing protein, putative, expressed	AT3G10260.3	Reticulon family protein
A.E	Pavir.Bb01893.1.p|PACid:30297522	Pavir.Bb01893.1	6.20181384	2.632690221	0.001096	30297522	Pavir.Bb01893.1	LOC_Os09g23160.1	annexin, putative, expressed	AT1G68090.1	annexin 5
A.E	Pavir.Bb02686.1.p|PACid:30297191	Pavir.Bb02686.1	3.67468183	1.87761934	0.000206	30297191	Pavir.Bb02686.1	LOC_Os08g43580.1	acyl carrier protein, putative, expressed	AT1G54580.1	acyl carrier protein 2
A.E	Pavir.Ca02074.1.p|PACid:30206596	Pavir.Ca02074.1	6.20509416	2.633453102	0.006895	30206596	Pavir.Ca02074.1	LOC_Os12g25630.1	sulfite oxidase, putative, expressed	AT3G01910.1	sulfite oxidase
A.E	Pavir.Da00686.1.p|PACid:30194562	Pavir.Da00686.1	3.44085017	1.782765073	0.011764	30194562	Pavir.Da00686.1	LOC_Os06g39080.1	UDP-glucoronosyl and UDP-glucosyl transferase domain containing protein, expressed	AT2G15480.2	UDP-glucosyl transferase 73B5
A.E	Pavir.Da00810.1.p|PACid:30192346	Pavir.Da00810.1	0.17015685	-2.5550629	0.005982	30192346	Pavir.Da00810.1	LOC_Os06g35700.1	reticuline oxidase-like protein precursor, putative, expressed	AT4G20860.1	FAD-binding Berberine family protein
A.E	Pavir.Da01251.1.p|PACid:30191401	Pavir.Da01251.1	0.25867063	-1.950811828	0.017202	30191401	Pavir.Da01251.1	LOC_Os06g11310.1	plastocyanin-like domain containing protein, putative, expressed	AT2G15780.1	Cupredoxin superfamily protein
A.E	Pavir.Da02211.1.p|PACid:30191504	Pavir.Da02211.1	0.33652474	-1.571215538	0.000301	30191504	Pavir.Da02211.1	LOC_Os06g05660.1	NAP domain containing protein, putative, expressed	AT2G19480.1	nucleosome assembly protein 1;2
A.E	Pavir.Ea01573.1.p|PACid:30227608	Pavir.Ea01573.1	2.88434085	1.52824166	0.000506	30227608	Pavir.Ea01573.1	LOC_Os01g39860.1	1-aminocyclopropane-1-carboxylate oxidase protein, putative, expressed	AT2G19590.1	ACC oxidase 1
A.E	Pavir.Ea03384.1.p|PACid:30226667	Pavir.Ea03384.1	0.36714319	-1.445585273	0.024374
A.E	Pavir.Eb03845.1.p|PACid:30311172	Pavir.Eb03845.1	2.71098925	1.438819394	0.006727	30311172	Pavir.Eb03845.1	LOC_Os01g70770.1	glutathione S-transferase, putative, expressed	AT3G62760.1	Glutathione S-transferase family protein
A.E	Pavir.Fa02143.1.p|PACid:30186405	Pavir.Fa02143.1	0.39496842	-1.340190797	0.002585	30186405	Pavir.Fa02143.1	LOC_Os08g01450.1	cytochrome P450, putative, expressed	AT3G48280.1	cytochrome P450, family 71, subfamily A, polypeptide 25
A.E	Pavir.Ga01718.1.p|PACid:30303744	Pavir.Ga01718.1	0.39129039	-1.353688412	0.003685	30303744	Pavir.Ga01718.1	LOC_Os04g36750.1	hsp20/alpha crystallin family protein, putative, expressed	AT4G10250.1	HSP20-like chaperones superfamily protein
A.E	Pavir.Hb00966.1.p|PACid:30264185	Pavir.Hb00966.1	2.65419679	1.408275338	0.00222	30264185	Pavir.Hb00966.1	LOC_Os11g31090.1	transferase family protein, putative, expressed	AT5G41040.1	HXXXD-type acyl-transferase family protein
A.E	Pavir.Ia03444.2.p|PACid:30214088	Pavir.Ia03444.2	4.36266698	2.12521035	0.002053	30214088	Pavir.Ia03444.2	LOC_Os03g21040.2	stress responsive protein, putative, expressed	AT2G39050.1	hydroxyproline-rich glycoprotein family protein
A.E	Pavir.Ib02646.1.p|PACid:30238174	Pavir.Ib02646.1	2.62094672	1.390088027	0.006806	30238174	Pavir.Ib02646.1	LOC_Os10g02040.1	peroxidase precursor, putative, expressed	AT5G06720.1	peroxidase 2
A.E	Pavir.Ib02894.1.p|PACid:30237124	Pavir.Ib02894.1	3.38291612	1.758267405	0.027109	30237124	Pavir.Ib02894.1	LOC_Os10g09850.1	EF hand family protein, putative, expressed	AT4G38810.2	Calcium-binding EF-hand family protein
A.E	Pavir.J00683.1.p|PACid:30255035	Pavir.J00683.1	0.39686834	-1.333267623	3.51e-05	30255035	Pavir.J00683.1	LOC_Os01g62980.1	LTPL101 - Protease inhibitor/seed storage/LTP family protein precursor, expressed	AT5G05960.1	Bifunctional inhibitor/lipid-transfer protein/seed storage 2S albumin superfamily protein
A.E	Pavir.J01373.1.p|PACid:30219389	Pavir.J01373.1	2.9732804	1.572055524	0.005961	30219389	Pavir.J01373.1	LOC_Os08g43580.1	acyl carrier protein, putative, expressed	AT1G54580.1	acyl carrier protein 2
A.E	Pavir.J02298.1.p|PACid:30207734	Pavir.J02298.1	3.13463292	1.648296508	5.07e-05	30207734	Pavir.J02298.1	LOC_Os08g02120.1	kinase, pfkB family, putative, expressed	AT4G10260.1	pfkB-like carbohydrate kinase family protein
A.E	Pavir.J04268.1.p|PACid:30208451	Pavir.J04268.1	0.39869372	-1.326647223	0.000204	30208451	Pavir.J04268.1	LOC_Os01g61860.1	TBC domain containing protein, expressed	AT3G55020.1	Ypt/Rab-GAP domain of gyp1p superfamily protein
A.E	Pavir.J09458.1.p|PACid:30231778	Pavir.J09458.1	0.39072908	-1.355759471	0.000796	30231778	Pavir.J09458.1	LOC_Os04g41680.1	CHIT3 - Chitinase family protein precursor, expressed	AT3G54420.1	homolog of carrot EP3-3 chitinase
A.E	Pavir.J12532.1.p|PACid:30245869	Pavir.J12532.1	2.5778376	1.366161379	0.010815	30245869	Pavir.J12532.1	LOC_Os01g71060.1	xylanase inhibitor, putative, expressed	AT1G03220.1	Eukaryotic aspartyl protease family protein
A.E	Pavir.J15860.1.p|PACid:30275456	Pavir.J15860.1	0.33481338	-1.578570931	0.001182	30275456	Pavir.J15860.1	LOC_Os05g39690.1	oxidoreductase, aldo/keto reductase family protein, putative, expressed	AT2G37770.2	NAD(P)-linked oxidoreductase superfamily protein
A.E	Pavir.J27092.1.p|PACid:30208100	Pavir.J27092.1	2.98312955	1.576826631	0.000385	30208100	Pavir.J27092.1	LOC_Os01g68770.1	selenium-binding protein, putative, expressed	AT4G14030.1	selenium-binding protein 1
A.E	Pavir.J30395.1.p|PACid:30283707	Pavir.J30395.1	0.38299743	-1.384593386	0.000264	30283707	Pavir.J30395.1	LOC_Os01g09430.1	expressed protein	AT3G21360.1	2-oxoglutarate (2OG) and Fe(II)-dependent oxygenase superfamily protein
A.E	Pavir.J35962.1.p|PACid:30296188	Pavir.J35962.1	5.31273681	2.409455245	0.01787	30296188	Pavir.J35962.1	LOC_Os07g05570.1	ERD4 protein, putative, expressed	AT1G30360.1	Early-responsive to dehydration stress protein (ERD4)
A.RT	Pavir.Aa00133.1.p|PACid:30251688	Pavir.Aa00133.1	0.327482277	-1.610511262	0.006643	30251688	Pavir.Aa00133.1	LOC_Os02g56480.1	PB1 domain containing protein, expressed	AT5G64430.1	Octicosapeptide/Phox/Bem1p family protein
A.RT	Pavir.Aa00531.1.p|PACid:30253210	Pavir.Aa00531.1	0.364830172	-1.454703047	0.009669	30253210	Pavir.Aa00531.1	LOC_Os02g52150.1	heat shock 22 kDa protein, mitochondrial precursor, putative, expressed	AT5G51440.1	HSP20-like chaperones superfamily protein
A.RT	Pavir.Aa00752.1.p|PACid:30252862	Pavir.Aa00752.1	0.3741112	-1.418460939	0.000153	30252862	Pavir.Aa00752.1	LOC_Os02g50320.1	ATMAP70 protein, putative, expressed	AT1G24764.1	microtubule-associated proteins 70-2
A.RT	Pavir.Aa01581.1.p|PACid:30250764	Pavir.Aa01581.1	0.287986384	-1.79592749	0.005728
A.RT	Pavir.Aa02228.1.p|PACid:30253196	Pavir.Aa02228.1	0.336964496	-1.569331505	0.00398	30253196	Pavir.Aa02228.1	LOC_Os02g18410.1	salt stress root protein RS1, putative, expressed	AT4G20260.1	plasma-membrane associated cation-binding protein 1
A.RT	Pavir.Aa02378.1.p|PACid:30253859	Pavir.Aa02378.1	2.83626439	1.503992024	0.003579	30253859	Pavir.Aa02378.1	LOC_Os10g38730.1	glutathione S-transferase, putative, expressed	AT2G29420.1	glutathione S-transferase tau 7
A.RT	Pavir.Aa03031.1.p|PACid:30252171	Pavir.Aa03031.1	0.362607736	-1.463518391	0.002223	30252171	Pavir.Aa03031.1	LOC_Os02g10690.1	targeting protein for Xklp2, putative, expressed	AT4G32330.1	TPX2 (targeting protein for Xklp2) protein family
A.RT	Pavir.Aa03261.1.p|PACid:30252981	Pavir.Aa03261.1	0.22189426	-2.172055746	0.008652	30252981	Pavir.Aa03261.1	LOC_Os02g06290.1	rhodanese-like domain containing protein, putative, expressed	AT5G66170.3	sulfurtransferase 18
A.RT	Pavir.Aa03339.2.p|PACid:30250354	Pavir.Aa03339.2	0.376165229	-1.410561598	0.021173	30250354	Pavir.Aa03339.2	LOC_Os02g08300.2	RAD23 DNA repair protein, putative, expressed	AT1G79650.2	Rad23 UV excision repair protein family
A.RT	Pavir.Ab00047.1.p|PACid:30232437	Pavir.Ab00047.1	0.344897853	-1.535758945	0.003334	30232437	Pavir.Ab00047.1	LOC_Os02g01590.1	glycosyl hydrolases, putative, expressed	AT1G12240.1	Glycosyl hydrolases family 32 protein
A.RT	Pavir.Ab00994.1.p|PACid:30235342	Pavir.Ab00994.1	2.676374708	1.420280116	0.00446	30235342	Pavir.Ab00994.1	LOC_Os02g16620.1	reticulon domain containing protein, putative, expressed	AT4G11220.1	VIRB2-interacting protein 2
A.RT	Pavir.Ab01597.1.p|PACid:30232031	Pavir.Ab01597.1	0.30010086	-1.736480643	0.009706	30232031	Pavir.Ab01597.1	LOC_Os02g26370.1	wiskott-Aldrich syndrome protein family member 2, putative, expressed	AT2G18910.1	hydroxyproline-rich glycoprotein family protein
A.RT	Pavir.Ab02229.1.p|PACid:30234080	Pavir.Ab02229.1	0.1719029	-2.540334213	0.00136	30234080	Pavir.Ab02229.1	LOC_Os02g39140.1	helix-loop-helix DNA-binding domain containing protein, expressed	AT1G05805.1	basic helix-loop-helix (bHLH) DNA-binding superfamily protein
A.RT	Pavir.Ab03210.1.p|PACid:30233866	Pavir.Ab03210.1	2.868087187	1.520088881	0.024969	30233866	Pavir.Ab03210.1	LOC_Os02g57840.1	remorin C-terminal domain containing protein, putative, expressed	AT5G23750.1	Remorin family protein
A.RT	Pavir.Ba00296.1.p|PACid:30293679	Pavir.Ba00296.1	0.25565926	-1.967705814	4.51e-05	30293679	Pavir.Ba00296.1	LOC_Os01g16240.1	OsCam1-3 - Calmodulin, expressed	AT2G27030.3	calmodulin 5
A.RT	Pavir.Ba00312.1.p|PACid:30290372	Pavir.Ba00312.1	3.040456709	1.604288048	0.000379	30290372	Pavir.Ba00312.1	LOC_Os07g49330.1	phospholipase C, putative, expressed	AT2G40116.1	Phosphoinositide-specific phospholipase C family protein
A.RT	Pavir.Ba00344.1.p|PACid:30292007	Pavir.Ba00344.1	0.350673339	-1.511800346	0.011304	30292007	Pavir.Ba00344.1	LOC_Os07g43810.1	RNA recognition motif containing protein, putative, expressed	AT3G53460.1	chloroplast RNA-binding protein 29
A.RT	Pavir.Ba01202.1.p|PACid:30292301	Pavir.Ba01202.1	0.363741913	-1.459012922	0.015556	30292301	Pavir.Ba01202.1	LOC_Os09g36900.1	WD domain, G-beta repeat domain containing protein, expressed	AT4G35050.1	Transducin family protein / WD-40 repeat family protein
A.RT	Pavir.Ba01536.1.p|PACid:30291351	Pavir.Ba01536.1	0.369552393	-1.43614918	0.003004	30291351	Pavir.Ba01536.1	LOC_Os09g32964.1	peroxidase precursor, putative, expressed	AT5G67400.1	root hair specific 19
A.RT	Pavir.Ba01974.1.p|PACid:30289794	Pavir.Ba01974.1	3.32978312	1.735428213	0.001763	30289794	Pavir.Ba01974.1	LOC_Os09g29200.1	glutathione S-transferase, putative, expressed	AT2G29420.1	glutathione S-transferase tau 7
A.RT	Pavir.Ba02621.1.p|PACid:30291170	Pavir.Ba02621.1	2.816306924	1.493804569	0.000695	30291170	Pavir.Ba02621.1	LOC_Os09g39380.1	monodehydroascorbate reductase, putative, expressed	AT3G52880.1	monodehydroascorbate reductase 1
A.RT	Pavir.Ba03784.1.p|PACid:30293517	Pavir.Ba03784.1	0.362806214	-1.462728929	0.000178	30293517	Pavir.Ba03784.1	LOC_Os07g06460.1	expressed protein	AT1G14060.1	GCK domain-containing protein
A.RT	Pavir.Bb01875.1.p|PACid:30297231	Pavir.Bb01875.1	3.754133144	1.908479818	0.000465	30297231	Pavir.Bb01875.1	LOC_Os09g23540.1	dehydrogenase, putative, expressed	AT4G37980.1	elicitor-activated gene 3-1
A.RT	Pavir.Bb02852.1.p|PACid:30298946	Pavir.Bb02852.1	4.724116235	2.240044462	0.011854	30298946	Pavir.Bb02852.1	LOC_Os08g09200.1	aconitate hydratase protein, putative, expressed	AT2G05710.1	aconitase 3
A.RT	Pavir.Bb03348.1.p|PACid:30297629	Pavir.Bb03348.1	0.341008167	-1.552121804	0.004641	30297629	Pavir.Bb03348.1	LOC_Os07g42740.1	DUF1645 domain containing protein, putative, expressed	AT2G15760.1	Protein of unknown function (DUF1645)
A.RT	Pavir.Bb03524.1.p|PACid:30297224	Pavir.Bb03524.1	2.844608167	1.508229941	0.000742	30297224	Pavir.Bb03524.1	LOC_Os07g46830.1	sex determination protein tasselseed-2, putative, expressed	AT4G03140.1	NAD(P)-binding Rossmann-fold superfamily protein
A.RT	Pavir.Bb03722.1.p|PACid:30296861	Pavir.Bb03722.1	3.257192759	1.7036291	0.035598	30296861	Pavir.Bb03722.1	LOC_Os03g20680.1	late embryogenesis abundant protein 1, putative, expressed	AT2G36640.1	embryonic cell protein 63
A.RT	Pavir.Ca00576.1.p|PACid:30203639	Pavir.Ca00576.1	2.677798084	1.42104718	0.002856	30203639	Pavir.Ca00576.1	LOC_Os05g11250.1	lachrymatory factor synthase, putative, expressed	AT4G32870.1	Polyketide cyclase/dehydrase and lipid transport superfamily protein
A.RT	Pavir.Ca00664.1.p|PACid:30203140	Pavir.Ca00664.1	2.603290893	1.380336528	0.002468	30203140	Pavir.Ca00664.1	LOC_Os05g02510.1	beta-hexosaminidase precursor, putative, expressed	AT3G55260.1	beta-hexosaminidase 1
A.RT	Pavir.Ca01835.1.p|PACid:30203135	Pavir.Ca01835.1	3.055782545	1.611541882	0.033858	30203135	Pavir.Ca01835.1	LOC_Os05g47730.1	LTPL153 - Protease inhibitor/seed storage/LTP family protein precursor, expressed	AT3G18280.1	Bifunctional inhibitor/lipid-transfer protein/seed storage 2S albumin superfamily protein
A.RT	Pavir.Ca01850.1.p|PACid:30203800	Pavir.Ca01850.1	4.268699711	2.093796677	0.019807	30203800	Pavir.Ca01850.1	LOC_Os05g46480.3	late embryogenesis abundant protein, group 3, putative, expressed	AT1G52690.1	Late embryogenesis abundant protein (LEA) family protein
A.RT	Pavir.Ca01941.1.p|PACid:30204867	Pavir.Ca01941.1	3.598645944	1.847454168	0.00019	30204867	Pavir.Ca01941.1	LOC_Os12g16410.1	isoflavone reductase, putative, expressed	AT4G13660.1	pinoresinol reductase 2
A.RT	Pavir.Ca01986.1.p|PACid:30205594	Pavir.Ca01986.1	2.652723344	1.407474223	0.001077	30205594	Pavir.Ca01986.1	LOC_Os05g28040.1	DUF640 domain containing protein, putative, expressed	AT1G07090.1	Protein of unknown function (DUF640)
A.RT	Pavir.Ca02736.1.p|PACid:30205139	Pavir.Ca02736.1	0.383075288	-1.384300134	0.012448	30205139	Pavir.Ca02736.1	LOC_Os12g40890.1	OsIAA30 - Auxin-responsive Aux/IAA gene family member, expressed	AT3G04730.1	indoleacetic acid-induced protein 16
A.RT	Pavir.Cb00192.1.p|PACid:30269989	Pavir.Cb00192.1	2.666589436	1.414995716	0.00086	30269989	Pavir.Cb00192.1	LOC_Os12g41250.1	methylcrotonoyl-CoA carboxylase subunit alpha, mitochondrial precursor, putative, expressed	AT1G03090.2	methylcrotonyl-CoA carboxylase alpha chain, mitochondrial / 3-methylcrotonyl-CoA carboxylase 1 (MCCA)
A.RT	Pavir.Cb01083.1.p|PACid:30268849	Pavir.Cb01083.1	2.683045864	1.423871716	0.000874	30268849	Pavir.Cb01083.1	LOC_Os12g16410.1	isoflavone reductase, putative, expressed	AT1G32100.1	pinoresinol reductase 1
A.RT	Pavir.Cb01993.1.p|PACid:30269373	Pavir.Cb01993.1	2.858440113	1.515228065	0.001345	30269373	Pavir.Cb01993.1	LOC_Os11g07020.1	fructose-bisphospate aldolase isozyme, putative, expressed	AT4G38970.1	fructose-bisphosphate aldolase 2
A.RT	Pavir.Da00480.1.p|PACid:30192989	Pavir.Da00480.1	2.627436242	1.393655756	4.52e-05	30192989	Pavir.Da00480.1	LOC_Os06g42790.1	hydrolase, NUDIX family, domain containing protein, expressed	AT5G47650.1	nudix hydrolase homolog 2
A.RT	Pavir.Da01321.1.p|PACid:30193825	Pavir.Da01321.1	0.373813662	-1.419608797	0.015946	30193825	Pavir.Da01321.1	LOC_Os06g11620.1	RNA recognition motif containing protein, putative, expressed	AT5G65260.1	RNA-binding (RRM/RBD/RNP motifs) family protein
A.RT	Pavir.Da01650.1.p|PACid:30193562	Pavir.Da01650.1	3.23162236	1.692258618	0.000295	30193562	Pavir.Da01650.1	LOC_Os06g15990.1	aldehyde dehydrogenase, putative, expressed	AT1G23800.1	aldehyde dehydrogenase 2B7
A.RT	Pavir.Da01847.1.p|PACid:30194365	Pavir.Da01847.1	0.312189898	-1.679504239	0.005961	30194365	Pavir.Da01847.1	LOC_Os06g10310.1	growth regulating factor protein, putative, expressed	AT3G13960.1	growth-regulating factor 5
A.RT	Pavir.Db00148.1.p|PACid:30261912	Pavir.Db00148.1	4.08686142	2.030993324	0.008049	30261912	Pavir.Db00148.1	LOC_Os02g51440.1	laccase precursor protein, putative, expressed	AT5G09360.1	laccase 14
A.RT	Pavir.Db00940.1.p|PACid:30261690	Pavir.Db00940.1	0.356257242	-1.489008752	0.002722	30261690	Pavir.Db00940.1	LOC_Os06g20370.1	microtubule associated protein, putative, expressed	AT5G55230.1	microtubule-associated proteins 65-1
A.RT	Pavir.Db01330.1.p|PACid:30262394	Pavir.Db01330.1	0.375033747	-1.414907675	0.003509	30262394	Pavir.Db01330.1	LOC_Os06g33810.1	zinc finger protein, putative, expressed	AT4G23860.1	PHD finger protein-related
A.RT	Pavir.Db01451.1.p|PACid:30260620	Pavir.Db01451.1	3.134214435	1.648103889	5.05e-05	30260620	Pavir.Db01451.1	LOC_Os06g15990.1	aldehyde dehydrogenase, putative, expressed	AT1G23800.1	aldehyde dehydrogenase 2B7
A.RT	Pavir.Db02350.1.p|PACid:30262521	Pavir.Db02350.1	3.327629687	1.734494893	0.01163	30262521	Pavir.Db02350.1	LOC_Os06g04020.1	histone H1, putative, expressed	AT2G18050.1	histone H1-3
A.RT	Pavir.Ea00253.1.p|PACid:30228584	Pavir.Ea00253.1	3.373799708	1.754374328	0.00027	30228584	Pavir.Ea00253.1	LOC_Os04g02680.1	expressed protein	AT1G19980.1	cytomatrix protein-related
A.RT	Pavir.Ea01601.1.p|PACid:30230143	Pavir.Ea01601.1	2.766954667	1.468299007	4.61e-06	30230143	Pavir.Ea01601.1	LOC_Os01g40860.1	aldehyde dehydrogenase, putative, expressed	AT3G24503.1	aldehyde dehydrogenase 2C4
A.RT	Pavir.Ea01660.1.p|PACid:30229436	Pavir.Ea01660.1	0.281158031	-1.830546841	0.031837
A.RT	Pavir.Ea02629.1.p|PACid:30228858	Pavir.Ea02629.1	2.860451089	1.516242676	3.49e-05	30228858	Pavir.Ea02629.1	LOC_Os01g52010.1	alliin lyase precursor, putative, expressed	AT1G34060.1	Pyridoxal phosphate (PLP)-dependent transferases superfamily protein
A.RT	Pavir.Ea02798.1.p|PACid:30227120	Pavir.Ea02798.1	3.210181117	1.682654696	8.64e-05	30227120	Pavir.Ea02798.1	LOC_Os01g55830.1	glutathione S-transferase, putative, expressed	AT3G62760.1	Glutathione S-transferase family protein
A.RT	Pavir.Eb00895.1.p|PACid:30311995	Pavir.Eb00895.1	2.919903617	1.545920748	4.04e-06	30311995	Pavir.Eb00895.1	LOC_Os01g01660.1	isoflavone reductase, putative, expressed	AT1G75280.1	NmrA-like negative transcriptional regulator family protein
A.RT	Pavir.Eb02336.1.p|PACid:30308702	Pavir.Eb02336.1	4.756675477	2.249953601	0.044989	30308702	Pavir.Eb02336.1	LOC_Os01g65700.1	expressed protein	AT2G21100.1	Disease resistance-responsive (dirigent-like protein) family protein
A.RT	Pavir.Fa01907.1.p|PACid:30187176	Pavir.Fa01907.1	2.733278774	1.450632612	8.16e-05	30187176	Pavir.Fa01907.1	LOC_Os08g06100.1	O-methyltransferase, putative, expressed	AT5G54160.1	O-methyltransferase 1
A.RT	Pavir.Fb00323.1.p|PACid:30279021	Pavir.Fb00323.1	2.804466557	1.487726379	0.000185	30279021	Pavir.Fb00323.1	LOC_Os08g06100.1	O-methyltransferase, putative, expressed	AT5G54160.1	O-methyltransferase 1
A.RT	Pavir.Fb01280.1.p|PACid:30278487	Pavir.Fb01280.1	3.359265529	1.748145836	0.024376	30278487	Pavir.Fb01280.1	LOC_Os08g23870.1	late embryogenesis abundant group 1, putative, expressed	AT5G06760.1	Late Embryogenesis Abundant 4-5
A.RT	Pavir.Fb01946.1.p|PACid:30281080	Pavir.Fb01946.1	0.314920366	-1.666941034	0.006905	30281080	Pavir.Fb01946.1	LOC_Os08g39890.1	OsSPL14 - SBP-box gene family member, expressed	AT2G42200.1	squamosa promoter binding protein-like 9
A.RT	Pavir.Ga01149.1.p|PACid:30304549	Pavir.Ga01149.1	2.949826713	1.560630206	0.002961	30304549	Pavir.Ga01149.1	LOC_Os02g41860.3	aquaporin protein, putative, expressed	AT5G60660.1	plasma membrane intrinsic protein 2;4
A.RT	Pavir.Ga01477.1.p|PACid:30305934	Pavir.Ga01477.1	0.328306304	-1.606885641	0.000911
A.RT	Pavir.Ga01591.1.p|PACid:30302818	Pavir.Ga01591.1	0.348020398	-1.522756229	0.004233	30302818	Pavir.Ga01591.1	LOC_Os04g40400.1	eukaryotic translation initiation factor 4B, putative, expressed	AT3G26400.1	eukaryotic translation initiation factor 4B1
A.RT	Pavir.Ga01685.1.p|PACid:30302824	Pavir.Ga01685.1	2.756795361	1.462992179	6.56e-05	30302824	Pavir.Ga01685.1	LOC_Os04g37550.1	aspartic proteinase nepenthesin-2 precursor, putative, expressed	AT2G03200.1	Eukaryotic aspartyl protease family protein
A.RT	Pavir.Ga02283.1.p|PACid:30306035	Pavir.Ga02283.1	5.089022989	2.347388708	0.002495	30306035	Pavir.Ga02283.1	LOC_Os04g27980.1	glycosyl hydrolase, putative, expressed	AT5G24090.1	chitinase A
A.RT	Pavir.Gb01377.1.p|PACid:30222166	Pavir.Gb01377.1	0.269448811	-1.891916872	0.002706	30222166	Pavir.Gb01377.1	LOC_Os04g41229.1	helix-loop-helix DNA-binding domain containing protein, expressed	AT1G05805.1	basic helix-loop-helix (bHLH) DNA-binding superfamily protein
A.RT	Pavir.Gb01394.1.p|PACid:30223962	Pavir.Gb01394.1	3.147141405	1.654042002	3.16e-07	30223962	Pavir.Gb01394.1	LOC_Os04g41340.1	4-nitrophenylphosphatase, putative, expressed	AT5G36700.1	2-phosphoglycolate phosphatase 1
A.RT	Pavir.Ia00209.1.p|PACid:30210701	Pavir.Ia00209.1	0.163131579	-2.615892008	0.011942	30210701	Pavir.Ia00209.1	LOC_Os03g61960.1	2Fe-2S iron-sulfur cluster binding domain containing protein, expressed	AT2G27510.1	ferredoxin 3
A.RT	Pavir.Ia01519.1.p|PACid:30215029	Pavir.Ia01519.1	3.251254158	1.700996339	0.003478	30215029	Pavir.Ia01519.1	LOC_Os10g36760.1	OsProCP3 - Putative Lysosomal Pro-x Carboxypeptidase homologue, expressed	AT4G36195.1	Serine carboxypeptidase S28 family protein
A.RT	Pavir.Ia02396.1.p|PACid:30212640	Pavir.Ia02396.1	2.62742109	1.393647436	0.000356	30212640	Pavir.Ia02396.1	LOC_Os10g39970.1	harpin-induced protein 1 domain containing protein, expressed	AT5G22870.1	Late embryogenesis abundant (LEA) hydroxyproline-rich glycoprotein family
A.RT	Pavir.Ia02970.1.p|PACid:30212909	Pavir.Ia02970.1	2.694005498	1.429752795	0.002262	30212909	Pavir.Ia02970.1	LOC_Os03g32470.1	leucoanthocyanidin dioxygenase, putative, expressed	AT1G17020.1	senescence-related gene 1
A.RT	Pavir.Ib00373.1.p|PACid:30239191	Pavir.Ib00373.1	2.771877198	1.470863344	0.016938	30239191	Pavir.Ib00373.1	LOC_Os03g06360.1	late embryogenesis abundant protein D-34, putative, expressed	AT3G22490.1	Seed maturation protein
A.RT	Pavir.Ib00795.1.p|PACid:30240552	Pavir.Ib00795.1	0.333854435	-1.582708891	0.001555	30240552	Pavir.Ib00795.1	LOC_Os03g12290.1	glutamine synthetase, catalytic domain containing protein, expressed	AT5G37600.1	glutamine synthase clone R1
A.RT	Pavir.Ib01055.1.p|PACid:30240574	Pavir.Ib01055.1	0.2460663	-2.022881008	0.000317	30240574	Pavir.Ib01055.1	LOC_Os03g14810.1	MYB-like transcription factor DIVARICATA, putative, expressed	AT4G39250.1	RAD-like 1
A.RT	Pavir.Ib01088.1.p|PACid:30238520	Pavir.Ib01088.1	3.01538747	1.592343397	0.000803	30238520	Pavir.Ib01088.1	LOC_Os04g40930.1	MYB family transcription factor, putative, expressed	AT1G13450.3	Homeodomain-like superfamily protein
A.RT	Pavir.Ib01333.1.p|PACid:30237515	Pavir.Ib01333.1	0.37538181	-1.413569351	0.010439	30237515	Pavir.Ib01333.1	LOC_Os03g17760.1	RNA recognition motif containing protein, putative, expressed	AT3G54770.1	RNA-binding (RRM/RBD/RNP motifs) family protein
A.RT	Pavir.Ib01492.1.p|PACid:30242719	Pavir.Ib01492.1	2.656394448	1.409469388	0.004876	30242719	Pavir.Ib01492.1	LOC_Os03g20420.1	alpha-N-arabinofuranosidase A, putative, expressed	AT3G10740.1	alpha-L-arabinofuranosidase 1
A.RT	Pavir.Ib01762.1.p|PACid:30238565	Pavir.Ib01762.1	0.352161852	-1.505689459	0.017717	30238565	Pavir.Ib01762.1	LOC_Os03g25330.1	peroxidase precursor, putative, expressed	AT5G58390.1	Peroxidase superfamily protein
A.RT	Pavir.Ib02451.1.p|PACid:30237204	Pavir.Ib02451.1	0.314788638	-1.667544624	0.00449	30237204	Pavir.Ib02451.1	LOC_Os10g39170.1	peroxidase precursor, putative, expressed	AT1G05260.1	Peroxidase superfamily protein
A.RT	Pavir.Ib04405.1.p|PACid:30240108	Pavir.Ib04405.1	3.124365222	1.643563107	0.000299	30240108	Pavir.Ib04405.1	LOC_Os03g52860.1	lipoxygenase, putative, expressed	AT1G55020.1	lipoxygenase 1
A.RT	Pavir.Ib04454.1.p|PACid:30240301	Pavir.Ib04454.1	0.288277533	-1.794469688	0.001736	30240301	Pavir.Ib04454.1	LOC_Os03g64190.1	la domain containing protein, putative, expressed	AT5G66100.1	winged-helix DNA-binding transcription factor family protein
A.RT	Pavir.J01056.1.p|PACid:30208403	Pavir.J01056.1	2.646053277	1.40384211	0.019438	30208403	Pavir.J01056.1	LOC_Os10g40700.1	expansin precursor, putative, expressed	AT1G65680.1	expansin B2
A.RT	Pavir.J03245.1.p|PACid:30195944	Pavir.J03245.1	3.089323354	1.627290883	0.003674	30195944	Pavir.J03245.1	LOC_Os12g38750.1	nucleotide pyrophosphatase/phosphodiesterase, putative, expressed	AT1G13750.1	Purple acid phosphatases superfamily protein
A.RT	Pavir.J05562.1.p|PACid:30267394	Pavir.J05562.1	4.219643153	2.077120998	0.016063	30267394	Pavir.J05562.1	LOC_Os06g04020.1	histone H1, putative, expressed	AT2G18050.1	histone H1-3
A.RT	Pavir.J05898.1.p|PACid:30283360	Pavir.J05898.1	3.120798871	1.641915382	0.002156	30283360	Pavir.J05898.1	LOC_Os12g02340.1	LTPL14 - Protease inhibitor/seed storage/LTP family protein precursor, expressed	AT5G59320.1	lipid transfer protein 3
A.RT	Pavir.J06115.1.p|PACid:30200586	Pavir.J06115.1	3.102704913	1.633526494	0.002887	30200586	Pavir.J06115.1	LOC_Os11g02369.1	LTPL7 - Protease inhibitor/seed storage/LTP family protein precursor, expressed	AT3G51590.1	lipid transfer protein 12
A.RT	Pavir.J06165.1.p|PACid:30286075	Pavir.J06165.1	2.635122955	1.39787028	0.001696	30286075	Pavir.J06165.1	LOC_Os03g62370.1	WD40-like Beta Propeller Repeat family protein, expressed	AT1G21680.1	DPP6 N-terminal domain-like protein
A.RT	Pavir.J06287.1.p|PACid:30216892	Pavir.J06287.1	3.518979068	1.815156932	1.28e-05	30216892	Pavir.J06287.1	LOC_Os11g20090.1	O-methyltransferase, putative, expressed	AT4G35160.1	O-methyltransferase family protein
A.RT	Pavir.J10537.1.p|PACid:30216759	Pavir.J10537.1	3.760316939	1.910854265	0.00021	30216759	Pavir.J10537.1	LOC_Os11g03290.1	nucleoside-triphosphatase, putative, expressed	AT3G04080.1	apyrase 1
A.RT	Pavir.J12222.1.p|PACid:30220846	Pavir.J12222.1	0.384185554	-1.380124822	0.008481	30220846	Pavir.J12222.1	LOC_Os11g36340.1	lymphoid organ expressed yellow head virus receptor protein, putative, expressed	AT2G35880.1	TPX2 (targeting protein for Xklp2) protein family
A.RT	Pavir.J13426.1.p|PACid:30294491	Pavir.J13426.1	0.379548438	-1.397644082	0.003864	30294491	Pavir.J13426.1	LOC_Os04g40940.1	mitotic spindle checkpoint protein MAD2, putative, expressed	AT3G25980.1	DNA-binding HORMA family protein
A.RT	Pavir.J14539.1.p|PACid:30270680	Pavir.J14539.1	2.64211648	1.40169407	0.002707	30270680	Pavir.J14539.1	LOC_Os05g51670.1	NAD dependent epimerase/dehydratase family protein, putative, expressed	AT4G23920.1	UDP-D-glucose/UDP-D-galactose 4-epimerase 2
A.RT	Pavir.J15962.1.p|PACid:30284434	Pavir.J15962.1	2.893718304	1.532924486	0.003967	30284434	Pavir.J15962.1	LOC_Os05g51440.1	hsp20/alpha crystallin family protein, putative, expressed	AT5G20970.1	HSP20-like chaperones superfamily protein
A.RT	Pavir.J20077.2.p|PACid:30315093	Pavir.J20077.2	0.2636828	-1.923124625	0.000743	30315093	Pavir.J20077.2	LOC_Os02g18410.1	salt stress root protein RS1, putative, expressed	AT4G20260.1	plasma-membrane associated cation-binding protein 1
A.RT	Pavir.J21399.1.p|PACid:30244292	Pavir.J21399.1	2.759393831	1.464351378	0.011664	30244292	Pavir.J21399.1	LOC_Os04g40600.1	peptide methionine sulfoxide reductase, putative, expressed	AT5G07470.1	peptidemethionine sulfoxide reductase 3
A.RT	Pavir.J21702.1.p|PACid:30200504	Pavir.J21702.1	0.32086976	-1.639940263	0.006172	30200504	Pavir.J21702.1	LOC_Os07g03070.1	tetratricopeptide repeat containing protein, putative, expressed	AT4G37210.1	Tetratricopeptide repeat (TPR)-like superfamily protein
A.RT	Pavir.J22292.1.p|PACid:30197503	Pavir.J22292.1	3.096982501	1.630863231	0.001002	30197503	Pavir.J22292.1	LOC_Os11g38650.1	UDP-glucoronosyl/UDP-glucosyl transferase, putative, expressed	AT1G01420.1	UDP-glucosyl transferase 72B3
A.RT	Pavir.J25095.1.p|PACid:30202392	Pavir.J25095.1	0.373983604	-1.418953073	0.007191
A.RT	Pavir.J27962.1.p|PACid:30244694	Pavir.J27962.1	0.337720907	-1.566096601	0.000329	30244694	Pavir.J27962.1	LOC_Os04g52130.1	coproporphyrinogen III oxidase, chloroplast precursor, putative, expressed	AT1G03475.1	Coproporphyrinogen III oxidase
A.RT	Pavir.J31761.1.p|PACid:30200355	Pavir.J31761.1	0.303162667	-1.721835991	0.013789
A.RT	Pavir.J32739.1.p|PACid:30197342	Pavir.J32739.1	2.678278001	1.421305718	0.040806	30197342	Pavir.J32739.1	LOC_Os01g71690.3	recA protein, expressed	AT3G57260.1	beta-1,3-glucanase 2
A.RT	Pavir.J34355.1.p|PACid:30220017	Pavir.J34355.1	5.045654401	2.335041393	0.000199	30220017	Pavir.J34355.1	LOC_Os05g39250.1	phosphatidylethanolamine-binding protein, putative, expressed	AT5G01300.1	PEBP (phosphatidylethanolamine-binding protein) family protein
A.RT	Pavir.J35054.1.p|PACid:30225162	Pavir.J35054.1	2.974132008	1.572468683	0.000973	30225162	Pavir.J35054.1	LOC_Os07g06590.1	ML domain protein, putative, expressed	AT3G11780.1	MD-2-related lipid recognition domain-containing protein / ML domain-containing protein
A.RT	Pavir.J35507.1.p|PACid:30275720	Pavir.J35507.1	0.375394074	-1.41352222	0.011771	30275720	Pavir.J35507.1	LOC_Os01g66300.1	KH domain containing protein, putative, expressed	AT5G51300.1	splicing factor-related
A.RT	Pavir.J37193.1.p|PACid:30197386	Pavir.J37193.1	2.849098661	1.510505581	0.001183	30197386	Pavir.J37193.1	LOC_Os03g49350.1	lipozygenase protein, putative, expressed	AT3G22400.1	PLAT/LH2 domain-containing lipoxygenase family protein
A.RT	Pavir.J37978.1.p|PACid:30197137	Pavir.J37978.1	2.752103371	1.46053466	0.003046	30197137	Pavir.J37978.1	LOC_Os03g16030.1	hsp20/alpha crystallin family protein, putative, expressed	AT5G59720.1	heat shock protein 18.2
A.RT	Pavir.J40731.1.p|PACid:30255060	Pavir.J40731.1	3.772981192	1.915704908	0.000569	30255060	Pavir.J40731.1	LOC_Os03g20120.1	glycosyl transferase 8 domain containing protein, putative, expressed	AT2G47180.1	galactinol synthase 1
A.RT	Pavir.Aa00282.1.p|PACid:30253178	Pavir.Aa00282.1	2.898030307	1.535072682	0.000311	30253178	Pavir.Aa00282.1	LOC_Os02g54140.1	hsp20/alpha crystallin family protein, putative, expressed	AT1G54050.1	HSP20-like chaperones superfamily protein
A.RT	Pavir.Aa01363.1.p|PACid:30251544	Pavir.Aa01363.1	11.9759629	3.582069752	0.002261	30251544	Pavir.Aa01363.1	LOC_Os02g39930.1	OsTIL-1 Temperature-induced lipocalin-1, expressed	AT5G58070.1	temperature-induced lipocalin
A.RT	Pavir.Aa01512.1.p|PACid:30252328	Pavir.Aa01512.1	4.468826509	2.159896037	0.001764	30252328	Pavir.Aa01512.1	LOC_Os02g35940.1	gibberellin receptor GID1L2, putative, expressed	AT1G47480.1	alpha/beta-Hydrolases superfamily protein
A.RT	Pavir.Aa01553.1.p|PACid:30251686	Pavir.Aa01553.1	0.23396367	-2.095643569	0.001876	30251686	Pavir.Aa01553.1	LOC_Os02g36710.1	SET, putative, expressed	AT1G18800.1	NAP1-related protein 2
A.RT	Pavir.Aa01736.1.p|PACid:30251876	Pavir.Aa01736.1	0.213541118	-2.227414201	0.016216
A.RT	Pavir.Aa01798.1.p|PACid:30252817	Pavir.Aa01798.1	4.784770616	2.258449763	0.001321
A.RT	Pavir.Aa02737.1.p|PACid:30249647	Pavir.Aa02737.1	6.136124788	2.617327823	0.017493	30249647	Pavir.Aa02737.1	LOC_Os02g15250.1	late embryogenesis abundant domain-containing protein, putative, expressed	AT5G44310.2	Late embryogenesis abundant protein (LEA) family protein
A.RT	Pavir.Aa03322.1.p|PACid:30251014	Pavir.Aa03322.1	0.357960051	-1.482129505	0.012162	30251014	Pavir.Aa03322.1	LOC_Os02g07410.1	glycine cleavage system H protein, putative, expressed	AT2G35120.1	Single hybrid motif superfamily protein
A.RT	Pavir.Ab00731.1.p|PACid:30236320	Pavir.Ab00731.1	5.407822259	2.435047735	0.004638	30236320	Pavir.Ab00731.1	LOC_Os02g10710.1	hsp20/alpha crystallin family protein, putative, expressed	AT1G52560.1	HSP20-like chaperones superfamily protein
A.RT	Pavir.Ab02053.1.p|PACid:30235451	Pavir.Ab02053.1	5.138243205	2.361275178	0.003757	30235451	Pavir.Ab02053.1	LOC_Os02g35940.1	gibberellin receptor GID1L2, putative, expressed	AT1G47480.1	alpha/beta-Hydrolases superfamily protein
A.RT	Pavir.Ab02274.1.p|PACid:30236541	Pavir.Ab02274.1	9.386612482	3.2306046	0.003398	30236541	Pavir.Ab02274.1	LOC_Os02g39930.1	OsTIL-1 Temperature-induced lipocalin-1, expressed	AT5G58070.1	temperature-induced lipocalin
A.RT	Pavir.Ab02318.1.p|PACid:30235492	Pavir.Ab02318.1	3.113409451	1.638495321	1.96e-05	30235492	Pavir.Ab02318.1	LOC_Os02g40500.1	OsGrx_C2.1 - glutaredoxin subgroup I, expressed	AT5G40370.1	Glutaredoxin family protein
A.RT	Pavir.Ab02893.1.p|PACid:30235608	Pavir.Ab02893.1	20.41454443	4.351525468	0.009193
A.RT	Pavir.Ba00222.1.p|PACid:30290494	Pavir.Ba00222.1	6.02171281	2.590173904	0.001112	30290494	Pavir.Ba00222.1	LOC_Os07g48160.1	alpha-galactosidase precursor, putative, expressed	AT3G56310.1	Melibiase family protein
A.RT	Pavir.Ba00494.1.p|PACid:30290691	Pavir.Ba00494.1	0.217915986	-2.198156064	0.016039	30290691	Pavir.Ba00494.1	LOC_Os07g42910.1	cytochrome c oxidase subunit, putative, expressed	AT1G22450.1	cytochrome C oxidase 6B
A.RT	Pavir.Ba01470.1.p|PACid:30290050	Pavir.Ba01470.1	0.351630905	-1.507866221	0.023402	30290050	Pavir.Ba01470.1	LOC_Os07g29320.1	rRNA-processing protein EBP2, putative, expressed	AT3G22660.1	rRNA processing protein-related
A.RT	Pavir.Ba01698.1.p|PACid:30291323	Pavir.Ba01698.1	0.336381993	-1.571827615	0.00064	30291323	Pavir.Ba01698.1	LOC_Os09g31486.1	DnaK family protein, putative, expressed	AT5G09590.1	mitochondrial HSO70 2
A.RT	Pavir.Bb00247.1.p|PACid:30298381	Pavir.Bb00247.1	4.763966716	2.252163334	0.004589	30298381	Pavir.Bb00247.1	LOC_Os07g04910.1	reticulon domain containing protein, putative, expressed	AT3G10260.3	Reticulon family protein
A.RT	Pavir.Bb00661.1.p|PACid:30300127	Pavir.Bb00661.1	3.349909319	1.744122043	0.002087
A.RT	Pavir.Bb00974.1.p|PACid:30298341	Pavir.Bb00974.1	6.074398135	2.60274147	0.00039	30298341	Pavir.Bb00974.1	LOC_Os09g30458.1	subtilisin-like protease, putative, expressed	AT1G20160.1	Subtilisin-like serine endopeptidase family protein
A.RT	Pavir.Bb01257.1.p|PACid:30298750	Pavir.Bb01257.1	4.597824358	2.200951355	0.006689
A.RT	Pavir.Bb01503.1.p|PACid:30300143	Pavir.Bb01503.1	6.252757786	2.644492632	0.000355	30300143	Pavir.Bb01503.1	LOC_Os11g24374.1	OsSCP55 - Putative Serine Carboxypeptidase homologue, expressed	AT2G22980.1	serine carboxypeptidase-like 13
A.RT	Pavir.Bb01893.1.p|PACid:30297522	Pavir.Bb01893.1	3.105851636	1.634988915	0.001187	30297522	Pavir.Bb01893.1	LOC_Os09g23160.1	annexin, putative, expressed	AT1G68090.1	annexin 5
A.RT	Pavir.Bb02409.1.p|PACid:30298298	Pavir.Bb02409.1	3.708978605	1.891021946	0.016058	30298298	Pavir.Bb02409.1	LOC_Os09g30438.2	expressed protein	AT2G33690.1	Late embryogenesis abundant protein, group 6
A.RT	Pavir.Bb02517.1.p|PACid:30300573	Pavir.Bb02517.1	0.366344916	-1.448725501	0.003726	30300573	Pavir.Bb02517.1	LOC_Os09g29830.3	helix-loop-helix DNA-binding domain containing protein, expressed	AT1G68920.3	basic helix-loop-helix (bHLH) DNA-binding superfamily protein
A.RT	Pavir.Bb02686.1.p|PACid:30297191	Pavir.Bb02686.1	0.212708505	-2.233050379	0.009348	30297191	Pavir.Bb02686.1	LOC_Os08g43580.1	acyl carrier protein, putative, expressed	AT1G54580.1	acyl carrier protein 2
A.RT	Pavir.Bb03197.1.p|PACid:30299608	Pavir.Bb03197.1	6.62831482	2.728642127	0.043978	30299608	Pavir.Bb03197.1	LOC_Os03g46070.1	thaumatin, putative, expressed	AT4G11650.1	osmotin 34
A.RT	Pavir.Ca00347.1.p|PACid:30205712	Pavir.Ca00347.1	3.415634091	1.77215343	0.001971	30205712	Pavir.Ca00347.1	LOC_Os12g15470.2	OsSCP65 - Putative Serine Carboxypeptidase homologue, expressed	AT4G12910.1	serine carboxypeptidase-like 20
A.RT	Pavir.Ca00381.1.p|PACid:30203810	Pavir.Ca00381.1	3.018416823	1.593792046	0.001973	30203810	Pavir.Ca00381.1	LOC_Os12g12470.1	NADP-dependent oxidoreductase, putative, expressed	AT5G16970.1	alkenal reductase
A.RT	Pavir.Ca00608.1.p|PACid:30204384	Pavir.Ca00608.1	3.672168313	1.876632186	0.000545	30204384	Pavir.Ca00608.1	LOC_Os12g36210.1	inhibitor I family protein, putative, expressed	AT2G38870.1	Serine protease inhibitor, potato inhibitor I-type family protein
A.RT	Pavir.Ca00609.1.p|PACid:30204579	Pavir.Ca00609.1	3.037824469	1.603038511	2.19e-05	30204579	Pavir.Ca00609.1	LOC_Os12g25090.2	expressed protein	AT2G38870.1	Serine protease inhibitor, potato inhibitor I-type family protein
A.RT	Pavir.Ca00811.1.p|PACid:30204135	Pavir.Ca00811.1	4.03343156	2.012007776	0.011557	30204135	Pavir.Ca00811.1	LOC_Os05g10210.1	HAD superfamily phosphatase, putative, expressed	AT4G25150.1	HAD superfamily, subfamily IIIB acid phosphatase
A.RT	Pavir.Ca00875.1.p|PACid:30206961	Pavir.Ca00875.1	0.284127837	-1.815387909	0.005883	30206961	Pavir.Ca00875.1	LOC_Os05g48030.1	anti-silencing protein, ASF1-like domain containing protein, expressed	AT5G38110.1	anti- silencing function 1b
A.RT	Pavir.Ca01780.1.p|PACid:30206225	Pavir.Ca01780.1	12.14970794	3.602849729	0.016215	30206225	Pavir.Ca01780.1	LOC_Os05g46480.1	late embryogenesis abundant protein, group 3, putative, expressed	AT3G15670.1	Late embryogenesis abundant protein (LEA) family protein
A.RT	Pavir.Ca02020.1.p|PACid:30206257	Pavir.Ca02020.1	3.633483425	1.861353325	0.000458	30206257	Pavir.Ca02020.1	LOC_Os12g24170.1	beta-galactosidase precursor, putative, expressed	AT2G32810.1	beta galactosidase 9
A.RT	Pavir.Ca02189.1.p|PACid:30206971	Pavir.Ca02189.1	5.615792779	2.489489702	0.018822	30206971	Pavir.Ca02189.1	LOC_Os12g29400.1	GRAM domain containing protein, expressed	AT5G13200.1	GRAM domain family protein
A.RT	Pavir.Cb00662.1.p|PACid:30269981	Pavir.Cb00662.1	6.38650569	2.675026792	0.019153	30269981	Pavir.Cb00662.1	LOC_Os11g26790.1	dehydrin, putative, expressed	AT5G66400.1	Dehydrin family protein
A.RT	Pavir.Cb00701.1.p|PACid:30268632	Pavir.Cb00701.1	0.338083129	-1.564550071	0.008428	30268632	Pavir.Cb00701.1	LOC_Os12g25630.1	sulfite oxidase, putative, expressed	AT3G01910.1	sulfite oxidase
A.RT	Pavir.Cb00879.1.p|PACid:30269771	Pavir.Cb00879.1	0.247018271	-2.01731034	0.000502
A.RT	Pavir.Cb00901.1.p|PACid:30269979	Pavir.Cb00901.1	0.254677169	-1.973258462	0.01265	30269979	Pavir.Cb00901.1	LOC_Os12g34890.1	acyl carrier protein, putative, expressed	AT4G25050.1	acyl carrier protein 4
A.RT	Pavir.Cb00980.1.p|PACid:30269537	Pavir.Cb00980.1	3.029915151	1.599277393	0.002287	30269537	Pavir.Cb00980.1	LOC_Os12g24170.1	beta-galactosidase precursor, putative, expressed	AT2G32810.1	beta galactosidase 9
A.RT	Pavir.Cb02121.1.p|PACid:30267871	Pavir.Cb02121.1	5.040411787	2.333541602	0.006332	30267871	Pavir.Cb02121.1	LOC_Os11g03730.1	alpha-N-arabinofuranosidase A, putative, expressed	AT3G10740.1	alpha-L-arabinofuranosidase 1
A.RT	Pavir.Da00449.1.p|PACid:30194478	Pavir.Da00449.1	2.944994749	1.558265062	0.006075	30194478	Pavir.Da00449.1	LOC_Os02g09150.1	inorganic H+ pyrophosphatase, putative, expressed	AT1G15690.1	Inorganic H pyrophosphatase family protein
A.RT	Pavir.Da00795.1.p|PACid:30194578	Pavir.Da00795.1	3.73237664	1.900094578	0.010124	30194578	Pavir.Da00795.1	LOC_Os01g71080.1	xylanase inhibitor, putative, expressed	AT1G03230.1	Eukaryotic aspartyl protease family protein
A.RT	Pavir.Da01632.1.p|PACid:30191845	Pavir.Da01632.1	2.749642981	1.459244308	0.012755	30191845	Pavir.Da01632.1	LOC_Os06g23350.1	late embryogenesis abundant protein D-34, putative, expressed	AT3G22490.1	Seed maturation protein
A.RT	Pavir.Da02211.1.p|PACid:30191504	Pavir.Da02211.1	0.378126996	-1.403057241	0.001337	30191504	Pavir.Da02211.1	LOC_Os06g05660.1	NAP domain containing protein, putative, expressed	AT2G19480.1	nucleosome assembly protein 1;2
A.RT	Pavir.Da02337.1.p|PACid:30193209	Pavir.Da02337.1	3.250937952	1.700856021	1.94e-05	30193209	Pavir.Da02337.1	LOC_Os06g04460.1	hypersensitive-induced response protein, putative, expressed	AT5G51570.1	SPFH/Band 7/PHB domain-containing membrane-associated protein family
A.RT	Pavir.Da02439.1.p|PACid:30193736	Pavir.Da02439.1	3.033666646	1.601062564	0.010152	30193736	Pavir.Da02439.1	LOC_Os06g01360.1	homogentisate 1,2-dioxygenase, putative, expressed	AT5G54080.1	homogentisate 1,2-dioxygenase
A.RT	Pavir.Db00371.1.p|PACid:30262621	Pavir.Db00371.1	2.948428546	1.559946232	0.002905	30262621	Pavir.Db00371.1	LOC_Os06g46372.1	dehydrogenase, putative, expressed	AT4G20930.1	6-phosphogluconate dehydrogenase family protein
A.RT	Pavir.Db01185.1.p|PACid:30262670	Pavir.Db01185.1	3.769253943	1.914278996	0.001691	30262670	Pavir.Db01185.1	LOC_Os06g30750.1	reticulon domain containing protein, putative, expressed	AT4G11220.1	VIRB2-interacting protein 2
A.RT	Pavir.Db01776.1.p|PACid:30261030	Pavir.Db01776.1	2.828952044	1.500267721	0.008323	30261030	Pavir.Db01776.1	LOC_Os06g13720.1	dehydrogenase E1 component domain containing protein, expressed	AT1G24180.1	Thiamin diphosphate-binding fold (THDP-binding) superfamily protein
A.RT	Pavir.Ea00101.1.p|PACid:30231090	Pavir.Ea00101.1	3.030297158	1.599459275	0.014568	30231090	Pavir.Ea00101.1	LOC_Os01g12660.1	AAA-type ATPase family protein, putative, expressed	AT1G64110.3	P-loop containing nucleoside triphosphate hydrolases superfamily protein
A.RT	Pavir.Ea00295.1.p|PACid:30226575	Pavir.Ea00295.1	4.114568305	2.040741073	0.00482	30226575	Pavir.Ea00295.1	LOC_Os06g14400.1	1-aminocyclopropane-1-carboxylate oxidase homolog 4, putative, expressed	AT1G03400.1	2-oxoglutarate (2OG) and Fe(II)-dependent oxygenase superfamily protein
A.RT	Pavir.Ea00389.1.p|PACid:30228609	Pavir.Ea00389.1	2.880085168	1.526111475	0.000545	30228609	Pavir.Ea00389.1	LOC_Os01g07780.1	embryo-specific 3, putative, expressed	AT5G62200.1	Embryo-specific protein 3, (ATS3)
A.RT	Pavir.Ea00473.1.p|PACid:30231117	Pavir.Ea00473.1	3.126934171	1.644748848	0.000523	30231117	Pavir.Ea00473.1	LOC_Os01g06060.1	gibberellin receptor GID1L2, putative, expressed	AT5G06570.1	alpha/beta-Hydrolases superfamily protein
A.RT	Pavir.Ea00501.1.p|PACid:30230246	Pavir.Ea00501.1	3.828367304	1.936729253	0.018725	30230246	Pavir.Ea00501.1	LOC_Os01g05650.1	metallothionein, putative, expressed	AT3G09390.1	metallothionein 2A
A.RT	Pavir.Ea00606.1.p|PACid:30226304	Pavir.Ea00606.1	6.160014685	2.62293379	0.003551	30226304	Pavir.Ea00606.1	LOC_Os01g04370.1	hsp20/alpha crystallin family protein, putative, expressed	AT5G59720.1	heat shock protein 18.2
A.RT	Pavir.Ea01029.1.p|PACid:30228283	Pavir.Ea01029.1	9.64320064	3.269512066	0.000342
A.RT	Pavir.Ea01261.1.p|PACid:30231507	Pavir.Ea01261.1	3.013956484	1.591658587	0.0122	30231507	Pavir.Ea01261.1	LOC_Os04g59260.1	peroxidase precursor, putative, expressed	AT1G71695.1	Peroxidase superfamily protein
A.RT	Pavir.Ea01371.1.p|PACid:30230510	Pavir.Ea01371.1	16.26134936	4.023375072	0.000808	30230510	Pavir.Ea01371.1	LOC_Os01g32330.1	heavy metal-associated domain containing protein, expressed	AT1G71050.1	Heavy metal transport/detoxification superfamily protein
A.RT	Pavir.Ea01561.1.p|PACid:30227923	Pavir.Ea01561.1	14.2563018	3.833527879	0.005706	30227923	Pavir.Ea01561.1	LOC_Os07g35680.1	TKL_IRAK_DUF26-lc22 - DUF26 kinases have homology to DUF26 containing loci, expressed	AT4G23180.1	cysteine-rich RLK (RECEPTOR-like protein kinase) 10
A.RT	Pavir.Ea02163.1.p|PACid:30231351	Pavir.Ea02163.1	0.292472231	-1.773628443	0.01764	30231351	Pavir.Ea02163.1	LOC_Os01g42650.1	cytochrome c oxidase subunit 5B, mitochondrial precursor, putative, expressed	AT3G15640.1	Rubredoxin-like superfamily protein
A.RT	Pavir.Ea02270.1.p|PACid:30227344	Pavir.Ea02270.1	11.84260249	3.565914252	0.019838
A.RT	Pavir.Ea02477.1.p|PACid:30226286	Pavir.Ea02477.1	3.528773409	1.819166794	0.04518	30226286	Pavir.Ea02477.1	LOC_Os01g49320.1	glycosyl hydrolase, putative, expressed	AT5G24090.1	chitinase A
A.RT	Pavir.Ea02497.1.p|PACid:30228113	Pavir.Ea02497.1	5.707870145	2.512952514	0.000773	30228113	Pavir.Ea02497.1	LOC_Os01g49710.1	glutathione S-transferase, putative, expressed	AT1G10360.1	glutathione S-transferase TAU 18
A.RT	Pavir.Ea02555.1.p|PACid:30227938	Pavir.Ea02555.1	14.44207351	3.852205986	0.010856
A.RT	Pavir.Ea02983.1.p|PACid:30228167	Pavir.Ea02983.1	8.225401165	3.040086043	0.002658	30228167	Pavir.Ea02983.1	LOC_Os01g54030.1	NADP-dependent malic enzyme, putative, expressed	AT1G79750.1	NADP-malic enzyme 4
A.RT	Pavir.Ea03286.1.p|PACid:30226410	Pavir.Ea03286.1	3.089698079	1.627465867	0.000409	30226410	Pavir.Ea03286.1	LOC_Os01g61230.1	dihydroflavonol-4-reductase, putative, expressed	AT5G58490.1	NAD(P)-binding Rossmann-fold superfamily protein
A.RT	Pavir.Ea03391.1.p|PACid:30231527	Pavir.Ea03391.1	5.791587305	2.533958803	0.022388	30231527	Pavir.Ea03391.1	LOC_Os01g62980.1	LTPL101 - Protease inhibitor/seed storage/LTP family protein precursor, expressed	AT5G05960.1	Bifunctional inhibitor/lipid-transfer protein/seed storage 2S albumin superfamily protein
A.RT	Pavir.Eb00652.1.p|PACid:30309445	Pavir.Eb00652.1	2.98945334	1.579881693	0.033887
A.RT	Pavir.Eb00769.1.p|PACid:30314162	Pavir.Eb00769.1	2.98261021	1.576575448	0.008572	30314162	Pavir.Eb00769.1	LOC_Os01g04370.1	hsp20/alpha crystallin family protein, putative, expressed	AT5G59720.1	heat shock protein 18.2
A.RT	Pavir.Eb00944.1.p|PACid:30309163	Pavir.Eb00944.1	3.023299177	1.596123751	0.008276	30309163	Pavir.Eb00944.1	LOC_Os01g15320.1	RALFL9 - Rapid ALkalinization Factor RALF family protein precursor, expressed	AT4G15800.1	ralf-like 33
A.RT	Pavir.Eb02048.1.p|PACid:30313661	Pavir.Eb02048.1	0.324934824	-1.621777725	0.001701	30313661	Pavir.Eb02048.1	LOC_Os01g42650.1	cytochrome c oxidase subunit 5B, mitochondrial precursor, putative, expressed	AT3G15640.1	Rubredoxin-like superfamily protein
A.RT	Pavir.Eb02512.1.p|PACid:30308767	Pavir.Eb02512.1	3.233897415	1.693273915	0.011316	30308767	Pavir.Eb02512.1	LOC_Os01g12580.1	late embryogenesis abundant protein, putative, expressed	AT1G01470.1	Late embryogenesis abundant protein
A.RT	Pavir.Eb02854.1.p|PACid:30311461	Pavir.Eb02854.1	3.32339936	1.732659666	0.003033	30311461	Pavir.Eb02854.1	LOC_Os01g49720.1	glutathione S-transferase, putative, expressed	AT1G10360.1	glutathione S-transferase TAU 18
A.RT	Pavir.Eb03276.1.p|PACid:30312971	Pavir.Eb03276.1	3.06662635	1.616652394	0.002858	30312971	Pavir.Eb03276.1	LOC_Os01g56150.1	OsProCP1 - Putative Lysosomal Pro-x Carboxypeptidase homologue, expressed	AT5G65760.1	Serine carboxypeptidase S28 family protein
A.RT	Pavir.Eb03806.1.p|PACid:30312699	Pavir.Eb03806.1	5.552057492	2.473022507	0.015309	30312699	Pavir.Eb03806.1	LOC_Os12g43490.1	thaumatin, putative, expressed	AT4G11650.1	osmotin 34
A.RT	Pavir.Eb03999.1.p|PACid:30313144	Pavir.Eb03999.1	3.27355681	1.710859016	0.001704	30313144	Pavir.Eb03999.1	LOC_Os01g73170.1	peroxidase precursor, putative, expressed	AT1G71695.1	Peroxidase superfamily protein
A.RT	Pavir.Fa00397.1.p|PACid:30185460	Pavir.Fa00397.1	0.366066871	-1.44982088	0.002026	30185460	Pavir.Fa00397.1	LOC_Os08g41390.2	peptidyl-prolyl isomerase, putative, expressed	AT3G25230.1	rotamase FKBP 1
A.RT	Pavir.Fa00915.1.p|PACid:30186533	Pavir.Fa00915.1	4.804191842	2.264293762	2.94e-05	30186533	Pavir.Fa00915.1	LOC_Os08g36320.3	decarboxylase, putative, expressed	AT5G17330.1	glutamate decarboxylase
A.RT	Pavir.Fa01008.1.p|PACid:30186143	Pavir.Fa01008.1	2.818024774	1.494684295	0.002456	30186143	Pavir.Fa01008.1	LOC_Os08g02230.1	FAD-binding and arabino-lactone oxidase domains containing protein, putative, expressed	AT2G46750.1	D-arabinono-1,4-lactone oxidase family protein
A.RT	Pavir.Fa01556.1.p|PACid:30187567	Pavir.Fa01556.1	5.785671553	2.532484425	0.0324	30187567	Pavir.Fa01556.1	LOC_Os08g02230.1	FAD-binding and arabino-lactone oxidase domains containing protein, putative, expressed	AT1G32300.1	D-arabinono-1,4-lactone oxidase family protein
A.RT	Pavir.Fa01601.1.p|PACid:30186390	Pavir.Fa01601.1	7.688456567	2.942694011	0.040287	30186390	Pavir.Fa01601.1	LOC_Os08g02230.1	FAD-binding and arabino-lactone oxidase domains containing protein, putative, expressed	AT2G46760.1	D-arabinono-1,4-lactone oxidase family protein
A.RT	Pavir.Fa01764.1.p|PACid:30187362	Pavir.Fa01764.1	3.00321824	1.586509317	0.006016	30187362	Pavir.Fa01764.1	LOC_Os08g12800.1	glucan endo-1,3-beta-glucosidase precursor, putative, expressed	AT5G58090.1	O-Glycosyl hydrolases family 17 protein
A.RT	Pavir.Fa02123.1.p|PACid:30186363	Pavir.Fa02123.1	2.633079651	1.396751164	0.00257	30186363	Pavir.Fa02123.1	LOC_Os08g09250.2	glyoxalase family protein, putative, expressed	AT1G11840.6	glyoxalase I homolog
A.RT	Pavir.Fb00271.1.p|PACid:30281008	Pavir.Fb00271.1	2.82127428	1.496346929	0.000148	30281008	Pavir.Fb00271.1	LOC_Os03g55010.1	UDP-glucoronosyl and UDP-glucosyl transferase domain containing protein, expressed	AT3G02100.1	UDP-Glycosyltransferase superfamily protein
A.RT	Pavir.Fb00477.1.p|PACid:30279639	Pavir.Fb00477.1	3.68847998	1.883026405	0.009702
A.RT	Pavir.Fb00620.1.p|PACid:30278273	Pavir.Fb00620.1	3.189387929	1.673279585	0.003017	30278273	Pavir.Fb00620.1	LOC_Os08g09250.2	glyoxalase family protein, putative, expressed	AT1G11840.6	glyoxalase I homolog
A.RT	Pavir.Fb00948.1.p|PACid:30279736	Pavir.Fb00948.1	21.59454183	4.432594802	0.018244	30279736	Pavir.Fb00948.1	LOC_Os06g23350.1	late embryogenesis abundant protein D-34, putative, expressed	AT3G22490.1	Seed maturation protein
A.RT	Pavir.Fb01262.1.p|PACid:30280025	Pavir.Fb01262.1	2.802794576	1.48686601	0.005454	30280025	Pavir.Fb01262.1	LOC_Os01g32780.1	universal stress protein domain containing protein, putative, expressed	AT1G68300.1	Adenine nucleotide alpha hydrolases-like superfamily protein
A.RT	Pavir.Fb01354.1.p|PACid:30279620	Pavir.Fb01354.1	3.531986396	1.820479786	0.003642	30279620	Pavir.Fb01354.1	LOC_Os03g12230.1	caleosin related protein, putative, expressed	AT2G33380.1	Caleosin-related family protein
A.RT	Pavir.Fb02055.1.p|PACid:30278309	Pavir.Fb02055.1	3.196533003	1.676507989	0.027087	30278309	Pavir.Fb02055.1	LOC_Os01g05610.1	Core histone H2A/H2B/H3/H4 domain containing protein, putative, expressed	AT5G59910.1	Histone superfamily protein
A.RT	Pavir.Fb02310.1.p|PACid:30278297	Pavir.Fb02310.1	0.2060418	-2.278991046	0.002647	30278297	Pavir.Fb02310.1	LOC_Os08g43580.1	acyl carrier protein, putative, expressed	AT1G54580.1	acyl carrier protein 2
A.RT	Pavir.Ga00596.1.p|PACid:30302580	Pavir.Ga00596.1	6.298702205	2.655054604	0.030584	30302580	Pavir.Ga00596.1	LOC_Os04g52110.1	late embryogenesis abundant protein, group 3, putative, expressed	AT5G44310.2	Late embryogenesis abundant protein (LEA) family protein
A.RT	Pavir.Ga01295.1.p|PACid:30303990	Pavir.Ga01295.1	11.60600019	3.536798952	0.016302	30303990	Pavir.Ga01295.1	LOC_Os04g43170.1	caleosin related protein, putative, expressed	AT4G26740.1	seed gene 1
A.RT	Pavir.Ga01599.1.p|PACid:30305090	Pavir.Ga01599.1	7.513476855	2.909480668	0.044556
A.RT	Pavir.Ga01678.1.p|PACid:30303654	Pavir.Ga01678.1	3.912044531	1.967922793	0.002291	30303654	Pavir.Ga01678.1	LOC_Os04g37490.1	oxidoreductase, aldo/keto reductase family protein, putative, expressed	AT1G59960.1	NAD(P)-linked oxidoreductase superfamily protein
A.RT	Pavir.Ga02610.1.p|PACid:30303668	Pavir.Ga02610.1	3.268530529	1.708642172	0.001539	30303668	Pavir.Ga02610.1	LOC_Os04g25560.1	OsSCP23 - Putative Serine Carboxypeptidase homologue, expressed	AT4G12910.1	serine carboxypeptidase-like 20
A.RT	Pavir.Gb00413.1.p|PACid:30223284	Pavir.Gb00413.1	3.019006848	1.594074029	0.012492	30223284	Pavir.Gb00413.1	LOC_Os04g53850.1	leucoanthocyanidin reductase, putative, expressed	AT1G61720.1	NAD(P)-binding Rossmann-fold superfamily protein
A.RT	Pavir.Gb00543.1.p|PACid:30223554	Pavir.Gb00543.1	10.75804265	3.427343708	0.039376	30223554	Pavir.Gb00543.1	LOC_Os04g52110.1	late embryogenesis abundant protein, group 3, putative, expressed	AT5G44310.2	Late embryogenesis abundant protein (LEA) family protein
A.RT	Pavir.Gb01434.1.p|PACid:30221789	Pavir.Gb01434.1	3.576529307	1.838560263	0.002508	30221789	Pavir.Gb01434.1	LOC_Os04g41620.1	CHIT2 - Chitinase family protein precursor, expressed	AT3G54420.1	homolog of carrot EP3-3 chitinase
A.RT	Pavir.Gb01551.1.p|PACid:30224863	Pavir.Gb01551.1	6.690232489	2.742056346	0.004746	30224863	Pavir.Gb01551.1	LOC_Os04g38390.1	wound/stress protein, putative, expressed	AT4G39730.1	Lipase/lipooxygenase, PLAT/LH2 family protein
A.RT	Pavir.Gb01868.1.p|PACid:30222408	Pavir.Gb01868.1	7.899918861	2.981837836	0.01183	30222408	Pavir.Gb01868.1	LOC_Os04g33920.1	LTPL102 - Protease inhibitor/seed storage/LTP family protein precursor, expressed	AT5G05960.1	Bifunctional inhibitor/lipid-transfer protein/seed storage 2S albumin superfamily protein
A.RT	Pavir.Gb02161.1.p|PACid:30221760	Pavir.Gb02161.1	9.880624208	3.304602187	0.004962	30221760	Pavir.Gb02161.1	LOC_Os01g71080.1	xylanase inhibitor, putative, expressed	AT1G03230.1	Eukaryotic aspartyl protease family protein
A.RT	Pavir.Gb02335.1.p|PACid:30223182	Pavir.Gb02335.1	2.780541953	1.475366105	0.000532	30223182	Pavir.Gb02335.1	LOC_Os04g19740.1	transketolase, chloroplast precursor, putative, expressed	AT2G45290.1	Transketolase
A.RT	Pavir.Ha01276.1.p|PACid:30316445	Pavir.Ha01276.1	3.259841853	1.704801975	0.000494	30316445	Pavir.Ha01276.1	LOC_Os11g20090.1	O-methyltransferase, putative, expressed	AT4G35150.1	O-methyltransferase family protein
A.RT	Pavir.Hb00971.1.p|PACid:30264344	Pavir.Hb00971.1	9.748807028	3.285225686	0.008189
A.RT	Pavir.Hb01571.1.p|PACid:30264315	Pavir.Hb01571.1	5.453200769	2.447103272	0.000897	30264315	Pavir.Hb01571.1	LOC_Os06g32550.1	THION14 - Plant thionin family protein precursor, putative, expressed	AT1G66100.1	Plant thionin
A.RT	Pavir.Ia00082.1.p|PACid:30209288	Pavir.Ia00082.1	0.126872439	-2.978549397	0.004497	30209288	Pavir.Ia00082.1	LOC_Os03g63930.1	acyl carrier protein, putative, expressed	AT5G27200.1	acyl carrier protein 5
A.RT	Pavir.Ia00797.1.p|PACid:30210919	Pavir.Ia00797.1	4.056081053	2.020086482	0.004688	30210919	Pavir.Ia00797.1	LOC_Os03g50160.1	plastocyanin-like domain containing protein, putative, expressed	AT2G02850.1	plantacyanin
A.RT	Pavir.Ia00911.1.p|PACid:30215736	Pavir.Ia00911.1	2.832116158	1.501880438	0.026516
A.RT	Pavir.Ia02294.1.p|PACid:30209464	Pavir.Ia02294.1	0.312788336	-1.676741381	0.003996	30209464	Pavir.Ia02294.1	LOC_Os06g23440.1	eukaryotic translation initiation factor 1A, putative, expressed	AT2G04520.1	Nucleic acid-binding, OB-fold-like protein
A.RT	Pavir.Ia02658.1.p|PACid:30211741	Pavir.Ia02658.1	2.604817605	1.381182355	0.037531
A.RT	Pavir.Ia02723.1.p|PACid:30214198	Pavir.Ia02723.1	3.041029011	1.604559579	0.000684	30214198	Pavir.Ia02723.1	LOC_Os10g18340.1	expressed protein	AT2G03440.1	nodulin-related protein 1
A.RT	Pavir.Ia02811.1.p|PACid:30212405	Pavir.Ia02811.1	4.408625957	2.140329079	0.001854	30212405	Pavir.Ia02811.1	LOC_Os10g02040.1	peroxidase precursor, putative, expressed	AT5G06720.1	peroxidase 2
A.RT	Pavir.Ia03162.1.p|PACid:30214069	Pavir.Ia03162.1	9.273194737	3.213066452	0.00655
A.RT	Pavir.Ia03296.1.p|PACid:30210796	Pavir.Ia03296.1	0.223617424	-2.160895492	0.020399	30210796	Pavir.Ia03296.1	LOC_Os03g25360.1	peroxidase precursor, putative, expressed	AT5G42180.1	Peroxidase superfamily protein
A.RT	Pavir.Ia03338.1.p|PACid:30213628	Pavir.Ia03338.1	4.220478893	2.077406709	0.000648
A.RT	Pavir.Ia03444.1.p|PACid:30214087	Pavir.Ia03444.1	2.921090322	1.546506968	0.000578	30214087	Pavir.Ia03444.1	LOC_Os03g21040.2	stress responsive protein, putative, expressed	AT2G39050.1	hydroxyproline-rich glycoprotein family protein
A.RT	Pavir.Ia03444.2.p|PACid:30214088	Pavir.Ia03444.2	2.704236527	1.435221343	0.000404	30214088	Pavir.Ia03444.2	LOC_Os03g21040.2	stress responsive protein, putative, expressed	AT2G39050.1	hydroxyproline-rich glycoprotein family protein
A.RT	Pavir.Ia03535.1.p|PACid:30211090	Pavir.Ia03535.1	9.935485321	3.312590441	0.004844	30211090	Pavir.Ia03535.1	LOC_Os03g19290.1	mitochondrial import inner membrane translocase subunit Tim17, putative, expressed	AT4G16160.2	Mitochondrial import inner membrane translocase subunit Tim17/Tim22/Tim23 family protein
A.RT	Pavir.Ia03665.1.p|PACid:30210947	Pavir.Ia03665.1	6.438586479	2.686743995	0.014066	30210947	Pavir.Ia03665.1	LOC_Os03g16920.1	DnaK family protein, putative, expressed	AT5G02500.1	heat shock cognate protein 70-1
A.RT	Pavir.Ia03678.1.p|PACid:30215378	Pavir.Ia03678.1	6.283855464	2.651649997	0.012071	30215378	Pavir.Ia03678.1	LOC_Os03g20680.1	late embryogenesis abundant protein 1, putative, expressed	AT3G53040.1	late embryogenesis abundant protein, putative / LEA protein, putative
A.RT	Pavir.Ia04404.1.p|PACid:30211920	Pavir.Ia04404.1	9.73003313	3.282444717	0.021822	30211920	Pavir.Ia04404.1	LOC_Os03g04080.1	expressed protein	AT5G42290.1	transcription activator-related
A.RT	Pavir.Ib00352.1.p|PACid:30239823	Pavir.Ib00352.1	2.835143784	1.503421903	0.012974	30239823	Pavir.Ib00352.1	LOC_Os03g04240.1	glutathione S-transferase, putative, expressed	AT2G47730.1	glutathione S-transferase phi 8
A.RT	Pavir.Ib00428.1.p|PACid:30242435	Pavir.Ib00428	20.67705841	4.369959052	0.025679
A.RT	Pavir.Ib01707.1.p|PACid:30243079	Pavir.Ib01707.1	2.839658368	1.505717373	0.001877	30243079	Pavir.Ib01707.1	LOC_Os04g55730.1	alpha-N-acetylglucosaminidase, putative, expressed	AT5G13690.1	alpha-N-acetylglucosaminidase family / NAGLU family
A.RT	Pavir.Ib02745.1.p|PACid:30240470	Pavir.Ib02745.1	3.015092872	1.592202441	0.021677
A.RT	Pavir.Ib02894.1.p|PACid:30237124	Pavir.Ib02894.1	2.679662641	1.422051382	0.003131	30237124	Pavir.Ib02894.1	LOC_Os10g09850.1	EF hand family protein, putative, expressed	AT4G38810.2	Calcium-binding EF-hand family protein
A.RT	Pavir.Ib03538.1.p|PACid:30238684	Pavir.Ib03538.1	0.347208614	-1.526125356	0.001037	30238684	Pavir.Ib03538.1	LOC_Os10g34540.1	tetratricopeptide repeat protein 1, putative, expressed	AT4G30480.2	Tetratricopeptide repeat (TPR)-like superfamily protein
A.RT	Pavir.Ib03633.1.p|PACid:30239106	Pavir.Ib03633.1	8.105338783	3.018872488	0.015635
A.RT	Pavir.Ib03654.1.p|PACid:30243014	Pavir.Ib03654.1	2.709422574	1.43798542	0.001912	30243014	Pavir.Ib03654.1	LOC_Os10g34920.1	secretory protein, putative, expressed	AT2G15220.1	Plant basic secretory protein (BSP) family protein
A.RT	Pavir.Ib03659.1.p|PACid:30242017	Pavir.Ib03659.1	4.389738872	2.134135122	0.00444	30242017	Pavir.Ib03659.1	LOC_Os10g35070.1	alpha-galactosidase precursor, putative, expressed	AT5G08380.1	alpha-galactosidase 1
A.RT	Pavir.Ib03696.1.p|PACid:30241723	Pavir.Ib03696.1	5.59182551	2.483319343	0.012734
A.RT	Pavir.Ib03775.1.p|PACid:30239410	Pavir.Ib03775.1	2.88009104	1.526114416	0.006331	30239410	Pavir.Ib03775.1	LOC_Os11g44810.1	auxin-repressed protein, putative, expressed	AT2G33830.2	Dormancy/auxin associated family protein
A.RT	Pavir.J00130.1.p|PACid:30200135	Pavir.J00130.1	3.954456099	1.983479278	0.016664	30200135	Pavir.J00130.1	LOC_Os04g26910.1	oxidoreductase, aldo/keto reductase family protein, putative, expressed	AT1G60730.1	NAD(P)-linked oxidoreductase superfamily protein
A.RT	Pavir.J00158.1.p|PACid:30282759	Pavir.J00158.1	21.56859081	4.430860016	0.003963	30282759	Pavir.J00158.1	LOC_Os05g46480.1	late embryogenesis abundant protein, group 3, putative, expressed	AT3G15670.1	Late embryogenesis abundant protein (LEA) family protein
A.RT	Pavir.J00406.1.p|PACid:30195439	Pavir.J00406.1	2.663296808	1.413213217	0.001287	30195439	Pavir.J00406.1	LOC_Os12g36240.1	inhibitor I family protein, putative, expressed	AT2G38870.1	Serine protease inhibitor, potato inhibitor I-type family protein
A.RT	Pavir.J00639.1.p|PACid:30255563	Pavir.J00639.1	3.938596488	1.97768162	0.013005	30255563	Pavir.J00639.1	LOC_Os05g36290.1	actin, putative, expressed	AT5G09810.1	actin 7
A.RT	Pavir.J00683.1.p|PACid:30255035	Pavir.J00683.1	6.553817365	2.71233547	0.016749	30255035	Pavir.J00683.1	LOC_Os01g62980.1	LTPL101 - Protease inhibitor/seed storage/LTP family protein precursor, expressed	AT5G05960.1	Bifunctional inhibitor/lipid-transfer protein/seed storage 2S albumin superfamily protein
A.RT	Pavir.J00892.1.p|PACid:30275043	Pavir.J00892.1	5.571953361	2.478183182	0.001331	30275043	Pavir.J00892.1	LOC_Os03g60580.1	actin-depolymerizing factor, putative, expressed	AT1G01750.1	actin depolymerizing factor 11
A.RT	Pavir.J00999.1.p|PACid:30308562	Pavir.J00999.1	11.58559566	3.534260315	0.036681	30308562	Pavir.J00999.1	LOC_Os03g20680.1	late embryogenesis abundant protein 1, putative, expressed	AT2G36640.1	embryonic cell protein 63
A.RT	Pavir.J01160.1.p|PACid:30306248	Pavir.J01160.1	7.615158348	2.928874036	0.008833	30306248	Pavir.J01160.1	LOC_Os03g58170.1	stem-specific protein TSJT1, putative, expressed	AT3G22850.1	Aluminium induced protein with YGL and LRDR motifs
A.RT	Pavir.J01199.1.p|PACid:30263609	Pavir.J01199.1	3.556884176	1.830613996	0.001265	30263609	Pavir.J01199.1	LOC_Os06g51084.1	1,4-alpha-glucan-branching enzyme, chloroplast precursor, putative, expressed	AT5G03650.1	starch branching enzyme 2.2
A.RT	Pavir.J01373.1.p|PACid:30219389	Pavir.J01373.1	0.262449073	-1.929890591	0.0067	30219389	Pavir.J01373.1	LOC_Os08g43580.1	acyl carrier protein, putative, expressed	AT1G54580.1	acyl carrier protein 2
A.RT	Pavir.J01866.1.p|PACid:30284124	Pavir.J01866.1	3.366465986	1.751234888	0.001539	30284124	Pavir.J01866.1	LOC_Os04g24430.1	sucrose synthase, putative, expressed	AT1G73370.1	sucrose synthase 6
A.RT	Pavir.J01936.1.p|PACid:30195714	Pavir.J01936.1	5.309882132	2.408679837	0.0002	30195714	Pavir.J01936.1	LOC_Os02g51710.1	wound/stress protein, putative, expressed	AT4G39730.1	Lipase/lipooxygenase, PLAT/LH2 family protein
A.RT	Pavir.J01963.1.p|PACid:30218288	Pavir.J01963.1	0.300080358	-1.736579206	0.000633	30218288	Pavir.J01963.1	LOC_Os09g31486.1	DnaK family protein, putative, expressed	AT5G09590.1	mitochondrial HSO70 2
A.RT	Pavir.J02207.1.p|PACid:30225449	Pavir.J02207.1	0.157054214	-2.670665442	0.004047	30225449	Pavir.J02207.1	LOC_Os05g33570.2	pyruvate, phosphate dikinase, chloroplast precursor, putative, expressed	AT4G15530.1	pyruvate orthophosphate dikinase
A.RT	Pavir.J02312.1.p|PACid:30294775	Pavir.J02312.1	8.15323942	3.02737338	0.001825	30294775	Pavir.J02312.1	LOC_Os05g39250.1	phosphatidylethanolamine-binding protein, putative, expressed	AT5G01300.1	PEBP (phosphatidylethanolamine-binding protein) family protein
A.RT	Pavir.J02395.1.p|PACid:30315736	Pavir.J02395.1	2.78143105	1.475827343	0.00545	30315736	Pavir.J02395.1	LOC_Os05g44340.1	heat shock protein 101, putative, expressed	AT1G74310.1	heat shock protein 101
A.RT	Pavir.J02529.1.p|PACid:30225526	Pavir.J02529.1	2.719853932	1.443529175	0.01815	30225526	Pavir.J02529.1	LOC_Os05g04870.1	oxidoreductase, short chain dehydrogenase/reductase family protein, putative, expressed	AT1G54870.1	NAD(P)-binding Rossmann-fold superfamily protein
A.RT	Pavir.J02614.1.p|PACid:30306905	Pavir.J02614.1	3.74317973	1.904264322	1.04e-05	30306905	Pavir.J02614.1	LOC_Os03g57200.1	glutathione S-transferase, putative, expressed	AT1G17180.1	glutathione S-transferase TAU 25
A.RT	Pavir.J03092.1.p|PACid:30216516	Pavir.J03092.1	2.719095905	1.443127038	0.044369	30216516	Pavir.J03092.1	LOC_Os05g38640.1	Core histone H2A/H2B/H3/H4 domain containing protein, putative, expressed	AT5G02560.1	histone H2A 12
A.RT	Pavir.J04109.1.p|PACid:30256957	Pavir.J04109.1	0.313150448	-1.675072154	0.004255	30256957	Pavir.J04109.1	LOC_Os08g43580.1	acyl carrier protein, putative, expressed	AT1G54580.1	acyl carrier protein 2
A.RT	Pavir.J06494.1.p|PACid:30286195	Pavir.J06494.1	4.154338909	2.054618915	0.003886	30286195	Pavir.J06494.1	LOC_Os03g41060.1	GASR2 - Gibberellin-regulated GASA/GAST/Snakin family protein precursor, putative, expressed	AT2G14900.1	Gibberellin-regulated family protein
A.RT	Pavir.J06780.1.p|PACid:30220067	Pavir.J06780.1	0.262657399	-1.92874587	0.004358	30220067	Pavir.J06780.1	LOC_Os01g67010.1	expressed protein	AT3G07570.1	Cytochrome b561/ferric reductase transmembrane with DOMON related domain
A.RT	Pavir.J07576.1.p|PACid:30308383	Pavir.J07576.1	2.707749809	1.437094443	0.002712	30308383	Pavir.J07576.1	LOC_Os06g45710.1	phosphoglycerate kinase protein, putative, expressed	AT1G79550.1	phosphoglycerate kinase
A.RT	Pavir.J08185.1.p|PACid:30185137	Pavir.J08185.1	5.394046097	2.431367851	0.002123	30185137	Pavir.J08185.1	LOC_Os01g19770.1	mitochondrial import inner membrane translocase subunit Tim17, putative, expressed	AT4G16160.2	Mitochondrial import inner membrane translocase subunit Tim17/Tim22/Tim23 family protein
A.RT	Pavir.J08343.1.p|PACid:30273449	Pavir.J08343.1	2.820841538	1.496125624	0.026781	30273449	Pavir.J08343.1	LOC_Os05g06780.1	LTPL104 - Protease inhibitor/seed storage/LTP family protein precursor, expressed	AT5G05960.1	Bifunctional inhibitor/lipid-transfer protein/seed storage 2S albumin superfamily protein
A.RT	Pavir.J08753.1.p|PACid:30217806	Pavir.J08753.1	0.320426302	-1.64193552	0.006919
A.RT	Pavir.J08895.1.p|PACid:30257540	Pavir.J08895.1	3.238212389	1.695197613	0.020185	30257540	Pavir.J08895.1	LOC_Os12g12560.1	NADP-dependent oxidoreductase, putative, expressed	AT3G03080.1	Zinc-binding dehydrogenase family protein
A.RT	Pavir.J09198.1.p|PACid:30218083	Pavir.J09198.1	2.637614871	1.399233926	0.001958	30218083	Pavir.J09198.1	LOC_Os05g50380.1	glucose-1-phosphate adenylyltransferase large subunit, chloroplast precursor, putative, expressed	AT1G27680.1	ADPGLC-PPase large subunit
A.RT	Pavir.J09458.1.p|PACid:30231778	Pavir.J09458.1	7.553137447	2.91707604	0.022181	30231778	Pavir.J09458.1	LOC_Os04g41680.1	CHIT3 - Chitinase family protein precursor, expressed	AT3G54420.1	homolog of carrot EP3-3 chitinase
A.RT	Pavir.J09661.1.p|PACid:30284642	Pavir.J09661.1	2.667969662	1.415742262	0.007537
A.RT	Pavir.J09784.1.p|PACid:30274978	Pavir.J09784.1	5.48951294	2.456678151	0.006069
A.RT	Pavir.J10323.1.p|PACid:30190884	Pavir.J10323.1	0.375191835	-1.414299663	0.00405	30190884	Pavir.J10323.1	LOC_Os01g39860.1	1-aminocyclopropane-1-carboxylate oxidase protein, putative, expressed	AT2G19590.1	ACC oxidase 1
A.RT	Pavir.J11658.1.p|PACid:30207612	Pavir.J11658.1	6.829730225	2.771828593	0.001956	30207612	Pavir.J11658.1	LOC_Os03g19290.1	mitochondrial import inner membrane translocase subunit Tim17, putative, expressed	AT4G16160.2	Mitochondrial import inner membrane translocase subunit Tim17/Tim22/Tim23 family protein
A.RT	Pavir.J13364.1.p|PACid:30256564	Pavir.J13364.1	3.786383385	1.920820497	0.032716
A.RT	Pavir.J14586.1.p|PACid:30254928	Pavir.J14586.1	2.647931055	1.404865559	0.006862	30254928	Pavir.J14586.1	LOC_Os02g02400.1	catalase isozyme A, putative, expressed	AT1G20630.1	catalase 1
A.RT	Pavir.J15194.1.p|PACid:30216067	Pavir.J15194.1	2.890549284	1.531343671	0.004121	30216067	Pavir.J15194.1	LOC_Os01g40550.1	hsp20/alpha crystallin family protein, putative, expressed	AT3G10680.1	HSP20-like chaperones superfamily protein
A.RT	Pavir.J15479.1.p|PACid:30208673	Pavir.J15479.1	5.693655313	2.509355157	0.007619	30208673	Pavir.J15479.1	LOC_Os09g30240.1	phosphofructokinase, putative, expressed	AT5G47810.1	phosphofructokinase 2
A.RT	Pavir.J15786.1.p|PACid:30195529	Pavir.J15786.1	5.23677502	2.388678626	4.03e-06	30195529	Pavir.J15786.1	LOC_Os01g73220.1	peroxidase precursor, putative, expressed	AT1G71695.1	Peroxidase superfamily protein
A.RT	Pavir.J15793.1.p|PACid:30248019	Pavir.J15793.1	2.60871783	1.383340904	0.015703	30248019	Pavir.J15793.1	LOC_Os12g02980.2	nucleoside-triphosphatase, putative, expressed	AT5G18280.1	apyrase 2
A.RT	Pavir.J15849.1.p|PACid:30199049	Pavir.J15849.1	0.219160925	-2.189937495	0.0028	30199049	Pavir.J15849.1	LOC_Os05g33570.2	pyruvate, phosphate dikinase, chloroplast precursor, putative, expressed	AT4G15530.5	pyruvate orthophosphate dikinase
A.RT	Pavir.J15860.1.p|PACid:30275456	Pavir.J15860.1	6.843297956	2.774691763	0.006326	30275456	Pavir.J15860.1	LOC_Os05g39690.1	oxidoreductase, aldo/keto reductase family protein, putative, expressed	AT2G37770.2	NAD(P)-linked oxidoreductase superfamily protein
A.RT	Pavir.J16347.1.p|PACid:30307684	Pavir.J16347.1	7.798221448	2.963145124	0.00091	30307684	Pavir.J16347.1	LOC_Os03g60580.1	actin-depolymerizing factor, putative, expressed	AT1G01750.1	actin depolymerizing factor 11
A.RT	Pavir.J16725.1.p|PACid:30287593	Pavir.J16725.1	2.740050715	1.454202596	0.000438	30287593	Pavir.J16725.1	LOC_Os02g14090.1	berberine and berberine like domain containing protein, expressed	AT5G44410.1	FAD-binding Berberine family protein
A.RT	Pavir.J16816.1.p|PACid:30301779	Pavir.J16816.1	0.379412526	-1.398160787	0.004235	30301779	Pavir.J16816.1	LOC_Os05g49150.1	eukaryotic translation initiation factor 3 subunit D, putative, expressed	AT4G20980.1	Eukaryotic translation initiation factor 3 subunit 7 (eIF-3)
A.RT	Pavir.J17463.1.p|PACid:30282282	Pavir.J17463.1	10.34539922	3.370917414	0.02056	30282282	Pavir.J17463.1	LOC_Os04g41680.1	CHIT3 - Chitinase family protein precursor, expressed	AT3G54420.1	homolog of carrot EP3-3 chitinase
A.RT	Pavir.J17471.1.p|PACid:30294892	Pavir.J17471.1	4.06445507	2.02306194	0.001476	30294892	Pavir.J17471.1	LOC_Os08g08970.1	Cupin domain containing protein, expressed	AT5G39110.1	RmlC-like cupins superfamily protein
A.RT	Pavir.J18613.1.p|PACid:30247167	Pavir.J18613.1	5.867162128	2.552662859	0.002212
A.RT	Pavir.J18834.1.p|PACid:30275849	Pavir.J18834.1	6.087912289	2.605947574	0.003256
A.RT	Pavir.J19600.1.p|PACid:30274742	Pavir.J19600.1	2.634032829	1.397273326	0.034631	30274742	Pavir.J19600.1	LOC_Os06g23350.1	late embryogenesis abundant protein D-34, putative, expressed	AT3G22490.1	Seed maturation protein
A.RT	Pavir.J19751.1.p|PACid:30274240	Pavir.J19751.1	2.816346099	1.493824637	0.00501	30274240	Pavir.J19751.1	LOC_Os11g44810.1	auxin-repressed protein, putative, expressed	AT1G28330.1	dormancy-associated protein-like 1
A.RT	Pavir.J20535.1.p|PACid:30301723	Pavir.J20535.1	0.3232189	-1.629416533	0.013401
A.RT	Pavir.J20981.1.p|PACid:30246326	Pavir.J20981.1	20.2521214	4.340001133	0.002714
A.RT	Pavir.J21027.1.p|PACid:30247869	Pavir.J21027.1	2.830544641	1.501079677	0.008254
A.RT	Pavir.J21349.1.p|PACid:30225604	Pavir.J21349.1	3.387859381	1.760373994	0.003165	30225604	Pavir.J21349.1	LOC_Os02g54140.1	hsp20/alpha crystallin family protein, putative, expressed	AT1G54050.1	HSP20-like chaperones superfamily protein
A.RT	Pavir.J24327.1.p|PACid:30256877	Pavir.J24327.1	6.173800476	2.626158859	0.001857	30256877	Pavir.J24327.1	LOC_Os10g38740.1	glutathione S-transferase, putative, expressed	AT1G10370.1	Glutathione S-transferase family protein
A.RT	Pavir.J24821.1.p|PACid:30277014	Pavir.J24821.1	7.427842594	2.892943243	0.00127	30277014	Pavir.J24821.1	LOC_Os01g50910.1	late embryogenesis abundant protein, group 3, putative, expressed	AT1G52690.1	Late embryogenesis abundant protein (LEA) family protein
A.RT	Pavir.J25726.1.p|PACid:30194791	Pavir.J25726.1	5.765956758	2.527560017	0.000989
A.RT	Pavir.J25812.1.p|PACid:30220787	Pavir.J25812.1	2.615037077	1.386831401	0.002376	30220787	Pavir.J25812.1	LOC_Os05g38230.2	oxidoreductase, aldo/keto reductase family protein, putative, expressed	AT2G37770.2	NAD(P)-linked oxidoreductase superfamily protein
A.RT	Pavir.J28355.1.p|PACid:30287092	Pavir.J28355.1	0.347925447	-1.523149893	0.000825	30287092	Pavir.J28355.1	LOC_Os11g43900.1	translationally-controlled tumor protein, putative, expressed	AT3G05540.1	Methionine sulfoxide reductase (MSS4-like) family protein
A.RT	Pavir.J28600.1.p|PACid:30202435	Pavir.J28600.1	8.292499171	3.051806963	0.03718	30202435	Pavir.J28600.1	LOC_Os03g07180.1	embryonic protein DC-8, putative, expressed	AT4G36600.1	Late embryogenesis abundant (LEA) protein
A.RT	Pavir.J28620.1.p|PACid:30314458	Pavir.J28620.1	2.636616298	1.398687634	0.002542	30314458	Pavir.J28620.1	LOC_Os06g25010.1	glycosyl hydrolase, putative, expressed	AT5G24090.1	chitinase A
A.RT	Pavir.J29111.1.p|PACid:30244668	Pavir.J29111.1	0.29833899	-1.74497556	0.004375	30244668	Pavir.J29111.1	LOC_Os04g50204.1	protein transport protein-related, putative, expressed	AT5G16730.1	Plant protein of unknown function (DUF827)
A.RT	Pavir.J29127.1.p|PACid:30284872	Pavir.J29127.1	3.844608806	1.94283681	0.002948
A.RT	Pavir.J29514.1.p|PACid:30196199	Pavir.J29514.1	2.807847904	1.48946479	0.000346	30196199	Pavir.J29514.1	LOC_Os02g12610.1	hsp20/alpha crystallin family protein, putative, expressed	AT5G12030.1	heat shock protein 17.6A
A.RT	Pavir.J31186.1.p|PACid:30216617	Pavir.J31186.1	2.971309636	1.571098954	0.048158	30216617	Pavir.J31186.1	LOC_Os11g37950.1	WIP3 - Wound-induced protein precursor, expressed	AT3G04720.1	pathogenesis-related 4
A.RT	Pavir.J31919.1.p|PACid:30199244	Pavir.J31919.1	4.678437384	2.226026745	0.025853	30199244	Pavir.J31919.1	LOC_Os10g36180.1	expressed protein	AT5G52300.2	CAP160 protein
A.RT	Pavir.J34564.1.p|PACid:30263851	Pavir.J34564.1	6.848431809	2.77577367	0.00364	30263851	Pavir.J34564.1	LOC_Os04g09390.1	HEV3 - Hevein family protein precursor, expressed	AT3G12500.1	basic chitinase
A.RT	Pavir.J34655.1.p|PACid:30270543	Pavir.J34655.1	2.676314853	1.420247851	0.03315	30270543	Pavir.J34655.1	LOC_Os01g62870.1	oxidoreductase, aldo/keto reductase family protein, putative, expressed	AT2G37770.2	NAD(P)-linked oxidoreductase superfamily protein
A.RT	Pavir.J34849.1.p|PACid:30255001	Pavir.J34849.1	4.311523311	2.10819768	0.044176	30255001	Pavir.J34849.1	LOC_Os11g37970.1	WIP5 - Wound-induced protein precursor, expressed	AT3G04720.1	pathogenesis-related 4
A.RT	Pavir.J36542.1.p|PACid:30207798	Pavir.J36542.1	3.383989463	1.758725076	0.005425	30207798	Pavir.J36542.1	LOC_Os01g71080.1	xylanase inhibitor, putative, expressed	AT1G03230.1	Eukaryotic aspartyl protease family protein
A.RT	Pavir.J38252.1.p|PACid:30191144	Pavir.J38252.1	5.006157963	2.323703814	0.011655	30191144	Pavir.J38252.1	LOC_Os01g58194.1	protein disulfide isomerase, putative, expressed	AT1G60420.1	DC1 domain-containing protein
A.RT	Pavir.J40233.1.p|PACid:30244149	Pavir.J40233.1	3.232213153	1.692522342	0.00393
B.E	Pavir.Aa01510.1.p|PACid:30250971	Pavir.Aa01510.1	2.49711571	1.457672676	0.027494	30250971	Pavir.Aa01510.1	LOC_Os11g32610.1	chalcone and stilbene synthases, putative, expressed	AT5G13930.1	Chalcone and stilbene synthase family protein
B.E	Pavir.Aa02064.1.p|PACid:30250661	Pavir.Aa02064.1	0.35731533	-1.3473203	0.010427	30250661	Pavir.Aa02064.1	LOC_Os02g30050.1	ribosomal protein L29, putative, expressed	AT5G02610.1	Ribosomal L29 family protein
B.E	Pavir.Aa02190.1.p|PACid:30253554	Pavir.Aa02190.1	3.73170659	2.037245557	0.004038	30253554	Pavir.Aa02190.1	LOC_Os10g17790.1	remorin C-terminal domain containing protein, putative, expressed	AT1G13920.1	Remorin family protein
B.E	Pavir.Aa02730.1.p|PACid:30249193	Pavir.Aa02730.1	0.37752064	-1.267962575	0.004187	30249193	Pavir.Aa02730.1	LOC_Os02g15594.1	protein phosphatase 2C, putative, expressed	AT5G53140.1	Protein phosphatase 2C family protein
B.E	Pavir.Ab01039.1.p|PACid:30236445	Pavir.Ab01039.1	3.57790957	1.976526923	5.36e-06	30236445	Pavir.Ab01039.1	LOC_Os02g15640.1	CAPIP1, putative, expressed	AT5G53160.2	regulatory components of ABA receptor 3
B.E	Pavir.Ab01160.1.p|PACid:30232047	Pavir.Ab01160.1	0.2466761	-1.881900133	0.00959	30232047	Pavir.Ab01160.1	LOC_Os04g57320.1	immutans protein, putative, expressed	AT3G27620.1	alternative oxidase 1C
B.E	Pavir.Ab02510.2.p|PACid:30236288	Pavir.Ab02510.2	2.89947357	1.67320099	0.009861	30236288	Pavir.Ab02510.2	LOC_Os02g40514.1	h/ACA ribonucleoprotein complex subunit 3, putative, expressed	AT2G20490.1	nucleolar RNA-binding Nop10p family protein
B.E	Pavir.Ab03111.1.p|PACid:30232423	Pavir.Ab03111.1	0.36965937	-1.298321626	0.010054	30232423	Pavir.Ab03111.1	LOC_Os07g23120.1	expressed protein	AT1G64980.1	Nucleotide-diphospho-sugar transferases superfamily protein
B.E	Pavir.Ba01232.1.p|PACid:30291469	Pavir.Ba01232.1	0.3883508	-1.227157665	0.001899	30291469	Pavir.Ba01232.1	LOC_Os09g36350.1	endoglucanase, putative, expressed	AT1G75680.1	glycosyl hydrolase 9B7
B.E	Pavir.Ba02832.1.p|PACid:30289265	Pavir.Ba02832.1	2.5209088	1.471353926	0.017629
B.E	Pavir.Ba02990.1.p|PACid:30292689	Pavir.Ba02990.1	2.26407048	1.316328869	0.019228	30292689	Pavir.Ba02990.1	LOC_Os01g48280.1	ubiquitin-conjugating enzyme, putative, expressed	AT1G16890.2	ubiquitin-conjugating enzyme 36
B.E	Pavir.Ba03742.1.p|PACid:30293352	Pavir.Ba03742.1	0.3271259	-1.474672119	0.00198	30293352	Pavir.Ba03742.1	LOC_Os05g19370.1	60S ribosomal protein L15, putative, expressed	AT4G16720.1	Ribosomal protein L23/L15e family protein
B.E	Pavir.Ba03810.1.p|PACid:30293631	Pavir.Ba03810.1	0.37899547	-1.262337502	0.001192	30293631	Pavir.Ba03810.1	LOC_Os11g03650.1	mla1, putative, expressed	AT1G50180.1	NB-ARC domain-containing disease resistance protein
B.E	Pavir.Bb01340.1.p|PACid:30298714	Pavir.Bb01340.1	0.36696989	-1.308856415	0.002658	30298714	Pavir.Bb01340.1	LOC_Os09g16030.1	cytokinin-O-glucosyltransferase 1, putative, expressed	AT2G16890.2	UDP-Glycosyltransferase superfamily protein
B.E	Pavir.Bb01837.1.p|PACid:30298804	Pavir.Bb01837.1	0.38540638	-1.238137636	0.000689	30298804	Pavir.Bb01837.1	LOC_Os07g33997.1	60S ribosomal protein L44, putative, expressed	AT4G14320.1	Zinc-binding ribosomal protein family protein
B.E	Pavir.Bb03734.1.p|PACid:30301206	Pavir.Bb03734.1	2.79846834	1.622047428	0.002527	30301206	Pavir.Bb03734.1	LOC_Os07g48500.1	stress responsive protein, putative, expressed	AT2G39050.1	hydroxyproline-rich glycoprotein family protein
B.E	Pavir.Ca00561.1.p|PACid:30204121	Pavir.Ca00561.1	0.31395527	-1.533959058	0.000723	30204121	Pavir.Ca00561.1	LOC_Os06g11210.1	12-oxophytodienoate reductase, putative, expressed	AT1G76680.1	12-oxophytodienoate reductase 1
B.E	Pavir.Ca02100.1.p|PACid:30204177	Pavir.Ca02100.1	2.21765428	1.286444472	0.002457	30204177	Pavir.Ca02100.1	LOC_Os05g23880.1	lipoxygenase, putative, expressed	AT3G22400.1	PLAT/LH2 domain-containing lipoxygenase family protein
B.E	Pavir.Ca02312.1.p|PACid:30204578	Pavir.Ca02312.1	0.1996341	-2.187159937	0.013231	30204578	Pavir.Ca02312.1	LOC_Os10g04270.1	jacalin-like lectin domain containing protein, expressed	AT1G19715.3	Mannose-binding lectin superfamily protein
B.E	Pavir.Ca02594.1.p|PACid:30207111	Pavir.Ca02594.1	2.24455505	1.303839479	0.007534
B.E	Pavir.Cb00406.1.p|PACid:30268440	Pavir.Cb00406.1	2.84151902	1.644072373	0.000416
B.E	Pavir.Da00120.1.p|PACid:30194276	Pavir.Da00120.1	0.33337625	-1.447366755	0.000251	30194276	Pavir.Da00120.1	LOC_Os04g57440.1	oryzain beta chain precursor, putative, expressed	AT5G43060.1	Granulin repeat cysteine protease family protein
B.E	Pavir.Da00532.1.p|PACid:30192104	Pavir.Da00532.1	0.23116346	-1.975604739	0.001862	30192104	Pavir.Da00532.1	LOC_Os06g07580.1	expressed protein	AT4G29390.1	Ribosomal protein S30 family protein
B.E	Pavir.Da01421.1.p|PACid:30193516	Pavir.Da01421.1	0.36994665	-1.297200862	0.001141	30193516	Pavir.Da01421.1	LOC_Os06g11290.1	12-oxophytodienoate reductase, putative, expressed	AT1G76690.1	12-oxophytodienoate reductase 2
B.E	Pavir.Db00671.1.p|PACid:30260052	Pavir.Db00671.1	3.11409646	1.776223635	0.029138	30260052	Pavir.Db00671.1	LOC_Os12g01530.2	ferritin-1, chloroplast precursor, putative, expressed	AT2G40300.1	ferritin 4
B.E	Pavir.Db01633.1.p|PACid:30260003	Pavir.Db01633.1	0.34526887	-1.396797813	0.000716	30260003	Pavir.Db01633.1	LOC_Os06g16350.1	peroxidase precursor, putative, expressed	AT1G68850.1	Peroxidase superfamily protein
B.E	Pavir.Ea03639.1.p|PACid:30227669	Pavir.Ea03639.1	0.37391005	-1.281826833	0.001581	30227669	Pavir.Ea03639.1	LOC_Os01g65880.1	nodulin MtN3 family protein, putative, expressed	AT1G21460.1	Nodulin MtN3 family protein
B.E	Pavir.Eb01816.1.p|PACid:30309864	Pavir.Eb01816.1	2.31559962	1.348795827	0.014546
B.E	Pavir.Eb02623.1.p|PACid:30308849	Pavir.Eb02623.1	0.37340514	-1.283776305	0.002842	30308849	Pavir.Eb02623.1	LOC_Os01g51540.1	cytidine/deoxycytidylate deaminase, putative, expressed	AT2G19570.1	cytidine deaminase 1
B.E	Pavir.Eb03677.1.p|PACid:30313434	Pavir.Eb03677.1	0.375449	-1.275901128	0.005102	30313434	Pavir.Eb03677.1	LOC_Os01g62420.1	triosephosphate isomerase, cytosolic, putative, expressed	AT3G55440.1	triosephosphate isomerase
B.E	Pavir.Eb03907.1.p|PACid:30314214	Pavir.Eb03907.1	0.3788653	-1.262833088	9.07e-05	30314214	Pavir.Eb03907.1	LOC_Os01g71280.1	glycerol-3-phosphate dehydrogenase, putative, expressed	AT2G41540.1	6-phosphogluconate dehydrogenase family protein
B.E	Pavir.Fa00353.1.p|PACid:30186997	Pavir.Fa00353.1	0.34713196	-1.38903388	0.002306	30186997	Pavir.Fa00353.1	LOC_Os08g38900.1	caffeoyl-CoA O-methyltransferase, putative, expressed	AT4G34050.1	S-adenosyl-L-methionine-dependent methyltransferases superfamily protein
B.E	Pavir.Fa02199.1.p|PACid:30185615	Pavir.Fa02199.1	0.36339708	-1.322971286	0.00039	30185615	Pavir.Fa02199.1	LOC_Os08g02120.1	kinase, pfkB family, putative, expressed	AT4G10260.1	pfkB-like carbohydrate kinase family protein
B.E	Pavir.Fb00095.1.p|PACid:30279969	Pavir.Fb00095.1	0.29135483	-1.641740871	0.000672	30279969	Pavir.Fb00095.1	LOC_Os08g01520.1	cytochrome P450, putative, expressed	AT1G13080.1	cytochrome P450, family 71, subfamily B, polypeptide 2
B.E	Pavir.Fb00096.1.p|PACid:30280545	Pavir.Fb00096.1	3.04077875	1.74185085	0.000722	30280545	Pavir.Fb00096.1	LOC_Os08g01520.1	cytochrome P450, putative, expressed	AT4G13290.1	cytochrome P450, family 71, subfamily A, polypeptide 19
B.E	Pavir.Fb00369.1.p|PACid:30279631	Pavir.Fb00369.1	2.19962099	1.274664956	0.011242	30279631	Pavir.Fb00369.1	LOC_Os08g05570.3	monodehydroascorbate reductase, putative, expressed	AT1G63940.2	monodehydroascorbate reductase 6
B.E	Pavir.Ga00253.1.p|PACid:30303504	Pavir.Ga00253.1	2.22572514	1.291685442	0.003195	30303504	Pavir.Ga00253.1	LOC_Os04g59370.1	thaumatin, putative, expressed	AT1G77700.1	Pathogenesis-related thaumatin superfamily protein
B.E	Pavir.Ga00581.1.p|PACid:30303618	Pavir.Ga00581.1	0.38536577	-1.238289681	0.003624	30303618	Pavir.Ga00581.1	LOC_Os03g25670.1	expressed protein	AT3G50710.1	F-box/RNI-like/FBD-like domains-containing protein
B.E	Pavir.Ga01503.1.p|PACid:30304457	Pavir.Ga01503.1	2.13250397	1.22995843	0.027959	30304457	Pavir.Ga01503.1	LOC_Os04g41830.1	myb-like DNA-binding domain containing protein, expressed	AT3G07565.3	Protein of unknown function (DUF3755)
B.E	Pavir.Ga01812.1.p|PACid:30303684	Pavir.Ga01812.1	0.38295888	-1.247328607	0.008684	30303684	Pavir.Ga01812.1	LOC_Os04g35240.1	CAMK_CAMK_like.25 - CAMK includes calcium/calmodulin depedent protein kinases, expressed	AT1G10940.1	Protein kinase superfamily protein
B.E	Pavir.Gb00236.1.p|PACid:30221953	Pavir.Gb00236.1	0.28986718	-1.649126112	0.000354	30221953	Pavir.Gb00236.1	LOC_Os04g58390.1	allantoinase, putative, expressed	AT4G04955.1	allantoinase
B.E	Pavir.Gb00789.1.p|PACid:30223210	Pavir.Gb00789.1	0.27419571	-1.729312084	0.001987	30223210	Pavir.Gb00789.1	LOC_Os04g57320.1	immutans protein, putative, expressed	AT3G22370.1	alternative oxidase 1A
B.E	Pavir.Gb00881.1.p|PACid:30223986	Pavir.Gb00881.1	2.29413122	1.335357916	0.043267	30223986	Pavir.Gb00881.1	LOC_Os04g47690.3	HMG1/2, putative, expressed	AT1G20696.1	high mobility group B3
B.E	Pavir.Ha00222.1.p|PACid:30318340	Pavir.Ha00222.1	0.3806233	-1.256154213	0.009659	30318340	Pavir.Ha00222.1	LOC_Os11g43900.1	translationally-controlled tumor protein, putative, expressed	AT3G05540.1	Methionine sulfoxide reductase (MSS4-like) family protein
B.E	Pavir.Ha00643.1.p|PACid:30317063	Pavir.Ha00643.1	0.3876577	-1.229734756	0.001997	30317063	Pavir.Ha00643.1	LOC_Os11g31090.1	transferase family protein, putative, expressed	AT5G41040.1	HXXXD-type acyl-transferase family protein
B.E	Pavir.Ha00651.1.p|PACid:30318301	Pavir.Ha00651.1	2.27299812	1.322006491	0.019762
B.E	Pavir.Ha01437.1.p|PACid:30317827	Pavir.Ha01437.1	2.26434231	1.316502072	0.000106
B.E	Pavir.Ha01689.1.p|PACid:30318367	Pavir.Ha01689.1	0.35436704	-1.359273662	0.008802
B.E	Pavir.Ha01691.1.p|PACid:30317850	Pavir.Ha01691.1	0.3694207	-1.299253379	0.007057
B.E	Pavir.Hb01412.1.p|PACid:30266803	Pavir.Hb01412.1	2.12966347	1.228035473	0.045661	30266803	Pavir.Hb01412.1	LOC_Os11g47580.1	glycosyl hydrolase, putative, expressed	AT5G24090.1	chitinase A
B.E	Pavir.Hb01772.1.p|PACid:30264897	Pavir.Hb01772.1	2.20433235	1.277751759	0.041431	30264897	Pavir.Hb01772.1	LOC_Os03g46070.1	thaumatin, putative, expressed	AT4G11650.1	osmotin 34
B.E	Pavir.Ia00185.1.p|PACid:30212273	Pavir.Ia00185.1	0.37484776	-1.278213324	0.004042	30212273	Pavir.Ia00185.1	LOC_Os03g60509.2	expressed protein	AT3G55120.1	Chalcone-flavanone isomerase family protein
B.E	Pavir.Ia00392.1.p|PACid:30212877	Pavir.Ia00392.1	2.63221177	1.533685562	0.003458	30212877	Pavir.Ia00392.1	LOC_Os03g55090.1	alpha-glucan phosphorylast isozyme, putative, expressed	AT3G29320.1	Glycosyl transferase, family 35
B.E	Pavir.Ia00849.1.p|PACid:30213251	Pavir.Ia00849.1	2.2243706	1.290807174	0.00382	30213251	Pavir.Ia00849.1	LOC_Os03g50220.1	homologous-pairing protein meu13, putative, expressed	AT1G13330.1	Arabidopsis Hop2 homolog
B.E	Pavir.Ia00883.1.p|PACid:30213617	Pavir.Ia00883.1	0.38546496	-1.237918377	0.002132	30213617	Pavir.Ia00883.1	LOC_Os03g50560.1	RNA recognition motif containing protein, putative, expressed	AT4G17720.1	RNA-binding (RRM/RBD/RNP motifs) family protein
B.E	Pavir.Ia02784.1.p|PACid:30215793	Pavir.Ia02784.1	0.37573247	-1.274812303	0.002064	30215793	Pavir.Ia02784.1	LOC_Os03g22020.1	peroxidase precursor, putative, expressed	AT5G05340.1	Peroxidase superfamily protein
B.E	Pavir.Ia03635.1.p|PACid:30211680	Pavir.Ia03635.1	0.37344758	-1.283612334	0.00298	30211680	Pavir.Ia03635.1	LOC_Os03g17350.1	white-brown complex homolog protein, putative, expressed	AT3G55090.1	ABC-2 type transporter family protein
B.E	Pavir.Ia04699.1.p|PACid:30213202	Pavir.Ia04699.1	2.16691272	1.253051047	0.019722	30213202	Pavir.Ia04699.1	LOC_Os03g11910.1	DnaK family protein, putative, expressed	AT2G32120.1	heat-shock protein 70T-2
B.E	Pavir.Ib00918.1.p|PACid:30239390	Pavir.Ib00918.1	2.96604923	1.705952544	0.002702	30239390	Pavir.Ib00918.1	LOC_Os02g20940.1	CHCH domain containing protein, expressed	AT1G69750.1	cytochrome c oxidase 19-2
B.E	Pavir.Ib01545.1.p|PACid:30240433	Pavir.Ib01545.1	0.33058846	-1.459481711	0.035567	30240433	Pavir.Ib01545.1	LOC_Os03g21380.1	OsCML27 - Calmodulin-related calcium sensor protein, expressed	AT5G44460.1	calmodulin like 43
B.E	Pavir.Ib01813.1.p|PACid:30239425	Pavir.Ib01813.1	0.35561177	-1.354215031	0.007776	30239425	Pavir.Ib01813.1	LOC_Os03g28330.1	sucrose synthase, putative, expressed	AT3G43190.1	sucrose synthase 4
B.E	Pavir.Ib02048.1.p|PACid:30240916	Pavir.Ib02048.1	0.37431563	-1.280262797	0.001741	30240916	Pavir.Ib02048.1	LOC_Os03g30250.1	COBRA-like protein precursor, putative, expressed	AT5G15630.1	COBRA-like extracellular glycosyl-phosphatidyl inositol-anchored protein family
B.E	Pavir.Ib02558.1.p|PACid:30239510	Pavir.Ib02558.1	0.31382468	-1.534559276	0.006539	30239510	Pavir.Ib02558.1	LOC_Os03g22020.1	peroxidase precursor, putative, expressed	AT5G05340.1	Peroxidase superfamily protein
B.E	Pavir.Ib03057.1.p|PACid:30239224	Pavir.Ib03057.1	0.37913631	-1.261801446	0.0038	30239224	Pavir.Ib03057.1	LOC_Os01g32800.2	proteasome subunit, putative, expressed	AT4G19006.1	Proteasome component (PCI) domain protein
B.E	Pavir.Ib03534.1.p|PACid:30236825	Pavir.Ib03534.1	0.37331276	-1.284133284	0.000752	30236825	Pavir.Ib03534.1	LOC_Os10g34480.1	cytochrome P450, putative, expressed	AT5G23190.1	cytochrome P450, family 86, subfamily B, polypeptide 1
B.E	Pavir.J00136.1.p|PACid:30254398	Pavir.J00136.1	2.3940427	1.396858882	3.83e-06	30254398	Pavir.J00136.1	LOC_Os05g51440.1	hsp20/alpha crystallin family protein, putative, expressed	AT5G04890.1	HSP20-like chaperones superfamily protein
B.E	Pavir.J00987.1.p|PACid:30296007	Pavir.J00987.1	2.15412578	1.244512489	0.027992	30296007	Pavir.J00987.1	LOC_Os05g05940.1	stress-related protein, putative, expressed	AT3G05500.1	Rubber elongation factor protein (REF)
B.E	Pavir.J02005.1.p|PACid:30255874	Pavir.J02005.1	5.2072899	2.517942727	0.000101	30255874	Pavir.J02005.1	LOC_Os05g40400.1	harpin-induced protein 1 domain containing protein, expressed	AT3G05975.1	Late embryogenesis abundant (LEA) hydroxyproline-rich glycoprotein family
B.E	Pavir.J03259.1.p|PACid:30220532	Pavir.J03259.1	0.37802565	-1.26603397	0.017101	30220532	Pavir.J03259.1	LOC_Os05g23860.1	rab GDP dissociation inhibitor alpha, putative, expressed	AT3G59920.1	RAB GDP dissociation inhibitor 2
B.E	Pavir.J03411.1.p|PACid:30243184	Pavir.J03411.1	3.17493048	1.804135004	0.001465					AT3G07230.1	wound-responsive protein-related
B.E	Pavir.J04007.1.p|PACid:30273923	Pavir.J04007.1	2.43480759	1.421217768	0.007211
B.E	Pavir.J05051.1.p|PACid:30276953	Pavir.J05051.1	2.53810668	1.481162707	0.016066
B.E	Pavir.J05572.1.p|PACid:30196180	Pavir.J05572.1	2.35868927	1.375395375	0.002974
B.E	Pavir.J06779.1.p|PACid:30220066	Pavir.J06779.1	2.6926773	1.566451345	0.011692	30220066	Pavir.J06779.1	LOC_Os01g67000.1	membrane-associated 30 kDa protein, chloroplast precursor, putative, expressed	AT1G65260.1	plastid transcriptionally active 4
B.E	Pavir.J07398.1.p|PACid:30256951	Pavir.J07398.1	3.10820281	1.773490642	8.69e-05	30256951	Pavir.J07398.1	LOC_Os12g02530.1	BTBN22 - Bric-a-Brac, Tramtrack, Broad Complex BTB domain with non-phototropic hypocotyl 3 NPH3 and coiled-coil domains, expressed	AT2G30520.1	Phototropic-responsive NPH3 family protein
B.E	Pavir.J08990.1.p|PACid:30247406	Pavir.J08990.1	0.30483807	-1.576475005	0.000496	30247406	Pavir.J08990.1	LOC_Os10g37400.1	DUF538 domain containing protein, putative, expressed	AT4G24130.1	Protein of unknown function, DUF538
B.E	Pavir.J14918.1.p|PACid:30273607	Pavir.J14918.1	0.38978421	-1.221842442	0.003012	30273607	Pavir.J14918.1	LOC_Os04g27020.1	cytochrome P450, putative, expressed	AT5G25120.1	ytochrome p450, family 71, subfamily B, polypeptide 11
B.E	Pavir.J15840.1.p|PACid:30275278	Pavir.J15840.1	0.34331245	-1.404995916	0.007227	30275278	Pavir.J15840.1	LOC_Os11g38650.1	UDP-glucoronosyl/UDP-glucosyl transferase, putative, expressed	AT4G01070.1	UDP-Glycosyltransferase superfamily protein
B.E	Pavir.J16145.1.p|PACid:30301857	Pavir.J16145.1	2.23638445	1.298578221	0.003621	30301857	Pavir.J16145.1	LOC_Os10g42540.1	expressed protein	AT3G18410.1	Complex I subunit NDUFS6
B.E	Pavir.J16324.1.p|PACid:30195095	Pavir.J16324.1	2.32249131	1.353083199	0.036431	30195095	Pavir.J16324.1	LOC_Os06g46900.1	phosphosulfolactate synthase-related protein, putative, expressed	AT4G21320.1	Aldolase-type TIM barrel family protein
B.E	Pavir.J18635.1.p|PACid:30199985	Pavir.J18635.1	0.28818974	-1.657499098	0.000952	30199985	Pavir.J18635.1	LOC_Os03g50885.1	actin, putative, expressed	AT3G12110.1	actin-11
B.E	Pavir.J19251.1.p|PACid:30258484	Pavir.J19251.1	0.35646462	-1.350759215	0.000785	30258484	Pavir.J19251.1	LOC_Os01g22010.1	S-adenosylmethionine synthetase, putative, expressed	AT3G17390.1	S-adenosylmethionine synthetase family protein
B.E	Pavir.J19349.1.p|PACid:30207661	Pavir.J19349.1	2.17336723	1.257341961	0.001879	30207661	Pavir.J19349.1	LOC_Os03g56610.1	expressed protein	AT2G32580.1	Protein of unknown function (DUF1068)
B.E	Pavir.J19702.1.p|PACid:30277350	Pavir.J19702.1	2.59799475	1.514808516	0.002272	30277350	Pavir.J19702.1	LOC_Os04g24430.1	sucrose synthase, putative, expressed	AT1G73370.1	sucrose synthase 6
B.E	Pavir.J20667.1.p|PACid:30219561	Pavir.J20667.1	0.2824099	-1.686727432	0.005683	30219561	Pavir.J20667.1	LOC_Os07g34140.1	chalcone synthase, putative, expressed	AT5G13930.1	Chalcone and stilbene synthase family protein
B.E	Pavir.J21571.1.p|PACid:30208099	Pavir.J21571.1	0.29696208	-1.614239397	0.003769	30208099	Pavir.J21571.1	LOC_Os07g34140.1	chalcone synthase, putative, expressed	AT5G13930.1	Chalcone and stilbene synthase family protein
B.E	Pavir.J21656.1.p|PACid:30283869	Pavir.J21656.1	3.87093897	2.090093562	0.004301
B.E	Pavir.J24303.1.p|PACid:30281864	Pavir.J24303.1	2.13639139	1.232585972	0.004493	30281864	Pavir.J24303.1	LOC_Os09g38239.1	sulfotransferase domain containing protein, expressed	AT1G13420.1	sulfotransferase 4B
B.E	Pavir.J26569.1.p|PACid:30248154	Pavir.J26569.1	3.01431763	1.729241445	0.004128	30248154	Pavir.J26569.1	LOC_Os09g31430.1	Os9bglu30 - beta-glucosidase, similar to Os4bglu12 exoglucanase, expressed	AT3G60130.1	beta glucosidase 16
B.E	Pavir.J28216.1.p|PACid:30254282	Pavir.J28216.1	2.73866015	1.59088025	0.000379
B.E	Pavir.J31861.1.p|PACid:30202371	Pavir.J31861.1	0.31530388	-1.527775172	0.001107	30202371	Pavir.J31861.1	LOC_Os02g02130.1	ribosomal protein L37, putative, expressed	AT1G15250.1	Zinc-binding ribosomal protein family protein
B.E	Pavir.J33862.1.p|PACid:30247090	Pavir.J33862.1	8.54700947	3.232829721	0.012285	30247090	Pavir.J33862.1	LOC_Os05g05720.1	tetratricopeptide repeat domain containing protein, expressed	AT2G39090.1	tetratricopeptide repeat (TPR)-containing protein
B.E	Pavir.J34085.1.p|PACid:30199824	Pavir.J34085.1	2.51196001	1.4662235	0.01788	30199824	Pavir.J34085.1	LOC_Os05g41070.1	bZIP transcription factor, putative, expressed	AT3G56850.1	ABA-responsive element binding protein 3
B.E	Pavir.J34376.1.p|PACid:30255019	Pavir.J34376.1	0.36025327	-1.33550656	0.017052	30255019	Pavir.J34376.1	LOC_Os05g39310.1	thiamine pyrophosphate enzyme, C-terminal TPP binding domain containing protein, expressed	AT4G33070.1	Thiamine pyrophosphate dependent pyruvate decarboxylase family protein
B.E	Pavir.J37982.1.p|PACid:30217820	Pavir.J37982.1	4.0811731	2.166393904	0.025064	30217820	Pavir.J37982.1	LOC_Os02g14860.1	prefoldin subunit, putative, expressed	AT1G29990.1	prefoldin 6
B.E	Pavir.J39864.1.p|PACid:30276223	Pavir.J39864.1	2.23379832	1.296908939	0.011741	30276223	Pavir.J39864.1	LOC_Os01g01450.1	stress responsive protein, putative, expressed	AT2G39050.1	hydroxyproline-rich glycoprotein family protein
B.E	Pavir.J40862.1.p|PACid:30201738	Pavir.J40862.1	0.29265259	-1.635329055	0.010964	30201738	Pavir.J40862.1	LOC_Os08g02120.1	kinase, pfkB family, putative, expressed	AT4G10260.1	pfkB-like carbohydrate kinase family protein
B.E	Pavir.Aa00186.1.p|PACid:30249333	Pavir.Aa00186.1	3.01681835	1.730437831	0.000553
B.E	Pavir.Aa00282.1.p|PACid:30253178	Pavir.Aa00282.1	5.03705459	2.469990366	0.022494	30253178	Pavir.Aa00282.1	LOC_Os02g54140.1	hsp20/alpha crystallin family protein, putative, expressed	AT1G54050.1	HSP20-like chaperones superfamily protein
B.E	Pavir.Aa00332.1.p|PACid:30252986	Pavir.Aa00332.1	2.31772776	1.350121115	0.002087	30252986	Pavir.Aa00332.1	LOC_Os02g53320.1	universal stress protein domain containing protein, putative, expressed	AT3G03270.2	Adenine nucleotide alpha hydrolases-like superfamily protein
B.E	Pavir.Aa01512.1.p|PACid:30252328	Pavir.Aa01512.1	3.60037236	1.985556123	0.000127	30252328	Pavir.Aa01512.1	LOC_Os02g35940.1	gibberellin receptor GID1L2, putative, expressed	AT1G47480.1	alpha/beta-Hydrolases superfamily protein
B.E	Pavir.Aa01736.1.p|PACid:30251876	Pavir.Aa01736.1	0.33937863	-1.421622384	0.000887
B.E	Pavir.Aa02398.1.p|PACid:30249465	Pavir.Aa02398.1	0.37336287	-1.283939635	0.011609	30249465	Pavir.Aa02398.1	LOC_Os02g20360.1	tyrosine aminotransferase, putative, expressed	AT5G36160.1	Tyrosine transaminase family protein
B.E	Pavir.Aa02737.1.p|PACid:30249647	Pavir.Aa02737.1	4.66345597	2.358809496	0.022031	30249647	Pavir.Aa02737.1	LOC_Os02g15250.1	late embryogenesis abundant domain-containing protein, putative, expressed	AT5G44310.2	Late embryogenesis abundant protein (LEA) family protein
B.E	Pavir.Aa02791.1.p|PACid:30250198	Pavir.Aa02791.1	3.42883995	1.915130565	0.003002	30250198	Pavir.Aa02791.1	LOC_Os02g14860.1	prefoldin subunit, putative, expressed	AT1G29990.1	prefoldin 6
B.E	Pavir.Aa03322.1.p|PACid:30251014	Pavir.Aa03322.1	0.35027392	-1.376034534	0.011201	30251014	Pavir.Aa03322.1	LOC_Os02g07410.1	glycine cleavage system H protein, putative, expressed	AT2G35120.1	Single hybrid motif superfamily protein
B.E	Pavir.Ab00144.1.p|PACid:30232057	Pavir.Ab00144.1	2.56644509	1.497181392	0.026205	30232057	Pavir.Ab00144.1	LOC_Os02g03730.1	SWIB/MDM2 domain containing protein, expressed	AT2G14880.1	SWIB/MDM2 domain superfamily protein
B.E	Pavir.Ab00473.1.p|PACid:30236594	Pavir.Ab00473.1	0.34627347	-1.392606227	0.00409	30236594	Pavir.Ab00473.1	LOC_Os02g07410.1	glycine cleavage system H protein, putative, expressed	AT2G35120.1	Single hybrid motif superfamily protein
B.E	Pavir.Ab01361.1.p|PACid:30235021	Pavir.Ab01361.1	0.3545521	-1.358520458	0.005555	30235021	Pavir.Ab01361.1	LOC_Os02g19770.1	eukaryotic translation initiation factor 1A, putative, expressed	AT2G04520.1	Nucleic acid-binding, OB-fold-like protein
B.E	Pavir.Ab01809.1.p|PACid:30232311	Pavir.Ab01809.1	3.71671618	2.031438523	0.036973	30232311	Pavir.Ab01809.1	LOC_Os02g33070.1	expressed protein	AT5G04750.1	F1F0-ATPase inhibitor protein, putative
B.E	Pavir.Ab02053.1.p|PACid:30235451	Pavir.Ab02053.1	2.60281162	1.517480902	0.000588	30235451	Pavir.Ab02053.1	LOC_Os02g35940.1	gibberellin receptor GID1L2, putative, expressed	AT1G47480.1	alpha/beta-Hydrolases superfamily protein
B.E	Pavir.Ab02274.1.p|PACid:30236541	Pavir.Ab02274.1	2.80525641	1.625542642	0.003414	30236541	Pavir.Ab02274.1	LOC_Os02g39930.1	OsTIL-1 Temperature-induced lipocalin-1, expressed	AT5G58070.1	temperature-induced lipocalin
B.E	Pavir.Ba00222.1.p|PACid:30290494	Pavir.Ba00222.1	2.85323595	1.650009055	0.00073	30290494	Pavir.Ba00222.1	LOC_Os07g48160.1	alpha-galactosidase precursor, putative, expressed	AT3G56310.1	Melibiase family protein
B.E	Pavir.Ba00258.1.p|PACid:30291621	Pavir.Ba00258.1	2.97090872	1.708314277	0.000697	30291621	Pavir.Ba00258.1	LOC_Os03g20420.1	alpha-N-arabinofuranosidase A, putative, expressed	AT3G10740.1	alpha-L-arabinofuranosidase 1
B.E	Pavir.Ba01215.1.p|PACid:30290531	Pavir.Ba01215.1	4.5311974	2.317302343	0.014744	30290531	Pavir.Ba01215.1	LOC_Os09g36700.1	ribonuclease T2 family domain containing protein, expressed	AT1G14220.1	Ribonuclease T2 family protein
B.E	Pavir.Ba01698.1.p|PACid:30291323	Pavir.Ba01698.1	0.30569372	-1.572431186	0.002364	30291323	Pavir.Ba01698.1	LOC_Os09g31486.1	DnaK family protein, putative, expressed	AT5G09590.1	mitochondrial HSO70 2
B.E	Pavir.Ba03074.1.p|PACid:30292795	Pavir.Ba03074.1	2.2799943	1.326440219	0.015218
B.E	Pavir.Ba03478.1.p|PACid:30291380	Pavir.Ba03478.1	2.36836007	1.381298438	0.039539	30291380	Pavir.Ba03478.1	LOC_Os07g10500.1	cytochrome b-c1 complex subunit 7, putative, expressed	AT5G25450.1	Cytochrome bd ubiquinol oxidase, 14kDa subunit
B.E	Pavir.Ba03692.1.p|PACid:30293021	Pavir.Ba03692.1	2.12783674	1.226797461	0.010768	30293021	Pavir.Ba03692.1	LOC_Os07g07450.1	versicolorin reductase, putative, expressed	AT3G03980.1	NAD(P)-binding Rossmann-fold superfamily protein
B.E	Pavir.Bb00105.1.p|PACid:30297002	Pavir.Bb00105.1	0.30578993	-1.571977175	0.000686	30297002	Pavir.Bb00105.1	LOC_Os07g01410.1	peroxidase precursor, putative, expressed	AT3G01190.1	Peroxidase superfamily protein
B.E	Pavir.Bb00159.1.p|PACid:30301712	Pavir.Bb00159.1	0.22486535	-2.015456731	0.010457	30301712	Pavir.Bb00159.1	LOC_Os01g70525.1	tropinone reductase, putative, expressed	AT5G06060.1	NAD(P)-binding Rossmann-fold superfamily protein
B.E	Pavir.Bb00665.1.p|PACid:30296629	Pavir.Bb00665.1	0.38844881	-1.226793609	0.005188	30296629	Pavir.Bb00665.1	LOC_Os07g10150.1	coatomer subunit gamma-2, putative, expressed	AT4G34450.1	coatomer gamma-2 subunit, putative / gamma-2 coat protein, putative / gamma-2 COP, putative
B.E	Pavir.Bb00689.1.p|PACid:30298226	Pavir.Bb00689.1	3.63391755	1.998935685	0.040532	30298226	Pavir.Bb00689.1	LOC_Os04g51270.1	vacuolar ATPase G subunit, putative, expressed	AT3G01390.1	vacuolar membrane ATPase 10
B.E	Pavir.Bb00696.1.p|PACid:30297757	Pavir.Bb00696.1	0.3084359	-1.559547417	0.000242	30297757	Pavir.Bb00696.1	LOC_Os12g09700.1	Jacalin-like lectin domain containing protein, putative, expressed	AT1G19715.3	Mannose-binding lectin superfamily protein
B.E	Pavir.Bb00799.1.p|PACid:30298345	Pavir.Bb00799.1	2.31299642	1.347173031	0.012539	30298345	Pavir.Bb00799.1	LOC_Os12g43430.1	thaumatin, putative, expressed	AT4G11650.1	osmotin 34
B.E	Pavir.Bb01503.1.p|PACid:30300143	Pavir.Bb01503.1	2.1259117	1.225491676	0.003095	30300143	Pavir.Bb01503.1	LOC_Os11g24374.1	OsSCP55 - Putative Serine Carboxypeptidase homologue, expressed	AT2G22980.1	serine carboxypeptidase-like 13
B.E	Pavir.Bb02409.1.p|PACid:30298298	Pavir.Bb02409.1	3.5430079	1.962384682	0.001269	30298298	Pavir.Bb02409.1	LOC_Os09g30438.2	expressed protein	AT2G33690.1	Late embryogenesis abundant protein, group 6
B.E	Pavir.Bb02933.1.p|PACid:30300552	Pavir.Bb02933.1	2.34496467	1.366976188	0.001391	30300552	Pavir.Bb02933.1	LOC_Os07g35520.1	glucan endo-1,3-beta-glucosidase precursor, putative, expressed	AT5G55180.1	O-Glycosyl hydrolases family 17 protein
B.E	Pavir.Bb03197.1.p|PACid:30299608	Pavir.Bb03197.1	4.18444604	2.202446643	0.000487	30299608	Pavir.Bb03197.1	LOC_Os03g46070.1	thaumatin, putative, expressed	AT4G11650.1	osmotin 34
B.E	Pavir.Bb03618.1.p|PACid:30300930	Pavir.Bb03618.1	2.2590461	1.313123714	0.002554	30300930	Pavir.Bb03618.1	LOC_Os01g15320.1	RALFL9 - Rapid ALkalinization Factor RALF family protein precursor, expressed	AT4G15800.1	ralf-like 33
B.E	Pavir.Ca00608.1.p|PACid:30204384	Pavir.Ca00608.1	2.96194147	1.703953134	0.038613	30204384	Pavir.Ca00608.1	LOC_Os12g36210.1	inhibitor I family protein, putative, expressed	AT2G38870.1	Serine protease inhibitor, potato inhibitor I-type family protein
B.E	Pavir.Ca00811.1.p|PACid:30204135	Pavir.Ca00811.1	3.13582287	1.78625407	0.03513	30204135	Pavir.Ca00811.1	LOC_Os05g10210.1	HAD superfamily phosphatase, putative, expressed	AT4G25150.1	HAD superfamily, subfamily IIIB acid phosphatase
B.E	Pavir.Ca01780.1.p|PACid:30206225	Pavir.Ca01780.1	11.0700077	3.605994318	0.048549	30206225	Pavir.Ca01780.1	LOC_Os05g46480.1	late embryogenesis abundant protein, group 3, putative, expressed	AT3G15670.1	Late embryogenesis abundant protein (LEA) family protein
B.E	Pavir.Ca01801.1.p|PACid:30205996	Pavir.Ca01801.1	3.67578185	2.015461147	0.032212	30205996	Pavir.Ca01801.1	LOC_Os05g47446.1	expressed protein	AT1G29850.1	double-stranded DNA-binding family protein
B.E	Pavir.Ca02074.1.p|PACid:30206596	Pavir.Ca02074.1	0.37451931	-1.279478007	0.003704	30206596	Pavir.Ca02074.1	LOC_Os12g25630.1	sulfite oxidase, putative, expressed	AT3G01910.1	sulfite oxidase
B.E	Pavir.Ca02289.1.p|PACid:30205882	Pavir.Ca02289.1	2.33261319	1.35935709	0.003086	30205882	Pavir.Ca02289.1	LOC_Os06g02780.1	aspartic protease, putative, expressed	AT5G10770.1	Eukaryotic aspartyl protease family protein
B.E	Pavir.Ca02660.1.p|PACid:30206509	Pavir.Ca02660.1	2.42810316	1.417239719	0.022765	30206509	Pavir.Ca02660.1	LOC_Os12g36640.2	universal stress protein domain containing protein, putative, expressed	AT2G47710.1	Adenine nucleotide alpha hydrolases-like superfamily protein
B.E	Pavir.Cb00512.1.p|PACid:30268195	Pavir.Cb00512.1	2.57060479	1.499517825	0.00496	30268195	Pavir.Cb00512.1	LOC_Os12g38150.1	osmotin, putative, expressed	AT2G28790.1	Pathogenesis-related thaumatin superfamily protein
B.E	Pavir.Cb00701.1.p|PACid:30268632	Pavir.Cb00701.1	0.2521836	-1.85004361	0.006127	30268632	Pavir.Cb00701.1	LOC_Os12g25630.1	sulfite oxidase, putative, expressed	AT3G01910.1	sulfite oxidase
B.E	Pavir.Cb00761.1.p|PACid:30268661	Pavir.Cb00761.1	2.21701139	1.286026184	0.036072	30268661	Pavir.Cb00761.1	LOC_Os12g29400.1	GRAM domain containing protein, expressed	AT5G13200.1	GRAM domain family protein
B.E	Pavir.Cb00876.1.p|PACid:30269914	Pavir.Cb00876.1	2.27023481	1.320251521	0.034875	30269914	Pavir.Cb00876.1	LOC_Os12g35670.1	RALFL4 - Rapid ALkalinization Factor RALF family protein precursor, expressed	AT3G05490.1	ralf-like 22
B.E	Pavir.Cb00901.1.p|PACid:30269979	Pavir.Cb00901.1	0.25816225	-1.816240031	0.009427	30269979	Pavir.Cb00901.1	LOC_Os12g34890.1	acyl carrier protein, putative, expressed	AT4G25050.1	acyl carrier protein 4
B.E	Pavir.Cb01443.1.p|PACid:30269304	Pavir.Cb01443.1	3.56740434	1.972284743	0.002829
B.E	Pavir.Cb01805.1.p|PACid:30268747	Pavir.Cb01805.1	2.59084379	1.510832035	0.024954	30268747	Pavir.Cb01805.1	LOC_Os11g20790.1	adenylate kinase, putative, expressed	AT5G63400.1	adenylate kinase 1
B.E	Pavir.Cb02121.1.p|PACid:30267871	Pavir.Cb02121.1	2.97292176	1.709291497	0.001717	30267871	Pavir.Cb02121.1	LOC_Os11g03730.1	alpha-N-arabinofuranosidase A, putative, expressed	AT3G10740.1	alpha-L-arabinofuranosidase 1
B.E	Pavir.Da00146.1.p|PACid:30192844	Pavir.Da00146.1	7.16559126	2.978495751	0.001451	30192844	Pavir.Da00146.1	LOC_Os06g48020.1	peroxidase precursor, putative, expressed	AT4G30170.1	Peroxidase family protein
B.E	Pavir.Da00805.1.p|PACid:30193261	Pavir.Da00805.1	3.6892966	2.020755777	0.000899	30193261	Pavir.Da00805.1	LOC_Os06g35700.1	reticuline oxidase-like protein precursor, putative, expressed	AT4G20860.1	FAD-binding Berberine family protein
B.E	Pavir.Da00810.1.p|PACid:30192346	Pavir.Da00810.1	4.47007002	2.297707431	0.002336	30192346	Pavir.Da00810.1	LOC_Os06g35700.1	reticuline oxidase-like protein precursor, putative, expressed	AT4G20860.1	FAD-binding Berberine family protein
B.E	Pavir.Da01522.1.p|PACid:30193790	Pavir.Da01522.1	2.34521159	1.367128093	0.000516	30193790	Pavir.Da01522.1	LOC_Os06g29470.1	peroxidase precursor, putative, expressed	AT1G05260.1	Peroxidase superfamily protein
B.E	Pavir.Db01185.1.p|PACid:30262670	Pavir.Db01185.1	2.26671738	1.318014523	0.018094	30262670	Pavir.Db01185.1	LOC_Os06g30750.1	reticulon domain containing protein, putative, expressed	AT4G11220.1	VIRB2-interacting protein 2
B.E	Pavir.Db01776.1.p|PACid:30261030	Pavir.Db01776.1	3.92556288	2.110309536	0.000145	30261030	Pavir.Db01776.1	LOC_Os06g13720.1	dehydrogenase E1 component domain containing protein, expressed	AT1G24180.1	Thiamin diphosphate-binding fold (THDP-binding) superfamily protein
B.E	Pavir.Db02130.1.p|PACid:30260942	Pavir.Db02130.1	3.18138324	1.807064176	9.62e-06	30260942	Pavir.Db02130.1	LOC_Os06g06550.1	plant protein of unknown function domain containing protein, expressed	AT3G02645.1	Plant protein of unknown function (DUF247)
B.E	Pavir.Ea00048.1.p|PACid:30230356	Pavir.Ea00048.1	8.17514903	3.16865503	0.000143	30230356	Pavir.Ea00048.1	LOC_Os01g13210.1	salt stress root protein RS1, putative, expressed	AT4G20260.5	plasma-membrane associated cation-binding protein 1
B.E	Pavir.Ea00101.1.p|PACid:30231090	Pavir.Ea00101.1	2.18089347	1.262329301	0.038542	30231090	Pavir.Ea00101.1	LOC_Os01g12660.1	AAA-type ATPase family protein, putative, expressed	AT1G64110.3	P-loop containing nucleoside triphosphate hydrolases superfamily protein
B.E	Pavir.Ea00501.1.p|PACid:30230246	Pavir.Ea00501.1	6.10388114	2.747136868	0.011188	30230246	Pavir.Ea00501.1	LOC_Os01g05650.1	metallothionein, putative, expressed	AT3G09390.1	metallothionein 2A
B.E	Pavir.Ea00606.1.p|PACid:30226304	Pavir.Ea00606.1	4.82510785	2.407971189	0.032708	30226304	Pavir.Ea00606.1	LOC_Os01g04370.1	hsp20/alpha crystallin family protein, putative, expressed	AT5G59720.1	heat shock protein 18.2
B.E	Pavir.Ea01477.2.p|PACid:30231125	Pavir.Ea01477.2	2.44024561	1.424436363	0.001228	30231125	Pavir.Ea01477.2	LOC_Os01g22352.1	peroxidase precursor, putative, expressed	AT1G44970.1	Peroxidase superfamily protein
B.E	Pavir.Ea01561.1.p|PACid:30227923	Pavir.Ea01561.1	3.14815327	1.79191578	0.000265	30227923	Pavir.Ea01561.1	LOC_Os07g35680.1	TKL_IRAK_DUF26-lc22 - DUF26 kinases have homology to DUF26 containing loci, expressed	AT4G23180.1	cysteine-rich RLK (RECEPTOR-like protein kinase) 10
B.E	Pavir.Ea01573.1.p|PACid:30227608	Pavir.Ea01573.1	0.29150781	-1.640983575	0.001094	30227608	Pavir.Ea01573.1	LOC_Os01g39860.1	1-aminocyclopropane-1-carboxylate oxidase protein, putative, expressed	AT2G19590.1	ACC oxidase 1
B.E	Pavir.Ea02477.1.p|PACid:30226286	Pavir.Ea02477.1	3.35473292	1.883607912	0.030624	30226286	Pavir.Ea02477.1	LOC_Os01g49320.1	glycosyl hydrolase, putative, expressed	AT5G24090.1	chitinase A
B.E	Pavir.Ea02497.1.p|PACid:30228113	Pavir.Ea02497.1	2.77460473	1.609692258	0.000752	30228113	Pavir.Ea02497.1	LOC_Os01g49710.1	glutathione S-transferase, putative, expressed	AT1G10360.1	glutathione S-transferase TAU 18
B.E	Pavir.Ea02555.1.p|PACid:30227938	Pavir.Ea02555.1	6.22679686	2.775900213	0.036886
B.E	Pavir.Ea02930.1.p|PACid:30228432	Pavir.Ea02930.1	0.37677843	-1.270801723	0.000425	30228432	Pavir.Ea02930.1	LOC_Os10g17660.1	profilin domain containing protein, expressed	AT2G19770.1	profilin 5
B.E	Pavir.Ea03384.1.p|PACid:30226667	Pavir.Ea03384.1	4.8835321	2.42533498	0.02279
B.E	Pavir.Ea03391.1.p|PACid:30231527	Pavir.Ea03391.1	5.59842352	2.622430631	0.003491	30231527	Pavir.Ea03391.1	LOC_Os01g62980.1	LTPL101 - Protease inhibitor/seed storage/LTP family protein precursor, expressed	AT5G05960.1	Bifunctional inhibitor/lipid-transfer protein/seed storage 2S albumin superfamily protein
B.E	Pavir.Eb00019.1.p|PACid:30314169	Pavir.Eb00019.1	9.91112746	3.446459183	0.000766	30314169	Pavir.Eb00019.1	LOC_Os01g13210.1	salt stress root protein RS1, putative, expressed	AT4G20260.5	plasma-membrane associated cation-binding protein 1
B.E	Pavir.Eb00652.1.p|PACid:30309445	Pavir.Eb00652.1	2.24575552	1.30461088	0.00559
B.E	Pavir.Eb00944.1.p|PACid:30309163	Pavir.Eb00944.1	2.80137756	1.62354644	0.014601	30309163	Pavir.Eb00944.1	LOC_Os01g15320.1	RALFL9 - Rapid ALkalinization Factor RALF family protein precursor, expressed	AT4G15800.1	ralf-like 33
B.E	Pavir.Eb01124.1.p|PACid:30311582	Pavir.Eb01124.1	2.75839166	1.601237317	0.006231	30311582	Pavir.Eb01124.1	LOC_Os01g16430.1	cysteine proteinase inhibitor precursor protein, putative, expressed	AT3G12490.2	cystatin B
B.E	Pavir.Eb03276.1.p|PACid:30312971	Pavir.Eb03276.1	3.15405621	1.794618373	0.000732	30312971	Pavir.Eb03276.1	LOC_Os01g56150.1	OsProCP1 - Putative Lysosomal Pro-x Carboxypeptidase homologue, expressed	AT5G65760.1	Serine carboxypeptidase S28 family protein
B.E	Pavir.Eb03528.1.p|PACid:30313714	Pavir.Eb03528.1	2.79281607	1.619130564	0.00655	30313714	Pavir.Eb03528.1	LOC_Os01g70520.1	Os1bglu5 - beta-glucosidase homologue, similar to G. max isohydroxyurate hydrolase, expressed	AT1G02850.2	beta glucosidase 11
B.E	Pavir.Eb03806.1.p|PACid:30312699	Pavir.Eb03806.1	5.78531813	2.669806293	0.040786	30312699	Pavir.Eb03806.1	LOC_Os12g43490.1	thaumatin, putative, expressed	AT4G11650.1	osmotin 34
B.E	Pavir.Fa00172.1.p|PACid:30188767	Pavir.Fa00172.1	2.7619107	1.603076675	0.02125	30188767	Pavir.Fa00172.1	LOC_Os08g44460.3	expressed protein	AT5G04750.1	F1F0-ATPase inhibitor protein, putative
B.E	Pavir.Fa00854.1.p|PACid:30186975	Pavir.Fa00854.1	0.35336345	-1.363365292	0.021986	30186975	Pavir.Fa00854.1	LOC_Os08g33370.1	14-3-3 protein, putative, expressed	AT3G02520.1	general regulatory factor 7
B.E	Pavir.Fa01008.1.p|PACid:30186143	Pavir.Fa01008.1	2.35001249	1.370078424	0.00023	30186143	Pavir.Fa01008.1	LOC_Os08g02230.1	FAD-binding and arabino-lactone oxidase domains containing protein, putative, expressed	AT2G46750.1	D-arabinono-1,4-lactone oxidase family protein
B.E	Pavir.Fa01429.1.p|PACid:30188288	Pavir.Fa01429.1	2.22757064	1.292881182	0.003205	30188288	Pavir.Fa01429.1	LOC_Os03g12230.1	caleosin related protein, putative, expressed	AT2G33380.1	Caleosin-related family protein
B.E	Pavir.Fa01472.1.p|PACid:30186898	Pavir.Fa01472.1	3.82159855	2.071586236	0.003923	30186898	Pavir.Fa01472.1	LOC_Os08g27850.1	endothelial differentiation-related factor 1, putative, expressed	AT2G42680.1	multiprotein bridging factor 1A
B.E	Pavir.Fa01556.1.p|PACid:30187567	Pavir.Fa01556.1	5.82473938	2.6796035	4.13e-07	30187567	Pavir.Fa01556.1	LOC_Os08g02230.1	FAD-binding and arabino-lactone oxidase domains containing protein, putative, expressed	AT1G32300.1	D-arabinono-1,4-lactone oxidase family protein
B.E	Pavir.Fa01601.1.p|PACid:30186390	Pavir.Fa01601.1	4.7176578	2.375480776	0.000124	30186390	Pavir.Fa01601.1	LOC_Os08g02230.1	FAD-binding and arabino-lactone oxidase domains containing protein, putative, expressed	AT2G46760.1	D-arabinono-1,4-lactone oxidase family protein
B.E	Pavir.Fa01696.1.p|PACid:30187488	Pavir.Fa01696.1	0.35372576	-1.36188679	0.00844	30187488	Pavir.Fa01696.1	LOC_Os08g16910.1	dehydrogenase, putative, expressed	AT4G39330.1	cinnamyl alcohol dehydrogenase 9
B.E	Pavir.Fa01764.1.p|PACid:30187362	Pavir.Fa01764.1	2.3113907	1.34617114	0.007857	30187362	Pavir.Fa01764.1	LOC_Os08g12800.1	glucan endo-1,3-beta-glucosidase precursor, putative, expressed	AT5G58090.1	O-Glycosyl hydrolases family 17 protein
B.E	Pavir.Fa02143.1.p|PACid:30186405	Pavir.Fa02143.1	2.1251468	1.224972506	0.042909	30186405	Pavir.Fa02143.1	LOC_Os08g01450.1	cytochrome P450, putative, expressed	AT3G48280.1	cytochrome P450, family 71, subfamily A, polypeptide 25
B.E	Pavir.Fb00053.1.p|PACid:30278567	Pavir.Fb00053.1	0.37830471	-1.264969344	0.008397	30278567	Pavir.Fb00053.1	LOC_Os08g02340.1	60S acidic ribosomal protein, putative, expressed	AT5G24510.1	60S acidic ribosomal protein family
B.E	Pavir.Fb00477.1.p|PACid:30279639	Pavir.Fb00477.1	3.32880172	1.87241294	0.005334
B.E	Pavir.Fb00620.1.p|PACid:30278273	Pavir.Fb00620.1	2.28977533	1.332616047	0.001067	30278273	Pavir.Fb00620.1	LOC_Os08g09250.2	glyoxalase family protein, putative, expressed	AT1G11840.6	glyoxalase I homolog
B.E	Pavir.Fb00791.1.p|PACid:30280037	Pavir.Fb00791.1	4.98429826	2.4548004	0.005372	30280037	Pavir.Fb00791.1	LOC_Os08g25734.1	glucose-1-phosphate adenylyltransferase large subunit, chloroplast precursor, putative, expressed	AT5G48300.1	ADP glucose pyrophosphorylase 1
B.E	Pavir.Fb01262.1.p|PACid:30280025	Pavir.Fb01262.1	2.30472683	1.342005763	0.000355	30280025	Pavir.Fb01262.1	LOC_Os01g32780.1	universal stress protein domain containing protein, putative, expressed	AT1G68300.1	Adenine nucleotide alpha hydrolases-like superfamily protein
B.E	Pavir.Fb01387.1.p|PACid:30279215	Pavir.Fb01387.1	3.60820822	1.988692594	0.006899	30279215	Pavir.Fb01387.1	LOC_Os08g27850.1	endothelial differentiation-related factor 1, putative, expressed	AT2G42680.1	multiprotein bridging factor 1A
B.E	Pavir.Fb01711.1.p|PACid:30278677	Pavir.Fb01711.1	3.71316882	2.030060909	0.00381	30278677	Pavir.Fb01711.1	LOC_Os08g36320.3	decarboxylase, putative, expressed	AT5G17330.1	glutamate decarboxylase
B.E	Pavir.Fb02055.1.p|PACid:30278309	Pavir.Fb02055.1	2.42277204	1.414068669	0.004682	30278309	Pavir.Fb02055.1	LOC_Os01g05610.1	Core histone H2A/H2B/H3/H4 domain containing protein, putative, expressed	AT5G59910.1	Histone superfamily protein
B.E	Pavir.Fb02222.1.p|PACid:30279249	Pavir.Fb02222.1	2.2352378	1.297838321	0.010759	30279249	Pavir.Fb02222.1	LOC_Os08g44770.1	copper/zinc superoxide dismutase, putative, expressed	AT2G28190.1	copper/zinc superoxide dismutase 2
B.E	Pavir.Ga00426.1.p|PACid:30304413	Pavir.Ga00426.1	0.35920096	-1.339726877	9.32e-05	30304413	Pavir.Ga00426.1	LOC_Os04g53210.1	hydroxyacid oxidase 1, putative, expressed	AT4G18360.1	Aldolase-type TIM barrel family protein
B.E	Pavir.Ga00514.2.p|PACid:30305072	Pavir.Ga00514.2	0.2677546	-1.763606739	0.002151	30305072	Pavir.Ga00514.2	LOC_Os04g58570.1	C2 domain containing protein, putative, expressed	AT1G63220.1	Calcium-dependent lipid-binding (CaLB domain) family protein
B.E	Pavir.Ga00880.1.p|PACid:30306064	Pavir.Ga00880.1	2.41700442	1.410630109	0.016619	30306064	Pavir.Ga00880.1	LOC_Os04g45070.1	remorin, putative, expressed	AT3G61260.1	Remorin family protein
B.E	Pavir.Ga01407.1.p|PACid:30304106	Pavir.Ga01407.1	3.08431391	1.762359605	0.004114	30304106	Pavir.Ga01407.1	LOC_Os04g39420.1	6-phosphofructokinase 2, putative, expressed	AT5G47810.1	phosphofructokinase 2
B.E	Pavir.Ga01474.1.p|PACid:30304748	Pavir.Ga01474.1	6.08035815	2.741566304	0.00018	30304748	Pavir.Ga01474.1	LOC_Os04g38390.1	wound/stress protein, putative, expressed	AT4G39730.1	Lipase/lipooxygenase, PLAT/LH2 family protein
B.E	Pavir.Ga01599.1.p|PACid:30305090	Pavir.Ga01599.1	8.42125149	3.211444649	0.013479
B.E	Pavir.Ga01678.1.p|PACid:30303654	Pavir.Ga01678.1	2.3192509	1.351068904	0.00831	30303654	Pavir.Ga01678.1	LOC_Os04g37490.1	oxidoreductase, aldo/keto reductase family protein, putative, expressed	AT1G59960.1	NAD(P)-linked oxidoreductase superfamily protein
B.E	Pavir.Ga01718.1.p|PACid:30303744	Pavir.Ga01718.1	2.64566802	1.541042043	0.036771	30303744	Pavir.Ga01718.1	LOC_Os04g36750.1	hsp20/alpha crystallin family protein, putative, expressed	AT4G10250.1	HSP20-like chaperones superfamily protein
B.E	Pavir.Ga01969.1.p|PACid:30303763	Pavir.Ga01969.1	0.3833663	-1.245794584	0.000739	30303763	Pavir.Ga01969.1	LOC_Os04g31700.1	methylisocitrate lyase 2, putative, expressed	AT2G43180.2	Phosphoenolpyruvate carboxylase family protein
B.E	Pavir.Gb00126.1.p|PACid:30223660	Pavir.Gb00126.1	0.39019349	-1.220328404	0.021512	30223660	Pavir.Gb00126.1	LOC_Os04g56740.1	IQ calmodulin-binding motif family protein, putative, expressed	AT1G19870.1	IQ-domain 32
B.E	Pavir.Gb00667.1.p|PACid:30221854	Pavir.Gb00667.1	3.42467028	1.913375093	0.004308
B.E	Pavir.Gb00738.1.p|PACid:30224391	Pavir.Gb00738.1	2.53555543	1.479711816	0.013515	30224391	Pavir.Gb00738.1	LOC_Os04g45070.1	remorin, putative, expressed	AT3G61260.1	Remorin family protein
B.E	Pavir.Gb01438.1.p|PACid:30222902	Pavir.Gb01438.1	3.46867158	1.931793252	0.012136	30222902	Pavir.Gb01438.1	LOC_Os04g41580.1	glycine-rich protein, putative, expressed	AT3G59640.1	glycine-rich protein
B.E	Pavir.Gb01642.1.p|PACid:30222355	Pavir.Gb01642.1	2.15799501	1.247101528	0.011834	30222355	Pavir.Gb01642.1	LOC_Os04g35520.1	OsAPx7 - Stromal Ascorbate Peroxidase encoding gene 5,8, expressed	AT4G08390.1	stromal ascorbate peroxidase
B.E	Pavir.Gb01868.1.p|PACid:30222408	Pavir.Gb01868.1	3.79479023	2.061430138	0.032928	30222408	Pavir.Gb01868.1	LOC_Os04g33920.1	LTPL102 - Protease inhibitor/seed storage/LTP family protein precursor, expressed	AT5G05960.1	Bifunctional inhibitor/lipid-transfer protein/seed storage 2S albumin superfamily protein
B.E	Pavir.Gb02161.1.p|PACid:30221760	Pavir.Gb02161.1	2.79168045	1.618543811	0.000628	30221760	Pavir.Gb02161.1	LOC_Os01g71080.1	xylanase inhibitor, putative, expressed	AT1G03230.1	Eukaryotic aspartyl protease family protein
B.E	Pavir.Gb02335.1.p|PACid:30223182	Pavir.Gb02335.1	2.88479777	1.665880185	0.001544	30223182	Pavir.Gb02335.1	LOC_Os04g19740.1	transketolase, chloroplast precursor, putative, expressed	AT2G45290.1	Transketolase
B.E	Pavir.Ha00805.1.p|PACid:30317593	Pavir.Ha00805.1	2.41126992	1.407203154	0.019979
B.E	Pavir.Ha01832.1.p|PACid:30318014	Pavir.Ha01832.1	3.35663083	1.884423875	0.004535	30318014	Pavir.Ha01832.1	LOC_Os11g06340.1	ubiquinol-cytochrome C reductase hinge protein, putative, expressed	AT1G15120.1	Ubiquinol-cytochrome C reductase hinge protein
B.E	Pavir.Hb00048.1.p|PACid:30266369	Pavir.Hb00048.1	2.85786964	1.652350111	0.005482	30266369	Pavir.Hb00048.1	LOC_Os11g47809.1	metallothionein, putative, expressed	AT3G09390.1	metallothionein 2A
B.E	Pavir.Hb00966.1.p|PACid:30264185	Pavir.Hb00966.1	0.33215597	-1.45265723	0.000473	30264185	Pavir.Hb00966.1	LOC_Os11g31090.1	transferase family protein, putative, expressed	AT5G41040.1	HXXXD-type acyl-transferase family protein
B.E	Pavir.Hb00971.1.p|PACid:30264344	Pavir.Hb00971.1	6.74070934	2.890310417	0.002452
B.E	Pavir.Hb01571.1.p|PACid:30264315	Pavir.Hb01571.1	3.86926251	2.089468613	0.001291	30264315	Pavir.Hb01571.1	LOC_Os06g32550.1	THION14 - Plant thionin family protein precursor, putative, expressed	AT1G66100.1	Plant thionin
B.E	Pavir.Hb01608.1.p|PACid:30265005	Pavir.Hb01608.1	2.67894214	1.559073425	0.005532	30265005	Pavir.Hb01608.1	LOC_Os11g14990.1	expressed protein	AT2G31725.1	Eukaryotic protein of unknown function (DUF842)
B.E	Pavir.Ia00088.1.p|PACid:30209179	Pavir.Ia00088.1	2.51613464	1.468619125	0.048017	30209179	Pavir.Ia00088.1	LOC_Os03g63740.1	NFD2, putative, expressed	AT1G24450.1	Ribonuclease III family protein
B.E	Pavir.Ia00797.1.p|PACid:30210919	Pavir.Ia00797.1	2.29482935	1.335796872	0.005631	30210919	Pavir.Ia00797.1	LOC_Os03g50160.1	plastocyanin-like domain containing protein, putative, expressed	AT2G02850.1	plantacyanin
B.E	Pavir.Ia00863.1.p|PACid:30209658	Pavir.Ia00863.1	2.29290607	1.334587254	0.005059	30209658	Pavir.Ia00863.1	LOC_Os03g50490.1	glutamine synthetase, catalytic domain containing protein, expressed	AT1G66200.1	glutamine synthase clone F11
B.E	Pavir.Ia01105.1.p|PACid:30210515	Pavir.Ia01105.1	2.48067129	1.44814058	0.041133	30210515	Pavir.Ia01105.1	LOC_Os03g45390.1	glucan endo-1,3-beta-glucosidase precursor, putative, expressed	AT2G19440.1	O-Glycosyl hydrolases family 17 protein
B.E	Pavir.Ia01182.1.p|PACid:30215723	Pavir.Ia01182.1	2.94264935	1.69452564	0.000397	30215723	Pavir.Ia01182.1	LOC_Os03g45340.1	hsp20/alpha crystallin family protein, putative, expressed	AT5G04890.1	HSP20-like chaperones superfamily protein
B.E	Pavir.Ia01894.1.p|PACid:30209168	Pavir.Ia01894.1	3.69643117	2.023543048	0.000106	30209168	Pavir.Ia01894.1	LOC_Os10g30180.1	hsp20/alpha crystallin family protein, putative, expressed	AT5G20970.1	HSP20-like chaperones superfamily protein
B.E	Pavir.Ia01975.1.p|PACid:30210367	Pavir.Ia01975.1	2.99772625	1.721278646	0.000699	30210367	Pavir.Ia01975.1	LOC_Os10g27280.1	thaumatin, putative, expressed	AT5G40020.1	Pathogenesis-related thaumatin superfamily protein
B.E	Pavir.Ia02658.1.p|PACid:30211741	Pavir.Ia02658.1	2.6911621	1.565639293	0.011205
B.E	Pavir.Ia02811.1.p|PACid:30212405	Pavir.Ia02811.1	2.77603051	1.610433425	0.017363	30212405	Pavir.Ia02811.1	LOC_Os10g02040.1	peroxidase precursor, putative, expressed	AT5G06720.1	peroxidase 2
B.E	Pavir.Ia03415.1.p|PACid:30214719	Pavir.Ia03415.1	2.28981344	1.33264006	0.024358	30214719	Pavir.Ia03415.1	LOC_Os03g22120.1	sucrose synthase, putative, expressed	AT4G02280.1	sucrose synthase 3
B.E	Pavir.Ia03444.1.p|PACid:30214087	Pavir.Ia03444.1	2.310876	1.345849851	0.001568	30214087	Pavir.Ia03444.1	LOC_Os03g21040.2	stress responsive protein, putative, expressed	AT2G39050.1	hydroxyproline-rich glycoprotein family protein
B.E	Pavir.Ia03678.1.p|PACid:30215378	Pavir.Ia03678.1	3.70920571	2.028520282	0.035782	30215378	Pavir.Ia03678.1	LOC_Os03g20680.1	late embryogenesis abundant protein 1, putative, expressed	AT3G53040.1	late embryogenesis abundant protein, putative / LEA protein, putative
B.E	Pavir.Ib01026.1.p|PACid:30238031	Pavir.Ib01026.1	2.66099626	1.549376482	0.015327	30238031	Pavir.Ib01026.1	LOC_Os03g14180.1	hsp20/alpha crystallin family protein, putative, expressed	AT4G27670.1	heat shock protein 21
B.E	Pavir.Ib01136.1.p|PACid:30237887	Pavir.Ib01136.1	3.89085951	2.09749889	0.001301	30237887	Pavir.Ib01136.1	LOC_Os03g15960.1	hsp20/alpha crystallin family protein, putative, expressed	AT3G46230.1	heat shock protein 17.4
B.E	Pavir.Ib01269.1.p|PACid:30240572	Pavir.Ib01269.1	2.19145284	1.269297631	0.007897
B.E	Pavir.Ib01540.1.p|PACid:30237822	Pavir.Ib01540.1	6.11172711	2.748990129	0.013292	30237822	Pavir.Ib01540.1	LOC_Os03g21260.1	2,3-bisphosphoglycerate-independent phosphoglycerate mutase, putative, expressed	AT3G08590.1	Phosphoglycerate mutase, 2,3-bisphosphoglycerate-independent
B.E	Pavir.Ib01632.1.p|PACid:30237007	Pavir.Ib01632.1	0.25660365	-1.824976425	0.028213	30237007	Pavir.Ib01632.1	LOC_Os03g25340.1	peroxidase precursor, putative, expressed	AT5G42180.1	Peroxidase superfamily protein
B.E	Pavir.Ib01771.1.p|PACid:30241978	Pavir.Ib01771.1	2.12225953	1.223011096	0.045901	30241978	Pavir.Ib01771.1	LOC_Os03g25480.1	cytochrome P450, putative, expressed	AT2G46950.1	cytochrome P450, family 709, subfamily B, polypeptide 2
B.E	Pavir.Ib02577.1.p|PACid:30239592	Pavir.Ib02577.1	3.66565647	2.011481587	0.014884	30239592	Pavir.Ib02577.1	LOC_Os06g31280.1	THION1 - Plant thionin family protein precursor, putative, expressed	AT1G66100.1	Plant thionin
B.E	Pavir.Ib02745.1.p|PACid:30240470	Pavir.Ib02745.1	2.54108542	1.482854873	0.000931
B.E	Pavir.Ib03696.1.p|PACid:30241723	Pavir.Ib03696.1	3.46494443	1.930242217	0.013878
B.E	Pavir.Ib03775.1.p|PACid:30239410	Pavir.Ib03775.1	2.79990855	1.622789706	0.003808	30239410	Pavir.Ib03775.1	LOC_Os11g44810.1	auxin-repressed protein, putative, expressed	AT2G33830.2	Dormancy/auxin associated family protein
B.E	Pavir.J00130.1.p|PACid:30200135	Pavir.J00130.1	3.46321681	1.929522708	6.27e-05	30200135	Pavir.J00130.1	LOC_Os04g26910.1	oxidoreductase, aldo/keto reductase family protein, putative, expressed	AT1G60730.1	NAD(P)-linked oxidoreductase superfamily protein
B.E	Pavir.J00683.1.p|PACid:30255035	Pavir.J00683.1	10.4988763	3.529573017	0.002805	30255035	Pavir.J00683.1	LOC_Os01g62980.1	LTPL101 - Protease inhibitor/seed storage/LTP family protein precursor, expressed	AT5G05960.1	Bifunctional inhibitor/lipid-transfer protein/seed storage 2S albumin superfamily protein
B.E	Pavir.J00825.1.p|PACid:30273963	Pavir.J00825.1	0.37313611	-1.284816102	0.000487	30273963	Pavir.J00825.1	LOC_Os03g13180.1	peroxidase precursor, putative, expressed	AT5G06730.1	Peroxidase superfamily protein
B.E	Pavir.J00839.1.p|PACid:30281656	Pavir.J00839.1	4.34272431	2.256010367	0.038569
B.E	Pavir.J00892.1.p|PACid:30275043	Pavir.J00892.1	9.02630698	3.311545844	0.009973	30275043	Pavir.J00892.1	LOC_Os03g60580.1	actin-depolymerizing factor, putative, expressed	AT1G01750.1	actin depolymerizing factor 11
B.E	Pavir.J01051.1.p|PACid:30191168	Pavir.J01051.1	2.58644784	1.508382098	0.000269	30191168	Pavir.J01051.1	LOC_Os09g33690.2	Os9bglu32 - beta-glucosidase homologue, similar to G. max hydroxyisourate hydrolase, expressed	AT1G02850.2	beta glucosidase 11
B.E	Pavir.J01160.1.p|PACid:30306248	Pavir.J01160.1	3.92548826	2.110282112	0.034652	30306248	Pavir.J01160.1	LOC_Os03g58170.1	stem-specific protein TSJT1, putative, expressed	AT3G22850.1	Aluminium induced protein with YGL and LRDR motifs
B.E	Pavir.J01199.1.p|PACid:30263609	Pavir.J01199.1	2.76175723	1.602996505	0.007513	30263609	Pavir.J01199.1	LOC_Os06g51084.1	1,4-alpha-glucan-branching enzyme, chloroplast precursor, putative, expressed	AT5G03650.1	starch branching enzyme 2.2
B.E	Pavir.J01384.1.p|PACid:30255517	Pavir.J01384.1	0.37069888	-1.294270333	0.001623	30255517	Pavir.J01384.1	LOC_Os03g50560.1	RNA recognition motif containing protein, putative, expressed	AT4G17720.1	RNA-binding (RRM/RBD/RNP motifs) family protein
B.E	Pavir.J01632.1.p|PACid:30273203	Pavir.J01632.1	3.5321163	1.957942845	0.005851	30273203	Pavir.J01632.1	LOC_Os05g35740.1	subtilisin N-terminal Region family protein, expressed	AT1G71950.1	Proteinase inhibitor, propeptide
B.E	Pavir.J01936.1.p|PACid:30195714	Pavir.J01936.1	5.16256983	2.505499391	0.026256	30195714	Pavir.J01936.1	LOC_Os02g51710.1	wound/stress protein, putative, expressed	AT4G39730.1	Lipase/lipooxygenase, PLAT/LH2 family protein
B.E	Pavir.J01963.1.p|PACid:30218288	Pavir.J01963.1	0.29516677	-1.622987766	0.002747	30218288	Pavir.J01963.1	LOC_Os09g31486.1	DnaK family protein, putative, expressed	AT5G09590.1	mitochondrial HSO70 2
B.E	Pavir.J02207.1.p|PACid:30225449	Pavir.J02207.1	0.38506497	-1.239416201	0.001554	30225449	Pavir.J02207.1	LOC_Os05g33570.2	pyruvate, phosphate dikinase, chloroplast precursor, putative, expressed	AT4G15530.1	pyruvate orthophosphate dikinase
B.E	Pavir.J02298.1.p|PACid:30207734	Pavir.J02298.1	0.31319919	-1.537437613	0.001018	30207734	Pavir.J02298.1	LOC_Os08g02120.1	kinase, pfkB family, putative, expressed	AT4G10260.1	pfkB-like carbohydrate kinase family protein
B.E	Pavir.J03658.1.p|PACid:30284254	Pavir.J03658.1	3.55001322	1.965234399	0.043661	30284254	Pavir.J03658.1	LOC_Os05g47446.1	expressed protein	AT1G29850.1	double-stranded DNA-binding family protein
B.E	Pavir.J04506.2.p|PACid:30271067	Pavir.J04506.2	0.38397793	-1.243494707	0.034986	30271067	Pavir.J04506.2	LOC_Os03g21940.1	60S ribosomal protein L19-3, putative, expressed	AT1G02780.1	Ribosomal protein L19e family protein
B.E	Pavir.J05150.1.p|PACid:30200200	Pavir.J05150.1	2.28019869	1.326569543	0.001236	30200200	Pavir.J05150.1	LOC_Os08g44400.1	glutathione S-transferase, N-terminal domain containing protein, expressed	AT5G03880.1	Thioredoxin family protein
B.E	Pavir.J06494.1.p|PACid:30286195	Pavir.J06494.1	5.17389508	2.508660797	0.001013	30286195	Pavir.J06494.1	LOC_Os03g41060.1	GASR2 - Gibberellin-regulated GASA/GAST/Snakin family protein precursor, putative, expressed	AT2G14900.1	Gibberellin-regulated family protein
B.E	Pavir.J06780.1.p|PACid:30220067	Pavir.J06780.1	0.30738053	-1.564492292	0.030974	30220067	Pavir.J06780.1	LOC_Os01g67010.1	expressed protein	AT3G07570.1	Cytochrome b561/ferric reductase transmembrane with DOMON related domain
B.E	Pavir.J06823.1.p|PACid:30294236	Pavir.J06823.1	2.56443628	1.496051725	2.31e-06	30294236	Pavir.J06823.1	LOC_Os06g06550.1	plant protein of unknown function domain containing protein, expressed	AT3G02645.1	Plant protein of unknown function (DUF247)
B.E	Pavir.J06934.1.p|PACid:30275192	Pavir.J06934.1	2.87995287	1.663455201	0.026331	30275192	Pavir.J06934.1	LOC_Os07g28400.1	CDGSH iron sulfur domain-containing protein 1, putative, expressed	AT5G51720.1	2 iron, 2 sulfur cluster binding
B.E	Pavir.J07718.1.p|PACid:30257326	Pavir.J07718.1	0.38951342	-1.222845073	0.014737	30257326	Pavir.J07718.1	LOC_Os10g37430.1	expressed protein	AT5G41950.1	Tetratricopeptide repeat (TPR)-like superfamily protein
B.E	Pavir.J07818.1.p|PACid:30243543	Pavir.J07818.1	2.72334739	1.582791023	0.011895	30243543	Pavir.J07818.1	LOC_Os04g36750.1	hsp20/alpha crystallin family protein, putative, expressed	AT4G10250.1	HSP20-like chaperones superfamily protein
B.E	Pavir.J08319.1.p|PACid:30216763	Pavir.J08319.1	4.02111162	2.145004385	0.03522	30216763	Pavir.J08319.1	LOC_Os04g51270.1	vacuolar ATPase G subunit, putative, expressed	AT3G01390.1	vacuolar membrane ATPase 10
B.E	Pavir.J08343.1.p|PACid:30273449	Pavir.J08343.1	2.38431592	1.390985406	0.018005	30273449	Pavir.J08343.1	LOC_Os05g06780.1	LTPL104 - Protease inhibitor/seed storage/LTP family protein precursor, expressed	AT5G05960.1	Bifunctional inhibitor/lipid-transfer protein/seed storage 2S albumin superfamily protein
B.E	Pavir.J08876.1.p|PACid:30275693	Pavir.J08876.1	2.6517218	1.544339424	0.032592	30275693	Pavir.J08876.1	LOC_Os06g51060.1	CHIT8 - Chitinase family protein precursor, expressed	AT3G12500.1	basic chitinase
B.E	Pavir.J08895.1.p|PACid:30257540	Pavir.J08895.1	4.00390634	2.138818226	0.005777	30257540	Pavir.J08895.1	LOC_Os12g12560.1	NADP-dependent oxidoreductase, putative, expressed	AT3G03080.1	Zinc-binding dehydrogenase family protein
B.E	Pavir.J09198.1.p|PACid:30218083	Pavir.J09198.1	3.62636252	1.995933154	0.014418	30218083	Pavir.J09198.1	LOC_Os05g50380.1	glucose-1-phosphate adenylyltransferase large subunit, chloroplast precursor, putative, expressed	AT1G27680.1	ADPGLC-PPase large subunit
B.E	Pavir.J09784.1.p|PACid:30274978	Pavir.J09784.1	2.58137512	1.505549805	0.001862
B.E	Pavir.J10133.1.p|PACid:30243454	Pavir.J10133.1	2.30748943	1.34373404	0.021021	30243454	Pavir.J10133.1	LOC_Os09g12660.1	glucose-1-phosphate adenylyltransferase large subunit, chloroplast precursor, putative, expressed	AT5G48300.1	ADP glucose pyrophosphorylase 1
B.E	Pavir.J10323.1.p|PACid:30190884	Pavir.J10323.1	0.31244241	-1.540927809	0.000346	30190884	Pavir.J10323.1	LOC_Os01g39860.1	1-aminocyclopropane-1-carboxylate oxidase protein, putative, expressed	AT2G19590.1	ACC oxidase 1
B.E	Pavir.J10328.1.p|PACid:30314966	Pavir.J10328.1	3.39398627	1.900390727	0.017639	30314966	Pavir.J10328.1	LOC_Os02g33730.1	ubiquinol-cytochrome C reductase hinge protein, putative, expressed	AT1G15120.2	Ubiquinol-cytochrome C reductase hinge protein
B.E	Pavir.J10403.1.p|PACid:30271807	Pavir.J10403.1	0.22234057	-2.031746876	0.010542	30271807	Pavir.J10403.1	LOC_Os02g40664.1	zinc finger family protein, putative, expressed	AT5G60710.1	Zinc finger (C3HC4-type RING finger) family protein
B.E	Pavir.J11658.1.p|PACid:30207612	Pavir.J11658.1	6.66375774	2.873745953	0.022637	30207612	Pavir.J11658.1	LOC_Os03g19290.1	mitochondrial import inner membrane translocase subunit Tim17, putative, expressed	AT4G16160.2	Mitochondrial import inner membrane translocase subunit Tim17/Tim22/Tim23 family protein
B.E	Pavir.J11885.1.p|PACid:30190130	Pavir.J11885.1	0.37934677	-1.261000822	0.000325	30190130	Pavir.J11885.1	LOC_Os02g41860.4	aquaporin protein, putative, expressed	AT2G37170.1	plasma membrane intrinsic protein 2
B.E	Pavir.J12532.1.p|PACid:30245869	Pavir.J12532.1	2.51322429	1.466949426	3.46e-06	30245869	Pavir.J12532.1	LOC_Os01g71060.1	xylanase inhibitor, putative, expressed	AT1G03220.1	Eukaryotic aspartyl protease family protein
B.E	Pavir.J13364.1.p|PACid:30256564	Pavir.J13364.1	4.56608284	2.328367034	0.000727
B.E	Pavir.J13410.1.p|PACid:30208196	Pavir.J13410.1	2.28777483	1.331355061	0.002466	30208196	Pavir.J13410.1	LOC_Os07g48460.1	stress responsive protein, putative, expressed	AT2G39050.1	hydroxyproline-rich glycoprotein family protein
B.E	Pavir.J15194.1.p|PACid:30216067	Pavir.J15194.1	3.03638717	1.739765759	0.01002	30216067	Pavir.J15194.1	LOC_Os01g40550.1	hsp20/alpha crystallin family protein, putative, expressed	AT3G10680.1	HSP20-like chaperones superfamily protein
B.E	Pavir.J15860.1.p|PACid:30275456	Pavir.J15860.1	4.78504609	2.395942821	0.01853	30275456	Pavir.J15860.1	LOC_Os05g39690.1	oxidoreductase, aldo/keto reductase family protein, putative, expressed	AT2G37770.2	NAD(P)-linked oxidoreductase superfamily protein
B.E	Pavir.J16866.1.p|PACid:30294626	Pavir.J16866.1	0.35958193	-1.33819757	0.00792	30294626	Pavir.J16866.1	LOC_Os08g33370.1	14-3-3 protein, putative, expressed	AT3G02520.1	general regulatory factor 7
B.E	Pavir.J16984.1.p|PACid:30307708	Pavir.J16984.1	0.27683804	-1.715475907	0.016699	30307708	Pavir.J16984.1	LOC_Os03g28400.1	transport protein particle component, Bet3, domain containing protein, expressed	AT5G54750.1	Transport protein particle (TRAPP) component
B.E	Pavir.J18194.1.p|PACid:30255395	Pavir.J18194.1	3.80753031	2.066265522	0.01203	30255395	Pavir.J18194.1	LOC_Os02g33390.1	pectinesterase inhibitor domain containing protein, putative, expressed	AT5G46940.1	Plant invertase/pectin methylesterase inhibitor superfamily protein
B.E	Pavir.J19751.1.p|PACid:30274240	Pavir.J19751.1	3.85653808	2.084716357	0.000513	30274240	Pavir.J19751.1	LOC_Os11g44810.1	auxin-repressed protein, putative, expressed	AT1G28330.1	dormancy-associated protein-like 1
B.E	Pavir.J19824.1.p|PACid:30189354	Pavir.J19824.1	3.73001985	2.036593309	0.001139	30189354	Pavir.J19824.1	LOC_Os01g04360.1	hsp20/alpha crystallin family protein, putative, expressed	AT5G59720.1	heat shock protein 18.2
B.E	Pavir.J20172.1.p|PACid:30266975	Pavir.J20172.1	2.31969991	1.35134818	0.000937	30266975	Pavir.J20172.1	LOC_Os09g29200.1	glutathione S-transferase, putative, expressed	AT3G09270.1	glutathione S-transferase TAU 8
B.E	Pavir.J20242.1.p|PACid:30185156	Pavir.J20242.1	3.9631994	2.124075555	0.000643	30185156	Pavir.J20242.1	LOC_Os05g48330.1	aspartyl protease family protein, putative, expressed	AT3G12700.2	Eukaryotic aspartyl protease family protein
B.E	Pavir.J20981.1.p|PACid:30246326	Pavir.J20981.1	7.23085104	2.991575457	0.011618
B.E	Pavir.J21027.1.p|PACid:30247869	Pavir.J21027.1	4.59983381	2.338991739	0.001941
B.E	Pavir.J21349.1.p|PACid:30225604	Pavir.J21349.1	6.11544094	2.749866525	0.015883	30225604	Pavir.J21349.1	LOC_Os02g54140.1	hsp20/alpha crystallin family protein, putative, expressed	AT1G54050.1	HSP20-like chaperones superfamily protein
B.E	Pavir.J21738.1.p|PACid:30197325	Pavir.J21738.1	2.62520022	1.52983746	0.001258
B.E	Pavir.J22194.1.p|PACid:30244350	Pavir.J22194.1.	2.1421908	1.236496986	0.000223
B.E	Pavir.J22241.1.p|PACid:30302017	Pavir.J22241.1	4.06496028	2.160651255	0.02476	30302017	Pavir.J22241.1	LOC_Os08g44250.1	fiber protein Fb14, putative, expressed	AT3G62790.1	NADH-ubiquinone oxidoreductase-related
B.E	Pavir.J22570.1.p|PACid:30308575	Pavir.J22570.1	3.19188126	1.811816982	0.008784	30308575	Pavir.J22570.1	LOC_Os01g49720.1	glutathione S-transferase, putative, expressed	AT1G10360.1	glutathione S-transferase TAU 18
B.E	Pavir.J24083.1.p|PACid:30202376	Pavir.J24083.1	0.33940214	-1.421522421	0.004774	30202376	Pavir.J24083.1	LOC_Os10g29470.1	dehydrogenase, putative, expressed	AT4G37990.1	elicitor-activated gene 3-2
B.E	Pavir.J24136.1.p|PACid:30306717	Pavir.J24136.1	2.35458421	1.372882318	0.008713	30306717	Pavir.J24136.1	LOC_Os05g02530.1	glutathione S-transferase, N-terminal domain containing protein, expressed	AT1G75270.1	dehydroascorbate reductase 2
B.E	Pavir.J24201.1.p|PACid:30188906	Pavir.J24201.1	0.38125273	-1.253770444	0.015489	30188906	Pavir.J24201.1	LOC_Os03g25360.1	peroxidase precursor, putative, expressed	AT5G42180.1	Peroxidase superfamily protein
B.E	Pavir.J24812.1.p|PACid:30294359	Pavir.J24812.1	2.15773602	1.246928375	0.009508	30294359	Pavir.J24812.1	LOC_Os03g27310.1	histone H3, putative, expressed	AT4G40030.2	Histone superfamily protein
B.E	Pavir.J24821.1.p|PACid:30277014	Pavir.J24821.1	4.66361046	2.358857288	5.62e-05	30277014	Pavir.J24821.1	LOC_Os01g50910.1	late embryogenesis abundant protein, group 3, putative, expressed	AT1G52690.1	Late embryogenesis abundant protein (LEA) family protein
B.E	Pavir.J25726.1.p|PACid:30194791	Pavir.J25726.1	3.03778117	1.74042795	0.021592
B.E	Pavir.J28355.1.p|PACid:30287092	Pavir.J28355.1	0.38921032	-1.223968139	0.01647	30287092	Pavir.J28355.1	LOC_Os11g43900.1	translationally-controlled tumor protein, putative, expressed	AT3G05540.1	Methionine sulfoxide reductase (MSS4-like) family protein
B.E	Pavir.J28528.1.p|PACid:30277792	Pavir.J28528.1	2.12641203	1.225831173	0.012959
B.E	Pavir.J28620.1.p|PACid:30314458	Pavir.J28620.1	2.13201027	1.229624389	0.003887	30314458	Pavir.J28620.1	LOC_Os06g25010.1	glycosyl hydrolase, putative, expressed	AT5G24090.1	chitinase A
B.E	Pavir.J29514.1.p|PACid:30196199	Pavir.J29514.1	2.82402046	1.635160539	0.0238	30196199	Pavir.J29514.1	LOC_Os02g12610.1	hsp20/alpha crystallin family protein, putative, expressed	AT5G12030.1	heat shock protein 17.6A
B.E	Pavir.J31110.1.p|PACid:30201037	Pavir.J31110.1	3.48662516	1.93924127	0.01762
B.E	Pavir.J31192.1.p|PACid:30274917	Pavir.J31192.1	0.37394123	-1.28170653	0.002663	30274917	Pavir.J31192.1	LOC_Os07g08710.1	AT hook-containing DNA-binding protein, putative, expressed	AT1G06760.1	winged-helix DNA-binding transcription factor family protein
B.E	Pavir.J33685.1.p|PACid:30190217	Pavir.J33685.1	3.61383777	1.990941743	0.015947	30190217	Pavir.J33685.1	LOC_Os07g48500.1	stress responsive protein, putative, expressed	AT2G39050.1	hydroxyproline-rich glycoprotein family protein
B.E	Pavir.J36542.1.p|PACid:30207798	Pavir.J36542.1	2.43213044	1.419630603	0.012707	30207798	Pavir.J36542.1	LOC_Os01g71080.1	xylanase inhibitor, putative, expressed	AT1G03230.1	Eukaryotic aspartyl protease family protein
B.E	Pavir.J36772.1.p|PACid:30203019	Pavir.J36772.1	6.30408611	2.793697242	0.018513	30203019	Pavir.J36772.1	LOC_Os04g09390.1	HEV3 - Hevein family protein precursor, expressed	AT3G04720.1	pathogenesis-related 4
B.E	Pavir.J37309.1.p|PACid:30271745	Pavir.J37309.1	3.1776137	1.805353746	0.000122	30271745	Pavir.J37309.1	LOC_Os01g55950.1	acetamidase, putative, expressed	AT4G37560.1	Acetamidase/Formamidase family protein
B.E	Pavir.J37362.1.p|PACid:30294839	Pavir.J37362.1	2.65545176	1.546367324	0.009961	30294839	Pavir.J37362.1	LOC_Os05g44340.1	heat shock protein 101, putative, expressed	AT1G74310.1	heat shock protein 101
B.E	Pavir.J37823.1.p|PACid:30199614	Pavir.J37823.1	0.35989775	-1.336931006	0.00113	30199614	Pavir.J37823.1	LOC_Os08g39140.1	heat shock protein, putative, expressed	AT5G56030.1	heat shock protein 81-2
B.E	Pavir.J37948.1.p|PACid:30271721	Pavir.J37948.1	2.35727846	1.37453219	0.001217	30271721	Pavir.J37948.1	LOC_Os01g48280.1	ubiquitin-conjugating enzyme, putative, expressed	AT1G16890.2	ubiquitin-conjugating enzyme 36
B.E	Pavir.J38164.1.p|PACid:30306766	Pavir.J38164.1	0.21891063	-2.054176083	0.00073	30306766	Pavir.J38164.1	LOC_Os03g17350.1	white-brown complex homolog protein, putative, expressed	AT3G55090.1	ABC-2 type transporter family protein
B.E	Pavir.J38252.1.p|PACid:30191144	Pavir.J38252.1	10.3894782	3.514461294	0.00223	30191144	Pavir.J38252.1	LOC_Os01g58194.1	protein disulfide isomerase, putative, expressed	AT1G60420.1	DC1 domain-containing protein
B.E	Pavir.J38942.1.p|PACid:30276533	Pavir.J38942.1	2.35759081	1.374723344	0.046731	30276533	Pavir.J38942.1	LOC_Os03g11910.1	DnaK family protein, putative, expressed	AT2G32120.1	heat-shock protein 70T-2
B.E	Pavir.J40233.1.p|PACid:30244149	Pavir.J40233.1	3.10016746	1.769756145	0.010785
B.RT	Pavir.Aa00045.1.p|PACid:30253976	Pavir.Aa00045.1	2.712865	1.43981736	0.001274
B.RT	Pavir.Aa00441.1.p|PACid:30252765	Pavir.Aa00441.1	2.475508	1.307724784	0.002477	30252765	Pavir.Aa00441.1	LOC_Os02g49850.1	plastocyanin-like domain containing protein, putative, expressed	AT2G02850.1	plantacyanin
B.RT	Pavir.Aa00731.1.p|PACid:30253689	Pavir.Aa00731.1	11.10243	3.472803806	0.007395
B.RT	Pavir.Aa00841.1.p|PACid:30252973	Pavir.Aa00841.1	2.528888	1.338503066	0.002411	30252973	Pavir.Aa00841.1	LOC_Os02g44108.1	expansin precursor, putative, expressed	AT2G45110.1	expansin B4
B.RT	Pavir.Ab03099.1.p|PACid:30236611	Pavir.Ab03099.1	2.2375	1.161887551	0.046291	30236611	Pavir.Ab03099.1	LOC_Os02g48140.1	hsp20/alpha crystallin family protein, putative, expressed	AT3G46230.1	heat shock protein 17.4
B.RT	Pavir.Ba00161.1.p|PACid:30293348	Pavir.Ba00161.1	2.234587	1.160008235	0.001283	30293348	Pavir.Ba00161.1	LOC_Os07g47510.1	stress-related protein, putative, expressed	AT3G05500.1	Rubber elongation factor protein (REF)
B.RT	Pavir.Ba00326.1.p|PACid:30291073	Pavir.Ba00326.1	2.533735	1.341265758	0.017491	30291073	Pavir.Ba00326.1	LOC_Os07g48500.1	stress responsive protein, putative, expressed	AT2G39050.1	hydroxyproline-rich glycoprotein family protein
B.RT	Pavir.Ba00708.1.p|PACid:30290880	Pavir.Ba00708.1	2.358618	1.237941624	0.005784	30290880	Pavir.Ba00708.1	LOC_Os07g36470.1	vacuolar ATP synthase subunit H, putative, expressed	AT3G42050.1	vacuolar ATP synthase subunit H family protein
B.RT	Pavir.Ba01216.1.p|PACid:30291840	Pavir.Ba01216.1	7.341102	2.875996641	0.001952	30291840	Pavir.Ba01216.1	LOC_Os09g36680.1	ribonuclease T2 family domain containing protein, expressed	AT1G14220.1	Ribonuclease T2 family protein
B.RT	Pavir.Ba02586.1.p|PACid:30292389	Pavir.Ba02586.1	4.030894	2.011099793	0.000484	30292389	Pavir.Ba02586.1	LOC_Os09g02270.1	cyclase family protein, putative, expressed	AT4G34180.1	Cyclase family protein
B.RT	Pavir.Ba02673.1.p|PACid:30290867	Pavir.Ba02673.1	2.532647	1.340645957	0.01944	30290867	Pavir.Ba02673.1	LOC_Os09g39730.1	Core histone H2A/H2B/H3/H4 domain containing protein, putative, expressed	AT1G08170.1	Histone superfamily protein
B.RT	Pavir.Ba02709.1.p|PACid:30289357	Pavir.Ba02709.1	0.448803	-1.155844278	0.009361
B.RT	Pavir.Ba03292.1.p|PACid:30293880	Pavir.Ba03292.1	0.402553	-1.312747629	0.000546	30293880	Pavir.Ba03292.1	LOC_Os10g02720.1	OsWAK99 - OsWAK receptor-like protein kinase, expressed	AT1G16090.1	wall associated kinase-like 7
B.RT	Pavir.Bb00623.1.p|PACid:30299462	Pavir.Bb00623.1.	2.242963	1.165406061	0.000823
B.RT	Pavir.Bb00666.1.p|PACid:30301397	Pavir.Bb00666.1	2.503473	1.323931024	0.000265	30301397	Pavir.Bb00666.1	LOC_Os07g10190.1	glucosyltransferase, putative, expressed	AT5G49690.1	UDP-Glycosyltransferase superfamily protein
B.RT	Pavir.Bb00826.1.p|PACid:30301666	Pavir.Bb00826.1	0.350241	-1.513580212	0.004855
B.RT	Pavir.Bb02402.1.p|PACid:30297818	Pavir.Bb02402.1	2.354635	1.235503573	0.006553	30297818	Pavir.Bb02402.1	LOC_Os09g29490.1	peroxidase precursor, putative, expressed	AT2G22420.1	Peroxidase superfamily protein
B.RT	Pavir.Bb02900.1.p|PACid:30301417	Pavir.Bb02900.1	2.481622	1.311283664	0.005305	30301417	Pavir.Bb02900.1	LOC_Os07g36470.1	vacuolar ATP synthase subunit H, putative, expressed	AT3G42050.1	vacuolar ATP synthase subunit H family protein
B.RT	Pavir.Bb03606.1.p|PACid:30300086	Pavir.Bb03606.1	6.312856	2.65829288	0.005477
B.RT	Pavir.Ca00112.1.p|PACid:30204323	Pavir.Ca00112.1	2.894453	1.533290905	0.009706
B.RT	Pavir.Ca00776.1.p|PACid:30206984	Pavir.Ca00776.1	2.65401	1.408174002	0.000444	30206984	Pavir.Ca00776.1	LOC_Os05g04380.1	peroxidase precursor, putative, expressed	AT4G33420.1	Peroxidase superfamily protein
B.RT	Pavir.Ca01173.1.p|PACid:30206432	Pavir.Ca01173.1	2.863819	1.517940551	0.001474	30206432	Pavir.Ca01173.1	LOC_Os05g05940.1	stress-related protein, putative, expressed	AT3G05500.1	Rubber elongation factor protein (REF)
B.RT	Pavir.Ca01745.2.p|PACid:30204063	Pavir.Ca01745.2	2.239854	1.163404659	0.003947	30204063	Pavir.Ca01745.2	LOC_Os12g40440.1	expressed protein	AT5G62530.1	aldehyde dehydrogenase 12A1
B.RT	Pavir.Ca01834.1.p|PACid:30206793	Pavir.Ca01834.1	2.409462	1.268711114	0.012208	30206793	Pavir.Ca01834.1	LOC_Os05g47700.1	LTPL152 - Protease inhibitor/seed storage/LTP family protein precursor, expressed	AT3G18280.1	Bifunctional inhibitor/lipid-transfer protein/seed storage 2S albumin superfamily protein
B.RT	Pavir.Ca02217.1.p|PACid:30206046	Pavir.Ca02217.1	4.089767	2.032018812	0.001983	30206046	Pavir.Ca02217.1	LOC_Os12g29550.1	expressed protein	AT3G19340.1	Protein of unknown function (DUF3754)
B.RT	Pavir.Cb00570.1.p|PACid:30269177	Pavir.Cb00570.1	0.422984	-1.241323332	0.015936
B.RT	Pavir.Cb00604.1.p|PACid:30269483	Pavir.Cb00604.1	2.311289	1.208697745	0.000604	30269483	Pavir.Cb00604.1	LOC_Os12g36640.2	universal stress protein domain containing protein, putative, expressed	AT2G47710.1	Adenine nucleotide alpha hydrolases-like superfamily protein
B.RT	Pavir.Cb01473.1.p|PACid:30269358	Pavir.Cb01473.1	2.283049	1.19096156	0.001555	30269358	Pavir.Cb01473.1	LOC_Os05g28040.1	DUF640 domain containing protein, putative, expressed	AT1G07090.1	Protein of unknown function (DUF640)
B.RT	Pavir.Cb02016.1.p|PACid:30269437	Pavir.Cb02016.1	0.439482	-1.186122969	0.013596	30269437	Pavir.Cb02016.1	LOC_Os12g06850.1	transcription elongation factor protein, putative, expressed	AT5G09850.1	Transcription elongation factor (TFIIS) family protein
B.RT	Pavir.Da00332.1.p|PACid:30193392	Pavir.Da00332.1	2.938866	1.555259529	0.001953	30193392	Pavir.Da00332.1	LOC_Os06g17840.1	expressed protein	AT5G47690.3	binding
B.RT	Pavir.Da01109.1.p|PACid:30192598	Pavir.Da01109.1	2.429489	1.280652677	0.01027	30192598	Pavir.Da01109.1	LOC_Os06g29180.1	erythronate-4-phosphate dehydrogenase domain containing protein, expressed	AT5G14780.1	formate dehydrogenase
B.RT	Pavir.Da01122.1.p|PACid:30191500	Pavir.Da01122.1	0.442999	-1.174623529	0.02157	30191500	Pavir.Da01122.1	LOC_Os12g33950.1	MYB family transcription factor, putative, expressed	AT2G21650.1	Homeodomain-like superfamily protein
B.RT	Pavir.Da02334.1.p|PACid:30193518	Pavir.Da02334.1	2.517312	1.331883864	0.011691	30193518	Pavir.Da02334.1	LOC_Os06g04380.1	aminomethyltransferase, putative, expressed	AT4G12130.1	Glycine cleavage T-protein family
B.RT	Pavir.Db00124.1.p|PACid:30261430	Pavir.Db00124.1	12.43996	3.63690963	0.01289
B.RT	Pavir.Db00310.1.p|PACid:30260397	Pavir.Db00310.1	0.422779	-1.24202445	0.04048	30260397	Pavir.Db00310.1	LOC_Os04g57440.1	oryzain beta chain precursor, putative, expressed	AT5G43060.1	Granulin repeat cysteine protease family protein
B.RT	Pavir.Db00653.1.p|PACid:30262041	Pavir.Db00653.1	2.743591	1.456065427	0.000687	30262041	Pavir.Db00653.1	LOC_Os07g34570.1	FAD dependent oxidoreductase domain containing protein, expressed	AT5G54770.1	thiazole biosynthetic enzyme, chloroplast (ARA6) (THI1) (THI4)
B.RT	Pavir.Db00968.1.p|PACid:30261483	Pavir.Db00968.1	2.646714	1.404202309	0.001419	30261483	Pavir.Db00968.1	LOC_Os04g18200.1	dihydrodipicolinate synthase, chloroplast precursor, putative, expressed	AT3G60880.1	dihydrodipicolinate synthase 1
B.RT	Pavir.Ea00105.1.p|PACid:30227246	Pavir.Ea00105.1	4.922148	2.299288095	0.016846	30227246	Pavir.Ea00105.1	LOC_Os01g12580.1	late embryogenesis abundant protein, putative, expressed	AT1G01470.1	Late embryogenesis abundant protein
B.RT	Pavir.Ea00289.1.p|PACid:30226451	Pavir.Ea00289.1	2.651878	1.407014218	0.02131	30226451	Pavir.Ea00289.1	LOC_Os01g08860.1	hsp20/alpha crystallin family protein, putative, expressed	AT5G12020.1	17.6 kDa class II heat shock protein
B.RT	Pavir.Ea02542.1.p|PACid:30227863	Pavir.Ea02542.1	5.857916	2.550387436	0.009301	30227863	Pavir.Ea02542.1	LOC_Os01g50700.1	dehydrin family protein, expressed	AT2G21490.1	dehydrin LEA
B.RT	Pavir.Ea02626.1.p|PACid:30225983	Pavir.Ea02626.1	3.027388	1.598073496	0.002132	30225983	Pavir.Ea02626.1	LOC_Os01g51870.1	methyltransferase, putative, expressed	AT5G10830.1	S-adenosyl-L-methionine-dependent methyltransferases superfamily protein
B.RT	Pavir.Ea03024.1.p|PACid:30231561	Pavir.Ea03024.1	6.255601	2.645148385	8.8e-06	30231561	Pavir.Ea03024.1	LOC_Os12g43490.1	thaumatin, putative, expressed	AT4G11650.1	osmotin 34
B.RT	Pavir.Ea03201.1.p|PACid:30229441	Pavir.Ea03201.1	2.833429	1.502548798	0.007723	30229441	Pavir.Ea03201.1	LOC_Os05g49440.2	DUF1264 domain containing protein, putative, expressed	AT2G31985.1	Protein of unknown function (DUF1264)
B.RT	Pavir.Ea03968.1.p|PACid:30226281	Pavir.Ea03968.1	0.449297	-1.154258475	0.037992	30226281	Pavir.Ea03968.1	LOC_Os01g70890.1	histone-like transcription factor and archaeal histone, putative, expressed	AT2G47810.1	nuclear factor Y, subunit B5
B.RT	Pavir.Eb00253.1.p|PACid:30313746	Pavir.Eb00253.1	0.433307	-1.20653831	0.000618	30313746	Pavir.Eb00253.1	LOC_Os01g09620.1	zinc finger/CCCH transcription factor, putative, expressed	AT2G19810.1	CCCH-type zinc finger family protein
B.RT	Pavir.Eb01487.1.p|PACid:30312900	Pavir.Eb01487.1	2.809448	1.490286716	0.000296	30312900	Pavir.Eb01487.1	LOC_Os01g27360.1	glutathione S-transferase, putative, expressed	AT3G62760.1	Glutathione S-transferase family protein
B.RT	Pavir.Eb01891.1.p|PACid:30309685	Pavir.Eb01891.1	2.406596	1.266993907	0.002575
B.RT	Pavir.Eb02573.1.p|PACid:30311809	Pavir.Eb02573.1	0.229088	-2.126028139	0.038174
B.RT	Pavir.Eb03270.1.p|PACid:30311326	Pavir.Eb03270.1	0.375637	-1.412588316	0.018442	30311326	Pavir.Eb03270.1	LOC_Os01g56100.1	BSD domain containing protein, expressed	AT5G65910.1	BSD domain-containing protein
B.RT	Pavir.Fa00184.1.p|PACid:30185480	Pavir.Fa00184.1	2.589617	1.372738498	0.000787	30185480	Pavir.Fa00184.1	LOC_Os08g44360.1	male sterility protein 2, putative, expressed	AT4G33790.1	Jojoba acyl CoA reductase-related male sterility protein
B.RT	Pavir.Fa00806.1.p|PACid:30186240	Pavir.Fa00806.1	2.599875	1.378442505	0.012858	30186240	Pavir.Fa00806.1	LOC_Os08g35160.1	heat shock protein DnaJ, putative, expressed	AT3G14200.1	Chaperone DnaJ-domain superfamily protein
B.RT	Pavir.Fa01398.1.p|PACid:30187564	Pavir.Fa01398.1	3.242329	1.697030511	0.003564	30187564	Pavir.Fa01398.1	LOC_Os08g25734.1	glucose-1-phosphate adenylyltransferase large subunit, chloroplast precursor, putative, expressed	AT5G48300.1	ADP glucose pyrophosphorylase 1
B.RT	Pavir.Fa01476.1.p|PACid:30186955	Pavir.Fa01476.1	2.247866	1.168556173	0.038044	30186955	Pavir.Fa01476.1	LOC_Os03g14180.1	hsp20/alpha crystallin family protein, putative, expressed	AT4G27670.1	heat shock protein 21
B.RT	Pavir.Ga01132.1.p|PACid:30306045	Pavir.Ga01132.1	4.30795	2.107001418	0.003027	30306045	Pavir.Ga01132.1	LOC_Os04g49980.1	late embryogenesis abundant group 1, putative, expressed	AT2G35300.1	Late embryogenesis abundant protein, group 1 protein
B.RT	Pavir.Ga01381.1.p|PACid:30305691	Pavir.Ga01381.1	3.001413	1.585641762	0.006258	30305691	Pavir.Ga01381.1	LOC_Os04g41580.1	glycine-rich protein, putative, expressed	AT3G59640.1	glycine-rich protein
B.RT	Pavir.Ga02291.1.p|PACid:30304813	Pavir.Ga02291.1	2.37389	1.247253313	0.007764	30304813	Pavir.Ga02291.1	LOC_Os04g27980.1	glycosyl hydrolase, putative, expressed	AT5G24090.1	chitinase A
B.RT	Pavir.Ga02521.1.p|PACid:30303335	Pavir.Ga02521.1	2.833572	1.502621918	0.031298	30303335	Pavir.Ga02521.1	LOC_Os04g26910.1	oxidoreductase, aldo/keto reductase family protein, putative, expressed	AT1G60710.1	NAD(P)-linked oxidoreductase superfamily protein
B.RT	Pavir.Gb00671.1.p|PACid:30224537	Pavir.Gb00671.1	2.428558	1.280099802	0.00934	30224537	Pavir.Gb00671.1	LOC_Os02g41860.3	aquaporin protein, putative, expressed	AT5G60660.1	plasma membrane intrinsic protein 2;4
B.RT	Pavir.Ha00023.1.p|PACid:30316909	Pavir.Ha00023.1	0.387967	-1.365994471	0.006786	30316909	Pavir.Ha00023.1	LOC_Os03g21940.1	60S ribosomal protein L19-3, putative, expressed	AT1G02780.1	Ribosomal protein L19e family protein
B.RT	Pavir.Ha01909.1.p|PACid:30318209	Pavir.Ha01909.1	3.63736	1.862891867	0.018029	30318209	Pavir.Ha01909.1	LOC_Os11g03730.1	alpha-N-arabinofuranosidase A, putative, expressed	AT3G10740.1	alpha-L-arabinofuranosidase 1
B.RT	Pavir.Ia00055.1.p|PACid:30211874	Pavir.Ia00055.1	2.244432	1.166350339	0.000294
B.RT	Pavir.Ia00908.1.p|PACid:30214178	Pavir.Ia00908.1	3.094047	1.629495211	8.55e-05	30214178	Pavir.Ia00908.1	LOC_Os03g51240.1	glycosyl hydrolases family 17, putative, expressed	AT5G42720.1	Glycosyl hydrolase family 17 protein
B.RT	Pavir.Ia02656.1.p|PACid:30213207	Pavir.Ia02656.1	2.288033	1.194107613	0.003444	30213207	Pavir.Ia02656.1	LOC_Os10g07200.1	hsp20/alpha crystallin family protein, putative, expressed	AT4G27670.1	heat shock protein 21
B.RT	Pavir.Ia02771.1.p|PACid:30212791	Pavir.Ia02771.1	2.779196	1.474667594	0.000368	30212791	Pavir.Ia02771.1	LOC_Os10g09850.1	EF hand family protein, putative, expressed	AT4G38810.2	Calcium-binding EF-hand family protein
B.RT	Pavir.Ia03723.1.p|PACid:30215975	Pavir.Ia03723.1	2.449409	1.292433742	0.000168	30215975	Pavir.Ia03723.1	LOC_Os04g55730.1	alpha-N-acetylglucosaminidase, putative, expressed	AT5G13690.1	alpha-N-acetylglucosaminidase family / NAGLU family
B.RT	Pavir.Ia04222.1.p|PACid:30209404	Pavir.Ia04222.1	2.656939	1.409765013	0.00029	30209404	Pavir.Ia04222.1	LOC_Os02g20940.1	CHCH domain containing protein, expressed	AT1G69750.1	cytochrome c oxidase 19-2
B.RT	Pavir.Ia04860.1.p|PACid:30210096	Pavir.Ia04860.1	2.775027	1.472501986	0.001015	30210096	Pavir.Ia04860.1	LOC_Os03g04240.1	glutathione S-transferase, putative, expressed	AT2G47730.1	glutathione S-transferase phi 8
B.RT	Pavir.Ib00038.1.p|PACid:30238568	Pavir.Ib00038.1	3.259266	1.704547138	0.003902	30238568	Pavir.Ib00038.1	LOC_Os03g02780.1	Core histone H2A/H2B/H3/H4 domain containing protein, putative, expressed	AT3G53730.1	Histone superfamily protein
B.RT	Pavir.Ib00396.1.p|PACid:30236817	Pavir.Ib00396.1	2.876771	1.524450626	0.000314	30236817	Pavir.Ib00396.1	LOC_Os03g06670.1	Core histone H2A/H2B/H3/H4 domain containing protein, putative, expressed	AT3G54560.1	histone H2A 11
B.RT	Pavir.Ib01188.1.p|PACid:30238826	Pavir.Ib01188.1	2.297496	1.200062489	0.003743	30238826	Pavir.Ib01188.1	LOC_Os03g15240.1	expressed protein	AT5G16060.1	Cytochrome c oxidase biogenesis protein Cmc1-like
B.RT	Pavir.Ib01315.1.p|PACid:30241588	Pavir.Ib01315.1	2.698184	1.431988984	0.004671	30241588	Pavir.Ib01315.1	LOC_Os03g17470.1	IN2-1 protein, putative, expressed	AT3G55040.1	glutathione transferase lambda 2
B.RT	Pavir.Ib01375.1.p|PACid:30239296	Pavir.Ib01375.1	2.879843	1.525990004	0.000333	30239296	Pavir.Ib01375.1	LOC_Os03g18420.1	CHCH domain containing protein, expressed	AT3G06310.1	Cox19-like CHCH family protein
B.RT	Pavir.Ib01670.1.p|PACid:30237750	Pavir.Ib01670.1	2.885854	1.52899855	0.001677	30237750	Pavir.Ib01670.1	LOC_Os03g22810.1	copper/zinc superoxide dismutase, putative, expressed	AT1G08830.1	copper/zinc superoxide dismutase 1
B.RT	Pavir.Ib01764.1.p|PACid:30241518	Pavir.Ib01764.1	2.238516	1.162542333	0.000575	30241518	Pavir.Ib01764.1	LOC_Os03g25390.1	novel plant SNARE 11, putative, expressed	AT3G17440.1	novel plant snare 13
B.RT	Pavir.Ib02075.1.p|PACid:30240422	Pavir.Ib02075.1	2.210062	1.144087077	0.000729	30240422	Pavir.Ib02075.1	LOC_Os03g31300.1	chaperone protein clpB 1, putative, expressed	AT5G15450.1	casein lytic proteinase B3
B.RT	Pavir.Ib02490.1.p|PACid:30238982	Pavir.Ib02490.1	3.171761	1.665284251	0.010334	30238982	Pavir.Ib02490.1	LOC_Os10g38340.1	glutathione S-transferase GSTU6, putative, expressed	AT1G10360.1	glutathione S-transferase TAU 18
B.RT	Pavir.Ib02545.1.p|PACid:30238813	Pavir.Ib02545.1	2.856603	1.514300704	0.023533	30238813	Pavir.Ib02545.1	LOC_Os10g38140.1	glutathione S-transferase, putative, expressed	AT1G10370.1	Glutathione S-transferase family protein
B.RT	Pavir.Ib02744.1.p|PACid:30237056	Pavir.Ib02744.1	2.311938	1.209102755	0.010425	30237056	Pavir.Ib02744.1	LOC_Os10g07200.1	hsp20/alpha crystallin family protein, putative, expressed	AT4G27670.1	heat shock protein 21
B.RT	Pavir.Ib03699.1.p|PACid:30237185	Pavir.Ib03699.1	2.299466	1.201298666	0.00176	30237185	Pavir.Ib03699.1	LOC_Os10g36760.1	OsProCP3 - Putative Lysosomal Pro-x Carboxypeptidase homologue, expressed	AT4G36195.1	Serine carboxypeptidase S28 family protein
B.RT	Pavir.Ib04161.1.p|PACid:30238734	Pavir.Ib04161.1	2.583762	1.369473222	0.005136	30238734	Pavir.Ib04161.1	LOC_Os03g45340.1	hsp20/alpha crystallin family protein, putative, expressed	AT5G04890.1	HSP20-like chaperones superfamily protein
B.RT	Pavir.J00826.1.p|PACid:30273962	Pavir.J00826.1	0.4395	-1.18606371	0.001107	30273962	Pavir.J00826.1	LOC_Os03g13180.1	peroxidase precursor, putative, expressed	AT5G06730.1	Peroxidase superfamily protein
B.RT	Pavir.J01005.1.p|PACid:30220131	Pavir.J01005.1	2.265502	1.17983095	0.011389	30220131	Pavir.J01005.1	LOC_Os01g64650.1	VAMP-like protein YKT62, putative, expressed	AT5G58060.1	SNARE-like superfamily protein
B.RT	Pavir.J04349.1.p|PACid:30285557	Pavir.J04349.1	2.673977	1.418986833	0.003381	30285557	Pavir.J04349.1	LOC_Os03g57690.1	aldehyde oxidase, putative, expressed	AT5G20960.1	aldehyde oxidase 1
B.RT	Pavir.J04821.1.p|PACid:30276336	Pavir.J04821.1	2.896649	1.534385076	0.023995
B.RT	Pavir.J04987.1.p|PACid:30196621	Pavir.J04987.1	2.263796	1.178744057	0.001888	30196621	Pavir.J04987.1	LOC_Os05g33130.1	CHIT17 - Chitinase family protein precursor, expressed	AT3G12500.1	basic chitinase
B.RT	Pavir.J05274.1.p|PACid:30201830	Pavir.J05274.1	2.7361	1.452121053	0.01892
B.RT	Pavir.J05608.1.p|PACid:30307209	Pavir.J05608.1	2.59933	1.37813979	0.035331
B.RT	Pavir.J05995.1.p|PACid:30271351	Pavir.J05995.1.	2.940501	1.556061961	0.00963
B.RT	Pavir.J06234.1.p|PACid:30307099	Pavir.J06234.1	2.207932	1.142695915	0.001013	30307099	Pavir.J06234.1	LOC_Os06g29180.1	erythronate-4-phosphate dehydrogenase domain containing protein, expressed	AT5G14780.1	formate dehydrogenase
B.RT	Pavir.J06478.1.p|PACid:30245113	Pavir.J06478.1	0.420776	-1.24887466	0.031099	30245113	Pavir.J06478.1	LOC_Os03g52320.1	GRF-interacting factor 1, putative, expressed	AT5G28640.1	SSXT family protein
B.RT	Pavir.J07119.1.p|PACid:30283861	Pavir.J07119.1	2.515592	1.330897993	0.005362	30283861	Pavir.J07119.1	LOC_Os01g12580.1	late embryogenesis abundant protein, putative, expressed	AT1G01470.1	Late embryogenesis abundant protein
B.RT	Pavir.J08147.1.p|PACid:30199544	Pavir.J08147.1	2.617087	1.387961874	0.004107	30199544	Pavir.J08147.1	LOC_Os06g02780.1	aspartic protease, putative, expressed	AT5G10770.1	Eukaryotic aspartyl protease family protein
B.RT	Pavir.J08778.1.p|PACid:30271912	Pavir.J08778.1	0.344606	-1.53697971	0.017641	30271912	Pavir.J08778.1	LOC_Os05g37060.1	MYB family transcription factor, putative, expressed	AT1G49010.1	Duplicated homeodomain-like superfamily protein
B.RT	Pavir.J10550.1.p|PACid:30285869	Pavir.J10550.1	0.305161	-1.712357383	0.010209	30285869	Pavir.J10550.1	LOC_Os03g21940.1	60S ribosomal protein L19-3, putative, expressed	AT3G16780.1	Ribosomal protein L19e family protein
B.RT	Pavir.J11116.1.p|PACid:30277030	Pavir.J11116.1	0.427404	-1.226328575	0.005208	30277030	Pavir.J11116.1	LOC_Os06g03640.1	BAG domain containing protein, expressed	AT5G52060.1	BCL-2-associated athanogene 1
B.RT	Pavir.J13866.1.p|PACid:30286882	Pavir.J13866.1	2.311829	1.209034813	0.001533	30286882	Pavir.J13866.1	LOC_Os06g45710.1	phosphoglycerate kinase protein, putative, expressed	AT1G79550.1	phosphoglycerate kinase
B.RT	Pavir.J16711.1.p|PACid:30307668	Pavir.J16711.1	2.567965	1.360625726	0.043556	30307668	Pavir.J16711.1	LOC_Os01g52830.1	DUF1264 domain containing protein, putative, expressed	AT5G45690.1	Protein of unknown function (DUF1264)
B.RT	Pavir.J17207.1.p|PACid:30189725	Pavir.J17207.1	8.022981	3.004138414	0.01136
B.RT	Pavir.J17245.1.p|PACid:30295398	Pavir.J17245.1	0.242578	-2.043479919	0.004575	30295398	Pavir.J17245.1	LOC_Os05g50350.1	MYB family transcription factor, putative, expressed	AT1G75250.1	RAD-like 6
B.RT	Pavir.J18850.1.p|PACid:30199531	Pavir.J18850.1	2.290915	1.195924132	0.001778	30199531	Pavir.J18850.1	LOC_Os09g12660.1	glucose-1-phosphate adenylyltransferase large subunit, chloroplast precursor, putative, expressed	AT5G48300.1	ADP glucose pyrophosphorylase 1
B.RT	Pavir.J19551.1.p|PACid:30254888	Pavir.J19551.1	0.425468	-1.232877246	0.002887	30254888	Pavir.J19551.1	LOC_Os03g21940.1	60S ribosomal protein L19-3, putative, expressed	AT1G02780.1	Ribosomal protein L19e family protein
B.RT	Pavir.J20711.1.p|PACid:30273859	Pavir.J20711.1	2.343203	1.228482201	0.00459	30273859	Pavir.J20711.1	LOC_Os08g44450.1	L1P family of ribosomal proteins domain containing protein, expressed	AT1G08360.1	Ribosomal protein L1p/L10e family
B.RT	Pavir.J24463.1.p|PACid:30295856	Pavir.J24463.1	2.427548	1.279499741	0.005847	30295856	Pavir.J24463.1	LOC_Os05g25850.1	superoxide dismutase, mitochondrial precursor, putative, expressed	AT3G10920.1	manganese superoxide dismutase 1
B.RT	Pavir.J24493.1.p|PACid:30254586	Pavir.J24493.1	5.209787	2.381224449	0.00176
B.RT	Pavir.J25625.1.p|PACid:30286857	Pavir.J25625.1	0.39816	-1.32858086	0.004845	30286857	Pavir.J25625.1	LOC_Os04g41820.1	transcription factor RF2a, putative, expressed	AT1G06070.1	Basic-leucine zipper (bZIP) transcription factor family protein
B.RT	Pavir.J27516.1.p|PACid:30294035	Pavir.J27516.1	5.959236	2.575127359	0.011663	30294035	Pavir.J27516.1	LOC_Os03g06360.1	late embryogenesis abundant protein D-34, putative, expressed	AT3G22490.1	Seed maturation protein
B.RT	Pavir.J27771.1.p|PACid:30219066	Pavir.J27771.1	0.403775	-1.308376906	0.040565	30219066	Pavir.J27771.1	LOC_Os12g36830.1	pathogenesis-related Bet v I family protein, putative, expressed	AT1G70840.1	MLP-like protein 31
B.RT	Pavir.J32559.1.p|PACid:30247830	Pavir.J32559.1	0.419049	-1.25481038	0.001257	30247830	Pavir.J32559.1	LOC_Os03g30550.1	RNA-binding protein-like, putative, expressed	AT5G60980.2	Nuclear transport factor 2 (NTF2) family protein with RNA binding (RRM-RBD-RNP motifs) domain
B.RT	Pavir.J33361.1.p|PACid:30271597	Pavir.J33361.1	4.476545	2.162385829	0.000821	30271597	Pavir.J33361.1	LOC_Os02g02400.1	catalase isozyme A, putative, expressed	AT1G20630.1	catalase 1
B.RT	Pavir.J33609.1.p|PACid:30257266	Pavir.J33609.1	3.237839	1.695031262	3.35e-05	30257266	Pavir.J33609.1	LOC_Os08g09250.2	glyoxalase family protein, putative, expressed	AT1G67280.1	Glyoxalase/Bleomycin resistance protein/Dioxygenase superfamily protein
B.RT	Pavir.J35493.1.p|PACid:30247877	Pavir.J35493.1	0.429444	-1.219457256	0.014753
B.RT	Pavir.J36550.1.p|PACid:30286242	Pavir.J36550.1	2.647389	1.404570184	0.000682	30286242	Pavir.J36550.1	LOC_Os05g07890.1	embryo-specific 3, putative, expressed	AT2G41475.1	Embryo-specific protein 3, (ATS3)
B.RT	Pavir.J38392.1.p|PACid:30207790	Pavir.J38392.1	4.735016	2.243369437	0.003704	30207790	Pavir.J38392.1	LOC_Os01g28500.1	SCP-like extracellular protein, expressed	AT2G14610.1	pathogenesis-related gene 1
B.RT	Pavir.Aa00186.1.p|PACid:30249333	Pavir.Aa00186.1	2.253207	1.171980113	0.00306
B.RT	Pavir.Aa00282.1.p|PACid:30253178	Pavir.Aa00282.1	6.618923	2.726596401	0.003651	30253178	Pavir.Aa00282.1	LOC_Os02g54140.1	hsp20/alpha crystallin family protein, putative, expressed	AT1G54050.1	HSP20-like chaperones superfamily protein
B.RT	Pavir.Aa01476.1.p|PACid:30249309	Pavir.Aa01476.1	2.27102	1.183340617	0.00336	30249309	Pavir.Aa01476.1	LOC_Os02g37000.1	mitochondrial prohibitin complex protein 1, putative, expressed	AT5G40770.1	prohibitin 3
B.RT	Pavir.Aa01512.1.p|PACid:30252328	Pavir.Aa01512.1	4.515484	2.174880717	0.000275	30252328	Pavir.Aa01512.1	LOC_Os02g35940.1	gibberellin receptor GID1L2, putative, expressed	AT1G47480.1	alpha/beta-Hydrolases superfamily protein
B.RT	Pavir.Aa01553.1.p|PACid:30251686	Pavir.Aa01553.1	0.430535	-1.215799226	0.029767	30251686	Pavir.Aa01553.1	LOC_Os02g36710.1	SET, putative, expressed	AT1G18800.1	NAP1-related protein 2
B.RT	Pavir.Aa01645.1.p|PACid:30252357	Pavir.Aa01645.1	2.232854	1.158888836	0.007702	30252357	Pavir.Aa01645.1	LOC_Os02g35590.2	glutathione S-transferase, putative, expressed	AT2G02380.1	glutathione S-transferase (class zeta) 2
B.RT	Pavir.Aa01798.1.p|PACid:30252817	Pavir.Aa01798.1	3.006702	1.58818171	0.008664
B.RT	Pavir.Aa02058.1.p|PACid:30253206	Pavir.Aa02058.1	3.537638	1.82278631	0.000331	30253206	Pavir.Aa02058.1	LOC_Os03g14400.1	cytochrome P450, putative, expressed	AT2G45550.1	cytochrome P450, family 76, subfamily C, polypeptide 4
B.RT	Pavir.Aa02737.1.p|PACid:30249647	Pavir.Aa02737.1	4.857487	2.280210137	0.000771	30249647	Pavir.Aa02737.1	LOC_Os02g15250.1	late embryogenesis abundant domain-containing protein, putative, expressed	AT5G44310.2	Late embryogenesis abundant protein (LEA) family protein
B.RT	Pavir.Aa02791.1.p|PACid:30250198	Pavir.Aa02791.1	2.802349	1.486636637	0.011433	30250198	Pavir.Aa02791.1	LOC_Os02g14860.1	prefoldin subunit, putative, expressed	AT1G29990.1	prefoldin 6
B.RT	Pavir.Ab00731.1.p|PACid:30236320	Pavir.Ab00731.1	3.0943	1.629612978	0.026109	30236320	Pavir.Ab00731.1	LOC_Os02g10710.1	hsp20/alpha crystallin family protein, putative, expressed	AT1G52560.1	HSP20-like chaperones superfamily protein
B.RT	Pavir.Ab01333.3.p|PACid:30234571	Pavir.Ab01333.3	0.390542	-1.356449001	0.018214	30234571	Pavir.Ab01333.3	LOC_Os02g32814.1	heavy metal-associated domain containing protein, expressed	AT3G56240.1	copper chaperone
B.RT	Pavir.Ab01809.1.p|PACid:30232311	Pavir.Ab01809.1	4.564781	2.190545673	0.006366	30232311	Pavir.Ab01809.1	LOC_Os02g33070.1	expressed protein	AT5G04750.1	F1F0-ATPase inhibitor protein, putative
B.RT	Pavir.Ab02053.1.p|PACid:30235451	Pavir.Ab02053.1	3.33404	1.737271553	1.14e-05	30235451	Pavir.Ab02053.1	LOC_Os02g35940.1	gibberellin receptor GID1L2, putative, expressed	AT1G47480.1	alpha/beta-Hydrolases superfamily protein
B.RT	Pavir.Ab02274.1.p|PACid:30236541	Pavir.Ab02274.1	4.96473	2.31171527	0.002502	30236541	Pavir.Ab02274.1	LOC_Os02g39930.1	OsTIL-1 Temperature-induced lipocalin-1, expressed	AT5G58070.1	temperature-induced lipocalin
B.RT	Pavir.Ab02318.1.p|PACid:30235492	Pavir.Ab02318.1	4.773983	2.255193381	0.00856	30235492	Pavir.Ab02318.1	LOC_Os02g40500.1	OsGrx_C2.1 - glutaredoxin subgroup I, expressed	AT5G40370.1	Glutaredoxin family protein
B.RT	Pavir.Ab02893.1.p|PACid:30235608	Pavir.Ab02893.1	10.29451	3.363803836	0.014678
B.RT	Pavir.Ba00222.1.p|PACid:30290494	Pavir.Ba00222.1	4.412462	2.141583938	4.39e-05	30290494	Pavir.Ba00222.1	LOC_Os07g48160.1	alpha-galactosidase precursor, putative, expressed	AT3G56310.1	Melibiase family protein
B.RT	Pavir.Ba01215.1.p|PACid:30290531	Pavir.Ba01215.1	7.662647	2.937842796	0.002003	30290531	Pavir.Ba01215.1	LOC_Os09g36700.1	ribonuclease T2 family domain containing protein, expressed	AT1G14220.1	Ribonuclease T2 family protein
B.RT	Pavir.Ba01698.1.p|PACid:30291323	Pavir.Ba01698.1	0.420641	-1.249339508	0.010848	30291323	Pavir.Ba01698.1	LOC_Os09g31486.1	DnaK family protein, putative, expressed	AT5G09590.1	mitochondrial HSO70 2
B.RT	Pavir.Ba03245.1.p|PACid:30289089	Pavir.Ba03245.1	0.43056	-1.215714554	0.025292	30289089	Pavir.Ba03245.1	LOC_Os10g09620.1	OsWAK108 - OsWAK receptor-like protein kinase, expressed	AT1G21240.1	wall associated kinase 3
B.RT	Pavir.Ba03478.1.p|PACid:30291380	Pavir.Ba03478.1	2.666784	1.415101237	0.026339	30291380	Pavir.Ba03478.1	LOC_Os07g10500.1	cytochrome b-c1 complex subunit 7, putative, expressed	AT5G25450.1	Cytochrome bd ubiquinol oxidase, 14kDa subunit
B.RT	Pavir.Bb00105.1.p|PACid:30297002	Pavir.Bb00105.1	0.360465	-1.472069631	0.018465	30297002	Pavir.Bb00105.1	LOC_Os07g01410.1	peroxidase precursor, putative, expressed	AT3G01190.1	Peroxidase superfamily protein
B.RT	Pavir.Bb00159.1.p|PACid:30301712	Pavir.Bb00159.1	0.320453	-1.641814321	0.005591	30301712	Pavir.Bb00159.1	LOC_Os01g70525.1	tropinone reductase, putative, expressed	AT5G06060.1	NAD(P)-binding Rossmann-fold superfamily protein
B.RT	Pavir.Bb00247.1.p|PACid:30298381	Pavir.Bb00247.1	4.518638	2.175888117	0.000386	30298381	Pavir.Bb00247.1	LOC_Os07g04910.1	reticulon domain containing protein, putative, expressed	AT3G10260.3	Reticulon family protein
B.RT	Pavir.Bb00661.1.p|PACid:30300127	Pavir.Bb00661.1	3.027869	1.598302601	0.000437
B.RT	Pavir.Bb00689.1.p|PACid:30298226	Pavir.Bb00689.1	3.187969	1.672637631	0.008192	30298226	Pavir.Bb00689.1	LOC_Os04g51270.1	vacuolar ATPase G subunit, putative, expressed	AT3G01390.1	vacuolar membrane ATPase 10
B.RT	Pavir.Bb00696.1.p|PACid:30297757	Pavir.Bb00696.1	0.195067	-2.35795557	0.000274	30297757	Pavir.Bb00696.1	LOC_Os12g09700.1	Jacalin-like lectin domain containing protein, putative, expressed	AT1G19715.3	Mannose-binding lectin superfamily protein
B.RT	Pavir.Bb00799.1.p|PACid:30298345	Pavir.Bb00799.1	6.148824	2.620310461	0.027187	30298345	Pavir.Bb00799.1	LOC_Os12g43430.1	thaumatin, putative, expressed	AT4G11650.1	osmotin 34
B.RT	Pavir.Bb00974.1.p|PACid:30298341	Pavir.Bb00974.1	2.720335	1.443784114	0.001045	30298341	Pavir.Bb00974.1	LOC_Os09g30458.1	subtilisin-like protease, putative, expressed	AT1G20160.1	Subtilisin-like serine endopeptidase family protein
B.RT	Pavir.Bb01503.1.p|PACid:30300143	Pavir.Bb01503.1	3.164457	1.661958068	0.001759	30300143	Pavir.Bb01503.1	LOC_Os11g24374.1	OsSCP55 - Putative Serine Carboxypeptidase homologue, expressed	AT2G22980.1	serine carboxypeptidase-like 13
B.RT	Pavir.Bb01883.1.p|PACid:30296571	Pavir.Bb01883.1	2.70941	1.437978903	0.000159	30296571	Pavir.Bb01883.1	LOC_Os09g23370.1	proline-rich protein 6, putative, expressed	AT5G16940.1	carbon-sulfur lyases
B.RT	Pavir.Bb01893.1.p|PACid:30297522	Pavir.Bb01893.1	2.705541	1.435917178	0.000383	30297522	Pavir.Bb01893.1	LOC_Os09g23160.1	annexin, putative, expressed	AT1G68090.1	annexin 5
B.RT	Pavir.Bb02409.1.p|PACid:30298298	Pavir.Bb02409.1	3.951635	1.98244981	0.004678	30298298	Pavir.Bb02409.1	LOC_Os09g30438.2	expressed protein	AT2G33690.1	Late embryogenesis abundant protein, group 6
B.RT	Pavir.Bb02517.1.p|PACid:30300573	Pavir.Bb02517.1	0.432136	-1.210444183	0.003478	30300573	Pavir.Bb02517.1	LOC_Os09g29830.3	helix-loop-helix DNA-binding domain containing protein, expressed	AT1G68920.3	basic helix-loop-helix (bHLH) DNA-binding superfamily protein
B.RT	Pavir.Bb02686.1.p|PACid:30297191	Pavir.Bb02686.1	0.282867	-1.821804327	0.028927	30297191	Pavir.Bb02686.1	LOC_Os08g43580.1	acyl carrier protein, putative, expressed	AT1G54580.1	acyl carrier protein 2
B.RT	Pavir.Bb02933.1.p|PACid:30300552	Pavir.Bb02933.1	2.297351	1.199971381	0.002606	30300552	Pavir.Bb02933.1	LOC_Os07g35520.1	glucan endo-1,3-beta-glucosidase precursor, putative, expressed	AT5G55180.1	O-Glycosyl hydrolases family 17 protein
B.RT	Pavir.Bb03197.1.p|PACid:30299608	Pavir.Bb03197.1	7.834576	2.969855204	6.85e-05	30299608	Pavir.Bb03197.1	LOC_Os03g46070.1	thaumatin, putative, expressed	AT4G11650.1	osmotin 34
B.RT	Pavir.Bb03601.1.p|PACid:30301014	Pavir.Bb03601.1	2.298317	1.200577587	0.023046	30301014	Pavir.Bb03601.1	LOC_Os07g48040.1	peroxidase precursor, putative, expressed	AT5G05340.1	Peroxidase superfamily protein
B.RT	Pavir.Ca00243.1.p|PACid:30203089	Pavir.Ca00243.1	2.362289	1.240185218	0.002055	30203089	Pavir.Ca00243.1	LOC_Os12g07820.1	OsAPx6 - Stromal Ascorbate Peroxidase encoding gene 5,8, expressed	AT4G08390.1	stromal ascorbate peroxidase
B.RT	Pavir.Ca00347.1.p|PACid:30205712	Pavir.Ca00347.1	2.461026	1.299260025	0.013407	30205712	Pavir.Ca00347.1	LOC_Os12g15470.2	OsSCP65 - Putative Serine Carboxypeptidase homologue, expressed	AT4G12910.1	serine carboxypeptidase-like 20
B.RT	Pavir.Ca00608.1.p|PACid:30204384	Pavir.Ca00608.1	2.418752	1.274262617	0.020492	30204384	Pavir.Ca00608.1	LOC_Os12g36210.1	inhibitor I family protein, putative, expressed	AT2G38870.1	Serine protease inhibitor, potato inhibitor I-type family protein
B.RT	Pavir.Ca00609.1.p|PACid:30204579	Pavir.Ca00609.1	2.759778	1.46455218	0.001024	30204579	Pavir.Ca00609.1	LOC_Os12g25090.2	expressed protein	AT2G38870.1	Serine protease inhibitor, potato inhibitor I-type family protein
B.RT	Pavir.Ca00875.1.p|PACid:30206961	Pavir.Ca00875.1	0.443258	-1.173782613	0.047912	30206961	Pavir.Ca00875.1	LOC_Os05g48030.1	anti-silencing protein, ASF1-like domain containing protein, expressed	AT5G38110.1	anti- silencing function 1b
B.RT	Pavir.Ca01448.1.p|PACid:30204925	Pavir.Ca01448.1	2.500038	1.321950107	0.003602	30204925	Pavir.Ca01448.1	LOC_Os05g28210.1	small hydrophilic plant seed protein, putative, expressed	AT3G51810.1	Stress induced protein
B.RT	Pavir.Ca01780.1.p|PACid:30206225	Pavir.Ca01780.1	5.357559	2.421575931	0.015912	30206225	Pavir.Ca01780.1	LOC_Os05g46480.1	late embryogenesis abundant protein, group 3, putative, expressed	AT3G15670.1	Late embryogenesis abundant protein (LEA) family protein
B.RT	Pavir.Ca01801.1.p|PACid:30205996	Pavir.Ca01801.1	2.356576	1.236692032	0.006588	30205996	Pavir.Ca01801.1	LOC_Os05g47446.1	expressed protein	AT1G29850.1	double-stranded DNA-binding family protein
B.RT	Pavir.Ca02189.1.p|PACid:30206971	Pavir.Ca02189.1	4.520387	2.176446145	0.01538	30206971	Pavir.Ca02189.1	LOC_Os12g29400.1	GRAM domain containing protein, expressed	AT5G13200.1	GRAM domain family protein
B.RT	Pavir.Ca02289.1.p|PACid:30205882	Pavir.Ca02289.1	2.255154	1.173226177	0.002455	30205882	Pavir.Ca02289.1	LOC_Os06g02780.1	aspartic protease, putative, expressed	AT5G10770.1	Eukaryotic aspartyl protease family protein
B.RT	Pavir.Ca02660.1.p|PACid:30206509	Pavir.Ca02660.1	2.947185	1.559337787	0.000973	30206509	Pavir.Ca02660.1	LOC_Os12g36640.2	universal stress protein domain containing protein, putative, expressed	AT2G47710.1	Adenine nucleotide alpha hydrolases-like superfamily protein
B.RT	Pavir.Cb00512.1.p|PACid:30268195	Pavir.Cb00512.1	2.436744	1.284954671	0.000104	30268195	Pavir.Cb00512.1	LOC_Os12g38150.1	osmotin, putative, expressed	AT2G28790.1	Pathogenesis-related thaumatin superfamily protein
B.RT	Pavir.Cb00662.1.p|PACid:30269981	Pavir.Cb00662.1	4.818117	2.268469485	0.005112	30269981	Pavir.Cb00662.1	LOC_Os11g26790.1	dehydrin, putative, expressed	AT5G66400.1	Dehydrin family protein
B.RT	Pavir.Cb00701.1.p|PACid:30268632	Pavir.Cb00701.1	0.375223	-1.414180735	0.000129	30268632	Pavir.Cb00701.1	LOC_Os12g25630.1	sulfite oxidase, putative, expressed	AT3G01910.1	sulfite oxidase
B.RT	Pavir.Cb00761.1.p|PACid:30268661	Pavir.Cb00761.1	3.243522	1.697561416	0.014984	30268661	Pavir.Cb00761.1	LOC_Os12g29400.1	GRAM domain containing protein, expressed	AT5G13200.1	GRAM domain family protein
B.RT	Pavir.Cb00876.1.p|PACid:30269914	Pavir.Cb00876.1	3.572015	1.836738201	0.000448	30269914	Pavir.Cb00876.1	LOC_Os12g35670.1	RALFL4 - Rapid ALkalinization Factor RALF family protein precursor, expressed	AT3G05490.1	ralf-like 22
B.RT	Pavir.Cb01805.1.p|PACid:30268747	Pavir.Cb01805.1	2.269551	1.182406696	0.018772	30268747	Pavir.Cb01805.1	LOC_Os11g20790.1	adenylate kinase, putative, expressed	AT5G63400.1	adenylate kinase 1
B.RT	Pavir.Cb02121.1.p|PACid:30267871	Pavir.Cb02121.1	2.696919	1.431312253	0.002556	30267871	Pavir.Cb02121.1	LOC_Os11g03730.1	alpha-N-arabinofuranosidase A, putative, expressed	AT3G10740.1	alpha-L-arabinofuranosidase 1
B.RT	Pavir.Da00087.1.p|PACid:30194507	Pavir.Da00087.1	3.95244	1.982743468	0.001662	30194507	Pavir.Da00087.1	LOC_Os06g46740.1	early nodulin 20 precursor, putative, expressed	AT3G20570.1	early nodulin-like protein 9
B.RT	Pavir.Da00146.1.p|PACid:30192844	Pavir.Da00146.1	5.5089	2.461764167	0.013412	30192844	Pavir.Da00146.1	LOC_Os06g48020.1	peroxidase precursor, putative, expressed	AT4G30170.1	Peroxidase family protein
B.RT	Pavir.Da00449.1.p|PACid:30194478	Pavir.Da00449.1	3.01073	1.590113225	0.016142	30194478	Pavir.Da00449.1	LOC_Os02g09150.1	inorganic H+ pyrophosphatase, putative, expressed	AT1G15690.1	Inorganic H pyrophosphatase family protein
B.RT	Pavir.Da00795.1.p|PACid:30194578	Pavir.Da00795.1	2.486424	1.314072075	0.005527	30194578	Pavir.Da00795.1	LOC_Os01g71080.1	xylanase inhibitor, putative, expressed	AT1G03230.1	Eukaryotic aspartyl protease family protein
B.RT	Pavir.Da00810.1.p|PACid:30192346	Pavir.Da00810.1	2.905442	1.538757844	0.002343	30192346	Pavir.Da00810.1	LOC_Os06g35700.1	reticuline oxidase-like protein precursor, putative, expressed	AT4G20860.1	FAD-binding Berberine family protein
B.RT	Pavir.Da01632.1.p|PACid:30191845	Pavir.Da01632.1	3.619732	1.855882906	0.001957	30191845	Pavir.Da01632.1	LOC_Os06g23350.1	late embryogenesis abundant protein D-34, putative, expressed	AT3G22490.1	Seed maturation protein
B.RT	Pavir.Da02337.1.p|PACid:30193209	Pavir.Da02337.1	3.654131	1.869528471	0.012848	30193209	Pavir.Da02337.1	LOC_Os06g04460.1	hypersensitive-induced response protein, putative, expressed	AT5G51570.1	SPFH/Band 7/PHB domain-containing membrane-associated protein family
B.RT	Pavir.Da02439.1.p|PACid:30193736	Pavir.Da02439.1	2.845205	1.508532448	0.003567	30193736	Pavir.Da02439.1	LOC_Os06g01360.1	homogentisate 1,2-dioxygenase, putative, expressed	AT5G54080.1	homogentisate 1,2-dioxygenase
B.RT	Pavir.Db00351.1.p|PACid:30262264	Pavir.Db00351.1	2.234231	1.159778574	0.020723	30262264	Pavir.Db00351.1	LOC_Os06g46900.1	phosphosulfolactate synthase-related protein, putative, expressed	AT4G21320.1	Aldolase-type TIM barrel family protein
B.RT	Pavir.Db00371.1.p|PACid:30262621	Pavir.Db00371.1	3.077263	1.621647642	0.000148	30262621	Pavir.Db00371.1	LOC_Os06g46372.1	dehydrogenase, putative, expressed	AT4G20930.1	6-phosphogluconate dehydrogenase family protein
B.RT	Pavir.Db01426.1.p|PACid:30261195	Pavir.Db01426.1	2.8841	1.528121325	0.000478	30261195	Pavir.Db01426.1	LOC_Os06g16000.1	UDP-glucoronosyl and UDP-glucosyl transferase, putative, expressed	AT2G16890.2	UDP-Glycosyltransferase superfamily protein
B.RT	Pavir.Db01446.1.p|PACid:30262333	Pavir.Db01446.1	2.55628	1.35404559	0.016912	30262333	Pavir.Db01446.1	LOC_Os06g34040.1	DJ-1 family protein, putative, expressed	AT1G53280.1	Class I glutamine amidotransferase-like superfamily protein
B.RT	Pavir.Db01460.1.p|PACid:30261745	Pavir.Db01460.1	2.410852	1.269543133	0.001891	30261745	Pavir.Db01460.1	LOC_Os01g71080.1	xylanase inhibitor, putative, expressed	AT1G03230.1	Eukaryotic aspartyl protease family protein
B.RT	Pavir.Db01776.1.p|PACid:30261030	Pavir.Db01776.1	3.294375	1.720004729	0.00011	30261030	Pavir.Db01776.1	LOC_Os06g13720.1	dehydrogenase E1 component domain containing protein, expressed	AT1G24180.1	Thiamin diphosphate-binding fold (THDP-binding) superfamily protein
B.RT	Pavir.Db02130.1.p|PACid:30260942	Pavir.Db02130.1	2.236997	1.161563154	0.000488	30260942	Pavir.Db02130.1	LOC_Os06g06550.1	plant protein of unknown function domain containing protein, expressed	AT3G02645.1	Plant protein of unknown function (DUF247)
B.RT	Pavir.Ea00048.1.p|PACid:30230356	Pavir.Ea00048.1	11.05977	3.467249273	7.15e-05	30230356	Pavir.Ea00048.1	LOC_Os01g13210.1	salt stress root protein RS1, putative, expressed	AT4G20260.5	plasma-membrane associated cation-binding protein 1
B.RT	Pavir.Ea00101.1.p|PACid:30231090	Pavir.Ea00101.1	3.541628	1.824412667	0.009023	30231090	Pavir.Ea00101.1	LOC_Os01g12660.1	AAA-type ATPase family protein, putative, expressed	AT1G64110.3	P-loop containing nucleoside triphosphate hydrolases superfamily protein
B.RT	Pavir.Ea00295.1.p|PACid:30226575	Pavir.Ea00295.1	3.989345	1.996151799	0.000713	30226575	Pavir.Ea00295.1	LOC_Os06g14400.1	1-aminocyclopropane-1-carboxylate oxidase homolog 4, putative, expressed	AT1G03400.1	2-oxoglutarate (2OG) and Fe(II)-dependent oxygenase superfamily protein
B.RT	Pavir.Ea00389.1.p|PACid:30228609	Pavir.Ea00389.1	2.33538	1.223657558	0.000787	30228609	Pavir.Ea00389.1	LOC_Os01g07780.1	embryo-specific 3, putative, expressed	AT5G62200.1	Embryo-specific protein 3, (ATS3)
B.RT	Pavir.Ea00606.1.p|PACid:30226304	Pavir.Ea00606.1	6.527769	2.70659008	0.019831	30226304	Pavir.Ea00606.1	LOC_Os01g04370.1	hsp20/alpha crystallin family protein, putative, expressed	AT5G59720.1	heat shock protein 18.2
B.RT	Pavir.Ea01029.1.p|PACid:30228283	Pavir.Ea01029.1	3.70054	1.887735846	0.000615
B.RT	Pavir.Ea01261.1.p|PACid:30231507	Pavir.Ea01261.1	3.202173	1.679051453	0.000924	30231507	Pavir.Ea01261.1	LOC_Os04g59260.1	peroxidase precursor, putative, expressed	AT1G71695.1	Peroxidase superfamily protein
B.RT	Pavir.Ea01477.1.p|PACid:30231124	Pavir.Ea01477.1	2.293304	1.197427857	0.001039	30231124	Pavir.Ea01477.1	LOC_Os01g22336.1	peroxidase precursor, putative, expressed	AT3G21770.1	Peroxidase superfamily protein
B.RT	Pavir.Ea01477.2.p|PACid:30231125	Pavir.Ea01477.2	3.315026	1.729020359	0.002498	30231125	Pavir.Ea01477.2	LOC_Os01g22352.1	peroxidase precursor, putative, expressed	AT1G44970.1	Peroxidase superfamily protein
B.RT	Pavir.Ea01561.1.p|PACid:30227923	Pavir.Ea01561.1	2.822925	1.497191039	3.58e-05	30227923	Pavir.Ea01561.1	LOC_Os07g35680.1	TKL_IRAK_DUF26-lc22 - DUF26 kinases have homology to DUF26 containing loci, expressed	AT4G23180.1	cysteine-rich RLK (RECEPTOR-like protein kinase) 10
B.RT	Pavir.Ea01573.1.p|PACid:30227608	Pavir.Ea01573.1	0.391598	-1.352555081	0.001879	30227608	Pavir.Ea01573.1	LOC_Os01g39860.1	1-aminocyclopropane-1-carboxylate oxidase protein, putative, expressed	AT2G19590.1	ACC oxidase 1
B.RT	Pavir.Ea02163.1.p|PACid:30231351	Pavir.Ea02163.1	0.352649	-1.503693257	0.019136	30231351	Pavir.Ea02163.1	LOC_Os01g42650.1	cytochrome c oxidase subunit 5B, mitochondrial precursor, putative, expressed	AT3G15640.1	Rubredoxin-like superfamily protein
B.RT	Pavir.Ea02270.1.p|PACid:30227344	Pavir.Ea02270.1	9.355787	3.225859067	0.008613
B.RT	Pavir.Ea02477.1.p|PACid:30226286	Pavir.Ea02477.1	2.957453	1.564355409	0.001301	30226286	Pavir.Ea02477.1	LOC_Os01g49320.1	glycosyl hydrolase, putative, expressed	AT5G24090.1	chitinase A
B.RT	Pavir.Ea02497.1.p|PACid:30228113	Pavir.Ea02497.1	4.909066	2.295448559	0.00215	30228113	Pavir.Ea02497.1	LOC_Os01g49710.1	glutathione S-transferase, putative, expressed	AT1G10360.1	glutathione S-transferase TAU 18
B.RT	Pavir.Ea02555.1.p|PACid:30227938	Pavir.Ea02555.1	5.104108	2.35165881	0.007524
B.RT	Pavir.Ea02930.1.p|PACid:30228432	Pavir.Ea02930.1	0.444739	-1.168968954	0.005661	30228432	Pavir.Ea02930.1	LOC_Os10g17660.1	profilin domain containing protein, expressed	AT2G19770.1	profilin 5
B.RT	Pavir.Ea02983.1.p|PACid:30228167	Pavir.Ea02983.1	4.567403	2.19137406	0.011064	30228167	Pavir.Ea02983.1	LOC_Os01g54030.1	NADP-dependent malic enzyme, putative, expressed	AT1G79750.1	NADP-malic enzyme 4
B.RT	Pavir.Ea03286.1.p|PACid:30226410	Pavir.Ea03286.1	3.701417	1.888077556	0.004319	30226410	Pavir.Ea03286.1	LOC_Os01g61230.1	dihydroflavonol-4-reductase, putative, expressed	AT5G58490.1	NAD(P)-binding Rossmann-fold superfamily protein
B.RT	Pavir.Ea03384.1.p|PACid:30226667	Pavir.Ea03384.1	4.459598	2.156913663	0.005651
B.RT	Pavir.Ea03391.1.p|PACid:30231527	Pavir.Ea03391.1	2.657344	1.409984899	0.000105	30231527	Pavir.Ea03391.1	LOC_Os01g62980.1	LTPL101 - Protease inhibitor/seed storage/LTP family protein precursor, expressed	AT5G05960.1	Bifunctional inhibitor/lipid-transfer protein/seed storage 2S albumin superfamily protein
B.RT	Pavir.Eb00019.1.p|PACid:30314169	Pavir.Eb00019.1	11.776	3.55777762	5.13e-05	30314169	Pavir.Eb00019.1	LOC_Os01g13210.1	salt stress root protein RS1, putative, expressed	AT4G20260.5	plasma-membrane associated cation-binding protein 1
B.RT	Pavir.Eb00652.1.p|PACid:30309445	Pavir.Eb00652.1	2.673775	1.418877855	0.00479
B.RT	Pavir.Eb00769.1.p|PACid:30314162	Pavir.Eb00769.1	3.206955	1.681204105	0.043583	30314162	Pavir.Eb00769.1	LOC_Os01g04370.1	hsp20/alpha crystallin family protein, putative, expressed	AT5G59720.1	heat shock protein 18.2
B.RT	Pavir.Eb00944.1.p|PACid:30309163	Pavir.Eb00944.1	2.878279	1.525206253	0.004714	30309163	Pavir.Eb00944.1	LOC_Os01g15320.1	RALFL9 - Rapid ALkalinization Factor RALF family protein precursor, expressed	AT4G15800.1	ralf-like 33
B.RT	Pavir.Eb01124.1.p|PACid:30311582	Pavir.Eb01124.1	2.302546	1.203229798	0.005534	30311582	Pavir.Eb01124.1	LOC_Os01g16430.1	cysteine proteinase inhibitor precursor protein, putative, expressed	AT3G12490.2	cystatin B
B.RT	Pavir.Eb02512.1.p|PACid:30308767	Pavir.Eb02512.1	3.016337	1.592797555	0.01506	30308767	Pavir.Eb02512.1	LOC_Os01g12580.1	late embryogenesis abundant protein, putative, expressed	AT1G01470.1	Late embryogenesis abundant protein
B.RT	Pavir.Eb02854.1.p|PACid:30311461	Pavir.Eb02854.1	2.479151	1.309846357	0.00615	30311461	Pavir.Eb02854.1	LOC_Os01g49720.1	glutathione S-transferase, putative, expressed	AT1G10360.1	glutathione S-transferase TAU 18
B.RT	Pavir.Eb03276.1.p|PACid:30312971	Pavir.Eb03276.1	2.93781	1.554741311	0.000233	30312971	Pavir.Eb03276.1	LOC_Os01g56150.1	OsProCP1 - Putative Lysosomal Pro-x Carboxypeptidase homologue, expressed	AT5G65760.1	Serine carboxypeptidase S28 family protein
B.RT	Pavir.Eb03528.1.p|PACid:30313714	Pavir.Eb03528.1	2.641562	1.401391436	0.000644	30313714	Pavir.Eb03528.1	LOC_Os01g70520.1	Os1bglu5 - beta-glucosidase homologue, similar to G. max isohydroxyurate hydrolase, expressed	AT1G02850.2	beta glucosidase 11
B.RT	Pavir.Eb03806.1.p|PACid:30312699	Pavir.Eb03806.1	6.430518	2.684934939	0.003648	30312699	Pavir.Eb03806.1	LOC_Os12g43490.1	thaumatin, putative, expressed	AT4G11650.1	osmotin 34
B.RT	Pavir.Eb03999.1.p|PACid:30313144	Pavir.Eb03999.1	2.289923	1.195298979	0.000309	30313144	Pavir.Eb03999.1	LOC_Os01g73170.1	peroxidase precursor, putative, expressed	AT1G71695.1	Peroxidase superfamily protein
B.RT	Pavir.Fa00172.1.p|PACid:30188767	Pavir.Fa00172.1	3.135363	1.648632667	0.000569	30188767	Pavir.Fa00172.1	LOC_Os08g44460.3	expressed protein	AT5G04750.1	F1F0-ATPase inhibitor protein, putative
B.RT	Pavir.Fa00915.1.p|PACid:30186533	Pavir.Fa00915.1	3.689039	1.883244852	0.003559	30186533	Pavir.Fa00915.1	LOC_Os08g36320.3	decarboxylase, putative, expressed	AT5G17330.1	glutamate decarboxylase
B.RT	Pavir.Fa01008.1.p|PACid:30186143	Pavir.Fa01008.1	2.439141	1.286373333	0.002446	30186143	Pavir.Fa01008.1	LOC_Os08g02230.1	FAD-binding and arabino-lactone oxidase domains containing protein, putative, expressed	AT2G46750.1	D-arabinono-1,4-lactone oxidase family protein
B.RT	Pavir.Fa01429.1.p|PACid:30188288	Pavir.Fa01429.1	3.324209	1.733010946	0.001315	30188288	Pavir.Fa01429.1	LOC_Os03g12230.1	caleosin related protein, putative, expressed	AT2G33380.1	Caleosin-related family protein
B.RT	Pavir.Fa01472.1.p|PACid:30186898	Pavir.Fa01472.1	3.540002	1.823750257	0.001345	30186898	Pavir.Fa01472.1	LOC_Os08g27850.1	endothelial differentiation-related factor 1, putative, expressed	AT2G42680.1	multiprotein bridging factor 1A
B.RT	Pavir.Fa01556.1.p|PACid:30187567	Pavir.Fa01556.1	6.629384	2.728874736	0.00025	30187567	Pavir.Fa01556.1	LOC_Os08g02230.1	FAD-binding and arabino-lactone oxidase domains containing protein, putative, expressed	AT1G32300.1	D-arabinono-1,4-lactone oxidase family protein
B.RT	Pavir.Fa01601.1.p|PACid:30186390	Pavir.Fa01601.1	4.334116	2.115737744	0.000236	30186390	Pavir.Fa01601.1	LOC_Os08g02230.1	FAD-binding and arabino-lactone oxidase domains containing protein, putative, expressed	AT2G46760.1	D-arabinono-1,4-lactone oxidase family protein
B.RT	Pavir.Fa01764.1.p|PACid:30187362	Pavir.Fa01764.1	2.507454	1.326223079	0.001103	30187362	Pavir.Fa01764.1	LOC_Os08g12800.1	glucan endo-1,3-beta-glucosidase precursor, putative, expressed	AT5G58090.1	O-Glycosyl hydrolases family 17 protein
B.RT	Pavir.Fa02123.1.p|PACid:30186363	Pavir.Fa02123.1	2.951855	1.56162171	4.18e-05	30186363	Pavir.Fa02123.1	LOC_Os08g09250.2	glyoxalase family protein, putative, expressed	AT1G11840.6	glyoxalase I homolog
B.RT	Pavir.Fa02186.1.p|PACid:30187239	Pavir.Fa02186.1	3.063839	1.615340378	0.000246	30187239	Pavir.Fa02186.1	LOC_Os08g01950.1	transferase family protein, putative, expressed	AT5G67150.1	HXXXD-type acyl-transferase family protein
B.RT	Pavir.Fa02193.1.p|PACid:30185674	Pavir.Fa02193.1	2.431685	1.281956639	0.000944	30185674	Pavir.Fa02193.1	LOC_Os07g38300.1	ribosome recycling factor, putative, expressed	AT3G63190.1	ribosome recycling factor, chloroplast precursor
B.RT	Pavir.Fb00477.1.p|PACid:30279639	Pavir.Fb00477.1	2.361626	1.239780723	0.001472
B.RT	Pavir.Fb00620.1.p|PACid:30278273	Pavir.Fb00620.1	3.406171	1.768150877	0.00023	30278273	Pavir.Fb00620.1	LOC_Os08g09250.2	glyoxalase family protein, putative, expressed	AT1G11840.6	glyoxalase I homolog
B.RT	Pavir.Fb00948.1.p|PACid:30279736	Pavir.Fb00948.1	8.380485	3.067033678	0.003989	30279736	Pavir.Fb00948.1	LOC_Os06g23350.1	late embryogenesis abundant protein D-34, putative, expressed	AT3G22490.1	Seed maturation protein
B.RT	Pavir.Fb01262.1.p|PACid:30280025	Pavir.Fb01262.1	2.368271	1.243834045	0.001388	30280025	Pavir.Fb01262.1	LOC_Os01g32780.1	universal stress protein domain containing protein, putative, expressed	AT1G68300.1	Adenine nucleotide alpha hydrolases-like superfamily protein
B.RT	Pavir.Fb01387.1.p|PACid:30279215	Pavir.Fb01387.1	2.829219	1.500403655	0.023852	30279215	Pavir.Fb01387.1	LOC_Os08g27850.1	endothelial differentiation-related factor 1, putative, expressed	AT2G42680.1	multiprotein bridging factor 1A
B.RT	Pavir.Fb01711.1.p|PACid:30278677	Pavir.Fb01711.1	3.815274	1.931786771	0.00053	30278677	Pavir.Fb01711.1	LOC_Os08g36320.3	decarboxylase, putative, expressed	AT5G17330.1	glutamate decarboxylase
B.RT	Pavir.Fb02055.1.p|PACid:30278309	Pavir.Fb02055.1	4.044431	2.015936626	3.18e-05	30278309	Pavir.Fb02055.1	LOC_Os01g05610.1	Core histone H2A/H2B/H3/H4 domain containing protein, putative, expressed	AT5G59910.1	Histone superfamily protein
B.RT	Pavir.Fb02222.1.p|PACid:30279249	Pavir.Fb02222.1	2.393501	1.259122608	0.000779	30279249	Pavir.Fb02222.1	LOC_Os08g44770.1	copper/zinc superoxide dismutase, putative, expressed	AT2G28190.1	copper/zinc superoxide dismutase 2
B.RT	Pavir.Fb02310.1.p|PACid:30278297	Pavir.Fb02310.1	0.256545	-1.962713826	0.027159	30278297	Pavir.Fb02310.1	LOC_Os08g43580.1	acyl carrier protein, putative, expressed	AT1G54580.1	acyl carrier protein 2
B.RT	Pavir.Ga00514.2.p|PACid:30305072	Pavir.Ga00514.2	0.432219	-1.210165641	0.00939	30305072	Pavir.Ga00514.2	LOC_Os04g58570.1	C2 domain containing protein, putative, expressed	AT1G63220.1	Calcium-dependent lipid-binding (CaLB domain) family protein
B.RT	Pavir.Ga00596.1.p|PACid:30302580	Pavir.Ga00596.1	5.85235	2.549016132	0.01181	30302580	Pavir.Ga00596.1	LOC_Os04g52110.1	late embryogenesis abundant protein, group 3, putative, expressed	AT5G44310.2	Late embryogenesis abundant protein (LEA) family protein
B.RT	Pavir.Ga00880.1.p|PACid:30306064	Pavir.Ga00880.1	3.177481	1.667883616	0.000148	30306064	Pavir.Ga00880.1	LOC_Os04g45070.1	remorin, putative, expressed	AT3G61260.1	Remorin family protein
B.RT	Pavir.Ga01295.1.p|PACid:30303990	Pavir.Ga01295.1	14.74342	3.881999705	0.012995	30303990	Pavir.Ga01295.1	LOC_Os04g43170.1	caleosin related protein, putative, expressed	AT4G26740.1	seed gene 1
B.RT	Pavir.Ga01599.1.p|PACid:30305090	Pavir.Ga01599.1	12.3156	3.622415096	0.002787
B.RT	Pavir.Ga01678.1.p|PACid:30303654	Pavir.Ga01678.1	4.058748	2.021034884	6.98e-05	30303654	Pavir.Ga01678.1	LOC_Os04g37490.1	oxidoreductase, aldo/keto reductase family protein, putative, expressed	AT1G59960.1	NAD(P)-linked oxidoreductase superfamily protein
B.RT	Pavir.Ga02610.1.p|PACid:30303668	Pavir.Ga02610.1	2.290162	1.195449931	0.002403	30303668	Pavir.Ga02610.1	LOC_Os04g25560.1	OsSCP23 - Putative Serine Carboxypeptidase homologue, expressed	AT4G12910.1	serine carboxypeptidase-like 20
B.RT	Pavir.Ga02727.1.p|PACid:30302629	Pavir.Ga02727.1	2.631514	1.395893102	0.000322	30302629	Pavir.Ga02727.1	LOC_Os04g15690.1	DSBA-like thioredoxin domain containing protein, expressed	AT1G20225.1	Thioredoxin superfamily protein
B.RT	Pavir.Gb00413.1.p|PACid:30223284	Pavir.Gb00413.1	2.596625	1.376637918	0.000475	30223284	Pavir.Gb00413.1	LOC_Os04g53850.1	leucoanthocyanidin reductase, putative, expressed	AT1G61720.1	NAD(P)-binding Rossmann-fold superfamily protein
B.RT	Pavir.Gb00543.1.p|PACid:30223554	Pavir.Gb00543.1	7.060823	2.819836433	0.012797	30223554	Pavir.Gb00543.1	LOC_Os04g52110.1	late embryogenesis abundant protein, group 3, putative, expressed	AT5G44310.2	Late embryogenesis abundant protein (LEA) family protein
B.RT	Pavir.Gb00667.1.p|PACid:30221854	Pavir.Gb00667.1	3.433134	1.779526086	9.66e-05
B.RT	Pavir.Gb00728.1.p|PACid:30224773	Pavir.Gb00728.1	0.305955	-1.708606355	0.003177	30224773	Pavir.Gb00728.1	LOC_Os04g44870.1	C2 domain containing protein, putative, expressed	AT1G63220.1	Calcium-dependent lipid-binding (CaLB domain) family protein
B.RT	Pavir.Gb00738.1.p|PACid:30224391	Pavir.Gb00738.1	3.031489	1.600026734	0.000259	30224391	Pavir.Gb00738.1	LOC_Os04g45070.1	remorin, putative, expressed	AT3G61260.1	Remorin family protein
B.RT	Pavir.Gb01434.1.p|PACid:30221789	Pavir.Gb01434.1	4.647665	2.216506142	0.008486	30221789	Pavir.Gb01434.1	LOC_Os04g41620.1	CHIT2 - Chitinase family protein precursor, expressed	AT3G54420.1	homolog of carrot EP3-3 chitinase
B.RT	Pavir.Gb01438.1.p|PACid:30222902	Pavir.Gb01438.1	3.073749	1.619999558	0.000408	30222902	Pavir.Gb01438.1	LOC_Os04g41580.1	glycine-rich protein, putative, expressed	AT3G59640.1	glycine-rich protein
B.RT	Pavir.Gb01551.1.p|PACid:30224863	Pavir.Gb01551.1	4.904403	2.294077533	0.000849	30224863	Pavir.Gb01551.1	LOC_Os04g38390.1	wound/stress protein, putative, expressed	AT4G39730.1	Lipase/lipooxygenase, PLAT/LH2 family protein
B.RT	Pavir.Gb01843.1.p|PACid:30224099	Pavir.Gb01843.1	2.793888	1.482273935	0.000728	30224099	Pavir.Gb01843.1	LOC_Os04g35090.1	40S ribosomal protein S10, putative, expressed	AT5G52650.1	RNA binding Plectin/S10 domain-containing protein
B.RT	Pavir.Gb01868.1.p|PACid:30222408	Pavir.Gb01868.1	10.1045	3.336926025	3.31e-06	30222408	Pavir.Gb01868.1	LOC_Os04g33920.1	LTPL102 - Protease inhibitor/seed storage/LTP family protein precursor, expressed	AT5G05960.1	Bifunctional inhibitor/lipid-transfer protein/seed storage 2S albumin superfamily protein
B.RT	Pavir.Gb01988.1.p|PACid:30223710	Pavir.Gb01988.1	0.432386	-1.209609332	0.016744	30223710	Pavir.Gb01988.1	LOC_Os04g31700.1	methylisocitrate lyase 2, putative, expressed	AT2G43180.4	Phosphoenolpyruvate carboxylase family protein
B.RT	Pavir.Gb02161.1.p|PACid:30221760	Pavir.Gb02161.1	5.832196	2.544039297	0.002931	30221760	Pavir.Gb02161.1	LOC_Os01g71080.1	xylanase inhibitor, putative, expressed	AT1G03230.1	Eukaryotic aspartyl protease family protein
B.RT	Pavir.Ha01276.1.p|PACid:30316445	Pavir.Ha01276.1	2.287927	1.194041281	0.000344	30316445	Pavir.Ha01276.1	LOC_Os11g20090.1	O-methyltransferase, putative, expressed	AT4G35150.1	O-methyltransferase family protein
B.RT	Pavir.Ha01832.1.p|PACid:30318014	Pavir.Ha01832.1	3.490071	1.803256586	0.001422	30318014	Pavir.Ha01832.1	LOC_Os11g06340.1	ubiquinol-cytochrome C reductase hinge protein, putative, expressed	AT1G15120.1	Ubiquinol-cytochrome C reductase hinge protein
B.RT	Pavir.Hb00971.1.p|PACid:30264344	Pavir.Hb00971.1	5.503061	2.460234372	0.004147
B.RT	Pavir.Hb01571.1.p|PACid:30264315	Pavir.Hb01571.1	3.763357	1.912020183	0.012635	30264315	Pavir.Hb01571.1	LOC_Os06g32550.1	THION14 - Plant thionin family protein precursor, putative, expressed	AT1G66100.1	Plant thionin
B.RT	Pavir.Hb01608.1.p|PACid:30265005	Pavir.Hb01608.1	2.934474	1.553102132	0.001024	30265005	Pavir.Hb01608.1	LOC_Os11g14990.1	expressed protein	AT2G31725.1	Eukaryotic protein of unknown function (DUF842)
B.RT	Pavir.Ia00088.1.p|PACid:30209179	Pavir.Ia00088.1	2.397816	1.261721188	0.000859	30209179	Pavir.Ia00088.1	LOC_Os03g63740.1	NFD2, putative, expressed	AT1G24450.1	Ribonuclease III family protein
B.RT	Pavir.Ia00797.1.p|PACid:30210919	Pavir.Ia00797.1	4.037558	2.013483017	0.000166	30210919	Pavir.Ia00797.1	LOC_Os03g50160.1	plastocyanin-like domain containing protein, putative, expressed	AT2G02850.1	plantacyanin
B.RT	Pavir.Ia00863.1.p|PACid:30209658	Pavir.Ia00863.1	2.734078	1.451054523	0.001083	30209658	Pavir.Ia00863.1	LOC_Os03g50490.1	glutamine synthetase, catalytic domain containing protein, expressed	AT1G66200.1	glutamine synthase clone F11
B.RT	Pavir.Ia00911.1.p|PACid:30215736	Pavir.Ia00911.1	2.921058	1.546490913	0.024418
B.RT	Pavir.Ia01105.1.p|PACid:30210515	Pavir.Ia01105.1	3.365131	1.750662579	0.000694	30210515	Pavir.Ia01105.1	LOC_Os03g45390.1	glucan endo-1,3-beta-glucosidase precursor, putative, expressed	AT2G19440.1	O-Glycosyl hydrolases family 17 protein
B.RT	Pavir.Ia01656.1.p|PACid:30212157	Pavir.Ia01656.1	2.345738	1.230041899	7.71e-05	30212157	Pavir.Ia01656.1	LOC_Os10g33270.1	cyanate hydratase, putative, expressed	AT3G23490.1	cyanase
B.RT	Pavir.Ia01975.1.p|PACid:30210367	Pavir.Ia01975.1	2.264115	1.178947537	3.97e-05	30210367	Pavir.Ia01975.1	LOC_Os10g27280.1	thaumatin, putative, expressed	AT5G40020.1	Pathogenesis-related thaumatin superfamily protein
B.RT	Pavir.Ia02294.1.p|PACid:30209464	Pavir.Ia02294.1	0.397765	-1.330012839	0.031533	30209464	Pavir.Ia02294.1	LOC_Os06g23440.1	eukaryotic translation initiation factor 1A, putative, expressed	AT2G04520.1	Nucleic acid-binding, OB-fold-like protein
B.RT	Pavir.Ia02658.1.p|PACid:30211741	Pavir.Ia02658.1	4.625447	2.209592927	0.003678
B.RT	Pavir.Ia02723.1.p|PACid:30214198	Pavir.Ia02723.1	3.14001	1.650769017	0.000116	30214198	Pavir.Ia02723.1	LOC_Os10g18340.1	expressed protein	AT2G03440.1	nodulin-related protein 1
B.RT	Pavir.Ia02811.1.p|PACid:30212405	Pavir.Ia02811.1	2.97418	1.572492096	0.000972	30212405	Pavir.Ia02811.1	LOC_Os10g02040.1	peroxidase precursor, putative, expressed	AT5G06720.1	peroxidase 2
B.RT	Pavir.Ia03296.1.p|PACid:30210796	Pavir.Ia03296.1	0.331447	-1.593149479	0.044355	30210796	Pavir.Ia03296.1	LOC_Os03g25360.1	peroxidase precursor, putative, expressed	AT5G42180.1	Peroxidase superfamily protein
B.RT	Pavir.Ia03338.1.p|PACid:30213628	Pavir.Ia03338.1	3.168652	1.66386901	0.036133
B.RT	Pavir.Ia03415.1.p|PACid:30214719	Pavir.Ia03415.1	3.661201	1.872317042	0.006536	30214719	Pavir.Ia03415.1	LOC_Os03g22120.1	sucrose synthase, putative, expressed	AT4G02280.1	sucrose synthase 3
B.RT	Pavir.Ia03444.1.p|PACid:30214087	Pavir.Ia03444.1	3.198138	1.677232187	0.001007	30214087	Pavir.Ia03444.1	LOC_Os03g21040.2	stress responsive protein, putative, expressed	AT2G39050.1	hydroxyproline-rich glycoprotein family protein
B.RT	Pavir.Ia03444.2.p|PACid:30214088	Pavir.Ia03444.2	2.812913	1.492064934	0.000181	30214088	Pavir.Ia03444.2	LOC_Os03g21040.2	stress responsive protein, putative, expressed	AT2G39050.1	hydroxyproline-rich glycoprotein family protein
B.RT	Pavir.Ia03535.1.p|PACid:30211090	Pavir.Ia03535.1	4.882932	2.287747657	0.030314	30211090	Pavir.Ia03535.1	LOC_Os03g19290.1	mitochondrial import inner membrane translocase subunit Tim17, putative, expressed	AT4G16160.2	Mitochondrial import inner membrane translocase subunit Tim17/Tim22/Tim23 family protein
B.RT	Pavir.Ia03665.1.p|PACid:30210947	Pavir.Ia03665.1	7.439917	2.895286484	0.032179	30210947	Pavir.Ia03665.1	LOC_Os03g16920.1	DnaK family protein, putative, expressed	AT5G02500.1	heat shock cognate protein 70-1
B.RT	Pavir.Ia03678.1.p|PACid:30215378	Pavir.Ia03678.1	4.125429	2.044544124	0.00261	30215378	Pavir.Ia03678.1	LOC_Os03g20680.1	late embryogenesis abundant protein 1, putative, expressed	AT3G53040.1	late embryogenesis abundant protein, putative / LEA protein, putative
B.RT	Pavir.Ia04404.1.p|PACid:30211920	Pavir.Ia04404.1	8.949603	3.161823611	0.000258	30211920	Pavir.Ia04404.1	LOC_Os03g04080.1	expressed protein	AT5G42290.1	transcription activator-related
B.RT	Pavir.Ia04457.1.p|PACid:30209221	Pavir.Ia04457.1	4.283763	2.098878582	0.014825	30209221	Pavir.Ia04457.1	LOC_Os03g04060.1	CHIT16 - Chitinase family protein precursor, expressed	AT3G12500.1	basic chitinase
B.RT	Pavir.Ib00193.1.p|PACid:30238328	Pavir.Ib00193.1	5.57173	2.478125224	0.009169	30238328	Pavir.Ib00193.1	LOC_Os03g04060.1	CHIT16 - Chitinase family protein precursor, expressed	AT3G12500.1	basic chitinase
B.RT	Pavir.Ib00203.1.p|PACid:30238910	Pavir.Ib00203.1	2.401915	1.264185271	0.004032	30238910	Pavir.Ib00203.1	LOC_Os03g04250.1	glutathione S-transferase, putative, expressed	AT2G47730.1	glutathione S-transferase phi 8
B.RT	Pavir.Ib00352.1.p|PACid:30239823	Pavir.Ib00352.1	2.909188	1.540616767	0.004204	30239823	Pavir.Ib00352.1	LOC_Os03g04240.1	glutathione S-transferase, putative, expressed	AT2G47730.1	glutathione S-transferase phi 8
B.RT	Pavir.Ib00428.1.p|PACid:30242435	Pavir.Ib00428	13.34488	3.738213992	0.005888
B.RT	Pavir.Ib01026.1.p|PACid:30238031	Pavir.Ib01026.1	2.910075	1.541056532	0.029985	30238031	Pavir.Ib01026.1	LOC_Os03g14180.1	hsp20/alpha crystallin family protein, putative, expressed	AT4G27670.1	heat shock protein 21
B.RT	Pavir.Ib01136.1.p|PACid:30237887	Pavir.Ib01136.1	3.297803	1.721505221	0.01412	30237887	Pavir.Ib01136.1	LOC_Os03g15960.1	hsp20/alpha crystallin family protein, putative, expressed	AT3G46230.1	heat shock protein 17.4
B.RT	Pavir.Ib01269.1.p|PACid:30240572	Pavir.Ib01269.1	2.239616	1.163251547	0.007348
B.RT	Pavir.Ib01540.1.p|PACid:30237822	Pavir.Ib01540.1	5.398879	2.432659909	0.006559	30237822	Pavir.Ib01540.1	LOC_Os03g21260.1	2,3-bisphosphoglycerate-independent phosphoglycerate mutase, putative, expressed	AT3G08590.1	Phosphoglycerate mutase, 2,3-bisphosphoglycerate-independent
B.RT	Pavir.Ib01632.1.p|PACid:30237007	Pavir.Ib01632.1	0.299679	-1.738512007	0.037872	30237007	Pavir.Ib01632.1	LOC_Os03g25340.1	peroxidase precursor, putative, expressed	AT5G42180.1	Peroxidase superfamily protein
B.RT	Pavir.Ib02543.1.p|PACid:30241255	Pavir.Ib02543.1	2.90816	1.540106457	0.01461	30241255	Pavir.Ib02543.1	LOC_Os10g38140.1	glutathione S-transferase, putative, expressed	AT1G10370.1	Glutathione S-transferase family protein
B.RT	Pavir.Ib02745.1.p|PACid:30240470	Pavir.Ib02745.1	3.363823	1.750101726	0.001169
B.RT	Pavir.Ib03192.1.p|PACid:30238114	Pavir.Ib03192.1	2.415449	1.272291673	0.00043	30238114	Pavir.Ib03192.1	LOC_Os04g01590.1	arginase, putative, expressed	AT4G08900.1	arginase
B.RT	Pavir.Ib03633.1.p|PACid:30239106	Pavir.Ib03633.1	9.406286	3.233625153	0.004265
B.RT	Pavir.Ib03654.1.p|PACid:30243014	Pavir.Ib03654.1	2.638156	1.399530068	0.002622	30243014	Pavir.Ib03654.1	LOC_Os10g34920.1	secretory protein, putative, expressed	AT2G15220.1	Plant basic secretory protein (BSP) family protein
B.RT	Pavir.Ib03659.1.p|PACid:30242017	Pavir.Ib03659.1	3.7681	1.913837113	0.000263	30242017	Pavir.Ib03659.1	LOC_Os10g35070.1	alpha-galactosidase precursor, putative, expressed	AT5G08380.1	alpha-galactosidase 1
B.RT	Pavir.Ib03696.1.p|PACid:30241723	Pavir.Ib03696.1	3.994424	1.997987447	0.015924
B.RT	Pavir.J00130.1.p|PACid:30200135	Pavir.J00130.1	3.963234	1.986678027	0.000407	30200135	Pavir.J00130.1	LOC_Os04g26910.1	oxidoreductase, aldo/keto reductase family protein, putative, expressed	AT1G60730.1	NAD(P)-linked oxidoreductase superfamily protein
B.RT	Pavir.J00158.1.p|PACid:30282759	Pavir.J00158.1	14.23137	3.831002365	0.001949	30282759	Pavir.J00158.1	LOC_Os05g46480.1	late embryogenesis abundant protein, group 3, putative, expressed	AT3G15670.1	Late embryogenesis abundant protein (LEA) family protein
B.RT	Pavir.J00406.1.p|PACid:30195439	Pavir.J00406.1	2.243608	1.165820577	0.003047	30195439	Pavir.J00406.1	LOC_Os12g36240.1	inhibitor I family protein, putative, expressed	AT2G38870.1	Serine protease inhibitor, potato inhibitor I-type family protein
B.RT	Pavir.J00639.1.p|PACid:30255563	Pavir.J00639.1	3.567587	1.834948411	3.24e-05	30255563	Pavir.J00639.1	LOC_Os05g36290.1	actin, putative, expressed	AT5G09810.1	actin 7
B.RT	Pavir.J00683.1.p|PACid:30255035	Pavir.J00683.1	4.957376	2.30957662	0.000226	30255035	Pavir.J00683.1	LOC_Os01g62980.1	LTPL101 - Protease inhibitor/seed storage/LTP family protein precursor, expressed	AT5G05960.1	Bifunctional inhibitor/lipid-transfer protein/seed storage 2S albumin superfamily protein
B.RT	Pavir.J00825.1.p|PACid:30273963	Pavir.J00825.1	0.430005	-1.217574839	0.000422	30273963	Pavir.J00825.1	LOC_Os03g13180.1	peroxidase precursor, putative, expressed	AT5G06730.1	Peroxidase superfamily protein
B.RT	Pavir.J00839.1.p|PACid:30281656	Pavir.J00839.1	3.983384	1.993994402	0.003629
B.RT	Pavir.J00892.1.p|PACid:30275043	Pavir.J00892.1	11.48201	3.521302686	0.003163	30275043	Pavir.J00892.1	LOC_Os03g60580.1	actin-depolymerizing factor, putative, expressed	AT1G01750.1	actin depolymerizing factor 11
B.RT	Pavir.J00999.1.p|PACid:30308562	Pavir.J00999.1	30.73866	4.941982352	0.005634	30308562	Pavir.J00999.1	LOC_Os03g20680.1	late embryogenesis abundant protein 1, putative, expressed	AT2G36640.1	embryonic cell protein 63
B.RT	Pavir.J01051.1.p|PACid:30191168	Pavir.J01051.1	2.84997	1.510946879	0.002437	30191168	Pavir.J01051.1	LOC_Os09g33690.2	Os9bglu32 - beta-glucosidase homologue, similar to G. max hydroxyisourate hydrolase, expressed	AT1G02850.2	beta glucosidase 11
B.RT	Pavir.J01160.1.p|PACid:30306248	Pavir.J01160.1	7.804236	2.964257493	0.003567	30306248	Pavir.J01160.1	LOC_Os03g58170.1	stem-specific protein TSJT1, putative, expressed	AT3G22850.1	Aluminium induced protein with YGL and LRDR motifs
B.RT	Pavir.J01199.1.p|PACid:30263609	Pavir.J01199.1	4.080764	2.02883927	0.000941	30263609	Pavir.J01199.1	LOC_Os06g51084.1	1,4-alpha-glucan-branching enzyme, chloroplast precursor, putative, expressed	AT5G03650.1	starch branching enzyme 2.2
B.RT	Pavir.J01373.1.p|PACid:30219389	Pavir.J01373.1	0.314551	-1.668633971	0.025827	30219389	Pavir.J01373.1	LOC_Os08g43580.1	acyl carrier protein, putative, expressed	AT1G54580.1	acyl carrier protein 2
B.RT	Pavir.J01384.1.p|PACid:30255517	Pavir.J01384.1	0.386385	-1.371887239	0.012955	30255517	Pavir.J01384.1	LOC_Os03g50560.1	RNA recognition motif containing protein, putative, expressed	AT4G17720.1	RNA-binding (RRM/RBD/RNP motifs) family protein
B.RT	Pavir.J01484.1.p|PACid:30198494	Pavir.J01484.1	0.449325	-1.1541673	0.039805	30198494	Pavir.J01484.1	LOC_Os05g51640.1	adhesion regulating molecule family, putative, expressed	AT2G26590.1	regulatory particle non-ATPase 13
B.RT	Pavir.J01632.1.p|PACid:30273203	Pavir.J01632.1	3.141099	1.651269396	0.000715	30273203	Pavir.J01632.1	LOC_Os05g35740.1	subtilisin N-terminal Region family protein, expressed	AT1G71950.1	Proteinase inhibitor, propeptide
B.RT	Pavir.J01866.1.p|PACid:30284124	Pavir.J01866.1	2.509864	1.327609064	0.004106	30284124	Pavir.J01866.1	LOC_Os04g24430.1	sucrose synthase, putative, expressed	AT1G73370.1	sucrose synthase 6
B.RT	Pavir.J01936.1.p|PACid:30195714	Pavir.J01936.1	3.677252	1.878628008	0.00167	30195714	Pavir.J01936.1	LOC_Os02g51710.1	wound/stress protein, putative, expressed	AT4G39730.1	Lipase/lipooxygenase, PLAT/LH2 family protein
B.RT	Pavir.J01963.1.p|PACid:30218288	Pavir.J01963.1	0.350896	-1.510882882	0.006102	30218288	Pavir.J01963.1	LOC_Os09g31486.1	DnaK family protein, putative, expressed	AT5G09590.1	mitochondrial HSO70 2
B.RT	Pavir.J02312.1.p|PACid:30294775	Pavir.J02312.1	6.427769	2.684318033	0.002512	30294775	Pavir.J02312.1	LOC_Os05g39250.1	phosphatidylethanolamine-binding protein, putative, expressed	AT5G01300.1	PEBP (phosphatidylethanolamine-binding protein) family protein
B.RT	Pavir.J02395.1.p|PACid:30315736	Pavir.J02395.1	2.414991	1.272017843	0.026483	30315736	Pavir.J02395.1	LOC_Os05g44340.1	heat shock protein 101, putative, expressed	AT1G74310.1	heat shock protein 101
B.RT	Pavir.J02529.1.p|PACid:30225526	Pavir.J02529.1	3.197552	1.67696799	0.024461	30225526	Pavir.J02529.1	LOC_Os05g04870.1	oxidoreductase, short chain dehydrogenase/reductase family protein, putative, expressed	AT1G54870.1	NAD(P)-binding Rossmann-fold superfamily protein
B.RT	Pavir.J02614.1.p|PACid:30306905	Pavir.J02614.1	2.951485	1.561441107	0.001057	30306905	Pavir.J02614.1	LOC_Os03g57200.1	glutathione S-transferase, putative, expressed	AT1G17180.1	glutathione S-transferase TAU 25
B.RT	Pavir.J03092.1.p|PACid:30216516	Pavir.J03092.1	5.519458	2.46452665	0.000545	30216516	Pavir.J03092.1	LOC_Os05g38640.1	Core histone H2A/H2B/H3/H4 domain containing protein, putative, expressed	AT5G02560.1	histone H2A 12
B.RT	Pavir.J03658.1.p|PACid:30284254	Pavir.J03658.1	2.307888	1.206573208	0.00779	30284254	Pavir.J03658.1	LOC_Os05g47446.1	expressed protein	AT1G29850.1	double-stranded DNA-binding family protein
B.RT	Pavir.J04109.1.p|PACid:30256957	Pavir.J04109.1	0.322534	-1.632475578	0.02622	30256957	Pavir.J04109.1	LOC_Os08g43580.1	acyl carrier protein, putative, expressed	AT1G54580.1	acyl carrier protein 2
B.RT	Pavir.J04506.2.p|PACid:30271067	Pavir.J04506.2	0.281993	-1.826266268	0.000325	30271067	Pavir.J04506.2	LOC_Os03g21940.1	60S ribosomal protein L19-3, putative, expressed	AT1G02780.1	Ribosomal protein L19e family protein
B.RT	Pavir.J06494.1.p|PACid:30286195	Pavir.J06494.1	4.813923	2.26721297	0.005156	30286195	Pavir.J06494.1	LOC_Os03g41060.1	GASR2 - Gibberellin-regulated GASA/GAST/Snakin family protein precursor, putative, expressed	AT2G14900.1	Gibberellin-regulated family protein
B.RT	Pavir.J06823.1.p|PACid:30294236	Pavir.J06823.1	2.865845	1.518960454	0.00224	30294236	Pavir.J06823.1	LOC_Os06g06550.1	plant protein of unknown function domain containing protein, expressed	AT3G02645.1	Plant protein of unknown function (DUF247)
B.RT	Pavir.J07576.1.p|PACid:30308383	Pavir.J07576.1	2.744042	1.456302325	0.001241	30308383	Pavir.J07576.1	LOC_Os06g45710.1	phosphoglycerate kinase protein, putative, expressed	AT1G79550.1	phosphoglycerate kinase
B.RT	Pavir.J08185.1.p|PACid:30185137	Pavir.J08185.1	6.859249	2.778050661	0.008794	30185137	Pavir.J08185.1	LOC_Os01g19770.1	mitochondrial import inner membrane translocase subunit Tim17, putative, expressed	AT4G16160.2	Mitochondrial import inner membrane translocase subunit Tim17/Tim22/Tim23 family protein
B.RT	Pavir.J08192.1.p|PACid:30281565	Pavir.J08192.1	2.282936	1.190890586	0.000222	30281565	Pavir.J08192.1	LOC_Os10g39680.1	CHIT14 - Chitinase family protein precursor, expressed	AT3G12500.1	basic chitinase
B.RT	Pavir.J08319.1.p|PACid:30216763	Pavir.J08319.1	2.823805	1.497640328	0.008366	30216763	Pavir.J08319.1	LOC_Os04g51270.1	vacuolar ATPase G subunit, putative, expressed	AT3G01390.1	vacuolar membrane ATPase 10
B.RT	Pavir.J08343.1.p|PACid:30273449	Pavir.J08343.1	4.3463	2.11978782	0.00397	30273449	Pavir.J08343.1	LOC_Os05g06780.1	LTPL104 - Protease inhibitor/seed storage/LTP family protein precursor, expressed	AT5G05960.1	Bifunctional inhibitor/lipid-transfer protein/seed storage 2S albumin superfamily protein
B.RT	Pavir.J08876.1.p|PACid:30275693	Pavir.J08876.1	5.154582	2.365855524	0.003968	30275693	Pavir.J08876.1	LOC_Os06g51060.1	CHIT8 - Chitinase family protein precursor, expressed	AT3G12500.1	basic chitinase
B.RT	Pavir.J08895.1.p|PACid:30257540	Pavir.J08895.1	2.806824	1.48893849	0.004713	30257540	Pavir.J08895.1	LOC_Os12g12560.1	NADP-dependent oxidoreductase, putative, expressed	AT3G03080.1	Zinc-binding dehydrogenase family protein
B.RT	Pavir.J09198.1.p|PACid:30218083	Pavir.J09198.1	2.466433	1.302426105	0.010871	30218083	Pavir.J09198.1	LOC_Os05g50380.1	glucose-1-phosphate adenylyltransferase large subunit, chloroplast precursor, putative, expressed	AT1G27680.1	ADPGLC-PPase large subunit
B.RT	Pavir.J09458.1.p|PACid:30231778	Pavir.J09458.1	6.796111	2.764709473	3.91e-05	30231778	Pavir.J09458.1	LOC_Os04g41680.1	CHIT3 - Chitinase family protein precursor, expressed	AT3G54420.1	homolog of carrot EP3-3 chitinase
B.RT	Pavir.J09661.1.p|PACid:30284642	Pavir.J09661.1	2.461761	1.299690989	0.001602
B.RT	Pavir.J09784.1.p|PACid:30274978	Pavir.J09784.1	3.312269	1.727819919	0.000423
B.RT	Pavir.J10133.1.p|PACid:30243454	Pavir.J10133.1	3.225908	1.689705482	0.001506	30243454	Pavir.J10133.1	LOC_Os09g12660.1	glucose-1-phosphate adenylyltransferase large subunit, chloroplast precursor, putative, expressed	AT5G48300.1	ADP glucose pyrophosphorylase 1
B.RT	Pavir.J10323.1.p|PACid:30190884	Pavir.J10323.1	0.383003	-1.384571484	0.004093	30190884	Pavir.J10323.1	LOC_Os01g39860.1	1-aminocyclopropane-1-carboxylate oxidase protein, putative, expressed	AT2G19590.1	ACC oxidase 1
B.RT	Pavir.J10328.1.p|PACid:30314966	Pavir.J10328.1	3.028581	1.598642099	0.002012	30314966	Pavir.J10328.1	LOC_Os02g33730.1	ubiquinol-cytochrome C reductase hinge protein, putative, expressed	AT1G15120.2	Ubiquinol-cytochrome C reductase hinge protein
B.RT	Pavir.J10403.1.p|PACid:30271807	Pavir.J10403.1	0.274732	-1.863903595	0.02091	30271807	Pavir.J10403.1	LOC_Os02g40664.1	zinc finger family protein, putative, expressed	AT5G60710.1	Zinc finger (C3HC4-type RING finger) family protein
B.RT	Pavir.J11658.1.p|PACid:30207612	Pavir.J11658.1	6.885676	2.78359821	0.014641	30207612	Pavir.J11658.1	LOC_Os03g19290.1	mitochondrial import inner membrane translocase subunit Tim17, putative, expressed	AT4G16160.2	Mitochondrial import inner membrane translocase subunit Tim17/Tim22/Tim23 family protein
B.RT	Pavir.J13075.1.p|PACid:30246880	Pavir.J13075.1	20.50829	4.358135093	0.007019	30246880	Pavir.J13075.1	LOC_Os11g26790.1	dehydrin, putative, expressed	AT5G66400.1	Dehydrin family protein
B.RT	Pavir.J13364.1.p|PACid:30256564	Pavir.J13364.1	7.169153	2.841802694	0.017033
B.RT	Pavir.J13410.1.p|PACid:30208196	Pavir.J13410.1	2.94718	1.559335203	0.002743	30208196	Pavir.J13410.1	LOC_Os07g48460.1	stress responsive protein, putative, expressed	AT2G39050.1	hydroxyproline-rich glycoprotein family protein
B.RT	Pavir.J14586.1.p|PACid:30254928	Pavir.J14586.1	2.938178	1.55492199	0.000207	30254928	Pavir.J14586.1	LOC_Os02g02400.1	catalase isozyme A, putative, expressed	AT1G20630.1	catalase 1
B.RT	Pavir.J15479.1.p|PACid:30208673	Pavir.J15479.1	3.671698	1.876447377	0.00284	30208673	Pavir.J15479.1	LOC_Os09g30240.1	phosphofructokinase, putative, expressed	AT5G47810.1	phosphofructokinase 2
B.RT	Pavir.J15786.1.p|PACid:30195529	Pavir.J15786.1	3.534788	1.821623783	0.008814	30195529	Pavir.J15786.1	LOC_Os01g73220.1	peroxidase precursor, putative, expressed	AT1G71695.1	Peroxidase superfamily protein
B.RT	Pavir.J15793.1.p|PACid:30248019	Pavir.J15793.1	2.886622	1.529382042	0.006835	30248019	Pavir.J15793.1	LOC_Os12g02980.2	nucleoside-triphosphatase, putative, expressed	AT5G18280.1	apyrase 2
B.RT	Pavir.J15860.1.p|PACid:30275456	Pavir.J15860.1	3.675061	1.877768226	0.003782	30275456	Pavir.J15860.1	LOC_Os05g39690.1	oxidoreductase, aldo/keto reductase family protein, putative, expressed	AT2G37770.2	NAD(P)-linked oxidoreductase superfamily protein
B.RT	Pavir.J16347.1.p|PACid:30307684	Pavir.J16347.1	8.698435	3.120755816	0.011612	30307684	Pavir.J16347.1	LOC_Os03g60580.1	actin-depolymerizing factor, putative, expressed	AT1G01750.1	actin depolymerizing factor 11
B.RT	Pavir.J17463.1.p|PACid:30282282	Pavir.J17463.1	2.253743	1.172323081	0.005179	30282282	Pavir.J17463.1	LOC_Os04g41680.1	CHIT3 - Chitinase family protein precursor, expressed	AT3G54420.1	homolog of carrot EP3-3 chitinase
B.RT	Pavir.J17471.1.p|PACid:30294892	Pavir.J17471.1	3.478041	1.798274937	0.000141	30294892	Pavir.J17471.1	LOC_Os08g08970.1	Cupin domain containing protein, expressed	AT5G39110.1	RmlC-like cupins superfamily protein
B.RT	Pavir.J17816.1.p|PACid:30285619	Pavir.J17816.1	2.241525	1.16448045	0.001073	30285619	Pavir.J17816.1	LOC_Os02g54254.1	saccharopine dehydrogenase, putative, expressed	AT4G33150.1	lysine-ketoglutarate reductase/saccharopine dehydrogenase bifunctional enzyme
B.RT	Pavir.J18194.1.p|PACid:30255395	Pavir.J18194.1	4.778242	2.256479911	5.95e-05	30255395	Pavir.J18194.1	LOC_Os02g33390.1	pectinesterase inhibitor domain containing protein, putative, expressed	AT5G46940.1	Plant invertase/pectin methylesterase inhibitor superfamily protein
B.RT	Pavir.J18613.1.p|PACid:30247167	Pavir.J18613.1	4.607918	2.204115017	0.005849
B.RT	Pavir.J18834.1.p|PACid:30275849	Pavir.J18834.1	3.788213	1.921517578	0.013188
B.RT	Pavir.J19600.1.p|PACid:30274742	Pavir.J19600.1	6.658781	2.73525815	0.012589	30274742	Pavir.J19600.1	LOC_Os06g23350.1	late embryogenesis abundant protein D-34, putative, expressed	AT3G22490.1	Seed maturation protein
B.RT	Pavir.J19751.1.p|PACid:30274240	Pavir.J19751.1	4.427923	2.146630244	0.002706	30274240	Pavir.J19751.1	LOC_Os11g44810.1	auxin-repressed protein, putative, expressed	AT1G28330.1	dormancy-associated protein-like 1
B.RT	Pavir.J19824.1.p|PACid:30189354	Pavir.J19824.1	3.291631	1.718802789	0.034249	30189354	Pavir.J19824.1	LOC_Os01g04360.1	hsp20/alpha crystallin family protein, putative, expressed	AT5G59720.1	heat shock protein 18.2
B.RT	Pavir.J20172.1.p|PACid:30266975	Pavir.J20172.1	4.193505	2.068156582	0.024516	30266975	Pavir.J20172.1	LOC_Os09g29200.1	glutathione S-transferase, putative, expressed	AT3G09270.1	glutathione S-transferase TAU 8
B.RT	Pavir.J20981.1.p|PACid:30246326	Pavir.J20981.1	4.440601	2.15075482	0.021307
B.RT	Pavir.J21027.1.p|PACid:30247869	Pavir.J21027.1	2.416297	1.272797567	0.015265
B.RT	Pavir.J21349.1.p|PACid:30225604	Pavir.J21349.1	4.328164	2.113755	0.010104	30225604	Pavir.J21349.1	LOC_Os02g54140.1	hsp20/alpha crystallin family protein, putative, expressed	AT1G54050.1	HSP20-like chaperones superfamily protein
B.RT	Pavir.J21738.1.p|PACid:30197325	Pavir.J21738.1	2.560113	1.35620776	0.001398
B.RT	Pavir.J22241.1.p|PACid:30302017	Pavir.J22241.1	3.58783	1.843111373	0.000541	30302017	Pavir.J22241.1	LOC_Os08g44250.1	fiber protein Fb14, putative, expressed	AT3G62790.1	NADH-ubiquinone oxidoreductase-related
B.RT	Pavir.J22570.1.p|PACid:30308575	Pavir.J22570.1	2.709607	1.438083682	0.004058	30308575	Pavir.J22570.1	LOC_Os01g49720.1	glutathione S-transferase, putative, expressed	AT1G10360.1	glutathione S-transferase TAU 18
B.RT	Pavir.J24083.1.p|PACid:30202376	Pavir.J24083.1	0.408394	-1.291966114	0.004599	30202376	Pavir.J24083.1	LOC_Os10g29470.1	dehydrogenase, putative, expressed	AT4G37990.1	elicitor-activated gene 3-2
B.RT	Pavir.J24136.1.p|PACid:30306717	Pavir.J24136.1	3.200233	1.678176951	0.00336	30306717	Pavir.J24136.1	LOC_Os05g02530.1	glutathione S-transferase, N-terminal domain containing protein, expressed	AT1G75270.1	dehydroascorbate reductase 2
B.RT	Pavir.J24201.1.p|PACid:30188906	Pavir.J24201.1	0.38563	-1.37471146	0.032351	30188906	Pavir.J24201.1	LOC_Os03g25360.1	peroxidase precursor, putative, expressed	AT5G42180.1	Peroxidase superfamily protein
B.RT	Pavir.J24327.1.p|PACid:30256877	Pavir.J24327.1	2.825087	1.498295291	0.008282	30256877	Pavir.J24327.1	LOC_Os10g38740.1	glutathione S-transferase, putative, expressed	AT1G10370.1	Glutathione S-transferase family protein
B.RT	Pavir.J24812.1.p|PACid:30294359	Pavir.J24812.1	2.540143	1.344909863	0.00085	30294359	Pavir.J24812.1	LOC_Os03g27310.1	histone H3, putative, expressed	AT4G40030.2	Histone superfamily protein
B.RT	Pavir.J24821.1.p|PACid:30277014	Pavir.J24821.1	2.429221	1.280493624	0.049359	30277014	Pavir.J24821.1	LOC_Os01g50910.1	late embryogenesis abundant protein, group 3, putative, expressed	AT1G52690.1	Late embryogenesis abundant protein (LEA) family protein
B.RT	Pavir.J25726.1.p|PACid:30194791	Pavir.J25726.1	3.802682	1.927017238	0.01591
B.RT	Pavir.J25812.1.p|PACid:30220787	Pavir.J25812.1	2.750961	1.45993586	0.009065	30220787	Pavir.J25812.1	LOC_Os05g38230.2	oxidoreductase, aldo/keto reductase family protein, putative, expressed	AT2G37770.2	NAD(P)-linked oxidoreductase superfamily protein
B.RT	Pavir.J28528.1.p|PACid:30277792	Pavir.J28528.1	2.210955	1.144669815	0.00499
B.RT	Pavir.J28600.1.p|PACid:30202435	Pavir.J28600.1	9.691441	3.276711245	0.018382	30202435	Pavir.J28600.1	LOC_Os03g07180.1	embryonic protein DC-8, putative, expressed	AT4G36600.1	Late embryogenesis abundant (LEA) protein
B.RT	Pavir.J28620.1.p|PACid:30314458	Pavir.J28620.1	2.640838	1.400996035	0.000186	30314458	Pavir.J28620.1	LOC_Os06g25010.1	glycosyl hydrolase, putative, expressed	AT5G24090.1	chitinase A
B.RT	Pavir.J29127.1.p|PACid:30284872	Pavir.J29127.1	3.46644	1.793454907	0.012039
B.RT	Pavir.J29514.1.p|PACid:30196199	Pavir.J29514.1	2.910604	1.541318786	0.017502	30196199	Pavir.J29514.1	LOC_Os02g12610.1	hsp20/alpha crystallin family protein, putative, expressed	AT5G12030.1	heat shock protein 17.6A
B.RT	Pavir.J31110.1.p|PACid:30201037	Pavir.J31110.1	4.94969	2.307338085	0.00183
B.RT	Pavir.J31129.1.p|PACid:30225767	Pavir.J31129.1	2.632186	1.396261569	0.008697	30225767	Pavir.J31129.1	LOC_Os12g38120.1	thaumatin family domain containing protein, expressed	AT2G28790.1	Pathogenesis-related thaumatin superfamily protein
B.RT	Pavir.J31186.1.p|PACid:30216617	Pavir.J31186.1	3.847767	1.9440214	0.002902	30216617	Pavir.J31186.1	LOC_Os11g37950.1	WIP3 - Wound-induced protein precursor, expressed	AT3G04720.1	pathogenesis-related 4
B.RT	Pavir.J31192.1.p|PACid:30274917	Pavir.J31192.1	0.424348	-1.236679168	0.005311	30274917	Pavir.J31192.1	LOC_Os07g08710.1	AT hook-containing DNA-binding protein, putative, expressed	AT1G06760.1	winged-helix DNA-binding transcription factor family protein
B.RT	Pavir.J31919.1.p|PACid:30199244	Pavir.J31919.1	6.281663	2.651146437	0.012581	30199244	Pavir.J31919.1	LOC_Os10g36180.1	expressed protein	AT5G52300.2	CAP160 protein
B.RT	Pavir.J33685.1.p|PACid:30190217	Pavir.J33685.1	2.398501	1.262132922	0.019211	30190217	Pavir.J33685.1	LOC_Os07g48500.1	stress responsive protein, putative, expressed	AT2G39050.1	hydroxyproline-rich glycoprotein family protein
B.RT	Pavir.J33952.1.p|PACid:30281345	Pavir.J33952.1	3.37768	1.756032634	0.001536	30281345	Pavir.J33952.1	LOC_Os01g34700.1	dienelactone hydrolase family protein, expressed	AT2G32520.1	alpha/beta-Hydrolases superfamily protein
B.RT	Pavir.J33969.1.p|PACid:30244750	Pavir.J33969.1	0.413113	-1.275391714	0.009601	30244750	Pavir.J33969.1	LOC_Os04g42580.1	carboxyvinyl-carboxyphosphonate phosphorylmutase, putative, expressed	AT2G43180.1	Phosphoenolpyruvate carboxylase family protein
B.RT	Pavir.J34655.1.p|PACid:30270543	Pavir.J34655.1	3.073822	1.620033436	0.00722	30270543	Pavir.J34655.1	LOC_Os01g62870.1	oxidoreductase, aldo/keto reductase family protein, putative, expressed	AT2G37770.2	NAD(P)-linked oxidoreductase superfamily protein
B.RT	Pavir.J34849.1.p|PACid:30255001	Pavir.J34849.1	4.466092	2.159013051	0.007337	30255001	Pavir.J34849.1	LOC_Os11g37970.1	WIP5 - Wound-induced protein precursor, expressed	AT3G04720.1	pathogenesis-related 4
B.RT	Pavir.J35962.1.p|PACid:30296188	Pavir.J35962.1	2.380426	1.251219965	0.000343	30296188	Pavir.J35962.1	LOC_Os07g05570.1	ERD4 protein, putative, expressed	AT1G30360.1	Early-responsive to dehydration stress protein (ERD4)
B.RT	Pavir.J36542.1.p|PACid:30207798	Pavir.J36542.1	2.649595	1.405771614	0.00054	30207798	Pavir.J36542.1	LOC_Os01g71080.1	xylanase inhibitor, putative, expressed	AT1G03230.1	Eukaryotic aspartyl protease family protein
B.RT	Pavir.J36772.1.p|PACid:30203019	Pavir.J36772.1	6.051627	2.597322997	1.47e-05	30203019	Pavir.J36772.1	LOC_Os04g09390.1	HEV3 - Hevein family protein precursor, expressed	AT3G04720.1	pathogenesis-related 4
B.RT	Pavir.J37198.1.p|PACid:30267363	Pavir.J37198.1	2.319124	1.213579754	2.09e-05	30267363	Pavir.J37198.1	LOC_Os04g53850.1	leucoanthocyanidin reductase, putative, expressed	AT1G61720.1	NAD(P)-binding Rossmann-fold superfamily protein
B.RT	Pavir.J37309.1.p|PACid:30271745	Pavir.J37309.1	2.807704	1.489391095	0.00021	30271745	Pavir.J37309.1	LOC_Os01g55950.1	acetamidase, putative, expressed	AT4G37560.1	Acetamidase/Formamidase family protein
B.RT	Pavir.J37362.1.p|PACid:30294839	Pavir.J37362.1	3.321189	1.73169977	0.018236	30294839	Pavir.J37362.1	LOC_Os05g44340.1	heat shock protein 101, putative, expressed	AT1G74310.1	heat shock protein 101
B.RT	Pavir.J37373.1.p|PACid:30197704	Pavir.J37373.1	3.552587	1.828870031	0.002405
B.RT	Pavir.J37948.1.p|PACid:30271721	Pavir.J37948.1	2.296784	1.199615345	0.004725	30271721	Pavir.J37948.1	LOC_Os01g48280.1	ubiquitin-conjugating enzyme, putative, expressed	AT1G16890.2	ubiquitin-conjugating enzyme 36
B.RT	Pavir.J38252.1.p|PACid:30191144	Pavir.J38252.1	3.877465	1.9551138	0.000131	30191144	Pavir.J38252.1	LOC_Os01g58194.1	protein disulfide isomerase, putative, expressed	AT1G60420.1	DC1 domain-containing protein
B.RT	Pavir.J38942.1.p|PACid:30276533	Pavir.J38942.1	3.115418	1.63942584	0.021755	30276533	Pavir.J38942.1	LOC_Os03g11910.1	DnaK family protein, putative, expressed	AT2G32120.1	heat-shock protein 70T-2
B.RT	Pavir.J40233.1.p|PACid:30244149	Pavir.J40233.1	2.890715	1.531426544	0.006361
B.RT	Pavir.J40704.1.p|PACid:30246796	Pavir.J40704.1	2.653008	1.407629114	0.016504	30246796	Pavir.J40704.1	LOC_Os05g44340.1	heat shock protein 101, putative, expressed	AT1G74310.1	heat shock protein 101
C.E	Pavir.Aa00504.1.p|PACid:30253559	Pavir.Aa00504.1	2.12970045	1.090650523	0.01703166	30253559	Pavir.Aa00504.1	LOC_Os02g51750.1	annexin, putative, expressed	AT5G10230.1	annexin 7
C.E	Pavir.Aa01296.1.p|PACid:30251956	Pavir.Aa01296.1	2.08076909	1.057116872	0.02976346	30251956	Pavir.Aa01296.1	LOC_Os02g40500.1	OsGrx_C2.1 - glutaredoxin subgroup I, expressed	AT5G40370.1	Glutaredoxin family protein
C.E	Pavir.Aa01523.1.p|PACid:30251258	Pavir.Aa01523.1	2.63338755	1.396919857	0.00393292	30251258	Pavir.Aa01523.1	LOC_Os02g37470.1	tetratricopeptide repeat containing protein, putative, expressed	AT3G14110.3	Tetratricopeptide repeat (TPR)-like superfamily protein
C.E	Pavir.Aa01534.1.p|PACid:30249831	Pavir.Aa01534.1	0.45250856	-1.143983	0.03721496	30249831	Pavir.Aa01534.1	LOC_Os02g36974.1	14-3-3 protein, putative, expressed	AT3G02520.1	general regulatory factor 7
C.E	Pavir.Aa02034.1.p|PACid:30250807	Pavir.Aa02034.1	0.49749975	-1.007232298	0.0496103	30250807	Pavir.Aa02034.1	LOC_Os02g32814.1	heavy metal-associated domain containing protein, expressed	AT3G56240.1	copper chaperone
C.E	Pavir.Ab00294.1.p|PACid:30233308	Pavir.Ab00294.1	3.15017222	1.655430702	0.01820825	30233308	Pavir.Ab00294.1	LOC_Os02g03860.1	mitochondrial ATP synthase precursor, putative, expressed	AT2G21870.1	copper ion binding;cobalt ion binding;zinc ion binding
C.E	Pavir.Ab00560.1.p|PACid:30234865	Pavir.Ab00560.1	2.06225944	1.044225841	0.02841939	30234865	Pavir.Ab00560.1	LOC_Os02g08410.1	chorismate mutase, chloroplast precursor, putative, expressed	AT5G10870.1	chorismate mutase 2
C.E	Pavir.Ab02118.1.p|PACid:30234030	Pavir.Ab02118.1	0.48182466	-1.053419871	0.04192524	30234030	Pavir.Ab02118.1	LOC_Os02g36340.1	riboflavin biosynthesis protein ribAB, chloroplast precursor, putative, expressed	AT5G64300.1	GTP cyclohydrolase II
C.E	Pavir.Ab02462.1.p|PACid:30232733	Pavir.Ab02462.1	2.27849863	1.188083502	0.00397031	30232733	Pavir.Ab02462.1	LOC_Os02g43660.1	plastocyanin-like domain containing protein, putative, expressed	AT2G32300.1	uclacyanin 1
C.E	Pavir.Ab03010.1.p|PACid:30233724	Pavir.Ab03010.1	2.4998792	1.32185838	0.01458274	30233724	Pavir.Ab03010.1	LOC_Os02g57670.1	ribosomal L9, putative, expressed	AT3G44890.1	ribosomal protein L9
C.E	Pavir.Ab03352.1.p|PACid:30236161	Pavir.Ab03352.1	2.25433981	1.172705001	0.0316233
C.E	Pavir.Ba01379.1.p|PACid:30293316	Pavir.Ba01379.1	2.07764675	1.054950379	0.00843515	30293316	Pavir.Ba01379.1	LOC_Os09g37910.1	HMG1/2, putative, expressed	AT1G20696.3	high mobility group B3
C.E	Pavir.Ba02513.1.p|PACid:30291214	Pavir.Ba02513.1	2.60333056	1.38035851	0.00599236
C.E	Pavir.Ba03764.2.p|PACid:30291069	Pavir.Ba03764.2	2.24563577	1.167123948	0.00173571
C.E	Pavir.Bb00004.1.p|PACid:30300080	Pavir.Bb00004.1	3.39858088	1.764932457	0.00044628	30300080	Pavir.Bb00004.1	LOC_Os07g02480.1	expressed protein	AT5G45470.1	Protein of unknown function (DUF594)
C.E	Pavir.Bb00468.1.p|PACid:30298354	Pavir.Bb00468.1	2.987509	1.578943057	0.02277955	30298354	Pavir.Bb00468.1	LOC_Os07g08210.2	cytidylyltransferase domain containing protein, expressed	AT2G18250.1	4-phosphopantetheine adenylyltransferase
C.E	Pavir.Bb00970.1.p|PACid:30298835	Pavir.Bb00970.1	2.30205908	1.202924858	0.02574789	30298835	Pavir.Bb00970.1	LOC_Os07g26110.1	membrane associated DUF588 domain containing protein, putative, expressed	AT4G15610.1	Uncharacterised protein family (UPF0497)
C.E	Pavir.Bb01462.1.p|PACid:30298020	Pavir.Bb01462.1	2.01147757	1.008255648	0.00228858	30298020	Pavir.Bb01462.1	LOC_Os09g02270.1	cyclase family protein, putative, expressed	AT4G34180.1	Cyclase family protein
C.E	Pavir.Bb01836.1.p|PACid:30300579	Pavir.Bb01836.1	2.38801382	1.255811185	0.00242424	30300579	Pavir.Bb01836.1	LOC_Os02g44108.1	expansin precursor, putative, expressed	AT2G45110.1	expansin B4
C.E	Pavir.Bb02672.1.p|PACid:30301689	Pavir.Bb02672.1	2.25120457	1.17069716	0.00045146	30301689	Pavir.Bb02672.1	LOC_Os09g36700.1	ribonuclease T2 family domain containing protein, expressed	AT1G14220.1	Ribonuclease T2 family protein
C.E	Pavir.Bb03649.1.p|PACid:30296554	Pavir.Bb03649.1	2.46741241	1.302998872	0.02102697	30296554	Pavir.Bb03649.1	LOC_Os07g46990.1	copper/zinc superoxide dismutase, putative, expressed	AT1G08830.1	copper/zinc superoxide dismutase 1
C.E	Pavir.Bb03712.1.p|PACid:30298686	Pavir.Bb03712.1	0.44648628	-1.163312245	0.0495102	30298686	Pavir.Bb03712.1	LOC_Os07g48770.1	serine hydrolase domain containing protein, expressed	AT2G27030.3	calmodulin 5
C.E	Pavir.Ca00525.1.p|PACid:30206362	Pavir.Ca00525.1	2.03775759	1.026982441	0.00988379	30206362	Pavir.Ca00525.1	LOC_Os05g01810.1	xylem cysteine proteinase 2 precursor, putative, expressed	AT1G20850.1	xylem cysteine peptidase 2
C.E	Pavir.Ca02021.1.p|PACid:30203609	Pavir.Ca02021.1	0.45112083	-1.148414204	0.00503913	30203609	Pavir.Ca02021.1	LOC_Os09g07900.1	ubiquitin-protein ligase 1, putative, expressed	AT1G55860.2	ubiquitin-protein ligase 1
C.E	Pavir.Cb00229.1.p|PACid:30268812	Pavir.Cb00229.1	0.46984253	-1.089750793	0.01692198	30268812	Pavir.Cb00229.1	LOC_Os12g19290.1	AGC_AGC_other_NDRh_TRCd.4 - ACG kinases include homologs to PKA, PKG and PKC, expressed	AT2G20470.1	AGC (cAMP-dependent, cGMP-dependent and protein kinase C) kinase family protein
C.E	Pavir.Cb00981.1.p|PACid:30267482	Pavir.Cb00981.1	0.46515804	-1.104207139	0.00629267	30267482	Pavir.Cb00981.1	LOC_Os09g07900.1	ubiquitin-protein ligase 1, putative, expressed	AT1G55860.2	ubiquitin-protein ligase 1
C.E	Pavir.Da00391.1.p|PACid:30192487	Pavir.Da00391.1	0.48654393	-1.03935801	0.00687802	30192487	Pavir.Da00391.1	LOC_Os06g45500.1	copper-transporting ATPase, putative, expressed	AT5G44790.1	copper-exporting ATPase / responsive-to-antagonist 1 / copper-transporting ATPase (RAN1)
C.E	Pavir.Da01194.1.p|PACid:30192409	Pavir.Da01194.1	2.57853641	1.366552415	0.01922355	30192409	Pavir.Da01194.1	LOC_Os06g13100.1	CREG1 precursor, putative, expressed	AT2G04690.1	Pyridoxamine 5\'-phosphate oxidase family protein
C.E	Pavir.Da01207.1.p|PACid:30193798	Pavir.Da01207.1	3.72965253	1.89904123	0.00127671	30193798	Pavir.Da01207.1	LOC_Os06g13720.1	dehydrogenase E1 component domain containing protein, expressed	AT1G24180.1	Thiamin diphosphate-binding fold (THDP-binding) superfamily protein
C.E	Pavir.Da01876.1.p|PACid:30194692	Pavir.Da01876.1	2.01350838	1.009711477	0.00702033	30194692	Pavir.Da01876.1	LOC_Os06g08670.1	glutathione peroxidase, putative, expressed	AT2G25080.1	glutathione peroxidase 1
C.E	Pavir.Db00176.1.p|PACid:30262908	Pavir.Db00176.1	2.13812254	1.09634454	0.01173774	30262908	Pavir.Db00176.1	LOC_Os06g50000.1	LYR motif containing protein, putative, expressed	AT4G34700.1	LYR family of Fe/S cluster biogenesis protein
C.E	Pavir.Db00677.1.p|PACid:30262371	Pavir.Db00677.1	2.48292368	1.312039917	0.03875099	30262371	Pavir.Db00677.1	LOC_Os06g43430.1	cytochrome P450, putative, expressed	AT3G26210.1	cytochrome P450, family 71, subfamily B, polypeptide 23
C.E	Pavir.Db01908.1.p|PACid:30263196	Pavir.Db01908.1	2.06192919	1.043994792	0.00092212	30263196	Pavir.Db01908.1	LOC_Os06g12630.1	glutathione S-transferase, N-terminal domain containing protein, expressed	AT5G16710.1	dehydroascorbate reductase 1
C.E	Pavir.Db02396.1.p|PACid:30260752	Pavir.Db02396.1	2.39847493	1.262117361	0.02866938	30260752	Pavir.Db02396.1	LOC_Os08g06550.1	acyl CoA binding protein, putative, expressed	AT1G31812.1	acyl-CoA-binding protein 6
C.E	Pavir.Ea03827.1.p|PACid:30229491	Pavir.Ea03827.1	2.48492736	1.313203681	0.0169476	30229491	Pavir.Ea03827.1	LOC_Os01g70770.1	glutathione S-transferase, putative, expressed	AT3G62760.1	Glutathione S-transferase family protein
C.E	Pavir.Ea03945.1.p|PACid:30231586	Pavir.Ea03945.1	2.35455219	1.235452699	0.00092984	30231586	Pavir.Ea03945.1	LOC_Os01g68860.1	zinc finger C-x8-C-x5-C-x3-H type family protein, expressed	AT3G02830.1	zinc finger protein 1
C.E	Pavir.Eb01334.1.p|PACid:30314306	Pavir.Eb01334.1	2.07879580533185	1.055748053	0.02305209	30314306	Pavir.Eb01334.1	LOC_Os07g44650.1	LYR motif containing protein, putative, expressed	AT3G12260.1	LYR family of Fe/S cluster biogenesis protein
C.E	Pavir.Eb03260.1.p|PACid:30309661	Pavir.Eb03260.1	3.55088327	1.828177935	0.0006835	30309661	Pavir.Eb03260.1	LOC_Os01g55950.1	acetamidase, putative, expressed	AT4G37560.1	Acetamidase/Formamidase family protein
C.E	Pavir.Eb03495.1.p|PACid:30313460	Pavir.Eb03495.1	2.19010685	1.131001255	0.01293889	30313460	Pavir.Eb03495.1	LOC_Os01g59110.1	indole-3-acetate beta-glucosyltransferase, putative, expressed	AT2G30140.1	UDP-Glycosyltransferase superfamily protein
C.E	Pavir.Eb03528.2.p|PACid:30313716	Pavir.Eb03528.2	3.38334834	1.758451721	0.02127962	30313716	Pavir.Eb03528.2	LOC_Os01g70520.1	Os1bglu5 - beta-glucosidase homologue, similar to G. max isohydroxyurate hydrolase, expressed	AT1G02850.2	beta glucosidase 11
C.E	Pavir.Eb03564.1.p|PACid:30313189	Pavir.Eb03564.1	3.18710794	1.672247879	0.01046311	30313189	Pavir.Eb03564.1	LOC_Os01g60650.1	non-green plastid inner envelope membrane protein, putative, expressed	AT2G38550.1	Transmembrane proteins 14C
C.E	Pavir.Eb03662.1.p|PACid:30310464	Pavir.Eb03662.1	5.0017297	2.322427095	0.00791595	30310464	Pavir.Eb03662.1	LOC_Os01g31690.1	oxygen-evolving enhancer protein 1, chloroplast precursor, putative, expressed	AT3G50820.1	photosystem II subunit O-2
C.E	Pavir.Eb03776.1.p|PACid:30311412	Pavir.Eb03776.1	3.08439686	1.624988405	0.0082101	30311412	Pavir.Eb03776.1	LOC_Os01g61230.1	dihydroflavonol-4-reductase, putative, expressed	AT5G58490.1	NAD(P)-binding Rossmann-fold superfamily protein
C.E	Pavir.Fa00648.1.p|PACid:30186795	Pavir.Fa00648.1	3.48481406	1.801081678	0.0145882	30186795	Pavir.Fa00648.1	LOC_Os08g37320.1	expressed protein	AT3G52300.1	ATP synthase D chain, mitochondrial
C.E	Pavir.Fa01615.1.p|PACid:30186765	Pavir.Fa01615.1	0.383124	-1.384116689	0.04276304	30186765	Pavir.Fa01615.1	LOC_Os08g31870.1	cell division cycle protein 48, putative, expressed	AT3G53230.1	ATPase, AAA-type, CDC48 protein
C.E	Pavir.Ga00250.1.p|PACid:30303807	Pavir.Ga00250.1	2.40415391	1.265529255	0.02239861	30303807	Pavir.Ga00250.1	LOC_Os03g07130.1	RING finger protein 13, putative, expressed	AT1G71980.1	Protease-associated (PA) RING/U-box zinc finger family protein
C.E	Pavir.Ga00285.1.p|PACid:30305177	Pavir.Ga00285.1	2.19794836	1.136157492	0.00042085	30305177	Pavir.Ga00285.1	LOC_Os04g55730.1	alpha-N-acetylglucosaminidase, putative, expressed	AT5G13690.1	alpha-N-acetylglucosaminidase family / NAGLU family
C.E	Pavir.Ga00286.1.p|PACid:30303791	Pavir.Ga00286.1	0.4793433	-1.060868825	0.00023346	30303791	Pavir.Ga00286.1	LOC_Os04g55720.1	D-3-phosphoglycerate dehydrogenase, chloroplast precursor, putative, expressed	AT3G19480.1	D-3-phosphoglycerate dehydrogenase
C.E	Pavir.Ga00409.1.p|PACid:30303502	Pavir.Ga00409.1	2.11108977	1.077987925	0.01668203	30303502	Pavir.Ga00409.1	LOC_Os04g53490.1	OsCHL Chloroplastic lipocalin, expressed	AT3G47860.1	chloroplastic lipocalin
C.E	Pavir.Gb00653.1.p|PACid:30224789	Pavir.Gb00653.1	2.15135144	1.105243217	0.01328569	30224789	Pavir.Gb00653.1	LOC_Os04g43650.1	L-allo-threonine aldolase, putative, expressed	AT1G08630.1	threonine aldolase 1
C.E	Pavir.Ha00164.1.p|PACid:30318160	Pavir.Ha00164.1	0.41255303	-1.277348529	0.01047525	30318160	Pavir.Ha00164.1	LOC_Os11g43360.1	tropinone reductase 2, putative, expressed	AT5G06060.1	NAD(P)-binding Rossmann-fold superfamily protein
C.E	Pavir.Ha01744.1.p|PACid:30318635	Pavir.Ha01744.1	0.49838941	-1.004654693	0.01578719	30318635	Pavir.Ha01744.1	LOC_Os11g06650.1	transcription elongation factor protein, putative, expressed	AT5G09850.1	Transcription elongation factor (TFIIS) family protein
C.E	Pavir.Hb01246.1.p|PACid:30265856	Pavir.Hb01246.1	2.81749783	1.494414497	0.00050191	30265856	Pavir.Hb01246.1	LOC_Os09g04790.1	PAP fibrillin family domain containing protein, expressed	AT4G22240.1	Plastid-lipid associated protein PAP / fibrillin family protein
C.E	Pavir.Hb01466.1.p|PACid:30264706	Pavir.Hb01466.1	2.01936327	1.013900462	0.03147234	30264706	Pavir.Hb01466.1	LOC_Os11g29190.2	40S ribosomal protein S5, putative, expressed	AT2G37270.1	ribosomal protein 5B
C.E	Pavir.Ia00007.1.p|PACid:30211640	Pavir.Ia00007.1	2.53699744	1.343122062	0.00040047	30211640	Pavir.Ia00007.1	LOC_Os03g62370.1	WD40-like Beta Propeller Repeat family protein, expressed	AT1G21680.1	DPP6 N-terminal domain-like protein
C.E	Pavir.Ia00431.1.p|PACid:30211473	Pavir.Ia00431.1	2.68097631	1.422758474	0.02139314	30211473	Pavir.Ia00431.1	LOC_Os03g56190.1	cytochrome c oxidase-related, putative, expressed	AT4G37830.1	cytochrome c oxidase-related
C.E	Pavir.Ia02273.1.p|PACid:30214274	Pavir.Ia02273.1	2.20640703	1.141698961	0.01359976
C.E	Pavir.Ia03286.1.p|PACid:30212283	Pavir.Ia03286.1	3.09418293	1.629558492	0.01504428	30212283	Pavir.Ia03286.1	LOC_Os03g25480.1	cytochrome P450, putative, expressed	AT2G46950.1	cytochrome P450, family 709, subfamily B, polypeptide 2
C.E	Pavir.Ia04265.1.p|PACid:30210260	Pavir.Ia04265.1	2.10902916	1.076579043	0.00057079	30210260	Pavir.Ia04265.1	LOC_Os03g06170.1	hsp20/alpha crystallin family protein, putative, expressed	AT5G04890.1	HSP20-like chaperones superfamily protein
C.E	Pavir.Ia04525.1.p|PACid:30210573	Pavir.Ia04525.1	2.03568907	1.025517224	0.0070045
C.E	Pavir.Ib00181.1.p|PACid:30239939	Pavir.Ib00181.1	2.51989504	1.333363642	0.03039522	30239939	Pavir.Ib00181.1	LOC_Os03g03770.1	expressed protein	AT2G02050.1	NADH-ubiquinone oxidoreductase B18 subunit, putative
C.E	Pavir.Ib00581.1.p|PACid:30240206	Pavir.Ib00581.1	2.72598166	1.446775855	0.04536047	30240206	Pavir.Ib00581.1	LOC_Os03g09210.1	NADH dehydrogenase 1 alpha subcomplex subunit 13, putative, expressed	AT2G33220.1	GRIM-19 protein
C.E	Pavir.Ib00790.1.p|PACid:30242842	Pavir.Ib00790.1	2.84580885	1.50883876	0.02651857
C.E	Pavir.Ib01010.1.p|PACid:30237806	Pavir.Ib01010.1	2.45963005	1.29844134	0.0170106	30237806	Pavir.Ib01010.1	LOC_Os03g13800.1	ribosomal protein L7Ae, putative, expressed	AT5G20160.1	Ribosomal protein L7Ae/L30e/S12e/Gadd45 family protein
C.E	Pavir.Ib02422.1.p|PACid:30240684	Pavir.Ib02422.1	3.26436609	1.706802863	0.02268402	30240684	Pavir.Ib02422.1	LOC_Os10g39740.1	glutathione S-transferase, putative, expressed	AT3G03190.1	glutathione S-transferase F11
C.E	Pavir.Ib03226.1.p|PACid:30237176	Pavir.Ib03226.1	2.84876886	1.510338569	0.00329935	30237176	Pavir.Ib03226.1	LOC_Os11g28104.1	TKL_IRAK_DUF26-lf.4 - DUF26 kinases have homology to DUF26 containing loci, expressed	AT1G70520.1	cysteine-rich RLK (RECEPTOR-like protein kinase) 2
C.E	Pavir.Ib03630.1.p|PACid:30236769	Pavir.Ib03630.1	2.17843751	1.123293731	0.01185913	30236769	Pavir.Ib03630.1	LOC_Os10g40720.1	expansin precursor, putative, expressed	AT1G65680.1	expansin B2
C.E	Pavir.Ib03647.1.p|PACid:30239473	Pavir.Ib03647.1	2.85367605	1.512821569	6.2209e-06	30239473	Pavir.Ib03647.1	LOC_Os10g35370.1	oxidoreductase, short chain dehydrogenase/reductase family domain containing family, expressed	AT5G54190.1	protochlorophyllide oxidoreductase A
C.E	Pavir.J00993.1.p|PACid:30306102	Pavir.J00993.1	2.30098544	1.202251855	0.00371139	30306102	Pavir.J00993.1	LOC_Os05g51440.1	hsp20/alpha crystallin family protein, putative, expressed	AT5G04890.1	HSP20-like chaperones superfamily protein
C.E	Pavir.J01285.1.p|PACid:30264004	Pavir.J01285.1	2.12109641	1.0848102	0.02416504	30264004	Pavir.J01285.1	LOC_Os03g58980.1	Cupin domain containing protein, expressed	AT1G18970.1	germin-like protein 4
C.E	Pavir.J01553.1.p|PACid:30217534	Pavir.J01553.1	0.4696701	-1.090280352	0.00154684	30217534	Pavir.J01553.1	LOC_Os03g53660.1	Myosin head domain containing protein, expressed	AT2G31900.1	myosin-like protein XIF
C.E	Pavir.J02607.1.p|PACid:30287891	Pavir.J02607.1	2.50217505	1.323182725	0.01980898	30287891	Pavir.J02607.1	LOC_Os02g53490.1	cation efflux family protein, putative, expressed	AT3G58060.1	Cation efflux family protein
C.E	Pavir.J03218.1.p|PACid:30208624	Pavir.J03218.1	2.89259174	1.532362718	0.00343718	30208624	Pavir.J03218.1	LOC_Os01g25484.2	ferredoxin--nitrite reductase, putative, expressed	AT2G15620.1	nitrite reductase 1
C.E	Pavir.J04653.1.p|PACid:30294807	Pavir.J04653.1	2.00145197	1.001046997	0.04371712	30294807	Pavir.J04653.1	LOC_Os05g32820.1	peptide-N4-asparagine amidase A, putative, expressed	AT5G05480.1	Peptide-N4-(N-acetyl-beta-glucosaminyl)asparagine amidase A protein
C.E	Pavir.J05284.1.p|PACid:30196159	Pavir.J05284.1	2.03478746	1.024878107	0.04834108	30196159	Pavir.J05284.1	LOC_Os06g50330.1	senescence-associated protein, putative, expressed	AT2G17840.1	Senescence/dehydration-associated protein-related
C.E	Pavir.J05287.1.p|PACid:30282215	Pavir.J05287.1	0.46449973	-1.106250334	0.00092106	30282215	Pavir.J05287.1	LOC_Os05g06280.2	ATKINESIN-13A/KINESIN-13A, putative, expressed	AT3G16630.1	P-loop containing nucleoside triphosphate hydrolases superfamily protein
C.E	Pavir.J05435.1.p|PACid:30283389	Pavir.J05435.1	2.09484701	1.066844886	0.01105627	30283389	Pavir.J05435.1	LOC_Os05g10210.1	HAD superfamily phosphatase, putative, expressed	AT4G25150.1	HAD superfamily, subfamily IIIB acid phosphatase
C.E	Pavir.J05803.1.p|PACid:30286531	Pavir.J05803.1	2.24022811	1.163645644	0.01678619	30286531	Pavir.J05803.1	LOC_Os03g63390.1	plastocyanin-like domain containing protein, putative, expressed	AT2G02850.1	plantacyanin
C.E	Pavir.J08073.1.p|PACid:30308630	Pavir.J08073.1	2.01841522	1.01322299	0.01517729	30308630	Pavir.J08073.1	LOC_Os03g14180.1	hsp20/alpha crystallin family protein, putative, expressed	AT4G27670.1	heat shock protein 21
C.E	Pavir.J09192.1.p|PACid:30198334	Pavir.J09192.1	2.23233062	1.158550714	0.01070305	30198334	Pavir.J09192.1	LOC_Os09g32550.2	glucan endo-1,3-beta-glucosidase precursor, putative, expressed	AT3G07320.1	O-Glycosyl hydrolases family 17 protein
C.E	Pavir.J11476.1.p|PACid:30275547	Pavir.J11476.1	0.48640518	-1.039769499	0.0014907	30275547	Pavir.J11476.1	LOC_Os05g49150.1	eukaryotic translation initiation factor 3 subunit D, putative, expressed	AT4G20980.1	Eukaryotic translation initiation factor 3 subunit 7 (eIF-3)
C.E	Pavir.J12186.1.p|PACid:30208393	Pavir.J12186.1	2.28656577	1.193182414	0.02530458	30208393	Pavir.J12186.1	LOC_Os04g57020.1	expressed protein	AT3G58010.1	plastoglobulin 34kD
C.E	Pavir.J12472.1.p|PACid:30295593	Pavir.J12472.1	0.45013331	-1.151575755	0.04742478	30295593	Pavir.J12472.1	LOC_Os11g01380.1	clathrin heavy chain, putative, expressed	AT3G11130.1	Clathrin, heavy chain
C.E	Pavir.J13435.1.p|PACid:30286175	Pavir.J13435.1	0.47942466	-1.060623991	0.04959403	30286175	Pavir.J13435.1	LOC_Os12g42980.1	cysteine synthase, putative, expressed	AT4G14880.1	O-acetylserine (thiol) lyase (OAS-TL) isoform A1
C.E	Pavir.J14112.1.p|PACid:30283920	Pavir.J14112.1	2.03243302	1.023207812	0.04479155	30283920	Pavir.J14112.1	LOC_Os05g01810.1	xylem cysteine proteinase 2 precursor, putative, expressed	AT1G20850.1	xylem cysteine peptidase 2
C.E	Pavir.J14669.1.p|PACid:30283747	Pavir.J14669.1	2.04293735	1.030644959	0.00219086	30283747	Pavir.J14669.1	LOC_Os03g16850.1	dof zinc finger domain containing protein, putative, expressed	AT5G02460.1	Dof-type zinc finger DNA-binding family protein
C.E	Pavir.J14758.1.p|PACid:30244007	Pavir.J14758.1	0.45210839	-1.145259391	0.00245607	30244007	Pavir.J14758.1	LOC_Os04g55720.1	D-3-phosphoglycerate dehydrogenase, chloroplast precursor, putative, expressed	AT4G34200.1	D-3-phosphoglycerate dehydrogenase
C.E	Pavir.J15812.1.p|PACid:30248492	Pavir.J15812.1	2.148098	1.10305981	0.00352473	30248492	Pavir.J15812.1	LOC_Os03g51240.1	glycosyl hydrolases family 17, putative, expressed	AT5G42720.1	Glycosyl hydrolase family 17 protein
C.E	Pavir.J17400.1.p|PACid:30256619	Pavir.J17400.1	2.1926094	1.13264883	0.00053756
C.E	Pavir.J17936.1.p|PACid:30295599	Pavir.J17936.1	2.39060453	1.257375487	0.00733231	30295599	Pavir.J17936.1	LOC_Os12g07820.1	OsAPx6 - Stromal Ascorbate Peroxidase encoding gene 5,8, expressed	AT4G08390.1	stromal ascorbate peroxidase
C.E	Pavir.J21724.1.p|PACid:30255555	Pavir.J21724.1	0.42835499	-1.22312119	0.01849227	30255555	Pavir.J21724.1	LOC_Os05g08480.1	cytokinin-O-glucosyltransferase 1, putative, expressed	AT3G53150.1	UDP-glucosyl transferase 73D1
C.E	Pavir.J27261.1.p|PACid:30217583	Pavir.J27261.1	2.88014843	1.526143165	0.02415302
C.E	Pavir.J27601.1.p|PACid:30246867	Pavir.J27601.1	3.33379633	1.737165971	0.0015696	30246867	Pavir.J27601.1	LOC_Os07g47510.1	stress-related protein, putative, expressed	AT3G05500.1	Rubber elongation factor protein (REF)
C.E	Pavir.J33491.1.p|PACid:30281327	Pavir.J33491.1	2.44067122	1.287277964	0.00405412	30281327	Pavir.J33491.1	LOC_Os01g06580.1	fasciclin domain containing protein, expressed	AT5G03170.1	FASCICLIN-like arabinogalactan-protein 11
C.E	Pavir.J35824.1.p|PACid:30258984	Pavir.J35824.1	2.01605208	1.01153291	0.00155754	30258984	Pavir.J35824.1	LOC_Os11g38260.1	PAP fibrillin family domain containing protein, expressed	AT3G23400.1	Plastid-lipid associated protein PAP / fibrillin family protein
C.E	Pavir.J37785.1.p|PACid:30247312	Pavir.J37785.1	3.906405	1.965841529	0.00426891	30247312	Pavir.J37785.1	LOC_Os07g03730.1	SCP-like extracellular protein, expressed	AT4G33720.1	CAP (Cysteine-rich secretory proteins, Antigen 5, and Pathogenesis-related 1 protein) superfamily protein
C.E	Pavir.J38590.1.p|PACid:30221277	Pavir.J38590.1	0.41694124	-1.262084008	0.04050638	30221277	Pavir.J38590.1	LOC_Os04g55960.1	NADPH reductase, putative, expressed	AT4G30210.2	P450 reductase 2
C.E	Pavir.J39622.1.p|PACid:30207856	Pavir.J39622.1	2.88038886	1.526263594	0.01090853	30207856	Pavir.J39622.1	LOC_Os05g40400.1	harpin-induced protein 1 domain containing protein, expressed	AT3G05975.1	Late embryogenesis abundant (LEA) hydroxyproline-rich glycoprotein family
C.E	Pavir.Aa00332.1.p|PACid:30252986	Pavir.Aa00332.1	3.21153328	1.683262246	0.00120667	30252986	Pavir.Aa00332.1	LOC_Os02g53320.1	universal stress protein domain containing protein, putative, expressed	AT3G03270.2	Adenine nucleotide alpha hydrolases-like superfamily protein
C.E	Pavir.Aa00552.1.p|PACid:30252815	Pavir.Aa00552.1	0.49009387	-1.028869997	0.00653868	30252815	Pavir.Aa00552.1	LOC_Os02g52390.1	M16 domain containing zinc peptidase, putative, expressed	AT3G19170.1	presequence protease 1
C.E	Pavir.Aa01476.1.p|PACid:30249309	Pavir.Aa01476.1	2.12440674	1.087060012	0.00087491	30249309	Pavir.Aa01476.1	LOC_Os02g37000.1	mitochondrial prohibitin complex protein 1, putative, expressed	AT5G40770.1	prohibitin 3
C.E	Pavir.Aa01512.1.p|PACid:30252328	Pavir.Aa01512.1	4.01111281	2.004002543	0.00129221	30252328	Pavir.Aa01512.1	LOC_Os02g35940.1	gibberellin receptor GID1L2, putative, expressed	AT1G47480.1	alpha/beta-Hydrolases superfamily protein
C.E	Pavir.Aa01645.1.p|PACid:30252357	Pavir.Aa01645.1	2.46882442	1.303824235	0.02937028	30252357	Pavir.Aa01645.1	LOC_Os02g35590.2	glutathione S-transferase, putative, expressed	AT2G02380.1	glutathione S-transferase (class zeta) 2
C.E	Pavir.Aa01736.1.p|PACid:30251876	Pavir.Aa01736.1	0.42131461	-1.247030152	0.00659422
C.E	Pavir.Aa02058.1.p|PACid:30253206	Pavir.Aa02058.1	2.17087724	1.118278147	0.01949385	30253206	Pavir.Aa02058.1	LOC_Os03g14400.1	cytochrome P450, putative, expressed	AT2G45550.1	cytochrome P450, family 76, subfamily C, polypeptide 4
C.E	Pavir.Aa03322.1.p|PACid:30251014	Pavir.Aa03322.1	0.33930075	-1.559363469	0.03339435	30251014	Pavir.Aa03322.1	LOC_Os02g07410.1	glycine cleavage system H protein, putative, expressed	AT2G35120.1	Single hybrid motif superfamily protein
C.E	Pavir.Ab00473.1.p|PACid:30236594	Pavir.Ab00473.1	0.4157824	-1.266099422	0.0260698	30236594	Pavir.Ab00473.1	LOC_Os02g07410.1	glycine cleavage system H protein, putative, expressed	AT2G35120.1	Single hybrid motif superfamily protein
C.E	Pavir.Ab00731.1.p|PACid:30236320	Pavir.Ab00731.1	2.61235526	1.385351105	0.00510866	30236320	Pavir.Ab00731.1	LOC_Os02g10710.1	hsp20/alpha crystallin family protein, putative, expressed	AT1G52560.1	HSP20-like chaperones superfamily protein
C.E	Pavir.Ab01476.1.p|PACid:30234312	Pavir.Ab01476.1	2.08698347	1.061419173	0.03628166	30234312	Pavir.Ab01476.1	LOC_Os03g14560.1	cytochrome P450, putative, expressed	AT2G45550.1	cytochrome P450, family 76, subfamily C, polypeptide 4
C.E	Pavir.Ab02053.1.p|PACid:30235451	Pavir.Ab02053.1	2.68616381	1.425547286	9.3461e-05	30235451	Pavir.Ab02053.1	LOC_Os02g35940.1	gibberellin receptor GID1L2, putative, expressed	AT1G47480.1	alpha/beta-Hydrolases superfamily protein
C.E	Pavir.Ab02274.1.p|PACid:30236541	Pavir.Ab02274.1	4.18344165	2.064690311	0.02412397	30236541	Pavir.Ab02274.1	LOC_Os02g39930.1	OsTIL-1 Temperature-induced lipocalin-1, expressed	AT5G58070.1	temperature-induced lipocalin
C.E	Pavir.Ab02318.1.p|PACid:30235492	Pavir.Ab02318.1	2.74148226	1.45495614	0.02158337	30235492	Pavir.Ab02318.1	LOC_Os02g40500.1	OsGrx_C2.1 - glutaredoxin subgroup I, expressed	AT5G40370.1	Glutaredoxin family protein
C.E	Pavir.Ab02893.1.p|PACid:30235608	Pavir.Ab02893.1	6.86843869	2.779982187	8.4975e-05
C.E	Pavir.Ba00222.1.p|PACid:30290494	Pavir.Ba00222.1	2.72500844	1.446260698	0.00250782	30290494	Pavir.Ba00222.1	LOC_Os07g48160.1	alpha-galactosidase precursor, putative, expressed	AT3G56310.1	Melibiase family protein
C.E	Pavir.Ba00258.1.p|PACid:30291621	Pavir.Ba00258.1	2.81343562	1.492332952	0.00146046	30291621	Pavir.Ba00258.1	LOC_Os03g20420.1	alpha-N-arabinofuranosidase A, putative, expressed	AT3G10740.1	alpha-L-arabinofuranosidase 1
C.E	Pavir.Ba01215.1.p|PACid:30290531	Pavir.Ba01215.1	3.97804173	1.99205841	0.00894306	30290531	Pavir.Ba01215.1	LOC_Os09g36700.1	ribonuclease T2 family domain containing protein, expressed	AT1G14220.1	Ribonuclease T2 family protein
C.E	Pavir.Ba03074.1.p|PACid:30292795	Pavir.Ba03074.1	3.06013529	1.613595437	0.00662925
C.E	Pavir.Ba03245.1.p|PACid:30289089	Pavir.Ba03245.1	0.40044975	-1.320306886	0.00294399	30289089	Pavir.Ba03245.1	LOC_Os10g09620.1	OsWAK108 - OsWAK receptor-like protein kinase, expressed	AT1G21240.1	wall associated kinase 3
C.E	Pavir.Ba03478.1.p|PACid:30291380	Pavir.Ba03478.1	2.18100619	1.124993864	0.01926841	30291380	Pavir.Ba03478.1	LOC_Os07g10500.1	cytochrome b-c1 complex subunit 7, putative, expressed	AT5G25450.1	Cytochrome bd ubiquinol oxidase, 14kDa subunit
C.E	Pavir.Ba03692.1.p|PACid:30293021	Pavir.Ba03692.1	2.28949558	1.195029778	0.00068538	30293021	Pavir.Ba03692.1	LOC_Os07g07450.1	versicolorin reductase, putative, expressed	AT3G03980.1	NAD(P)-binding Rossmann-fold superfamily protein
C.E	Pavir.Bb00105.1.p|PACid:30297002	Pavir.Bb00105.1	0.21991817	-2.18496131	0.00372772	30297002	Pavir.Bb00105.1	LOC_Os07g01410.1	peroxidase precursor, putative, expressed	AT3G01190.1	Peroxidase superfamily protein
C.E	Pavir.Bb00159.1.p|PACid:30301712	Pavir.Bb00159.1	0.34251277	-1.545770303	0.0084212	30301712	Pavir.Bb00159.1	LOC_Os01g70525.1	tropinone reductase, putative, expressed	AT5G06060.1	NAD(P)-binding Rossmann-fold superfamily protein
C.E	Pavir.Bb00247.1.p|PACid:30298381	Pavir.Bb00247.1	2.01933058	1.013877112	0.01902233	30298381	Pavir.Bb00247.1	LOC_Os07g04910.1	reticulon domain containing protein, putative, expressed	AT3G10260.3	Reticulon family protein
C.E	Pavir.Bb00665.1.p|PACid:30296629	Pavir.Bb00665.1	0.45151966	-1.1471393	0.01829507	30296629	Pavir.Bb00665.1	LOC_Os07g10150.1	coatomer subunit gamma-2, putative, expressed	AT4G34450.1	coatomer gamma-2 subunit, putative / gamma-2 coat protein, putative / gamma-2 COP, putative
C.E	Pavir.Bb00696.1.p|PACid:30297757	Pavir.Bb00696.1	0.4333359	-1.206442341	0.00206072	30297757	Pavir.Bb00696.1	LOC_Os12g09700.1	Jacalin-like lectin domain containing protein, putative, expressed	AT1G19715.3	Mannose-binding lectin superfamily protein
C.E	Pavir.Bb01257.1.p|PACid:30298750	Pavir.Bb01257.1	3.02771861	1.598231132	0.00877884
C.E	Pavir.Bb01503.1.p|PACid:30300143	Pavir.Bb01503.1	2.23892765	1.162807906	0.00171556	30300143	Pavir.Bb01503.1	LOC_Os11g24374.1	OsSCP55 - Putative Serine Carboxypeptidase homologue, expressed	AT2G22980.1	serine carboxypeptidase-like 13
C.E	Pavir.Bb01883.1.p|PACid:30296571	Pavir.Bb01883.1	2.264212	1.179009048	0.00888483	30296571	Pavir.Bb01883.1	LOC_Os09g23370.1	proline-rich protein 6, putative, expressed	AT5G16940.1	carbon-sulfur lyases
C.E	Pavir.Bb02409.1.p|PACid:30298298	Pavir.Bb02409.1	2.11059589	1.077650375	0.0001202	30298298	Pavir.Bb02409.1	LOC_Os09g30438.2	expressed protein	AT2G33690.1	Late embryogenesis abundant protein, group 6
C.E	Pavir.Bb02686.1.p|PACid:30297191	Pavir.Bb02686.1	0.46497312	-1.104780786	0.00971604	30297191	Pavir.Bb02686.1	LOC_Os08g43580.1	acyl carrier protein, putative, expressed	AT1G54580.1	acyl carrier protein 2
C.E	Pavir.Bb02933.1.p|PACid:30300552	Pavir.Bb02933.1	2.19438397	1.133815987	0.01597763	30300552	Pavir.Bb02933.1	LOC_Os07g35520.1	glucan endo-1,3-beta-glucosidase precursor, putative, expressed	AT5G55180.1	O-Glycosyl hydrolases family 17 protein
C.E	Pavir.Bb03197.1.p|PACid:30299608	Pavir.Bb03197.1	4.02782944	2.010002593	6.0674e-06	30299608	Pavir.Bb03197.1	LOC_Os03g46070.1	thaumatin, putative, expressed	AT4G11650.1	osmotin 34
C.E	Pavir.Bb03618.1.p|PACid:30300930	Pavir.Bb03618.1	2.38180079	1.252052753	0.00235345	30300930	Pavir.Bb03618.1	LOC_Os01g15320.1	RALFL9 - Rapid ALkalinization Factor RALF family protein precursor, expressed	AT4G15800.1	ralf-like 33
C.E	Pavir.Ca00243.1.p|PACid:30203089	Pavir.Ca00243.1	2.41381109	1.271312775	0.00030921	30203089	Pavir.Ca00243.1	LOC_Os12g07820.1	OsAPx6 - Stromal Ascorbate Peroxidase encoding gene 5,8, expressed	AT4G08390.1	stromal ascorbate peroxidase
C.E	Pavir.Ca00608.1.p|PACid:30204384	Pavir.Ca00608.1	3.14199889	1.651682669	0.00432413	30204384	Pavir.Ca00608.1	LOC_Os12g36210.1	inhibitor I family protein, putative, expressed	AT2G38870.1	Serine protease inhibitor, potato inhibitor I-type family protein
C.E	Pavir.Ca00609.1.p|PACid:30204579	Pavir.Ca00609.1	2.62103987	1.390139299	0.00022871	30204579	Pavir.Ca00609.1	LOC_Os12g25090.2	expressed protein	AT2G38870.1	Serine protease inhibitor, potato inhibitor I-type family protein
C.E	Pavir.Ca00811.1.p|PACid:30204135	Pavir.Ca00811.1	2.47667701	1.308405734	0.00133579	30204135	Pavir.Ca00811.1	LOC_Os05g10210.1	HAD superfamily phosphatase, putative, expressed	AT4G25150.1	HAD superfamily, subfamily IIIB acid phosphatase
C.E	Pavir.Ca01780.1.p|PACid:30206225	Pavir.Ca01780.1	7.29955834	2.867809177	0.00747862	30206225	Pavir.Ca01780.1	LOC_Os05g46480.1	late embryogenesis abundant protein, group 3, putative, expressed	AT3G15670.1	Late embryogenesis abundant protein (LEA) family protein
C.E	Pavir.Ca02660.1.p|PACid:30206509	Pavir.Ca02660.1	2.19098654	1.131580619	0.00492757	30206509	Pavir.Ca02660.1	LOC_Os12g36640.2	universal stress protein domain containing protein, putative, expressed	AT2G47710.1	Adenine nucleotide alpha hydrolases-like superfamily protein
C.E	Pavir.Cb00512.1.p|PACid:30268195	Pavir.Cb00512.1	2.53676625	1.342990588	0.03510541	30268195	Pavir.Cb00512.1	LOC_Os12g38150.1	osmotin, putative, expressed	AT2G28790.1	Pathogenesis-related thaumatin superfamily protein
C.E	Pavir.Cb00662.1.p|PACid:30269981	Pavir.Cb00662.1	4.11211016	2.039878915	0.00232818	30269981	Pavir.Cb00662.1	LOC_Os11g26790.1	dehydrin, putative, expressed	AT5G66400.1	Dehydrin family protein
C.E	Pavir.Cb00701.1.p|PACid:30268632	Pavir.Cb00701.1	0.34570218	-1.532398377	0.01836475	30268632	Pavir.Cb00701.1	LOC_Os12g25630.1	sulfite oxidase, putative, expressed	AT3G01910.1	sulfite oxidase
C.E	Pavir.Cb00901.1.p|PACid:30269979	Pavir.Cb00901.1	0.35189487	-1.50678361	0.04818706	30269979	Pavir.Cb00901.1	LOC_Os12g34890.1	acyl carrier protein, putative, expressed	AT4G25050.1	acyl carrier protein 4
C.E	Pavir.Cb01443.1.p|PACid:30269304	Pavir.Cb01443.1	2.68745233	1.426239162	0.00194322
C.E	Pavir.Da00087.1.p|PACid:30194507	Pavir.Da00087.1	2.8934889	1.532810108	0.01134044	30194507	Pavir.Da00087.1	LOC_Os06g46740.1	early nodulin 20 precursor, putative, expressed	AT3G20570.1	early nodulin-like protein 9
C.E	Pavir.Da00146.1.p|PACid:30192844	Pavir.Da00146.1	3.48862982	1.802660519	0.02499438	30192844	Pavir.Da00146.1	LOC_Os06g48020.1	peroxidase precursor, putative, expressed	AT4G30170.1	Peroxidase family protein
C.E	Pavir.Da00686.1.p|PACid:30194562	Pavir.Da00686.1	0.45465591	-1.137152976	0.00050973	30194562	Pavir.Da00686.1	LOC_Os06g39080.1	UDP-glucoronosyl and UDP-glucosyl transferase domain containing protein, expressed	AT2G15480.2	UDP-glucosyl transferase 73B5
C.E	Pavir.Da00810.1.p|PACid:30192346	Pavir.Da00810.1	2.36848728	1.243965924	0.00459234	30192346	Pavir.Da00810.1	LOC_Os06g35700.1	reticuline oxidase-like protein precursor, putative, expressed	AT4G20860.1	FAD-binding Berberine family protein
C.E	Pavir.Da01251.1.p|PACid:30191401	Pavir.Da01251.1	2.22712775	1.155184313	0.01464284	30191401	Pavir.Da01251.1	LOC_Os06g11310.1	plastocyanin-like domain containing protein, putative, expressed	AT2G15780.1	Cupredoxin superfamily protein
C.E	Pavir.Da01522.1.p|PACid:30193790	Pavir.Da01522.1	2.74422157	1.456396968	0.00295405	30193790	Pavir.Da01522.1	LOC_Os06g29470.1	peroxidase precursor, putative, expressed	AT1G05260.1	Peroxidase superfamily protein
C.E	Pavir.Da02439.1.p|PACid:30193736	Pavir.Da02439.1	2.03077916	1.022033361	0.00545475	30193736	Pavir.Da02439.1	LOC_Os06g01360.1	homogentisate 1,2-dioxygenase, putative, expressed	AT5G54080.1	homogentisate 1,2-dioxygenase
C.E	Pavir.Db00351.1.p|PACid:30262264	Pavir.Db00351.1	2.61999065	1.389561663	0.00020475	30262264	Pavir.Db00351.1	LOC_Os06g46900.1	phosphosulfolactate synthase-related protein, putative, expressed	AT4G21320.1	Aldolase-type TIM barrel family protein
C.E	Pavir.Db00371.1.p|PACid:30262621	Pavir.Db00371.1	2.05744162	1.040851491	0.00171817	30262621	Pavir.Db00371.1	LOC_Os06g46372.1	dehydrogenase, putative, expressed	AT4G20930.1	6-phosphogluconate dehydrogenase family protein
C.E	Pavir.Db01446.1.p|PACid:30262333	Pavir.Db01446.1	2.32409767	1.216670702	0.02014186	30262333	Pavir.Db01446.1	LOC_Os06g34040.1	DJ-1 family protein, putative, expressed	AT1G53280.1	Class I glutamine amidotransferase-like superfamily protein
C.E	Pavir.Db02130.1.p|PACid:30260942	Pavir.Db02130.1	2.34920072	1.232169982	0.00702967	30260942	Pavir.Db02130.1	LOC_Os06g06550.1	plant protein of unknown function domain containing protein, expressed	AT3G02645.1	Plant protein of unknown function (DUF247)
C.E	Pavir.Ea00295.1.p|PACid:30226575	Pavir.Ea00295.1	2.34395499	1.228944867	0.00228915	30226575	Pavir.Ea00295.1	LOC_Os06g14400.1	1-aminocyclopropane-1-carboxylate oxidase homolog 4, putative, expressed	AT1G03400.1	2-oxoglutarate (2OG) and Fe(II)-dependent oxygenase superfamily protein
C.E	Pavir.Ea00501.1.p|PACid:30230246	Pavir.Ea00501.1	3.74936928	1.906647926	0.00755916	30230246	Pavir.Ea00501.1	LOC_Os01g05650.1	metallothionein, putative, expressed	AT3G09390.1	metallothionein 2A
C.E	Pavir.Ea00606.1.p|PACid:30226304	Pavir.Ea00606.1	4.58718737	2.197609839	0.00414923	30226304	Pavir.Ea00606.1	LOC_Os01g04370.1	hsp20/alpha crystallin family protein, putative, expressed	AT5G59720.1	heat shock protein 18.2
C.E	Pavir.Ea01261.1.p|PACid:30231507	Pavir.Ea01261.1	2.07791145	1.055134176	0.02992371	30231507	Pavir.Ea01261.1	LOC_Os04g59260.1	peroxidase precursor, putative, expressed	AT1G71695.1	Peroxidase superfamily protein
C.E	Pavir.Ea01477.1.p|PACid:30231124	Pavir.Ea01477.1	2.96143344	1.566295659	0.0172762	30231124	Pavir.Ea01477.1	LOC_Os01g22336.1	peroxidase precursor, putative, expressed	AT3G21770.1	Peroxidase superfamily protein
C.E	Pavir.Ea01477.2.p|PACid:30231125	Pavir.Ea01477.2	3.55195946	1.828615115	0.00028246	30231125	Pavir.Ea01477.2	LOC_Os01g22352.1	peroxidase precursor, putative, expressed	AT1G44970.1	Peroxidase superfamily protein
C.E	Pavir.Ea01561.1.p|PACid:30227923	Pavir.Ea01561.1	2.58470579	1.37000007	0.00933117	30227923	Pavir.Ea01561.1	LOC_Os07g35680.1	TKL_IRAK_DUF26-lc22 - DUF26 kinases have homology to DUF26 containing loci, expressed	AT4G23180.1	cysteine-rich RLK (RECEPTOR-like protein kinase) 10
C.E	Pavir.Ea02497.1.p|PACid:30228113	Pavir.Ea02497.1	2.35500743	1.235731612	0.01705061	30228113	Pavir.Ea02497.1	LOC_Os01g49710.1	glutathione S-transferase, putative, expressed	AT1G10360.1	glutathione S-transferase TAU 18
C.E	Pavir.Ea02983.1.p|PACid:30228167	Pavir.Ea02983.1	3.59871894	1.847483432	0.00331375	30228167	Pavir.Ea02983.1	LOC_Os01g54030.1	NADP-dependent malic enzyme, putative, expressed	AT1G79750.1	NADP-malic enzyme 4
C.E	Pavir.Ea03384.1.p|PACid:30226667	Pavir.Ea03384.1	4.99019138	2.319095145	0.00483912
C.E	Pavir.Ea03391.1.p|PACid:30231527	Pavir.Ea03391.1	2.0181328	1.013021112	0.00124529	30231527	Pavir.Ea03391.1	LOC_Os01g62980.1	LTPL101 - Protease inhibitor/seed storage/LTP family protein precursor, expressed	AT5G05960.1	Bifunctional inhibitor/lipid-transfer protein/seed storage 2S albumin superfamily protein
C.E	Pavir.Eb00019.1.p|PACid:30314169	Pavir.Eb00019.1	3.47502432	1.797023073	0.0050551	30314169	Pavir.Eb00019.1	LOC_Os01g13210.1	salt stress root protein RS1, putative, expressed	AT4G20260.5	plasma-membrane associated cation-binding protein 1
C.E	Pavir.Eb00944.1.p|PACid:30309163	Pavir.Eb00944.1	2.69367611	1.429576392	0.00855296	30309163	Pavir.Eb00944.1	LOC_Os01g15320.1	RALFL9 - Rapid ALkalinization Factor RALF family protein precursor, expressed	AT4G15800.1	ralf-like 33
C.E	Pavir.Eb01124.1.p|PACid:30311582	Pavir.Eb01124.1	2.23141793	1.157960749	0.00257383	30311582	Pavir.Eb01124.1	LOC_Os01g16430.1	cysteine proteinase inhibitor precursor protein, putative, expressed	AT3G12490.2	cystatin B
C.E	Pavir.Eb03276.1.p|PACid:30312971	Pavir.Eb03276.1	2.15710918	1.109099197	0.00214663	30312971	Pavir.Eb03276.1	LOC_Os01g56150.1	OsProCP1 - Putative Lysosomal Pro-x Carboxypeptidase homologue, expressed	AT5G65760.1	Serine carboxypeptidase S28 family protein
C.E	Pavir.Eb03806.1.p|PACid:30312699	Pavir.Eb03806.1	6.65608706	2.734674305	0.04691623	30312699	Pavir.Eb03806.1	LOC_Os12g43490.1	thaumatin, putative, expressed	AT4G11650.1	osmotin 34
C.E	Pavir.Eb03845.1.p|PACid:30311172	Pavir.Eb03845.1	2.76310586	1.466290836	0.02613667	30311172	Pavir.Eb03845.1	LOC_Os01g70770.1	glutathione S-transferase, putative, expressed	AT3G62760.1	Glutathione S-transferase family protein
C.E	Pavir.Eb03999.1.p|PACid:30313144	Pavir.Eb03999.1	2.09806006	1.069055975	0.00749366	30313144	Pavir.Eb03999.1	LOC_Os01g73170.1	peroxidase precursor, putative, expressed	AT1G71695.1	Peroxidase superfamily protein
C.E	Pavir.Fa00854.1.p|PACid:30186975	Pavir.Fa00854.1	0.43296651	-1.207672654	0.04787007	30186975	Pavir.Fa00854.1	LOC_Os08g33370.1	14-3-3 protein, putative, expressed	AT3G02520.1	general regulatory factor 7
C.E	Pavir.Fa01008.1.p|PACid:30186143	Pavir.Fa01008.1	2.65863424	1.410685311	0.00260276	30186143	Pavir.Fa01008.1	LOC_Os08g02230.1	FAD-binding and arabino-lactone oxidase domains containing protein, putative, expressed	AT2G46750.1	D-arabinono-1,4-lactone oxidase family protein
C.E	Pavir.Fa01556.1.p|PACid:30187567	Pavir.Fa01556.1	3.54490254	1.825745963	0.02544725	30187567	Pavir.Fa01556.1	LOC_Os08g02230.1	FAD-binding and arabino-lactone oxidase domains containing protein, putative, expressed	AT1G32300.1	D-arabinono-1,4-lactone oxidase family protein
C.E	Pavir.Fa01601.1.p|PACid:30186390	Pavir.Fa01601.1	3.69488241	1.88552845	0.03082701	30186390	Pavir.Fa01601.1	LOC_Os08g02230.1	FAD-binding and arabino-lactone oxidase domains containing protein, putative, expressed	AT2G46760.1	D-arabinono-1,4-lactone oxidase family protein
C.E	Pavir.Fa01696.1.p|PACid:30187488	Pavir.Fa01696.1	0.46375748	-1.108557544	0.00815205	30187488	Pavir.Fa01696.1	LOC_Os08g16910.1	dehydrogenase, putative, expressed	AT4G39330.1	cinnamyl alcohol dehydrogenase 9
C.E	Pavir.Fa02123.1.p|PACid:30186363	Pavir.Fa02123.1	2.34799361	1.231428483	0.00233852	30186363	Pavir.Fa02123.1	LOC_Os08g09250.2	glyoxalase family protein, putative, expressed	AT1G11840.6	glyoxalase I homolog
C.E	Pavir.Fa02186.1.p|PACid:30187239	Pavir.Fa02186.1	2.38570744	1.254417137	0.0278303	30187239	Pavir.Fa02186.1	LOC_Os08g01950.1	transferase family protein, putative, expressed	AT5G67150.1	HXXXD-type acyl-transferase family protein
C.E	Pavir.Fa02193.1.p|PACid:30185674	Pavir.Fa02193.1	2.24058832	1.163877593	0.0061966	30185674	Pavir.Fa02193.1	LOC_Os07g38300.1	ribosome recycling factor, putative, expressed	AT3G63190.1	ribosome recycling factor, chloroplast precursor
C.E	Pavir.Fb00271.1.p|PACid:30281008	Pavir.Fb00271.1	2.05266656	1.037499291	0.03410703	30281008	Pavir.Fb00271.1	LOC_Os03g55010.1	UDP-glucoronosyl and UDP-glucosyl transferase domain containing protein, expressed	AT3G02100.1	UDP-Glycosyltransferase superfamily protein
C.E	Pavir.Fb00791.1.p|PACid:30280037	Pavir.Fb00791.1	4.76156298	2.251435215	0.00628814	30280037	Pavir.Fb00791.1	LOC_Os08g25734.1	glucose-1-phosphate adenylyltransferase large subunit, chloroplast precursor, putative, expressed	AT5G48300.1	ADP glucose pyrophosphorylase 1
C.E	Pavir.Fb02222.1.p|PACid:30279249	Pavir.Fb02222.1	3.7397524	1.902942755	9.48e-05	30279249	Pavir.Fb02222.1	LOC_Os08g44770.1	copper/zinc superoxide dismutase, putative, expressed	AT2G28190.1	copper/zinc superoxide dismutase 2
C.E	Pavir.Fb02310.1.p|PACid:30278297	Pavir.Fb02310.1	0.45743633	-1.128357131	0.01187615	30278297	Pavir.Fb02310.1	LOC_Os08g43580.1	acyl carrier protein, putative, expressed	AT1G54580.1	acyl carrier protein 2
C.E	Pavir.Ga00426.1.p|PACid:30304413	Pavir.Ga00426.1	0.48035404	-1.057829985	0.00904688	30304413	Pavir.Ga00426.1	LOC_Os04g53210.1	hydroxyacid oxidase 1, putative, expressed	AT4G18360.1	Aldolase-type TIM barrel family protein
C.E	Pavir.Ga00596.1.p|PACid:30302580	Pavir.Ga00596.1	6.70999903	2.746312558	0.00130717	30302580	Pavir.Ga00596.1	LOC_Os04g52110.1	late embryogenesis abundant protein, group 3, putative, expressed	AT5G44310.2	Late embryogenesis abundant protein (LEA) family protein
C.E	Pavir.Ga01599.1.p|PACid:30305090	Pavir.Ga01599.1	8.92542302	3.157920546	0.00081778
C.E	Pavir.Ga01718.1.p|PACid:30303744	Pavir.Ga01718.1	4.01734614	2.006242771	0.00102568	30303744	Pavir.Ga01718.1	LOC_Os04g36750.1	hsp20/alpha crystallin family protein, putative, expressed	AT4G10250.1	HSP20-like chaperones superfamily protein
C.E	Pavir.Ga01969.1.p|PACid:30303763	Pavir.Ga01969.1	0.44798214	-1.15848687	0.03639194	30303763	Pavir.Ga01969.1	LOC_Os04g31700.1	methylisocitrate lyase 2, putative, expressed	AT2G43180.2	Phosphoenolpyruvate carboxylase family protein
C.E	Pavir.Ga02727.1.p|PACid:30302629	Pavir.Ga02727.1	2.35740429	1.237199201	0.00280923	30302629	Pavir.Ga02727.1	LOC_Os04g15690.1	DSBA-like thioredoxin domain containing protein, expressed	AT1G20225.1	Thioredoxin superfamily protein
C.E	Pavir.Gb00543.1.p|PACid:30223554	Pavir.Gb00543.1	6.82819522	2.771504307	0.00743236	30223554	Pavir.Gb00543.1	LOC_Os04g52110.1	late embryogenesis abundant protein, group 3, putative, expressed	AT5G44310.2	Late embryogenesis abundant protein (LEA) family protein
C.E	Pavir.Gb01551.1.p|PACid:30224863	Pavir.Gb01551.1	2.66994588	1.416810498	3.7207e-05	30224863	Pavir.Gb01551.1	LOC_Os04g38390.1	wound/stress protein, putative, expressed	AT4G39730.1	Lipase/lipooxygenase, PLAT/LH2 family protein
C.E	Pavir.Gb01642.1.p|PACid:30222355	Pavir.Gb01642.1	2.33657442	1.224394985	0.00047997	30222355	Pavir.Gb01642.1	LOC_Os04g35520.1	OsAPx7 - Stromal Ascorbate Peroxidase encoding gene 5,8, expressed	AT4G08390.1	stromal ascorbate peroxidase
C.E	Pavir.Gb01988.1.p|PACid:30223710	Pavir.Gb01988.1	0.48257642	-1.051170675	0.02991827	30223710	Pavir.Gb01988.1	LOC_Os04g31700.1	methylisocitrate lyase 2, putative, expressed	AT2G43180.4	Phosphoenolpyruvate carboxylase family protein
C.E	Pavir.Gb02335.1.p|PACid:30223182	Pavir.Gb02335.1	2.32537997	1.217466473	0.03801609	30223182	Pavir.Gb02335.1	LOC_Os04g19740.1	transketolase, chloroplast precursor, putative, expressed	AT2G45290.1	Transketolase
C.E	Pavir.Hb00971.1.p|PACid:30264344	Pavir.Hb00971.1	4.0118391	2.004263748	0.00641591
C.E	Pavir.Hb01571.1.p|PACid:30264315	Pavir.Hb01571.1	4.62079604	2.208141409	0.01779668	30264315	Pavir.Hb01571.1	LOC_Os06g32550.1	THION14 - Plant thionin family protein precursor, putative, expressed	AT1G66100.1	Plant thionin
C.E	Pavir.Ia00088.1.p|PACid:30209179	Pavir.Ia00088.1	2.97932325	1.574984659	0.01262344	30209179	Pavir.Ia00088.1	LOC_Os03g63740.1	NFD2, putative, expressed	AT1G24450.1	Ribonuclease III family protein
C.E	Pavir.Ia00797.1.p|PACid:30210919	Pavir.Ia00797.1	3.38488552	1.759107042	0.01447718	30210919	Pavir.Ia00797.1	LOC_Os03g50160.1	plastocyanin-like domain containing protein, putative, expressed	AT2G02850.1	plantacyanin
C.E	Pavir.Ia01182.1.p|PACid:30215723	Pavir.Ia01182.1	3.17266844	1.665696758	0.00127835	30215723	Pavir.Ia01182.1	LOC_Os03g45340.1	hsp20/alpha crystallin family protein, putative, expressed	AT5G04890.1	HSP20-like chaperones superfamily protein
C.E	Pavir.Ia01894.1.p|PACid:30209168	Pavir.Ia01894.1	3.67536202	1.877886362	0.00042722	30209168	Pavir.Ia01894.1	LOC_Os10g30180.1	hsp20/alpha crystallin family protein, putative, expressed	AT5G20970.1	HSP20-like chaperones superfamily protein
C.E	Pavir.Ia01975.1.p|PACid:30210367	Pavir.Ia01975.1	2.26688332	1.180710137	0.0001972	30210367	Pavir.Ia01975.1	LOC_Os10g27280.1	thaumatin, putative, expressed	AT5G40020.1	Pathogenesis-related thaumatin superfamily protein
C.E	Pavir.Ia02658.1.p|PACid:30211741	Pavir.Ia02658.1	2.46593512	1.30213484	0.00058285
C.E	Pavir.Ia02723.1.p|PACid:30214198	Pavir.Ia02723.1	2.16513833	1.114459203	0.00253882	30214198	Pavir.Ia02723.1	LOC_Os10g18340.1	expressed protein	AT2G03440.1	nodulin-related protein 1
C.E	Pavir.Ia03162.1.p|PACid:30214069	Pavir.Ia03162.1	4.14384363	2.050969562	0.00043707
C.E	Pavir.Ia03444.1.p|PACid:30214087	Pavir.Ia03444.1	2.85599142	1.513991646	0.0002585	30214087	Pavir.Ia03444.1	LOC_Os03g21040.2	stress responsive protein, putative, expressed	AT2G39050.1	hydroxyproline-rich glycoprotein family protein
C.E	Pavir.Ia03444.2.p|PACid:30214088	Pavir.Ia03444.2	2.1884282	1.129895053	0.00016614	30214088	Pavir.Ia03444.2	LOC_Os03g21040.2	stress responsive protein, putative, expressed	AT2G39050.1	hydroxyproline-rich glycoprotein family protein
C.E	Pavir.Ia03678.1.p|PACid:30215378	Pavir.Ia03678.1	4.07477312	2.026719734	0.00043365	30215378	Pavir.Ia03678.1	LOC_Os03g20680.1	late embryogenesis abundant protein 1, putative, expressed	AT3G53040.1	late embryogenesis abundant protein, putative / LEA protein, putative
C.E	Pavir.Ia04404.1.p|PACid:30211920	Pavir.Ia04404.1	6.31054292	2.657764132	0.00028937	30211920	Pavir.Ia04404.1	LOC_Os03g04080.1	expressed protein	AT5G42290.1	transcription activator-related
C.E	Pavir.Ia04457.1.p|PACid:30209221	Pavir.Ia04457.1	2.1270543	1.088856864	0.00694537	30209221	Pavir.Ia04457.1	LOC_Os03g04060.1	CHIT16 - Chitinase family protein precursor, expressed	AT3G12500.1	basic chitinase
C.E	Pavir.Ib00203.1.p|PACid:30238910	Pavir.Ib00203.1	2.56804322	1.360669485	0.00458507	30238910	Pavir.Ib00203.1	LOC_Os03g04250.1	glutathione S-transferase, putative, expressed	AT2G47730.1	glutathione S-transferase phi 8
C.E	Pavir.Ib00352.1.p|PACid:30239823	Pavir.Ib00352.1	3.35459789	1.746139843	0.02302531	30239823	Pavir.Ib00352.1	LOC_Os03g04240.1	glutathione S-transferase, putative, expressed	AT2G47730.1	glutathione S-transferase phi 8
C.E	Pavir.Ib00428.1.p|PACid:30242435	Pavir.Ib00428	17.0995761	4.095888659	0.00252525
C.E	Pavir.Ib01026.1.p|PACid:30238031	Pavir.Ib01026.1	2.03444341	1.024634153	0.02368249	30238031	Pavir.Ib01026.1	LOC_Os03g14180.1	hsp20/alpha crystallin family protein, putative, expressed	AT4G27670.1	heat shock protein 21
C.E	Pavir.Ib01136.1.p|PACid:30237887	Pavir.Ib01136.1	2.35379778	1.234990382	0.00501719	30237887	Pavir.Ib01136.1	LOC_Os03g15960.1	hsp20/alpha crystallin family protein, putative, expressed	AT3G46230.1	heat shock protein 17.4
C.E	Pavir.Ib01540.1.p|PACid:30237822	Pavir.Ib01540.1	4.46173834	2.157605908	0.00382013	30237822	Pavir.Ib01540.1	LOC_Os03g21260.1	2,3-bisphosphoglycerate-independent phosphoglycerate mutase, putative, expressed	AT3G08590.1	Phosphoglycerate mutase, 2,3-bisphosphoglycerate-independent
C.E	Pavir.Ib01771.1.p|PACid:30241978	Pavir.Ib01771.1	2.85174683	1.511845911	0.03969845	30241978	Pavir.Ib01771.1	LOC_Os03g25480.1	cytochrome P450, putative, expressed	AT2G46950.1	cytochrome P450, family 709, subfamily B, polypeptide 2
C.E	Pavir.Ib02222.1.p|PACid:30238687	Pavir.Ib02222.1	2.78339218	1.476844196	0.00023263	30238687	Pavir.Ib02222.1	LOC_Os10g40720.1	expansin precursor, putative, expressed	AT1G65680.1	expansin B2
C.E	Pavir.Ib02543.1.p|PACid:30241255	Pavir.Ib02543.1	2.53559066	1.342321859	0.00391924	30241255	Pavir.Ib02543.1	LOC_Os10g38140.1	glutathione S-transferase, putative, expressed	AT1G10370.1	Glutathione S-transferase family protein
C.E	Pavir.Ib02577.1.p|PACid:30239592	Pavir.Ib02577.1	2.7920702	1.481335215	0.00401323	30239592	Pavir.Ib02577.1	LOC_Os06g31280.1	THION1 - Plant thionin family protein precursor, putative, expressed	AT1G66100.1	Plant thionin
C.E	Pavir.Ib02745.1.p|PACid:30240470	Pavir.Ib02745.1	2.47602363	1.308025081	0.00097711
C.E	Pavir.Ib03192.1.p|PACid:30238114	Pavir.Ib03192.1	2.08098054	1.057263473	0.00213292	30238114	Pavir.Ib03192.1	LOC_Os04g01590.1	arginase, putative, expressed	AT4G08900.1	arginase
C.E	Pavir.Ib03633.1.p|PACid:30239106	Pavir.Ib03633.1	5.36483457	2.423533686	0.04042596
C.E	Pavir.Ib03654.1.p|PACid:30243014	Pavir.Ib03654.1	2.61053788	1.384347091	0.00456686	30243014	Pavir.Ib03654.1	LOC_Os10g34920.1	secretory protein, putative, expressed	AT2G15220.1	Plant basic secretory protein (BSP) family protein
C.E	Pavir.Ib03659.1.p|PACid:30242017	Pavir.Ib03659.1	5.50243582	2.460070414	0.00096544	30242017	Pavir.Ib03659.1	LOC_Os10g35070.1	alpha-galactosidase precursor, putative, expressed	AT5G08380.1	alpha-galactosidase 1
C.E	Pavir.Ib03696.1.p|PACid:30241723	Pavir.Ib03696.1	2.23860649	1.162600946	7.2467e-05
C.E	Pavir.J00130.1.p|PACid:30200135	Pavir.J00130.1	4.11507217	2.040917734	0.01547358	30200135	Pavir.J00130.1	LOC_Os04g26910.1	oxidoreductase, aldo/keto reductase family protein, putative, expressed	AT1G60730.1	NAD(P)-linked oxidoreductase superfamily protein
C.E	Pavir.J00158.1.p|PACid:30282759	Pavir.J00158.1	9.2480346	3.209146796	0.02410139	30282759	Pavir.J00158.1	LOC_Os05g46480.1	late embryogenesis abundant protein, group 3, putative, expressed	AT3G15670.1	Late embryogenesis abundant protein (LEA) family protein
C.E	Pavir.J00683.1.p|PACid:30255035	Pavir.J00683.1	2.86124973	1.51664542	7.9355e-05	30255035	Pavir.J00683.1	LOC_Os01g62980.1	LTPL101 - Protease inhibitor/seed storage/LTP family protein precursor, expressed	AT5G05960.1	Bifunctional inhibitor/lipid-transfer protein/seed storage 2S albumin superfamily protein
C.E	Pavir.J00892.1.p|PACid:30275043	Pavir.J00892.1	3.65215964	1.868749827	0.00516775	30275043	Pavir.J00892.1	LOC_Os03g60580.1	actin-depolymerizing factor, putative, expressed	AT1G01750.1	actin depolymerizing factor 11
C.E	Pavir.J01051.1.p|PACid:30191168	Pavir.J01051.1	2.21165323	1.145125199	0.00078201	30191168	Pavir.J01051.1	LOC_Os09g33690.2	Os9bglu32 - beta-glucosidase homologue, similar to G. max hydroxyisourate hydrolase, expressed	AT1G02850.2	beta glucosidase 11
C.E	Pavir.J01160.1.p|PACid:30306248	Pavir.J01160.1	2.13631692	1.095125688	0.00413954	30306248	Pavir.J01160.1	LOC_Os03g58170.1	stem-specific protein TSJT1, putative, expressed	AT3G22850.1	Aluminium induced protein with YGL and LRDR motifs
C.E	Pavir.J01318.1.p|PACid:30285243	Pavir.J01318.1	0.38551135	-1.375154764	0.03805472					AT3G13920.1	eukaryotic translation initiation factor 4A1
C.E	Pavir.J01373.1.p|PACid:30219389	Pavir.J01373.1	0.3765156	-1.409218439	0.01055211	30219389	Pavir.J01373.1	LOC_Os08g43580.1	acyl carrier protein, putative, expressed	AT1G54580.1	acyl carrier protein 2
C.E	Pavir.J01632.1.p|PACid:30273203	Pavir.J01632.1	2.0320812	1.022958051	0.00175445	30273203	Pavir.J01632.1	LOC_Os05g35740.1	subtilisin N-terminal Region family protein, expressed	AT1G71950.1	Proteinase inhibitor, propeptide
C.E	Pavir.J02207.1.p|PACid:30225449	Pavir.J02207.1	0.23247365	-2.104860866	0.00026973	30225449	Pavir.J02207.1	LOC_Os05g33570.2	pyruvate, phosphate dikinase, chloroplast precursor, putative, expressed	AT4G15530.1	pyruvate orthophosphate dikinase
C.E	Pavir.J02312.1.p|PACid:30294775	Pavir.J02312.1	2.89614364	1.534133159	0.01073604	30294775	Pavir.J02312.1	LOC_Os05g39250.1	phosphatidylethanolamine-binding protein, putative, expressed	AT5G01300.1	PEBP (phosphatidylethanolamine-binding protein) family protein
C.E	Pavir.J04109.1.p|PACid:30256957	Pavir.J04109.1	0.38532194	-1.375863748	0.00410745	30256957	Pavir.J04109.1	LOC_Os08g43580.1	acyl carrier protein, putative, expressed	AT1G54580.1	acyl carrier protein 2
C.E	Pavir.J05150.1.p|PACid:30200200	Pavir.J05150.1	2.06493148	1.046093907	0.00066902	30200200	Pavir.J05150.1	LOC_Os08g44400.1	glutathione S-transferase, N-terminal domain containing protein, expressed	AT5G03880.1	Thioredoxin family protein
C.E	Pavir.J06494.1.p|PACid:30286195	Pavir.J06494.1	2.50395687	1.324209712	0.00656072	30286195	Pavir.J06494.1	LOC_Os03g41060.1	GASR2 - Gibberellin-regulated GASA/GAST/Snakin family protein precursor, putative, expressed	AT2G14900.1	Gibberellin-regulated family protein
C.E	Pavir.J06780.1.p|PACid:30220067	Pavir.J06780.1	0.11496086	-3.120785299	0.0097064	30220067	Pavir.J06780.1	LOC_Os01g67010.1	expressed protein	AT3G07570.1	Cytochrome b561/ferric reductase transmembrane with DOMON related domain
C.E	Pavir.J06934.1.p|PACid:30275192	Pavir.J06934.1	2.66704781	1.415243685	0.00174969	30275192	Pavir.J06934.1	LOC_Os07g28400.1	CDGSH iron sulfur domain-containing protein 1, putative, expressed	AT5G51720.1	2 iron, 2 sulfur cluster binding
C.E	Pavir.J07718.1.p|PACid:30257326	Pavir.J07718.1	0.33719727	-1.568335232	9.5528e-05	30257326	Pavir.J07718.1	LOC_Os10g37430.1	expressed protein	AT5G41950.1	Tetratricopeptide repeat (TPR)-like superfamily protein
C.E	Pavir.J07788.1.p|PACid:30273975	Pavir.J07788.1	0.46491935	-1.104947629	0.00271853	30273975	Pavir.J07788.1	LOC_Os09g26900.1	ctr copper transporter family protein, putative, expressed	AT5G20650.1	copper transporter 5
C.E	Pavir.J07818.1.p|PACid:30243543	Pavir.J07818.1	2.51814614	1.332362014	0.00114601	30243543	Pavir.J07818.1	LOC_Os04g36750.1	hsp20/alpha crystallin family protein, putative, expressed	AT4G10250.1	HSP20-like chaperones superfamily protein
C.E	Pavir.J08185.1.p|PACid:30185137	Pavir.J08185.1	3.29696375	1.721138027	0.0024162	30185137	Pavir.J08185.1	LOC_Os01g19770.1	mitochondrial import inner membrane translocase subunit Tim17, putative, expressed	AT4G16160.2	Mitochondrial import inner membrane translocase subunit Tim17/Tim22/Tim23 family protein
C.E	Pavir.J08895.1.p|PACid:30257540	Pavir.J08895.1	2.61495105	1.386783941	0.0007141	30257540	Pavir.J08895.1	LOC_Os12g12560.1	NADP-dependent oxidoreductase, putative, expressed	AT3G03080.1	Zinc-binding dehydrogenase family protein
C.E	Pavir.J09198.1.p|PACid:30218083	Pavir.J09198.1	3.14494213	1.65303347	0.02805347	30218083	Pavir.J09198.1	LOC_Os05g50380.1	glucose-1-phosphate adenylyltransferase large subunit, chloroplast precursor, putative, expressed	AT1G27680.1	ADPGLC-PPase large subunit
C.E	Pavir.J10133.1.p|PACid:30243454	Pavir.J10133.1	3.09168546	1.628393552	0.00294697	30243454	Pavir.J10133.1	LOC_Os09g12660.1	glucose-1-phosphate adenylyltransferase large subunit, chloroplast precursor, putative, expressed	AT5G48300.1	ADP glucose pyrophosphorylase 1
C.E	Pavir.J10323.1.p|PACid:30190884	Pavir.J10323.1	0.45185617	-1.146064467	0.01296616	30190884	Pavir.J10323.1	LOC_Os01g39860.1	1-aminocyclopropane-1-carboxylate oxidase protein, putative, expressed	AT2G19590.1	ACC oxidase 1
C.E	Pavir.J10693.1.p|PACid:30196042	Pavir.J10693.1	2.25685179	1.174311678	0.00285941
C.E	Pavir.J11885.1.p|PACid:30190130	Pavir.J11885.1	0.47445548	-1.075655383	0.01638778	30190130	Pavir.J11885.1	LOC_Os02g41860.4	aquaporin protein, putative, expressed	AT2G37170.1	plasma membrane intrinsic protein 2
C.E	Pavir.J12532.1.p|PACid:30245869	Pavir.J12532.1	2.34225874	1.227900453	0.00676405	30245869	Pavir.J12532.1	LOC_Os01g71060.1	xylanase inhibitor, putative, expressed	AT1G03220.1	Eukaryotic aspartyl protease family protein
C.E	Pavir.J13364.1.p|PACid:30256564	Pavir.J13364.1	6.57529718	2.7170561	0.00365815
C.E	Pavir.J15849.1.p|PACid:30199049	Pavir.J15849.1	0.29980994	-1.73787988	0.00080785	30199049	Pavir.J15849.1	LOC_Os05g33570.2	pyruvate, phosphate dikinase, chloroplast precursor, putative, expressed	AT4G15530.5	pyruvate orthophosphate dikinase
C.E	Pavir.J15860.1.p|PACid:30275456	Pavir.J15860.1	3.23681356	1.694574267	0.00431565	30275456	Pavir.J15860.1	LOC_Os05g39690.1	oxidoreductase, aldo/keto reductase family protein, putative, expressed	AT2G37770.2	NAD(P)-linked oxidoreductase superfamily protein
C.E	Pavir.J16347.1.p|PACid:30307684	Pavir.J16347.1	3.43103833	1.778645242	0.00077638	30307684	Pavir.J16347.1	LOC_Os03g60580.1	actin-depolymerizing factor, putative, expressed	AT1G01750.1	actin depolymerizing factor 11
C.E	Pavir.J16816.1.p|PACid:30301779	Pavir.J16816.1	0.49208637	-1.023016525	0.00212546	30301779	Pavir.J16816.1	LOC_Os05g49150.1	eukaryotic translation initiation factor 3 subunit D, putative, expressed	AT4G20980.1	Eukaryotic translation initiation factor 3 subunit 7 (eIF-3)
C.E	Pavir.J16984.1.p|PACid:30307708	Pavir.J16984.1	0.41446833	-1.270666213	0.03146107	30307708	Pavir.J16984.1	LOC_Os03g28400.1	transport protein particle component, Bet3, domain containing protein, expressed	AT5G54750.1	Transport protein particle (TRAPP) component
C.E	Pavir.J18194.1.p|PACid:30255395	Pavir.J18194.1	5.11966942	2.356050658	0.00511932	30255395	Pavir.J18194.1	LOC_Os02g33390.1	pectinesterase inhibitor domain containing protein, putative, expressed	AT5G46940.1	Plant invertase/pectin methylesterase inhibitor superfamily protein
C.E	Pavir.J19600.1.p|PACid:30274742	Pavir.J19600.1	2.10358741	1.072851769	0.03735923	30274742	Pavir.J19600.1	LOC_Os06g23350.1	late embryogenesis abundant protein D-34, putative, expressed	AT3G22490.1	Seed maturation protein
C.E	Pavir.J20172.1.p|PACid:30266975	Pavir.J20172.1	4.03007246	2.010805777	0.01296044	30266975	Pavir.J20172.1	LOC_Os09g29200.1	glutathione S-transferase, putative, expressed	AT3G09270.1	glutathione S-transferase TAU 8
C.E	Pavir.J20242.1.p|PACid:30185156	Pavir.J20242.1	2.36703232	1.243079405	0.0002412	30185156	Pavir.J20242.1	LOC_Os05g48330.1	aspartyl protease family protein, putative, expressed	AT3G12700.2	Eukaryotic aspartyl protease family protein
C.E	Pavir.J20981.1.p|PACid:30246326	Pavir.J20981.1	6.48890014	2.697973964	0.00070205
C.E	Pavir.J21027.1.p|PACid:30247869	Pavir.J21027.1	4.13032372	2.046254858	0.00218077
C.E	Pavir.J21349.1.p|PACid:30225604	Pavir.J21349.1	2.94114876	1.556379754	0.00092801	30225604	Pavir.J21349.1	LOC_Os02g54140.1	hsp20/alpha crystallin family protein, putative, expressed	AT1G54050.1	HSP20-like chaperones superfamily protein
C.E	Pavir.J22570.1.p|PACid:30308575	Pavir.J22570.1	2.43348516	1.283023974	0.00757466	30308575	Pavir.J22570.1	LOC_Os01g49720.1	glutathione S-transferase, putative, expressed	AT1G10360.1	glutathione S-transferase TAU 18
C.E	Pavir.J24821.1.p|PACid:30277014	Pavir.J24821.1	4.94386822	2.305640289	0.0064962	30277014	Pavir.J24821.1	LOC_Os01g50910.1	late embryogenesis abundant protein, group 3, putative, expressed	AT1G52690.1	Late embryogenesis abundant protein (LEA) family protein
C.E	Pavir.J25726.1.p|PACid:30194791	Pavir.J25726.1	3.68081132	1.8800238	0.01384988
C.E	Pavir.J25812.1.p|PACid:30220787	Pavir.J25812.1	2.45222837	1.294093342	0.00018268	30220787	Pavir.J25812.1	LOC_Os05g38230.2	oxidoreductase, aldo/keto reductase family protein, putative, expressed	AT2G37770.2	NAD(P)-linked oxidoreductase superfamily protein
C.E	Pavir.J27092.1.p|PACid:30208100	Pavir.J27092.1	2.80498859	1.487994903	8.4168e-05	30208100	Pavir.J27092.1	LOC_Os01g68770.1	selenium-binding protein, putative, expressed	AT4G14030.1	selenium-binding protein 1
C.E	Pavir.J28528.1.p|PACid:30277792	Pavir.J28528.1	6.88946261	2.784391454	0.00078882
C.E	Pavir.J28600.1.p|PACid:30202435	Pavir.J28600.1	8.25693648	3.045606606	0.0195314	30202435	Pavir.J28600.1	LOC_Os03g07180.1	embryonic protein DC-8, putative, expressed	AT4G36600.1	Late embryogenesis abundant (LEA) protein
C.E	Pavir.J30395.1.p|PACid:30283707	Pavir.J30395.1	2.30824609	1.206797041	0.00509312	30283707	Pavir.J30395.1	LOC_Os01g09430.1	expressed protein	AT3G21360.1	2-oxoglutarate (2OG) and Fe(II)-dependent oxygenase superfamily protein
C.E	Pavir.J31129.1.p|PACid:30225767	Pavir.J31129.1	2.07147629	1.050659304	0.00478362	30225767	Pavir.J31129.1	LOC_Os12g38120.1	thaumatin family domain containing protein, expressed	AT2G28790.1	Pathogenesis-related thaumatin superfamily protein
C.E	Pavir.J33969.1.p|PACid:30244750	Pavir.J33969.1	0.48360108	-1.048110643	0.03520264	30244750	Pavir.J33969.1	LOC_Os04g42580.1	carboxyvinyl-carboxyphosphonate phosphorylmutase, putative, expressed	AT2G43180.1	Phosphoenolpyruvate carboxylase family protein
C.E	Pavir.J34564.1.p|PACid:30263851	Pavir.J34564.1	3.20809616	1.681717388	0.00374026	30263851	Pavir.J34564.1	LOC_Os04g09390.1	HEV3 - Hevein family protein precursor, expressed	AT3G12500.1	basic chitinase
C.E	Pavir.J34655.1.p|PACid:30270543	Pavir.J34655.1	3.07062209	1.618530965	0.00578528	30270543	Pavir.J34655.1	LOC_Os01g62870.1	oxidoreductase, aldo/keto reductase family protein, putative, expressed	AT2G37770.2	NAD(P)-linked oxidoreductase superfamily protein
C.E	Pavir.J36067.1.p|PACid:30201011	Pavir.J36067.1	3.24330079	1.697462827	0.00667823	30201011	Pavir.J36067.1	LOC_Os01g08860.1	hsp20/alpha crystallin family protein, putative, expressed	AT5G12020.1	17.6 kDa class II heat shock protein
C.E	Pavir.J36772.1.p|PACid:30203019	Pavir.J36772.1	14.4638111	3.854375834	0.00711919	30203019	Pavir.J36772.1	LOC_Os04g09390.1	HEV3 - Hevein family protein precursor, expressed	AT3G04720.1	pathogenesis-related 4
C.E	Pavir.J37362.1.p|PACid:30294839	Pavir.J37362.1	2.05472285	1.038943812	0.01326307	30294839	Pavir.J37362.1	LOC_Os05g44340.1	heat shock protein 101, putative, expressed	AT1G74310.1	heat shock protein 101
C.E	Pavir.J38164.1.p|PACid:30306766	Pavir.J38164.1	0.48528651	-1.043091328	0.02219055	30306766	Pavir.J38164.1	LOC_Os03g17350.1	white-brown complex homolog protein, putative, expressed	AT3G55090.1	ABC-2 type transporter family protein
C.E	Pavir.J38252.1.p|PACid:30191144	Pavir.J38252.1	2.57595031	1.365104764	0.00332313	30191144	Pavir.J38252.1	LOC_Os01g58194.1	protein disulfide isomerase, putative, expressed	AT1G60420.1	DC1 domain-containing protein
C.E	Pavir.J40019.1.p|PACid:30256088	Pavir.J40019.1	0.39396447	-1.343862587	0.00245736	30256088	Pavir.J40019.1	LOC_Os07g38730.1	tubulin/FtsZ domain containing protein, putative, expressed	AT5G19780.1	tubulin alpha-5
C.RT	Pavir.Aa00530.1.p|PACid:30253346	Pavir.Aa00530.1	0.49136192	-1.025142041	0.024995	30253346	Pavir.Aa00530.1	LOC_Os02g52140.2	RNA recognition motif containing protein, putative, expressed	AT5G65260.1	RNA-binding (RRM/RBD/RNP motifs) family protein
C.RT	Pavir.Aa00537.1.p|PACid:30251268	Pavir.Aa00537.1	1.952006134	0.964957586	0.008714	30251268	Pavir.Aa00537.1	LOC_Os02g52180.1	plastocyanin-like domain containing protein, putative, expressed	AT2G32300.1	uclacyanin 1
C.RT	Pavir.Aa00599.1.p|PACid:30249169	Pavir.Aa00599.1	2.755544923	1.462337647	0.000379	30249169	Pavir.Aa00599.1	LOC_Os01g25484.2	ferredoxin--nitrite reductase, putative, expressed	AT2G15620.1	nitrite reductase 1
C.RT	Pavir.Aa00693.1.p|PACid:30253496	Pavir.Aa00693.1	0.48402456	-1.04684784	0.01631
C.RT	Pavir.Aa00887.1.p|PACid:30253439	Pavir.Aa00887.1	0.468803929	-1.092943435	0.010591	30253439	Pavir.Aa00887.1	LOC_Os02g44870.1	dehydrin, putative, expressed	AT1G20450.1	Dehydrin family protein
C.RT	Pavir.Aa00948.1.p|PACid:30251814	Pavir.Aa00948.1	1.95570109	0.967685885	0.006623	30251814	Pavir.Aa00948.1	LOC_Os02g45890.1	sulfotransferase domain containing protein, expressed	AT3G45070.1	P-loop containing nucleoside triphosphate hydrolases superfamily protein
C.RT	Pavir.Aa01145.1.p|PACid:30253740	Pavir.Aa01145.1	2.456258845	1.296462603	0.006176	30253740	Pavir.Aa01145.1	LOC_Os02g41904.1	DEF7 - Defensin and Defensin-like DEFL family, expressed	AT2G02100.1	low-molecular-weight cysteine-rich 69
C.RT	Pavir.Aa01787.1.p|PACid:30250395	Pavir.Aa01787.1	0.456398646	-1.131633583	0.015838	30250395	Pavir.Aa01787.1	LOC_Os02g34940.2	OsPDIL1-3 protein disulfide isomerase PDIL1-3, expressed	AT1G77510.1	PDI-like 1-2
C.RT	Pavir.Aa02013.1.p|PACid:30250381	Pavir.Aa02013.1	0.497283241	-1.007860282	0.009121	30250381	Pavir.Aa02013.1	LOC_Os08g40230.1	expressed protein	AT3G18240.1	Ribosomal protein S24/S35, mitochondrial
C.RT	Pavir.Aa02344.1.p|PACid:30250776	Pavir.Aa02344.1	0.438533872	-1.189239815	0.009564	30250776	Pavir.Aa02344.1	LOC_Os02g28980.1	peptidyl-prolyl isomerase, putative, expressed	AT3G25230.2	rotamase FKBP 1
C.RT	Pavir.Aa02863.1.p|PACid:30248966	Pavir.Aa02863.1	0.462391285	-1.112813889	0.012893
C.RT	Pavir.Aa03533.1.p|PACid:30251116	Pavir.Aa03533.1	0.487605282	-1.036214342	0.002304	30251116	Pavir.Aa03533.1	LOC_Os02g01010.1	OsPDIL1-4 protein disulfide isomerase PDIL1-4, expressed	AT5G60640.1	PDI-like 1-4
C.RT	Pavir.Ab00019.1.p|PACid:30233655	Pavir.Ab00019.1	0.4739685	-1.077136914	0.004797	30233655	Pavir.Ab00019.1	LOC_Os02g01010.1	OsPDIL1-4 protein disulfide isomerase PDIL1-4, expressed	AT3G54960.1	PDI-like 1-3
C.RT	Pavir.Ab00438.1.p|PACid:30236096	Pavir.Ab00438.1	0.456279609	-1.132009914	0.008545	30236096	Pavir.Ab00438.1	LOC_Os02g06584.2	zinc finger C-x8-C-x5-C-x3-H type family protein, expressed	AT3G21810.1	Zinc finger C-x8-C-x5-C-x3-H type family protein
C.RT	Pavir.Ab00778.1.p|PACid:30233092	Pavir.Ab00778.1	2.932481957	1.552122232	0.004598	30233092	Pavir.Ab00778.1	LOC_Os02g12610.1	hsp20/alpha crystallin family protein, putative, expressed	AT5G12030.1	heat shock protein 17.6A
C.RT	Pavir.Ab00804.1.p|PACid:30234181	Pavir.Ab00804.1	0.413245265	-1.274929805	0.002636	30234181	Pavir.Ab00804.1	LOC_Os02g12880.4	calcium-binding EF hand family protein, putative, expressed	AT5G08580.1	Calcium-binding EF hand family protein
C.RT	Pavir.Ab00874.1.p|PACid:30233474	Pavir.Ab00874.1	0.389860609	-1.358969702	0.025385	30233474	Pavir.Ab00874.1	LOC_Os02g11750.1	RNA recognition motif containing protein, putative, expressed	AT5G19960.1	RNA-binding (RRM/RBD/RNP motifs) family protein
C.RT	Pavir.Ab01247.1.p|PACid:30236234	Pavir.Ab01247.1	1.998454091	0.998884431	0.003368	30236234	Pavir.Ab01247.1	LOC_Os05g42060.1	UDP-glucoronosyl/UDP-glucosyl transferase, putative, expressed	AT2G15480.2	UDP-glucosyl transferase 73B5
C.RT	Pavir.Ab01885.1.p|PACid:30232816	Pavir.Ab01885.1	0.33582331	-1.57422572	0.007863
C.RT	Pavir.Ab02469.1.p|PACid:30236407	Pavir.Ab02469.1	0.442942927	-1.174807275	0.025876	30236407	Pavir.Ab02469.1	LOC_Os02g43760.1	ubiquitin carboxyl-terminal hydrolase, family 1, putative, expressed	AT4G17510.1	ubiquitin C-terminal hydrolase 3
C.RT	Pavir.Ab02798.1.p|PACid:30235984	Pavir.Ab02798.1	0.446302368	-1.163906632	0.017799	30235984	Pavir.Ab02798.1	LOC_Os02g46962.1	VHS and GAT domain containing protein, expressed	AT5G16880.1	Target of Myb protein 1
C.RT	Pavir.Ab03028.1.p|PACid:30235796	Pavir.Ab03028.1	0.291068115	-1.780571287	0.024043
C.RT	Pavir.Ba00296.1.p|PACid:30293679	Pavir.Ba00296.1.	0.198130084	-2.335480137	0.030749
C.RT	Pavir.Ba00424.1.p|PACid:30292203	Pavir.Ba00424.1	0.294783504	-1.762272301	0.021934	30292203	Pavir.Ba00424.1	LOC_Os07g42300.1	elongation factor protein, putative, expressed	AT1G30230.1	Glutathione S-transferase, C-terminal-like;Translation elongation factor EF1B/ribosomal protein S6
C.RT	Pavir.Ba00678.1.p|PACid:30291802	Pavir.Ba00678.1	0.512306734	-0.96492024	0.004235	30291802	Pavir.Ba00678.1	LOC_Os07g37040.1	PB1 domain containing protein, expressed	AT4G05150.1	Octicosapeptide/Phox/Bem1p family protein
C.RT	Pavir.Ba00833.1.p|PACid:30291174	Pavir.Ba00833.1	0.497843202	-1.006236664	0.010177	30291174	Pavir.Ba00833.1	ChrUn.fgenesh.mRNA.76	expressed protein	AT1G07350.1	RNA-binding (RRM/RBD/RNP motifs) family protein
C.RT	Pavir.Ba01203.1.p|PACid:30290195	Pavir.Ba01203.1	0.515445936	-0.956106979	0.014168	30290195	Pavir.Ba01203.1	LOC_Os09g36830.1	Skp1 family, dimerisation domain containing protein, expressed	AT5G42190.1	E3 ubiquitin ligase SCF complex subunit SKP1/ASK1 family protein
C.RT	Pavir.Ba01638.1.p|PACid:30292403	Pavir.Ba01638.1	0.450919405	-1.1490585	0.046439	30292403	Pavir.Ba01638.1	LOC_Os07g48500.1	stress responsive protein, putative, expressed	AT2G39050.1	hydroxyproline-rich glycoprotein family protein
C.RT	Pavir.Ba02588.1.p|PACid:30292191	Pavir.Ba02588.1	0.453863462	-1.139669745	0.002104	30292191	Pavir.Ba02588.1	LOC_Os09g02284.1	DNA-directed RNA polymerase subunit, putative, expressed	AT2G15430.1	DNA-directed RNA polymerase family protein
C.RT	Pavir.Ba02604.1.p|PACid:30291937	Pavir.Ba02604.1	0.472336263	-1.082113795	0.015198	30291937	Pavir.Ba02604.1	LOC_Os09g39180.1	RNA recognition motif containing protein, putative, expressed	AT4G24770.1	31-kDa RNA binding protein
C.RT	Pavir.Ba03900.1.p|PACid:30293452	Pavir.Ba03900.1	0.48899121	-1.032119562	0.006467	30293452	Pavir.Ba03900.1	LOC_Os07g04550.1	pleckstrin homology domain-containing protein, putative, expressed	AT2G30880.1	Pleckstrin homology (PH) domain-containing protein
C.RT	Pavir.Bb01434.1.p|PACid:30296876	Pavir.Bb01434.1	0.484426805	-1.0456494	0.025776	30296876	Pavir.Bb01434.1	LOC_Os01g72200.1	expressed protein	AT1G34570.1	Essential protein Yae1, N-terminal
C.RT	Pavir.Bb02408.1.p|PACid:30296941	Pavir.Bb02408.1	0.438886973	-1.188078645	0.013694	30296941	Pavir.Bb02408.1	LOC_Os08g39140.1	heat shock protein, putative, expressed	AT5G56030.1	heat shock protein 81-2
C.RT	Pavir.Bb02689.1.p|PACid:30300400	Pavir.Bb02689.1	0.466723385	-1.099360341	0.010402	30300400	Pavir.Bb02689.1	LOC_Os09g36900.1	WD domain, G-beta repeat domain containing protein, expressed	AT4G35050.1	Transducin family protein / WD-40 repeat family protein
C.RT	Pavir.Bb03322.1.p|PACid:30300232	Pavir.Bb03322.1	0.308237393	-1.697886205	0.018511	30300232	Pavir.Bb03322.1	LOC_Os07g42300.1	elongation factor protein, putative, expressed	AT1G30230.1	Glutathione S-transferase, C-terminal-like;Translation elongation factor EF1B/ribosomal protein S6
C.RT	Pavir.Bb03566.1.p|PACid:30296699	Pavir.Bb03566.1	0.467794217	-1.096054067	0.011436	30296699	Pavir.Bb03566.1	LOC_Os07g46440.1	ribosomal protein, putative, expressed	AT3G49080.1	Ribosomal protein S5 domain 2-like superfamily protein
C.RT	Pavir.Bb03568.1.p|PACid:30297891	Pavir.Bb03568.1	1.949483007	0.96309158	0.049615	30297891	Pavir.Bb03568.1	LOC_Os03g08020.1	elongation factor Tu, putative, expressed	AT1G07930.1	GTP binding Elongation factor Tu family protein
C.RT	Pavir.Bb03594.1.p|PACid:30299157	Pavir.Bb03594.1	0.394373143	-1.342366787	0.003595	30299157	Pavir.Bb03594.1	LOC_Os07g46750.1	elongation factor protein, putative, expressed	AT5G19510.1	Translation elongation factor EF1B/ribosomal protein S6 family protein
C.RT	Pavir.Ca00095.1.p|PACid:30204910	Pavir.Ca00095.1	0.458929814	-1.12365456	0.002242	30204910	Pavir.Ca00095.1	LOC_Os12g03822.1	WD domain, G-beta repeat domain containing protein, expressed	AT2G19540.1	Transducin family protein / WD-40 repeat family protein
C.RT	Pavir.Ca00896.1.p|PACid:30206505	Pavir.Ca00896.1	0.44006551	-1.184209791	0.015287	30206505	Pavir.Ca00896.1	LOC_Os05g48410.1	50S ribosomal protein L21, chloroplast precursor, putative, expressed	AT4G30930.1	Ribosomal protein L21
C.RT	Pavir.Ca00908.1.p|PACid:30204589	Pavir.Ca00908.1	0.382350627	-1.387031856	0.002727	30204589	Pavir.Ca00908.1	LOC_Os05g48620.1	tRNA-binding arm, putative, expressed	AT1G79830.1	golgin candidate 5
C.RT	Pavir.Ca01039.1.p|PACid:30205787	Pavir.Ca01039.1	0.37821669	-1.402715066	0.038107
C.RT	Pavir.Ca01232.1.p|PACid:30206742	Pavir.Ca01232.1	0.408803233	-1.290521489	0.001644	30206742	Pavir.Ca01232.1	LOC_Os05g04850.1	RNA recognition motif containing protein, putative, expressed	AT1G51510.1	RNA-binding (RRM/RBD/RNP motifs) family protein
C.RT	Pavir.Ca02271.1.p|PACid:30204886	Pavir.Ca02271.1	0.499981465	-1.000053482	0.027866
C.RT	Pavir.Ca02694.1.p|PACid:30203446	Pavir.Ca02694.1	0.461420823	-1.115844983	0.002362	30203446	Pavir.Ca02694.1	LOC_Os12g40090.1	B3 DNA binding domain containing protein, expressed	AT4G33280.1	AP2/B3-like transcriptional factor family protein
C.RT	Pavir.Cb00329.1.p|PACid:30269331	Pavir.Cb00329.1	0.429217228	-1.220220109	0.000222	30269331	Pavir.Cb00329.1	LOC_Os03g28990.1	zinc finger family protein, putative, expressed	AT5G60710.1	Zinc finger (C3HC4-type RING finger) family protein
C.RT	Pavir.Da00216.1.p|PACid:30192569	Pavir.Da00216.1	1.968189977	0.976869482	0.000406	30192569	Pavir.Da00216.1	LOC_Os02g08330.1	gp176, putative, expressed	AT5G43400.1	Uncharacterised conserved protein UCP015417, vWA
C.RT	Pavir.Db00212.1.p|PACid:30260997	Pavir.Db00212.1	0.349627924	-1.516107682	0.012718
C.RT	Pavir.Db00956.1.p|PACid:30262236	Pavir.Db00956.1	0.49370779	-1.018270687	0.015943
C.RT	Pavir.Db02432.1.p|PACid:30260051	Pavir.Db02432.1	0.382987716	-1.384629974	0.001783
C.RT	Pavir.Ea00508.1.p|PACid:30230543	Pavir.Ea00508.1	0.48118262	-1.05534356	0.013994	30230543	Pavir.Ea00508.1	LOC_Os01g05420.1	IWS1 C-terminus family protein, putative, expressed	AT1G32130.1	Transcription elongation factor (TFIIS) family protein
C.RT	Pavir.Ea00612.1.p|PACid:30230292	Pavir.Ea00612.1	0.412360804	-1.278020887	0.007518	30230292	Pavir.Ea00612.1	LOC_Os01g04330.1	OsCML16 - Calmodulin-related calcium sensor protein, expressed	AT5G37770.1	EF hand calcium-binding protein family
C.RT	Pavir.Ea01336.1.p|PACid:30230213	Pavir.Ea01336.1	2.092746077	1.065397273	0.016342	30230213	Pavir.Ea01336.1	LOC_Os01g25560.1	RALFL7 - Rapid ALkalinization Factor RALF family protein precursor, expressed	AT4G15800.1	ralf-like 33
C.RT	Pavir.Ea01530.1.p|PACid:30226243	Pavir.Ea01530.1	0.511075723	-0.968391032	0.00822	30226243	Pavir.Ea01530.1	LOC_Os01g33160.1	stress responsive A/B Barrel domain containing protein, expressed	AT3G17210.1	heat stable protein 1
C.RT	Pavir.Ea02474.1.p|PACid:30226284	Pavir.Ea02474.1	0.445679171	-1.165922557	0.016898	30226284	Pavir.Ea02474.1	LOC_Os01g49250.1	methyltransferase, putative, expressed	AT1G66680.1	S-adenosyl-L-methionine-dependent methyltransferases superfamily protein
C.RT	Pavir.Ea03820.1.p|PACid:30231290	Pavir.Ea03820.1	0.494249619	-1.016688241	0.0189	30231290	Pavir.Ea03820.1	LOC_Os01g70020.1	DEK C terminal domain containing protein, expressed	AT3G48710.1	DEK domain-containing chromatin associated protein
C.RT	Pavir.Eb00061.1.p|PACid:30309691	Pavir.Eb00061.1	1.96537046	0.974801277	0.003639	30309691	Pavir.Eb00061.1	LOC_Os01g13690.2	ligA, putative, expressed	AT5G57850.1	D-aminoacid aminotransferase-like PLP-dependent enzymes superfamily protein
C.RT	Pavir.Eb00723.1.p|PACid:30311233	Pavir.Eb00723.1	0.436515269	-1.195895976	0.03558	30311233	Pavir.Eb00723.1	LOC_Os01g05010.1	mitochondrial glycoprotein, putative, expressed	AT5G05990.1	Mitochondrial glycoprotein family protein
C.RT	Pavir.Eb00738.1.p|PACid:30313756	Pavir.Eb00738.1	3.311696149	1.72757031	0.001044	30313756	Pavir.Eb00738.1	LOC_Os01g05650.1	metallothionein, putative, expressed	AT3G09390.1	metallothionein 2A
C.RT	Pavir.Eb00806.1.p|PACid:30309749	Pavir.Eb00806.1	0.510241561	-0.970747679	0.035934	30309749	Pavir.Eb00806.1	LOC_Os01g01369.1	3-beta-hydroxysteroid-Delta-isomerase, putative, expressed	AT1G20050.1	C-8,7 sterol isomerase
C.RT	Pavir.Eb03229.1.p|PACid:30309405	Pavir.Eb03229.1	0.501541041	-0.995560334	0.013674	30309405	Pavir.Eb03229.1	LOC_Os01g55490.3	transcriptional regulator family protein, putative, expressed	AT1G29220.1	transcriptional regulator family protein
C.RT	Pavir.Eb03869.1.p|PACid:30309432	Pavir.Eb03869.1	2.265113738	1.179583494	0.039573	30309432	Pavir.Eb03869.1	LOC_Os01g71340.1	glycosyl hydrolases family 17, putative, expressed	AT3G57240.1	beta-1,3-glucanase 3
C.RT	Pavir.Eb03924.1.p|PACid:30311132	Pavir.Eb03924.1	0.510859175	-0.969002448	0.011525	30311132	Pavir.Eb03924.1	LOC_Os01g71990.1	pyrroline-5-carboxylate reductase, putative, expressed	AT5G14800.1	pyrroline-5- carboxylate (P5C) reductase
C.RT	Pavir.Eb03998.1.p|PACid:30309707	Pavir.Eb03998.1	2.073815172	1.05228732	0.007374	30309707	Pavir.Eb03998.1	LOC_Os01g73160.1	40S ribosomal protein S10, putative, expressed	AT5G52650.1	RNA binding Plectin/S10 domain-containing protein
C.RT	Pavir.Fa00419.1.p|PACid:30186028	Pavir.Fa00419.1	0.51236787	-0.964748086	0.022866
C.RT	Pavir.Fa00544.1.p|PACid:30185761	Pavir.Fa00544.1	0.435267956	-1.200024282	0.014894	30185761	Pavir.Fa00544.1	LOC_Os08g39140.1	heat shock protein, putative, expressed	AT5G56030.1	heat shock protein 81-2
C.RT	Pavir.Fa00975.1.p|PACid:30187167	Pavir.Fa00975.1	0.311882995	-1.680923199	0.034819	30187167	Pavir.Fa00975.1	LOC_Os10g27174.1	40S ribosomal protein S28, putative, expressed	AT3G10090.1	Nucleic acid-binding, OB-fold-like protein
C.RT	Pavir.Fa01323.1.p|PACid:30187368	Pavir.Fa01323.1	0.398022226	-1.329079101	0.007456	30187368	Pavir.Fa01323.1	LOC_Os08g15204.1	thioredoxin domain-containing protein 9, putative, expressed	AT2G18990.1	thioredoxin domain-containing protein 9 homolog
C.RT	Pavir.Fa01933.1.p|PACid:30186872	Pavir.Fa01933.1	0.49960827	-1.001130736	0.032786	30186872	Pavir.Fa01933.1	LOC_Os08g05830.1	transaldolase, putative, expressed	AT1G12230.1	Aldolase superfamily protein
C.RT	Pavir.Fa02371.1.p|PACid:30187421	Pavir.Fa02371.1	0.461170203	-1.116628793	0.007527	30187421	Pavir.Fa02371.1	LOC_Os08g01840.1	nucleic acid binding protein, putative, expressed	AT2G02570.1	nucleic acid binding;RNA binding
C.RT	Pavir.Fb00392.1.p|PACid:30279188	Pavir.Fb00392.1	0.322533675	-1.632478296	0.014414	30279188	Pavir.Fb00392.1	LOC_Os04g41490.1	DNA-directed RNA polymerase III subunit RPC1, putative, expressed	AT4G35800.1	RNA polymerase II large subunit
C.RT	Pavir.Fb00766.1.p|PACid:30279614	Pavir.Fb00766.1	0.368499155	-1.440266784	0.000735	30279614	Pavir.Fb00766.1	LOC_Os05g23610.1	protein phosphatase inhibitor 2 containing protein, expressed	AT5G52200.1	phosphoprotein phosphatase inhibitors
C.RT	Pavir.Fb01457.1.p|PACid:30279046	Pavir.Fb01457.1	0.253508189	-1.979895746	0.015894	30279046	Pavir.Fb01457.1	LOC_Os08g27070.1	co-chaperone protein SBA1, putative, expressed	AT4G02450.1	HSP20-like chaperones superfamily protein
C.RT	Pavir.Fb01805.1.p|PACid:30280700	Pavir.Fb01805.1	0.495502756	-1.013035013	0.025753	30280700	Pavir.Fb01805.1	LOC_Os08g37490.1	14-3-3 protein, putative, expressed	AT1G78300.1	general regulatory factor 2
C.RT	Pavir.Fb01836.1.p|PACid:30278233	Pavir.Fb01836.1	0.3363862	-1.571809575	0.049076
C.RT	Pavir.Fb01976.1.p|PACid:30278006	Pavir.Fb01976.1	0.476686439	-1.068887513	0.005128	30278006	Pavir.Fb01976.1	LOC_Os08g41390.1	peptidyl-prolyl isomerase, putative, expressed	AT3G25230.1	rotamase FKBP 1
C.RT	Pavir.Ga00514.1.p|PACid:30305071	Pavir.Ga00514.1	0.373276395	-1.421683816	0.006292	30305071	Pavir.Ga00514.1	LOC_Os04g58570.1	C2 domain containing protein, putative, expressed	AT1G63220.1	Calcium-dependent lipid-binding (CaLB domain) family protein
C.RT	Pavir.Ga00680.1.p|PACid:30304303	Pavir.Ga00680.1	2.144955673	1.100947834	0.00587
C.RT	Pavir.Ga00735.1.p|PACid:30302898	Pavir.Ga00735.1	0.396452314	-1.334780749	0.015986	30302898	Pavir.Ga00735.1	LOC_Os04g51100.1	COBW domain containing protein, putative, expressed	AT1G80480.1	plastid transcriptionally active 17
C.RT	Pavir.Ga00910.1.p|PACid:30305132	Pavir.Ga00910.1	2.096880762	1.068244826	0.045331	30305132	Pavir.Ga00910.1	LOC_Os04g47770.1	cis-zeatin O-glucosyltransferase, putative, expressed	AT5G38010.1	UDP-Glycosyltransferase superfamily protein
C.RT	Pavir.Ga01298.1.p|PACid:30303852	Pavir.Ga01298.1	0.503104239	-0.991070751	0.005448	30303852	Pavir.Ga01298.1	LOC_Os04g43150.2	nuclear transport factor 2, putative, expressed	AT1G13730.1	Nuclear transport factor 2 (NTF2) family protein with RNA binding (RRM-RBD-RNP motifs) domain
C.RT	Pavir.Gb00190.1.p|PACid:30223152	Pavir.Gb00190.1	0.468457084	-1.094011207	0.006699
C.RT	Pavir.Gb00234.1.p|PACid:30223345	Pavir.Gb00234.1	0.496264638	-1.010818438	0.020784	30223345	Pavir.Gb00234.1	LOC_Os04g58550.1	acyl-CoA-binding domain-containing protein 6, putative, expressed	AT5G53470.1	acyl-CoA binding protein 1
C.RT	Pavir.Gb00702.1.p|PACid:30223872	Pavir.Gb00702.1	0.437249006	-1.193472991	0.003555	30223872	Pavir.Gb00702.1	LOC_Os04g44550.1	CHCH domain containing protein, expressed	AT5G23395.1	Cox19-like CHCH family protein
C.RT	Pavir.Gb01116.1.p|PACid:30221452	Pavir.Gb01116.1	0.491839002	-1.023741951	0.003248	30221452	Pavir.Gb01116.1	LOC_Os04g46620.1	T-complex protein, putative, expressed	AT3G20050.1	T-complex protein 1 alpha subunit
C.RT	Pavir.Gb01520.1.p|PACid:30221920	Pavir.Gb01520.1	0.422898205	-1.241617659	0.017711	30221920	Pavir.Gb01520.1	LOC_Os04g38870.1	14-3-3 protein, putative, expressed	AT3G02520.1	general regulatory factor 7
C.RT	Pavir.Gb01723.1.p|PACid:30222273	Pavir.Gb01723.1	0.371350459	-1.429146734	0.004683
C.RT	Pavir.Gb01731.1.p|PACid:30221721	Pavir.Gb01731.1	0.486432105	-1.039689644	0.014406
C.RT	Pavir.Gb02059.1.p|PACid:30221954	Pavir.Gb02059.1	0.501707826	-0.995080652	0.001346	30221954	Pavir.Gb02059.1	LOC_Os04g20220.1	elongation factor Tu, putative, expressed	AT1G18070.1	Translation elongation factor EF1A/initiation factor IF2gamma family protein
C.RT	Pavir.Gb02127.1.p|PACid:30222110	Pavir.Gb02127.1	0.486188227	-1.040413136	0.001906
C.RT	Pavir.Ha00936.1.p|PACid:30318057	Pavir.Ha00936.1	0.474293307	-1.076148585	0.019688	30318057	Pavir.Ha00936.1	LOC_Os12g14440.1	Jacalin-like lectin domain containing protein, putative, expressed	AT5G42510.1	Disease resistance-responsive (dirigent-like protein) family protein
C.RT	Pavir.Ha01893.1.p|PACid:30317160	Pavir.Ha01893.1	0.502990473	-0.991397021	0.002291	30317160	Pavir.Ha01893.1	LOC_Os12g03822.1	WD domain, G-beta repeat domain containing protein, expressed	AT2G19540.1	Transducin family protein / WD-40 repeat family protein
C.RT	Pavir.Hb00130.1.p|PACid:30265027	Pavir.Hb00130.1	0.383472553	-1.382804773	0.038976	30265027	Pavir.Hb00130.1	LOC_Os07g40250.1	sex determination protein tasselseed-2, putative, expressed	AT4G03140.1	NAD(P)-binding Rossmann-fold superfamily protein
C.RT	Pavir.Hb00623.1.p|PACid:30266504	Pavir.Hb00623.1	0.361758277	-1.466902069	0.005219	30266504	Pavir.Hb00623.1	LOC_Os11g36060.1	THUMP domain-containing protein, putative, expressed	AT5G12410.1	THUMP domain-containing protein
C.RT	Pavir.Hb00704.1.p|PACid:30266743	Pavir.Hb00704.1	0.288144543	-1.795135398	0.012236	30266743	Pavir.Hb00704.1	LOC_Os11g34450.1	14-3-3 protein, putative, expressed	AT3G02520.1	general regulatory factor 7
C.RT	Pavir.Hb01879.1.p|PACid:30266820	Pavir.Hb01879.1	2.783486525	1.476893099	0.016175	30266820	Pavir.Hb01879.1	LOC_Os11g03230.3	nucleoside-triphosphatase, putative, expressed	AT3G04080.1	apyrase 1
C.RT	Pavir.Hb02012.1.p|PACid:30266819	Pavir.Hb02012.1	2.444809309	1.289721942	0.045749	30266819	Pavir.Hb02012.1	LOC_Os12g03470.1	alpha-N-arabinofuranosidase A, putative, expressed	AT3G10740.1	alpha-L-arabinofuranosidase 1
C.RT	Pavir.Ia00792.1.p|PACid:30215810	Pavir.Ia00792.1	0.460131082	-1.119883179	0.010493	30215810	Pavir.Ia00792.1	LOC_Os03g48260.1	expressed protein	AT1G27090.1	glycine-rich protein
C.RT	Pavir.Ia01160.1.p|PACid:30214267	Pavir.Ia01160.1	2.017664554	1.01268634	0.000759	30214267	Pavir.Ia01160.1	LOC_Os03g44150.1	aminotransferase, putative, expressed	AT5G46180.1	ornithine-delta-aminotransferase
C.RT	Pavir.Ia01197.1.p|PACid:30210143	Pavir.Ia01197.1	0.429440672	-1.219469261	0.007158	30210143	Pavir.Ia01197.1	LOC_Os03g43890.1	WD domain, G-beta repeat domain containing protein, expressed	AT5G58230.1	Transducin/WD40 repeat-like superfamily protein
C.RT	Pavir.Ia01238.1.p|PACid:30213740	Pavir.Ia01238.1	0.507619867	-0.978179561	0.011097	30213740	Pavir.Ia01238.1	LOC_Os03g43020.1	prefoldin subunit, putative, expressed	AT1G08780.1	ABI3-interacting protein 3
C.RT	Pavir.Ia01549.1.p|PACid:30215484	Pavir.Ia01549.1	1.964399282	0.9740882	0.022113	30215484	Pavir.Ia01549.1	LOC_Os10g40720.1	expansin precursor, putative, expressed	AT1G65680.1	expansin B2
C.RT	Pavir.Ia01989.1.p|PACid:30210086	Pavir.Ia01989.1	0.375361673	-1.413646747	0.003716	30210086	Pavir.Ia01989.1	LOC_Os10g31000.1	ubiquitin-conjugating enzyme, putative, expressed	AT5G41340.1	ubiquitin conjugating enzyme 4
C.RT	Pavir.Ia02581.1.p|PACid:30209469	Pavir.Ia02581.1	0.500293009	-0.999154803	0.000209	30209469	Pavir.Ia02581.1	LOC_Os08g25460.1	transcription initiation factor, putative, expressed	AT1G03280.1	Transcription factor TFIIE, alpha subunit
C.RT	Pavir.Ia02798.1.p|PACid:30209863	Pavir.Ia02798.1	0.469263437	-1.091530039	0.010839
C.RT	Pavir.Ia03517.1.p|PACid:30210531	Pavir.Ia03517.1	2.169178128	1.117148529	0.001791	30210531	Pavir.Ia03517.1	LOC_Os03g18850.1	pathogenesis-related Bet v I family protein, putative, expressed	AT2G40330.1	PYR1-like 6
C.RT	Pavir.Ia03575.1.p|PACid:30211569	Pavir.Ia03575.1	0.375581683	-1.412801389	0.001042
C.RT	Pavir.Ia03652.1.p|PACid:30210763	Pavir.Ia03652.1	0.424023331	-1.237784447	0.020269
C.RT	Pavir.Ia03818.1.p|PACid:30210874	Pavir.Ia03818.1	0.491897521	-1.02357031	0.016445	30210874	Pavir.Ia03818.1	LOC_Os03g19890.1	NADH dehydrogenase 1 alpha subcomplex subunit 5, putative, expressed	AT5G52840.1	NADH-ubiquinone oxidoreductase-related
C.RT	Pavir.Ia04103.1.p|PACid:30213913	Pavir.Ia04103.1	1.972521314	0.980040889	0.038142	30213913	Pavir.Ia04103.1	LOC_Os03g15340.1	plastocyanin-like domain containing protein, putative, expressed	AT2G02850.1	plantacyanin
C.RT	Pavir.Ia04251.1.p|PACid:30209655	Pavir.Ia04251.1	0.487795678	-1.035651118	0.039456	30209655	Pavir.Ia04251.1	LOC_Os03g05260.1	ankyrin repeat domain containing protein, expressed	AT3G09890.1	Ankyrin repeat family protein
C.RT	Pavir.Ia04764.1.p|PACid:30213378	Pavir.Ia04764.1	0.425120507	-1.234056242	0.006568	30213378	Pavir.Ia04764.1	LOC_Os03g02310.1	RNA binding protein, putative, expressed	AT2G40780.1	Nucleic acid-binding, OB-fold-like protein
C.RT	Pavir.Ib00111.1.p|PACid:30241389	Pavir.Ib00111.1	3.007160759	1.588401994	0.028651	30241389	Pavir.Ib00111.1	LOC_Os03g02070.2	heavy-metal-associated domain-containing protein, putative, expressed	AT5G23760.1	Copper transport protein family
C.RT	Pavir.Ib00250.1.p|PACid:30241046	Pavir.Ib00250.1	0.422438649	-1.243186263	0.008535	30241046	Pavir.Ib00250.1	LOC_Os02g01230.1	ribosomal protein, putative, expressed	AT1G64880.1	Ribosomal protein S5 family protein
C.RT	Pavir.Ib00464.1.p|PACid:30242443	Pavir.Ib00464.1	0.379940807	-1.396153426	0.007468
C.RT	Pavir.Ib00500.1.p|PACid:30241692	Pavir.Ib00500.1	0.455829018	-1.133435326	0.005875	30241692	Pavir.Ib00500.1	LOC_Os03g19890.1	NADH dehydrogenase 1 alpha subcomplex subunit 5, putative, expressed	AT5G52840.1	NADH-ubiquinone oxidoreductase-related
C.RT	Pavir.Ib00926.1.p|PACid:30241947	Pavir.Ib00926.1	0.482046382	-1.052756126	0.019082	30241947	Pavir.Ib00926.1	LOC_Os03g12360.1	trehalose-6-phosphate synthase, putative, expressed	AT1G68020.2	UDP-Glycosyltransferase / trehalose-phosphatase family protein
C.RT	Pavir.Ib01019.1.p|PACid:30241897	Pavir.Ib01019.1	0.487738445	-1.0358204	0.01211	30241897	Pavir.Ib01019.1	LOC_Os03g13970.1	26S proteasome non-ATPase regulatory subunit 4, putative, expressed	AT4G38630.1	regulatory particle non-ATPase 10
C.RT	Pavir.Ib01192.1.p|PACid:30237373	Pavir.Ib01192.1	0.513850392	-0.960579717	0.014995	30237373	Pavir.Ib01192.1	LOC_Os01g08960.1	phosducin-like protein 3, putative, expressed	AT5G14240.1	Thioredoxin superfamily protein
C.RT	Pavir.Ib01232.1.p|PACid:30240992	Pavir.Ib01232.1	0.349707738	-1.515778374	0.004001	30240992	Pavir.Ib01232.1	LOC_Os03g19720.1	EF hand family protein, putative, expressed	AT5G49480.1	Ca2+-binding protein 1
C.RT	Pavir.Ib01296.1.p|PACid:30236907	Pavir.Ib01296.1	0.412127271	-1.278838163	0.001302
C.RT	Pavir.Ib01400.1.p|PACid:30239621	Pavir.Ib01400.1	2.233443259	1.159269603	0.003594	30239621	Pavir.Ib01400.1	LOC_Os03g18850.1	pathogenesis-related Bet v I family protein, putative, expressed	AT2G40330.1	PYR1-like 6
C.RT	Pavir.Ib01462.1.p|PACid:30240410	Pavir.Ib01462.1	2.14057288	1.097996956	0.011463
C.RT	Pavir.Ib01555.1.p|PACid:30239534	Pavir.Ib01555.1	0.505297107	-0.984796174	0.003223	30239534	Pavir.Ib01555.1	LOC_Os03g21520.1	expressed protein	AT2G38580.1	Mitochondrial ATP synthase D chain-related protein
C.RT	Pavir.Ib03330.1.p|PACid:30240420	Pavir.Ib03330.1	0.454672199	-1.137101301	0.020688	30240420	Pavir.Ib03330.1	LOC_Os10g30580.1	cell division control protein 48 homolog E, putative, expressed	AT5G03340.1	ATPase, AAA-type, CDC48 protein
C.RT	Pavir.Ib03607.1.p|PACid:30238969	Pavir.Ib03607.1	0.349062597	-1.518442318	0.009048	30238969	Pavir.Ib03607.1	LOC_Os10g35690.1	ribosomal protein S18 containing protein, expressed	AT1G07210.1	Ribosomal protein S18
C.RT	Pavir.Ib03761.1.p|PACid:30237374	Pavir.Ib03761.1	0.441789337	-1.178569495	0.014573	30237374	Pavir.Ib03761.1	LOC_Os10g37430.1	expressed protein	AT5G41950.1	Tetratricopeptide repeat (TPR)-like superfamily protein
C.RT	Pavir.J00140.1.p|PACid:30185142	Pavir.J00140.1	0.464647632	-1.105791039	0.018329	30185142	Pavir.J00140.1	LOC_Os05g41060.1	ADP-ribosylation factor, putative, expressed	AT5G14670.1	ADP-ribosylation factor A1B
C.RT	Pavir.J00527.1.p|PACid:30273515	Pavir.J00527.1	0.310123765	-1.689084011	0.037887	30273515	Pavir.J00527.1	LOC_Os05g51640.1	adhesion regulating molecule family, putative, expressed	AT2G26590.1	regulatory particle non-ATPase 13
C.RT	Pavir.J00644.1.p|PACid:30255571	Pavir.J00644.1	0.44672528	-1.162540196	0.001915	30255571	Pavir.J00644.1	LOC_Os01g64690.1	LSM domain containing protein, expressed	AT1G76860.1	Small nuclear ribonucleoprotein family protein
C.RT	Pavir.J00857.1.p|PACid:30287452	Pavir.J00857.1	2.584219505	1.369728619	0.024117	30287452	Pavir.J00857.1	LOC_Os05g33700.1	4F5 protein family protein, expressed	AT3G24100.1	Uncharacterised protein family SERF
C.RT	Pavir.J01629.1.p|PACid:30219376	Pavir.J01629.1	0.210010469	-2.251466844	0.033	30219376	Pavir.J01629.1	LOC_Os03g21380.1	OsCML27 - Calmodulin-related calcium sensor protein, expressed	AT5G44460.1	calmodulin like 43
C.RT	Pavir.J01656.1.p|PACid:30207618	Pavir.J01656.1	0.469789308	-1.089914216	0.0066	30207618	Pavir.J01656.1	LOC_Os05g31290.1	acyl carrier protein, putative, expressed	AT1G65290.1	mitochondrial acyl carrier protein 2
C.RT	Pavir.J01684.1.p|PACid:30190681	Pavir.J01684.1	2.230936426	1.157649403	0.001589	30190681	Pavir.J01684.1	LOC_Os05g33130.1	CHIT17 - Chitinase family protein precursor, expressed	AT3G12500.1	basic chitinase
C.RT	Pavir.J01827.1.p|PACid:30287678	Pavir.J01827.1	0.407883629	-1.29377049	0.006975	30287678	Pavir.J01827.1	LOC_Os05g31000.1	nascent polypeptide-associated complex subunit alpha, putative, expressed	AT3G12390.1	Nascent polypeptide-associated complex (NAC), alpha subunit family protein
C.RT	Pavir.J02339.1.p|PACid:30244319	Pavir.J02339.1	2.398343676	1.262038408	0.003236	30244319	Pavir.J02339.1	LOC_Os07g06880.1	gibberellin receptor GID1L2, putative, expressed	AT5G06570.1	alpha/beta-Hydrolases superfamily protein
C.RT	Pavir.J02433.1.p|PACid:30308224	Pavir.J02433.1	0.464427509	-1.106474667	0.001731	30308224	Pavir.J02433.1	LOC_Os05g51500.1	eukaryotic translation initiation factor 5B, putative, expressed	AT1G76810.1	eukaryotic translation initiation factor 2 (eIF-2) family protein
C.RT	Pavir.J02704.1.p|PACid:30275472	Pavir.J02704.1	0.426522574	-1.229305996	0.005562	30275472	Pavir.J02704.1	LOC_Os05g48620.1	tRNA-binding arm, putative, expressed	AT1G79830.1	golgin candidate 5
C.RT	Pavir.J03225.1.p|PACid:30245570	Pavir.J03225.1	0.444496637	-1.169755591	0.0281	30245570	Pavir.J03225.1	LOC_Os03g50540.1	2Fe-2S iron-sulfur cluster binding domain containing protein, expressed	AT5G37510.2	NADH-ubiquinone dehydrogenase, mitochondrial, putative
C.RT	Pavir.J03344.1.p|PACid:30198167	Pavir.J03344.1	0.492155148	-1.022814908	0.012578	30198167	Pavir.J03344.1	LOC_Os07g07580.3	ROOT HAIRLESS 1, putative, expressed	AT1G48380.1	root hair initiation protein root hairless 1 (RHL1)
C.RT	Pavir.J03896.1.p|PACid:30296206	Pavir.J03896.1	0.457120563	-1.129353375	0.010637	30296206	Pavir.J03896.1	LOC_Os05g35460.1	patellin protein, putative, expressed	AT4G09160.1	SEC14 cytosolic factor family protein / phosphoglyceride transfer family protein
C.RT	Pavir.J04551.1.p|PACid:30285341	Pavir.J04551.1	0.462014135	-1.113991105	0.009584	30285341	Pavir.J04551.1	LOC_Os02g44870.1	dehydrin, putative, expressed	AT1G20450.1	Dehydrin family protein
C.RT	Pavir.J06283.1.p|PACid:30274079	Pavir.J06283.1	0.363105984	-1.461537389	0.008146	30274079	Pavir.J06283.1	LOC_Os09g02284.1	DNA-directed RNA polymerase subunit, putative, expressed	AT2G15430.1	DNA-directed RNA polymerase family protein
C.RT	Pavir.J07429.1.p|PACid:30275692	Pavir.J07429.1	0.51304616	-0.962839459	0.00542	30275692	Pavir.J07429.1	LOC_Os12g32986.1	heat shock protein, putative, expressed	AT3G07770.1	HEAT SHOCK PROTEIN 89.1
C.RT	Pavir.J07986.1.p|PACid:30306280	Pavir.J07986.1	0.236438535	-2.080462909	0.014246	30306280	Pavir.J07986.1	LOC_Os08g27070.1	co-chaperone protein SBA1, putative, expressed	AT4G02450.1	HSP20-like chaperones superfamily protein
C.RT	Pavir.J08170.1.p|PACid:30198224	Pavir.J08170.1	0.476105479	-1.070646862	0.010898	30198224	Pavir.J08170.1	LOC_Os06g48350.1	CPuORF14 - conserved peptide uORF-containing transcript, expressed	AT1G36730.1	Translation initiation factor IF2/IF5
C.RT	Pavir.J08673.1.p|PACid:30190581	Pavir.J08673.1	0.491224381	-1.025545926	0.00981	30190581	Pavir.J08673.1	LOC_Os10g30580.1	cell division control protein 48 homolog E, putative, expressed	AT5G03340.1	ATPase, AAA-type, CDC48 protein
C.RT	Pavir.J09862.2.p|PACid:30295104	Pavir.J09862.2	0.465018983	-1.104638485	0.032455
C.RT	Pavir.J09889.1.p|PACid:30199546	Pavir.J09889.1	0.512655587	-0.963938176	0.023062
C.RT	Pavir.J10062.1.p|PACid:30190219	Pavir.J10062.1	0.411906958	-1.279609599	0.000501
C.RT	Pavir.J10872.1.p|PACid:30225142	Pavir.J10872.1	0.432976105	-1.207640688	0.024279
C.RT	Pavir.J11076.2.p|PACid:30314416	Pavir.J11076.2	0.377474205	-1.405550035	0.000791	30314416	Pavir.J11076.2	LOC_Os02g44220.1	peroxisomal biogenesis factor 19, putative, expressed	AT3G03490.1	peroxin 19-1
C.RT	Pavir.J11329.1.p|PACid:30271593	Pavir.J11329.1	0.380141569	-1.395391302	0.00573	30271593	Pavir.J11329.1	LOC_Os08g39140.1	heat shock protein, putative, expressed	AT5G56030.2	heat shock protein 81-2
C.RT	Pavir.J13031.1.p|PACid:30259463	Pavir.J13031.1	2.375290833	1.248104169	0.002937	30259463	Pavir.J13031.1	LOC_Os05g50570.1	OsSCP29 - Putative Serine Carboxypeptidase homologue, expressed	AT1G15000.1	serine carboxypeptidase-like 50
C.RT	Pavir.J13317.1.p|PACid:30272241	Pavir.J13317.1	0.475816609	-1.071522463	0.010231	30272241	Pavir.J13317.1	LOC_Os01g16670.1	BSD domain-containing protein, putative, expressed	AT1G03350.1	BSD domain-containing protein
C.RT	Pavir.J13365.1.p|PACid:30284508	Pavir.J13365.1	0.422950814	-1.241438198	0.001151	30284508	Pavir.J13365.1	LOC_Os07g29320.1	rRNA-processing protein EBP2, putative, expressed	AT3G22660.1	rRNA processing protein-related
C.RT	Pavir.J13770.1.p|PACid:30219886	Pavir.J13770.1	2.078340684	1.055432162	0.004724	30219886	Pavir.J13770.1	LOC_Os01g12720.1	protein kinase domain containing protein, expressed	AT3G24550.1	proline extensin-like receptor kinase 1
C.RT	Pavir.J14234.1.p|PACid:30236731	Pavir.J14234.1	2.041084144	1.029335659	0.005176	30236731	Pavir.J14234.1	LOC_Os06g09610.2	peroxiredoxin, putative, expressed	AT3G26060.1	Thioredoxin superfamily protein
C.RT	Pavir.J14687.1.p|PACid:30245863	Pavir.J14687.1	0.480531254	-1.057297828	0.024123	30245863	Pavir.J14687.1	LOC_Os03g26630.1	SAP domain containing protein, expressed	AT4G39680.1	SAP domain-containing protein
C.RT	Pavir.J14906.1.p|PACid:30195962	Pavir.J14906.1	0.433944142	-1.204418748	0.016587	30195962	Pavir.J14906.1	LOC_Os07g46750.1	elongation factor protein, putative, expressed	AT5G19510.1	Translation elongation factor EF1B/ribosomal protein S6 family protein
C.RT	Pavir.J17511.1.p|PACid:30254185	Pavir.J17511.1	0.506558616	-0.981198877	0.003449	30254185	Pavir.J17511.1	LOC_Os06g06790.1	OsPDIL1-5 protein disulfide isomerase PDIL1-5, expressed	AT3G16110.1	PDI-like 1-6
C.RT	Pavir.J18192.1.p|PACid:30258664	Pavir.J18192.1	2.26789509	1.181353905	0.025774	30258664	Pavir.J18192.1	LOC_Os08g37670.1	plastocyanin-like domain containing protein, putative, expressed	AT2G32300.1	uclacyanin 1
C.RT	Pavir.J23702.1.p|PACid:30198664	Pavir.J23702.1	0.399952209	-1.322100473	0.002193
C.RT	Pavir.J24019.1.p|PACid:30257531	Pavir.J24019.1	0.144359287	-2.79226417	0.018575	30257531	Pavir.J24019.1	LOC_Os12g02300.1	LTPL26 - Protease inhibitor/seed storage/LTP family protein precursor, expressed	AT4G33355.1	Bifunctional inhibitor/lipid-transfer protein/seed storage 2S albumin superfamily protein
C.RT	Pavir.J25957.1.p|PACid:30207883	Pavir.J25957.1	2.235030624	1.160294599	0.026594
C.RT	Pavir.J26594.1.p|PACid:30258559	Pavir.J26594.1	0.508558529	-0.975514276	0.006452	30258559	Pavir.J26594.1	LOC_Os03g49580.1	eukaryotic peptide chain release factor subunit 1-1, putative, expressed	AT3G26618.1	eukaryotic release factor 1-3
C.RT	Pavir.J29419.1.p|PACid:30217064	Pavir.J29419.1	0.492600308	-1.021510565	0.021397	30217064	Pavir.J29419.1	LOC_Os10g25010.1	OsCML8 - Calmodulin-related calcium sensor protein, expressed	AT3G50360.1	centrin2
[truncated: 197 more rows]

## Sheet: RT2inSDT
Tissue/Treatment	prot_acc&ID	prot_acc	Log2 fold (T/C)	Fold (T/C)	p-value	pro_ID	protein_acc	os_annotation_number	os_annotation	arabidopsis_annotation_number	arabidopsis_annotation
[truncated: 362 more rows]

[truncated: 5 more sheets: RT1inSDT, RT2inD1W, RT1inD1W, RT2inD3W, RT1inD3W]
