# Supplementary material for: Comparative Proteomics of Root Apex and Root Elongation Zones Provides Insights into Molecular Mechanisms for Drought Stress and Recovery Adjustment in Switchgrass
Source: Proteomes. 2020 Feb 19;8(1):3. doi: 10.3390/proteomes8010003 (PMC7151713; doi:10.3390/proteomes8010003)
Supplement: Supplementary file 1 [file proteomes-08-00003-s001.zip › Final_Revised_Supplemental Data/TableS3. List of proteins quantifed from RT1 and RT2 and annotation .xlsx]

## Sheet: RT1inD1W
Tissue/Treatment	pro_hit_num	pro_acc	pro_ID	pro_acc_ID	log2_fold	fold_change	p_value	num_pep	Functional group at	Funtion description at	at_acc	at_annota	os_acc	os_annota
RT1/D1W	2	Pavir.J13390.1	30272570	Pavir.J13390.1.p|PACid:30272570	0.56851	1.48299116203495	<.0001	6	Glycolysis	glycolysis.cytosolic branch.glyceraldehyde 3-phosphate dehydrogenase (GAP-DH)	AT3G04120.1	glyceraldehyde-3-phosphate dehydrogenase C subunit 1	LOC_Os08g03290.1	glyceraldehyde-3-phosphate dehydrogenase, putative, expressed
RT1/D1W	106	Pavir.J14181.1	30220580	Pavir.J14181.1.p|PACid:30220580	0.486	1.4005563208872	0.0203	2	DNA synthesis	DNA.synthesis/chromatin structure.histone.core.H2A	AT3G45980.1	Histone superfamily protein	LOC_Os01g05610.1	Core histone H2A/H2B/H3/H4 domain containing protein, putative, expressed
RT1/D1W	129	Pavir.Ib00297.1	30238043	Pavir.Ib00297.1.p|PACid:30238043	0.7361	1.66566699299781	0.0006	2	Cell division & Cell cycle	cell.division	AT5G03340.1	ATPase, AAA-type, CDC48 protein	LOC_Os03g05730.1	cell division control protein 48 homolog E, putative, expressed
RT1/D1W	191	Pavir.Aa02036.1	30251061	Pavir.Aa02036.1.p|PACid:30251061	0.04553	1.03206225631957	0.7484	3	Metal binding	metal handling.binding, chelation and storage	AT3G56240.1	copper chaperone	LOC_Os02g32814.1	heavy metal-associated domain containing protein, expressed
RT1/D1W	218	Pavir.J11143.1	30195240	Pavir.J11143.1.p|PACid:30195240	0.35798	1.28163015687044	0.0009	3	Protein synthesis	protein.synthesis.elongation	AT1G09640.1	Translation elongation factor EF1B, gamma chain	LOC_Os06g37440.1	elongation factor 1-gamma, putative, expressed
RT1/D1W	330	Pavir.Eb02295.1	30310324	Pavir.Eb02295.1.p|PACid:30310324	0.29761	1.22910656115937	<.0001	70	Carbohydrates metabolism	C1-metabolism.glycine hydroxymethyltransferase	AT4G13930.1	serine hydroxymethyltransferase 4	LOC_Os12g22030.1	serine hydroxymethyltransferase, mitochondrial precursor, putative, expressed
RT1/D1W	347	Pavir.J33609.1	30257266	Pavir.J33609.1.p|PACid:30257266	1.39618	2.63203741964981	<.0001	74	Amino acid metabolism	amino acid metabolism.degradation.aspartate family.threonine	AT1G67280.1	Glyoxalase/Bleomycin resistance protein/Dioxygenase superfamily protein	LOC_Os08g09250.2	glyoxalase family protein, putative, expressed
RT1/D1W	399	Pavir.J34253.1	30201307	Pavir.J34253.1.p|PACid:30201307	0.4771	1.39194287061499	0.004	2	Protein degradation	protein.degradation.ubiquitin.proteasom	AT1G53750.1	regulatory particle triple-A 1A	LOC_Os02g54340.1	26S protease regulatory subunit 7, putative, expressed
RT1/D1W	614	Pavir.J13821.1	30314830	Pavir.J13821.1.p|PACid:30314830	0.1536	1.11234167122936	0.6773	2	Redox balance	redox.misc	AT5G20080.1	FAD/NAD(P)-binding oxidoreductase	LOC_Os01g07910.1	NADH-cytochrome b5 reductase, putative, expressed
RT1/D1W	659	Pavir.J22042.1	30217213	Pavir.J22042.1.p|PACid:30217213	0.3229	1.25084237532176	0.018	2	Amino acid metabolism	amino acid metabolism.degradation.aspartate family.methionine	AT4G13940.1	S-adenosyl-L-homocysteine hydrolase	LOC_Os11g26850.2	erythronate-4-phosphate dehydrogenase, putative, expressed
RT1/D1W	840	Pavir.Ia00554.2	30211555	Pavir.Ia00554.2.p|PACid:30211555	0.32777	1.2550718869382	0.0002	6	Cell wall synthesis / modification	cell wall.degradation.cellulases and beta -1,4-glucanases	AT5G20950.1	Glycosyl hydrolase family protein	LOC_Os03g53860.1	periplasmic beta-glucosidase precursor, putative, expressed
RT1/D1W	915	Pavir.Ab02410.1	30232065	Pavir.Ab02410.1.p|PACid:30232065	0.654	1.57352489070713	0.0451	2	Redox balance	redox.ascorbate and glutathione	AT3G48890.1	membrane-associated progesterone binding protein 3	LOC_Os02g42740.1	cytochrome b5-like Heme/Steroid binding domain containing protein, expressed
RT1/D1W	923	Pavir.Aa03532.1	30249042	Pavir.Aa03532.1.p|PACid:30249042	0.4088	1.32758110380523	0.0118	3	Unclassified	not assigned.no ontology.pentatricopeptide (PPR) repeat-containing protein	AT4G22670.1	HSP70-interacting protein 1	LOC_Os02g01030.2	tetratricopeptide repeat domain containing protein, expressed
RT1/D1W	970	Pavir.Fa01398.1	30187564	Pavir.Fa01398.1.p|PACid:30187564	1.4851	2.79936576171424	<.0001	21	Major CHO metabolism	major CHO metabolism.synthesis.starch.AGPase	AT5G48300.1	ADP glucose pyrophosphorylase 1	LOC_Os08g25734.1	glucose-1-phosphate adenylyltransferase large subunit, chloroplast precursor, putative, expressed
RT1/D1W	1187	Pavir.Fb00423.1	30280261	Pavir.Fb00423.1.p|PACid:30280261	-0.4153	0.749863548688073	0.3245	2	Phyto-hormone metabolism	hormone metabolism.gibberelin.synthesis-degradation	AT1G52820.1	2-oxoglutarate (2OG) and Fe(II)-dependent oxygenase superfamily protein	LOC_Os08g32160.1	oxidoreductase, 2OG-FeII oxygenase domain containing protein, putative, expressed
RT1/D1W	1199	Pavir.Ia03723.1	30215975	Pavir.Ia03723.1.p|PACid:30215975	1.14391	2.20979111135678	<.0001	31	Functional enzyme	misc.nitrilases, *nitrile lyases, berberine bridge enzymes, reticuline oxidases, troponine reductases	AT5G13690.1	alpha-N-acetylglucosaminidase family / NAGLU family	LOC_Os04g55730.1	alpha-N-acetylglucosaminidase, putative, expressed
RT1/D1W	1319	Pavir.Ba00131.1	30289716	Pavir.Ba00131.1.p|PACid:30289716	0.85202	1.80502647773169	<.0001	20	Redox balance	redox.dismutases and catalases	AT1G08830.1	copper/zinc superoxide dismutase 1	LOC_Os03g22810.1	copper/zinc superoxide dismutase, putative, expressed
RT1/D1W	1404	Pavir.Eb00442.1	30309330	Pavir.Eb00442.1.p|PACid:30309330	-0.18556	0.879307695467214	<.0001	26	RNA processing	RNA.processing.RNA helicase	AT3G01540.2	DEAD box RNA helicase 1	N	N
RT1/D1W	1438	Pavir.Fb01776.1	30280587	Pavir.Fb01776.1.p|PACid:30280587	0.9482	1.9294638311117	0.0098	2	Mitochondrial electron transport / ATP synthesis	mitochondrial electron transport / ATP synthesis.F1-ATPase	AT3G52300.1	ATP synthase D chain, mitochondrial	LOC_Os08g37320.1	expressed protein
RT1/D1W	1443	Pavir.Ia00224.1	30210354	Pavir.Ia00224.1.p|PACid:30210354	0.1451	1.10580729938507	0.5452	2	Amino acid metabolism	amino acid metabolism.degradation.aromatic aa.tyrosine	AT4G15940.1	Fumarylacetoacetate (FAA) hydrolase family	LOC_Os03g61330.1	fumarylacetoacetase, putative, expressed
RT1/D1W	1594	Pavir.J15705.1	30198132	Pavir.J15705.1.p|PACid:30198132	0.4818	1.39648492513016	0.2924	2	Nucleotide metabolism	nucleotide metabolism.phosphotransfer and pyrophosphatases.nucleoside diphosphate kinase	AT4G23900.1	Nucleoside diphosphate kinase family protein	LOC_Os05g51700.1	nucleoside diphosphate kinase, putative, expressed
RT1/D1W	1604	Pavir.J33347.1	30257661	Pavir.J33347.1.p|PACid:30257661	0.5078	1.42188028246193	<.0001	24	DNA repair	DNA.repair	AT5G28740.1	Tetratricopeptide repeat (TPR)-like superfamily protein	LOC_Os07g44970.1	XPA-binding protein 2, putative, expressed
RT1/D1W	1622	Pavir.Ab03324.1	30232457	Pavir.Ab03324.1.p|PACid:30232457	-0.2088	0.865256632310099	0.3486	2	RNA processing	RNA.processing.splicing	AT4G21660.1	proline-rich spliceosome-associated (PSP) family protein	LOC_Os02g58090.1	PSP domain containing protein, expressed
RT1/D1W	1628	Pavir.J01806.1	30274651	Pavir.J01806.1.p|PACid:30274651	0.1821	1.13453412212337	<.0001	22	Signaling regulation	signalling.G-proteins	AT1G56050.1	GTP-binding protein-related	LOC_Os03g56840.1	GTP-binding protein, putative, expressed
RT1/D1W	1781	Pavir.J33961.1	30274644	Pavir.J33961.1.p|PACid:30274644	-0.01991	0.98629423081011	0.8724	2	Cell wall synthesis / modification	cell wall.cellulose synthesis.cellulose synthase	AT5G05170.1	Cellulose synthase family protein	LOC_Os03g59340.1	CESA2 - cellulose synthase, expressed
RT1/D1W	1832	Pavir.J18032.1	30274659	Pavir.J18032.1.p|PACid:30274659	0.7776	1.7142767089449	0.0008	2	Protein targeting & vesicle tansport	protein.targeting.secretory pathway.golgi	AT3G18480.1	CCAAT-displacement protein alternatively spliced product	LOC_Os03g50300.1	CASP, putative, expressed
RT1/D1W	2142	Pavir.Bb03675.1	30300176	Pavir.Bb03675.1.p|PACid:30300176	1.0589	2.08334244671728	<.0001	5	Unclassified	not assigned.no ontology	AT3G05500.1	Rubber elongation factor protein (REF)	LOC_Os07g47510.1	stress-related protein, putative, expressed
RT1/D1W	2202	Pavir.Ia00267.1	30209647	Pavir.Ia00267.1.p|PACid:30209647	0.28966	1.2223521719575	0.0075	3	Signaling regulation	signalling.G-proteins	AT3G46830.1	RAB GTPase homolog A2C	LOC_Os03g60870.1	ras-related protein, putative, expressed
RT1/D1W	2413	Pavir.J03239.1	30218457	Pavir.J03239.1.p|PACid:30218457	0.24495	1.18505169946766	0.02	2	Regulation of transcription	RNA.regulation of transcription.unclassified	AT3G48050.1	BAH domain ;TFIIS helical bundle-like domain	LOC_Os02g50840.1	BAH domain containing protein, putative, expressed
RT1/D1W	2588	Pavir.J38858.1	30244690	Pavir.J38858.1.p|PACid:30244690	0.08994	1.06432591746237	0.1796	14	Protein modification	protein.postranslational modification	AT2G25620.1	DNA-binding protein phosphatase 1	LOC_Os02g55560.1	protein phosphatase 2C, putative, expressed
RT1/D1W	2799	Pavir.Ca00946.1	30206856	Pavir.Ca00946.1.p|PACid:30206856	0.25772	1.19558773314268	0.0078	9	Protein synthesis	protein.synthesis.initiation	AT5G44320.1	Eukaryotic translation initiation factor 3 subunit 7 (eIF-3)	LOC_Os05g49150.1	eukaryotic translation initiation factor 3 subunit D, putative, expressed
RT1/D1W	2827	Pavir.J20207.1	30281604	Pavir.J20207.1.p|PACid:30281604	-0.04808	0.967222693912188	0.7535	2	Signaling regulation	signalling.light.COP9 signalosome	AT5G43310.1	COP1-interacting protein-related	LOC_Os03g64320.1	expressed protein
RT1/D1W	2849	Pavir.J35722.1	30202813	Pavir.J35722.1.p|PACid:30202813	-0.07222	0.951173218604347	0.7317	3	Minor CHO metabolism	minor CHO metabolism.others	AT5G15140.1	Galactose mutarotase-like superfamily protein	LOC_Os04g38540.2	aldose 1-epimerase, putative, expressed
RT1/D1W	2855	Pavir.Bb03285.1	30297150	Pavir.Bb03285.1.p|PACid:30297150	0.15334	1.11214122500369	0.0929	13	Unclassified	not assigned.no ontology.pentatricopeptide (PPR) repeat-containing protein	AT5G60960.1	Pentatricopeptide repeat (PPR) superfamily protein	LOC_Os07g41260.1	PPR repeat domain containing protein, putative, expressed
RT1/D1W	2864	Pavir.Eb00412.1	30310138	Pavir.Eb00412.1.p|PACid:30310138	1.1957	2.2905594379884	<.0001	3	Fermentation	fermentation.PDC	AT5G54960.1	pyruvate decarboxylase-2	LOC_Os01g06660.1	thiamine pyrophosphate enzyme, C-terminal TPP binding domain containing protein, expressed
RT1/D1W	2898	Pavir.Ea03723.1	30225960	Pavir.Ea03723.1.p|PACid:30225960	0.7611	1.69478233918102	0.0425	4	Nucleotide metabolism	nucleotide metabolism.phosphotransfer and pyrophosphatases.misc	AT2G46860.1	pyrophosphorylase 3	LOC_Os04g59040.1	soluble inorganic pyrophosphatase, putative, expressed
RT1/D1W	3031	Pavir.Ba01833.1	30293484	Pavir.Ba01833.1.p|PACid:30293484	-0.16532	0.891730705282874	0.0343	17	Protein synthesis	protein.synthesis.ribosomal protein.eukaryotic.60S subunit.L34	AT1G26880.1	Ribosomal protein L34e superfamily protein	LOC_Os09g24690.1	60S ribosomal protein L34, putative, expressed
RT1/D1W	3152	Pavir.J35859.1	30258904	Pavir.J35859.1.p|PACid:30258904	0.1227	1.08877058831576	0.3725	3	Unclassified	not assigned.no ontology.pentatricopeptide (PPR) repeat-containing protein	AT1G61870.1	pentatricopeptide repeat 336	LOC_Os10g34370.1	expressed protein
RT1/D1W	3204	Pavir.J00870.1	30243793	Pavir.J00870.1.p|PACid:30243793	0.002822	1.00195797567951	0.9889	3	Cell division & Cell cycle	cell.division	AT3G57090.1	Tetratricopeptide repeat (TPR)-like superfamily protein	LOC_Os05g31770.1	tetratricopeptide repeat containing protein, putative, expressed
RT1/D1W	3209	Pavir.Aa03334.1	30251768	Pavir.Aa03334.1.p|PACid:30251768	0.5384	1.45236090403207	0.0129	2			AT5G25060.1	RNA recognition motif (RRM)-containing protein	LOC_Os02g08360.1	RNA recognition motif, putative, expressed
RT1/D1W	3226	Pavir.J19264.1	30256000	Pavir.J19264.1.p|PACid:30256000	0.3929	1.31303010995796	0.1167	2			AT5G46190.1	RNA-binding KH domain-containing protein	LOC_Os08g10030.2	KH domain-containing protein, putative, expressed
RT1/D1W	3241	Pavir.Ib02304.1	30241540	Pavir.Ib02304.1.p|PACid:30241540	1.0099	2.01377151127118	<.0001	3	Protein degradation	protein.degradation.ubiquitin.ubiquitin protease	AT4G17890.1	ARF-GAP domain 8	LOC_Os10g42420.1	GTPase-activating protein, putative, expressed
RT1/D1W	3301	Pavir.Ib03541.1	30239943	Pavir.Ib03541.1.p|PACid:30239943	0.4408	1.35735679722908	0.0033	3	Regulation of transcription	RNA.regulation of transcription.unclassified	AT5G23290.1	prefoldin 5	LOC_Os10g34670.1	prefoldin, putative, expressed
RT1/D1W	3370	Pavir.J21405.1	30287742	Pavir.J21405.1.p|PACid:30287742	0.05006	1.03530798019449	0.5918	7	Transport	transport.porins	AT3G01280.1	voltage dependent anion channel 1	LOC_Os01g40570.1	outer mitochondrial membrane porin, putative, expressed
RT1/D1W	3402	Pavir.Ea02005.1	30225929	Pavir.Ea02005.1.p|PACid:30225929	0.5936	1.50900752479012	0.041	2	Unclassified	not assigned.unknown	AT3G62140.1	N	LOC_Os01g21860.1	AGAP010768-PA, putative, expressed
RT1/D1W	3413	Pavir.Fb00411.1	30280383	Pavir.Fb00411.1.p|PACid:30280383	-0.1438	0.905131932115196	0.3498	2	Protein degradation	protein.degradation.ubiquitin.E3.RING	AT1G32360.1	Zinc finger (CCCH-type) family protein	LOC_Os08g06330.1	zinc finger C-x8-C-x5-C-x3-H type family protein, expressed
RT1/D1W	3505	Pavir.J02571.1	30217873	Pavir.J02571.1.p|PACid:30217873	0.09699	1.06953967437545	0.2855	2	Nucleotide metabolism	nucleotide metabolism.salvage.NUDIX hydrolases	AT3G12600.1	nudix hydrolase homolog 16	LOC_Os03g59580.1	hydrolase, NUDIX family, domain containing protein, expressed
RT1/D1W	3539	Pavir.Fa00307.1	30188679	Pavir.Fa00307.1.p|PACid:30188679	-0.8544	0.553095304704852	0.0201	7	Signaling regulation	signalling.calcium	AT2G44310.1	Calcium-binding EF-hand family protein	LOC_Os09g31025.1	EF hand family protein, expressed
RT1/D1W	3617	Pavir.Eb01923.1	30309733	Pavir.Eb01923.1.p|PACid:30309733	0.39017	1.31054782319005	<.0001	15	Nucleotide metabolism	nucleotide metabolism.synthesis.pyrimidine.CTP synthetase	AT3G12670.1	CTP synthase family protein	LOC_Os01g43020.1	CTP synthase, putative, expressed
RT1/D1W	3620	Pavir.Ba01110.1	30289837	Pavir.Ba01110.1.p|PACid:30289837	0.03814	1.02678918112921	0.7445	3	Regulation of transcription	RNA.regulation of transcription.bZIP transcription factor family	AT1G06070.1	Basic-leucine zipper (bZIP) transcription factor family protein	LOC_Os09g34060.1	transcription factor RF2a, putative, expressed
RT1/D1W	3662	Pavir.Aa00465.1	30250144	Pavir.Aa00465.1.p|PACid:30250144	-0.47217	0.72087948587604	<.0001	8	Unclassified	not assigned.unknown	AT5G38720.1	N	LOC_Os02g49620.1	expressed protein
RT1/D1W	3695	Pavir.J30810.1	30244365	Pavir.J30810.1.p|PACid:30244365	-0.003279	0.997729751316449	0.9793	2	Major CHO metabolism	major CHO metabolism.degradation.sucrose.invertases.cell wall	AT3G13790.2	Glycosyl hydrolases family 32 protein	LOC_Os09g08072.1	glycosyl hydrolases, putative, expressed
RT1/D1W	3764	Pavir.J25919.1	30284636	Pavir.J25919.1.p|PACid:30284636	-0.04934	0.966378323806791	0.5979	3	Unclassified	not assigned.unknown	N	N	LOC_Os06g40460.1	expressed protein
RT1/D1W	3802	Pavir.J05131.1	30220804	Pavir.J05131.1.p|PACid:30220804	-0.1781	0.883866263999453	0.3344	2	Unclassified	not assigned.unknown	AT5G64160.1	N	LOC_Os02g51700.1	expressed protein
RT1/D1W	3851	Pavir.Ia04588.1	30213390	Pavir.Ia04588.1.p|PACid:30213390	0.9428	1.92225535712938	0.0082	2	Mitochondrial electron transport / ATP synthesis	mitochondrial electron transport / ATP synthesis.NADH-DH.localisation not clear	AT2G02050.1	NADH-ubiquinone oxidoreductase B18 subunit, putative	LOC_Os03g03770.1	expressed protein
RT1/D1W	3893	Pavir.Bb02775.1	30301078	Pavir.Bb02775.1.p|PACid:30301078	0.07666	1.05457375633925	0.2041	14	Unclassified	not assigned.unknown	AT2G03070.1	mediator subunit 8	LOC_Os03g31010.1	expressed protein
RT1/D1W	3928	Pavir.Ab01897.3	30236213	Pavir.Ab01897.3.p|PACid:30236213	0.249	1.18838310505693	0.1013	2	RNA processing	RNA.processing.ribonucleases	AT3G60500.1	3\'-5\'-exoribonuclease family protein	LOC_Os02g34570.1	exosome complex exonuclease, putative, expressed
RT1/D1W	3959	Pavir.J02251.2	30274613	Pavir.J02251.2.p|PACid:30274613	1.0449	2.06322334190196	0.002	4	Abiotic/biotic stress	stress.abiotic.heat	AT5G51440.1	HSP20-like chaperones superfamily protein	LOC_Os02g52150.2	heat shock 22 kDa protein, mitochondrial precursor, putative, expressed
RT1/D1W	3974	Pavir.Ib03290.1	30242701	Pavir.Ib03290.1.p|PACid:30242701	-0.01823	0.987443426862015	0.912	2	Unclassified	not assigned.unknown	AT1G03900.1	non-intrinsic ABC protein 4	LOC_Os10g33630.1	adaptin ear-binding coat-associated protein 2, putative, expressed
RT1/D1W	4005	Pavir.Ea01581.1	30227216	Pavir.Ea01581.1.p|PACid:30227216	0.4498	1.36585089648965	0.0014	4	Cell organization	cell.organisation	AT5G20490.1	Myosin family protein with Dil domain	LOC_Os03g48140.1	myosin, putative, expressed
RT1/D1W	4085	Pavir.J08286.1	30248787	Pavir.J08286.1.p|PACid:30248787	-0.006277	0.995658566534857	0.9761	3	S-assimilation	S-assimilation.sulfite oxidase	AT3G01910.3	sulfite oxidase	LOC_Os08g41830.1	sulfite oxidase, putative, expressed
RT1/D1W	4087	Pavir.Gb01204.1	30224019	Pavir.Gb01204.1.p|PACid:30224019	1.3225	2.50099123249738	<.0001	6	Amino acid metabolism	amino acid metabolism.synthesis.branched chain group.isoleucine specific	AT4G11640.1	serine racemase	LOC_Os04g46930.1	serine racemase, putative, expressed
RT1/D1W	4112	Pavir.Ia00765.1	30214427	Pavir.Ia00765.1.p|PACid:30214427	0.16684	1.12259691518774	0.0168	6	Nucleotide metabolism	nucleotide metabolism.synthesis.purine.adenylosuccinate synthase	AT3G57610.1	adenylosuccinate synthase	LOC_Os03g49220.1	adenylosuccinate synthetase, chloroplast precursor, putative, expressed
RT1/D1W	4130	Pavir.Gb01215.1	30223867	Pavir.Gb01215.1.p|PACid:30223867	0.848	1.80000385958702	<.0001	3	Functional enzyme	misc.short chain dehydrogenase/reductase (SDR)	AT2G24190.2	NAD(P)-binding Rossmann-fold superfamily protein	LOC_Os04g44920.1	oxidoreductase, short chain dehydrogenase/reductase family domain containing protein, expressed
RT1/D1W	4172	Pavir.J20482.1	30294546	Pavir.J20482.1.p|PACid:30294546	0.25777	1.19562916977404	0.0003	3			N	N	N	N
RT1/D1W	4237	Pavir.Bb03606.1	30300086	Pavir.Bb03606.1.p|PACid:30300086	2.9888	7.93813446210075	<.0001	7	Unclassified	not assigned.unknown	AT1G02700.1	N	LOC_Os07g47840.1	expressed protein
RT1/D1W	4265	Pavir.Ga00233.1	30304634	Pavir.Ga00233.1.p|PACid:30304634	0.409	1.32776515838244	0.0008	5	Regulation of transcription	RNA.regulation of transcription.MYB-related transcription factor family	AT5G08520.1	Duplicated homeodomain-like superfamily protein	LOC_Os04g58020.1	MYB_Al protein, putative, expressed
RT1/D1W	4268	Pavir.Bb03257.1	30300224	Pavir.Bb03257.1.p|PACid:30300224	-0.8724	0.546237399387903	0.0217	2	Mitochondrial electron transport / ATP synthesis	mitochondrial electron transport / ATP synthesis.cytochrome c oxidase	AT1G22450.1	cytochrome C oxidase 6B	LOC_Os07g42910.1	cytochrome c oxidase subunit, putative, expressed
RT1/D1W	4280	Pavir.J37334.1	30185413	Pavir.J37334.1.p|PACid:30185413	-0.2284	0.853581018669179	0.1007	2	Regulation of transcription	RNA.regulation of transcription	AT1G79730.1	hydroxyproline-rich glycoprotein family protein	LOC_Os08g06070.1	ELF7, putative, expressed
RT1/D1W	4301	Pavir.J18350.1	30220681	Pavir.J18350.1.p|PACid:30220681	0.3885	1.30903166865326	0.1942	2	Functional enzyme	misc.beta 1,3 glucan hydrolases.glucan endo-1,3-beta-glucosidase	AT3G07320.1	O-Glycosyl hydrolases family 17 protein	LOC_Os09g32550.2	glucan endo-1,3-beta-glucosidase precursor, putative, expressed
RT1/D1W	4305	Pavir.Fa00991.1	30188199	Pavir.Fa00991.1.p|PACid:30188199	-0.1745	0.886074555933964	0.0973	5	Unclassified	not assigned.no ontology	AT5G13020.1	Emsy N Terminus (ENT)/ plant Tudor-like domains-containing protein	LOC_Os08g23930.2	ENT domain containing protein, expressed
RT1/D1W	4378	Pavir.Aa02604.1	30250918	Pavir.Aa02604.1.p|PACid:30250918	-0.08942	0.939900537125005	0.3591	5	Unclassified	not assigned.no ontology.hydroxyproline rich proteins	AT2G18910.1	hydroxyproline-rich glycoprotein family protein	LOC_Os02g26370.1	wiskott-Aldrich syndrome protein family member 2, putative, expressed
RT1/D1W	4436	Pavir.Db01810.1	30260530	Pavir.Db01810.1.p|PACid:30260530	0.9899	1.98604732379265	<.0001	3	Protein degradation	protein.degradation	AT5G36210.1	alpha/beta-Hydrolases superfamily protein	LOC_Os06g11180.1	OsPOP12 - Putative Prolyl Oligopeptidase homologue, expressed
RT1/D1W	4464	Pavir.J35001.1	30245391	Pavir.J35001.1.p|PACid:30245391	0.15088	1.11024648208165	0.0294	6	Unclassified	not assigned.unknown	AT1G80210.1	Mov34/MPN/PAD-1 family protein	LOC_Os05g46490.1	mov34 family protein, putative, expressed
RT1/D1W	4466	Pavir.Ga00445.1	30304202	Pavir.Ga00445.1.p|PACid:30304202	0.4333	1.35031874682002	0.0063	3	Unclassified	not assigned.unknown	AT1G56080.1	N	LOC_Os04g52570.1	expressed protein
RT1/D1W	4607	Pavir.Aa02622.1	30253757	Pavir.Aa02622.1.p|PACid:30253757	1.2976	2.45819608334284	0.0004	2	Unclassified	not assigned.unknown	N	N	LOC_Os02g26470.1	expressed protein
RT1/D1W	4608	Pavir.Eb02921.1	30313326	Pavir.Eb02921.1.p|PACid:30313326	0.20056	1.14914432308007	0.0213	3	Signaling regulation	signalling.MAP kinases	AT5G56580.1	MAP kinase kinase 6	LOC_Os01g32660.1	STE_MEK_ste7_MAP2K.2 - STE kinases include homologs to sterile 7, sterile 11 and sterile 20 from yeast, expressed
RT1/D1W	4610	Pavir.Ib03281.1	30237958	Pavir.Ib03281.1.p|PACid:30237958	0.409	1.32776515838244	0.004	3			AT1G71220.2	UDP-glucose:glycoprotein glucosyltransferases;transferases, transferring hexosyl groups;transferases, transferring glycosyl groups	N	N
RT1/D1W	4617	Pavir.J24312.1	30306501	Pavir.J24312.1.p|PACid:30306501	0.7869	1.72536309188418	<.0001	2	Pentose phosphate pathway	OPP.oxidative PP.G6PD	AT1G09420.2	glucose-6-phosphate dehydrogenase 4	LOC_Os03g20300.1	glucose-6-phosphate 1-dehydrogenase, chloroplast precursor, putative, expressed
RT1/D1W	4624	Pavir.J10608.1	30315322	Pavir.J10608.1.p|PACid:30315322	0.29977	1.23094815520528	<.0001	9	Cell organization	cell.organisation	AT2G37080.1	ROP interactive partner 3	LOC_Os01g61760.1	myosin heavy chain-related, putative, expressed
RT1/D1W	4625	Pavir.Ga02084.1	30302549	Pavir.Ga02084.1.p|PACid:30302549	0.36902	1.29147525382686	<.0001	11	Unclassified	not assigned.unknown	AT1G77540.1	Acyl-CoA N-acyltransferases (NAT) superfamily protein	LOC_Os04g35200.1	expressed protein
RT1/D1W	4665	Pavir.J35936.1	30267462	Pavir.J35936.1.p|PACid:30267462	0.38491	1.30577832585719	0.0002	3			AT2G03270.1	DNA-binding protein, putative	N	N
RT1/D1W	4670	Pavir.Fb01980.1	30280991	Pavir.Fb01980.1.p|PACid:30280991	0.0514	1.03627003879565	0.7294	5	Abiotic/biotic stress	stress.biotic	AT3G25070.1	RPM1 interacting protein 4	LOC_Os08g41470.2	proteophosphoglycan ppg4, putative, expressed
RT1/D1W	4693	Pavir.Ca00549.1	30205232	Pavir.Ca00549.1.p|PACid:30205232	-0.2964	0.814281764925576	0.0105	4	Signaling regulation	signalling.G-proteins	AT3G11730.1	Ras-related small GTP-binding family protein	LOC_Os05g01490.1	ras-related protein, putative, expressed
RT1/D1W	4699	Pavir.Ia02503.1	30210528	Pavir.Ia02503.1.p|PACid:30210528	0.20766	1.15481359751335	0.0021	9	Unclassified	not assigned.no ontology	AT2G03820.1	nonsense-mediated mRNA decay NMD3 family protein	LOC_Os10g42320.1	nonsense-mediated mRNA decay protein 3, putative, expressed
RT1/D1W	4756	Pavir.Ga01307.1	30303413	Pavir.Ga01307.1.p|PACid:30303413	0.2938	1.22586490731235	0.0103	4	Unclassified	not assigned.unknown	AT1G20770.1	N	LOC_Os04g43040.2	expressed protein
RT1/D1W	4804	Pavir.Db00505.1	30259874	Pavir.Db00505.1.p|PACid:30259874	0.1472	1.10741809458952	0.4911	2	Unclassified	not assigned.unknown	AT1G16840.1	N	LOC_Os06g45060.1	expressed protein
RT1/D1W	4817	Pavir.Ba00676.1	30291808	Pavir.Ba00676.1.p|PACid:30291808	-0.02381	0.983631607776767	0.7476	2	Regulation of transcription	RNA.regulation of transcription.bHLH,Basic Helix-Loop-Helix family	AT2G42280.1	basic helix-loop-helix (bHLH) DNA-binding superfamily protein	LOC_Os08g39630.1	helix-loop-helix DNA-binding domain containing protein, expressed
RT1/D1W	4883	Pavir.J32216.1	30200413	Pavir.J32216.1.p|PACid:30200413	-0.003157	0.997814126858782	0.9717	6	Protein synthesis	protein.synthesis.ribosome biogenesis.Pre-rRNA processing and modifications.WD-repeat proteins	AT5G14050.1	Transducin/WD40 repeat-like superfamily protein	LOC_Os07g41190.1	WD domain, G-beta repeat domain containing protein, expressed
RT1/D1W	4917	Pavir.Bb03196.1	30298331	Pavir.Bb03196.1.p|PACid:30298331	-0.01258	0.991318115589984	0.9169	6	Unclassified	not assigned.unknown	AT2G44260.1	Plant protein of unknown function (DUF946)	LOC_Os07g38840.1	expressed protein
RT1/D1W	4925	Pavir.Gb00365.1	30223941	Pavir.Gb00365.1.p|PACid:30223941	0.6158	1.53240750869328	0.0162	2	Unclassified	not assigned.no ontology.C2 domain-containing protein	AT1G05500.1	Calcium-dependent lipid-binding (CaLB domain) family protein	LOC_Os04g55220.1	C2 domain containing protein, expressed
RT1/D1W	4965	Pavir.J35809.1	30199128	Pavir.J35809.1.p|PACid:30199128	-0.002917	0.997980132358049	0.9862	2	Signaling regulation	signalling.calcium	AT5G37770.1	EF hand calcium-binding protein family	LOC_Os05g13580.1	OsCML18 - Calmodulin-related calcium sensor protein, expressed
RT1/D1W	4970	Pavir.J07255.1	30243688	Pavir.J07255.1.p|PACid:30243688	0.4626	1.37802303089327	0.0106	2	Protein synthesis	protein.synthesis.ribosomal protein.eukaryotic.60S subunit.L24	AT2G44860.1	Ribosomal protein L24e family protein	LOC_Os01g33050.1	ribosomal protein L24, putative, expressed
RT1/D1W	4996	Pavir.Db01124.1	30261443	Pavir.Db01124.1.p|PACid:30261443	1.0914	2.13080711007045	<.0001	8	Regulation of transcription	RNA.regulation of transcription.SNF7	AT4G29160.1	SNF7 family protein	LOC_Os06g40620.1	SNF7 domain containing protein, putative, expressed
RT1/D1W	5050	Pavir.J03157.1	30243423	Pavir.J03157.1.p|PACid:30243423	-0.6089	0.655696454947608	0.0221	2	Protein synthesis	protein.synthesis.ribosome biogenesis.Pre-rRNA processing and modifications.misc	AT3G22660.1	rRNA processing protein-related	LOC_Os07g29320.1	rRNA-processing protein EBP2, putative, expressed
RT1/D1W	5051	Pavir.J07041.1	30225772	Pavir.J07041.1.p|PACid:30225772	-0.03509	0.975970874645701	0.4348	8	Regulation of transcription	RNA.regulation of transcription.C3H zinc finger family	AT2G41900.1	CCCH-type zinc finger protein with ARM repeat domain	LOC_Os07g38090.1	zinc finger family protein, putative, expressed
RT1/D1W	5064	Pavir.Db00124.1	30261430	Pavir.Db00124.1.p|PACid:30261430	3.9423	15.3727141569573	<.0001	3	Unclassified	not assigned.unknown	AT2G38465.1	N	LOC_Os06g44190.1	expressed protein
RT1/D1W	5084	Pavir.J17207.1	30189725	Pavir.J17207.1.p|PACid:30189725	2.2705	4.82490320505563	<.0001	6	Unclassified	not assigned.unknown	N	N	LOC_Os03g26490.1	expressed protein
RT1/D1W	5118	Pavir.J06845.1	30258148	Pavir.J06845.1.p|PACid:30258148	0.4566	1.37230389507354	<.0001	8	Cell wall synthesis / modification	cell wall.pectin esterases.acetyl esterase	AT3G05910.1	Pectinacetylesterase family protein	LOC_Os07g44070.1	pectinacetylesterase domain containing protein, expressed
RT1/D1W	5155	Pavir.J13125.1	30198121	Pavir.J13125.1.p|PACid:30198121	-0.04467	0.969511556260505	0.7287	7	Cell wall synthesis / modification	cell wall.modification	AT5G57560.1	Xyloglucan endotransglucosylase/hydrolase family protein	LOC_Os06g48160.1	glycosyl hydrolases family 16, putative, expressed
RT1/D1W	5162	Pavir.Fa01559.1	30186940	Pavir.Fa01559.1.p|PACid:30186940	-0.1129	0.924727373109456	0.3159	2	RNA processing	RNA.processing.splicing	AT1G60200.1	splicing factor PWI domain-containing protein / RNA recognition motif (RRM)-containing protein	LOC_Os11g07490.1	RNA recognition motif containing protein, putative, expressed
RT1/D1W	5183	Pavir.J27744.1	30219394	Pavir.J27744.1.p|PACid:30219394	0.24714	1.18685196490154	0.0125	8	Regulation of transcription	RNA.regulation of transcription.putative transcription regulator	AT5G43500.2	actin-related protein 9	N	N
RT1/D1W	5203	Pavir.J34227.1	30272706	Pavir.J34227.1.p|PACid:30272706	0.741	1.67133391784371	<.0001	7	DNA synthesis	DNA.synthesis/chromatin structure	AT3G09100.2	mRNA capping enzyme family protein	LOC_Os11g11070.1	mRNA-capping enzyme, putative, expressed
RT1/D1W	5294	Pavir.Ba00674.1	30292978	Pavir.Ba00674.1.p|PACid:30292978	0.29322	1.22537217757745	0.0006	8	Transport	transport.calcium	AT2G38270.1	CAX-interacting protein 2	LOC_Os12g07650.1	OsGrx_S16 - glutaredoxin subgroup II, expressed
RT1/D1W	5316	Pavir.Ha00872.1	30317806	Pavir.Ha00872.1.p|PACid:30317806	0.42233	1.34009009766492	<.0001	4	Unclassified	not assigned.no ontology	AT1G10950.1	transmembrane nine 1	LOC_Os11g07910.1	transmembrane 9 superfamily member, putative, expressed
RT1/D1W	5370	Pavir.J21650.1	30195435	Pavir.J21650.1.p|PACid:30195435	-0.2307	0.852221291086329	0.3637	2	Unclassified	not assigned.unknown	N	N	LOC_Os11g47770.1	selT/selW/selH selenoprotein domain containing protein, expressed
RT1/D1W	5373	Pavir.Hb00162.1	30266722	Pavir.Hb00162.1.p|PACid:30266722	1.0273	2.03820618223028	<.0001	4	Unclassified	not assigned.no ontology	AT3G14120.1	N	LOC_Os11g42420.1	nuclear pore protein 84/107 containing protein, expressed
RT1/D1W	5390	Pavir.Eb02747.1	30313453	Pavir.Eb02747.1.p|PACid:30313453	0.3047	1.23516176575176	0.0916	3	Protein degradation	protein.degradation.aspartate protease	AT3G12700.1	Eukaryotic aspartyl protease family protein	LOC_Os05g48330.1	aspartyl protease family protein, putative, expressed
RT1/D1W	5432	Pavir.J09036.1	30247103	Pavir.J09036.1.p|PACid:30247103	-0.19813	0.871679689696582	0.0029	3	Cell organization	cell.organisation	AT3G16630.1	P-loop containing nucleoside triphosphate hydrolases superfamily protein	LOC_Os05g06280.2	ATKINESIN-13A/KINESIN-13A, putative, expressed
RT1/D1W	5467	Pavir.Ga00369.1	30304509	Pavir.Ga00369.1.p|PACid:30304509	-0.7186	0.607686859170707	0.0462	2	Unclassified	not assigned.unknown	N	N	LOC_Os04g54210.1	expressed protein
RT1/D1W	5498	Pavir.J31656.1	30284377	Pavir.J31656.1.p|PACid:30284377	0.52995	1.44387915361712	0.0002	2	Regulation of transcription	RNA.regulation of transcription.bZIP transcription factor family	AT3G58120.1	Basic-leucine zipper (bZIP) transcription factor family protein	LOC_Os02g14910.1	bZIP transcription factor family protein, putative, expressed
RT1/D1W	5520	Pavir.Ea00362.1	30228102	Pavir.Ea00362.1.p|PACid:30228102	-0.3359	0.792289726360725	0.0062	5	Regulation of transcription	RNA.regulation of transcription.C3H zinc finger family	AT2G19810.1	CCCH-type zinc finger family protein	LOC_Os01g09620.1	zinc finger/CCCH transcription factor, putative, expressed
RT1/D1W	5558	Pavir.Ab02096.1	30233641	Pavir.Ab02096.1.p|PACid:30233641	-0.1241	0.917576278566009	0.3286	3	Functional enzyme	misc.cytochrome P450	AT5G25140.1	cytochrome P450, family 71, subfamily B, polypeptide 13	LOC_Os04g27020.1	cytochrome P450, putative, expressed
RT1/D1W	5595	Pavir.Fa01940.1	30186744	Pavir.Fa01940.1.p|PACid:30186744	-0.006305	0.995639242860386	0.9693	3	Unclassified	not assigned.unknown	AT2G39170.1	N	LOC_Os08g05630.1	expressed protein
RT1/D1W	5603	Pavir.J01086.1	30314805	Pavir.J01086.1.p|PACid:30314805	0.37116	1.29339236573715	<.0001	5			AT4G10110.1	RNA-binding (RRM/RBD/RNP motifs) family protein	LOC_Os05g35274.2	RNA recognition motif containing protein, putative, expressed
RT1/D1W	5625	Pavir.J16711.1	30307668	Pavir.J16711.1.p|PACid:30307668	1.4881	2.80519293570357	0.0013	3	Unclassified	not assigned.unknown	AT5G45690.1	Protein of unknown function (DUF1264)	LOC_Os01g52830.1	DUF1264 domain containing protein, putative, expressed
RT1/D1W	5630	Pavir.Hb01685.1	30266234	Pavir.Hb01685.1.p|PACid:30266234	0.02485	1.01737390812509	0.8812	3	Signaling regulation	signalling.calcium	AT4G09570.1	calcium-dependent protein kinase 4	LOC_Os11g07040.1	CAMK_CAMK_like.43 - CAMK includes calcium/calmodulin depedent protein kinases, expressed
RT1/D1W	5646	Pavir.Ga00089.1	30304071	Pavir.Ga00089.1.p|PACid:30304071	0.20398	1.15187167390661	0.0116	3	Signaling regulation	signalling.receptor kinases.leucine rich repeat III	AT5G67200.1	Leucine-rich repeat protein kinase family protein	LOC_Os04g55620.1	receptor kinase, putative, expressed
RT1/D1W	5655	Pavir.Eb03617.1	30309034	Pavir.Eb03617.1.p|PACid:30309034	-0.06437	0.956362853557524	0.7912	2	RNA synthesis	RNA.transcription	AT3G10070.1	TBP-associated factor 12	LOC_Os01g63940.1	Transcription initiation factor TFIID subunit A containing protein, expressed
RT1/D1W	5676	Pavir.Ib03044.1	30242865	Pavir.Ib03044.1.p|PACid:30242865	0.21893	1.16387006170448	0.0156	9	Abiotic/biotic stress	stress.abiotic.drought/salt	AT4G19120.1	S-adenosyl-L-methionine-dependent methyltransferases superfamily protein	LOC_Os10g36690.1	dehydration response related protein, putative, expressed
RT1/D1W	5694	Pavir.J30051.1	30221128	Pavir.J30051.1.p|PACid:30221128	0.61455	1.53108035379221	<.0001	5	Protein targeting & vesicle tansport	protein.targeting.secretory pathway.ER	AT2G39960.1	Microsomal signal peptidase 25 kDa subunit (SPC25)	LOC_Os04g36859.1	signal peptidase complex subunit 2, putative, expressed
RT1/D1W	5705	Pavir.Ca01988.1	30206276	Pavir.Ca01988.1.p|PACid:30206276	-0.2665	0.831333930057165	<.0001	7	Unclassified	not assigned.unknown	AT3G08890.1	Protein of unknown function, DUF538	LOC_Os05g27950.1	DUF538 domain containing protein, putative, expressed
RT1/D1W	5718	Pavir.J09067.1	30246847	Pavir.J09067.1.p|PACid:30246847	-0.04531	0.969081562554098	0.7507	3	Unclassified	not assigned.unknown	N	N	LOC_Os02g09890.1	protein kinase PKN/PRK1, effector, putative, expressed
RT1/D1W	5727	Pavir.J15578.1	30267144	Pavir.J15578.1.p|PACid:30267144	0.1521	1.11118574751259	0.4989	3	Minor CHO metabolism	minor CHO metabolism.others	AT3G47800.1	Galactose mutarotase-like superfamily protein	LOC_Os04g38530.1	aldose 1-epimerase, putative, expressed
RT1/D1W	5729	Pavir.J04097.1	30315225	Pavir.J04097.1.p|PACid:30315225	0.233	1.17527632841977	0.1502	4	Secondary metabolism	secondary metabolism.isoprenoids.mevalonate pathway.isopentenyl pyrophosphate:dimethyllallyl pyrophosphate isomerase	AT5G16440.1	isopentenyl diphosphate isomerase 1	LOC_Os05g34180.1	hydrolase, NUDIX family, domain containing protein, expressed
RT1/D1W	5751	Pavir.Ba03487.1	30292731	Pavir.Ba03487.1.p|PACid:30292731	0.5508	1.46489778258084	<.0001	7	Unclassified	not assigned.unknown	AT5G49830.1	exocyst complex component 84B	LOC_Os07g10110.1	expressed protein
RT1/D1W	5756	Pavir.Ga01767.1	30303102	Pavir.Ga01767.1.p|PACid:30303102	0.53781	1.45176707254526	<.0001	3	Unclassified	not assigned.no ontology	AT1G22930.1	T-complex protein 11	LOC_Os04g35840.1	T-complex protein 11, putative, expressed
RT1/D1W	5774	Pavir.Ea03201.1	30229441	Pavir.Ea03201.1.p|PACid:30229441	1.9877	3.96604212192543	<.0001	7	Unclassified	not assigned.unknown	AT2G31985.1	Protein of unknown function (DUF1264)	LOC_Os05g49440.2	DUF1264 domain containing protein, putative, expressed
RT1/D1W	5799	Pavir.Hb01949.1	30266197	Pavir.Hb01949.1.p|PACid:30266197	0.3865	1.30721822270785	0.0565	3	Unclassified	not assigned.no ontology	AT2G26460.1	RED family protein	LOC_Os11g04950.1	splicing factor, putative, expressed
RT1/D1W	5802	Pavir.Ia00766.1	30210271	Pavir.Ia00766.1.p|PACid:30210271	0.4684	1.3835741840544	0.0004	4	Regulation of transcription	RNA.regulation of transcription.Silencing Group	AT1G03150.1	Acyl-CoA N-acyltransferases (NAT) superfamily protein	LOC_Os03g49230.1	acetyltransferase, GNAT family, putative, expressed
RT1/D1W	5824	Pavir.J18947.1	30220429	Pavir.J18947.1.p|PACid:30220429	-0.16782	0.890186791807844	0.0537	2	RNA processing	RNA.processing.splicing	AT1G27650.1	U2 snRNP auxiliary factor small subunit, putative	LOC_Os05g48960.1	splicing factor U2AF, putative, expressed
RT1/D1W	5830	Pavir.Bb03074.1	30301375	Pavir.Bb03074.1.p|PACid:30301375	0.22361	1.16765170369543	0.0187	4	Phyto-hormone metabolism	hormone metabolism.abscisic acid.signal transduction	AT2G30470.1	high-level expression of sugar-inducible gene 2	LOC_Os07g37610.1	B3 DNA binding domain containing protein, putative, expressed
RT1/D1W	5900	Pavir.J37812.1	30283341	Pavir.J37812.1.p|PACid:30283341	0.7696	1.704797047897	0.0006	2	Unclassified	not assigned.unknown	AT5G11390.1	WPP domain-interacting protein 1	LOC_Os05g15140.1	expressed protein
RT1/D1W	5916	Pavir.Db01973.1	30262252	Pavir.Db01973.1.p|PACid:30262252	0.2673	1.20355327184713	0.1102	3	protein synthesis / Signaling regulation	protein.synthesis.ribosome biogenesis.export from nucleus / signalling.G-proteins	AT1G50920.1	Nucleolar GTP-binding protein	LOC_Os06g09570.1	nucleolar GTP-binding protein 1, putative, expressed
RT1/D1W	5920	Pavir.Aa03054.1	30251470	Pavir.Aa03054.1.p|PACid:30251470	0.8414	1.79178806045537	<.0001	3	Transport	transport.misc	AT1G80300.1	nucleotide transporter 1	LOC_Os02g11740.1	plastidic ATP/ADP-transporter, putative, expressed
RT1/D1W	5923	Pavir.Cb01412.1	30268395	Pavir.Cb01412.1.p|PACid:30268395	0.9055	1.87319358180923	0.0001	3	Signaling regulation	signalling.calcium	AT1G08860.1	Calcium-dependent phospholipid-binding Copine family protein	LOC_Os05g30970.1	copine, putative, expressed
RT1/D1W	5937	Pavir.Ib01485.1	30238258	Pavir.Ib01485.1.p|PACid:30238258	-0.02167	0.985091745603658	0.9395	4	Unclassified	not assigned.unknown	N	N	LOC_Os03g20330.1	VQ domain containing protein, putative, expressed
RT1/D1W	5964	Pavir.J29322.1	30208440	Pavir.J29322.1.p|PACid:30208440	0.29869	1.2300270135285	<.0001	8	Protein degradation	protein.degradation.subtilases	AT4G30020.1	PA-domain containing subtilase family protein	LOC_Os06g48650.1	OsSub52 - Putative Subtilisin homologue, expressed
RT1/D1W	5990	Pavir.Ca01526.1	30206088	Pavir.Ca01526.1.p|PACid:30206088	0.4327	1.34975728180215	0.0104	2	Abiotic/biotic stress	stress.abiotic.unspecified	AT2G34700.1	Pollen Ole e 1 allergen and extensin family protein	LOC_Os05g45480.1	POEI45 - Pollen Ole e I allergen and extensin family protein precursor, expressed
RT1/D1W	5998	Pavir.Eb01057.1	30311901	Pavir.Eb01057.1.p|PACid:30311901	0.4623	1.37773650885101	0.0093	4	Development	development.unspecified	AT5G17260.1	NAC domain containing protein 86	LOC_Os01g15640.1	no apical meristem protein, putative, expressed
RT1/D1W	6092	Pavir.Cb00904.1	30269510	Pavir.Cb00904.1.p|PACid:30269510	0.37108	1.2933206468239	0.0005	3	Amino acid metabolism	amino acid metabolism.synthesis.aromatic aa.chorismate.dehydroquinate/shikimate dehydrogenase	AT3G06350.1	dehydroquinate dehydratase, putative / shikimate dehydrogenase, putative	LOC_Os12g34874.1	bifunctional 3-dehydroquinate dehydratase/shikimate dehydrogenase,chloroplast precursor, putative, expressed
RT1/D1W	6109	Pavir.Ia04706.1	30209904	Pavir.Ia04706.1.p|PACid:30209904	-0.7372	0.599902521273596	<.0001	3	Regulation of transcription	RNA.regulation of transcription.bZIP transcription factor family	AT1G06850.1	basic leucine-zipper 52	LOC_Os03g21800.1	bZIP transcription factor family protein, putative, expressed
RT1/D1W	6159	Pavir.Fa00716.1	30186698	Pavir.Fa00716.1.p|PACid:30186698	0.7477	1.67911378768634	<.0001	4	TCA cycle	TCA / org transformation.carbonic anhydrases	AT1G08080.1	alpha carbonic anhydrase 7	LOC_Os08g36630.1	bifunctional monodehydroascorbate reductase and carbonic anhydrasenectarin-3 precursor, putative, expressed
RT1/D1W	6165	Pavir.Da01916.1	30191630	Pavir.Da01916.1.p|PACid:30191630	1.2693	2.41044581599479	<.0001	4	Protein degradation	protein.degradation.serine protease	AT2G38900.1	Serine protease inhibitor, potato inhibitor I-type family protein	LOC_Os01g42860.1	inhibitor I family protein, putative, expressed
RT1/D1W	6174	Pavir.Da00636.1	30192739	Pavir.Da00636.1.p|PACid:30192739	-0.4696	0.722164796603579	0.0006	5	Unclassified	not assigned.no ontology	AT3G62160.1	HXXXD-type acyl-transferase family protein	LOC_Os06g39390.1	transferase family protein, putative, expressed
RT1/D1W	6176	Pavir.Bb02450.1	30300709	Pavir.Bb02450.1.p|PACid:30300709	1.1739	2.25620788107974	<.0001	3	Regulation of transcription	RNA.regulation of transcription.CCAAT box binding factor family, HAP5	AT1G08970.1	nuclear factor Y, subunit C9	LOC_Os09g30310.1	core histone H2A/H2B/H3/H4, putative, expressed
RT1/D1W	6181	Pavir.J00698.1	30207424	Pavir.J00698.1.p|PACid:30207424	1.2665	2.40577213041512	<.0001	3	Abiotic/biotic stress	stress.biotic.PR-proteins	AT5G24090.1	chitinase A	LOC_Os01g64110.1	glycosyl hydrolase, putative, expressed
RT1/D1W	6196	Pavir.J26157.1	30288245	Pavir.J26157.1.p|PACid:30288245	0.2026	1.15077038579303	0.2339	2	Unclassified	not assigned.unknown	N	N	LOC_Os10g41030.1	agenet domain containing protein, putative, expressed
RT1/D1W	6199	Pavir.Ba03566.1	30293539	Pavir.Ba03566.1.p|PACid:30293539	0.4867	1.40123603994027	0.0021	3	Unclassified	not assigned.unknown	AT3G54970.1	D-aminoacid aminotransferase-like PLP-dependent enzymes superfamily protein	LOC_Os02g15360.1	expressed protein
RT1/D1W	6206	Pavir.J04157.1	30220859	Pavir.J04157.1.p|PACid:30220859	-0.6826	0.623041427603146	0.0015	2	Regulation of transcription	RNA.regulation of transcription.B3 transcription factor family	AT5G58280.1	AP2/B3-like transcriptional factor family protein	LOC_Os05g40280.1	B3 DNA binding domain containing protein, expressed
RT1/D1W	6263	Pavir.Bb02511.1	30299517	Pavir.Bb02511.1.p|PACid:30299517	0.8556	1.80951115318697	<.0001	3	Major CHO metabolism	major CHO metabolism.degradation.starch.D enzyme	AT5G64860.1	disproportionating enzyme	LOC_Os07g43390.1	4-alpha-glucanotransferase, chloroplast precursor, putative, expressed
RT1/D1W	6267	Pavir.J05289.1	30282217	Pavir.J05289.1.p|PACid:30282217	0.45562	1.37137202720672	<.0001	3	Protein modification	protein.postranslational modification	AT3G05580.1	Calcineurin-like metallo-phosphoesterase superfamily protein	LOC_Os01g24750.1	Ser/Thr protein phosphatase family protein, putative, expressed
RT1/D1W	6299	Pavir.J11495.1	30282746	Pavir.J11495.1.p|PACid:30282746	0.3845	1.30540728899058	0.0195	5	Development	development.unspecified	AT2G17250.1	CCAAT-binding factor	LOC_Os04g49580.1	nucleolar complex protein, putative, expressed
RT1/D1W	6303	Pavir.Eb00997.1	30309829	Pavir.Eb00997.1.p|PACid:30309829	0.5304	1.44432959320716	<.0001	4	DNA synthesis	DNA.synthesis/chromatin structure.retrotransposon/transposase.hat-like transposase	AT3G42170.1	BED zinc finger ;hAT family dimerisation domain	LOC_Os09g21430.1	ZOS9-05 - C2H2 zinc finger protein, expressed
RT1/D1W	6314	Pavir.Bb03474.1	30299067	Pavir.Bb03474.1.p|PACid:30299067	0.4009	1.32033131944999	0.0203	3	Functional enzyme	misc.peroxidases	AT2G41480.1	Peroxidase superfamily protein	LOC_Os07g44499.1	peroxidase, putative, expressed
RT1/D1W	6325	Pavir.Ga00485.1	30303639	Pavir.Ga00485.1.p|PACid:30303639	0.2488	1.18821837159591	0.2092	3	Phyto-hormone metabolism	hormone metabolism.ethylene.signal transduction	AT1G50640.1	ethylene responsive element binding factor 3	LOC_Os04g52090.1	AP2 domain containing protein, expressed
RT1/D1W	6347	Pavir.Db01492.1	30262989	Pavir.Db01492.1.p|PACid:30262989	0.5099	1.42395149138013	0.0026	3	Functional enzyme	misc.cytochrome P450	AT1G34540.1	cytochrome P450, family 94, subfamily D, polypeptide 1	LOC_Os01g58960.1	cytochrome P450, putative, expressed
RT1/D1W	6356	Pavir.Bb03437.1	30298152	Pavir.Bb03437.1.p|PACid:30298152	0.46421	1.37956171746883	<.0001	3	Protein synthesis	protein.synthesis.ribosome biogenesis.Pre-rRNA processing and modifications.DExD-box helicases	AT1G16280.1	RNA helicase 36	N	N
RT1/D1W	6362	Pavir.Ab02689.1	30232043	Pavir.Ab02689.1.p|PACid:30232043	0.29438	1.22635783517693	0.003	4			N	N	N	N
RT1/D1W	6378	Pavir.Gb00625.1	30221922	Pavir.Gb00625.1.p|PACid:30221922	0.3005	1.23157116943133	0.0474	2	Regulation of transcription	RNA.regulation of transcription.unclassified	AT1G05055.1	general transcription factor II H2	LOC_Os04g42990.1	suppressor of stem-loop protein 1, putative, expressed
RT1/D1W	6398	Pavir.J37384.1	30217042	Pavir.J37384.1.p|PACid:30217042	0.15133	1.11059283999462	0.0246	7	Unclassified	not assigned.unknown	AT2G26570.1	Plant protein of unknown function (DUF827)	LOC_Os07g42700.2	paramyosin, putative, expressed
RT1/D1W	6402	Pavir.Ia00513.1	30214085	Pavir.Ia00513.1.p|PACid:30214085	-0.7102	0.611235397753843	0.0005	2	protein synthesis / Signaling regulation	protein.synthesis.ribosome biogenesis.export from nucleus / signalling.G-proteins	AT3G07050.1	GTP-binding family protein	LOC_Os01g27730.1	GTPase of unknown function domain containing protein, putative, expressed
RT1/D1W	6405	Pavir.Ha00271.1	30316408	Pavir.Ha00271.1.p|PACid:30316408	0.2436	1.18394330755687	0.1667	2	Protein degradation	protein.degradation.AAA type	AT1G02890.1	AAA-type ATPase family protein	LOC_Os11g43970.1	AAA-type ATPase family protein, putative, expressed
RT1/D1W	6407	Pavir.J30617.1	30201299	Pavir.J30617.1.p|PACid:30201299	0.1092	1.07862995119222	0.5847	2	Transport	transport.sugars	AT1G21070.1	Nucleotide-sugar transporter family protein	LOC_Os07g39280.1	transporter-related, putative, expressed
RT1/D1W	6426	Pavir.J14450.1	30283258	Pavir.J14450.1.p|PACid:30283258	0.3468	1.27173669438199	0.0368	3	Protein degradation	protein.degradation	AT4G17510.1	ubiquitin C-terminal hydrolase 3	LOC_Os04g46190.1	ubiquitin carboxyl-terminal hydrolase, family 1, putative, expressed
RT1/D1W	6449	Pavir.J23416.1	30221086	Pavir.J23416.1.p|PACid:30221086	0.6217	1.53868722587783	0.018	2	Redox balance	redox.thioredoxin	AT1G53300.1	tetratricopetide-repeat thioredoxin-like 1	LOC_Os01g42960.1	TTL1, putative, expressed
RT1/D1W	6451	Pavir.J08501.1	30190180	Pavir.J08501.1.p|PACid:30190180	0.48813	1.40262563432865	<.0001	4	Signaling regulation	signalling.light	AT2G47590.1	photolyase/blue-light receptor 2	LOC_Os03g22330.1	blue-light photoreceptor PHR2, putative, expressed
RT1/D1W	6452	Pavir.Ba02009.1	30292388	Pavir.Ba02009.1.p|PACid:30292388	0.07347	1.05224452272386	0.5082	2			AT3G48690.1	alpha/beta-Hydrolases superfamily protein	LOC_Os09g28640.1	gibberellin receptor GID1L2, putative, expressed
RT1/D1W	6453	Pavir.Ea04032.1	30231544	Pavir.Ea04032.1.p|PACid:30231544	0.234	1.17609125029096	0.412	2	Unclassified	not assigned.unknown	AT5G04080.1	N	LOC_Os01g72009.1	expressed protein
RT1/D1W	6459	Pavir.J19770.1	30284405	Pavir.J19770.1.p|PACid:30284405	0.7844	1.72237585446923	0.0003	2	Unclassified	not assigned.unknown	AT5G67610.1	Uncharacterized conserved protein (DUF2215)	LOC_Os03g31570.1	proline-rich family protein, putative, expressed
RT1/D1W	6464	Pavir.J02396.1	30315738	Pavir.J02396.1.p|PACid:30315738	0.4657	1.38098725005868	0.0015	3	Unclassified	not assigned.no ontology	AT2G25830.1	YebC-related	LOC_Os05g44350.1	conserved uncharacterized protein, putative, expressed
RT1/D1W	6471	Pavir.J35699.1	30256764	Pavir.J35699.1.p|PACid:30256764	0.26901	1.20498066725536	0.0018	4	Signaling regulation	signalling.light	AT5G48150.1	GRAS family transcription factor	LOC_Os07g36170.1	chitin-inducible gibberellin-responsive protein, putative, expressed
RT1/D1W	6486	Pavir.J07604.1	30246193	Pavir.J07604.1.p|PACid:30246193	0.7845	1.72249524460367	<.0001	2	Unclassified	not assigned.unknown	AT5G42150.1	Glutathione S-transferase family protein	LOC_Os04g17050.1	glutaredoxin family protein, expressed
RT1/D1W	6489	Pavir.J03314.1	30272755	Pavir.J03314.1.p|PACid:30272755	0.41394	1.33231941433306	0.0003	3	Signaling regulation	signalling.G-proteins	AT1G06060.1	LisH and RanBPM domains containing protein	LOC_Os01g56820.1	AGAP000951-PA, putative, expressed
RT1/D1W	6504	Pavir.Ia01562.1	30209235	Pavir.Ia01562.1.p|PACid:30209235	1.2033	2.30265775709426	<.0001	4	Unclassified	not assigned.no ontology	AT5G53490.1	Tetratricopeptide repeat (TPR)-like superfamily protein	LOC_Os10g35810.1	thylakoid lumenal protein, putative, expressed
RT1/D1W	6506	Pavir.Ib04308.1	30239495	Pavir.Ib04308.1.p|PACid:30239495	0.1193	1.08620770338182	0.3987	3	Unclassified	not assigned.unknown	AT4G19970.1	N	LOC_Os03g63280.1	regulatory protein, putative, expressed
RT1/D1W	6513	Pavir.Gb00825.1	30222215	Pavir.Gb00825.1.p|PACid:30222215	0.7632	1.69725107606317	0.001	2	Regulation of transcription	RNA.regulation of transcription.putative transcription regulator	AT2G33620.1	AT hook motif DNA-binding family protein	LOC_Os04g49990.1	AT hook motif domain containing protein, expressed
RT1/D1W	6532	Pavir.Ga00038.1	30302750	Pavir.Ga00038.1.p|PACid:30302750	1.1358	2.19740378918959	<.0001	2	Secondary metabolism	secondary metabolism.flavonoids.anthocyanins.anthocyanidin reductase	AT1G61720.1	NAD(P)-binding Rossmann-fold superfamily protein	LOC_Os04g53850.1	leucoanthocyanidin reductase, putative, expressed
RT1/D1W	6533	Pavir.Fa01211.1	30186498	Pavir.Fa01211.1.p|PACid:30186498	0.3129	1.24220217590668	0.0976	2	Cell wall synthesis / modification	cell wall.modification	AT5G57550.1	xyloglucan endotransglucosylase/hydrolase 25	LOC_Os08g13920.1	glycosyl hydrolases family 16, putative, expressed
RT1/D1W	6547	Pavir.J12945.1	30256886	Pavir.J12945.1.p|PACid:30256886	0.53545	1.44939417362341	<.0001	2	Development	development.unspecified	AT5G14520.1	pescadillo-related	LOC_Os03g49210.1	BRCA1 C Terminus domain containing protein, expressed
RT1/D1W	6557	Pavir.Ea00939.1	30227151	Pavir.Ea00939.1.p|PACid:30227151	0.17608	1.12980986279481	0.0238	6	Carbohydrates metabolism	C1-metabolism.dihydropteridine diphosphokinase	AT4G30000.2	Dihydropterin pyrophosphokinase / Dihydropteroate synthase	LOC_Os07g42632.1	folic acid synthesis protein, putative, expressed
RT1/D1W	6579	Pavir.Ib01290.1	30242634	Pavir.Ib01290.1.p|PACid:30242634	-0.04108	0.971927091405187	0.7531	5			AT2G37510.1	RNA-binding (RRM/RBD/RNP motifs) family protein	LOC_Os03g17060.1	RNA recognition motif containing protein, putative, expressed
RT1/D1W	6582	Pavir.Eb00198.1	30309725	Pavir.Eb00198.1.p|PACid:30309725	0.42861	1.34593617666616	0.0008	2	RNA processing	RNA.processing.3' end processing.CstF77	AT1G17760.1	Tetratricopeptide repeat (TPR)-like superfamily protein	LOC_Os12g38380.1	tetratricopeptide repeat containing protein, putative, expressed
RT1/D1W	6626	Pavir.J01170.1	30302078	Pavir.J01170.1.p|PACid:30302078	0.5107	1.42474131671518	0.0009	2	Cell wall synthesis / modification	cell wall.degradation.pectate lyases and polygalacturonases	AT5G06860.1	polygalacturonase inhibiting protein 1	LOC_Os05g01370.1	polygalacturonase inhibitor precursor, putative, expressed
RT1/D1W	6633	Pavir.J16880.1	30283590	Pavir.J16880.1.p|PACid:30283590	1.0709	2.10074347053348	0.0008	2	Lipids metabolism	lipid metabolism.'exotics'(steroids, squalene etc)	AT1G13420.1	sulfotransferase 4B	LOC_Os07g41460.1	sulfotransferase domain containing protein, expressed
RT1/D1W	6642	Pavir.Ia03905.1	30215805	Pavir.Ia03905.1.p|PACid:30215805	-0.1241	0.917576278566009	0.2831	2	Phyto-hormone metabolism	hormone metabolism.abscisic acid.synthesis-degradation	AT5G42560.1	Abscisic acid-responsive (TB2/DP1, HVA22) family protein	LOC_Os03g14610.1	HVA22, putative, expressed
RT1/D1W	6656	Pavir.Ia01166.1	30211178	Pavir.Ia01166.1.p|PACid:30211178	-0.1452	0.90425401264778	0.3374	3	Regulation of transcription	RNA.regulation of transcription.MYB-related transcription factor family	AT1G49950.1	telomere repeat binding factor 1	LOC_Os12g41920.1	single myb histone, putative, expressed
RT1/D1W	6667	Pavir.Ea03880.1	30230701	Pavir.Ea03880.1.p|PACid:30230701	0.1589	1.11643557388351	0.1712	3	Functional enzyme	misc.UDP glucosyl and glucoronyl transferases	AT5G61840.1	Exostosin family protein	LOC_Os01g70180.1	exostosin family domain containing protein, expressed
RT1/D1W	6671	Pavir.Bb02235.1	30301310	Pavir.Bb02235.1.p|PACid:30301310	0.8035	1.74533019208588	0.0005	2	RNA synthesis	RNA.transcription	AT4G31720.1	TBP-associated factor II 15	LOC_Os09g26180.1	transcription initiation factor TFIID subunit 10, putative, expressed
RT1/D1W	6687	Pavir.Ea00572.1	30228766	Pavir.Ea00572.1.p|PACid:30228766	0.4867	1.40123603994027	0.0485	2	Unclassified	not assigned.unknown	AT1G19240.1	N	LOC_Os01g05140.1	expressed protein
RT1/D1W	6693	Pavir.Ca01365.1	30204994	Pavir.Ca01365.1.p|PACid:30204994	0.2289	1.17194104809581	0.1745	3	Functional enzyme	misc.beta 1,3 glucan hydrolases.glucan endo-1,3-beta-glucosidase	AT3G57260.1	beta-1,3-glucanase 2	LOC_Os05g41610.1	glycosyl hydrolases family 17, putative, expressed
RT1/D1W	6707	Pavir.J13724.1	30218544	Pavir.J13724.1.p|PACid:30218544	0.9235	1.89671116635902	0.0084	2	Unclassified	not assigned.unknown	AT4G15802.1	heat shock factor binding protein	LOC_Os06g16270.1	heat shock factor binding protein 2, putative, expressed
RT1/D1W	6709	Pavir.J28686.1	30277485	Pavir.J28686.1.p|PACid:30277485	0.1711	1.12591662602556	0.3684	2	Protein modification	protein.postranslational modification	AT1G32640.1	Basic helix-loop-helix (bHLH) DNA-binding family protein	LOC_Os10g42430.1	transcription factor MYC7E, putative, expressed
RT1/D1W	6722	Pavir.Ba02117.1	30291673	Pavir.Ba02117.1.p|PACid:30291673	-0.1265	0.916051110531799	0.4637	2	Unclassified	not assigned.unknown	AT1G74640.1	alpha/beta-Hydrolases superfamily protein	LOC_Os09g24710.1	alpha/beta hydrolase fold, putative, expressed
RT1/D1W	6741	Pavir.J02689.1	30189694	Pavir.J02689.1.p|PACid:30189694	-0.564	0.676424115525137	0.1063	2	Regulation of transcription	RNA.regulation of transcription.General Transcription	AT5G09380.1	RNA polymerase III RPC4	LOC_Os04g32350.1	RNA polymerase III RPC4 domain containing protein, expressed
RT1/D1W	6745	Pavir.Ea01844.1	30227795	Pavir.Ea01844.1.p|PACid:30227795	0.8624	1.81806023635486	<.0001	4	Signaling regulation	signalling.receptor kinases.leucine rich repeat III	AT2G01210.1	Leucine-rich repeat protein kinase family protein	LOC_Os01g33090.1	expressed protein
RT1/D1W	6749	Pavir.J27160.1	30216228	Pavir.J27160.1.p|PACid:30216228	0.8171	1.76186086691084	<.0001	4	Protein synthesis	protein.synthesis.ribosomal protein.eukaryotic.40S subunit.S7	AT1G48830.1	Ribosomal protein S7e family protein	LOC_Os05g27940.1	40S ribosomal protein S7, putative, expressed
RT1/D1W	6756	Pavir.Da01271.1	30194453	Pavir.Da01271.1.p|PACid:30194453	1.0495	2.06981238105434	<.0001	6	Development	development.unspecified	AT1G70670.1	Caleosin-related family protein	LOC_Os06g14370.1	caleosin related protein, putative, expressed
RT1/D1W	6763	Pavir.J13162.1	30190529	Pavir.J13162.1.p|PACid:30190529	0.5447	1.45871698103117	0.008	3	Signaling regulation	signalling.in sugar and nutrient physiology	AT4G08950.1	Phosphate-responsive 1 family protein	LOC_Os02g52010.1	phosphate-induced protein 1 conserved region domain containing protein, expressed
RT1/D1W	6771	Pavir.Fb01014.1	30279849	Pavir.Fb01014.1.p|PACid:30279849	0.3262	1.25370680906229	0.1458	2	Unclassified	not assigned.unknown	AT4G30240.1	Syntaxin/t-SNARE family protein	LOC_Os08g14640.1	syntaxin 6, N-terminal domain containing protein, expressed
RT1/D1W	6790	Pavir.Ab02782.1	30234464	Pavir.Ab02782.1.p|PACid:30234464	0.31707	1.24579786059228	0.0015	2	Cell wall synthesis / modification	cell wall.pectin esterases.acetyl esterase	AT4G19420.1	Pectinacetylesterase family protein	LOC_Os02g47400.1	pectinacetylesterase domain containing protein, expressed
RT1/D1W	6803	Pavir.J11378.1	30198861	Pavir.J11378.1.p|PACid:30198861	-0.0471	0.967879936243687	0.6873	5	Unclassified	not assigned.unknown	AT3G32940.1	RNA-binding KH domain-containing protein	N	N
RT1/D1W	6821	Pavir.J22437.1	30198542	Pavir.J22437.1.p|PACid:30198542	0.26774	1.20392039323259	0.0073	2	Amino acid metabolism	amino acid metabolism.synthesis.aromatic aa.tyrosine.prephenate dehydrogenase	AT1G15710.1	prephenate dehydrogenase family protein	LOC_Os06g49520.1	arogenate dehydrogenase 1, chloroplast precursor, putative, expressed
RT1/D1W	6826	Pavir.Ab01784.1	30232450	Pavir.Ab01784.1.p|PACid:30232450	-0.4014	0.75712320970757	0.009	2	Signaling regulation	signalling.calcium	AT5G39380.1	Plant calmodulin-binding protein-related	LOC_Os04g21710.1	expressed protein
RT1/D1W	6828	Pavir.Eb00938.1	30309734	Pavir.Eb00938.1.p|PACid:30309734	-0.03774	0.974179817722625	0.8238	3	RNA processing	RNA.processing.ribonucleases	AT1G75660.1	5\'-3\' exoribonuclease 3	LOC_Os01g65220.1	XRN 5\'-3\' exonuclease N-terminus domain containing protein, expressed
RT1/D1W	6836	Pavir.Hb01104.1	30266751	Pavir.Hb01104.1.p|PACid:30266751	-0.04189	0.971381556860763	0.501	2	Functional enzyme	misc.nitrilases, *nitrile lyases, berberine bridge enzymes, reticuline oxidases, troponine reductases	AT1G26390.1	FAD-binding Berberine family protein	LOC_Os11g30310.1	reticuline oxidase-like protein precursor, putative, expressed
RT1/D1W	6840	Pavir.J04354.1	30220027	Pavir.J04354.1.p|PACid:30220027	-0.1865	0.878734961801216	0.2043	4	Signaling regulation	signalling.calcium	AT3G43810.1	calmodulin 7	LOC_Os05g41200.1	OsCML9 - Calmodulin-related calcium sensor protein, expressed
RT1/D1W	6860	Pavir.Ba00623.2	30290810	Pavir.Ba00623.2.p|PACid:30290810	-0.343	0.788400174056278	0.0091	9	Protein synthesis	protein.synthesis.ribosomal protein.eukaryotic.60S subunit.L38	AT3G59540.1	Ribosomal L38e protein family	LOC_Os11g24610.1	60S ribosomal protein L38, putative, expressed
RT1/D1W	6868	Pavir.J35969.1	30197593	Pavir.J35969.1.p|PACid:30197593	-0.4711	0.72141433706637	0.2553	3	Functional enzyme	misc.short chain dehydrogenase/reductase (SDR)	AT3G03980.1	NAD(P)-binding Rossmann-fold superfamily protein	LOC_Os03g53690.1	oxidoreductase, short chain dehydrogenase/reductase family domain containing protein, expressed
RT1/D1W	6887	Pavir.Ab02883.1	30235105	Pavir.Ab02883.1.p|PACid:30235105	0.6417	1.56016649911065	<.0001	5	Cell wall synthesis / modification	cell wall.modification	AT1G26770.1	expansin A10	LOC_Os02g51040.1	expansin precursor, putative, expressed
RT1/D1W	6899	Pavir.Ib01555.2	30239540	Pavir.Ib01555.2.p|PACid:30239540	-0.4464	0.733871817334739	0.0002	6	Unclassified	not assigned.unknown	AT2G38580.1	Mitochondrial ATP synthase D chain-related protein	LOC_Os03g21520.1	expressed protein
RT1/D1W	6902	Pavir.J10890.1	30283784	Pavir.J10890.1.p|PACid:30283784	-0.2434	0.844752136915626	0.0627	4			AT2G44710.1	RNA-binding (RRM/RBD/RNP motifs) family protein	LOC_Os07g27110.1	RNA recognition motif containing protein, expressed
RT1/D1W	6905	Pavir.J04334.1	30316011	Pavir.J04334.1.p|PACid:30316011	-0.03631	0.975145903927516	0.7183	3	Protein targeting & vesicle tansport	protein.targeting.secretory pathway.unspecified	AT1G52600.1	Peptidase S24/S26A/S26B/S26C family protein	LOC_Os06g16260.1	OsSigP5 - Putative Type I Signal Peptidase homologue; employs a putative Ser/His catalytic dyad, expressed
RT1/D1W	6918	Pavir.Ea03531.1	30227038	Pavir.Ea03531.1.p|PACid:30227038	0.22345	1.16752221415818	0.0347	3	Unclassified	not assigned.unknown	AT3G27340.1	N	LOC_Os02g10430.1	1-5-phosphoribosyl-5-5-phosphoribosylaminomethylideneaminoimidazole-4-carboxamide isomerase, chloroplast precursor, putative, expressed
RT1/D1W	6921	Pavir.J16246.1	30199737	Pavir.J16246.1.p|PACid:30199737	-0.19707	0.872320379495114	0.0513	3	Functional enzyme	misc.nitrilases, *nitrile lyases, berberine bridge enzymes, reticuline oxidases, troponine reductases	AT1G30760.1	FAD-binding Berberine family protein	LOC_Os06g35560.1	reticuline oxidase-like protein precursor, putative, expressed
RT1/D1W	6922	Pavir.J31031.1	30244250	Pavir.J31031.1.p|PACid:30244250	0.2467	1.18649004833285	0.0323	3	RNA processing	RNA.processing.splicing	AT1G55310.3	SC35-like splicing factor 33	LOC_Os07g43950.1	RNA recognition motif containing protein, putative, expressed
RT1/D1W	6930	Pavir.Aa03128.1	30253055	Pavir.Aa03128.1.p|PACid:30253055	0.08608	1.06148206838208	0.4732	5	Unclassified	not assigned.unknown	AT4G37090.1	N	LOC_Os02g09380.1	expressed protein
RT1/D1W	6938	Pavir.J04725.1	30219806	Pavir.J04725.1.p|PACid:30219806	0.01221	1.00849924227642	0.9579	2	Unclassified	not assigned.no ontology	AT3G27090.1	DCD (Development and Cell Death) domain protein	LOC_Os01g36950.1	N-rich protein, putative, expressed
RT1/D1W	6949	Pavir.Db01839.1	30261826	Pavir.Db01839.1.p|PACid:30261826	0.41936	1.33733416275847	<.0001	5	Abiotic/biotic stress	stress.abiotic.heat	AT1G28210.2	DNAJ heat shock family protein	LOC_Os12g07060.1	chaperone protein dnaJ, putative, expressed
RT1/D1W	6952	Pavir.Fa00881.1	30186387	Pavir.Fa00881.1.p|PACid:30186387	0.08812	1.06298408721228	0.2581	2	Unclassified	not assigned.unknown	AT3G29010.1	Biotin/lipoate A/B protein ligase family	LOC_Os08g33810.1	lipoate protein ligase, putative, expressed
RT1/D1W	6956	Pavir.J29139.1	30201117	Pavir.J29139.1.p|PACid:30201117	0.6778	1.59969847599552	0.0031	4	Nucleotide metabolism	nucleotide metabolism.degradation	AT2G38280.1	AMP deaminase, putative / myoadenylate deaminase, putative	LOC_Os07g49270.1	AMP deaminase, putative, expressed
RT1/D1W	6961	Pavir.J04821.1	30276336	Pavir.J04821.1.p|PACid:30276336	1.8413	3.58332773495079	<.0001	2	Unclassified	not assigned.unknown	N	N	LOC_Os05g05930.1	peripheral-type benzodiazepine receptor, putative, expressed
RT1/D1W	6973	Pavir.Ab02972.1	30232130	Pavir.Ab02972.1.p|PACid:30232130	0.4429	1.35933401678707	0.0008	3	Functional enzyme	misc.GDSL-motif lipase	AT5G55050.1	GDSL-like Lipase/Acylhydrolase superfamily protein	LOC_Os02g50690.1	GDSL-like lipase/acylhydrolase, putative, expressed
RT1/D1W	6983	Pavir.J12267.1	30199879	Pavir.J12267.1.p|PACid:30199879	0.5265	1.44043044716891	0.0002	3	Unclassified	not assigned.no ontology	AT1G19190.1	alpha/beta-Hydrolases superfamily protein	LOC_Os09g28750.1	gibberellin receptor GID1L2, putative, expressed
RT1/D1W	6989	Pavir.Ea02626.1	30225983	Pavir.Ea02626.1.p|PACid:30225983	1.8602	3.63057989162693	<.0001	5	Development	development.unspecified	AT5G10830.1	S-adenosyl-L-methionine-dependent methyltransferases superfamily protein	LOC_Os01g51870.1	methyltransferase, putative, expressed
RT1/D1W	6996	Pavir.J36440.1	30207376	Pavir.J36440.1.p|PACid:30207376	0.68993	1.61320524333868	<.0001	2	Unclassified	not assigned.unknown	AT3G59840.1	N	LOC_Os05g42110.1	allyl alcohol dehydrogenase, putative, expressed
RT1/D1W	7000	Pavir.J01161.1	30306247	Pavir.J01161.1.p|PACid:30306247	0.5059	1.42000892761366	0.0025	3	Regulation of transcription	RNA.regulation of transcription.HSF,Heat-shock transcription factor family	AT3G22830.1	heat shock transcription factor A6B	LOC_Os03g58160.1	heat stress transcription factor, putative, expressed
RT1/D1W	7032	Pavir.J03922.1	30201464	Pavir.J03922.1.p|PACid:30201464	-0.406	0.75471298426028	0.011	2	Unclassified	not assigned.unknown	N	N	LOC_Os02g38180.1	expressed protein
RT1/D1W	7039	Pavir.Aa02956.1	30250904	Pavir.Aa02956.1.p|PACid:30250904	0.3652	1.28806018018981	0.0041	3	Unclassified	not assigned.unknown	AT4G32460.1	Protein of unknown function, DUF642	LOC_Os02g11040.1	expressed protein
RT1/D1W	7062	Pavir.Ba00375.1	30293463	Pavir.Ba00375.1.p|PACid:30293463	0.07248	1.05152270369302	0.555	4	Protein synthesis	protein.synthesis.ribosomal protein.prokaryotic.unknown organellar.50S subunit.L12	AT4G37660.1	Ribosomal protein L12/ ATP-dependent Clp protease adaptor protein ClpS family protein	LOC_Os07g43310.1	ribosomal protein L7/L12 C-terminal domain containing protein, expressed
RT1/D1W	7066	Pavir.J04666.1	30218126	Pavir.J04666.1.p|PACid:30218126	-0.0523	0.964397622884072	0.5782	6	Development	development.unspecified	AT5G08790.1	NAC (No Apical Meristem) domain transcriptional regulator superfamily protein	LOC_Os03g60080.1	NAC domain-containing protein 67, putative, expressed
RT1/D1W	7068	Pavir.Da00064.1	30192778	Pavir.Da00064.1.p|PACid:30192778	0.20455	1.15232686128535	0.0168	3	RNA processing	RNA.processing.3' end processing.CPSF30	AT1G30460.1	cleavage and polyadenylation specificity factor 30	LOC_Os06g46400.1	ATCPSF30/CPSF30, putative, expressed
RT1/D1W	7072	Pavir.Cb01421.1	30269039	Pavir.Cb01421.1.p|PACid:30269039	-0.4346	0.739898869714292	0.0421	5	Signaling regulation	signalling.calcium	AT1G24620.1	EF hand calcium-binding protein family	LOC_Os05g31620.1	OsCML15 - Calmodulin-related calcium sensor protein, expressed
RT1/D1W	7089	Pavir.Ba00043.1	30292957	Pavir.Ba00043.1.p|PACid:30292957	0.2286	1.17169737514189	0.2393	2	Nucleotide metabolism	nucleotide metabolism.phosphotransfer and pyrophosphatases.thymidylate kinase	AT5G59440.3	P-loop containing nucleoside triphosphate hydrolases superfamily protein	LOC_Os07g44630.1	thymidylate kinase, putative, expressed
RT1/D1W	7092	Pavir.Aa02399.3	30249005	Pavir.Aa02399.3.p|PACid:30249005	0.4567	1.37239901922782	0.0003	4	Unclassified	not assigned.no ontology	AT1G28410.1	N	LOC_Os02g20270.1	expressed protein
RT1/D1W	7093	Pavir.Gb00484.1	30222752	Pavir.Gb00484.1.p|PACid:30222752	0.5247	1.43863439329276	0.0012	2	Signaling regulation	signalling.receptor kinases.leucine rich repeat VIII.VIII-2	AT1G16670.1	Protein kinase superfamily protein	LOC_Os04g52840.1	tyrosine protein kinase domain containing protein, putative, expressed
RT1/D1W	7106	Pavir.Ab02385.1	30232578	Pavir.Ab02385.1.p|PACid:30232578	1.30999	2.4793982139396	<.0001	5	Development	development.unspecified	N	N	LOC_Os02g42450.1	RIPER1 - Ripening-related family protein precursor, expressed
RT1/D1W	7109	Pavir.J36934.1	30275773	Pavir.J36934.1.p|PACid:30275773	0.8011	1.74242915608452	<.0001	6	Protein degradation	protein.degradation.ubiquitin.proteasom	AT5G09900.1	26S proteasome regulatory subunit, putative (RPN5)	LOC_Os03g63430.1	proteasome subunit, putative, expressed
RT1/D1W	7112	Pavir.J38094.1	30218793	Pavir.J38094.1.p|PACid:30218793	0.08355	1.05962221847674	0.7519	2	Functional enzyme	misc.myrosinases-lectin-jacalin	AT1G19715.3	Mannose-binding lectin superfamily protein	LOC_Os11g39530.1	jacalin-like lectin domain containing protein, expressed
RT1/D1W	7117	Pavir.Hb00786.1	30264920	Pavir.Hb00786.1.p|PACid:30264920	-0.09801	0.934320870641963	0.5158	2	Protein degradation	protein.degradation.subtilases	AT4G10550.3	Subtilase family protein	LOC_Os02g17090.1	OsSub17 - Putative Subtilisin homologue, expressed
RT1/D1W	7145	Pavir.J00959.1	30256608	Pavir.J00959.1.p|PACid:30256608	0.67045	1.59156932640068	<.0001	3	Unclassified	not assigned.unknown	AT1G05970.2	RNA-binding (RRM/RBD/RNP motifs) family protein	LOC_Os09g02400.1	RNA-binding region RNP-1, putative, expressed
RT1/D1W	7151	Pavir.Fa01112.1	30185969	Pavir.Fa01112.1.p|PACid:30185969	0.545	1.45902034424018	0.0045	2			AT5G19980.1	golgi nucleotide sugar transporter 4	LOC_Os08g10350.1	integral membrane family protein, putative, expressed
RT1/D1W	7160	Pavir.Bb01314.1	30299373	Pavir.Bb01314.1.p|PACid:30299373	0.4438	1.36018227803306	0.0047	5	Unclassified	not assigned.no ontology	AT3G13200.1	Cwf15 / Cwc15 cell cycle control family protein	LOC_Os06g01700.1	CWC15 homolog A, putative, expressed
RT1/D1W	7170	Pavir.J35616.1	30217746	Pavir.J35616.1.p|PACid:30217746	0.1326	1.09626759653012	0.4043	5	DNA synthesis	DNA.synthesis/chromatin structure	AT3G50360.1	centrin2	LOC_Os10g25010.1	OsCML8 - Calmodulin-related calcium sensor protein, expressed
RT1/D1W	7174	Pavir.Cb00221.1	30270242	Pavir.Cb00221.1.p|PACid:30270242	0.12384	1.08963126153818	0.0399	5	Unclassified	not assigned.no ontology	AT1G17070.1	GC-rich sequence DNA-binding factor-like protein with Tuftelin interacting domain	LOC_Os12g42140.1	G-patch domain containing protein, putative, expressed
RT1/D1W	7175	Pavir.Bb01720.1	30298754	Pavir.Bb01720.1.p|PACid:30298754	0.318	1.2466011942751	0.1388	2	Unclassified	not assigned.unknown	AT1G24560.1	N	LOC_Os09g39200.1	expressed protein
RT1/D1W	7179	Pavir.Hb01787.1	30265251	Pavir.Hb01787.1.p|PACid:30265251	0.3025	1.23327967357003	0.116	2	Protein targeting & vesicle tansport	cell.vesicle transport	AT1G28490.1	syntaxin of plants 61	LOC_Os11g06740.1	syntaxin 6, putative, expressed
RT1/D1W	7180	Pavir.Ib04122.1	30242006	Pavir.Ib04122.1.p|PACid:30242006	0.8713	1.82931053388382	0.001	2	RNA synthesis	RNA.transcription	AT4G21710.1	DNA-directed RNA polymerase family protein	LOC_Os03g44484.2	DNA-directed RNA polymerase II subunit RPB2, putative, expressed
RT1/D1W	7198	Pavir.Aa01673.1	30251377	Pavir.Aa01673.1.p|PACid:30251377	0.35431	1.27837402511179	0.0003	3	Tetrapyrrole synthesis	tetrapyrrole synthesis.ferrochelatase	AT2G30390.1	ferrochelatase 2	LOC_Os05g29760.1	ferrochelatase-2, chloroplast precursor, putative, expressed
RT1/D1W	7227	Pavir.Ia04617.1	30212997	Pavir.Ia04617.1.p|PACid:30212997	0.3941	1.31412271203785	0.02	2	Mitochondrial electron transport / ATP synthesis	mitochondrial electron transport / ATP synthesis.cytochrome c oxidase	AT3G17910.1	Surfeit locus 1 cytochrome c oxidase biogenesis protein	LOC_Os03g10360.1	SURF1, putative, expressed
RT1/D1W	7233	Pavir.Ha00996.1	30317093	Pavir.Ha00996.1.p|PACid:30317093	0.4216	1.33941218702869	0.0011	3			AT5G23530.1	carboxyesterase 18	LOC_Os11g13670.1	gibberellin receptor GID1L2, putative, expressed
RT1/D1W	7240	Pavir.Bb00826.1	30301666	Pavir.Bb00826.1.p|PACid:30301666	-1.1517	0.450094549696645	<.0001	4			N	N	N	N
RT1/D1W	7245	Pavir.J13773.1	30256051	Pavir.J13773.1.p|PACid:30256051	0.02327	1.01626031805057	0.8229	4	Cell division & Cell cycle	cell.division	AT3G54180.1	cyclin-dependent kinase B1;1	LOC_Os01g67160.1	cyclin-dependent kinase B1-1, putative, expressed
RT1/D1W	7256	Pavir.J01165.1	30196625	Pavir.J01165.1.p|PACid:30196625	0.02611	1.01826283546635	0.7711	2	Unclassified	not assigned.no ontology	AT5G43560.1	TRAF-like superfamily protein	LOC_Os05g43280.1	MATH domain containing protein, expressed
RT1/D1W	7271	Pavir.Ab01452.1	30235583	Pavir.Ab01452.1.p|PACid:30235583	-0.1405	0.907204687641498	0.2354	3	Abiotic/biotic stress	stress.abiotic.unspecified	AT5G54855.1	Pollen Ole e 1 allergen and extensin family protein	LOC_Os02g21280.1	POEI30 - Pollen Ole e I allergen and extensin family protein precursor, expressed
RT1/D1W	7284	Pavir.Ib03706.1	30237986	Pavir.Ib03706.1.p|PACid:30237986	0.4076	1.32647731200409	0.0073	4	Unclassified	not assigned.unknown	AT3G60680.1	Plant protein of unknown function (DUF641)	LOC_Os10g36400.1	GIL1, putative, expressed
RT1/D1W	7334	Pavir.Bb01327.1	30298078	Pavir.Bb01327.1.p|PACid:30298078	0.2034	1.1514086853496	0.0298	3	Protein targeting & vesicle tansport	protein.targeting.secretory pathway.unspecified	AT5G47730.1	Sec14p-like phosphatidylinositol transfer family protein	LOC_Os09g08390.1	CRAL/TRIO domain containing protein, expressed
RT1/D1W	7354	Pavir.Ba01417.1	30289352	Pavir.Ba01417.1.p|PACid:30289352	0.5669	1.48133711599713	<.0001	3	Unclassified	not assigned.unknown	AT5G10840.1	Endomembrane protein 70 protein family	LOC_Os09g38530.1	transmembrane 9 superfamily member, putative, expressed
RT1/D1W	7355	Pavir.Fa01260.1	30186119	Pavir.Fa01260.1.p|PACid:30186119	0.06555	1.04648381577429	0.766	2	Regulation of transcription	RNA.regulation of transcription.G2-like transcription factor family, GARP	AT1G79430.2	Homeodomain-like superfamily protein	LOC_Os09g12750.1	Myb-like DNA-binding domain containing protein, putative, expressed
RT1/D1W	7368	Pavir.Ib02545.1	30238813	Pavir.Ib02545.1.p|PACid:30238813	1.7889	3.45551322337504	<.0001	2	Functional enzyme	misc.glutathione S transferases	AT1G10370.1	Glutathione S-transferase family protein	LOC_Os10g38140.1	glutathione S-transferase, putative, expressed
RT1/D1W	7382	Pavir.Ib01924.1	30239748	Pavir.Ib01924.1.p|PACid:30239748	0.95382	1.93699469134271	<.0001	6	Regulation of transcription	RNA.regulation of transcription.CCAAT box binding factor family, HAP3	AT4G14540.1	nuclear factor Y, subunit B3	LOC_Os03g29970.1	histone-like transcription factor and archaeal histone, putative, expressed
RT1/D1W	7391	Pavir.J20627.1	30185319	Pavir.J20627.1.p|PACid:30185319	0.16232	1.11908529457051	0.0693	3	Unclassified	not assigned.unknown	AT3G08600.1	Protein of unknown function (DUF1191)	LOC_Os12g02550.1	expressed protein
RT1/D1W	7393	Pavir.J35028.1	30217664	Pavir.J35028.1.p|PACid:30217664	0.1463	1.10672746667301	0.6648	2			AT2G43360.1	Radical SAM superfamily protein	LOC_Os08g42730.1	radical SAM enzyme, putative, expressed
RT1/D1W	7399	Pavir.Da00035.1	30193652	Pavir.Da00035.1.p|PACid:30193652	0.1559	1.11411642347709	0.1572	2	Abiotic/biotic stress	stress.abiotic.heat	AT1G11660.1	heat shock protein 70 (Hsp 70) family protein	LOC_Os06g46600.1	DnaK family protein, putative, expressed
RT1/D1W	7424	Pavir.Gb02451.1	30223651	Pavir.Gb02451.1.p|PACid:30223651	0.5686	1.48308367872351	0.0007	2	Cell division & Cell cycle	cell.division	AT1G66510.1	AAR2 protein family	LOC_Os04g04320.1	expressed protein
RT1/D1W	7437	Pavir.Fa00064.1	30187717	Pavir.Fa00064.1.p|PACid:30187717	0.1297	1.09406617294003	0.4124	3	Protein targeting & vesicle tansport	protein.targeting.mitochondria	AT5G43970.1	translocase of outer membrane 22-V	LOC_Os02g29400.1	expressed protein
RT1/D1W	7442	Pavir.Ib00304.1	30240070	Pavir.Ib00304.1.p|PACid:30240070	0.1427	1.10396925933934	0.3607	2	Secondary metabolism	secondary metabolism.phenylpropanoids.lignin biosynthesis.4CL	AT4G05160.1	AMP-dependent synthetase and ligase family protein	LOC_Os03g05780.1	4-coumarate--CoA ligase-like 7, putative, expressed
RT1/D1W	7447	Pavir.J36382.1	30257558	Pavir.J36382.1.p|PACid:30257558	0.4908	1.40522388130894	0.0001	3	Cell organization	cell.organisation	AT2G34730.1	myosin heavy chain-related	LOC_Os09g04810.1	myosin heavy chain-related, putative, expressed
RT1/D1W	7451	Pavir.J21899.1	30196039	Pavir.J21899.1.p|PACid:30196039	0.1302	1.09444541309511	0.3454	4	Unclassified	not assigned.unknown	AT1G20890.1	N	LOC_Os03g58930.1	expressed protein
RT1/D1W	7469	Pavir.Ca02166.1	30204493	Pavir.Ca02166.1.p|PACid:30204493	-0.1772	0.884417820488982	0.2788	2	Unclassified	not assigned.unknown	AT5G17510.1	N	LOC_Os12g27994.2	expressed protein
RT1/D1W	7484	Pavir.Db00687.1	30260170	Pavir.Db00687.1.p|PACid:30260170	0.25292	1.19161649549283	0.0183	2	Protein degradation	protein.degradation.ubiquitin.E3.RING	AT4G34100.2	RING/U-box superfamily protein	LOC_Os06g43210.1	zinc finger, C3HC4 type domain containing protein, expressed
RT1/D1W	7512	Pavir.Ba01041.1	30289119	Pavir.Ba01041.1.p|PACid:30289119	0.1539	1.11257300022825	0.4241	2	Regulation of transcription	RNA.regulation of transcription.unclassified	AT5G43100.1	Eukaryotic aspartyl protease family protein	LOC_Os07g40260.1	eukaryotic aspartyl protease domain containing protein, expressed
RT1/D1W	7524	Pavir.Ab00488.1	30234252	Pavir.Ab00488.1.p|PACid:30234252	0.26734	1.20358664189202	0.0018	3	Unclassified	not assigned.no ontology	AT3G22160.1	VQ motif-containing protein	LOC_Os02g07690.1	VQ domain containing protein, putative, expressed
RT1/D1W	7526	Pavir.Ca00359.1	30204748	Pavir.Ca00359.1.p|PACid:30204748	0.6467	1.56558300482851	0.0477	2	Functional enzyme	misc.myrosinases-lectin-jacalin	AT1G19715.1	Mannose-binding lectin superfamily protein	LOC_Os04g30040.2	jacalin-like lectin domain containing protein, expressed
RT1/D1W	7529	Pavir.J20425.1	30207728	Pavir.J20425.1.p|PACid:30207728	0.182	1.13445548493595	0.4196	2	Unclassified	not assigned.unknown	AT2G24960.1	N	LOC_Os04g38960.1	expressed protein
RT1/D1W	7544	Pavir.Fb01174.1	30280755	Pavir.Fb01174.1.p|PACid:30280755	0.3937	1.31375841036201	0.0119	2	Unclassified	not assigned.unknown	AT5G20090.1	Uncharacterised protein family (UPF0041)	LOC_Os09g20660.1	UPF0041 domain containing protein, putative, expressed
RT1/D1W	7548	Pavir.Ba00908.1	30293533	Pavir.Ba00908.1.p|PACid:30293533	-0.14922	0.901737859745125	0.0791	2	Protein modification	protein.postranslational modification	AT2G44680.1	casein kinase II beta subunit 4	LOC_Os07g31280.1	casein kinase II subunit beta-4, putative, expressed
RT1/D1W	7554	Pavir.Ba00690.1	30289270	Pavir.Ba00690.1.p|PACid:30289270	0.28408	1.21763353673121	0.0096	2	Signaling regulation	signalling.receptor kinases.S-locus glycoprotein like	AT4G21390.1	S-locus lectin protein kinase family protein	LOC_Os07g36590.1	serine/threonine-protein kinase receptor precursor, putative, expressed
RT1/D1W	7556	Pavir.Ia00943.1	30209078	Pavir.Ia00943.1.p|PACid:30209078	-0.4695	0.722214854987717	0.1523	3	Unclassified	not assigned.unknown	AT4G33640.1	N	LOC_Os03g48390.1	expressed protein
RT1/D1W	7567	Pavir.Ga01571.1	30303181	Pavir.Ga01571.1.p|PACid:30303181	0.2779	1.21242877699025	0.0889	3	Unclassified	not assigned.no ontology	AT5G50310.1	Galactose oxidase/kelch repeat superfamily protein	LOC_Os04g40740.1	kelch repeat protein, putative, expressed
RT1/D1W	7584	Pavir.J35462.1	30185284	Pavir.J35462.1.p|PACid:30185284	1.4987	2.8258796015211	<.0001	3	Unclassified	not assigned.unknown	AT1G28510.1	Optic atrophy 3 protein (OPA3)	LOC_Os02g20844.1	expressed protein
RT1/D1W	7601	Pavir.Ia00684.1	30214291	Pavir.Ia00684.1.p|PACid:30214291	-0.1616	0.89403300657983	0.2407	2	Abiotic/biotic stress	stress.abiotic.unspecified	AT1G01170.1	Protein of unknown function (DUF1138)	LOC_Os06g02470.1	ATOZI1, putative, expressed
RT1/D1W	7614	Pavir.J04424.1	30259702	Pavir.J04424.1.p|PACid:30259702	0.2174	1.16263641409585	0.2801	2	Abiotic/biotic stress	stress.abiotic.heat	AT5G23590.1	DNAJ heat shock N-terminal domain-containing protein	LOC_Os03g04400.1	heat shock protein DnaJ, putative, expressed
RT1/D1W	7620	Pavir.Gb00722.1	30223378	Pavir.Gb00722.1.p|PACid:30223378	0.02308	1.01612648744828	0.8886	3	Unclassified	not assigned.unknown	AT5G53800.1	N	LOC_Os04g44800.1	expressed protein
RT1/D1W	7633	Pavir.Ca02138.1	30206231	Pavir.Ca02138.1.p|PACid:30206231	-0.04517	0.969175607378502	0.6882	4	Functional enzyme	misc.gluco-, galacto- and mannosidases	AT2G44480.1	beta glucosidase 17	LOC_Os04g39880.1	Os4bglu12 - beta-glucosidase, exo-beta-glucanase, expressed
RT1/D1W	7641	Pavir.J26059.1	30208506	Pavir.J26059.1.p|PACid:30208506	0.3179	1.24651478945939	0.1375	2	Regulation of transcription	RNA.regulation of transcription.C2C2(Zn) GATA transcription factor family	AT5G25830.1	GATA transcription factor 12	LOC_Os12g07120.1	GATA zinc finger domain containing protein, expressed
RT1/D1W	7642	Pavir.Bb02067.1	30298895	Pavir.Bb02067.1.p|PACid:30298895	0.004532	1.00314628221083	0.982	2	Lipids metabolism	lipid metabolism.'exotics' (steroids, squalene etc).sphingolipids	AT2G46210.1	Fatty acid/sphingolipid desaturase	LOC_Os09g16920.1	desaturase/cytochrome b5 protein, putative, expressed
RT1/D1W	7660	Pavir.Bb00071.1	30299315	Pavir.Bb00071.1.p|PACid:30299315	-0.21812	0.859684976682918	0.0032	4	Regulation of transcription	RNA.regulation of transcription.putative transcription regulator	AT5G61150.2	leo1-like family protein	LOC_Os07g01880.1	VIP4, putative, expressed
RT1/D1W	7669	Pavir.J03370.1	30208653	Pavir.J03370.1.p|PACid:30208653	0.6613	1.58150706416623	0.0118	2	Unclassified	not assigned.unknown	AT3G08880.1	N	LOC_Os04g36780.1	expressed protein
RT1/D1W	7684	Pavir.Ea01872.1	30231199	Pavir.Ea01872.1.p|PACid:30231199	1.3753	2.59421850579082	<.0001	3	Protein degradation	protein.degradation.serine protease	AT1G15000.1	serine carboxypeptidase-like 50	LOC_Os05g50580.1	OsSCP30 - Putative Serine Carboxypeptidase homologue, expressed
RT1/D1W	7692	Pavir.Ea02493.1	30228656	Pavir.Ea02493.1.p|PACid:30228656	0.47832	1.39312045040589	<.0001	4	Unclassified	not assigned.unknown	AT3G27610.2	Nucleotidylyl transferase superfamily protein	LOC_Os01g49670.1	cytidylyltransferase domain containing protein, expressed
RT1/D1W	7697	Pavir.J07406.1	30195933	Pavir.J07406.1.p|PACid:30195933	0.1223	1.08846875885472	0.2813	2			AT2G43370.1	RNA-binding (RRM/RBD/RNP motifs) family protein	LOC_Os09g33870.1	RNA recognition motif containing protein, putative, expressed
RT1/D1W	7698	Pavir.Da02099.1	30193012	Pavir.Da02099.1.p|PACid:30193012	0.8292	1.77669987751534	<.0001	4	Minor CHO metabolism	minor CHO metabolism.raffinose family.raffinose synthases.putative	AT5G20250.4	Raffinose synthase family protein	LOC_Os06g07600.1	uncharacterized glycosyltransferase, putative, expressed
RT1/D1W	7708	Pavir.J28006.1	30287589	Pavir.J28006.1.p|PACid:30287589	0.4651	1.38041303302077	0.0018	2	Amino acid metabolism	amino acid metabolism.synthesis.serine-glycine-cysteine group.cysteine.OASTL	AT2G43750.1	O-acetylserine (thiol) lyase B	LOC_Os06g05700.1	cysteine synthase, putative, expressed
RT1/D1W	7709	Pavir.Ia02207.1	30214752	Pavir.Ia02207.1.p|PACid:30214752	0.01944	1.01356597520023	0.8691	2	Protein degradation	protein.degradation.autophagy	AT5G61500.1	autophagy 3 (APG3)	LOC_Os01g10290.1	autophagy-related protein 3, putative, expressed
RT1/D1W	7717	Pavir.Ib01478.1	30242562	Pavir.Ib01478.1.p|PACid:30242562	-0.4845	0.714744738600538	0.0388	2	Protein synthesis	protein.synthesis.ribosomal protein.prokaryotic.unknown organellar.30S subunit.S1	AT5G30510.1	ribosomal protein S1	LOC_Os03g20100.1	S1 RNA binding domain containing protein, expressed
RT1/D1W	7718	Pavir.Da01134.1	30192281	Pavir.Da01134.1.p|PACid:30192281	-0.01653	0.988607666834905	0.9503	2	Unclassified	not assigned.no ontology.formin homology 2 domain-containing protein	AT1G49590.1	C2H2 and C2HC zinc fingers superfamily protein	LOC_Os06g11170.1	formin-binding protein-related, putative, expressed
RT1/D1W	7720	Pavir.J23696.1	30294265	Pavir.J23696.1.p|PACid:30294265	0.3562	1.28004985413427	0.0189	3	Abiotic/biotic stress	stress.biotic	AT1G02360.1	Chitinase family protein	LOC_Os05g04690.1	CHIT11 - Chitinase family protein precursor, expressed
RT1/D1W	7723	Pavir.J34793.1	30195723	Pavir.J34793.1.p|PACid:30195723	1.011	2.01530752082101	0.0609	2	Transport	transport.misc	AT2G20840.1	Secretory carrier membrane protein (SCAMP) family protein	LOC_Os03g38590.1	secretory carrier-associated membrane protein 4, putative, expressed
RT1/D1W	7731	Pavir.Fa00402.1	30188092	Pavir.Fa00402.1.p|PACid:30188092	0.1126	1.08117495657434	0.621	2	Regulation of transcription	RNA.regulation of transcription.putative transcription regulator	AT5G60170.2	RNA binding (RRM/RBD/RNP motifs) family protein	LOC_Os12g01190.2	RNA recognition motif containing protein, putative, expressed
RT1/D1W	7735	Pavir.J29005.1	30281472	Pavir.J29005.1.p|PACid:30281472	0.16949	1.12466084110798	0.1009	2	Unclassified	not assigned.unknown	N	N	LOC_Os10g30870.1	expressed protein
RT1/D1W	7741	Pavir.Ba01216.1	30291840	Pavir.Ba01216.1.p|PACid:30291840	3.1744	9.02795983464556	<.0001	2	RNA processing	RNA.processing.ribonucleases	AT1G14220.1	Ribonuclease T2 family protein	LOC_Os09g36680.1	ribonuclease T2 family domain containing protein, expressed
RT1/D1W	7743	Pavir.Ca01660.1	30205332	Pavir.Ca01660.1.p|PACid:30205332	0.1272	1.09217194243191	0.3135	2	Unclassified	not assigned.unknown	AT4G32900.2	Peptidyl-tRNA hydrolase II (PTH2) family protein	LOC_Os05g44390.1	peptidyl-tRNA hydrolase, putative, expressed
RT1/D1W	7756	Pavir.Eb02573.1	30311809	Pavir.Eb02573.1.p|PACid:30311809	-1.6818	0.311693505468734	0.0119	2	Unclassified	not assigned.unknown	N	N	LOC_Os01g46440.1	VQ domain containing protein, putative, expressed
RT1/D1W	7773	Pavir.Fb01108.1	30279461	Pavir.Fb01108.1.p|PACid:30279461	-0.2582	0.836130479582363	0.0965	2	Unclassified	not assigned.unknown	AT5G57830.1	Protein of unknown function, DUF593	LOC_Os08g16790.1	DUF593 domain containing protein, expressed
RT1/D1W	7788	Pavir.Ba03865.1	30293805	Pavir.Ba03865.1.p|PACid:30293805	-0.1125	0.924983797524369	0.6489	2	Unclassified	not assigned.no ontology	AT1G34770.1	N	LOC_Os07g05650.1	MAGE-8 antigen-related, putative, expressed
RT1/D1W	7793	Pavir.J00652.1	30245186	Pavir.J00652.1.p|PACid:30245186	0.12728	1.0922325069833	0.1657	2	Unclassified	not assigned.unknown	AT1G14590.1	Nucleotide-diphospho-sugar transferase family protein	LOC_Os01g69200.1	regulatory protein, putative, expressed
RT1/D1W	7803	Pavir.Hb00342.1	30265211	Pavir.Hb00342.1.p|PACid:30265211	0.1689	1.12420099740275	0.3508	8	Abiotic/biotic stress	stress.biotic	AT3G46530.1	NB-ARC domain-containing disease resistance protein	LOC_Os11g37759.1	stripe rust resistance protein Yr10, putative, expressed
RT1/D1W	7808	Pavir.Ca00446.1	30204528	Pavir.Ca00446.1.p|PACid:30204528	0.4596	1.37516048983232	0.0088	2	Functional enzyme	misc.aminotransferases.aminotransferase class IV family protein	AT5G57850.1	D-aminoacid aminotransferase-like PLP-dependent enzymes superfamily protein	LOC_Os05g15530.1	aminotransferase domain containing protein, putative, expressed
RT1/D1W	7833	Pavir.J10091.1	30190800	Pavir.J10091.1.p|PACid:30190800	-0.3236	0.79907343593828	0.0265	2	Secondary metabolism	secondary metabolism.phenylpropanoids	AT2G33590.1	NAD(P)-binding Rossmann-fold superfamily protein	LOC_Os06g41840.1	reductase, putative, expressed
RT1/D1W	7835	Pavir.J36314.1	30199286	Pavir.J36314.1.p|PACid:30199286	0.4201	1.33802029607148	0.0077	3	Unclassified	not assigned.no ontology.C2 domain-containing protein	AT1G22610.1	C2 calcium/lipid-binding plant phosphoribosyltransferase family protein	LOC_Os05g35480.1	anthranilate phosphoribosyltransferase, putative, expressed
RT1/D1W	7838	Pavir.Eb01540.1	30311144	Pavir.Eb01540.1.p|PACid:30311144	-0.1565	0.897199051281889	0.4291	3	Unclassified	not assigned.no ontology	AT1G51730.1	Ubiquitin-conjugating enzyme family protein	LOC_Os01g37770.1	RWD domain containing protein, expressed
RT1/D1W	7843	Pavir.Cb00638.1	30267967	Pavir.Cb00638.1.p|PACid:30267967	0.4898	1.4042501918316	0.1559	2	Functional enzyme	misc.cytochrome P450	AT5G36110.1	cytochrome P450, family 716, subfamily A, polypeptide 1	LOC_Os07g33440.1	cytochrome P450, putative, expressed
RT1/D1W	7859	Pavir.J02823.1	30225282	Pavir.J02823.1.p|PACid:30225282	0.08213	1.05857977828414	0.5439	2	Transport	transport.calcium	AT5G57110.1	autoinhibited Ca2+ -ATPase, isoform 8	LOC_Os04g51610.1	calcium-transporting ATPase, plasma membrane-type, putative, expressed
RT1/D1W	7860	Pavir.Da02368.1	30193042	Pavir.Da02368.1.p|PACid:30193042	0.3196	1.24798448615816	0.0323	2	Protein synthesis	protein.synthesis.ribosomal protein.eukaryotic.40S subunit.S15A	AT4G29430.1	ribosomal protein S15A E	LOC_Os02g15610.1	40S ribosomal protein S15a, putative, expressed
RT1/D1W	7866	Pavir.Eb00667.1	30308797	Pavir.Eb00667.1.p|PACid:30308797	0.27853	1.21295833930789	0.0005	3	Unclassified	not assigned.unknown	AT1G68390.1	Core-2/I-branching beta-1,6-N-acetylglucosaminyltransferase family protein	LOC_Os01g04220.1	DNA binding protein, putative, expressed
RT1/D1W	7876	Pavir.Cb00076.1	30267808	Pavir.Cb00076.1.p|PACid:30267808	0.01634	1.01139040718614	0.8878	3	Unclassified	not assigned.unknown	AT5G15120.1	Protein of unknown function (DUF1637)	LOC_Os12g42860.1	2-aminoethanethiol dioxygenase, putative, expressed
RT1/D1W	7901	Pavir.J01977.1	30287418	Pavir.J01977.1.p|PACid:30287418	0.34767	1.2725038312777	0.0055	2	Unclassified	not assigned.no ontology.C2 domain-containing protein	AT4G17140.3	pleckstrin homology (PH) domain-containing protein	LOC_Os02g27130.1	expressed protein
RT1/D1W	7920	Pavir.Ib01894.1	30238708	Pavir.Ib01894.1.p|PACid:30238708	0.19725	1.14651084370518	0.0048	2	Regulation of transcription	RNA.regulation of transcription.unclassified	AT1G09920.1	TRAF-type zinc finger-related	LOC_Os03g24184.1	TRAF-type zinc finger domain-containing protein 1, putative, expressed
RT1/D1W	7922	Pavir.Ba02951.1	30288857	Pavir.Ba02951.1.p|PACid:30288857	0.3771	1.29872862061823	0.1502	2	Development	development.unspecified	AT2G19430.1	DWD (DDB1-binding WD40 protein) hypersensitive to ABA 1	LOC_Os09g19900.1	WD domain, G-beta repeat domain containing protein, expressed
RT1/D1W	7929	Pavir.Ba00891.1	30293242	Pavir.Ba00891.1.p|PACid:30293242	-0.27136	0.828538131097634	0.0004	3	Unclassified	not assigned.no ontology	AT1G28340.1	receptor like protein 4	LOC_Os07g31840.1	leucine-rich repeat family protein, putative, expressed
RT1/D1W	7955	Pavir.Ca01147.1	30203698	Pavir.Ca01147.1.p|PACid:30203698	0.4273	1.34471459061954	0.1076	2	RNA processing	RNA.processing.splicing	AT2G47580.1	spliceosomal protein U1A	LOC_Os05g06280.1	ATKINESIN-13A/KINESIN-13A, putative, expressed
RT1/D1W	7967	Pavir.Fa00826.1	30186620	Pavir.Fa00826.1.p|PACid:30186620	0.2318	1.1742991674978	0.0496	3	Unclassified	not assigned.unknown	AT5G65490.1	N	LOC_Os08g34740.1	SGT1 protein, putative, expressed
RT1/D1W	7976	Pavir.Eb03696.1	30309366	Pavir.Eb03696.1.p|PACid:30309366	0.06333	1.04487473868482	0.805	2	Unclassified	not assigned.unknown	AT2G39740.1	Nucleotidyltransferase family protein	LOC_Os01g62790.1	expressed protein
RT1/D1W	7989	Pavir.Gb00709.1	30221608	Pavir.Gb00709.1.p|PACid:30221608	0.22835	1.17149435304991	0.0043	3	Unclassified	not assigned.no ontology	AT1G52530.1	N	LOC_Os04g44620.1	hus1-like protein, expressed
RT1/D1W	7993	Pavir.J17842.1	30217611	Pavir.J17842.1.p|PACid:30217611	0.1339	1.0972558789614	0.3313	2	Cell organization	cell.organisation	AT5G53310.1	myosin heavy chain-related	LOC_Os01g43360.1	myosin-Ie, putative, expressed
RT1/D1W	8000	Pavir.J09909.1	30196457	Pavir.J09909.1.p|PACid:30196457	-0.05898	0.959942568576365	0.747	2	Unclassified	not assigned.unknown	AT5G57510.1	N	LOC_Os08g34800.1	expressed protein
RT1/D1W	8003	Pavir.Fa00114.1	30188357	Pavir.Fa00114.1.p|PACid:30188357	-0.4109	0.752154009230597	0.0453	3	Regulation of transcription	RNA.regulation of transcription.AP2/EREBP, APETALA2/Ethylene-responsive element binding protein family	AT4G25480.1	dehydration response element B1A	LOC_Os08g43200.1	dehydration-responsive element-binding protein, putative, expressed
RT1/D1W	8014	Pavir.J24551.1	30256353	Pavir.J24551.1.p|PACid:30256353	-0.1605	0.894714932621728	0.287	3	Unclassified	not assigned.unknown	AT3G18180.1	Glycosyltransferase family 61 protein	LOC_Os06g49320.1	glycosyltransferase, putative, expressed
RT1/D1W	8042	Pavir.J00952.1	30272695	Pavir.J00952.1.p|PACid:30272695	0.80362	1.74547537060781	<.0001	4	Signaling regulation	signalling.receptor kinases.leucine rich repeat VIII.VIII-1	AT1G06840.1	Leucine-rich repeat protein kinase family protein	LOC_Os05g40270.1	expressed protein
RT1/D1W	8044	Pavir.J36239.1	30282461	Pavir.J36239.1.p|PACid:30282461	0.2221	1.16643021776813	0.081	3	Secondary metabolism	secondary metabolism.simple phenols	AT3G09220.1	laccase 7	LOC_Os10g20610.1	laccase-15 precursor, putative, expressed
RT1/D1W	8050	Pavir.Hb00619.1	30264802	Pavir.Hb00619.1.p|PACid:30264802	0.09495	1.06802839236298	0.4805	3			AT1G08660.1	MALE GAMETOPHYTE DEFECTIVE 2	LOC_Os11g36420.1	sialyltransferase family domain containing protein, expressed
RT1/D1W	8067	Pavir.J24493.1	30254586	Pavir.J24493.1.p|PACid:30254586	2.3116	4.96433336980504	<.0001	14			N	N	N	N
RT1/D1W	8069	Pavir.J00889.1	30275046	Pavir.J00889.1.p|PACid:30275046	0.6923	1.61585752841318	0.0003	2	Protein targeting & vesicle tansport	protein.targeting.secretory pathway.unspecified	AT3G46450.1	SEC14 cytosolic factor family protein / phosphoglyceride transfer family protein	LOC_Os03g60610.1	SEC14 cytosolic factor family protein, putative, expressed
RT1/D1W	8073	Pavir.Da00769.1	30193357	Pavir.Da00769.1.p|PACid:30193357	0.3955	1.31539856361864	0.228	2	Unclassified	not assigned.unknown	AT3G13780.1	SMAD/FHA domain-containing protein	LOC_Os06g36940.1	expressed protein
RT1/D1W	8088	Pavir.Ea02084.1	30227281	Pavir.Ea02084.1.p|PACid:30227281	1.2791	2.42687533284698	0.0001	2	Unclassified	not assigned.unknown	AT3G49601.1	N	LOC_Os04g51960.1	expressed protein
RT1/D1W	8104	Pavir.Ib01702.1	30237624	Pavir.Ib01702.1.p|PACid:30237624	0.894	1.85832134850183	<.0001	2	Unclassified	not assigned.no ontology	AT2G41250.1	Haloacid dehalogenase-like hydrolase (HAD) superfamily protein	LOC_Os07g46520.1	rhythmically expressed gene 2 protein, putative, expressed
RT1/D1W	8129	Pavir.J11028.1	30216260	Pavir.J11028.1.p|PACid:30216260	0.2815	1.21545796454775	0.0781	2	Abiotic/biotic stress	stress.biotic	AT4G38660.1	Pathogenesis-related thaumatin superfamily protein	LOC_Os10g05600.1	thaumatin-like protein 1 precursor, putative, expressed
RT1/D1W	8137	Pavir.Da01335.1	30193130	Pavir.Da01335.1.p|PACid:30193130	0.60722	1.5233210168395	<.0001	3	RNA synthesis	RNA.transcription	AT3G21350.1	RNA polymerase transcriptional regulation mediator-related	LOC_Os06g11370.1	mediator of RNA polymerase II transcription subunit 6, putative, expressed
RT1/D1W	8153	Pavir.J22737.1	30272318	Pavir.J22737.1.p|PACid:30272318	0.2114	1.15781118591598	0.4999	2	Unclassified	not assigned.unknown	AT2G39080.1	NAD(P)-binding Rossmann-fold superfamily protein	ChrUn.fgenesh.mRNA.69	expressed protein
RT1/D1W	8155	Pavir.J21473.1	30259641	Pavir.J21473.1.p|PACid:30259641	0.4975	1.41176503911088	0.0274	3	Unclassified	not assigned.unknown	AT2G46000.1	N	LOC_Os03g05450.1	expressed protein
RT1/D1W	8156	Pavir.Eb00525.1	30311296	Pavir.Eb00525.1.p|PACid:30311296	0.3513	1.27570964046127	0.0149	2	Protein synthesis	protein.aa activation.aspartate-tRNA ligase	AT4G33760.1	tRNA synthetase class II (D, K and N) family protein	LOC_Os01g06020.1	aspartyl-tRNA synthetase, putative, expressed
RT1/D1W	8158	Pavir.J10187.1	30196193	Pavir.J10187.1.p|PACid:30196193	-0.2021	0.869284303805293	0.0805	2	Unclassified	not assigned.unknown	AT5G10750.1	Protein of unknown function (DUF1336)	LOC_Os06g48320.1	EDR2, putative, expressed
RT1/D1W	8159	Pavir.Bb00785.1	30297042	Pavir.Bb00785.1.p|PACid:30297042	0.3673	1.28993645751448	0.0055	3	Regulation of transcription	RNA.regulation of transcription.Alfin-like	AT3G11200.1	alfin-like 2	LOC_Os07g12910.1	PHD finger protein, putative, expressed
RT1/D1W	8160	Pavir.J24755.1	30190848	Pavir.J24755.1.p|PACid:30190848	0.16429	1.12061444927221	0.0052	3	Unclassified	not assigned.no ontology	AT1G31660.1	N	LOC_Os09g18320.1	bystin, putative, expressed
RT1/D1W	8178	Pavir.Ea01404.1	30227103	Pavir.Ea01404.1.p|PACid:30227103	0.3127	1.24202998205534	0.04	2	Unclassified	not assigned.unknown	AT1G09310.1	Protein of unknown function, DUF538	LOC_Os07g02850.1	DUF538 domain containing protein, putative, expressed
RT1/D1W	8202	Pavir.J10638.1	30219522	Pavir.J10638.1.p|PACid:30219522	0.0373	1.02619151367835	0.7642	2	Regulation of transcription	RNA.regulation of transcription.GeBP like	AT1G11510.1	DNA-binding storekeeper protein-related transcriptional regulator	LOC_Os08g36450.1	transcription regulator, putative, expressed
RT1/D1W	8214	Pavir.Ab01722.1	30236183	Pavir.Ab01722.1.p|PACid:30236183	-0.0008973	0.999378232412511	0.9913	3	Unclassified	not assigned.unknown	AT3G18240.1	Ribosomal protein S24/S35, mitochondrial	LOC_Os08g40230.1	expressed protein
RT1/D1W	8222	Pavir.Ia04222.1	30209404	Pavir.Ia04222.1.p|PACid:30209404	1.7207	3.29596289233222	<.0001	4	Mitochondrial electron transport / ATP synthesis	mitochondrial electron transport / ATP synthesis.cytochrome c oxidase	AT1G69750.1	cytochrome c oxidase 19-2	LOC_Os02g20940.1	CHCH domain containing protein, expressed
RT1/D1W	8230	Pavir.J01897.1	30314876	Pavir.J01897.1.p|PACid:30314876	0.40242	1.32172313209267	0.0007	3	Unclassified	not assigned.no ontology.hydroxyproline rich proteins	AT2G33490.1	hydroxyproline-rich glycoprotein family protein	LOC_Os04g32370.1	hydroxyproline-rich glycoprotein family protein, putative, expressed
RT1/D1W	8235	Pavir.Fb02362.1	30279336	Pavir.Fb02362.1.p|PACid:30279336	0.4054	1.32445607669112	0.0059	2	Protein degradation	protein.degradation.ubiquitin.E3.RING	AT1G65430.1	IBR domain-containing protein	LOC_Os08g42740.2	IBR domain containing protein, putative, expressed
RT1/D1W	8254	Pavir.J36298.1	30271987	Pavir.J36298.1.p|PACid:30271987	0.15169	1.11087000412046	0.0696	3	Unclassified	not assigned.no ontology	AT2G46380.1	Protein of unknown function (DUF3133)	LOC_Os01g43330.1	extra-large G-protein-related, putative, expressed
RT1/D1W	8256	Pavir.Ea00405.1	30231537	Pavir.Ea00405.1.p|PACid:30231537	-0.07279	0.950797490103474	0.6808	2	Unclassified	not assigned.unknown	AT5G50150.1	Protein of Unknown Function (DUF239)	LOC_Os01g07570.1	carboxyl-terminal proteinase, putative, expressed
RT1/D1W	8259	Pavir.Cb01707.1	30267552	Pavir.Cb01707.1.p|PACid:30267552	0.08821	1.06305040167879	0.5512	2	Phyto-hormone metabolism	hormone metabolism.gibberelin.synthesis-degradation.GA2 oxidase	AT1G78440.1	Arabidopsis thaliana gibberellin 2-oxidase 1	LOC_Os01g11150.1	gibberellin 2-beta-dioxygenase, putative, expressed
RT1/D1W	8268	Pavir.J36579.1	30315083	Pavir.J36579.1.p|PACid:30315083	0.20366	1.15161620892663	0.0435	2	Secondary metabolism	secondary metabolism.flavonoids.anthocyanins.anthocyanin 5-aromatic acyltransferase	AT1G03495.1	HXXXD-type acyl-transferase family protein	LOC_Os02g57480.1	transferase family protein, putative, expressed
RT1/D1W	8276	Pavir.Db00796.1	30261231	Pavir.Db00796.1.p|PACid:30261231	-0.07949	0.946392142012143	0.3219	3	Regulation of transcription	RNA.regulation of transcription.C2H2 zinc finger family	AT4G21160.1	Calcium-dependent ARF-type GTPase activating protein family	LOC_Os06g40704.1	stromal membrane-associated protein, putative, expressed
RT1/D1W	8284	Pavir.Eb03638.1	30313047	Pavir.Eb03638.1.p|PACid:30313047	0.2978	1.22926844265089	0.0151	6	Regulation of transcription	RNA.regulation of transcription.CCAAT box binding factor family, HAP3	AT3G53340.1	nuclear factor Y, subunit B10	LOC_Os03g29970.1	histone-like transcription factor and archaeal histone, putative, expressed
RT1/D1W	8291	Pavir.Ab03078.1	30232287	Pavir.Ab03078.1.p|PACid:30232287	0.9126	1.88243493493491	0.0182	2	Protein targeting & vesicle tansport	protein.targeting.chloroplast	AT3G52420.1	outer envelope membrane protein 7	LOC_Os02g48480.1	expressed protein
RT1/D1W	8292	Pavir.Ba01346.1	30289123	Pavir.Ba01346.1.p|PACid:30289123	0.5914	1.50670815693133	0.0036	2			AT4G32180.1	pantothenate kinase 2	LOC_Os09g36270.1	pantothenate kinase, putative, expressed
RT1/D1W	8297	Pavir.Ib04381.1	30239665	Pavir.Ib04381.1.p|PACid:30239665	0.29243	1.22470136427497	0.0143	2	Signaling regulation	signalling.MAP kinases	AT4G08500.1	MAPK/ERK kinase kinase 1	LOC_Os03g49640.1	STE_MEKK_ste11_MAP3K.14 - STE kinases include homologs to sterile 7, sterile 11 and sterile 20 from yeast, expressed
RT1/D1W	8299	Pavir.Ca00163.1	30205573	Pavir.Ca00163.1.p|PACid:30205573	-0.04065	0.972216820645358	0.6907	4	RNA processing	RNA.processing	AT1G08370.1	decapping 1	LOC_Os11g05650.1	mRNA-decapping enzyme, putative, expressed
RT1/D1W	8301	Pavir.Ea00099.1	30229788	Pavir.Ea00099.1.p|PACid:30229788	0.3964	1.3162194079518	0.0427	2	Unclassified	not assigned.no ontology	AT2G46200.1	N	LOC_Os01g12670.1	expressed protein
RT1/D1W	8317	Pavir.J13575.1	30272025	Pavir.J13575.1.p|PACid:30272025	0.21028	1.15691269713445	0.0301	2	Unclassified	not assigned.no ontology.pentatricopeptide (PPR) repeat-containing protein	AT1G04590.1	N	LOC_Os12g02950.1	EMB2748, putative, expressed
RT1/D1W	8329	Pavir.Ga00109.1	30303019	Pavir.Ga00109.1.p|PACid:30303019	-0.2791	0.8241049603705	0.0647	2	DNA synthesis	DNA.synthesis/chromatin structure	AT1G59990.1	DEA(D/H)-box RNA helicase family protein	N	N
RT1/D1W	8330	Pavir.Ea03558.1	30225961	Pavir.Ea03558.1.p|PACid:30225961	0.1723	1.12685352673945	0.1728	2	Unclassified	not assigned.unknown	AT1G05960.1	ARM repeat superfamily protein	LOC_Os01g67290.1	cyclin-related protein, putative, expressed
RT1/D1W	8345	Pavir.Eb03537.1	30313259	Pavir.Eb03537.1.p|PACid:30313259	-0.07363	0.950244055452389	0.5896	2	Signaling regulation	signalling.G-proteins	AT5G17790.1	zinc finger (Ran-binding) family protein	LOC_Os01g59980.1	zinc finger family protein, putative, expressed
RT1/D1W	8349	Pavir.Fa00184.1	30185480	Pavir.Fa00184.1.p|PACid:30185480	1.4164	2.6691862923527	0.0002	3	Lipids metabolism	lipid metabolism.lipid degradation.beta-oxidation.acyl CoA reductase	AT4G33790.1	Jojoba acyl CoA reductase-related male sterility protein	LOC_Os08g44360.1	male sterility protein 2, putative, expressed
RT1/D1W	8361	Pavir.Aa02409.1	30249987	Pavir.Aa02409.1.p|PACid:30249987	0.04784	1.03371608710798	0.7882	2	Unclassified	not assigned.no ontology	AT1G30240.2	N	LOC_Os05g22990.1	expressed protein
RT1/D1W	8365	Pavir.Ia00986.1	30209668	Pavir.Ia00986.1.p|PACid:30209668	0.3787	1.30016975573623	0.006	2	Unclassified	not assigned.unknown	AT2G14660.1	N	LOC_Os03g47260.1	expressed protein
RT1/D1W	8369	Pavir.Ga01420.1	30302531	Pavir.Ga01420.1.p|PACid:30302531	0.6307	1.54831605895567	0.0039	2	Unclassified	not assigned.unknown	AT5G06350.1	ARM repeat superfamily protein	LOC_Os04g39220.1	expressed protein
RT1/D1W	8370	Pavir.J17662.1	30295096	Pavir.J17662.1.p|PACid:30295096	-0.2499	0.840954703771755	0.2962	2	RNA processing	RNA.processing.splicing	AT5G18810.1	SC35-like splicing factor 28	LOC_Os03g24890.2	RNA recognition motif containing protein, putative, expressed
RT1/D1W	8396	Pavir.J23688.1	30254428	Pavir.J23688.1.p|PACid:30254428	0.09874	1.07083782126441	0.4845	2	Development	development.unspecified	AT4G24220.1	NAD(P)-binding Rossmann-fold superfamily protein	LOC_Os03g32170.1	NAD dependent epimerase/dehydratase family protein, putative, expressed
RT1/D1W	8409	Pavir.Gb01712.1	30224333	Pavir.Gb01712.1.p|PACid:30224333	0.8582	1.81277516311507	<.0001	2	Unclassified	not assigned.no ontology	AT2G35450.1	catalytics;hydrolases	LOC_Os04g32150.1	amidohydrolase family protein, expressed
RT1/D1W	8417	Pavir.Ba00847.1	30288631	Pavir.Ba00847.1.p|PACid:30288631	0.05581	1.03944253369495	0.3351	2	Unclassified	not assigned.unknown	AT5G55060.1	N	LOC_Os07g32670.1	expressed protein
RT1/D1W	8442	Pavir.Ab01409.1	30235467	Pavir.Ab01409.1.p|PACid:30235467	0.7088	1.63444405921208	0.0005	2	Unclassified	not assigned.no ontology.C2 domain-containing protein	AT1G48090.1	calcium-dependent lipid-binding family protein	LOC_Os02g27110.1	expressed protein
RT1/D1W	8447	Pavir.J06195.1	30258908	Pavir.J06195.1.p|PACid:30258908	0.1267	1.0917934900652	0.3897	2	RNA processing	RNA.processing	N	N	LOC_Os11g03570.1	protein of unknown function, DUF618 domain containing protein, expressed
RT1/D1W	8450	Pavir.Ab01278.1	30232106	Pavir.Ab01278.1.p|PACid:30232106	0.54772	1.4617737180548	0.0002	2	Unclassified	not assigned.unknown	AT5G03900.2	Iron-sulphur cluster biosynthesis family protein	LOC_Os02g33010.1	expressed protein
RT1/D1W	8460	Pavir.Db01736.1	30260400	Pavir.Db01736.1.p|PACid:30260400	0.37078	1.29305173631608	0.0016	3	Functional enzyme	misc.gluco-, galacto- and mannosidases.endoglucanase	AT1G70710.1	glycosyl hydrolase 9B1	LOC_Os06g14540.1	endoglucanase, putative, expressed
RT1/D1W	8464	Pavir.J40748.1	30315615	Pavir.J40748.1.p|PACid:30315615	1.221	2.33108239626912	<.0001	4	Unclassified	not assigned.unknown	AT5G51040.1	N	LOC_Os11g32480.1	TPR repeat region family protein, expressed
RT1/D1W	8469	Pavir.J18856.1	30199719	Pavir.J18856.1.p|PACid:30199719	0.4556	1.37135301608541	0.0003	2	Unclassified	not assigned.no ontology	AT1G28280.1	VQ motif-containing protein	LOC_Os01g54400.1	VQ domain containing protein, putative, expressed
RT1/D1W	8470	Pavir.Ba00385.1	30293526	Pavir.Ba00385.1.p|PACid:30293526	0.47002	1.38512866993847	0.0005	2	Unclassified	not assigned.no ontology	AT4G39720.1	VQ motif-containing protein	LOC_Os07g43140.1	VQ domain containing protein, putative, expressed
RT1/D1W	8476	Pavir.Ib00521.1	30237050	Pavir.Ib00521.1.p|PACid:30237050	0.57502	1.48969811458052	0.0001	2	Unclassified	not assigned.unknown	AT4G14600.1	Target SNARE coiled-coil domain protein	LOC_Os03g08870.1	expressed protein
RT1/D1W	8487	Pavir.Ib01337.1	30241520	Pavir.Ib01337.1.p|PACid:30241520	0.2518	1.19069177299394	0.4766	2	Cell wall synthesis / modification	cell wall.hemicellulose synthesis.glucuronoxylan	AT2G37090.1	Nucleotide-diphospho-sugar transferases superfamily protein	LOC_Os03g17850.1	glycosyltransferase family 43 protein, putative, expressed
RT1/D1W	8493	Pavir.Ca00545.1	30203897	Pavir.Ca00545.1.p|PACid:30203897	0.1567	1.11473439212475	0.2552	3	Unclassified	not assigned.unknown	AT1G55500.2	evolutionarily conserved C-terminal region 4	LOC_Os05g01520.1	ECT protein, putative, expressed
RT1/D1W	8495	Pavir.J33861.1	30274923	Pavir.J33861.1.p|PACid:30274923	0.4296	1.34686009618136	0.0093	3	Unclassified	not assigned.unknown	AT3G14280.1	N	LOC_Os10g25150.1	expressed protein
RT1/D1W	8512	Pavir.Cb00288.1	30267594	Pavir.Cb00288.1.p|PACid:30267594	0.31333	1.24257247353059	0.0026	5	Unclassified	not assigned.no ontology	AT1G04300.1	TRAF-like superfamily protein	LOC_Os12g40520.1	MATH domain containing protein, expressed
RT1/D1W	8513	Pavir.Fb01594.1	30279477	Pavir.Fb01594.1.p|PACid:30279477	0.4496	1.365661562474	0.0011	3			N	N	N	N
RT1/D1W	8516	Pavir.Db01820.1	30262624	Pavir.Db01820.1.p|PACid:30262624	0.03342	1.02343537073311	0.7756	2	Unclassified	not assigned.no ontology	AT2G43650.1	Sas10/U3 ribonucleoprotein (Utp) family protein	LOC_Os01g01510.1	sas10/Utp3 family protein, expressed
RT1/D1W	8526	Pavir.Ga01396.1	30304763	Pavir.Ga01396.1.p|PACid:30304763	-0.05448	0.962941459841364	0.7349	2	Unclassified	not assigned.unknown	AT3G57860.1	UV-B-insensitive 4-like	LOC_Os04g39670.1	expressed protein
RT1/D1W	8529	Pavir.Ia00318.1	30211830	Pavir.Ia00318.1.p|PACid:30211830	0.3741	1.29603079632924	0.0713	2	DNA synthesis	DNA.synthesis/chromatin structure	AT3G10690.1	DNA GYRASE A	LOC_Os02g47150.1	DNA topoisomerase 2, putative, expressed
RT1/D1W	8541	Pavir.Ab02665.1	30235998	Pavir.Ab02665.1.p|PACid:30235998	0.4413	1.35782730277527	0.0045	2	Regulation of transcription	RNA.regulation of transcription.MYB domain transcription factor family	AT3G47680.1	DNA binding	LOC_Os02g19460.1	cytokinin inducible protein, putative, expressed
RT1/D1W	8543	Pavir.Ca00923.1	30206085	Pavir.Ca00923.1.p|PACid:30206085	0.5914	1.50670815693133	0.0156	2	Regulation of transcription	RNA.regulation of transcription.HB,Homeobox transcription factor family	AT5G44180.1	Homeodomain-like transcriptional regulator	LOC_Os05g48820.1	DDT, putative, expressed
RT1/D1W	8572	Pavir.Ba02041.1	30289240	Pavir.Ba02041.1.p|PACid:30289240	0.26743	1.20366172787591	0.0049	3	Signaling regulation	signalling.phosphinositides.phosphatidylinositol-4-phosphate 5-kinase	AT1G21920.1	Histone H3 K4-specific methyltransferase SET7/9 family protein	LOC_Os09g28060.1	MORN repeat domain containing protein, expressed
RT1/D1W	8586	Pavir.Ia02878.1	30212718	Pavir.Ia02878.1.p|PACid:30212718	0.28384	1.21743099375802	0.0137	2	Protein modification	protein.postranslational modification	AT2G33700.1	Protein phosphatase 2C family protein	LOC_Os10g39540.1	protein phosphatase 2C, putative, expressed
RT1/D1W	8588	Pavir.Aa01353.1	30252206	Pavir.Aa01353.1.p|PACid:30252206	0.4989	1.41313568938604	0.0809	2	Unclassified	not assigned.no ontology	AT1G34020.1	Nucleotide-sugar transporter family protein	LOC_Os05g12490.1	transporter-related, putative, expressed
RT1/D1W	8620	Pavir.Ca01834.1	30206793	Pavir.Ca01834.1.p|PACid:30206793	1.7294	3.31589885288942	0.0004	2	Functional enzyme	misc.protease inhibitor/seed storage/lipid transfer protein (LTP) family protein	AT3G18280.1	Bifunctional inhibitor/lipid-transfer protein/seed storage 2S albumin superfamily protein	LOC_Os05g47700.1	LTPL152 - Protease inhibitor/seed storage/LTP family protein precursor, expressed
RT1/D1W	8624	Pavir.Ca01524.1	30203077	Pavir.Ca01524.1.p|PACid:30203077	1.2896	2.44460267363379	<.0001	2	Abiotic/biotic stress	stress.abiotic.unspecified	AT1G28290.1	arabinogalactan protein 31	LOC_Os05g45460.1	POEI52 - Pollen Ole e I allergen and extensin family protein precursor, expressed
RT1/D1W	8637	Pavir.Ha00590.1	30316767	Pavir.Ha00590.1.p|PACid:30316767	1.188	2.27836675444423	<.0001	2	Phyto-hormone metabolism	hormone metabolism.abscisic acid.induced-regulated-responsive-activated	AT5G50720.1	HVA22 homologue E	LOC_Os11g30500.1	HVA22, putative, expressed
RT1/D1W	8643	Pavir.Eb01048.1	30310108	Pavir.Eb01048.1.p|PACid:30310108	-0.02576	0.982302993003986	0.6791	2	Protein targeting & vesicle tansport	protein.targeting.secretory pathway.unspecified	AT1G22180.2	Sec14p-like phosphatidylinositol transfer family protein	LOC_Os01g16000.1	CRAL/TRIO domain containing protein, expressed
RT1/D1W	8657	Pavir.J22073.1	30189085	Pavir.J22073.1.p|PACid:30189085	0.5983	1.51393157346057	<.0001	3	Protein synthesis	protein.synthesis.initiation	AT5G18110.1	novel cap-binding protein	LOC_Os03g15590.1	eukaryotic translation initiation factor, putative, expressed
RT1/D1W	8670	Pavir.Ia02694.1	30213728	Pavir.Ia02694.1.p|PACid:30213728	0.20718	1.15442944264429	0.0242	2	Lipids metabolism	lipid metabolism.Phospholipid synthesis.1-acylglycerol-3-phosphate O-acyltransferase	AT1G32200.1	phospholipid/glycerol acyltransferase family protein	LOC_Os10g42720.1	acyltransferase, putative, expressed
RT1/D1W	8687	Pavir.Ia04623.1	30212891	Pavir.Ia04623.1.p|PACid:30212891	-0.03201	0.978056694051445	0.8575	2	Unclassified	not assigned.no ontology	AT3G49890.1	N	LOC_Os03g10410.1	expressed protein
RT1/D1W	8690	Pavir.Aa00281.1	30252896	Pavir.Aa00281.1.p|PACid:30252896	-0.2721	0.828113258908093	0.2556	2	Regulation of transcription	RNA.regulation of transcription.AP2/EREBP, APETALA2/Ethylene-responsive element binding protein family	AT1G53910.1	related to AP2 12	LOC_Os02g54160.1	AP2 domain containing protein, expressed
RT1/D1W	8698	Pavir.Ca01008.1	30204229	Pavir.Ca01008.1.p|PACid:30204229	-0.01605	0.98893664185475	0.833	2	Functional enzyme	misc.rhodanese	AT2G40760.1	Rhodanese/Cell cycle control phosphatase superfamily protein	LOC_Os05g25780.1	rhodanese-like domain containing protein, putative, expressed
RT1/D1W	8699	Pavir.J10248.1	30254705	Pavir.J10248.1.p|PACid:30254705	-0.02628	0.98194899891799	0.8766	2	Unclassified	not assigned.unknown	AT1G05410.1	Protein of unknown function (DUF1423)	LOC_Os03g53590.1	expressed protein
RT1/D1W	8706	Pavir.Ga02243.1	30303480	Pavir.Ga02243.1.p|PACid:30303480	0.6795	1.60158459206016	0.0027	2	Abiotic/biotic stress	stress.abiotic.heat	AT1G79940.1	DnaJ / Sec63 Brl domains-containing protein	LOC_Os04g24180.1	heat shock protein binding protein, putative, expressed
RT1/D1W	8712	Pavir.Ia00814.1	30215104	Pavir.Ia00814.1.p|PACid:30215104	0.09301	1.06659317386665	0.6451	2	Unclassified	not assigned.unknown	AT5G11760.1	N	LOC_Os03g49485.1	expressed protein
RT1/D1W	8713	Pavir.Ca02227.1	30206365	Pavir.Ca02227.1.p|PACid:30206365	0.98646	1.98131738165874	<.0001	2	Unclassified	not assigned.unknown	AT5G16720.1	Protein of unknown function, DUF593	LOC_Os12g29740.1	expressed protein
RT1/D1W	8718	Pavir.J40296.1	30314929	Pavir.J40296.1.p|PACid:30314929	-0.1024	0.931482131813429	0.4697	3	Functional enzyme	misc.cytochrome P450	AT2G30750.1	cytochrome P450, family 71, subfamily A, polypeptide 12	LOC_Os06g43384.1	cytochrome P450, putative, expressed
RT1/D1W	8722	Pavir.Eb00124.1	30310830	Pavir.Eb00124.1.p|PACid:30310830	0.3537	1.27783361754311	0.0378	2	Phyto-hormone metabolism	hormone metabolism.ethylene.synthesis-degradation.1-aminocyclopropane-1-carboxylate synthase	AT4G26200.1	1-amino-cyclopropane-1-carboxylate synthase 7	LOC_Os01g09700.1	aminotransferase, classes I and II, domain containing protein, expressed
RT1/D1W	8737	Pavir.Ba00206.1	30293630	Pavir.Ba00206.1.p|PACid:30293630	0.0705	1.05008055075261	0.5871	2	Protein synthesis	protein.synthesis.ribosomal protein.eukaryotic.40S subunit.S8	AT5G06360.1	Ribosomal protein S8e family protein	LOC_Os07g47580.1	ribosomal protein, putative, expressed
RT1/D1W	8748	Pavir.J16948.1	30217059	Pavir.J16948.1.p|PACid:30217059	0.2833	1.21697539524362	0.049	2	Functional enzyme	misc.short chain dehydrogenase/reductase (SDR)	AT5G61830.1	NAD(P)-binding Rossmann-fold superfamily protein	LOC_Os01g70430.1	oxidoreductase, short chain dehydrogenase/reductase family domain containing protein, expressed
RT1/D1W	8749	Pavir.J03917.1	30256773	Pavir.J03917.1.p|PACid:30256773	-0.1043	0.930256196251235	0.4415	2	Cell wall synthesis / modification	cell wall.modification	AT5G57550.1	xyloglucan endotransglucosylase/hydrolase 25	LOC_Os08g14200.1	glycosyl hydrolases family 16, putative, expressed
RT1/D1W	8766	Pavir.Cb01078.1	30269015	Pavir.Cb01078.1.p|PACid:30269015	-0.13642	0.909773930485975	0.1874	3	Unclassified	not assigned.unknown	AT5G05360.1	N	LOC_Os05g27660.1	expressed protein
RT1/D1W	8767	Pavir.Fa02150.1	30187165	Pavir.Fa02150.1.p|PACid:30187165	-0.1197	0.920379018163751	0.4033	2	Regulation of transcription	RNA.regulation of transcription.Nucleosome/chromatin assembly factor group	AT5G64630.2	Transducin/WD40 repeat-like superfamily protein	LOC_Os08g01680.1	WD domain, G-beta repeat domain containing protein, expressed
RT1/D1W	8796	Pavir.Fb01432.1	30278402	Pavir.Fb01432.1.p|PACid:30278402	-0.1282	0.914972317239101	0.4791	2	Cell wall synthesis / modification	cell wall.modification	AT4G30290.1	xyloglucan endotransglucosylase/hydrolase 19	LOC_Os08g13980.1	glycosyl hydrolases family 16, putative, expressed
RT1/D1W	8801	Pavir.Aa00695.1	30251186	Pavir.Aa00695.1.p|PACid:30251186	0.1122	1.08087523277766	0.3086	2	Cell wall synthesis / modification	cell wall.cell wall proteins.AGPs.AGP	AT4G12730.1	FASCICLIN-like arabinogalactan 2	LOC_Os02g49420.1	fasciclin-like arabinogalactan precursor protein, putative, expressed
RT1/D1W	8804	Pavir.J30634.1	30314750	Pavir.J30634.1.p|PACid:30314750	0.17148	1.12621322694084	0.0352	4	Secondary metabolism	secondary metabolism.isoprenoids.terpenoids	AT1G70080.1	Terpenoid cyclases/Protein prenyltransferases superfamily protein	LOC_Os03g24640.1	terpene synthase, putative, expressed
RT1/D1W	8820	Pavir.J06349.1	30246468	Pavir.J06349.1.p|PACid:30246468	0.05819	1.04115870713765	0.6806	2	Regulation of transcription	RNA.regulation of transcription.B3 transcription factor family	AT4G34400.1	AP2/B3-like transcriptional factor family protein	LOC_Os11g09160.1	B3 DNA binding domain containing protein, expressed
RT1/D1W	8826	Pavir.J27282.1	30259049	Pavir.J27282.1.p|PACid:30259049	0.1777	1.13107923707459	0.4447	2	Unclassified	not assigned.unknown	N	N	LOC_Os01g50450.1	expressed protein
RT1/D1W	8834	Pavir.Ia00122.1	30209735	Pavir.Ia00122.1.p|PACid:30209735	1.0632	2.08956118033882	0.0002	2	Unclassified	not assigned.unknown	AT3G60810.1	N	LOC_Os03g64140.1	expressed protein
RT1/D1W	8841	Pavir.Aa02674.1	30250930	Pavir.Aa02674.1.p|PACid:30250930	1.30012	2.46249364263472	<.0001	5	Functional enzyme	misc.aminotransferases.aminotransferase class IV family protein	AT5G57850.1	D-aminoacid aminotransferase-like PLP-dependent enzymes superfamily protein	LOC_Os02g17330.1	aminotransferase domain containing protein, putative, expressed
RT1/D1W	8854	Pavir.Gb01846.1	30223542	Pavir.Gb01846.1.p|PACid:30223542	0.5431	1.45710010888098	0.0118	2	Signaling regulation	signalling.receptor kinases.thaumatin like	AT5G38280.1	PR5-like receptor kinase	LOC_Os01g49614.1	Protein kinase domain containing protein, expressed
RT1/D1W	8856	Pavir.Db01770.1	30261164	Pavir.Db01770.1.p|PACid:30261164	0.09222	1.06600928196634	0.7053	2	Mitochondrial electron transport / ATP synthesis	mitochondrial electron transport / ATP synthesis.unspecified	AT4G21090.1	MITOCHONDRIAL FERREDOXIN 2	LOC_Os07g01930.1	2Fe-2S iron-sulfur cluster binding domain containing protein, expressed
RT1/D1W	8859	Pavir.Ia00725.1	30209289	Pavir.Ia00725.1.p|PACid:30209289	0.2791	1.21343766642349	0.0163	4	Unclassified	not assigned.unknown	AT3G49725.1	GTP-binding protein, HflX	LOC_Os03g51790.1	GTPase of unknown function domain containing protein, putative, expressed
RT1/D1W	8861	Pavir.Ba02673.1	30290867	Pavir.Ba02673.1.p|PACid:30290867	1.4499	2.73189114668132	0.0065	2	DNA synthesis	DNA.synthesis/chromatin structure.histone.core.H2B	AT1G08170.1	Histone superfamily protein	LOC_Os09g39730.1	Core histone H2A/H2B/H3/H4 domain containing protein, putative, expressed
RT1/D1W	8863	Pavir.Ea03876.1	30226741	Pavir.Ea03876.1.p|PACid:30226741	0.5958	1.51131040168451	0.0002	3	Functional enzyme	misc.glutathione S transferases	AT3G09270.1	glutathione S-transferase TAU 8	LOC_Os01g72140.1	glutathione S-transferase, putative, expressed
RT1/D1W	8865	Pavir.Ea00410.1	30231421	Pavir.Ea00410.1.p|PACid:30231421	0.08379	1.05979850693636	0.5396	2	Secondary metabolism	secondary metabolism.sulfur-containing.misc.alliinase	AT4G24670.1	tryptophan aminotransferase related 2	LOC_Os01g07500.1	alliin lyase precursor, putative, expressed
RT1/D1W	8869	Pavir.Eb01891.1	30309685	Pavir.Eb01891.1.p|PACid:30309685	1.5678	2.96452302096334	<.0001	2	Unclassified	not assigned.unknown	AT2G19530.1	N	LOC_Os01g39780.1	expressed protein
RT1/D1W	8882	Pavir.J03480.1	30244934	Pavir.J03480.1.p|PACid:30244934	1.203	2.30217898265553	0.0006	2	Unclassified	not assigned.unknown	AT5G07960.1	N	LOC_Os03g54980.1	expressed protein
RT1/D1W	8886	Pavir.Ab00742.1	30235168	Pavir.Ab00742.1.p|PACid:30235168	1.3018	2.46536285537425	<.0001	2	Unclassified	not assigned.unknown	AT5G51200.1	Protein of unknown function (DUF3414)	LOC_Os02g10790.1	expressed protein
RT1/D1W	8890	Pavir.Aa00372.1	30249563	Pavir.Aa00372.1.p|PACid:30249563	0.3809	1.30215392800845	0.0496	2			AT2G05320.1	beta-1,2-N-acetylglucosaminyltransferase II	LOC_Os02g55470.1	alpha-1,6-mannosyl-glycoprotein 2-beta-N-acetylglucosaminyltransferase, putative, expressed
RT1/D1W	8896	Pavir.Gb00092.1	30223313	Pavir.Gb00092.1.p|PACid:30223313	0.16464	1.12088634501313	0.0402	3	Phyto-hormone metabolism	hormone metabolism.ethylene.signal transduction	AT3G20310.1	ethylene response factor 7	LOC_Os04g57340.1	AP2 domain containing protein, expressed
RT1/D1W	8909	Pavir.Ea02807.1	30229803	Pavir.Ea02807.1.p|PACid:30229803	0.46798	1.38317145405018	<.0001	2			AT3G52905.1	Polynucleotidyl transferase, ribonuclease H-like superfamily protein	LOC_Os01g55900.1	holliday junction resolvase, putative, expressed
RT1/D1W	8912	Pavir.Ea02853.1	30227210	Pavir.Ea02853.1.p|PACid:30227210	-0.36561	0.776140637999464	0.0006	2	Unclassified	not assigned.unknown	AT3G09250.1	Nuclear transport factor 2 (NTF2) family protein	LOC_Os01g54960.1	expressed protein
RT1/D1W	8931	Pavir.Ea00021.1	30226668	Pavir.Ea00021.1.p|PACid:30226668	0.15824	1.11592494694008	0.0761	4	Regulation of transcription	RNA.regulation of transcription.C2H2 zinc finger family	AT1G03840.1	C2H2 and C2HC zinc fingers superfamily protein	LOC_Os01g14010.1	ZOS1-05 - C2H2 zinc finger protein, expressed
RT1/D1W	8933	Pavir.J39345.1	30247207	Pavir.J39345.1.p|PACid:30247207	0.3183	1.24686044465989	0.0094	3	Cell wall synthesis / modification	cell wall.pectin esterases.acetyl esterase	AT2G46930.1	Pectinacetylesterase family protein	LOC_Os01g21630.1	pectinacetylesterase domain containing protein, expressed
RT1/D1W	8962	Pavir.J07653.1	30201891	Pavir.J07653.1.p|PACid:30201891	0.54974	1.46382186473316	<.0001	2	Functional enzyme	misc.peroxidases	AT3G01190.1	Peroxidase superfamily protein	LOC_Os07g01400.1	peroxidase precursor, putative, expressed
RT1/D1W	8966	Pavir.Db01165.1	30262408	Pavir.Db01165.1.p|PACid:30262408	0.1624	1.11914735155641	0.5473	4	Glycolysis	glycolysis.unclear/dually targeted.phosphoglycerate mutase	AT3G50520.1	Phosphoglycerate mutase family protein	LOC_Os12g04120.1	phosphoglycerate mutase, putative, expressed
RT1/D1W	8991	Pavir.Ab00321.1	30233593	Pavir.Ab00321.1.p|PACid:30233593	0.14096	1.10263859101187	0.1663	2	Signaling regulation	signalling.in sugar and nutrient physiology	AT5G39790.1	5\'-AMP-activated protein kinase-related	LOC_Os02g04330.1	5-AMP-activated protein kinase beta-1 subunit-related, putative, expressed
RT1/D1W	9006	Pavir.Da00834.1	30191454	Pavir.Da00834.1.p|PACid:30191454	-0.03176	0.978226193046967	0.6334	2	Development	development.unspecified	AT1G65480.1	PEBP (phosphatidylethanolamine-binding protein) family protein	LOC_Os06g35940.1	osFTL12 FT-Like12 homologous to Flowering Locus T gene; contains Pfam profile PF01161: Phosphatidylethanolamine-binding protein, expressed
RT1/D1W	9016	Pavir.Ib00116.1	30240890	Pavir.Ib00116.1.p|PACid:30240890	0.2686	1.20463827204	0.1754	2	Unclassified	not assigned.unknown	AT4G34090.1	N	LOC_Os03g01920.1	expressed protein
RT1/D1W	9017	Pavir.Ia02959.1	30210224	Pavir.Ia02959.1.p|PACid:30210224	0.8975	1.86283513725941	0.0122	3	Functional enzyme	misc.glutathione S transferases	AT1G10360.1	glutathione S-transferase TAU 18	LOC_Os10g38600.1	glutathione S-transferase GSTU6, putative, expressed
RT1/D1W	9035	Pavir.J13926.1	30243552	Pavir.J13926.1.p|PACid:30243552	0.4265	1.34396912922271	0.0023	2	Phyto-hormone metabolism	hormone metabolism.auxin.induced-regulated-responsive-activated	AT3G43120.1	SAUR-like auxin-responsive protein family	LOC_Os09g26610.1	OsSAUR38 - Auxin-responsive SAUR gene family member, expressed
RT1/D1W	9039	Pavir.Ia00349.1	30209856	Pavir.Ia00349.1.p|PACid:30209856	-0.15158	0.900263978131712	0.144	2	Protein modification	protein.postranslational modification.kinase	AT4G33950.1	Protein kinase superfamily protein	LOC_Os03g55600.1	CAMK_CAMK_like.22 - CAMK includes calcium/calmodulin depedent protein kinases, expressed
RT1/D1W	9042	Pavir.Ea02775.1	30227253	Pavir.Ea02775.1.p|PACid:30227253	0.6396	1.55789715862651	0.0168	2	Protein modification	protein.postranslational modification	AT1G29230.1	CBL-interacting protein kinase 18	LOC_Os05g43840.1	CAMK_KIN1/SNF1/Nim1_like.25 - CAMK includes calcium/calmodulin depedent protein kinases, expressed
RT1/D1W	9045	Pavir.J10950.1	30276042	Pavir.J10950.1.p|PACid:30276042	0.2728	1.20815034657893	0.1064	3	Development	development.unspecified	AT2G37650.1	GRAS family transcription factor	LOC_Os12g38490.1	SCARECROW, putative, expressed
RT1/D1W	9061	Pavir.J18683.1	30199498	Pavir.J18683.1.p|PACid:30199498	-0.18403	0.880240709281862	0.0153	3	Protein targeting & vesicle tansport	protein.targeting.mitochondria	AT2G46470.1	inner membrane protein OXA1-like	LOC_Os03g02480.1	inner membrane protein, putative, expressed
RT1/D1W	9094	Pavir.J01090.1	30294226	Pavir.J01090.1.p|PACid:30294226	0.4244	1.34201425866491	0.0175	2	Amino acid metabolism	amino acid metabolism.synthesis.aromatic aa.tryptophan.tryptophan synthase	AT3G54640.1	tryptophan synthase alpha chain	LOC_Os03g58260.1	indole-3-glycerol phosphate lyase, chloroplast precursor, putative, expressed
RT1/D1W	9161	Pavir.Fa00007.1	30188531	Pavir.Fa00007.1.p|PACid:30188531	0.3597	1.28315904439644	0.2505	2	Unclassified	not assigned.unknown	AT3G61370.1	Protein of unknown function (DUF3245)	LOC_Os08g44540.1	expressed protein
RT1/D1W	9164	Pavir.J04349.1	30285557	Pavir.J04349.1.p|PACid:30285557	1.7134	3.27932752716853	<.0001	2	Functional enzyme	misc.misc2	AT5G20960.1	aldehyde oxidase 1	LOC_Os03g57690.1	aldehyde oxidase, putative, expressed
RT1/D1W	9169	Pavir.Fa00806.1	30186240	Pavir.Fa00806.1.p|PACid:30186240	1.6903	3.22723805240632	<.0001	2	Abiotic/biotic stress	stress.abiotic.heat	AT3G14200.1	Chaperone DnaJ-domain superfamily protein	LOC_Os08g35160.1	heat shock protein DnaJ, putative, expressed
RT1/D1W	9181	Pavir.Fb00127.1	30280063	Pavir.Fb00127.1.p|PACid:30280063	-0.5124	0.701055224591845	0.0737	2	Unclassified	not assigned.unknown	AT2G02570.1	nucleic acid binding;RNA binding	LOC_Os08g01840.1	nucleic acid binding protein, putative, expressed
RT1/D1W	9188	Pavir.Ea02501.1	30226948	Pavir.Ea02501.1.p|PACid:30226948	0.44152	1.35803437688014	<.0001	2	Unclassified	not assigned.unknown	AT1G15060.1	Uncharacterised conserved protein UCP031088, alpha/beta hydrolase	LOC_Os01g49760.1	expressed protein
RT1/D1W	9191	Pavir.J00421.1	30256074	Pavir.J00421.1.p|PACid:30256074	-0.3966	0.759646434425707	0.0612	2	Cell wall synthesis / modification	cell wall.modification	AT4G30290.1	xyloglucan endotransglucosylase/hydrolase 19	LOC_Os08g13980.1	glycosyl hydrolases family 16, putative, expressed
RT1/D1W	9204	Pavir.Ib00078.1	30240546	Pavir.Ib00078.1.p|PACid:30240546	0.4979	1.41215651776142	0.0085	2	Protein synthesis	protein.synthesis.ribosomal protein.prokaryotic.chloroplast.50S subunit.L5	AT4G01310.1	Ribosomal L5P family protein	LOC_Os03g03360.1	ribosomal protein L5, putative, expressed
RT1/D1W	9214	Pavir.J03184.1	30284066	Pavir.J03184.1.p|PACid:30284066	0.3838	1.30477405505922	0.0151	2			N	N	N	N
RT1/D1W	9225	Pavir.J17874.1	30276589	Pavir.J17874.1.p|PACid:30276589	0.4193	1.33727854575074	0.0212	2	Secondary metabolism	secondary metabolism.phenylpropanoids	AT2G33590.1	NAD(P)-binding Rossmann-fold superfamily protein	LOC_Os06g41810.1	reductase, putative, expressed
RT1/D1W	9226	Pavir.J41103.1	30199760	Pavir.J41103.1.p|PACid:30199760	0.4314	1.34854157502522	0.0188	2	Unclassified	not assigned.unknown	AT5G21070.1	N	LOC_Os01g17020.1	glycosyl hydrolases family 17 protein, putative, expressed
RT1/D1W	9230	Pavir.Ca02477.1	30203979	Pavir.Ca02477.1.p|PACid:30203979	0.01063	1.00739536617208	0.9631	2	Functional enzyme	misc.UDP glucosyl and glucoronyl transferases	AT2G29040.1	Exostosin family protein	LOC_Os12g38450.1	exostosin family domain containing protein, expressed
RT1/D1W	9237	Pavir.Ga01946.1	30303854	Pavir.Ga01946.1.p|PACid:30303854	0.1689	1.12420099740275	0.3917	2	Abiotic/biotic stress	stress.abiotic.heat	AT5G53150.1	DNAJ heat shock N-terminal domain-containing protein	LOC_Os04g31940.1	dnaJ domain containing protein, expressed
RT1/D1W	9244	Pavir.J29962.1	30243572	Pavir.J29962.1.p|PACid:30243572	0.9314	1.90712578482464	0.0009	2	Nucleotide metabolism	nucleotide metabolism.salvage.NUDIX hydrolases	AT1G79690.1	nudix hydrolase homolog 3	LOC_Os02g55030.1	hydrolase, NUDIX family, domain containing protein, expressed
RT1/D1W	9249	Pavir.Ea02730.1	30229445	Pavir.Ea02730.1.p|PACid:30229445	0.4732	1.38818514900148	0.0462	2	Protein modification	protein.postranslational modification	AT5G40280.1	Prenyltransferase family protein	LOC_Os01g53600.1	farnesyltransferase subunit beta, putative, expressed
RT1/D1W	9256	Pavir.Cb00389.1	30269649	Pavir.Cb00389.1.p|PACid:30269649	0.6322	1.54992671249186	0.0198	3	Unclassified	not assigned.unknown	AT1G56420.1	N	LOC_Os12g37390.1	expressed protein
RT1/D1W	9259	Pavir.Cb00521.1	30270012	Pavir.Cb00521.1.p|PACid:30270012	0.4489	1.36499910007823	0.0173	2	Unclassified	not assigned.unknown	AT3G17300.1	N	LOC_Os12g37850.1	expressed protein
RT1/D1W	9268	Pavir.J03861.1	30219253	Pavir.J03861.1.p|PACid:30219253	0.02535	1.01772656416019	0.6965	9	Protein degradation	protein.degradation.ubiquitin.E3.RING	AT3G25030.1	RING/U-box superfamily protein	LOC_Os09g32730.1	zinc finger, C3HC4 type domain containing protein, expressed
RT1/D1W	9306	Pavir.J27454.1	30256318	Pavir.J27454.1.p|PACid:30256318	0.07758	1.05524646764873	0.4973	2	Unclassified	not assigned.unknown	AT1G59710.1	Protein of unknown function (DUF569)	LOC_Os03g58740.1	expressed protein
RT1/D1W	9318	Pavir.Ea02965.1	30230793	Pavir.Ea02965.1.p|PACid:30230793	0.7346	1.66393606442501	0.0001	2	Unclassified	not assigned.unknown	AT5G45740.1	Ubiquitin domain-containing protein	LOC_Os01g53079.1	ubiquitin domain-containing protein 1, putative, expressed
RT1/D1W	9324	Pavir.J36180.1	30286096	Pavir.J36180.1.p|PACid:30286096	-0.5584	0.67905484219202	0.0231	2	Unclassified	not assigned.unknown	AT1G70420.1	Protein of unknown function (DUF1645)	LOC_Os02g04130.1	DUF1645 domain containing protein, putative, expressed
RT1/D1W	9330	Pavir.J31581.1	30195305	Pavir.J31581.1.p|PACid:30195305	0.56213	1.47644744108842	<.0001	2	Protein degradation	protein.degradation.serine protease	AT4G30810.1	serine carboxypeptidase-like 29	LOC_Os06g08720.3	OsSCP32 - Putative Serine Carboxypeptidase homologue, expressed
RT1/D1W	9342	Pavir.Eb03270.1	30311326	Pavir.Eb03270.1.p|PACid:30311326	-1.0169	0.494177078308102	0.0007	2	Regulation of transcription	RNA.regulation of transcription.Polycomb Group (PcG)	AT5G65910.1	BSD domain-containing protein	LOC_Os01g56100.1	BSD domain containing protein, expressed
RT1/D1W	9352	Pavir.Db00730.1	30260023	Pavir.Db00730.1.p|PACid:30260023	0.16725	1.12291599172836	0.0434	2	Unclassified	not assigned.no ontology	AT2G44420.1	protein N-terminal asparagine amidohydrolase family protein	LOC_Os06g41390.1	N-terminal asparagine amidohydrolase, putative, expressed
RT1/D1W	9359	Pavir.J04936.1	30225882	Pavir.J04936.1.p|PACid:30225882	0.005531	1.00384115545614	0.974	2	Functional enzyme	misc.acid and other phosphatases	AT5G50400.1	purple acid phosphatase 27	LOC_Os12g38760.1	nucleotide pyrophosphatase/phosphodiesterase, putative, expressed
RT1/D1W	9366	Pavir.Aa00508.1	30250833	Pavir.Aa00508.1.p|PACid:30250833	-0.1032	0.930965751626922	0.435	3	RNA processing	RNA.processing.ribonucleases	AT1G77680.1	Ribonuclease II/R family protein	LOC_Os02g51780.1	ribonuclease protein, putative, expressed
RT1/D1W	9370	Pavir.J40870.1	30243279	Pavir.J40870.1.p|PACid:30243279	0.7412	1.67156562998298	<.0001	2	Unclassified	not assigned.unknown	AT5G65520.1	Tetratricopeptide repeat (TPR)-like superfamily protein	LOC_Os02g10940.1	tetratricopeptide repeat domain containing protein, expressed
RT1/D1W	9387	Pavir.Ib04326.1	30242305	Pavir.Ib04326.1.p|PACid:30242305	0.06498	1.04607043807651	0.3657	3	Cell division & Cell cycle	cell.division.plastid	AT1G24490.1	OxaA/YidC-like membrane insertion protein	LOC_Os03g62750.1	inner membrane protein, putative, expressed
RT1/D1W	9393	Pavir.Gb01813.1	30223486	Pavir.Gb01813.1.p|PACid:30223486	0.1848	1.13665938786329	0.2751	2	Regulation of transcription	RNA.regulation of transcription.putative transcription regulator	AT5G09450.1	Tetratricopeptide repeat (TPR)-like superfamily protein	LOC_Os04g37720.1	pentatricopeptide, putative, expressed
RT1/D1W	9408	Pavir.J21230.1	30195166	Pavir.J21230.1.p|PACid:30195166	0.2992	1.23046191116901	0.0209	2	Protein modification	protein.postranslational modification	AT1G58210.1	kinase interacting family protein	LOC_Os01g34610.1	expressed protein
RT1/D1W	9421	Pavir.J24887.1	30285286	Pavir.J24887.1.p|PACid:30285286	1.0881	2.12593870245192	<.0001	2	Functional enzyme	misc.misc2	AT3G51000.1	alpha/beta-Hydrolases superfamily protein	LOC_Os10g35530.1	hydrolase, alpha/beta fold family domain containing protein, expressed
RT1/D1W	9427	Pavir.Ib04500.1	30242075	Pavir.Ib04500.1.p|PACid:30242075	0.7631	1.69713343566052	0.003	2	Functional enzyme	misc.plastocyanin-like	AT2G02850.1	plantacyanin	LOC_Os03g63390.1	plastocyanin-like domain containing protein, putative, expressed
RT1/D1W	9434	Pavir.Ca00276.1	30204200	Pavir.Ca00276.1.p|PACid:30204200	0.3415	1.26707331178267	0.0249	2	Functional enzyme	misc.peroxidases	AT5G64120.1	Peroxidase superfamily protein	LOC_Os12g08920.1	peroxidase precursor, putative, expressed
RT1/D1W	9449	Pavir.Bb01561.1	30298402	Pavir.Bb01561.1.p|PACid:30298402	0.368	1.29056249045178	0.0043	2	Cell organization	cell.organisation	AT3G23280.2	XB3 ortholog 5 in Arabidopsis thaliana	LOC_Os07g26490.1	ankyrin repeat domain containing protein, expressed
RT1/D1W	9503	Pavir.Ea02542.1	30227863	Pavir.Ea02542.1.p|PACid:30227863	2.3499	5.09788913828198	0.025	2	Abiotic/biotic stress	stress.abiotic.unspecified	AT2G21490.1	dehydrin LEA	LOC_Os01g50700.1	dehydrin family protein, expressed
RT1/D1W	9524	Pavir.Aa00278.1	30249385	Pavir.Aa00278.1.p|PACid:30249385	-0.0723	0.951120475823925	0.1639	2	Cell wall synthesis / modification	cell wall.pectin esterases.acetyl esterase	AT3G10710.1	root hair specific 12	LOC_Os02g54190.1	pectinesterase, putative, expressed
RT1/D1W	9550	Pavir.Cb00226.1	30269347	Pavir.Cb00226.1.p|PACid:30269347	0.4842	1.39880998553736	0.0048	2	Unclassified	not assigned.no ontology	AT2G18900.1	Transducin/WD40 repeat-like superfamily protein	LOC_Os12g41620.1	WD domain, G-beta repeat domain containing protein, expressed
RT1/D1W	9573	Pavir.J03696.1	30257308	Pavir.J03696.1.p|PACid:30257308	0.9618	1.94773850447911	0.106	2	Unclassified	not assigned.unknown	N	N	LOC_Os05g38660.1	expressed protein
RT1/D1W	9577	Pavir.Ia00281.1	30213456	Pavir.Ia00281.1.p|PACid:30213456	0.104	1.0747491728555	0.402	2	Regulation of transcription	RNA.regulation of transcription.GRAS transcription factor family	AT1G07530.1	SCARECROW-like 14	LOC_Os04g50060.1	GRAS family transcription factor domain containing protein, expressed
RT1/D1W	9617	Pavir.Ea02379.1	30229353	Pavir.Ea02379.1.p|PACid:30229353	0.4537	1.36954816081946	0.0151	2	Protein synthesis	protein.synthesis.ribosomal protein.prokaryotic.chloroplast.30S subunit.S20	AT3G15190.1	chloroplast 30S ribosomal protein S20, putative	LOC_Os01g48690.1	ribosomal protein rpS20, putative, expressed
RT1/D1W	9622	Pavir.Fb01303.1	30278099	Pavir.Fb01303.1.p|PACid:30278099	0.4132	1.33163620441731	0.0213	3	Development	development.unspecified	AT5G08290.1	mRNA splicing factor, thioredoxin-like U5 snRNP	LOC_Os07g10256.1	mitosis protein dim1, putative, expressed
RT1/D1W	9676	Pavir.Ab03211.1	30235019	Pavir.Ab03211.1.p|PACid:30235019	-0.09776	0.934482790140119	0.7348	2	Unclassified	not assigned.unknown	AT2G45860.1	N	LOC_Os02g57830.2	expressed protein
RT1/D1W	9736	Pavir.Ba01568.1	30289350	Pavir.Ba01568.1.p|PACid:30289350	0.88334	1.84464091120316	<.0001	2	Regulation of transcription	RNA.regulation of transcription.unclassified	AT5G10770.1	Eukaryotic aspartyl protease family protein	LOC_Os09g30414.1	aspartic proteinase nepenthesin-2 precursor, putative, expressed
RT1/D1W	9787	Pavir.Ia02239.1	30211582	Pavir.Ia02239.1.p|PACid:30211582	-0.2774	0.825076616984559	0.0435	2	Protein modification	protein.postranslational modification	AT2G44680.1	casein kinase II beta subunit 4	LOC_Os10g41520.2	casein kinase II subunit beta-4, putative, expressed
RT1/D1W	9804	Pavir.Db02487.1	30261414	Pavir.Db02487.1.p|PACid:30261414	0.1534	1.11218747861877	0.2949	2	Signaling regulation	signalling.in sugar and nutrient physiology	AT3G29160.3	SNF1 kinase homolog 11	LOC_Os07g09610.1	CAMK_KIN1/SNF1/Nim1_like_AMPKh.1 - CAMK includes calcium/calmodulin depedent protein kinases, expressed
RT1/D1W	9812	Pavir.Da02341.1	30193799	Pavir.Da02341.1.p|PACid:30193799	-0.1857	0.879222371056253	0.2238	2	Unclassified	not assigned.no ontology.pentatricopeptide (PPR) repeat-containing protein	AT5G08510.1	Pentatricopeptide repeat (PPR) superfamily protein	LOC_Os06g03570.2	pentatricopeptide, putative, expressed
RT1/D1W	9826	Pavir.Fa01956.1	30186899	Pavir.Fa01956.1.p|PACid:30186899	-1.2402	0.423313968336697	0.1236	2	Unclassified	not assigned.unknown	AT5G18980.1	ARM repeat superfamily protein	LOC_Os01g43110.1	expressed protein
RT1/D1W	9849	Pavir.Aa03319.1	30251408	Pavir.Aa03319.1.p|PACid:30251408	1.0302	2.04230735570773	0.1298	2	Unclassified	not assigned.unknown	N	N	LOC_Os04g54759.1	expressed protein
RT1/D1W	9886	Pavir.Ib03050.1	30242666	Pavir.Ib03050.1.p|PACid:30242666	-0.01802	0.987587170485219	0.8791	2	Protein synthesis	protein.synthesis.ribosomal protein.prokaryotic.unknown organellar.50S subunit.L35	AT5G45590.1	Ribosomal protein L35	LOC_Os10g42860.1	ribosomal protein L35, putative, expressed
RT1/D1W	3	Pavir.Da02275.1	30192478	Pavir.Da02275.1.p|PACid:30192478	0.27901	1.21336197060383	0.004	9	Glycolysis	glycolysis.cytosolic branch.enolase	AT2G36530.1	Enolase	LOC_Os06g04510.1	enolase, putative, expressed
RT1/D1W	5	Pavir.Cb01141.1	30267585	Pavir.Cb01141.1.p|PACid:30267585	0.332084	1.25883046597335	<.0001	645	Glycolysis	glycolysis.cytosolic branch.enolase	AT2G36530.1	Enolase	LOC_Os10g08550.1	enolase, putative, expressed
RT1/D1W	6	Pavir.Ca01865.1	30204968	Pavir.Ca01865.1.p|PACid:30204968	-0.3156	0.803516748023094	<.0001	70	Glycolysis	glycolysis.cytosolic branch.glyceraldehyde 3-phosphate dehydrogenase (GAP-DH)	AT3G04120.1	glyceraldehyde-3-phosphate dehydrogenase C subunit 1	LOC_Os08g03290.1	glyceraldehyde-3-phosphate dehydrogenase, putative, expressed
RT1/D1W	7	Pavir.Ca00874.1	30205274	Pavir.Ca00874.1.p|PACid:30205274	0.006547	1.00454834706365	0.8928	21	Mitochondrial electron transport / ATP synthesis	mitochondrial electron transport / ATP synthesis.F1-ATPase	AT5G08690.1	ATP synthase alpha/beta family protein	LOC_Os05g47980.1	ATP synthase, putative, expressed
RT1/D1W	8	Pavir.J01466.1	30195685	Pavir.J01466.1.p|PACid:30195685	-0.08504	0.942758396742889	0.0083	21	Mitochondrial electron transport / ATP synthesis	mitochondrial electron transport / ATP synthesis.F1-ATPase	AT5G08690.1	ATP synthase alpha/beta family protein	LOC_Os05g47980.1	ATP synthase, putative, expressed
RT1/D1W	9	Pavir.J09810.1	30258564	Pavir.J09810.1.p|PACid:30258564	0.09903	1.07105309488288	0.0196	35	Mitochondrial electron transport / ATP synthesis	mitochondrial electron transport / ATP synthesis.F1-ATPase	AT5G08670.1	ATP synthase alpha/beta family protein	LOC_Os01g49190.1	ATP synthase, putative, expressed
RT1/D1W	10	Pavir.Ia01683.1	30214544	Pavir.Ia01683.1.p|PACid:30214544	0.09214	1.06595017149898	<.0001	199	TCA cycle	TCA / org transformation.other organic acid transformatons.cyt MDH	AT1G04410.1	Lactate/malate dehydrogenase family protein	LOC_Os10g33800.1	lactate/malate dehydrogenase, putative, expressed
RT1/D1W	11	Pavir.Ib03255.2	30242164	Pavir.Ib03255.2.p|PACid:30242164	0.01343	1.00935242982594	0.5283	154	TCA cycle	TCA / org transformation.other organic acid transformatons.cyt MDH	AT1G04410.1	Lactate/malate dehydrogenase family protein	LOC_Os10g33800.1	lactate/malate dehydrogenase, putative, expressed
RT1/D1W	12	Pavir.Ba00319.1	30289072	Pavir.Ba00319.1.p|PACid:30289072	0.25058	1.18968530254218	<.0001	412	Redox balance	redox.ascorbate and glutathione.ascorbate	AT1G07890.1	ascorbate peroxidase 1	LOC_Os07g49400.1	OsAPx2 - Cytosolic Ascorbate Peroxidase encoding gene 4,5,6,8, expressed
RT1/D1W	13	Pavir.Eb03107.1	30310560	Pavir.Eb03107.1.p|PACid:30310560	-0.01967	0.986458319753935	0.8386	3	Glycolysis	glycolysis.cytosolic branch.glyceraldehyde 3-phosphate dehydrogenase (GAP-DH)	AT1G13440.1	glyceraldehyde-3-phosphate dehydrogenase C2	LOC_Os04g40950.1	glyceraldehyde-3-phosphate dehydrogenase, putative, expressed
RT1/D1W	14	Pavir.Db02274.1	30261237	Pavir.Db02274.1.p|PACid:30261237	-0.02794	0.980819794288838	0.1881	125	Glycolysis	glycolysis.cytosolic branch.enolase	AT2G36530.1	Enolase	LOC_Os06g04510.1	enolase, putative, expressed
RT1/D1W	15	Pavir.Ca01122.1	30206586	Pavir.Ca01122.1.p|PACid:30206586	-0.51586	0.699375905937597	<.0001	35	Protein degradation	protein.degradation.ubiquitin	AT2G47110.1	ubiquitin 6	LOC_Os05g06770.1	40S ribosomal protein S27a, putative, expressed
RT1/D1W	17	Pavir.Eb02272.1	30309159	Pavir.Eb02272.1.p|PACid:30309159	-0.2561	0.837348444925473	0.0231	15	Protein degradation	protein.degradation.ubiquitin	AT2G47110.1	ubiquitin 6	LOC_Os01g22490.1	40S ribosomal protein S27a, putative, expressed
RT1/D1W	18	Pavir.J33226.1	30246818	Pavir.J33226.1.p|PACid:30246818	-0.10629	0.928973919942058	0.2225	17	Regulation of transcription	RNA.regulation of transcription.GRP	AT2G21060.1	glycine-rich protein 2B	LOC_Os02g02870.1	glycine-rich protein 2, putative, expressed
RT1/D1W	19	Pavir.Ab00211.1	30232550	Pavir.Ab00211.1.p|PACid:30232550	-0.05228	0.964410992366607	0.4761	11	Abiotic/biotic stress	stress.abiotic.cold	AT4G36020.1	cold shock domain protein 1	LOC_Os02g02870.1	glycine-rich protein 2, putative, expressed
RT1/D1W	20	Pavir.Da00315.1	30194215	Pavir.Da00315.1.p|PACid:30194215	0.10154	1.07291813436645	0.2742	21	Protein degradation	protein.degradation.ubiquitin	AT1G31340.1	related to ubiquitin 1	LOC_Os06g44080.1	ubiquitin family protein, putative, expressed
RT1/D1W	21	Pavir.Aa03388.1	30249322	Pavir.Aa03388.1.p|PACid:30249322	0.03283	1.02301691541241	0.1782	90	Glycolysis	glycolysis.cytosolic branch.3-phosphoglycerate kinase (PGK)	AT1G79550.1	phosphoglycerate kinase	LOC_Os02g07260.1	phosphoglycerate kinase protein, putative, expressed
RT1/D1W	22	Pavir.Ab00469.1	30233099	Pavir.Ab00469.1.p|PACid:30233099	-0.05229	0.964404307602172	0.0506	60	Glycolysis	glycolysis.cytosolic branch.3-phosphoglycerate kinase (PGK)	AT1G79550.1	phosphoglycerate kinase	LOC_Os02g07260.1	phosphoglycerate kinase protein, putative, expressed
RT1/D1W	23	Pavir.J17765.1	30284099	Pavir.J17765.1.p|PACid:30284099	0.10936	1.07874958171535	<.0001	149	Cell division & Cell cycle	cell.cycle.peptidylprolyl isomerase	AT2G21130.1	Cyclophilin-like peptidyl-prolyl cis-trans isomerase family protein	LOC_Os02g02890.1	peptidyl-prolyl cis-trans isomerase, putative, expressed
RT1/D1W	24	Pavir.J00492.1	30276791	Pavir.J00492.1.p|PACid:30276791	0.09052	1.06475388949957	<.0001	516	Protein synthesis	protein.synthesis.elongation	AT1G07920.1	GTP binding Elongation factor Tu family protein	LOC_Os03g08010.1	elongation factor Tu, putative, expressed
RT1/D1W	26	Pavir.J26645.1	30281877	Pavir.J26645.1.p|PACid:30281877	0.36864	1.29113512929877	<.0001	407	Redox balance	redox.peroxiredoxin	AT1G65970.1	thioredoxin-dependent peroxidase 2	LOC_Os01g48420.1	peroxiredoxin, putative, expressed
RT1/D1W	27	Pavir.Cb00504.1	30269945	Pavir.Cb00504.1.p|PACid:30269945	-0.1346	0.910922359888969	0.0442	38	Abiotic/biotic stress	stress.abiotic.heat	AT3G12580.1	heat shock protein 70	LOC_Os11g47760.1	DnaK family protein, putative, expressed
RT1/D1W	28	Pavir.Aa01886.1	30249319	Pavir.Aa01886.1.p|PACid:30249319	0.43961	1.35623764969019	<.0001	44	Cell division & Cell cycle	cell.cycle.peptidylprolyl isomerase	AT2G21130.1	Cyclophilin-like peptidyl-prolyl cis-trans isomerase family protein	LOC_Os02g02890.1	peptidyl-prolyl cis-trans isomerase, putative, expressed
RT1/D1W	29	Pavir.J38191.1	30190141	Pavir.J38191.1.p|PACid:30190141	0.30667	1.23684953113535	<.0001	197	Redox balance	redox.ascorbate and glutathione.ascorbate	AT1G07890.1	ascorbate peroxidase 1	LOC_Os07g49400.1	OsAPx2 - Cytosolic Ascorbate Peroxidase encoding gene 4,5,6,8, expressed
RT1/D1W	30	Pavir.J00888.1	30275040	Pavir.J00888.1.p|PACid:30275040	0.39545	1.31535297616833	<.0001	18	Abiotic/biotic stress	stress.abiotic.heat	AT5G02500.1	heat shock cognate protein 70-1	LOC_Os03g60620.1	DnaK family protein, putative, expressed
RT1/D1W	31	Pavir.Ea03521.1	30227656	Pavir.Ea03521.1.p|PACid:30227656	0.197	1.14631218572838	<.0001	18	Glycolysis	glycolysis.cytosolic branch.aldolase	AT2G36460.1	Aldolase superfamily protein	LOC_Os05g33380.1	fructose-bisphospate aldolase isozyme, putative, expressed
RT1/D1W	32	Pavir.J38109.1	30258061	Pavir.J38109.1.p|PACid:30258061	0.09855	1.07069680338934	<.0001	128			AT3G23990.1	heat shock protein 60	LOC_Os10g32550.1	T-complex protein, putative, expressed
RT1/D1W	34	Pavir.Ib00835.1	30240728	Pavir.Ib00835.1.p|PACid:30240728	0.07382	1.05249982980501	0.0001	121			AT3G23990.1	heat shock protein 60	LOC_Os10g32550.1	T-complex protein, putative, expressed
RT1/D1W	36	Pavir.Eb04008.1	30314287	Pavir.Eb04008.1.p|PACid:30314287	0.19832	1.14736148892605	0.009	13	Cell organization	cell.organisation	AT5G09810.1	actin 7	LOC_Os05g01600.1	actin, putative, expressed
RT1/D1W	37	Pavir.Ib01258.1	30237909	Pavir.Ib01258.1.p|PACid:30237909	0.05903	1.04176509167907	0.8537	5	Abiotic/biotic stress	stress.abiotic.heat	AT3G12580.1	heat shock protein 70	LOC_Os03g16860.1	DnaK family protein, putative, expressed
RT1/D1W	38	Pavir.Db01268.1	30263221	Pavir.Db01268.1.p|PACid:30263221	0.30934	1.23914069171355	<.0001	143	Transport	transport.p- and v-ATPases.H+-transporting two-sector ATPase.subunit B	AT4G38510.5	ATPase, V1 complex, subunit B protein	LOC_Os06g37180.1	ATP synthase, putative, expressed
RT1/D1W	39	Pavir.J07576.1	30308383	Pavir.J07576.1.p|PACid:30308383	1.43522	2.70423400969529	<.0001	29	Glycolysis	glycolysis.cytosolic branch.3-phosphoglycerate kinase (PGK)	AT1G79550.1	phosphoglycerate kinase	LOC_Os06g45710.1	phosphoglycerate kinase protein, putative, expressed
RT1/D1W	41	Pavir.Eb03667.1	30309961	Pavir.Eb03667.1.p|PACid:30309961	1.4667	2.76388961860771	<.0001	13	Abiotic/biotic stress	stress.abiotic.heat	AT3G12580.1	heat shock protein 70	LOC_Os01g62290.1	DnaK family protein, putative, expressed
RT1/D1W	43	Pavir.J13866.1	30286882	Pavir.J13866.1.p|PACid:30286882	1.31417	2.48659232820373	<.0001	93	Glycolysis	glycolysis.cytosolic branch.3-phosphoglycerate kinase (PGK)	AT1G79550.1	phosphoglycerate kinase	LOC_Os06g45710.1	phosphoglycerate kinase protein, putative, expressed
RT1/D1W	44	Pavir.J02847.1	30218796	Pavir.J02847.1.p|PACid:30218796	0.699	1.62337916195456	0.0188	2	Abiotic/biotic stress	stress.abiotic.heat	AT3G12580.1	heat shock protein 70	LOC_Os05g38530.1	DnaK family protein, putative, expressed
RT1/D1W	46	Pavir.Ia00051.1	30211338	Pavir.Ia00051.1.p|PACid:30211338	-0.19761	0.871993931531316	<.0001	37	Calvin cycle	PS.calvin cycle.rubisco interacting	AT2G28000.1	chaperonin-60alpha	LOC_Os03g64210.1	T-complex protein, putative, expressed
RT1/D1W	47	Pavir.J06306.1	30275689	Pavir.J06306.1.p|PACid:30275689	0.05504	1.0388879069873	0.1132	68	Glycolysis	glycolysis.cytosolic branch.aldolase	AT2G36460.1	Aldolase superfamily protein	LOC_Os05g33380.1	fructose-bisphospate aldolase isozyme, putative, expressed
RT1/D1W	48	Pavir.Hb01957.1	30264591	Pavir.Hb01957.1.p|PACid:30264591	-0.01303	0.991008955597913	0.3353	339	Protein synthesis	protein.synthesis.ribosomal protein.eukaryotic.60S subunit.L17	AT1G27400.1	Ribosomal protein L22p/L17e family protein	LOC_Os09g08430.1	ribosomal protein L22, putative, expressed
RT1/D1W	49	Pavir.Ia03665.1	30210947	Pavir.Ia03665.1.p|PACid:30210947	2.0528	4.14910451837186	<.0001	21	Abiotic/biotic stress	stress.abiotic.heat	AT5G02500.1	heat shock cognate protein 70-1	LOC_Os03g16920.1	DnaK family protein, putative, expressed
RT1/D1W	50	Pavir.Ca00978.2	30203257	Pavir.Ca00978.2.p|PACid:30203257	0.14955	1.10922343331016	0.0006	36	TCA cycle	TCA / org transformation.TCA.malate DH	AT1G53240.1	Lactate/malate dehydrogenase family protein	LOC_Os01g46070.1	lactate/malate dehydrogenase, putative, expressed
RT1/D1W	51	Pavir.J08443.1	30277698	Pavir.J08443.1.p|PACid:30277698	0.20188	1.15019621873973	0.0009	26	TCA cycle	TCA / org transformation.TCA.malate DH	AT1G53240.1	Lactate/malate dehydrogenase family protein	LOC_Os01g46070.1	lactate/malate dehydrogenase, putative, expressed
RT1/D1W	52	Pavir.Ib04451.1	30241914	Pavir.Ib04451.1.p|PACid:30241914	0.09221	1.06600189297866	0.2173	13	Calvin cycle	PS.calvin cycle.rubisco interacting	AT2G28000.1	chaperonin-60alpha	LOC_Os03g64210.1	T-complex protein, putative, expressed
RT1/D1W	54	Pavir.Ab00063.1	30233834	Pavir.Ab00063.1.p|PACid:30233834	0.03091	1.02165634648684	0.7995	3	Protein synthesis	protein.synthesis.ribosomal protein.eukaryotic.60S subunit.L9	AT1G33140.1	Ribosomal protein L6 family	LOC_Os09g31180.1	ribosomal protein L6, putative, expressed
RT1/D1W	55	Pavir.Eb00605.1	30309294	Pavir.Eb00605.1.p|PACid:30309294	-0.03604	0.975328419307	0.3283	40	Mitochondrial electron transport / ATP synthesis	mitochondrial electron transport / ATP synthesis.F1-ATPase	AT5G08680.1	ATP synthase alpha/beta family protein	LOC_Os05g47980.1	ATP synthase, putative, expressed
RT1/D1W	56	Pavir.J03393.1	30196500	Pavir.J03393.1.p|PACid:30196500	-0.17087	0.888306836795462	<.0001	32	Abiotic/biotic stress	stress.abiotic.heat	AT5G42020.1	Heat shock protein 70 (Hsp 70) family protein	LOC_Os02g02410.1	DnaK family protein, putative, expressed
RT1/D1W	57	Pavir.J10928.1	30314682	Pavir.J10928.1.p|PACid:30314682	0.51027	1.4243167311594	<.0001	120	Cell division & Cell cycle	cell.cycle.peptidylprolyl isomerase	AT2G21130.1	Cyclophilin-like peptidyl-prolyl cis-trans isomerase family protein	LOC_Os02g02890.1	peptidyl-prolyl cis-trans isomerase, putative, expressed
RT1/D1W	59	Pavir.Ab00168.1	30235837	Pavir.Ab00168.1.p|PACid:30235837	-0.24659	0.842886335626575	0.0012	12	Abiotic/biotic stress	stress.abiotic.heat	AT5G42020.1	Heat shock protein 70 (Hsp 70) family protein	LOC_Os02g02410.1	DnaK family protein, putative, expressed
RT1/D1W	60	Pavir.Ba01388.2	30288499	Pavir.Ba01388.2.p|PACid:30288499	0.2093	1.15612709143076	<.0001	48	Glycolysis	glycolysis.cytosolic branch.UGPase	AT5G17310.2	UDP-glucose pyrophosphorylase 2	LOC_Os09g38030.1	UTP--glucose-1-phosphate uridylyltransferase, putative, expressed
RT1/D1W	61	Pavir.Aa03564.1	30251687	Pavir.Aa03564.1.p|PACid:30251687	-0.02763	0.981030571200702	0.8095	18	Protein synthesis	protein.synthesis.ribosomal protein.eukaryotic.60S subunit.L9	AT1G33140.1	Ribosomal protein L6 family	LOC_Os09g31180.1	ribosomal protein L6, putative, expressed
RT1/D1W	62	Pavir.Aa02915.1	30252182	Pavir.Aa02915.1.p|PACid:30252182	0.2124	1.15861399767633	0.162	3	Transport	transport.p- and v-ATPases.H+-transporting two-sector ATPase.subunit B	AT4G38510.5	ATPase, V1 complex, subunit B protein	LOC_Os06g37180.1	ATP synthase, putative, expressed
RT1/D1W	63	Pavir.Eb03089.1	30309742	Pavir.Eb03089.1.p|PACid:30309742	0.26954	1.2054234199216	0.0003	15	Protein synthesis	protein.synthesis.elongation	AT1G56070.1	Ribosomal protein S5/Elongation factor G/III/V family protein	LOC_Os04g02820.1	elongation factor, putative, expressed
RT1/D1W	64	Pavir.Ia03444.1	30214087	Pavir.Ia03444.1.p|PACid:30214087	1.47034	2.77087187076874	<.0001	43	Unclassified	not assigned.no ontology.hydroxyproline rich proteins	AT2G39050.1	hydroxyproline-rich glycoprotein family protein	LOC_Os03g21040.2	stress responsive protein, putative, expressed
RT1/D1W	65	Pavir.Db00828.1	30260773	Pavir.Db00828.1.p|PACid:30260773	0.76129	1.69500555326313	<.0001	59	Redox balance	redox.peroxiredoxin	AT3G52960.1	Thioredoxin superfamily protein	LOC_Os06g42000.1	peroxiredoxin, putative, expressed
RT1/D1W	66	Pavir.Fa00889.1	30187351	Pavir.Fa00889.1.p|PACid:30187351	0.2029	1.15100970664937	<.0001	33	TCA cycle	TCA / org transformation.other organic acid transformatons.cyt MDH	AT3G47520.1	malate dehydrogenase	LOC_Os08g33720.1	lactate/malate dehydrogenase, putative, expressed
RT1/D1W	67	Pavir.J01004.1	30220128	Pavir.J01004.1.p|PACid:30220128	0.8801	1.84050287076604	<.0001	6	Cell organization	cell.organisation	AT5G09810.1	actin 7	LOC_Os01g64630.1	actin, putative, expressed
RT1/D1W	69	Pavir.Db00844.1	30261441	Pavir.Db00844.1.p|PACid:30261441	0.86157	1.81701458501033	<.0001	32	Redox balance	redox.peroxiredoxin	AT3G52960.1	Thioredoxin superfamily protein	LOC_Os06g42000.1	peroxiredoxin, putative, expressed
RT1/D1W	70	Pavir.J21269.1	30207616	Pavir.J21269.1.p|PACid:30207616	0.02596	1.01815697006795	0.6219	11	Protein synthesis	protein.synthesis.ribosomal protein.eukaryotic.60S subunit.L9	AT1G33140.1	Ribosomal protein L6 family	LOC_Os09g31180.1	ribosomal protein L6, putative, expressed
RT1/D1W	71	Pavir.J34899.1	30191211	Pavir.J34899.1.p|PACid:30191211	0.02581	1.01805111567602	0.5006	42	TCA cycle	TCA / org transformation.other organic acid transformatons.cyt MDH	AT3G47520.1	malate dehydrogenase	LOC_Os08g33720.1	lactate/malate dehydrogenase, putative, expressed
RT1/D1W	72	Pavir.Ab01424.1	30234285	Pavir.Ab01424.1.p|PACid:30234285	0.28278	1.2165368318922	<.0001	64	Glycolysis	glycolysis.cytosolic branch.aldolase	AT2G36460.1	Aldolase superfamily protein	LOC_Os05g33380.1	fructose-bisphospate aldolase isozyme, putative, expressed
RT1/D1W	73	Pavir.J10341.1	30191141	Pavir.J10341.1.p|PACid:30191141	-0.61989	0.650720540791439	<.0001	9	Metal binding	metal handling.binding, chelation and storage	AT3G17390.1	S-adenosylmethionine synthetase family protein	LOC_Os05g04510.1	S-adenosylmethionine synthetase, putative, expressed
RT1/D1W	74	Pavir.J33349.1	30287410	Pavir.J33349.1.p|PACid:30287410	-0.31911	0.801564210852388	<.0001	187	Abiotic/biotic stress	stress.abiotic.cold	AT4G36020.1	cold shock domain protein 1	LOC_Os02g02870.1	glycine-rich protein 2, putative, expressed
RT1/D1W	75	Pavir.J14626.1	30190823	Pavir.J14626.1.p|PACid:30190823	0.10567	1.07599397531014	0.1767	9	Calvin cycle	PS.calvin cycle.phosphoglycerate kinase	AT1G56190.1	Phosphoglycerate kinase family protein	LOC_Os05g41640.1	phosphoglycerate kinase protein, putative, expressed
RT1/D1W	76	Pavir.Ia03444.2	30214088	Pavir.Ia03444.2.p|PACid:30214088	1.4022	2.64304318950752	<.0001	12	Unclassified	not assigned.no ontology.hydroxyproline rich proteins	AT2G39050.1	hydroxyproline-rich glycoprotein family protein	LOC_Os03g21040.2	stress responsive protein, putative, expressed
RT1/D1W	77	Pavir.Ga00684.1	30305937	Pavir.Ga00684.1.p|PACid:30305937	0.1267	1.0917934900652	<.0001	155	Protein synthesis	protein.synthesis.ribosomal protein.eukaryotic.60S subunit.L12	AT3G53430.1	Ribosomal protein L11 family protein	LOC_Os02g47140.1	L11 domain containing ribosomal protein, putative, expressed
RT1/D1W	78	Pavir.J00566.1	30188858	Pavir.J00566.1.p|PACid:30188858	0.42885	1.34616009893883	<.0001	7	Calvin cycle	PS.calvin cycle.phosphoglycerate kinase	AT1G56190.1	Phosphoglycerate kinase family protein	LOC_Os05g41640.1	phosphoglycerate kinase protein, putative, expressed
RT1/D1W	79	Pavir.J40820.1	30196071	Pavir.J40820.1.p|PACid:30196071	0.1134	1.08177465352855	0.1642	8	Cell organization	cell.organisation	AT5G09810.1	actin 7	LOC_Os05g01600.1	actin, putative, expressed
RT1/D1W	80	Pavir.Ab01333.3	30234571	Pavir.Ab01333.3.p|PACid:30234571	-0.6606	0.632615145025529	<.0001	99	Metal binding	metal handling.binding, chelation and storage	AT3G56240.1	copper chaperone	LOC_Os02g32814.1	heavy metal-associated domain containing protein, expressed
RT1/D1W	81	Pavir.Ab03008.1	30235676	Pavir.Ab03008.1.p|PACid:30235676	0.04326	1.03043964093373	0.0469	86			AT5G04430.2	binding to TOMV RNA 1L (long form)	LOC_Os02g57640.1	KH domain containing protein, putative, expressed
RT1/D1W	85	Pavir.Fa01807.1	30186336	Pavir.Fa01807.1.p|PACid:30186336	0.44612	1.36237134879093	<.0001	145	TCA cycle	TCA / org transformation.TCA.aconitase	AT2G05710.1	aconitase 3	LOC_Os08g09200.1	aconitate hydratase protein, putative, expressed
RT1/D1W	88	Pavir.Ia01108.1	30210813	Pavir.Ia01108.1.p|PACid:30210813	0.45477	1.37056428692428	<.0001	13	Amino acid metabolism	amino acid metabolism.synthesis.aspartate family.methionine	AT5G17920.1	Cobalamin-independent synthase family protein	LOC_Os12g42876.1	5-methyltetrahydropteroyltriglutamate--homocysteine methyltransferase, putative, expressed
RT1/D1W	89	Pavir.Db02438.1	30261934	Pavir.Db02438.1.p|PACid:30261934	0.35978	1.28323019981517	<.0001	5	Pentose phosphate pathway	OPP.oxidative PP.6-phosphogluconate dehydrogenase	AT3G02360.1	6-phosphogluconate dehydrogenase family protein	LOC_Os06g02144.1	6-phosphogluconate dehydrogenase, decarboxylating, putative, expressed
RT1/D1W	90	Pavir.Ib00734.1	30241077	Pavir.Ib00734.1.p|PACid:30241077	0.07388	1.05254360295262	0.0309	58	Protein targeting & vesicle tansport	protein.targeting.mitochondria	AT3G02090.1	Insulinase (Peptidase family M16) protein	LOC_Os03g11410.1	mitochondrial-processing peptidase subunit, mitochondrial precursor, putative, expressed
RT1/D1W	91	Pavir.Ia04676.1	30212033	Pavir.Ia04676.1.p|PACid:30212033	0.1757	1.12951231466504	<.0001	48	Protein targeting & vesicle tansport	protein.targeting.mitochondria	AT3G02090.1	Insulinase (Peptidase family M16) protein	LOC_Os03g11410.1	mitochondrial-processing peptidase subunit, mitochondrial precursor, putative, expressed
RT1/D1W	92	Pavir.Aa01274.1	30249038	Pavir.Aa01274.1.p|PACid:30249038	0.14329	1.1044208274449	<.0001	67	Secondary metabolism	secondary metabolism.phenylpropanoids.lignin biosynthesis.PAL	AT2G37040.1	PHE ammonia lyase 1	LOC_Os02g41630.2	phenylalanine ammonia-lyase, putative, expressed
RT1/D1W	93	Pavir.Ea00483.1	30230738	Pavir.Ea00483.1.p|PACid:30230738	0.17487	1.12886267938516	0.0022	24	DNA synthesis	DNA.synthesis/chromatin structure.histone.core.H2B	AT5G59910.1	Histone superfamily protein	LOC_Os01g05610.1	Core histone H2A/H2B/H3/H4 domain containing protein, putative, expressed
RT1/D1W	94	Pavir.J34168.1	30195400	Pavir.J34168.1.p|PACid:30195400	0.39444	1.31443244788808	<.0001	61	Redox balance	redox.ascorbate and glutathione.ascorbate	AT1G07890.1	ascorbate peroxidase 1	LOC_Os03g17690.1	OsAPx1 - Cytosolic Ascorbate Peroxidase encoding gene 1-8, expressed
RT1/D1W	95	Pavir.Eb00736.1	30314106	Pavir.Eb00736.1.p|PACid:30314106	0.43285	1.34989762616612	<.0001	59	Glycolysis	glycolysis.cytosolic branch.triosephosphate isomerase (TPI)	AT3G55440.1	triosephosphate isomerase	LOC_Os01g05490.1	triosephosphate isomerase, cytosolic, putative, expressed
RT1/D1W	96	Pavir.Hb01466.1	30264706	Pavir.Hb01466.1.p|PACid:30264706	0.5136	1.42760810779416	0.0002	5	Protein synthesis	protein.synthesis.ribosomal protein.eukaryotic.40S subunit.S5	AT2G37270.1	ribosomal protein 5B	LOC_Os11g29190.2	40S ribosomal protein S5, putative, expressed
RT1/D1W	97	Pavir.Ib01329.1	30240568	Pavir.Ib01329.1.p|PACid:30240568	0.45792	1.37356006497489	<.0001	78	Redox balance	redox.ascorbate and glutathione.ascorbate	AT1G07890.1	ascorbate peroxidase 1	LOC_Os03g17690.1	OsAPx1 - Cytosolic Ascorbate Peroxidase encoding gene 1-8, expressed
RT1/D1W	98	Pavir.Ib03330.1	30240420	Pavir.Ib03330.1.p|PACid:30240420	-0.09439	0.936668205563871	0.2002	19	Cell division & Cell cycle	cell.division	AT5G03340.1	ATPase, AAA-type, CDC48 protein	LOC_Os10g30580.1	cell division control protein 48 homolog E, putative, expressed
RT1/D1W	99	Pavir.Cb00079.1	30268421	Pavir.Cb00079.1.p|PACid:30268421	0.12465	1.09024320592775	0.0008	55	Amino acid metabolism	amino acid metabolism.synthesis.aspartate family.methionine	AT5G17920.1	Cobalamin-independent synthase family protein	LOC_Os12g42884.1	5-methyltetrahydropteroyltriglutamate--homocysteine methyltransferase, putative, expressed
RT1/D1W	100	Pavir.Ia00744.1	30214876	Pavir.Ia00744.1.p|PACid:30214876	-0.19255	0.875057667031937	0.0222	9	Cell organization	cell.organisation	AT4G14960.2	Tubulin/FtsZ family protein	LOC_Os11g14220.1	tubulin/FtsZ domain containing protein, putative, expressed
RT1/D1W	101	Pavir.Ib03660.1	30238462	Pavir.Ib03660.1.p|PACid:30238462	0.074	1.05263115470944	0.3015	15	Abiotic/biotic stress	stress.abiotic.heat	AT5G09590.1	mitochondrial HSO70 2	LOC_Os03g02260.1	DnaK family protein, putative, expressed
RT1/D1W	102	Pavir.J04569.1	30247014	Pavir.J04569.1.p|PACid:30247014	0.3519	1.2762403035262	0.0479	3	DNA synthesis	DNA.synthesis/chromatin structure.histone.core.H2B	AT5G59910.1	Histone superfamily protein	LOC_Os01g05900.1	Core histone H2A/H2B/H3/H4 domain containing protein, putative, expressed
RT1/D1W	103	Pavir.Cb00841.1	30269220	Pavir.Cb00841.1.p|PACid:30269220	-0.13512	0.910594089354827	0.0002	94			AT5G61030.1	glycine-rich RNA-binding protein 3	LOC_Os12g31800.1	glycine-rich RNA-binding protein 7, putative, expressed
RT1/D1W	104	Pavir.Bb02554.1	30298616	Pavir.Bb02554.1.p|PACid:30298616	0.173	1.12740041214542	<.0001	34	Glycolysis	glycolysis.cytosolic branch.UGPase	AT5G17310.2	UDP-glucose pyrophosphorylase 2	LOC_Os09g38030.1	UTP--glucose-1-phosphate uridylyltransferase, putative, expressed
RT1/D1W	105	Pavir.Ea00503.1	30230338	Pavir.Ea00503.1.p|PACid:30230338	0.28592	1.21918748609234	<.0001	23	Glycolysis	glycolysis.cytosolic branch.triosephosphate isomerase (TPI)	AT3G55440.1	triosephosphate isomerase	LOC_Os01g05490.1	triosephosphate isomerase, cytosolic, putative, expressed
RT1/D1W	108	Pavir.Ib04093.1	30237518	Pavir.Ib04093.1.p|PACid:30237518	-0.2362	0.84897854487163	<.0001	137			AT2G21660.1	cold, circadian rhythm, and rna binding 2	LOC_Os03g46770.1	RNA recognition motif containing protein, expressed
RT1/D1W	109	Pavir.Eb01268.1	30313696	Pavir.Eb01268.1.p|PACid:30313696	-0.50094	0.706646209919938	<.0001	34	Metal binding	metal handling.binding, chelation and storage	AT3G17390.1	S-adenosylmethionine synthetase family protein	LOC_Os01g22010.1	S-adenosylmethionine synthetase, putative, expressed
RT1/D1W	110	Pavir.J00824.1	30273961	Pavir.J00824.1.p|PACid:30273961	-0.2239	0.856247633052842	0.3403	2	Cell organization	cell.organisation	AT1G50010.1	tubulin alpha-2 chain	LOC_Os11g14220.1	tubulin/FtsZ domain containing protein, putative, expressed
RT1/D1W	111	Pavir.J25865.1	30216197	Pavir.J25865.1.p|PACid:30216197	0.03882	1.02727326210126	0.4975	16	Protein synthesis	protein.synthesis.ribosomal protein.eukaryotic.60S subunit.L4/L1	AT3G09630.1	Ribosomal protein L4/L1 family	LOC_Os07g08330.1	ribosomal protein L4, putative, expressed
RT1/D1W	112	Pavir.Ba02489.1	30292126	Pavir.Ba02489.1.p|PACid:30292126	0.01031	1.00717194350887	0.8704	17	RNA processing	RNA.processing	AT1G49760.1	poly(A) binding protein 8	LOC_Os09g02700.1	polyadenylate-binding protein, putative, expressed
RT1/D1W	113	Pavir.J05441.2	30201370	Pavir.J05441.2.p|PACid:30201370	-0.11422	0.923881676788863	<.0001	107	TCA cycle	TCA / org transformation.TCA.pyruvate DH.E3	AT3G16950.2	lipoamide dehydrogenase 1	LOC_Os05g06460.1	dihydrolipoyl dehydrogenase, putative, expressed
RT1/D1W	115	Pavir.Hb00841.1	30264873	Pavir.Hb00841.1.p|PACid:30264873	0.26621	1.20264429415335	<.0001	159	Pentose phosphate pathway	OPP.oxidative PP.6-phosphogluconate dehydrogenase	AT5G41670.1	6-phosphogluconate dehydrogenase family protein	LOC_Os11g29400.1	6-phosphogluconate dehydrogenase, decarboxylating, putative, expressed
RT1/D1W	116	Pavir.Ea03240.1	30230349	Pavir.Ea03240.1.p|PACid:30230349	0.20927	1.1561030506937	0.0042	15	Glycolysis	glycolysis.cytosolic branch.phosphoglycerate mutase	AT3G08590.1	Phosphoglycerate mutase, 2,3-bisphosphoglycerate-independent	LOC_Os01g60190.1	2,3-bisphosphoglycerate-independent phosphoglycerate mutase, putative, expressed
RT1/D1W	117	Pavir.Da02386.1	30192822	Pavir.Da02386.1.p|PACid:30192822	0.15217	1.11123966388936	0.0038	22			AT3G13470.1	TCP-1/cpn60 chaperonin family protein	LOC_Os06g02380.1	T-complex protein, putative, expressed
RT1/D1W	118	Pavir.Bb01666.1	30299673	Pavir.Bb01666.1.p|PACid:30299673	0.21174	1.15808407948124	0.0003	22	RNA processing	RNA.processing	AT1G49760.1	poly(A) binding protein 8	LOC_Os09g02700.1	polyadenylate-binding protein, putative, expressed
RT1/D1W	120	Pavir.Eb03550.1	30311899	Pavir.Eb03550.1.p|PACid:30311899	-0.2491	0.841421157393726	0.2934	2	Glycolysis	glycolysis.cytosolic branch.phosphoglycerate mutase	AT3G08590.1	Phosphoglycerate mutase, 2,3-bisphosphoglycerate-independent	LOC_Os01g60190.1	2,3-bisphosphoglycerate-independent phosphoglycerate mutase, putative, expressed
RT1/D1W	121	Pavir.Ba00168.1	30290826	Pavir.Ba00168.1.p|PACid:30290826	0.88657	1.8487754405024	<.0001	143	Functional enzyme	misc.peroxidases	AT5G05340.1	Peroxidase superfamily protein	LOC_Os07g48030.1	peroxidase precursor, putative, expressed
RT1/D1W	122	Pavir.Cb00592.1	30270091	Pavir.Cb00592.1.p|PACid:30270091	0.24434	1.18455074208344	<.0001	32	Abiotic/biotic stress	stress.abiotic.unspecified	AT1G70840.1	MLP-like protein 31	LOC_Os12g36830.1	pathogenesis-related Bet v I family protein, putative, expressed
RT1/D1W	123	Pavir.Ea03881.1	30231562	Pavir.Ea03881.1.p|PACid:30231562	0.4916	1.40600331897208	0.0004	4	Pentose phosphate pathway	OPP.non-reductive PP.transaldolase	AT5G13420.1	Aldolase-type TIM barrel family protein	LOC_Os01g70170.1	transaldolase, putative, expressed
RT1/D1W	124	Pavir.Ab02342.1	30235216	Pavir.Ab02342.1.p|PACid:30235216	0.26075	1.19810138820008	0.004	9	Nucleotide metabolism	nucleotide metabolism.salvage.nucleoside kinases.adenosine kinase	AT5G03300.1	adenosine kinase 2	LOC_Os02g41590.1	kinase, pfkB family, putative, expressed
RT1/D1W	125	Pavir.J05681.1	30185183	Pavir.J05681.1.p|PACid:30185183	0.7653	1.69972340907779	0.0006	2	Pentose phosphate pathway	OPP.non-reductive PP.transaldolase	AT5G13420.1	Aldolase-type TIM barrel family protein	LOC_Os01g70170.1	transaldolase, putative, expressed
RT1/D1W	130	Pavir.Ib04158.1	30238750	Pavir.Ib04158.1.p|PACid:30238750	0.09896	1.0710011283233	0.1323	14	Amino acid metabolism	amino acid metabolism.synthesis.aspartate family.methionine	AT5G17920.1	Cobalamin-independent synthase family protein	LOC_Os12g42876.1	5-methyltetrahydropteroyltriglutamate--homocysteine methyltransferase, putative, expressed
RT1/D1W	131	Pavir.J18635.1	30199985	Pavir.J18635.1.p|PACid:30199985	-0.634	0.644387315242508	<.0001	5	Cell organization	cell.organisation	AT3G12110.1	actin-11	LOC_Os03g50885.1	actin, putative, expressed
RT1/D1W	133	Pavir.Hb00026.1	30265734	Pavir.Hb00026.1.p|PACid:30265734	0.27927	1.2135806603007	<.0001	99			AT5G01410.1	Aldolase-type TIM barrel family protein	LOC_Os07g01020.1	SOR/SNZ family protein, putative, expressed
RT1/D1W	134	Pavir.Fb00274.1	30278272	Pavir.Fb00274.1.p|PACid:30278272	-0.01139	0.992136136848698	0.6508	92	Protein synthesis	protein.synthesis.ribosomal protein.eukaryotic.40S subunit.S3	AT5G35530.1	Ribosomal protein S3 family protein	LOC_Os03g38000.1	40S ribosomal protein S3-1, putative, expressed
RT1/D1W	135	Pavir.Aa03362.1	30253499	Pavir.Aa03362.1.p|PACid:30253499	-0.3527	0.783117123954377	0.2001	2	Transport	transport.p- and v-ATPases	AT1G78900.1	vacuolar ATP synthase subunit A	LOC_Os06g45120.1	ATP synthase, putative, expressed
RT1/D1W	136	Pavir.J04613.1	30281846	Pavir.J04613.1.p|PACid:30281846	0.01223	1.00851322314146	0.942	3	Abiotic/biotic stress	stress.abiotic.heat	AT5G09590.1	mitochondrial HSO70 2	LOC_Os03g02260.1	DnaK family protein, putative, expressed
RT1/D1W	137	Pavir.J24845.1	30307315	Pavir.J24845.1.p|PACid:30307315	0.23037	1.17313577828439	0.0105	10	Transport	transport.p- and v-ATPases	AT1G78900.1	vacuolar ATP synthase subunit A	LOC_Os06g45120.1	ATP synthase, putative, expressed
RT1/D1W	139	Pavir.J00076.1	30281391	Pavir.J00076.1.p|PACid:30281391	0.35556	1.27948213178212	<.0001	24	TCA cycle	TCA / org transformation.TCA.pyruvate DH.E3	AT1G48030.1	mitochondrial lipoamide dehydrogenase 1	LOC_Os05g06750.1	dihydrolipoyl dehydrogenase, mitochondrial precursor, putative, expressed
RT1/D1W	142	Pavir.Db01054.1	30259926	Pavir.Db01054.1.p|PACid:30259926	0.34783	1.27264496429449	<.0001	173			AT5G26360.1	TCP-1/cpn60 chaperonin family protein	LOC_Os06g34690.1	T-complex protein, putative, expressed
RT1/D1W	143	Pavir.Ia04204.1	30212873	Pavir.Ia04204.1.p|PACid:30212873	0.44017	1.35676419236533	<.0001	34	Cell division & Cell cycle	cell.division	AT5G03340.1	ATPase, AAA-type, CDC48 protein	LOC_Os03g05730.1	cell division control protein 48 homolog E, putative, expressed
RT1/D1W	144	Pavir.Ea02008.1	30227917	Pavir.Ea02008.1.p|PACid:30227917	-0.1737	0.886566036252819	0.1868	7	Glycolysis	glycolysis.cytosolic branch.phosphoglycerate mutase	AT3G08590.1	Phosphoglycerate mutase, 2,3-bisphosphoglycerate-independent	LOC_Os01g60190.1	2,3-bisphosphoglycerate-independent phosphoglycerate mutase, putative, expressed
RT1/D1W	145	Pavir.Ia00869.1	30209772	Pavir.Ia00869.1.p|PACid:30209772	0.36618	1.28893543640667	0.0007	5	Mitochondrial electron transport / ATP synthesis	mitochondrial electron transport / ATP synthesis.NADH-DH.localisation not clear	AT5G37510.1	NADH-ubiquinone dehydrogenase, mitochondrial, putative	LOC_Os03g50540.1	2Fe-2S iron-sulfur cluster binding domain containing protein, expressed
RT1/D1W	147	Pavir.Db02317.1	30262064	Pavir.Db02317.1.p|PACid:30262064	0.15446	1.11300494308425	<.0001	58	Calvin cycle / Pentose phosphate pathway	PS.calvin cycle.transketolase / OPP.non-reductive PP.transketolase	AT2G45290.1	Transketolase	LOC_Os06g04270.1	transketolase, chloroplast precursor, putative, expressed
RT1/D1W	148	Pavir.Ca01124.1	30205665	Pavir.Ca01124.1.p|PACid:30205665	0.39672	1.31651138713905	<.0001	22	TCA cycle	TCA / org transformation.TCA.pyruvate DH.E3	AT1G48030.1	mitochondrial lipoamide dehydrogenase 1	LOC_Os05g06750.1	dihydrolipoyl dehydrogenase, mitochondrial precursor, putative, expressed
RT1/D1W	149	Pavir.Ba01876.1	30289301	Pavir.Ba01876.1.p|PACid:30289301	-0.1593	0.89545944517241	0.1652	5	Abiotic/biotic stress	stress.abiotic.heat	AT5G09590.1	mitochondrial HSO70 2	LOC_Os03g02260.1	DnaK family protein, putative, expressed
RT1/D1W	150	Pavir.J03225.1	30245570	Pavir.J03225.1.p|PACid:30245570	0.06298	1.04462128123794	0.5268	3	Mitochondrial electron transport / ATP synthesis	mitochondrial electron transport / ATP synthesis.NADH-DH.localisation not clear	AT5G37510.2	NADH-ubiquinone dehydrogenase, mitochondrial, putative	LOC_Os03g50540.1	2Fe-2S iron-sulfur cluster binding domain containing protein, expressed
RT1/D1W	152	Pavir.Bb00018.1	30296785	Pavir.Bb00018.1.p|PACid:30296785	0.32918	1.25629911539989	<.0001	81			AT5G01410.1	Aldolase-type TIM barrel family protein	LOC_Os07g01020.1	SOR/SNZ family protein, putative, expressed
RT1/D1W	153	Pavir.Eb01515.1	30310895	Pavir.Eb01515.1.p|PACid:30310895	0.58987	1.50511111704185	<.0001	40	Functional enzyme	misc.misc2	AT2G32520.1	alpha/beta-Hydrolases superfamily protein	LOC_Os01g34700.1	dienelactone hydrolase family protein, expressed
RT1/D1W	155	Pavir.Fb00524.1	30278626	Pavir.Fb00524.1.p|PACid:30278626	0.44249	1.35894776207271	<.0001	66	TCA cycle	TCA / org transformation.TCA.aconitase	AT2G05710.1	aconitase 3	LOC_Os08g09200.1	aconitate hydratase protein, putative, expressed
RT1/D1W	156	Pavir.Ba01698.1	30291323	Pavir.Ba01698.1.p|PACid:30291323	-0.7922	0.577462833380693	<.0001	10	Abiotic/biotic stress	stress.abiotic.heat	AT5G09590.1	mitochondrial HSO70 2	LOC_Os09g31486.1	DnaK family protein, putative, expressed
RT1/D1W	157	Pavir.Da02287.1	30193345	Pavir.Da02287.1.p|PACid:30193345	0.14997	1.1095463994592	0.0001	49	Calvin cycle / Pentose phosphate pathway	PS.calvin cycle.transketolase / OPP.non-reductive PP.transketolase	AT2G45290.1	Transketolase	LOC_Os06g04270.1	transketolase, chloroplast precursor, putative, expressed
RT1/D1W	158	Pavir.Fb00620.1	30278273	Pavir.Fb00620.1.p|PACid:30278273	1.39847	2.63621858870639	<.0001	73	Amino acid metabolism	amino acid metabolism.degradation.aspartate family.threonine	AT1G11840.6	glyoxalase I homolog	LOC_Os08g09250.2	glyoxalase family protein, putative, expressed
RT1/D1W	159	Pavir.J15325.1	30282174	Pavir.J15325.1.p|PACid:30282174	0.05353	1.03780112147206	0.608	5	Protein synthesis	protein.synthesis.ribosomal protein.eukaryotic.60S subunit.L4/L1	AT3G09630.1	Ribosomal protein L4/L1 family	LOC_Os07g08330.1	ribosomal protein L4, putative, expressed
RT1/D1W	160	Pavir.Fb02222.1	30279249	Pavir.Fb02222.1.p|PACid:30279249	0.95531	1.93899623213926	<.0001	73	Redox balance	redox.dismutases and catalases	AT2G28190.1	copper/zinc superoxide dismutase 2	LOC_Os08g44770.1	copper/zinc superoxide dismutase, putative, expressed
RT1/D1W	161	Pavir.J01963.1	30218288	Pavir.J01963.1.p|PACid:30218288	-0.8721	0.546350998072575	<.0001	12	Abiotic/biotic stress	stress.abiotic.heat	AT5G09590.1	mitochondrial HSO70 2	LOC_Os09g31486.1	DnaK family protein, putative, expressed
RT1/D1W	162	Pavir.Ga02603.1	30303951	Pavir.Ga02603.1.p|PACid:30303951	-0.1172	0.921975296137493	0.2658	7	Phyto-hormone metabolism	hormone metabolism.auxin.induced-regulated-responsive-activated	AT1G60710.1	NAD(P)-linked oxidoreductase superfamily protein	LOC_Os04g26910.1	oxidoreductase, aldo/keto reductase family protein, putative, expressed
RT1/D1W	165	Pavir.J23570.1	30219029	Pavir.J23570.1.p|PACid:30219029	-0.19731	0.872175276426	0.035	19	Unclassified	not assigned.no ontology.hydroxyproline rich proteins	AT2G39050.1	hydroxyproline-rich glycoprotein family protein	LOC_Os07g48490.2	stress responsive protein, putative, expressed
RT1/D1W	166	Pavir.Ia01092.1	30215299	Pavir.Ia01092.1.p|PACid:30215299	-0.1116	0.925561012468545	0.0001	53	Cell organization	cell.organisation	AT5G23860.1	tubulin beta 8	LOC_Os03g45920.1	tubulin/FtsZ domain containing protein, putative, expressed
RT1/D1W	167	Pavir.Ha01796.1	30318597	Pavir.Ha01796.1.p|PACid:30318597	0.24879	1.18821013552231	<.0001	23	Amino acid metabolism	amino acid metabolism.synthesis.branched chain group.leucine specific.2-isopropylmalate synthase	AT1G74040.1	2-isopropylmalate synthase 1	LOC_Os11g04670.1	2-isopropylmalate synthase B, putative, expressed
RT1/D1W	168	Pavir.J25477.1	30236705	Pavir.J25477.1.p|PACid:30236705	-0.35779	0.780359061680509	0.0003	10	Glycolysis	glycolysis.plastid branch.glyceraldehyde 3-phosphate dehydrogenase (GAP-DH)	AT1G79530.1	glyceraldehyde-3-phosphate dehydrogenase of plastid 1	LOC_Os02g07490.1	glyceraldehyde-3-phosphate dehydrogenase, putative, expressed
RT1/D1W	169	Pavir.Ab00480.1	30232603	Pavir.Ab00480.1.p|PACid:30232603	-0.1947	0.873754569181932	0.0617	10	Glycolysis	glycolysis.plastid branch.glyceraldehyde 3-phosphate dehydrogenase (GAP-DH)	AT1G79530.1	glyceraldehyde-3-phosphate dehydrogenase of plastid 1	LOC_Os02g07490.1	glyceraldehyde-3-phosphate dehydrogenase, putative, expressed
RT1/D1W	170	Pavir.Ga02690.1	30303518	Pavir.Ga02690.1.p|PACid:30303518	0.5109	1.42493884149158	<.0001	15	Phyto-hormone metabolism	hormone metabolism.auxin.induced-regulated-responsive-activated	AT1G60690.1	NAD(P)-linked oxidoreductase superfamily protein	LOC_Os04g26910.1	oxidoreductase, aldo/keto reductase family protein, putative, expressed
RT1/D1W	171	Pavir.Ca00973.1	30206033	Pavir.Ca00973.1.p|PACid:30206033	0.48072	1.39543990917226	<.0001	58	Amino acid metabolism	amino acid metabolism.synthesis.branched chain group.common.ketol-acid reductoisomerase	AT3G58610.1	ketol-acid reductoisomerase	LOC_Os05g49800.1	ketol-acid reductoisomerase, chloroplast precursor, putative, expressed
RT1/D1W	172	Pavir.J06962.1	30198037	Pavir.J06962.1.p|PACid:30198037	0.30582	1.23612102481483	<.0001	26	Glycolysis	glycolysis.cytosolic branch.phosphoglucomutase (PGM)	AT1G23190.1	Phosphoglucomutase/phosphomannomutase family protein	LOC_Os03g50480.1	phosphoglucomutase, putative, expressed
RT1/D1W	173	Pavir.Fa02123.1	30186363	Pavir.Fa02123.1.p|PACid:30186363	1.48094	2.79130543870064	<.0001	36	Amino acid metabolism	amino acid metabolism.degradation.aspartate family.threonine	AT1G11840.6	glyoxalase I homolog	LOC_Os08g09250.2	glyoxalase family protein, putative, expressed
RT1/D1W	174	Pavir.Db01451.1	30260620	Pavir.Db01451.1.p|PACid:30260620	0.97284	1.96270044519152	<.0001	42	Fermentation	fermentation.aldehyde dehydrogenase	AT1G23800.1	aldehyde dehydrogenase 2B7	LOC_Os06g15990.1	aldehyde dehydrogenase, putative, expressed
RT1/D1W	175	Pavir.Aa01893.1	30253850	Pavir.Aa01893.1.p|PACid:30253850	0.15886	1.1164046201458	0.0132	28	Regulation of transcription	RNA.regulation of transcription.Zn-finger(CCHC)	AT5G07350.1	TUDOR-SN protein 1	LOC_Os02g32350.1	TUDOR protein with multiple SNc domains, putative, expressed
RT1/D1W	176	Pavir.Eb00916.1	30309714	Pavir.Eb00916.1.p|PACid:30309714	0.49513	1.40944775353582	<.0001	10			AT5G20890.1	TCP-1/cpn60 chaperonin family protein	LOC_Os03g42220.1	T-complex protein, putative, expressed
RT1/D1W	177	Pavir.Ib00542.1	30241527	Pavir.Ib00542.1.p|PACid:30241527	-0.06082	0.958719047044045	0.0147	76	Protein synthesis	protein.synthesis.ribosomal protein.eukaryotic.40S subunit.SA	AT1G72370.1	40s ribosomal protein SA	LOC_Os03g08440.1	ribosomal protein S2, putative, expressed
RT1/D1W	179	Pavir.Aa02034.1	30250807	Pavir.Aa02034.1.p|PACid:30250807	-0.6024	0.658657331959377	<.0001	10	Metal binding	metal handling.binding, chelation and storage	AT3G56240.1	copper chaperone	LOC_Os02g32814.1	heavy metal-associated domain containing protein, expressed
RT1/D1W	181	Pavir.J29421.1	30284469	Pavir.J29421.1.p|PACid:30284469	0.2801	1.21427904888801	<.0001	19	Glycolysis	glycolysis.cytosolic branch.triosephosphate isomerase (TPI)	AT3G55440.1	triosephosphate isomerase	LOC_Os01g05490.1	triosephosphate isomerase, cytosolic, putative, expressed
RT1/D1W	182	Pavir.Ab03055.1	30235501	Pavir.Ab03055.1.p|PACid:30235501	0.13751	1.100004937905	0.0184	12	Transport	transport.metabolite transporters at the envelope membrane	AT3G08580.1	ADP/ATP carrier 1	LOC_Os02g48720.1	mitochondrial carrier protein, putative, expressed
RT1/D1W	183	Pavir.Ba00300.1	30293244	Pavir.Ba00300.1.p|PACid:30293244	0.1031	1.07407891851737	0.6379	3	Protein degradation	protein.degradation.ubiquitin.proteasom	AT4G29040.1	regulatory particle AAA-ATPase 2A	LOC_Os07g49150.1	26S protease regulatory subunit 4, putative, expressed
RT1/D1W	184	Pavir.Aa00207.1	30249077	Pavir.Aa00207.1.p|PACid:30249077	0.29557	1.22736980778612	<.0001	19	Protein degradation	protein.degradation	AT2G24200.1	Cytosol aminopeptidase family protein	LOC_Os02g55140.1	leucine aminopeptidase, chloroplast precursor, putative, expressed
RT1/D1W	185	Pavir.Hb00360.1	30264628	Pavir.Hb00360.1.p|PACid:30264628	0.2084	1.15540608673679	<.0001	133	Protein degradation	protein.degradation.ubiquitin.proteasom	AT1G53850.1	20S proteasome alpha subunit E1	LOC_Os11g40140.1	peptidase, T1 family, putative, expressed
RT1/D1W	186	Pavir.J00981.1	30202083	Pavir.J00981.1.p|PACid:30202083	0.4027	1.32197967861279	<.0001	14	Protein degradation	protein.degradation	AT2G24200.1	Cytosol aminopeptidase family protein	LOC_Os02g55140.1	leucine aminopeptidase, chloroplast precursor, putative, expressed
RT1/D1W	187	Pavir.Bb03735.1	30297872	Pavir.Bb03735.1.p|PACid:30297872	0.20625	1.15368550620338	<.0001	35	Unclassified	not assigned.no ontology.hydroxyproline rich proteins	AT2G39050.1	hydroxyproline-rich glycoprotein family protein	LOC_Os07g48490.2	stress responsive protein, putative, expressed
RT1/D1W	188	Pavir.J01932.1	30246960	Pavir.J01932.1.p|PACid:30246960	0.13579	1.09869427899998	0.0121	11	Protein degradation	protein.degradation.ubiquitin.proteasom	AT3G05530.1	regulatory particle triple-A ATPase 5A	LOC_Os06g07630.1	26S protease regulatory subunit 6A, putative, expressed
RT1/D1W	189	Pavir.Ab00183.1	30232747	Pavir.Ab00183.1.p|PACid:30232747	0.01145	1.00796811299715	0.8495	14	Glycolysis	glycolysis.cytosolic branch.UGPase	AT5G17310.2	UDP-glucose pyrophosphorylase 2	LOC_Os02g02560.1	UTP--glucose-1-phosphate uridylyltransferase, putative, expressed
RT1/D1W	190	Pavir.Cb00088.1	30268965	Pavir.Cb00088.1.p|PACid:30268965	0.36497	1.28785484904266	<.0001	56	Amino acid metabolism	amino acid metabolism.synthesis.serine-glycine-cysteine group.cysteine.OASTL	AT4G14880.1	O-acetylserine (thiol) lyase (OAS-TL) isoform A1	LOC_Os12g42980.1	cysteine synthase, putative, expressed
RT1/D1W	192	Pavir.Ea00522.1	30228204	Pavir.Ea00522.1.p|PACid:30228204	0.43579	1.35265132356485	0.0002	3			AT5G20890.1	TCP-1/cpn60 chaperonin family protein	LOC_Os03g42220.1	T-complex protein, putative, expressed
RT1/D1W	193	Pavir.Aa00660.1	30250922	Pavir.Aa00660.1.p|PACid:30250922	0.03268	1.02291055574814	0.4252	7	Transport	transport.metabolite transporters at the envelope membrane	AT3G08580.1	ADP/ATP carrier 1	LOC_Os02g48720.1	mitochondrial carrier protein, putative, expressed
RT1/D1W	194	Pavir.J02077.1	30275035	Pavir.J02077.1.p|PACid:30275035	0.4775	1.39232885263149	0.0001	11	Unclassified	not assigned.no ontology	AT5G10860.1	Cystathionine beta-synthase (CBS) family protein	LOC_Os03g52690.2	CBS domain containing membrane protein, putative, expressed
RT1/D1W	195	Pavir.Aa03469.1	30250285	Pavir.Aa03469.1.p|PACid:30250285	0.14601	1.10650502277406	0.0501	13			AT3G13470.1	TCP-1/cpn60 chaperonin family protein	LOC_Os02g01280.1	T-complex protein, putative, expressed
RT1/D1W	196	Pavir.J37581.1	30190132	Pavir.J37581.1.p|PACid:30190132	-0.21064	0.864153795374568	0.0003	30	Protein synthesis	protein.synthesis.initiation	AT3G11400.1	eukaryotic translation initiation factor 3G1	LOC_Os02g54700.2	RNA recognition motif containing protein, putative, expressed
RT1/D1W	197	Pavir.Ca00431.1	30205375	Pavir.Ca00431.1.p|PACid:30205375	-0.28316	0.821789042919528	<.0001	103	Abiotic/biotic stress	stress.abiotic.heat	AT4G24280.1	chloroplast heat shock protein 70-1	LOC_Os12g14070.1	DnaK family protein, putative, expressed
RT1/D1W	198	Pavir.Ab01308.1	30235233	Pavir.Ab01308.1.p|PACid:30235233	0.1176	1.08492852411834	0.0767	23	Regulation of transcription	RNA.regulation of transcription.Zn-finger(CCHC)	AT5G07350.1	TUDOR-SN protein 1	LOC_Os02g32350.1	TUDOR protein with multiple SNc domains, putative, expressed
RT1/D1W	199	Pavir.Ca00075.2	30205938	Pavir.Ca00075.2.p|PACid:30205938	0.253	1.19168257457405	0.0399	9	Amino acid metabolism	amino acid metabolism.synthesis.branched chain group.leucine specific.2-isopropylmalate synthase	AT1G74040.1	2-isopropylmalate synthase 1	LOC_Os11g04670.1	2-isopropylmalate synthase B, putative, expressed
RT1/D1W	201	Pavir.Eb01271.1	30312791	Pavir.Eb01271.1.p|PACid:30312791	0.08203	1.0585064056682	0.2329	9	Amino acid metabolism	amino acid metabolism.synthesis.aspartate family.methionine.S-adenosylmethionine synthetase	AT1G02500.1	S-adenosylmethionine synthetase 1	LOC_Os01g18860.1	S-adenosylmethionine synthetase, putative, expressed
RT1/D1W	203	Pavir.Ea00822.1	30229679	Pavir.Ea00822.1.p|PACid:30229679	0.42214	1.33991362214806	<.0001	30	Protein synthesis	protein.synthesis.ribosomal protein.eukaryotic.40S subunit.S5	AT2G37270.1	ribosomal protein 5B	LOC_Os01g01060.1	40S ribosomal protein S5, putative, expressed
RT1/D1W	204	Pavir.Ia04266.1	30212722	Pavir.Ia04266.1.p|PACid:30212722	0.22202	1.16636553893609	<.0001	38	Amino acid metabolism	amino acid metabolism.synthesis.serine-glycine-cysteine group.serine.phosphoserine aminotransferase	AT4G35630.1	phosphoserine aminotransferase	LOC_Os03g06200.1	aminotransferase, putative, expressed
RT1/D1W	205	Pavir.Ga00571.1	30305906	Pavir.Ga00571.1.p|PACid:30305906	0.59727	1.51285110048002	<.0001	15	Glycolysis	glycolysis.cytosolic branch.pyruvate kinase (PK)	AT5G08570.1	Pyruvate kinase family protein	LOC_Os04g58110.1	pyruvate kinase, putative, expressed
RT1/D1W	206	Pavir.J02786.1	30218390	Pavir.J02786.1.p|PACid:30218390	0.18495	1.13677757484475	<.0001	93	TCA cycle	TCA / org transformation.TCA.pyruvate DH.E2	AT3G52200.2	Dihydrolipoamide acetyltransferase, long form protein	LOC_Os06g30460.4	2-oxo acid dehydrogenases acyltransferase domain containing protein, expressed
RT1/D1W	208	Pavir.Ab02375.1	30236318	Pavir.Ab02375.1.p|PACid:30236318	0.1575	1.11535270354201	0.1324	7	Protein degradation	protein.degradation	AT1G16470.1	proteasome subunit PAB1	LOC_Os03g26970.1	peptidase, T1 family, putative, expressed
RT1/D1W	210	Pavir.Ga00286.1	30303791	Pavir.Ga00286.1.p|PACid:30303791	-0.26862	0.830113205235503	0.0003	9	Amino acid metabolism	amino acid metabolism.synthesis.serine-glycine-cysteine group.serine.phosphoglycerate dehydrogenase	AT3G19480.1	D-3-phosphoglycerate dehydrogenase	LOC_Os04g55720.1	D-3-phosphoglycerate dehydrogenase, chloroplast precursor, putative, expressed
RT1/D1W	211	Pavir.Gb00269.1	30222106	Pavir.Gb00269.1.p|PACid:30222106	0.6084	1.52456747160435	0.0001	4	Glycolysis	glycolysis.cytosolic branch.pyruvate kinase (PK)	AT5G08570.1	Pyruvate kinase family protein	LOC_Os04g58110.1	pyruvate kinase, putative, expressed
RT1/D1W	212	Pavir.Ia00478.1	30211353	Pavir.Ia00478.1.p|PACid:30211353	0.19833	1.14736944185742	<.0001	13	Cell organization	cell.organisation	AT5G62690.1	tubulin beta chain 2	LOC_Os03g56810.1	tubulin/FtsZ domain containing protein, putative, expressed
RT1/D1W	213	Pavir.Ab00812.1	30236369	Pavir.Ab00812.1.p|PACid:30236369	-0.04604	0.968591333800249	0.4018	35			AT2G25970.1	KH domain-containing protein	LOC_Os02g13130.1	KH domain-containing protein, putative, expressed
RT1/D1W	214	Pavir.Ab03192.1	30235936	Pavir.Ab03192.1.p|PACid:30235936	0.1439	1.10488789715254	0.2326	2	Protein degradation	protein.degradation.ubiquitin.proteasom	AT3G05530.1	regulatory particle triple-A ATPase 5A	LOC_Os06g07630.1	26S protease regulatory subunit 6A, putative, expressed
RT1/D1W	215	Pavir.Ab00083.1	30233437	Pavir.Ab00083.1.p|PACid:30233437	0.06641	1.04710781762512	0.4959	4			AT3G13470.1	TCP-1/cpn60 chaperonin family protein	LOC_Os02g01280.1	T-complex protein, putative, expressed
RT1/D1W	216	Pavir.J01277.1	30295127	Pavir.J01277.1.p|PACid:30295127	0.17846	1.13167523737682	<.0001	84	TCA cycle	TCA / org transformation.TCA.pyruvate DH.E2	AT3G52200.2	Dihydrolipoamide acetyltransferase, long form protein	LOC_Os06g30460.2	2-oxo acid dehydrogenases acyltransferase domain containing protein, expressed
RT1/D1W	217	Pavir.Eb00259.1	30311879	Pavir.Eb00259.1.p|PACid:30311879	0.006248	1.00434017497984	0.8708	62	Protein targeting & vesicle tansport	protein.targeting.mitochondria	AT3G16480.1	mitochondrial processing peptidase alpha subunit	LOC_Os01g09560.1	mitochondrial-processing peptidase subunit alpha, mitochondrial precursor, putative, expressed
RT1/D1W	219	Pavir.Ga01168.1	30305816	Pavir.Ga01168.1.p|PACid:30305816	0.23559	1.17738813970462	0.0062	15	Secondary metabolism	secondary metabolism.phenylpropanoids.lignin biosynthesis.PAL	AT2G37040.1	PHE ammonia lyase 1	LOC_Os02g41630.2	phenylalanine ammonia-lyase, putative, expressed
RT1/D1W	220	Pavir.Ib00682.1	30238374	Pavir.Ib00682.1.p|PACid:30238374	-0.06838	0.953708314574601	0.1135	42	Transport	transport.porins	AT5G67500.1	voltage dependent anion channel 2	LOC_Os03g10510.1	outer mitochondrial membrane porin, putative, expressed
RT1/D1W	221	Pavir.J34407.1	30273602	Pavir.J34407.1.p|PACid:30273602	-0.05692	0.961314233490863	0.1256	44	Protein synthesis	protein.synthesis.ribosomal protein.eukaryotic.60S subunit.L4/L1	AT3G09630.1	Ribosomal protein L4/L1 family	LOC_Os03g58204.1	ribosomal protein L4, putative, expressed
RT1/D1W	222	Pavir.J39847.1	30295683	Pavir.J39847.1.p|PACid:30295683	0.45271	1.3686086777385	<.0001	107	Transport	transport.metabolite transporters at the mitochondrial membrane	AT4G28390.1	ADP/ATP carrier 3	LOC_Os05g23720.1	mitochondrial carrier protein, putative, expressed
RT1/D1W	223	Pavir.Ca01626.1	30204597	Pavir.Ca01626.1.p|PACid:30204597	0.06247	1.04425206759035	0.3079	16	Protein degradation	protein.degradation	AT3G51800.3	metallopeptidase M24 family protein	LOC_Os05g28280.1	peptidase, M24 family protein, putative, expressed
RT1/D1W	224	Pavir.Cb01326.1	30269224	Pavir.Cb01326.1.p|PACid:30269224	0.1114	1.08027603442997	0.0328	23	Protein degradation	protein.degradation	AT3G51800.3	metallopeptidase M24 family protein	LOC_Os05g28280.1	peptidase, M24 family protein, putative, expressed
RT1/D1W	225	Pavir.Ea01477.2	30231125	Pavir.Ea01477.2.p|PACid:30231125	1.5486	2.9253312549149	<.0001	29	Functional enzyme	misc.peroxidases	AT1G44970.1	Peroxidase superfamily protein	LOC_Os01g22352.1	peroxidase precursor, putative, expressed
RT1/D1W	226	Pavir.J00891.1	30275044	Pavir.J00891.1.p|PACid:30275044	-0.09347	0.937265705066709	0.0008	112	Cell organization	cell.organisation	AT5G59890.1	actin depolymerizing factor 4	LOC_Os04g46910.1	actin-depolymerizing factor, putative, expressed
RT1/D1W	227	Pavir.J02201.1	30287038	Pavir.J02201.1.p|PACid:30287038	0.79441	1.73436794762234	<.0001	13	Phyto-hormone metabolism	hormone metabolism.auxin.induced-regulated-responsive-activated	AT1G60730.3	NAD(P)-linked oxidoreductase superfamily protein	LOC_Os04g26910.1	oxidoreductase, aldo/keto reductase family protein, putative, expressed
RT1/D1W	228	Pavir.Ib01386.1	30237233	Pavir.Ib01386.1.p|PACid:30237233	0.38568	1.30647543622772	<.0001	50	Protein degradation	protein.degradation.ubiquitin.proteasom	AT4G29040.1	regulatory particle AAA-ATPase 2A	LOC_Os03g18690.1	26S protease regulatory subunit 4, putative, expressed
RT1/D1W	230	Pavir.Ib00364.1	30238302	Pavir.Ib00364.1.p|PACid:30238302	0.17159	1.12629909968206	<.0001	22	Amino acid metabolism	amino acid metabolism.synthesis.serine-glycine-cysteine group.serine.phosphoserine aminotransferase	AT4G35630.1	phosphoserine aminotransferase	LOC_Os03g06200.1	aminotransferase, putative, expressed
RT1/D1W	231	Pavir.Ca01146.1	30204502	Pavir.Ca01146.1.p|PACid:30204502	-0.07305	0.950626154466961	0.4573	9	Protein synthesis	protein.synthesis.ribosomal protein.eukaryotic.60S subunit.L18	AT3G05590.1	ribosomal protein L18	LOC_Os05g06310.1	60S ribosomal protein L18-3, putative, expressed
RT1/D1W	232	Pavir.Ia01006.1	30213987	Pavir.Ia01006.1.p|PACid:30213987	-0.01222	0.991565513024079	0.9236	4			AT2G21660.1	cold, circadian rhythm, and rna binding 2	LOC_Os03g46770.1	RNA recognition motif containing protein, expressed
RT1/D1W	234	Pavir.J05523.1	30207203	Pavir.J05523.1.p|PACid:30207203	-0.07953	0.9463659028141	0.0479	36	Protein synthesis	protein.synthesis.ribosomal protein.eukaryotic.60S subunit.L4/L1	AT3G09630.1	Ribosomal protein L4/L1 family	LOC_Os03g58204.1	ribosomal protein L4, putative, expressed
RT1/D1W	235	Pavir.Eb02269.1	30312268	Pavir.Eb02269.1.p|PACid:30312268	0.26894	1.20492220264708	<.0001	46	TCA cycle	TCA / org transformation.TCA.pyruvate DH.E3	AT1G48030.1	mitochondrial lipoamide dehydrogenase 1	LOC_Os01g22520.1	dihydrolipoyl dehydrogenase 1, mitochondrial precursor, putative, expressed
RT1/D1W	236	Pavir.Ea01253.1	30228444	Pavir.Ea01253.1.p|PACid:30228444	0.21924	1.1641201758833	<.0001	33	TCA cycle	TCA / org transformation.TCA.pyruvate DH.E3	AT1G48030.1	mitochondrial lipoamide dehydrogenase 1	LOC_Os01g22520.1	dihydrolipoyl dehydrogenase 1, mitochondrial precursor, putative, expressed
RT1/D1W	237	Pavir.J10121.1	30244273	Pavir.J10121.1.p|PACid:30244273	-0.07499	0.94934870131147	0.1743	12	Amino acid metabolism	amino acid metabolism.synthesis.aspartate family.methionine.methionine synthase	AT3G03780.1	methionine synthase 2	LOC_Os12g42876.1	5-methyltetrahydropteroyltriglutamate--homocysteine methyltransferase, putative, expressed
RT1/D1W	238	Pavir.Eb02929.1	30310325	Pavir.Eb02929.1.p|PACid:30310325	1.063	2.08927152572846	<.0001	6	TCA cycle	TCA / org transformation.other organic acid transformatons.malic	AT5G11670.1	NADP-malic enzyme 2	LOC_Os01g52500.3	NADP-dependent malic enzyme, putative, expressed
RT1/D1W	241	Pavir.Ab02428.1	30236530	Pavir.Ab02428.1.p|PACid:30236530	0.3945	1.31448711473356	<.0001	41			AT1G62740.1	stress-inducible protein, putative	LOC_Os02g43020.1	heat shock protein STI, putative, expressed
RT1/D1W	242	Pavir.Ia01006.2	30213988	Pavir.Ia01006.2.p|PACid:30213988	0.6954	1.61933334539658	0.2984	2			AT2G21660.1	cold, circadian rhythm, and rna binding 2	LOC_Os03g46770.1	RNA recognition motif containing protein, expressed
RT1/D1W	243	Pavir.Ab00553.1	30236249	Pavir.Ab00553.1.p|PACid:30236249	0.33079	1.25770188628283	<.0001	22			AT3G11830.1	TCP-1/cpn60 chaperonin family protein	LOC_Os06g47320.1	T-complex protein, putative, expressed
RT1/D1W	244	Pavir.Ab00749.1	30234169	Pavir.Ab00749.1.p|PACid:30234169	-0.04665	0.968181880793959	0.1247	60	Protein degradation	protein.degradation.ubiquitin.proteasom	AT5G19990.1	regulatory particle triple-A ATPase 6A	LOC_Os02g11050.1	26S protease regulatory subunit, putative, expressed
RT1/D1W	245	Pavir.Ia04446.1	30215874	Pavir.Ia04446.1.p|PACid:30215874	0.58597	1.50104788377658	<.0001	47	TCA cycle	TCA / org transformation.TCA.aconitase	AT2G05710.1	aconitase 3	LOC_Os03g04410.1	aconitate hydratase protein, putative, expressed
RT1/D1W	246	Pavir.Ia04385.1	30214755	Pavir.Ia04385.1.p|PACid:30214755	-0.01998	0.986246376676497	0.5317	48	Protein synthesis	protein.synthesis.ribosomal protein.eukaryotic.40S subunit.SA	AT1G72370.1	40s ribosomal protein SA	LOC_Os03g08440.1	ribosomal protein S2, putative, expressed
RT1/D1W	247	Pavir.Fa02199.1	30185615	Pavir.Fa02199.1.p|PACid:30185615	-0.5248	0.69505545838891	<.0001	8	Major CHO metabolism	major CHO metabolism.degradation.sucrose.fructokinase	AT4G10260.1	pfkB-like carbohydrate kinase family protein	LOC_Os08g02120.1	kinase, pfkB family, putative, expressed
RT1/D1W	249	Pavir.J14758.1	30244007	Pavir.J14758.1.p|PACid:30244007	-0.5116	0.701444079957355	0.1179	2	Amino acid metabolism	amino acid metabolism.synthesis.serine-glycine-cysteine group.serine.phosphoglycerate dehydrogenase	AT4G34200.1	D-3-phosphoglycerate dehydrogenase	LOC_Os04g55720.1	D-3-phosphoglycerate dehydrogenase, chloroplast precursor, putative, expressed
RT1/D1W	250	Pavir.J40796.1	30185086	Pavir.J40796.1.p|PACid:30185086	0.02664	1.0186369813739	0.803	18	Unclassified	not assigned.unknown	N	N	LOC_Os12g36830.1	pathogenesis-related Bet v I family protein, putative, expressed
RT1/D1W	251	Pavir.Fa00399.1	30188436	Pavir.Fa00399.1.p|PACid:30188436	-0.18481	0.879764931543846	0.0011	9	Protein synthesis	protein.synthesis.ribosomal protein.eukaryotic.60S subunit.L32	AT4G18100.1	Ribosomal protein L32e	LOC_Os08g41300.1	60S ribosomal protein L32, putative, expressed
RT1/D1W	252	Pavir.J04126.1	30273216	Pavir.J04126.1.p|PACid:30273216	0.04351	1.03061821798877	0.5089	9	Protein synthesis	protein.synthesis.ribosomal protein.eukaryotic.40S subunit.S3	AT5G35530.1	Ribosomal protein S3 family protein	LOC_Os07g41750.1	40S ribosomal protein S3-1, putative, expressed
RT1/D1W	253	Pavir.Ab01682.1	30235210	Pavir.Ab01682.1.p|PACid:30235210	-0.09828	0.934146029096398	0.4187	9	Protein degradation	protein.degradation.ubiquitin.E2	AT2G36060.1	MMS ZWEI homologue 3	LOC_Os09g12570.1	ubiquitin-conjugating enzyme, putative, expressed
RT1/D1W	254	Pavir.J25534.1	30256265	Pavir.J25534.1.p|PACid:30256265	0.08724	1.06233589702824	0.1276	20	Secondary metabolism	secondary metabolism.phenylpropanoids.lignin biosynthesis.PAL	AT3G53260.1	phenylalanine ammonia-lyase 2	LOC_Os02g41630.2	phenylalanine ammonia-lyase, putative, expressed
RT1/D1W	255	Pavir.J10032.1	30190366	Pavir.J10032.1.p|PACid:30190366	0.3413	1.26689767029877	<.0001	16	Nucleotide metabolism	nucleotide metabolism.salvage.nucleoside kinases.adenosine kinase	AT3G09820.1	adenosine kinase 1	LOC_Os02g41590.1	kinase, pfkB family, putative, expressed
RT1/D1W	256	Pavir.J00130.1	30200135	Pavir.J00130.1.p|PACid:30200135	2.312	4.96570996610445	<.0001	6	Phyto-hormone metabolism	hormone metabolism.auxin.induced-regulated-responsive-activated	AT1G60730.1	NAD(P)-linked oxidoreductase superfamily protein	LOC_Os04g26910.1	oxidoreductase, aldo/keto reductase family protein, putative, expressed
RT1/D1W	257	Pavir.J28997.1	30302170	Pavir.J28997.1.p|PACid:30302170	-0.07423	0.949848942226841	0.0914	33	Protein synthesis	protein.synthesis.ribosomal protein.eukaryotic.60S subunit.L4/L1	AT5G02870.1	Ribosomal protein L4/L1 family	LOC_Os03g58204.1	ribosomal protein L4, putative, expressed
RT1/D1W	260	Pavir.J37141.1	30259827	Pavir.J37141.1.p|PACid:30259827	0.60761	1.5237328679148	<.0001	8	Abiotic/biotic stress	stress.abiotic.cold	AT1G05260.1	Peroxidase superfamily protein	LOC_Os01g22230.1	peroxidase precursor, putative, expressed
RT1/D1W	261	Pavir.Fa00544.1	30185761	Pavir.Fa00544.1.p|PACid:30185761	-0.2029	0.868802403857248	0.0652	6	Abiotic/biotic stress	stress.abiotic.heat	AT5G56030.1	heat shock protein 81-2	LOC_Os08g39140.1	heat shock protein, putative, expressed
RT1/D1W	262	Pavir.J04556.1	30273695	Pavir.J04556.1.p|PACid:30273695	-0.49288	0.710605125605295	<.0001	83			AT3G26420.1	RNA-binding (RRM/RBD/RNP motifs) family protein with retrovirus zinc finger-like domain	LOC_Os03g61990.1	glycine-rich RNA-binding protein 7, putative, expressed
RT1/D1W	263	Pavir.Aa02481.1	30253824	Pavir.Aa02481.1.p|PACid:30253824	-0.17867	0.883517122812706	0.0045	20	Protein degradation	protein.degradation.ubiquitin.E2	AT2G36060.1	MMS ZWEI homologue 3	LOC_Os09g12570.1	ubiquitin-conjugating enzyme, putative, expressed
RT1/D1W	264	Pavir.Ba01628.1	30292615	Pavir.Ba01628.1.p|PACid:30292615	-0.03303	0.977365442456469	0.7364	6	Protein synthesis	protein.synthesis.ribosomal protein.eukaryotic.60S subunit.L32	AT4G18100.1	Ribosomal protein L32e	LOC_Os09g32500.1	60S ribosomal protein L32, putative, expressed
RT1/D1W	265	Pavir.J33952.1	30281345	Pavir.J33952.1.p|PACid:30281345	2.1433	4.41771393093304	<.0001	3	Functional enzyme	misc.misc2	AT2G32520.1	alpha/beta-Hydrolases superfamily protein	LOC_Os01g34700.1	dienelactone hydrolase family protein, expressed
RT1/D1W	266	Pavir.J08390.1	30274140	Pavir.J08390.1.p|PACid:30274140	-0.01223	0.991558640039502	0.5714	140	Protein synthesis	protein.synthesis.elongation	AT4G02930.1	GTP binding Elongation factor Tu family protein	LOC_Os03g63410.1	elongation factor Tu, putative, expressed
RT1/D1W	267	Pavir.J39967.1	30263325	Pavir.J39967.1.p|PACid:30263325	0.74102	1.67135708761217	<.0001	72	Secondary metabolism	secondary metabolism.flavonoids.isoflavones.isoflavone reductase	AT1G75290.1	NAD(P)-binding Rossmann-fold superfamily protein	LOC_Os01g01660.1	isoflavone reductase, putative, expressed
RT1/D1W	268	Pavir.Fa00408.1	30185990	Pavir.Fa00408.1.p|PACid:30185990	-0.03353	0.977026772096553	0.5728	16	Protein synthesis	protein.synthesis.ribosomal protein.eukaryotic.60S subunit.L32	AT4G18100.1	Ribosomal protein L32e	LOC_Os08g41300.1	60S ribosomal protein L32, putative, expressed
RT1/D1W	269	Pavir.Ea00259.1	30230158	Pavir.Ea00259.1.p|PACid:30230158	-0.0458	0.968752477527949	0.3827	45	Protein targeting & vesicle tansport	protein.targeting.mitochondria	AT1G51980.1	Insulinase (Peptidase family M16) protein	LOC_Os01g09560.1	mitochondrial-processing peptidase subunit alpha, mitochondrial precursor, putative, expressed
RT1/D1W	270	Pavir.Ia03662.1	30214406	Pavir.Ia03662.1.p|PACid:30214406	0.17777	1.1311341187129	<.0001	37	Cell wall synthesis / modification	cell wall.precursor synthesis.UXS	AT2G28760.1	UDP-XYL synthase 6	LOC_Os03g16980.1	NAD dependent epimerase/dehydratase family domain containing protein, expressed
RT1/D1W	271	Pavir.Aa01218.1	30252192	Pavir.Aa01218.1.p|PACid:30252192	0.32914	1.25626428387517	<.0001	26			AT1G62740.1	stress-inducible protein, putative	LOC_Os02g43020.1	heat shock protein STI, putative, expressed
RT1/D1W	272	Pavir.Aa03576.1	30251900	Pavir.Aa03576.1.p|PACid:30251900	0.19208	1.1424095937313	<.0001	141	TCA cycle	TCA / org transformation.TCA.pyruvate DH.E2	AT1G54220.1	Dihydrolipoamide acetyltransferase, long form protein	LOC_Os07g22720.2	2-oxo acid dehydrogenases acyltransferase domain containing protein, expressed
RT1/D1W	273	Pavir.J01984.1	30220368	Pavir.J01984.1.p|PACid:30220368	0.36141	1.28468085100928	<.0001	78	Protein synthesis	protein.synthesis.initiation	AT5G57870.1	MIF4G domain-containing protein / MA3 domain-containing protein	LOC_Os04g42140.1	eukaryotic initiation factor iso-4F subunit p82-34, putative, expressed
RT1/D1W	274	Pavir.J27771.1	30219066	Pavir.J27771.1.p|PACid:30219066	-0.9839	0.505611085500906	<.0001	7	Abiotic/biotic stress	stress.abiotic.unspecified	AT1G70840.1	MLP-like protein 31	LOC_Os12g36830.1	pathogenesis-related Bet v I family protein, putative, expressed
RT1/D1W	275	Pavir.Ba01868.1	30288468	Pavir.Ba01868.1.p|PACid:30288468	-0.05251	0.964257254506814	0.4101	22			AT5G20720.1	chaperonin 20	LOC_Os09g26730.1	chaperonin, putative, expressed
RT1/D1W	277	Pavir.Eb01044.1	30309662	Pavir.Eb01044.1.p|PACid:30309662	0.2164	1.16183081517497	0.0532	5	Protein synthesis	protein.synthesis.ribosomal protein.eukaryotic.40S subunit.S5	AT2G37270.1	ribosomal protein 5B	LOC_Os11g29190.2	40S ribosomal protein S5, putative, expressed
RT1/D1W	278	Pavir.J00472.1	30245549	Pavir.J00472.1.p|PACid:30245549	0.40874	1.32752589240738	<.0001	14	Glycolysis	glycolysis.cytosolic branch.phosphofructokinase (PFK)	AT4G26270.1	phosphofructokinase 3	LOC_Os05g44922.1	6-phosphofructokinase, putative, expressed
RT1/D1W	279	Pavir.Ba02924.1	30291101	Pavir.Ba02924.1.p|PACid:30291101	-0.3344	0.793113914834435	0.061	2	Protein degradation	protein.degradation.ubiquitin.E2	AT2G36060.1	MMS ZWEI homologue 3	LOC_Os09g12570.1	ubiquitin-conjugating enzyme, putative, expressed
RT1/D1W	280	Pavir.J08673.1	30190581	Pavir.J08673.1.p|PACid:30190581	-0.1632	0.893042041856382	0.1128	7	Cell division & Cell cycle	cell.division	AT5G03340.1	ATPase, AAA-type, CDC48 protein	LOC_Os10g30580.1	cell division control protein 48 homolog E, putative, expressed
RT1/D1W	281	Pavir.J36017.1	30257465	Pavir.J36017.1.p|PACid:30257465	0.30276	1.23350195312428	<.0001	120	TCA cycle	TCA / org transformation.other organic acid transformatons.atp-citrate lyase	AT5G49460.1	ATP citrate lyase subunit B 2	LOC_Os01g19450.1	ATP-citrate synthase subunit 1, putative, expressed
RT1/D1W	282	Pavir.Bb01230.1	30300731	Pavir.Bb01230.1.p|PACid:30300731	-0.145	0.904379377561088	0.3604	3	Protein degradation	protein.degradation.ubiquitin.E2	AT2G36060.1	MMS ZWEI homologue 3	LOC_Os09g12570.1	ubiquitin-conjugating enzyme, putative, expressed
RT1/D1W	283	Pavir.Ea01469.1	30229084	Pavir.Ea01469.1.p|PACid:30229084	0.26276	1.19977177734905	0.0044	8	Functional enzyme	misc.peroxidases	AT4G11290.1	Peroxidase superfamily protein	LOC_Os01g22370.1	peroxidase precursor, putative, expressed
RT1/D1W	284	Pavir.Eb01214.1	30312155	Pavir.Eb01214.1.p|PACid:30312155	0.75343	1.68579604118662	<.0001	5	Abiotic/biotic stress	stress.abiotic.cold	AT1G05260.1	Peroxidase superfamily protein	LOC_Os01g22230.1	peroxidase precursor, putative, expressed
RT1/D1W	285	Pavir.Ab02966.1	30233199	Pavir.Ab02966.1.p|PACid:30233199	-0.22791	0.853870979973397	<.0001	28	TCA cycle	TCA / org transformation.TCA.pyruvate DH.E1	AT1G59900.1	pyruvate dehydrogenase complex E1 alpha subunit	LOC_Os02g50620.1	dehydrogenase E1 component domain containing protein, expressed
RT1/D1W	286	Pavir.Ea01477.1	30231124	Pavir.Ea01477.1.p|PACid:30231124	1.21867	2.32732065991666	<.0001	19	Functional enzyme	misc.peroxidases	AT3G21770.1	Peroxidase superfamily protein	LOC_Os01g22336.1	peroxidase precursor, putative, expressed
RT1/D1W	287	Pavir.Ga02004.1	30303710	Pavir.Ga02004.1.p|PACid:30303710	0.16662	1.1224257407644	0.0014	21	Phyto-hormone metabolism	hormone metabolism.auxin.induced-regulated-responsive-activated	AT1G60730.1	NAD(P)-linked oxidoreductase superfamily protein	LOC_Os04g26910.1	oxidoreductase, aldo/keto reductase family protein, putative, expressed
RT1/D1W	288	Pavir.J40794.1	30248287	Pavir.J40794.1.p|PACid:30248287	-0.1171	0.922039204810079	0.2582	15	Calvin cycle	PS.calvin cycle.aldolase	AT2G01140.1	Aldolase superfamily protein	LOC_Os01g02880.1	fructose-bisphospate aldolase isozyme, putative, expressed
RT1/D1W	289	Pavir.Eb00439.1	30313867	Pavir.Eb00439.1.p|PACid:30313867	0.06883	1.04886572717819	0.2098	27	Unclassified	not assigned.unknown	AT1G29250.1	Alba DNA/RNA-binding protein	LOC_Os01g07810.1	protein of unknown function domain containing protein, expressed
RT1/D1W	290	Pavir.Ia04746.1	30214053	Pavir.Ia04746.1.p|PACid:30214053	0.08573	1.06122458246056	0.1275	57	Amino acid metabolism	amino acid metabolism.degradation.branched chain group.shared	AT2G33150.1	peroxisomal 3-ketoacyl-CoA thiolase 3	LOC_Os10g31950.1	3-ketoacyl-CoA thiolase, peroxisomal precursor, putative, expressed
RT1/D1W	291	Pavir.Fb02074.1	30279200	Pavir.Fb02074.1.p|PACid:30279200	0.05018	1.03539409827289	0.2274	86	DNA synthesis	DNA.synthesis/chromatin structure.histone.core.H2B	AT2G28720.1	Histone superfamily protein	LOC_Os01g06010.1	Core histone H2A/H2B/H3/H4 domain containing protein, putative, expressed
RT1/D1W	292	Pavir.J40629.1	30294248	Pavir.J40629.1.p|PACid:30294248	0.07169	1.05094706191625	0.7805	2	Amino acid metabolism	amino acid metabolism.synthesis.aspartate family.methionine	AT5G17920.1	Cobalamin-independent synthase family protein	LOC_Os12g42876.1	5-methyltetrahydropteroyltriglutamate--homocysteine methyltransferase, putative, expressed
RT1/D1W	293	Pavir.J10622.1	30197717	Pavir.J10622.1.p|PACid:30197717	0.20179	1.15012446800383	0.0002	38			AT5G20720.1	chaperonin 20	LOC_Os09g26730.1	chaperonin, putative, expressed
RT1/D1W	294	Pavir.Fb00165.1	30279694	Pavir.Fb00165.1.p|PACid:30279694	-0.1164	0.922486689574407	0.2546	10	Protein synthesis	protein.synthesis.initiation	AT3G11400.1	eukaryotic translation initiation factor 3G1	LOC_Os02g54700.2	RNA recognition motif containing protein, putative, expressed
RT1/D1W	295	Pavir.Ba00532.1	30289237	Pavir.Ba00532.1.p|PACid:30289237	-0.17119	0.888109825884072	0.0431	23	Cell organization	cell.organisation	AT5G19780.1	tubulin alpha-5	LOC_Os07g38730.1	tubulin/FtsZ domain containing protein, putative, expressed
RT1/D1W	296	Pavir.Aa01024.1	30250051	Pavir.Aa01024.1.p|PACid:30250051	0.39025	1.31062049740728	<.0001	35	Amino acid metabolism	amino acid metabolism.degradation.aspartate family.methionine	AT4G13940.1	S-adenosyl-L-homocysteine hydrolase	LOC_Os11g26850.2	erythronate-4-phosphate dehydrogenase, putative, expressed
RT1/D1W	297	Pavir.Ca01780.1	30206225	Pavir.Ca01780.1.p|PACid:30206225	2.33884	5.05895708200896	<.0001	50	Development	development.late embryogenesis abundant	AT3G15670.1	Late embryogenesis abundant protein (LEA) family protein	LOC_Os05g46480.1	late embryogenesis abundant protein, group 3, putative, expressed
RT1/D1W	298	Pavir.J15849.1	30199049	Pavir.J15849.1.p|PACid:30199049	-0.42887	0.742843394289254	<.0001	23	Glyoxylate cycle	gluconeogenesis / glyoxylate cycle.pyruvate dikinase	AT4G15530.5	pyruvate orthophosphate dikinase	LOC_Os05g33570.2	pyruvate, phosphate dikinase, chloroplast precursor, putative, expressed
RT1/D1W	299	Pavir.J00783.1	30220453	Pavir.J00783.1.p|PACid:30220453	-0.1523	0.899814799110512	0.1984	4	Phyto-hormone metabolism	hormone metabolism.brassinosteroid.signal transduction.other	AT2G46280.1	TGF-beta receptor interacting protein 1	LOC_Os08g21660.1	WD domain, G-beta repeat domain containing protein, expressed
RT1/D1W	300	Pavir.Gb01670.1	30221979	Pavir.Gb01670.1.p|PACid:30221979	-0.18658	0.878686235739303	<.0001	91	Protein synthesis	protein.synthesis.ribosomal protein.eukaryotic.40S subunit.S27	AT3G61110.1	ribosomal protein S27	LOC_Os04g27860.1	40S ribosomal protein S27, putative, expressed
RT1/D1W	301	Pavir.Da01650.1	30193562	Pavir.Da01650.1.p|PACid:30193562	0.9555	1.93925161081189	<.0001	14	Fermentation	fermentation.aldehyde dehydrogenase	AT1G23800.1	aldehyde dehydrogenase 2B7	LOC_Os06g15990.1	aldehyde dehydrogenase, putative, expressed
RT1/D1W	304	Pavir.Ia04387.1	30212935	Pavir.Ia04387.1.p|PACid:30212935	0.06271	1.04442579893086	0.257	25	Protein synthesis	protein.synthesis.ribosomal protein.eukaryotic.40S subunit.SA	AT1G72370.1	40s ribosomal protein SA	LOC_Os03g08440.1	ribosomal protein S2, putative, expressed
RT1/D1W	305	Pavir.J10043.1	30199148	Pavir.J10043.1.p|PACid:30199148	0.6226	1.53964740838434	0.0036	4	Unclassified	not assigned.no ontology	AT5G10860.1	Cystathionine beta-synthase (CBS) family protein	LOC_Os03g52690.2	CBS domain containing membrane protein, putative, expressed
RT1/D1W	306	Pavir.Hb01548.1	30264485	Pavir.Hb01548.1.p|PACid:30264485	0.31941	1.24782013996411	<.0001	46	Redox balance	redox.thioredoxin.PDIL	AT1G21750.1	PDI-like 1-1	LOC_Os11g09280.1	OsPDIL1-1 protein disulfide isomerase PDIL1-1, expressed
RT1/D1W	308	Pavir.Ib01205.1	30241015	Pavir.Ib01205.1.p|PACid:30241015	0.28028	1.21443055967739	<.0001	13	Cell wall synthesis / modification	cell wall.precursor synthesis.UXS	AT2G28760.1	UDP-XYL synthase 6	LOC_Os03g16980.1	NAD dependent epimerase/dehydratase family domain containing protein, expressed
RT1/D1W	309	Pavir.J20903.1	30284869	Pavir.J20903.1.p|PACid:30284869	0.39369	1.31374930411419	0.0002	2	Amino acid metabolism	amino acid metabolism.synthesis.branched chain group.common.ketol-acid reductoisomerase	AT3G58610.1	ketol-acid reductoisomerase	LOC_Os01g46380.1	ketol-acid reductoisomerase, chloroplast precursor, putative, expressed
RT1/D1W	310	Pavir.J04423.1	30259701	Pavir.J04423.1.p|PACid:30259701	0.44615	1.36239967880127	<.0001	29	TCA cycle	TCA / org transformation.TCA.aconitase	AT2G05710.1	aconitase 3	LOC_Os03g04410.1	aconitate hydratase protein, putative, expressed
RT1/D1W	311	Pavir.J05875.1	30190514	Pavir.J05875.1.p|PACid:30190514	0.06526	1.04627348039618	0.5121	20	Carbohydrates metabolism	C1-metabolism.glycine hydroxymethyltransferase	AT4G37930.1	serine transhydroxymethyltransferase 1	LOC_Os03g52840.1	serine hydroxymethyltransferase, mitochondrial precursor, putative, expressed
RT1/D1W	312	Pavir.J37823.1	30199614	Pavir.J37823.1.p|PACid:30199614	-0.13946	0.907858902842513	0.1563	8	Abiotic/biotic stress	stress.abiotic.heat	AT5G56030.1	heat shock protein 81-2	LOC_Os08g39140.1	heat shock protein, putative, expressed
RT1/D1W	313	Pavir.J02207.1	30225449	Pavir.J02207.1.p|PACid:30225449	-0.6523	0.636265146263054	<.0001	18	Glyoxylate cycle	gluconeogenesis / glyoxylate cycle.pyruvate dikinase	AT4G15530.1	pyruvate orthophosphate dikinase	LOC_Os05g33570.2	pyruvate, phosphate dikinase, chloroplast precursor, putative, expressed
RT1/D1W	314	Pavir.Ab01211.1	30235576	Pavir.Ab01211.1.p|PACid:30235576	0.25311	1.19177343929388	<.0001	44	Functional enzyme	misc.peroxidases	AT5G05340.1	Peroxidase superfamily protein	LOC_Os02g14160.1	peroxidase precursor, putative, expressed
RT1/D1W	316	Pavir.Ia00394.1	30212391	Pavir.Ia00394.1.p|PACid:30212391	-0.01577	0.989128594501964	0.8812	6	Cell wall synthesis / modification	cell wall.precursor synthesis.UDP-Glc dehydrogenase (UGD)	AT3G29360.1	UDP-glucose 6-dehydrogenase family protein	LOC_Os12g25700.1	UDP-glucose 6-dehydrogenase, putative, expressed
RT1/D1W	318	Pavir.Ib01670.1	30237750	Pavir.Ib01670.1.p|PACid:30237750	1.3292	2.51263306304881	<.0001	43	Redox balance	redox.dismutases and catalases	AT1G08830.1	copper/zinc superoxide dismutase 1	LOC_Os03g22810.1	copper/zinc superoxide dismutase, putative, expressed
RT1/D1W	319	Pavir.J23717.1	30196724	Pavir.J23717.1.p|PACid:30196724	0.30762	1.23766425217569	<.0001	38	Protein synthesis	protein.synthesis.ribosomal protein.eukaryotic.40S subunit.S15	AT5G09510.1	Ribosomal protein S19 family protein	LOC_Os07g08660.1	40S ribosomal protein S15, putative, expressed
RT1/D1W	320	Pavir.Ib01120.1	30238695	Pavir.Ib01120.1.p|PACid:30238695	0.05606	1.0396226709676	0.6103	13	Amino acid metabolism	amino acid metabolism.synthesis.aromatic aa.tryptophan.anthranilate synthase	AT2G29690.1	anthranilate synthase 2	LOC_Os03g15780.1	anthranilate synthase component I-1, chloroplast precursor, putative, expressed
RT1/D1W	321	Pavir.Aa00420.1	30251486	Pavir.Aa00420.1.p|PACid:30251486	0.19934	1.14817297194435	<.0001	134	Ammonia metabolism	N-metabolism.ammonia metabolism.glutamine synthetase	AT5G37600.1	glutamine synthase clone R1	LOC_Os02g50240.1	glutamine synthetase, catalytic domain containing protein, expressed
RT1/D1W	322	Pavir.Ga02700.1	30303492	Pavir.Ga02700.1.p|PACid:30303492	0.7488	1.68039453617181	<.0001	4	Phyto-hormone metabolism	hormone metabolism.auxin.induced-regulated-responsive-activated	AT1G60710.1	NAD(P)-linked oxidoreductase superfamily protein	LOC_Os04g26910.1	oxidoreductase, aldo/keto reductase family protein, putative, expressed
RT1/D1W	323	Pavir.Ab00721.1	30235729	Pavir.Ab00721.1.p|PACid:30235729	0.52475	1.43868425342545	<.0001	20	Protein degradation	protein.degradation.ubiquitin.proteasom	AT1G45000.1	AAA-type ATPase family protein	LOC_Os02g10640.1	26S protease regulatory subunit, putative, expressed
RT1/D1W	324	Pavir.J00520.1	30246046	Pavir.J00520.1.p|PACid:30246046	-0.35783	0.78033742583311	<.0001	46			AT4G13850.1	glycine-rich RNA-binding protein 2	LOC_Os01g68790.2	RNA recognition motif containing protein, putative, expressed
RT1/D1W	326	Pavir.J00040.1	30196781	Pavir.J00040.1.p|PACid:30196781	0.04291	1.03018968503865	0.0367	130	Cell division & Cell cycle	cell.cycle.peptidylprolyl isomerase	AT2G29960.1	cyclophilin 5	LOC_Os06g49480.1	peptidyl-prolyl cis-trans isomerase, putative, expressed
RT1/D1W	328	Pavir.J04576.1	30281447	Pavir.J04576.1.p|PACid:30281447	0.12675	1.09183132939987	0.0493	16	Abiotic/biotic stress	stress.abiotic.heat	AT1G79920.1	Heat shock protein 70 (Hsp 70) family protein	LOC_Os01g08560.1	DnaK family protein, putative, expressed
RT1/D1W	329	Pavir.J00603.1	30225622	Pavir.J00603.1.p|PACid:30225622	-0.05292	0.963983260840943	0.2019	45	Signaling regulation	signalling.calcium	AT1G21630.1	Calcium-binding EF hand family protein	LOC_Os06g51250.1	EF hand family protein, putative, expressed
RT1/D1W	331	Pavir.J01844.1	30301740	Pavir.J01844.1.p|PACid:30301740	0.45954	1.37510329970458	<.0001	120			AT3G02530.1	TCP-1/cpn60 chaperonin family protein	LOC_Os05g05470.1	T-complex protein, putative, expressed
RT1/D1W	333	Pavir.J31266.1	30315516	Pavir.J31266.1.p|PACid:30315516	0.005291	1.00367417502558	0.9849	4	Abiotic/biotic stress	stress.abiotic.unspecified	AT1G70840.1	MLP-like protein 31	LOC_Os12g36830.1	pathogenesis-related Bet v I family protein, putative, expressed
RT1/D1W	334	Pavir.Fb01277.1	30280941	Pavir.Fb01277.1.p|PACid:30280941	0.03032	1.02123861856153	0.5707	13	Lipids metabolism	lipid metabolism.FA synthesis and FA elongation.enoyl ACP reductase	AT2G05990.1	NAD(P)-binding Rossmann-fold superfamily protein	LOC_Os08g23810.1	enoyl-acyl-carrier-protein reductase NADH, chloroplast precursor, expressed
RT1/D1W	336	Pavir.J08809.1	30307258	Pavir.J08809.1.p|PACid:30307258	-0.14779	0.902632105849262	0.0045	14	TCA cycle	TCA / org transformation.TCA.pyruvate DH.E1	AT1G59900.1	pyruvate dehydrogenase complex E1 alpha subunit	LOC_Os02g50620.1	dehydrogenase E1 component domain containing protein, expressed
RT1/D1W	337	Pavir.Da01210.1	30193057	Pavir.Da01210.1.p|PACid:30193057	0.25861	1.19632551994703	<.0001	62	Functional enzyme	misc.dynamin	AT1G10290.1	dynamin-like protein 6	LOC_Os06g13820.1	dynamin, putative, expressed
RT1/D1W	338	Pavir.Ea03950.1	30228219	Pavir.Ea03950.1.p|PACid:30228219	-0.63014	0.646113713010671	<.0001	52			AT4G13850.1	glycine-rich RNA-binding protein 2	LOC_Os01g68790.2	RNA recognition motif containing protein, putative, expressed
RT1/D1W	339	Pavir.Bb01264.1	30298125	Pavir.Bb01264.1.p|PACid:30298125	0.21497	1.1606797784753	0.0002	19	Glycolysis	glycolysis.cytosolic branch.enolase	AT2G36530.1	Enolase	LOC_Os06g04510.1	enolase, putative, expressed
RT1/D1W	340	Pavir.Fb01524.1	30279289	Pavir.Fb01524.1.p|PACid:30279289	-0.18843	0.87756019892389	0.0007	25	Amino acid metabolism	amino acid metabolism.synthesis.serine-glycine-cysteine group.serine.phosphoglycerate dehydrogenase	AT1G17745.2	D-3-phosphoglycerate dehydrogenase	LOC_Os08g34720.1	D-3-phosphoglycerate dehydrogenase, chloroplast precursor, putative, expressed
RT1/D1W	341	Pavir.Ia00634.1	30209499	Pavir.Ia00634.1.p|PACid:30209499	0.01645	1.01146752479107	0.8956	14	Carbohydrates metabolism	C1-metabolism.glycine hydroxymethyltransferase	AT4G37930.1	serine transhydroxymethyltransferase 1	LOC_Os03g52840.1	serine hydroxymethyltransferase, mitochondrial precursor, putative, expressed
RT1/D1W	342	Pavir.Aa02893.1	30253410	Pavir.Aa02893.1.p|PACid:30253410	-0.02882	0.980221706536988	0.6743	17			AT2G25970.1	KH domain-containing protein	LOC_Os02g13130.1	KH domain-containing protein, putative, expressed
RT1/D1W	343	Pavir.J06411.1	30199136	Pavir.J06411.1.p|PACid:30199136	0.41297	1.33142392676628	<.0001	23	Glycolysis	glycolysis.cytosolic branch.UGPase	AT5G17310.2	UDP-glucose pyrophosphorylase 2	LOC_Os09g38030.1	UTP--glucose-1-phosphate uridylyltransferase, putative, expressed
RT1/D1W	344	Pavir.Ia03418.1	30210801	Pavir.Ia03418.1.p|PACid:30210801	0.07504	1.053390241729	<.0001	102	TCA cycle	TCA / org transformation.TCA.fumarase	AT2G47510.1	fumarase 1	LOC_Os03g21950.1	fumarate hydratase, mitochondrial precursor, putative, expressed
RT1/D1W	345	Pavir.J40704.1	30246796	Pavir.J40704.1.p|PACid:30246796	1.6632	3.16718249777658	<.0001	5	Abiotic/biotic stress	stress.abiotic.heat	AT1G74310.1	heat shock protein 101	LOC_Os05g44340.1	heat shock protein 101, putative, expressed
RT1/D1W	346	Pavir.Fa01133.1	30188258	Pavir.Fa01133.1.p|PACid:30188258	0.21714	1.1624269046555	<.0001	15	Lipids metabolism	lipid metabolism.FA synthesis and FA elongation.enoyl ACP reductase	AT2G05990.1	NAD(P)-binding Rossmann-fold superfamily protein	LOC_Os08g23810.1	enoyl-acyl-carrier-protein reductase NADH, chloroplast precursor, expressed
RT1/D1W	348	Pavir.J11244.1	30296285	Pavir.J11244.1.p|PACid:30296285	-0.25352	0.838847231422229	<.0001	16	Cell wall synthesis / modification	cell wall.precursor synthesis.UXS	AT3G62830.1	NAD(P)-binding Rossmann-fold superfamily protein	LOC_Os05g29990.1	NAD dependent epimerase/dehydratase family domain containing protein, expressed
RT1/D1W	349	Pavir.J04551.1	30285341	Pavir.J04551.1.p|PACid:30285341	-0.36891	0.774367333894539	<.0001	99	Abiotic/biotic stress	stress.abiotic.unspecified	AT1G20450.1	Dehydrin family protein	LOC_Os02g44870.1	dehydrin, putative, expressed
RT1/D1W	350	Pavir.Bb00670.1	30299210	Pavir.Bb00670.1.p|PACid:30299210	0.2138	1.15973886941541	0.0476	14	RNA processing	RNA.processing.RNA helicase	AT2G42520.1	P-loop containing nucleoside triphosphate hydrolases superfamily protein	N	N
RT1/D1W	352	Pavir.Bb02408.1	30296941	Pavir.Bb02408.1.p|PACid:30296941	0.08114	1.05785361339269	0.3637	12	Abiotic/biotic stress	stress.abiotic.heat	AT5G56030.1	heat shock protein 81-2	LOC_Os08g39140.1	heat shock protein, putative, expressed
RT1/D1W	353	Pavir.J02507.1	30248656	Pavir.J02507.1.p|PACid:30248656	0.5803	1.49516012611901	0.0002	8	Abiotic/biotic stress	stress.abiotic.heat	AT1G79920.1	Heat shock protein 70 (Hsp 70) family protein	LOC_Os01g08560.1	DnaK family protein, putative, expressed
RT1/D1W	354	Pavir.Ea00383.1	30226644	Pavir.Ea00383.1.p|PACid:30226644	0.40387	1.32305221544792	<.0001	60	Redox balance	redox.misc	AT5G20080.1	FAD/NAD(P)-binding oxidoreductase	LOC_Os01g07910.1	NADH-cytochrome b5 reductase, putative, expressed
RT1/D1W	355	Pavir.Eb02349.1	30313824	Pavir.Eb02349.1.p|PACid:30313824	0.15988	1.11719420860555	0.0036	26	Cell wall synthesis / modification	cell wall.precursor synthesis.UXS	AT3G62830.1	NAD(P)-binding Rossmann-fold superfamily protein	LOC_Os01g21320.1	NAD dependent epimerase/dehydratase family domain containing protein, expressed
RT1/D1W	357	Pavir.J02298.1	30207734	Pavir.J02298.1.p|PACid:30207734	-0.54558	0.68511591314185	<.0001	35	Major CHO metabolism	major CHO metabolism.degradation.sucrose.fructokinase	AT4G10260.1	pfkB-like carbohydrate kinase family protein	LOC_Os08g02120.1	kinase, pfkB family, putative, expressed
RT1/D1W	358	Pavir.Ha00131.1	30318651	Pavir.Ha00131.1.p|PACid:30318651	-0.12209	0.918855560498373	0.1317	19			AT3G07810.2	RNA-binding (RRM/RBD/RNP motifs) family protein	LOC_Os11g41890.1	RNA recognition motif containing protein, putative, expressed
RT1/D1W	359	Pavir.Ia03158.1	30213052	Pavir.Ia03158.1.p|PACid:30213052	0.09868	1.07079328729748	0.3586	6	RNA processing	RNA.processing.RNA helicase	AT2G42520.1	P-loop containing nucleoside triphosphate hydrolases superfamily protein	N	N
RT1/D1W	360	Pavir.Fa00827.1	30186007	Pavir.Fa00827.1.p|PACid:30186007	-0.11608	0.922691326363869	0.0448	22	Amino acid metabolism	amino acid metabolism.synthesis.serine-glycine-cysteine group.serine.phosphoglycerate dehydrogenase	AT1G17745.2	D-3-phosphoglycerate dehydrogenase	LOC_Os08g34720.1	D-3-phosphoglycerate dehydrogenase, chloroplast precursor, putative, expressed
RT1/D1W	361	Pavir.Ba00389.1	30289020	Pavir.Ba00389.1.p|PACid:30289020	-0.1583	0.896080345524943	0.001	28	Amino acid metabolism	amino acid metabolism.synthesis.aromatic aa.chorismate.3-deoxy-D-arabino-heptulosonate 7-phosphate synthase	AT1G22410.1	Class-II DAHP synthetase family protein	LOC_Os07g42960.1	phospho-2-dehydro-3-deoxyheptonate aldolase, chloroplast precursor, putative, expressed
RT1/D1W	362	Pavir.J20944.1	30247230	Pavir.J20944.1.p|PACid:30247230	0.24561	1.18559395755478	<.0001	67	Protein synthesis	protein.synthesis.initiation	AT3G60240.3	eukaryotic translation initiation factor 4G	LOC_Os07g36940.1	eukaryotic translation initiation factor 4G, putative, expressed
RT1/D1W	363	Pavir.Ia03849.1	30211097	Pavir.Ia03849.1.p|PACid:30211097	0.02806	1.01964008775552	0.7854	4	Amino acid metabolism	amino acid metabolism.synthesis.aromatic aa.tryptophan.anthranilate synthase	AT2G29690.1	anthranilate synthase 2	LOC_Os03g15780.1	anthranilate synthase component I-1, chloroplast precursor, putative, expressed
RT1/D1W	364	Pavir.Ca01047.1	30205606	Pavir.Ca01047.1.p|PACid:30205606	0.32406	1.25184852048774	<.0001	15	Abiotic/biotic stress	stress.abiotic.heat	AT1G79920.1	Heat shock protein 70 (Hsp 70) family protein	LOC_Os01g08560.1	DnaK family protein, putative, expressed
RT1/D1W	365	Pavir.J17122.1	30247897	Pavir.J17122.1.p|PACid:30247897	0.20658	1.1539494287593	<.0001	30	Protein degradation	protein.degradation.serine protease	AT5G50920.1	CLPC homologue 1	LOC_Os04g32560.1	ATP-dependent Clp protease ATP-binding subunit clpA homolog CD4B,chloroplast precursor, putative, expressed
RT1/D1W	366	Pavir.Da01209.1	30192995	Pavir.Da01209.1.p|PACid:30192995	0.0475	1.03347249989918	0.3979	25	Glycolysis	glycolysis.cytosolic branch.pyrophosphate-fructose-6-P phosphotransferase	AT1G12000.1	Phosphofructokinase family protein	LOC_Os06g13810.1	pyrophosphate--fructose 6-phosphate 1-phosphotransferase subunit beta, putative, expressed
RT1/D1W	367	Pavir.Bb03363.1	30301293	Pavir.Bb03363.1.p|PACid:30301293	-0.30017	0.812156690217179	0.0002	17	Amino acid metabolism	amino acid metabolism.synthesis.aromatic aa.chorismate.3-deoxy-D-arabino-heptulosonate 7-phosphate synthase	AT1G22410.1	Class-II DAHP synthetase family protein	LOC_Os07g42960.1	phospho-2-dehydro-3-deoxyheptonate aldolase, chloroplast precursor, putative, expressed
RT1/D1W	368	Pavir.J00158.1	30282759	Pavir.J00158.1.p|PACid:30282759	3.49971	11.311434528648	<.0001	50	Development	development.late embryogenesis abundant	AT3G15670.1	Late embryogenesis abundant protein (LEA) family protein	LOC_Os05g46480.1	late embryogenesis abundant protein, group 3, putative, expressed
RT1/D1W	369	Pavir.Fa02358.1	30187553	Pavir.Fa02358.1.p|PACid:30187553	0.34665	1.27160447614999	0.0006	5	Amino acid metabolism	amino acid metabolism.degradation.aspartate family.methionine	AT3G23810.1	S-adenosyl-l-homocysteine (SAH) hydrolase 2	LOC_Os11g26850.2	erythronate-4-phosphate dehydrogenase, putative, expressed
RT1/D1W	370	Pavir.Ia04629.1	30209089	Pavir.Ia04629.1.p|PACid:30209089	-0.127	0.915733686418126	0.2796	9	Transport	transport.porins	AT5G67500.2	voltage dependent anion channel 2	LOC_Os03g10510.2	outer mitochondrial membrane porin, putative, expressed
RT1/D1W	371	Pavir.Ia00476.1	30214263	Pavir.Ia00476.1.p|PACid:30214263	-0.03826	0.973828750998176	0.6656	10	Nucleotide metabolism	nucleotide metabolism.synthesis.purine.IMP dehydrogenase	AT1G16350.1	Aldolase-type TIM barrel family protein	LOC_Os03g56800.1	CBS domain containing membrane protein, putative, expressed
RT1/D1W	372	Pavir.J33035.1	30207716	Pavir.J33035.1.p|PACid:30207716	-0.16293	0.893209190081595	0.0552	13	Unclassified	not assigned.no ontology	AT3G12050.1	Aha1 domain-containing protein	LOC_Os08g36150.1	activator of 90 kDa heat shock protein ATPase homolog, putative, expressed
RT1/D1W	373	Pavir.J11329.1	30271593	Pavir.J11329.1.p|PACid:30271593	-0.23764	0.848131575033755	<.0001	29	Abiotic/biotic stress	stress.abiotic.heat	AT5G56030.2	heat shock protein 81-2	LOC_Os08g39140.1	heat shock protein, putative, expressed
RT1/D1W	374	Pavir.J20251.1	30247636	Pavir.J20251.1.p|PACid:30247636	0.21394	1.159851416638	<.0001	64	Functional enzyme	misc.gluco-, galacto- and mannosidases	AT2G44450.1	beta glucosidase 15	LOC_Os04g39900.1	Os4bglu13 - beta-glucosidase homologue, similar to Os4Bglu12 exoglucanase/b-glucosidase, expressed
RT1/D1W	376	Pavir.Eb02357.1	30312223	Pavir.Eb02357.1.p|PACid:30312223	0.02469	1.01726108400455	0.6281	21	TCA cycle	TCA / org transformation.TCA.pyruvate DH.E3	AT3G16950.1	lipoamide dehydrogenase 1	LOC_Os01g23610.1	dihydrolipoyl dehydrogenase, putative, expressed
RT1/D1W	377	Pavir.Ca01649.1	30207020	Pavir.Ca01649.1.p|PACid:30207020	0.41247	1.33096257034739	0.0004	4	Major CHO metabolism	major CHO metabolism.degradation.sucrose.hexokinase	AT4G29130.1	hexokinase 1	LOC_Os05g44760.1	hexokinase, putative, expressed
RT1/D1W	378	Pavir.Cb01805.1	30268747	Pavir.Cb01805.1.p|PACid:30268747	1.1576	2.23086003315925	<.0001	8	Nucleotide metabolism	nucleotide metabolism.phosphotransfer and pyrophosphatases.adenylate kinase	AT5G63400.1	adenylate kinase 1	LOC_Os11g20790.1	adenylate kinase, putative, expressed
RT1/D1W	379	Pavir.Ib02877.1	30238824	Pavir.Ib02877.1.p|PACid:30238824	0.18781	1.13903335896913	0.0005	24	Abiotic/biotic stress	stress.abiotic.heat	AT1G79920.1	Heat shock protein 70 (Hsp 70) family protein	LOC_Os01g08560.1	DnaK family protein, putative, expressed
RT1/D1W	381	Pavir.Ib01071.1	30237963	Pavir.Ib01071.1.p|PACid:30237963	-0.15499	0.89813859828473	0.0382	14	Amino acid metabolism	amino acid metabolism.synthesis.aromatic aa.chorismate.chorismate synthase	AT1G48850.1	chorismate synthase, putative / 5-enolpyruvylshikimate-3-phosphate phospholyase, putative	LOC_Os03g14990.1	chorismate synthase 2, chloroplast precursor, putative, expressed
RT1/D1W	383	Pavir.Hb01549.1	30266584	Pavir.Hb01549.1.p|PACid:30266584	0.08462	1.06040839732627	0.2105	28	Protein targeting & vesicle tansport	cell.vesicle transport	AT1G21380.1	Target of Myb protein 1	LOC_Os11g09329.1	VHS and GAT domain containing protein, expressed
RT1/D1W	384	Pavir.Ba03902.1	30291477	Pavir.Ba03902.1.p|PACid:30291477	0.05667	1.04006233693996	0.0477	73	Unclassified	not assigned.no ontology	AT5G42950.1	GYF domain-containing protein	LOC_Os07g04530.1	GYF domain containing protein, putative, expressed
RT1/D1W	385	Pavir.Ca00410.1	30204010	Pavir.Ca00410.1.p|PACid:30204010	0.6936	1.61731421983763	0.0058	2	Nucleotide metabolism	nucleotide metabolism.phosphotransfer and pyrophosphatases.adenylate kinase	AT5G63400.1	adenylate kinase 1	LOC_Os11g20790.1	adenylate kinase, putative, expressed
RT1/D1W	386	Pavir.Fa00956.1	30188202	Pavir.Fa00956.1.p|PACid:30188202	0.57969	1.49452807647417	<.0001	43	Secondary metabolism	secondary metabolism.N misc.betaine.betaine-aldehyde dehydrogenase	AT1G74920.1	aldehyde dehydrogenase 10A8	LOC_Os08g32870.1	aldehyde dehydrogenase, putative, expressed
RT1/D1W	387	Pavir.Fa00702.1	30186601	Pavir.Fa00702.1.p|PACid:30186601	-0.18703	0.878412201980209	0.0052	9	Unclassified	not assigned.no ontology	AT3G12050.1	Aha1 domain-containing protein	LOC_Os08g36150.1	activator of 90 kDa heat shock protein ATPase homolog, putative, expressed
RT1/D1W	388	Pavir.Aa02779.1	30253897	Pavir.Aa02779.1.p|PACid:30253897	0.38413	1.30507254134657	<.0001	33	Functional enzyme	misc.peroxidases	AT5G05340.1	Peroxidase superfamily protein	LOC_Os02g14160.1	peroxidase precursor, putative, expressed
RT1/D1W	389	Pavir.Ib01813.1	30239425	Pavir.Ib01813.1.p|PACid:30239425	-0.20519	0.867424441596132	<.0001	112	Major CHO metabolism	major CHO metabolism.degradation.sucrose.Susy	AT3G43190.1	sucrose synthase 4	LOC_Os03g28330.1	sucrose synthase, putative, expressed
RT1/D1W	390	Pavir.Bb03568.1	30297891	Pavir.Bb03568.1.p|PACid:30297891	0.73445	1.66376307052968	<.0001	19	Protein synthesis	protein.synthesis.elongation	AT1G07930.1	GTP binding Elongation factor Tu family protein	LOC_Os03g08020.1	elongation factor Tu, putative, expressed
RT1/D1W	391	Pavir.Ib00512.1	30238948	Pavir.Ib00512.1.p|PACid:30238948	0.10783	1.07760615781814	0.1242	12	Protein synthesis	protein.synthesis.ribosomal protein.eukaryotic.40S subunit.SA	AT1G72370.1	40s ribosomal protein SA	LOC_Os03g08440.1	ribosomal protein S2, putative, expressed
RT1/D1W	392	Pavir.J03960.1	30225805	Pavir.J03960.1.p|PACid:30225805	-0.1509	0.900688408647389	0.4825	6	Phyto-hormone metabolism	hormone metabolism.auxin.induced-regulated-responsive-activated	AT1G60730.1	NAD(P)-linked oxidoreductase superfamily protein	LOC_Os04g26910.1	oxidoreductase, aldo/keto reductase family protein, putative, expressed
RT1/D1W	393	Pavir.Cb02102.1	30269699	Pavir.Cb02102.1.p|PACid:30269699	0.46983	1.38494626332389	<.0001	44	Glycolysis	glycolysis.cytosolic branch.pyruvate kinase (PK)	AT3G52990.1	Pyruvate kinase family protein	LOC_Os11g05110.1	pyruvate kinase, putative, expressed
RT1/D1W	394	Pavir.J00504.1	30220221	Pavir.J00504.1.p|PACid:30220221	-0.16599	0.891316674011955	0.0798	4	Major CHO metabolism	major CHO metabolism.degradation.sucrose.hexokinase	AT4G29130.1	hexokinase 1	LOC_Os05g44760.1	hexokinase, putative, expressed
RT1/D1W	395	Pavir.J01583.1	30281749	Pavir.J01583.1.p|PACid:30281749	0.14436	1.10524024429024	0.139	4	Protein degradation	protein.degradation.ubiquitin.proteasom	AT1G53750.1	regulatory particle triple-A 1A	LOC_Os02g54340.1	26S protease regulatory subunit 7, putative, expressed
RT1/D1W	398	Pavir.J14138.1	30219767	Pavir.J14138.1.p|PACid:30219767	0.31855	1.24707652783197	0.0006	6	Protein targeting & vesicle tansport	protein.targeting.mitochondria	AT3G16480.1	mitochondrial processing peptidase alpha subunit	LOC_Os01g53700.1	mitochondrial-processing peptidase subunit, mitochondrial precursor, putative, expressed
RT1/D1W	400	Pavir.J04561.1	30277875	Pavir.J04561.1.p|PACid:30277875	0.0807	1.05753103335638	0.1374	21	Protein synthesis	protein.synthesis.ribosomal protein.eukaryotic.60S subunit.L12	AT2G37190.1	Ribosomal protein L11 family protein	LOC_Os02g47140.1	L11 domain containing ribosomal protein, putative, expressed
RT1/D1W	401	Pavir.J01685.1	30190683	Pavir.J01685.1.p|PACid:30190683	0.60899	1.52519108140067	<.0001	28	Abiotic/biotic stress	stress.abiotic.heat	AT4G24280.1	chloroplast heat shock protein 70-1	LOC_Os05g23740.1	DnaK family protein, putative, expressed
RT1/D1W	402	Pavir.J03499.1	30220672	Pavir.J03499.1.p|PACid:30220672	0.45449	1.37029831195954	<.0001	26	Cell division & Cell cycle	cell.cycle.peptidylprolyl isomerase	AT5G13120.1	cyclophilin 20-2	LOC_Os05g01270.1	peptidyl-prolyl cis-trans isomerase, putative, expressed
RT1/D1W	403	Pavir.Ia03413.1	30215648	Pavir.Ia03413.1.p|PACid:30215648	0.03863	1.02713798121216	0.6005	5			AT3G11830.1	TCP-1/cpn60 chaperonin family protein	LOC_Os06g47320.1	T-complex protein, putative, expressed
RT1/D1W	405	Pavir.Aa01840.1	30253158	Pavir.Aa01840.1.p|PACid:30253158	0.14518	1.10586862006217	<.0001	63			AT3G13860.1	heat shock protein 60-3A	LOC_Os05g46290.1	T-complex protein, putative, expressed
RT1/D1W	406	Pavir.J04679.1	30198660	Pavir.J04679.1.p|PACid:30198660	-0.1627	0.893351600282388	0.0028	22	Glycolysis	glycolysis.cytosolic branch.pyrophosphate-fructose-6-P phosphotransferase	AT1G12000.1	Phosphofructokinase family protein	LOC_Os06g13810.1	pyrophosphate--fructose 6-phosphate 1-phosphotransferase subunit beta, putative, expressed
RT1/D1W	407	Pavir.J00639.1	30255563	Pavir.J00639.1.p|PACid:30255563	1.62516	3.0847637430925	<.0001	42	Cell organization	cell.organisation	AT5G09810.1	actin 7	LOC_Os05g36290.1	actin, putative, expressed
RT1/D1W	408	Pavir.J37949.1	30218124	Pavir.J37949.1.p|PACid:30218124	0.32331	1.25119790316313	<.0001	14	Protein synthesis	protein.synthesis.elongation	AT1G09640.1	Translation elongation factor EF1B, gamma chain	LOC_Os06g37440.1	elongation factor 1-gamma, putative, expressed
RT1/D1W	409	Pavir.Ba00210.1	30288428	Pavir.Ba00210.1.p|PACid:30288428	-0.04321	0.970493193617263	0.6042	13	Cell wall synthesis / modification	cell wall.precursor synthesis.UXS	AT3G62830.1	NAD(P)-binding Rossmann-fold superfamily protein	LOC_Os07g47700.1	NAD dependent epimerase/dehydratase family domain containing protein, expressed
RT1/D1W	410	Pavir.Ia04061.1	30215658	Pavir.Ia04061.1.p|PACid:30215658	0.09524	1.06824310119384	0.4462	4	Protein synthesis	protein.synthesis.ribosomal protein.eukaryotic.40S subunit.S7	AT1G48830.1	Ribosomal protein S7e family protein	LOC_Os03g18570.1	40S ribosomal protein S7, putative, expressed
RT1/D1W	411	Pavir.J00554.1	30246895	Pavir.J00554.1.p|PACid:30246895	-0.14509	0.90432296119941	0.1145	14	RNA synthesis	RNA.transcription	AT4G10070.1	KH domain-containing protein	LOC_Os08g01930.1	KH domain-containing protein, putative, expressed
RT1/D1W	412	Pavir.J05124.1	30282534	Pavir.J05124.1.p|PACid:30282534	-0.43267	0.740889349599526	<.0001	114	Nucleotide metabolism	nucleotide metabolism.phosphotransfer and pyrophosphatases.uridylate kinase	AT5G26667.2	P-loop containing nucleoside triphosphate hydrolases superfamily protein	LOC_Os02g53790.1	adenylate kinase, putative, expressed
RT1/D1W	413	Pavir.Cb01376.1	30269049	Pavir.Cb01376.1.p|PACid:30269049	-0.1445	0.904692865889194	0.518	3	Cell wall synthesis / modification	cell wall.precursor synthesis.UXS	AT3G62830.1	NAD(P)-binding Rossmann-fold superfamily protein	LOC_Os05g29990.1	NAD dependent epimerase/dehydratase family domain containing protein, expressed
RT1/D1W	414	Pavir.Ba00725.1	30289343	Pavir.Ba00725.1.p|PACid:30289343	0.69261	1.61620477411706	<.0001	58	DNA synthesis	DNA.synthesis/chromatin structure.histone.core.H2A	AT4G27230.1	histone H2A 2	LOC_Os07g36140.1	core histone H2A/H2B/H3/H4, putative, expressed
RT1/D1W	415	Pavir.Ea00724.1	30229059	Pavir.Ea00724.1.p|PACid:30229059	-0.15714	0.896801129314941	0.0711	10	Calvin cycle	PS.calvin cycle.aldolase	AT2G01140.1	Aldolase superfamily protein	LOC_Os01g02880.1	fructose-bisphospate aldolase isozyme, putative, expressed
RT1/D1W	416	Pavir.Ca01968.1	30203843	Pavir.Ca01968.1.p|PACid:30203843	-0.39094	0.762632542964432	0.0002	5	Calvin cycle	PS.calvin cycle.rubisco interacting	AT2G28000.1	chaperonin-60alpha	LOC_Os12g17910.1	T-complex protein, putative, expressed
RT1/D1W	417	Pavir.Ba00102.1	30289865	Pavir.Ba00102.1.p|PACid:30289865	-0.20714	0.86625279062613	<.0001	97	Protein synthesis	protein.synthesis.ribosomal protein.eukaryotic.60S subunit.P0	AT2G40010.1	Ribosomal protein L10 family protein	LOC_Os08g03640.1	60S acidic ribosomal protein P0, putative, expressed
RT1/D1W	418	Pavir.J24463.1	30295856	Pavir.J24463.1.p|PACid:30295856	1.1808	2.26702452743997	0.0009	3	Redox balance	redox.dismutases and catalases	AT3G10920.1	manganese superoxide dismutase 1	LOC_Os05g25850.1	superoxide dismutase, mitochondrial precursor, putative, expressed
RT1/D1W	419	Pavir.Cb01090.1	30267976	Pavir.Cb01090.1.p|PACid:30267976	-0.01223	0.991558640039502	0.8894	6	Calvin cycle	PS.calvin cycle.rubisco interacting	AT2G28000.1	chaperonin-60alpha	LOC_Os12g17910.1	T-complex protein, putative, expressed
RT1/D1W	421	Pavir.J01810.1	30274650	Pavir.J01810.1.p|PACid:30274650	0.10281	1.0738630367311	0.1759	8	Nucleotide metabolism	nucleotide metabolism.synthesis.purine.IMP dehydrogenase	AT1G16350.1	Aldolase-type TIM barrel family protein	LOC_Os03g56800.1	CBS domain containing membrane protein, putative, expressed
RT1/D1W	423	Pavir.Aa00887.1	30253439	Pavir.Aa00887.1.p|PACid:30253439	-0.0164	0.988696753428805	0.6972	75	Abiotic/biotic stress	stress.abiotic.unspecified	AT1G20450.1	Dehydrin family protein	LOC_Os02g44870.1	dehydrin, putative, expressed
RT1/D1W	424	Pavir.Gb01966.1	30223831	Pavir.Gb01966.1.p|PACid:30223831	0.25426	1.19272380357961	<.0001	23	Unclassified	not assigned.unknown	AT2G43180.4	Phosphoenolpyruvate carboxylase family protein	LOC_Os04g31700.1	methylisocitrate lyase 2, putative, expressed
RT1/D1W	425	Pavir.J39478.1	30256098	Pavir.J39478.1.p|PACid:30256098	0.3405	1.26619534780333	0.0099	4	Amino acid metabolism	amino acid metabolism.synthesis.serine-glycine-cysteine group.cysteine.OASTL	AT4G14880.1	O-acetylserine (thiol) lyase (OAS-TL) isoform A1	LOC_Os12g42980.1	cysteine synthase, putative, expressed
RT1/D1W	426	Pavir.Ea01555.1	30230998	Pavir.Ea01555.1.p|PACid:30230998	0.51991	1.43386579602266	<.0001	13	Nucleotide metabolism	nucleotide metabolism.synthesis.pyrimidine.carbamoyl phosphate synthetase	AT1G29900.1	carbamoyl phosphate synthetase B	LOC_Os01g38970.1	carbamoyl-phosphate synthase large chain, putative, expressed
RT1/D1W	427	Pavir.Ia01656.1	30212157	Pavir.Ia01656.1.p|PACid:30212157	1.0013	2.00180299487899	<.0001	56	Secondary metabolism	secondary metabolism.N misc.cyanogenic glycosides.cyanase	AT3G23490.1	cyanase	LOC_Os10g33270.1	cyanate hydratase, putative, expressed
RT1/D1W	428	Pavir.Aa00086.1	30249737	Pavir.Aa00086.1.p|PACid:30249737	-0.1283	0.914908898388858	0.5512	2			AT5G04430.2	binding to TOMV RNA 1L (long form)	LOC_Os02g57640.1	KH domain containing protein, putative, expressed
RT1/D1W	429	Pavir.Eb01120.1	30312506	Pavir.Eb01120.1.p|PACid:30312506	-0.17102	0.88821448248977	0.0348	16	Protein modification	protein.postranslational modification	AT4G11260.1	phosphatase-related	LOC_Os01g43540.1	suppressor of G2 allele of SKP1, putative, expressed
RT1/D1W	430	Pavir.Ib00038.1	30238568	Pavir.Ib00038.1.p|PACid:30238568	1.55514	2.93862241841891	<.0001	152	DNA synthesis	DNA.synthesis/chromatin structure.histone.core.H4	AT3G53730.1	Histone superfamily protein	LOC_Os03g02780.1	Core histone H2A/H2B/H3/H4 domain containing protein, putative, expressed
RT1/D1W	431	Pavir.J33631.1	30275249	Pavir.J33631.1.p|PACid:30275249	-0.10503	0.929785608063954	0.0283	37			AT4G16830.1	Hyaluronan / mRNA binding family	LOC_Os05g51180.1	hyaluronan/mRNA binding family domain containing protein, expressed
RT1/D1W	432	Pavir.Da01367.1	30194269	Pavir.Da01367.1.p|PACid:30194269	0.07371	1.05241958376243	0.0853	46	Protein degradation	protein.degradation.ubiquitin.ubiquitin	AT3G02540.1	Rad23 UV excision repair protein family	LOC_Os06g15360.1	RAD23 DNA repair protein, putative, expressed
RT1/D1W	433	Pavir.Ab03090.1	30236037	Pavir.Ab03090.1.p|PACid:30236037	0.04082	1.02869835280121	0.501	39	Redox balance	redox.thioredoxin	AT2G17420.1	NADPH-dependent thioredoxin reductase A	LOC_Os02g48290.1	thioredoxin reductase 2, putative, expressed
RT1/D1W	434	Pavir.Ib02268.1	30239699	Pavir.Ib02268.1.p|PACid:30239699	0.0981	1.07036288775717	0.0002	95	Nucleotide metabolism	nucleotide metabolism.phosphotransfer and pyrophosphatases.nucleoside diphosphate kinase	AT4G09320.1	Nucleoside diphosphate kinase family protein	LOC_Os10g41410.2	nucleoside diphosphate kinase, putative, expressed
RT1/D1W	436	Pavir.J39864.1	30276223	Pavir.J39864.1.p|PACid:30276223	0.90827	1.87679360156824	<.0001	54	Unclassified	not assigned.no ontology.hydroxyproline rich proteins	AT2G39050.1	hydroxyproline-rich glycoprotein family protein	LOC_Os01g01450.1	stress responsive protein, putative, expressed
RT1/D1W	437	Pavir.Ea02901.1	30230286	Pavir.Ea02901.1.p|PACid:30230286	0.49575	1.41005359564384	<.0001	10	Cell organization	cell.organisation	AT2G41740.1	villin 2	LOC_Os03g24220.1	villin protein, putative, expressed
RT1/D1W	438	Pavir.Gb01278.1	30221426	Pavir.Gb01278.1.p|PACid:30221426	0.80899	1.75198448626109	<.0001	36	Redox balance	redox.glutaredoxins	AT5G40370.1	Glutaredoxin family protein	LOC_Os04g42930.1	OsGrx_C2.2 - glutaredoxin subgroup I, expressed
RT1/D1W	439	Pavir.Ga01443.1	30302646	Pavir.Ga01443.1.p|PACid:30302646	0.31987	1.24821806798542	<.0001	23	Cell division & Cell cycle	cell.division	AT5G40770.1	prohibitin 3	LOC_Os04g38900.2	prohibitin, putative, expressed
RT1/D1W	440	Pavir.Ha00467.1	30317330	Pavir.Ha00467.1.p|PACid:30317330	0.3311	1.25797216480003	<.0001	27			AT3G03960.1	TCP-1/cpn60 chaperonin family protein	LOC_Os03g59020.1	T-complex protein, putative, expressed
RT1/D1W	441	Pavir.J19328.1	30208835	Pavir.J19328.1.p|PACid:30208835	0.26729	1.20354492948047	<.0001	19	Protein degradation	protein.degradation.serine protease	AT5G50920.1	CLPC homologue 1	LOC_Os04g32560.1	ATP-dependent Clp protease ATP-binding subunit clpA homolog CD4B,chloroplast precursor, putative, expressed
RT1/D1W	442	Pavir.J24636.1	30273803	Pavir.J24636.1.p|PACid:30273803	0.04034	1.0283561508373	0.5665	18	Protein synthesis	protein.synthesis.ribosomal protein.eukaryotic.40S subunit.S4	AT5G58420.1	Ribosomal protein S4 (RPS4A) family protein	LOC_Os02g01560.1	40S ribosomal protein S4, putative, expressed
RT1/D1W	443	Pavir.Ib01379.1	30241406	Pavir.Ib01379.1.p|PACid:30241406	0.273	1.20831784338994	0.271	2	Protein synthesis	protein.synthesis.ribosomal protein.eukaryotic.40S subunit.S7	AT3G02560.1	Ribosomal protein S7e family protein	LOC_Os03g18570.1	40S ribosomal protein S7, putative, expressed
RT1/D1W	444	Pavir.Eb02387.1	30312659	Pavir.Eb02387.1.p|PACid:30312659	0.33738	1.26346000824399	<.0001	62	Redox balance	redox.thioredoxin.PDIL	AT2G47470.1	thioredoxin family protein	LOC_Os01g23740.1	OsPDIL2-2 protein disulfide isomerase PDIL2-2, expressed
RT1/D1W	445	Pavir.Ia00247.1	30215087	Pavir.Ia00247.1.p|PACid:30215087	0.15249	1.11148617207176	<.0001	64	TCA cycle	TCA / org transformation.TCA.pyruvate DH.E1	AT1G01090.1	pyruvate dehydrogenase E1 alpha	LOC_Os04g02900.1	dehydrogenase E1 component domain containing protein, expressed
RT1/D1W	446	Pavir.Cb01916.1	30267565	Pavir.Cb01916.1.p|PACid:30267565	0.0172	1.01199348338902	0.6368	55	Secondary metabolism	secondary metabolism.isoprenoids.mevalonate pathway.acetyl-CoA C-acyltransferase	AT5G48230.2	acetoacetyl-CoA thiolase 2	LOC_Os09g07830.1	acetyl-CoA acetyltransferase, cytosolic, putative, expressed
RT1/D1W	447	Pavir.Eb01023.1	30313574	Pavir.Eb01023.1.p|PACid:30313574	-0.14	0.907519155317161	0.2168	6	Protein degradation	protein.degradation.ubiquitin.proteasom	AT5G23540.1	Mov34/MPN/PAD-1 family protein	LOC_Os05g30800.1	26S proteasome non-ATPase regulatory subunit 14, putative, expressed
RT1/D1W	448	Pavir.Cb00491.1	30269084	Pavir.Cb00491.1.p|PACid:30269084	-0.03255	0.977690676446266	0.2248	97	Protein synthesis	protein.synthesis.ribosomal protein.eukaryotic.60S subunit.L8	AT4G36130.1	Ribosomal protein L2 family	LOC_Os12g38000.1	60S ribosomal protein L8, putative, expressed
RT1/D1W	449	Pavir.Eb03096.1	30308970	Pavir.Eb03096.1.p|PACid:30308970	0.66921	1.59020195629271	<.0001	8	Cell organization	cell.organisation	AT2G41740.1	villin 2	LOC_Os03g24220.1	villin protein, putative, expressed
RT1/D1W	450	Pavir.Bb00694.1	30296902	Pavir.Bb00694.1.p|PACid:30296902	0.003233	1.00224345762829	0.9601	15	Protein synthesis	protein.synthesis.ribosomal protein.eukaryotic.40S subunit.S2	AT2G41840.1	Ribosomal protein S5 family protein	LOC_Os03g59310.1	ribosomal protein, putative, expressed
RT1/D1W	452	Pavir.Ia01653.1	30209175	Pavir.Ia01653.1.p|PACid:30209175	-0.22942	0.85297774153383	<.0001	40			AT4G14300.1	RNA-binding (RRM/RBD/RNP motifs) family protein	LOC_Os10g33230.1	RNA recognition motif containing protein, putative, expressed
RT1/D1W	453	Pavir.Eb02924.1	30313830	Pavir.Eb02924.1.p|PACid:30313830	-0.29545	0.814818137758283	<.0001	41			AT5G47210.1	Hyaluronan / mRNA binding family	LOC_Os01g52390.1	plasminogen activator inhibitor 1 RNA-binding protein, putative, expressed
RT1/D1W	454	Pavir.Ha01382.1	30317779	Pavir.Ha01382.1.p|PACid:30317779	-0.25089	0.840377825397814	<.0001	45	Development	development.unspecified	AT1G11430.1	plastid developmental protein DAG, putative	LOC_Os11g11020.1	DAG protein, chloroplast precursor, putative, expressed
RT1/D1W	456	Pavir.J09712.1	30276574	Pavir.J09712.1.p|PACid:30276574	-0.1729	0.887057789181808	0.35	7	Unclassified	not assigned.unknown	AT1G29250.1	Alba DNA/RNA-binding protein	LOC_Os01g07810.1	protein of unknown function domain containing protein, expressed
RT1/D1W	457	Pavir.Ab00778.1	30233092	Pavir.Ab00778.1.p|PACid:30233092	1.06019	2.08520612100106	<.0001	52	Abiotic/biotic stress	stress.abiotic.heat	AT5G12030.1	heat shock protein 17.6A	LOC_Os02g12610.1	hsp20/alpha crystallin family protein, putative, expressed
RT1/D1W	459	Pavir.Ba02960.1	30292908	Pavir.Ba02960.1.p|PACid:30292908	0.06697	1.04751434442489	0.7932	2	Transport	transport.porins	AT3G01280.1	voltage dependent anion channel 1	LOC_Os09g19734.3	isochorismate synthase 1, chloroplast precursor, putative, expressed
RT1/D1W	460	Pavir.J34941.1	30308690	Pavir.J34941.1.p|PACid:30308690	1.1623	2.23813956172341	0.0003	2	Transport	transport.p- and v-ATPases.H+-exporting ATPase	AT4G30190.1	H(+)-ATPase 2	LOC_Os04g56160.1	plasma membrane ATPase, putative, expressed
RT1/D1W	461	Pavir.Ga00544.1	30303723	Pavir.Ga00544.1.p|PACid:30303723	0.26716	1.20343648397582	<.0001	33	Amino acid metabolism / Secondary metabolism	amino acid metabolism.synthesis.branched chain group.leucine specific.3-isopropylmalate dehydrogenase / secondary metabolism.sulfur-containing.glucosinolates.synthesis.aliphatic.methylthioalkylmalate dehydrogenase (MAM-D)	AT1G80560.1	isopropylmalate dehydrogenase 2	LOC_Os03g45320.1	dehydrogenase, putative, expressed
RT1/D1W	462	Pavir.J12472.1	30295593	Pavir.J12472.1.p|PACid:30295593	0.6513	1.57058279690415	0.0002	5	Protein targeting & vesicle tansport	cell.vesicle transport	AT3G11130.1	Clathrin, heavy chain	LOC_Os11g01380.1	clathrin heavy chain, putative, expressed
RT1/D1W	463	Pavir.Gb01988.1	30223710	Pavir.Gb01988.1.p|PACid:30223710	-0.59715	0.661058567365755	<.0001	42	Unclassified	not assigned.unknown	AT2G43180.4	Phosphoenolpyruvate carboxylase family protein	LOC_Os04g31700.1	methylisocitrate lyase 2, putative, expressed
RT1/D1W	465	Pavir.Gb01699.1	30221928	Pavir.Gb01699.1.p|PACid:30221928	0.13333	1.09682244549375	0.0064	63	Unclassified	not assigned.unknown	AT1G43245.1	SET domain-containing protein	LOC_Os04g34610.1	expressed protein
RT1/D1W	466	Pavir.Bb03499.1	30300013	Pavir.Bb03499.1.p|PACid:30300013	0.29156	1.22396304539555	<.0001	16	Mitochondrial electron transport / ATP synthesis	mitochondrial electron transport / ATP synthesis.NADH-DH.complex I.carbonic anhydrase	AT1G47260.1	gamma carbonic anhydrase 2	LOC_Os12g07220.1	bacterial transferase hexapeptide domain containing protein, expressed
RT1/D1W	467	Pavir.J00318.1	30231801	Pavir.J00318.1.p|PACid:30231801	-0.03792	0.974058280305759	0.1538	59	Protein synthesis	protein.synthesis.ribosomal protein.eukaryotic.60S subunit.L24	AT2G36620.1	ribosomal protein L24	LOC_Os05g40820.2	ribosomal protein L24, putative, expressed
RT1/D1W	468	Pavir.Hb00238.1	30266705	Pavir.Hb00238.1.p|PACid:30266705	-0.05644	0.961634126184041	0.788	4			AT3G07810.1	RNA-binding (RRM/RBD/RNP motifs) family protein	LOC_Os11g41890.1	RNA recognition motif containing protein, putative, expressed
RT1/D1W	469	Pavir.Ea00606.1	30226304	Pavir.Ea00606.1.p|PACid:30226304	2.4134	5.32728328475921	<.0001	23	Abiotic/biotic stress	stress.abiotic.heat	AT5G59720.1	heat shock protein 18.2	LOC_Os01g04370.1	hsp20/alpha crystallin family protein, putative, expressed
RT1/D1W	470	Pavir.J03509.1	30218380	Pavir.J03509.1.p|PACid:30218380	0.2887	1.22153906335421	0.2391	2	Protein degradation	protein.degradation.ubiquitin.proteasom	AT5G23540.1	Mov34/MPN/PAD-1 family protein	LOC_Os05g30800.1	26S proteasome non-ATPase regulatory subunit 14, putative, expressed
RT1/D1W	471	Pavir.Ib00085.1	30237402	Pavir.Ib00085.1.p|PACid:30237402	0.17594	1.12970023068134	0.0065	15			AT3G18190.1	TCP-1/cpn60 chaperonin family protein	LOC_Os02g22780.1	T-complex protein, putative, expressed
RT1/D1W	472	Pavir.J18496.1	30199184	Pavir.J18496.1.p|PACid:30199184	0.88501	1.84677742230006	<.0001	37	Protein targeting & vesicle tansport	protein.targeting.mitochondria	AT1G27390.1	translocase outer membrane 20-2	LOC_Os01g69250.1	mitochondrial import receptor subunit TOM20, putative, expressed
RT1/D1W	473	Pavir.Db00043.1	30261398	Pavir.Db00043.1.p|PACid:30261398	-0.07973	0.946234717735904	0.1531	18	Signaling regulation	signalling.calcium	AT1G21630.1	Calcium-binding EF hand family protein	LOC_Os06g51250.1	EF hand family protein, putative, expressed
RT1/D1W	474	Pavir.J01120.1	30257718	Pavir.J01120.1.p|PACid:30257718	0.36274	1.2858657260551	<.0001	60	Phyto-hormone metabolism	hormone metabolism.auxin.induced-regulated-responsive-activated	AT3G22850.1	Aluminium induced protein with YGL and LRDR motifs	LOC_Os03g53270.1	stem-specific protein TSJT1, putative, expressed
RT1/D1W	476	Pavir.J33201.1	30283316	Pavir.J33201.1.p|PACid:30283316	0.1859	1.13752637781964	0.3587	11	Protein synthesis	protein.synthesis.ribosomal protein.eukaryotic.40S subunit.S4	AT5G58420.1	Ribosomal protein S4 (RPS4A) family protein	LOC_Os02g01560.1	40S ribosomal protein S4, putative, expressed
RT1/D1W	477	Pavir.Ba00714.1	30290974	Pavir.Ba00714.1.p|PACid:30290974	-0.10284	0.931198087276358	0.1872	12	Unclassified	not assigned.unknown	AT1G61667.1	Protein of unknown function, DUF538	LOC_Os07g36410.1	expressed protein
RT1/D1W	478	Pavir.Ga01309.1	30304739	Pavir.Ga01309.1.p|PACid:30304739	0.80768	1.75039436643267	<.0001	29	Redox balance	redox.glutaredoxins	AT5G40370.1	Glutaredoxin family protein	LOC_Os04g42930.1	OsGrx_C2.2 - glutaredoxin subgroup I, expressed
RT1/D1W	479	Pavir.J16366.1	30272430	Pavir.J16366.1.p|PACid:30272430	1.04805	2.06773313342371	<.0001	26	Amino acid metabolism	amino acid metabolism.degradation.branched chain group.shared	AT2G33150.1	peroxisomal 3-ketoacyl-CoA thiolase 3	LOC_Os02g57260.1	3-ketoacyl-CoA thiolase, peroxisomal precursor, putative, expressed
RT1/D1W	480	Pavir.Aa01180.1	30250677	Pavir.Aa01180.1.p|PACid:30250677	-0.14413	0.904924917208808	<.0001	61	Unclassified	not assigned.no ontology.aconitase C-terminal domain-containing protein	AT2G43090.1	Aconitase/3-isopropylmalate dehydratase protein	LOC_Os02g43830.1	3-isopropylmalate dehydratase small subunit 2, putative, expressed
RT1/D1W	481	Pavir.Ga01433.1	30303016	Pavir.Ga01433.1.p|PACid:30303016	0.01349	1.00939440848631	0.8496	23	Protein degradation	protein.degradation	AT4G04210.1	plant UBX domain containing protein 4	LOC_Os04g39040.1	UBA and UBX domain-containing protein, putative, expressed
RT1/D1W	482	Pavir.Eb00769.1	30314162	Pavir.Eb00769.1.p|PACid:30314162	1.4575	2.74632049974979	<.0001	13	Abiotic/biotic stress	stress.abiotic.heat	AT5G59720.1	heat shock protein 18.2	LOC_Os01g04370.1	hsp20/alpha crystallin family protein, putative, expressed
RT1/D1W	483	Pavir.Hb00571.1	30265329	Pavir.Hb00571.1.p|PACid:30265329	0.26011	1.19757001128844	<.0001	32	RNA processing	RNA.processing.RNA helicase	AT3G58510.1	DEA(D/H)-box RNA helicase family protein	N	N
RT1/D1W	484	Pavir.Ea02437.1	30230464	Pavir.Ea02437.1.p|PACid:30230464	-0.1388	0.90827432255142	0.0861	18	Protein modification	protein.postranslational modification	AT4G11260.1	phosphatase-related	LOC_Os01g43540.1	suppressor of G2 allele of SKP1, putative, expressed
RT1/D1W	485	Pavir.J07440.1	30216069	Pavir.J07440.1.p|PACid:30216069	0.32664	1.25408922884501	<.0001	9	Glycolysis	glycolysis.cytosolic branch.phosphoglucomutase (PGM)	AT1G23190.1	Phosphoglucomutase/phosphomannomutase family protein	LOC_Os03g50480.1	phosphoglucomutase, putative, expressed
RT1/D1W	486	Pavir.Ea03104.1	30230363	Pavir.Ea03104.1.p|PACid:30230363	0.3023	1.23310871655443	0.0163	9	Abiotic/biotic stress	stress.abiotic.unspecified	AT1G11360.1	Adenine nucleotide alpha hydrolases-like superfamily protein	LOC_Os01g57450.1	universal stress protein domain containing protein, putative, expressed
RT1/D1W	487	Pavir.Ib00428.1	30242435	Pavir.Ib00428.1.p|PACid:30242435	2.9928	7.96017418360891	<.0001	36	Unclassified	not assigned.no ontology.late embryogenesis abundant domain-containing protein	AT4G36600.1	Late embryogenesis abundant (LEA) protein	LOC_Os03g07180.1	embryonic protein DC-8, putative, expressed
RT1/D1W	488	Pavir.J25411.1	30254062	Pavir.J25411.1.p|PACid:30254062	0.23771	1.17911955045415	<.0001	52	Protein synthesis	protein.synthesis.initiation	AT3G60240.3	eukaryotic translation initiation factor 4G	LOC_Os07g36940.1	eukaryotic translation initiation factor 4G, putative, expressed
RT1/D1W	489	Pavir.Ia03140.1	30209041	Pavir.Ia03140.1.p|PACid:30209041	-0.20084	0.870043838307612	<.0001	45	Unclassified	not assigned.unknown	AT1G78150.1	N	LOC_Os03g27010.1	expressed protein
RT1/D1W	490	Pavir.J30656.1	30254357	Pavir.J30656.1.p|PACid:30254357	0.45831	1.37393142608886	<.0001	53	Minor CHO metabolism	minor CHO metabolism.others	AT2G37770.2	NAD(P)-linked oxidoreductase superfamily protein	LOC_Os05g38230.1	oxidoreductase, aldo/keto reductase family protein, putative, expressed
RT1/D1W	491	Pavir.Ab02646.1	30233046	Pavir.Ab02646.1.p|PACid:30233046	0.78427	1.72222065966581	<.0001	48	Protein degradation	protein.degradation.serine protease	AT4G20850.1	tripeptidyl peptidase ii	LOC_Os02g44520.1	OsSub19 - Putative Subtilisin homologue, expressed
RT1/D1W	492	Pavir.J08319.1	30216763	Pavir.J08319.1.p|PACid:30216763	1.6221	3.07822779941921	<.0001	4	Transport	transport.p- and v-ATPases	AT3G01390.1	vacuolar membrane ATPase 10	LOC_Os04g51270.1	vacuolar ATPase G subunit, putative, expressed
RT1/D1W	493	Pavir.J14277.1	30247135	Pavir.J14277.1.p|PACid:30247135	-0.04536	0.969047977328448	0.5115	16	Protein synthesis	protein.synthesis.ribosomal protein.eukaryotic.40S subunit.S2	AT3G57490.1	Ribosomal protein S5 family protein	LOC_Os03g59310.1	ribosomal protein, putative, expressed
RT1/D1W	494	Pavir.Ga00342.1	30303465	Pavir.Ga00342.1.p|PACid:30303465	0.25933	1.19692271431038	<.0001	38	Cell wall synthesis / modification	cell wall.degradation.mannan-xylose-arabinose-fucose	AT5G64570.1	beta-D-xylosidase 4	LOC_Os04g54810.1	beta-D-xylosidase, putative, expressed
RT1/D1W	495	Pavir.Aa01138.1	30252926	Pavir.Aa01138.1.p|PACid:30252926	-0.08706	0.941439310366805	0.2933	6	Nucleotide metabolism	nucleotide metabolism.salvage.nucleoside kinases.adenosine kinase	AT5G03300.1	adenosine kinase 2	LOC_Os02g41590.1	kinase, pfkB family, putative, expressed
RT1/D1W	496	Pavir.Cb01826.1	30267697	Pavir.Cb01826.1.p|PACid:30267697	0.49758	1.41184332615795	<.0001	33	Protein degradation	protein.degradation.serine protease	AT5G50920.1	CLPC homologue 1	LOC_Os12g12850.1	ATP-dependent Clp protease ATP-binding subunit clpA homolog,chloroplast precursor, putative, expressed
RT1/D1W	497	Pavir.Eb02119.1	30311591	Pavir.Eb02119.1.p|PACid:30311591	0.33858	1.26451136192003	0.0006	7	Nucleotide metabolism	nucleotide metabolism.synthesis.pyrimidine.carbamoyl phosphate synthetase	AT1G29900.1	carbamoyl phosphate synthetase B	LOC_Os01g38970.1	carbamoyl-phosphate synthase large chain, putative, expressed
RT1/D1W	498	Pavir.J01102.1	30275273	Pavir.J01102.1.p|PACid:30275273	0.60379	1.51970363086074	<.0001	20	Phyto-hormone metabolism	hormone metabolism.abscisic acid.synthesis-degradation.synthesis.short chain alcohol dehydrogenmase (ABA2)	AT1G52340.1	NAD(P)-binding Rossmann-fold superfamily protein	LOC_Os03g59610.1	oxidoreductase, short chain dehydrogenase/reductase family protein, putative, expressed
RT1/D1W	499	Pavir.Bb00689.1	30298226	Pavir.Bb00689.1.p|PACid:30298226	1.9738	3.92801380496848	0.0002	2	Transport	transport.p- and v-ATPases	AT3G01390.1	vacuolar membrane ATPase 10	LOC_Os04g51270.1	vacuolar ATPase G subunit, putative, expressed
RT1/D1W	500	Pavir.Db00032.1	30261708	Pavir.Db00032.1.p|PACid:30261708	0.64331	1.56190856524018	<.0001	6	Redox balance	redox.dismutases and catalases	AT4G35090.1	catalase 2	LOC_Os06g51150.1	catalase isozyme B, putative, expressed
RT1/D1W	501	Pavir.Ib01658.1	30240366	Pavir.Ib01658.1.p|PACid:30240366	0.1679	1.12342203065151	0.5629	2	DNA synthesis	DNA.synthesis/chromatin structure	AT1G77180.1	chromatin protein family	LOC_Os02g52250.1	SKIP/SNW domain containing protein, expressed
RT1/D1W	502	Pavir.Ab03297.1	30235915	Pavir.Ab03297.1.p|PACid:30235915	1.05132	2.07242515475276	<.0001	16	Amino acid metabolism	amino acid metabolism.degradation.branched chain group.shared	AT2G33150.1	peroxisomal 3-ketoacyl-CoA thiolase 3	LOC_Os02g57260.1	3-ketoacyl-CoA thiolase, peroxisomal precursor, putative, expressed
RT1/D1W	503	Pavir.Ab01521.1	30235923	Pavir.Ab01521.1.p|PACid:30235923	0.29726	1.22880841421466	<.0001	27	Protein degradation	protein.degradation.ubiquitin.proteasom	AT5G58290.1	regulatory particle triple-A ATPase 3	LOC_Os02g21970.1	26S protease regulatory subunit 6B, putative, expressed
RT1/D1W	504	Pavir.Fb00233.1	30278454	Pavir.Fb00233.1.p|PACid:30278454	-0.06207	0.957888740043576	0.6591	7	Glycolysis	glycolysis.cytosolic branch.glyceraldehyde 3-phosphate dehydrogenase (GAP-DH)	AT3G04120.1	glyceraldehyde-3-phosphate dehydrogenase C subunit 1	LOC_Os08g03290.4	glyceraldehyde-3-phosphate dehydrogenase, putative, expressed
RT1/D1W	506	Pavir.Fa00078.1	30186071	Pavir.Fa00078.1.p|PACid:30186071	-0.04494	0.969330129403559	0.3351	33	Protein targeting & vesicle tansport	protein.targeting.nucleus	AT1G27970.1	nuclear transport factor 2B	LOC_Os08g42000.1	nuclear transport factor, putative, expressed
RT1/D1W	507	Pavir.Ga00297.1	30304074	Pavir.Ga00297.1.p|PACid:30304074	0.07248	1.05152270369302	0.2044	14	Protein degradation	protein.degradation.cysteine protease	AT1G47128.1	Granulin repeat cysteine protease family protein	LOC_Os04g57440.1	oryzain beta chain precursor, putative, expressed
RT1/D1W	508	Pavir.Bb00237.1	30300651	Pavir.Bb00237.1.p|PACid:30300651	0.09793	1.07023676895489	0.005	50	Unclassified	not assigned.no ontology	AT5G42950.1	GYF domain-containing protein	LOC_Os07g04530.1	GYF domain containing protein, putative, expressed
RT1/D1W	509	Pavir.Fb02404.1	30281157	Pavir.Fb02404.1.p|PACid:30281157	-0.05365	0.963495611162161	0.3123	32	Unclassified	not assigned.no ontology.proline rich family	AT1G21320.1	nucleotide binding;nucleic acid binding	LOC_Os08g43360.2	RNA recognition motif containing protein, putative, expressed
RT1/D1W	510	Pavir.Da00981.1	30191557	Pavir.Da00981.1.p|PACid:30191557	0.9	1.86606598307361	<.0001	41	Unclassified	not assigned.no ontology	AT1G53280.1	Class I glutamine amidotransferase-like superfamily protein	LOC_Os06g34040.1	DJ-1 family protein, putative, expressed
RT1/D1W	511	Pavir.Bb02013.1	30300571	Pavir.Bb02013.1.p|PACid:30300571	0.05618	1.03970914794682	0.6711	4	Unclassified	not assigned.unknown	AT4G27500.1	proton pump interactor 1	LOC_Os09g17730.1	proton pump interactor, putative, expressed
RT1/D1W	512	Pavir.J06917.1	30188973	Pavir.J06917.1.p|PACid:30188973	-0.03314	0.977290924906255	0.835	3	Protein degradation	protein.degradation	AT1G16470.1	proteasome subunit PAB1	LOC_Os02g42320.2	peptidase, T1 family, putative, expressed
RT1/D1W	513	Pavir.J34526.1	30270940	Pavir.J34526.1.p|PACid:30270940	0.21853	1.16354741313442	<.0001	38	Secondary metabolism	secondary metabolism.phenylpropanoids.lignin biosynthesis.CAD	AT4G34230.1	cinnamyl alcohol dehydrogenase 5	LOC_Os02g09490.1	dehydrogenase, putative, expressed
RT1/D1W	514	Pavir.Ia04760.1	30211407	Pavir.Ia04760.1.p|PACid:30211407	0.14717	1.10739506671705	0.0797	7			AT3G18190.1	TCP-1/cpn60 chaperonin family protein	LOC_Os02g22780.1	T-complex protein, putative, expressed
RT1/D1W	515	Pavir.Ha01585.1	30317739	Pavir.Ha01585.1.p|PACid:30317739	0.31742	1.24610012970239	0.0006	15	Redox balance	redox.thioredoxin.PDIL	AT1G21750.1	PDI-like 1-1	LOC_Os11g09280.1	OsPDIL1-1 protein disulfide isomerase PDIL1-1, expressed
RT1/D1W	516	Pavir.J39070.1	30263779	Pavir.J39070.1.p|PACid:30263779	0.53395	1.44788799153604	<.0001	53			AT5G13700.1	polyamine oxidase 1	LOC_Os09g20284.1	amine oxidase, flavin-containing, domain containing protein, expressed
RT1/D1W	517	Pavir.J19251.1	30258484	Pavir.J19251.1.p|PACid:30258484	-0.6308	0.645818198358418	<.0001	5	Metal binding	metal handling.binding, chelation and storage	AT3G17390.1	S-adenosylmethionine synthetase family protein	LOC_Os01g22010.1	S-adenosylmethionine synthetase, putative, expressed
RT1/D1W	518	Pavir.J40228.1	30243222	Pavir.J40228.1.p|PACid:30243222	0.8866	1.84881388510664	<.0001	14	Development	development.storage proteins	AT2G28680.1	RmlC-like cupins superfamily protein	LOC_Os05g02520.1	cupin domain containing protein, expressed
RT1/D1W	519	Pavir.Db00748.1	30261743	Pavir.Db00748.1.p|PACid:30261743	-0.0008612	0.999403239780353	0.9879	26	Regulation of transcription	RNA.regulation of transcription.C3H zinc finger family	AT3G12130.1	KH domain-containing protein / zinc finger (CCCH type) family protein	LOC_Os06g41384.1	zinc finger C-x8-C-x5-C-x3-H type family protein, expressed
RT1/D1W	521	Pavir.Ga02521.1	30303335	Pavir.Ga02521.1.p|PACid:30303335	1.7314	3.3204988525113	0.0002	2	Phyto-hormone metabolism	hormone metabolism.auxin.induced-regulated-responsive-activated	AT1G60710.1	NAD(P)-linked oxidoreductase superfamily protein	LOC_Os04g26910.1	oxidoreductase, aldo/keto reductase family protein, putative, expressed
RT1/D1W	522	Pavir.Gb01344.1	30223613	Pavir.Gb01344.1.p|PACid:30223613	-0.2152	0.861426732331978	0.1723	4	Protein synthesis	protein.synthesis.initiation	AT3G26400.1	eukaryotic translation initiation factor 4B1	LOC_Os04g40400.1	eukaryotic translation initiation factor 4B, putative, expressed
RT1/D1W	523	Pavir.Db00222.1	30262183	Pavir.Db00222.1.p|PACid:30262183	0.25405	1.19255020225495	<.0001	81	Tetrapyrrole synthesis	tetrapyrrole synthesis.ALA dehydratase	AT1G69740.1	Aldolase superfamily protein	LOC_Os06g49110.1	delta-aminolevulinic acid dehydratase, chloroplast precursor, putative, expressed
RT1/D1W	524	Pavir.Ib00851.1	30241776	Pavir.Ib00851.1.p|PACid:30241776	-0.18247	0.881193036800247	0.0128	10	Amino acid metabolism	amino acid metabolism.degradation.branched chain group.shared	AT2G33150.1	peroxisomal 3-ketoacyl-CoA thiolase 3	LOC_Os10g31950.1	3-ketoacyl-CoA thiolase, peroxisomal precursor, putative, expressed
RT1/D1W	525	Pavir.Ba00012.1	30288503	Pavir.Ba00012.1.p|PACid:30288503	0.4154	1.33366839723047	0.0081	5	Mitochondrial electron transport / ATP synthesis	mitochondrial electron transport / ATP synthesis.NADH-DH.complex I.carbonic anhydrase	AT1G47260.1	gamma carbonic anhydrase 2	LOC_Os12g07220.1	bacterial transferase hexapeptide domain containing protein, expressed
RT1/D1W	526	Pavir.J05185.1	30199551	Pavir.J05185.1.p|PACid:30199551	0.47708	1.39192357432322	<.0001	20	Tetrapyrrole synthesis	tetrapyrrole synthesis.GSA	AT3G48730.1	glutamate-1-semialdehyde 2,1-aminomutase 2	LOC_Os08g41990.1	aminotransferase, putative, expressed
RT1/D1W	527	Pavir.Ib03633.1	30239106	Pavir.Ib03633.1.p|PACid:30239106	2.55	5.8563427837825	<.0001	28	Unclassified	not assigned.unknown	AT3G46750.1	N	LOC_Os10g36180.1	expressed protein
RT1/D1W	528	Pavir.Bb03334.1	30298956	Pavir.Bb03334.1.p|PACid:30298956	0.11115	1.08008885307659	0.1167	5	Protein synthesis	protein.synthesis.ribosomal protein.eukaryotic.40S subunit.SA	AT1G72370.1	40s ribosomal protein SA	LOC_Os07g42450.1	ribosomal protein S2, putative, expressed
RT1/D1W	530	Pavir.Fb00712.1	30280379	Pavir.Fb00712.1.p|PACid:30280379	0.003181	1.00220733376351	0.9388	38	Protein targeting & vesicle tansport	protein.targeting.nucleus	AT1G27970.1	nuclear transport factor 2B	LOC_Os08g42000.1	nuclear transport factor, putative, expressed
RT1/D1W	531	Pavir.J03033.1	30307489	Pavir.J03033.1.p|PACid:30307489	0.06116	1.04330429326268	0.1342	52	Lightreaction	PS.lightreaction.ATP synthase.beta subunit	ATCG00480.1	ATP synthase subunit beta	LOC_Os10g21266.1	ATP synthase subunit beta, putative, expressed
RT1/D1W	532	Pavir.Eb03677.1	30313434	Pavir.Eb03677.1.p|PACid:30313434	-0.28918	0.818367070431955	<.0001	22	Glycolysis	glycolysis.cytosolic branch.triosephosphate isomerase (TPI)	AT3G55440.1	triosephosphate isomerase	LOC_Os01g62420.1	triosephosphate isomerase, cytosolic, putative, expressed
RT1/D1W	533	Pavir.J03846.1	30315800	Pavir.J03846.1.p|PACid:30315800	-0.1949	0.873633449474278	0.1169	4	DNA synthesis	DNA.synthesis/chromatin structure	AT1G77180.1	chromatin protein family	LOC_Os02g52250.1	SKIP/SNW domain containing protein, expressed
RT1/D1W	534	Pavir.Ca01745.2	30204063	Pavir.Ca01745.2.p|PACid:30204063	1.27471	2.41950177901142	<.0001	18	Amino acid metabolism	amino acid metabolism.degradation.glutamate family.proline	AT5G62530.1	aldehyde dehydrogenase 12A1	LOC_Os12g40440.1	expressed protein
RT1/D1W	536	Pavir.Ba00189.1	30293113	Pavir.Ba00189.1.p|PACid:30293113	1.17484	2.25767841117943	<.0001	30	Minor CHO metabolism	minor CHO metabolism.others.Xylose isomerase	AT5G57655.2	xylose isomerase family protein	LOC_Os07g47290.1	xylose isomerase, putative, expressed
RT1/D1W	537	Pavir.Fa00221.1	30187706	Pavir.Fa00221.1.p|PACid:30187706	-0.08258	0.94436730506033	0.2846	18	Unclassified	not assigned.no ontology.proline rich family	AT1G21320.1	nucleotide binding;nucleic acid binding	LOC_Os08g43360.1	RNA recognition motif containing protein, putative, expressed
RT1/D1W	538	Pavir.J40715.1	30284006	Pavir.J40715.1.p|PACid:30284006	-0.1526	0.899627707336197	0.2145	15			AT4G16830.2	Hyaluronan / mRNA binding family	LOC_Os01g52390.1	plasminogen activator inhibitor 1 RNA-binding protein, putative, expressed
RT1/D1W	539	Pavir.Eb03718.1	30311151	Pavir.Eb03718.1.p|PACid:30311151	-0.04801	0.967269624988562	0.2241	32	Unclassified	not assigned.no ontology	AT1G27430.1	GYF domain-containing protein	LOC_Os01g69990.1	GYF domain containing protein, putative, expressed
RT1/D1W	540	Pavir.J00918.1	30276797	Pavir.J00918.1.p|PACid:30276797	0.22313	1.16726327816225	<.0001	28	Redox balance	redox.peroxiredoxin.BAS1	AT5G06290.1	2-cysteine peroxiredoxin B	LOC_Os02g33450.1	peroxiredoxin, putative, expressed
RT1/D1W	541	Pavir.Ia00090.1	30211469	Pavir.Ia00090.1.p|PACid:30211469	-0.36228	0.777934179495756	<.0001	25	Protein degradation	protein.degradation.ubiquitin.ubiquitin protease	AT4G17890.1	ARF-GAP domain 8	LOC_Os03g63710.1	GTPase-activating protein, putative, expressed
RT1/D1W	542	Pavir.Gb01258.1	30221691	Pavir.Gb01258.1.p|PACid:30221691	0.27602	1.21084986977767	<.0001	11	Protein synthesis	protein.synthesis.initiation	AT5G57870.1	MIF4G domain-containing protein / MA3 domain-containing protein	LOC_Os04g42140.1	eukaryotic initiation factor iso-4F subunit p82-34, putative, expressed
RT1/D1W	543	Pavir.Ia00909.1	30209733	Pavir.Ia00909.1.p|PACid:30209733	0.008592	1.0059732899458	0.8842	27			AT4G34490.1	cyclase associated protein 1	LOC_Os03g51250.1	adenylyl cyclase-associated protein, putative, expressed
RT1/D1W	544	Pavir.Cb00609.1	30269631	Pavir.Cb00609.1.p|PACid:30269631	-0.17342	0.886738118760824	0.0014	23	Protein targeting & vesicle tansport	cell.vesicle transport	AT4G12780.1	Chaperone DnaJ-domain superfamily protein	LOC_Os12g36180.1	auxilin, putative, expressed
RT1/D1W	545	Pavir.J08500.1	30190181	Pavir.J08500.1.p|PACid:30190181	0.1993	1.14814113827133	0.2019	2	Protein synthesis	protein.synthesis.ribosomal protein.eukaryotic.60S subunit.L22	AT3G05560.1	Ribosomal L22e protein family	LOC_Os03g22340.1	60S ribosomal protein L22-2, putative, expressed
RT1/D1W	546	Pavir.Bb03203.1	30298195	Pavir.Bb03203.1.p|PACid:30298195	-0.10416	0.930346473255779	0.0816	10	TCA cycle	TCA / org transformation.TCA.succinyl-CoA ligase	AT5G23250.1	Succinyl-CoA ligase, alpha subunit	LOC_Os07g38970.1	succinyl-CoA ligase subunit alpha-2, mitochondrial precursor, putative, expressed
RT1/D1W	547	Pavir.Ca02622.1	30204196	Pavir.Ca02622.1.p|PACid:30204196	-0.16629	0.891131349189356	0.0011	24	Unclassified	not assigned.no ontology	AT1G21660.1	Chaperone DnaJ-domain superfamily protein	LOC_Os12g36180.1	auxilin, putative, expressed
RT1/D1W	548	Pavir.Gb01855.1	30223630	Pavir.Gb01855.1.p|PACid:30223630	-0.02292	0.984238598297363	0.7665	7	Protein synthesis	protein.synthesis.ribosomal protein.eukaryotic.60S subunit.L12	AT3G53430.1	Ribosomal protein L11 family protein	LOC_Os04g50990.1	L11 domain containing ribosomal protein, putative, expressed
RT1/D1W	549	Pavir.Aa00282.1	30253178	Pavir.Aa00282.1.p|PACid:30253178	2.4821	5.58710138480544	<.0001	5	Abiotic/biotic stress	stress.abiotic.heat	AT1G54050.1	HSP20-like chaperones superfamily protein	LOC_Os02g54140.1	hsp20/alpha crystallin family protein, putative, expressed
RT1/D1W	550	Pavir.J16382.1	30208607	Pavir.J16382.1.p|PACid:30208607	0.04047	1.02844881929403	0.77	6	DNA synthesis	DNA.synthesis/chromatin structure	AT1G77180.1	chromatin protein family	LOC_Os02g52250.1	SKIP/SNW domain containing protein, expressed
RT1/D1W	552	Pavir.Bb03322.1	30300232	Pavir.Bb03322.1.p|PACid:30300232	-0.6429	0.640424319957626	<.0001	4	Protein synthesis	protein.synthesis.elongation	AT1G30230.1	Glutathione S-transferase, C-terminal-like;Translation elongation factor EF1B/ribosomal protein S6	LOC_Os07g42300.1	elongation factor protein, putative, expressed
RT1/D1W	553	Pavir.Ia03891.1	30211114	Pavir.Ia03891.1.p|PACid:30211114	-0.12275	0.918435301222081	0.2198	5	Amino acid metabolism	amino acid metabolism.synthesis.aromatic aa.chorismate.chorismate synthase	AT1G48850.1	chorismate synthase, putative / 5-enolpyruvylshikimate-3-phosphate phospholyase, putative	LOC_Os03g14990.1	chorismate synthase 2, chloroplast precursor, putative, expressed
RT1/D1W	554	Pavir.Ga01902.1	30303349	Pavir.Ga01902.1.p|PACid:30303349	0.1821	1.13453412212337	<.0001	84	TCA cycle	TCA / org transformation.TCA.2-oxoglutarate dehydrogenase	AT5G55070.1	Dihydrolipoamide succinyltransferase	LOC_Os04g32330.1	dihydrolipoyllysine-residue succinyltransferase component of 2-oxoglutarate dehydrogenase complex, mitochondrial precursor, putative, expressed
RT1/D1W	555	Pavir.Ab02328.1	30236179	Pavir.Ab02328.1.p|PACid:30236179	0.31647	1.2452798555511	<.0001	18	TCA cycle	TCA / org transformation.TCA.succinyl-CoA ligase	AT2G20420.1	ATP citrate lyase (ACL) family protein	LOC_Os02g40830.1	succinyl-CoA ligase beta-chain, mitochondrial precursor, putative, expressed
RT1/D1W	556	Pavir.J00648.1	30281996	Pavir.J00648.1.p|PACid:30281996	0.12513	1.0906060017995	0.1993	8	Major CHO metabolism	major CHO metabolism.degradation.sucrose.fructokinase	AT2G31390.1	pfkB-like carbohydrate kinase family protein	LOC_Os01g66940.1	kinase, pfkB family, putative, expressed
RT1/D1W	557	Pavir.Aa01285.1	30250946	Pavir.Aa01285.1.p|PACid:30250946	0.2671	1.20338643550021	<.0001	25	TCA cycle	TCA / org transformation.TCA.succinyl-CoA ligase	AT2G20420.1	ATP citrate lyase (ACL) family protein	LOC_Os02g40830.1	succinyl-CoA ligase beta-chain, mitochondrial precursor, putative, expressed
RT1/D1W	558	Pavir.Ea03230.1	30227180	Pavir.Ea03230.1.p|PACid:30227180	-0.32058	0.800747891907456	<.0001	45	Protein synthesis	protein.synthesis.ribosomal protein.eukaryotic.60S subunit.L24	AT2G36620.1	ribosomal protein L24	LOC_Os01g59990.1	ribosomal protein L24, putative, expressed
RT1/D1W	559	Pavir.J01047.1	30217915	Pavir.J01047.1.p|PACid:30217915	0.13151	1.09543964581538	<.0001	28	TCA cycle	TCA / org transformation.TCA.pyruvate DH.E1	AT5G50850.1	Transketolase family protein	LOC_Os09g33500.1	transketolase, putative, expressed
RT1/D1W	561	Pavir.J29514.1	30196199	Pavir.J29514.1.p|PACid:30196199	1.6613	3.16301412833247	<.0001	43	Abiotic/biotic stress	stress.abiotic.heat	AT5G12030.1	heat shock protein 17.6A	LOC_Os02g12610.1	hsp20/alpha crystallin family protein, putative, expressed
RT1/D1W	562	Pavir.J23716.1	30198920	Pavir.J23716.1.p|PACid:30198920	-0.3899	0.763182502426936	0.0316	5	Protein synthesis	protein.synthesis.initiation	AT3G26400.1	eukaryotic translation initiation factor 4B1	LOC_Os04g40400.1	eukaryotic translation initiation factor 4B, putative, expressed
RT1/D1W	563	Pavir.Ib01607.1	30241224	Pavir.Ib01607.1.p|PACid:30241224	0.2641	1.20088666372094	0.5157	2	Protein synthesis	protein.synthesis.ribosomal protein.eukaryotic.60S subunit.L22	AT3G05560.1	Ribosomal L22e protein family	LOC_Os03g22340.1	60S ribosomal protein L22-2, putative, expressed
RT1/D1W	564	Pavir.Bb03339.1	30297266	Pavir.Bb03339.1.p|PACid:30297266	-0.2822	0.822336060825815	0.1381	2	Amino acid metabolism	amino acid metabolism.synthesis.aspartate family.lysine.LL-diaminopimelic acid aminotransferase	AT4G33680.1	Pyridoxal phosphate (PLP)-dependent transferases superfamily protein	LOC_Os03g18810.1	aminotransferase, classes I and II, domain containing protein, expressed
RT1/D1W	565	Pavir.J18993.1	30308525	Pavir.J18993.1.p|PACid:30308525	0.07196	1.05114376479021	0.4419	20	Protein synthesis	protein.synthesis.ribosomal protein.eukaryotic.60S subunit.L13	AT3G49010.1	breast basic conserved 1	LOC_Os06g02510.1	ribosomal protein L13, putative, expressed
RT1/D1W	566	Pavir.J15560.1	30197377	Pavir.J15560.1.p|PACid:30197377	0.37365	1.29562660632765	<.0001	15	Phyto-hormone metabolism	hormone metabolism.abscisic acid.synthesis-degradation.synthesis.short chain alcohol dehydrogenmase (ABA2)	AT1G52340.1	NAD(P)-binding Rossmann-fold superfamily protein	LOC_Os03g59610.1	oxidoreductase, short chain dehydrogenase/reductase family protein, putative, expressed
RT1/D1W	567	Pavir.J38101.1	30254430	Pavir.J38101.1.p|PACid:30254430	0.06037	1.04273315054273	0.2639	13	Phyto-hormone metabolism	hormone metabolism.jasmonate.synthesis-degradation.12-Oxo-PDA-reductase	AT2G06050.1	oxophytodienoate-reductase 3	LOC_Os08g35740.1	12-oxophytodienoate reductase, putative, expressed
RT1/D1W	569	Pavir.Fa02177.1	30188715	Pavir.Fa02177.1.p|PACid:30188715	-0.3448	0.787417128195681	0.1357	2	RNA synthesis	RNA.transcription	AT4G10070.1	KH domain-containing protein	LOC_Os08g01930.1	KH domain-containing protein, putative, expressed
RT1/D1W	571	Pavir.Ba00550.1	30288652	Pavir.Ba00550.1.p|PACid:30288652	0.0845	1.06032019870349	0.3504	8	TCA cycle	TCA / org transformation.TCA.succinyl-CoA ligase	AT5G23250.1	Succinyl-CoA ligase, alpha subunit	LOC_Os07g38970.1	succinyl-CoA ligase subunit alpha-2, mitochondrial precursor, putative, expressed
RT1/D1W	573	Pavir.Gb00301.1	30221397	Pavir.Gb00301.1.p|PACid:30221397	-0.08939	0.939920082010436	0.0046	77	Redox balance	redox.ascorbate and glutathione	AT3G19010.1	2-oxoglutarate (2OG) and Fe(II)-dependent oxygenase superfamily protein	LOC_Os04g55070.1	gibberellin 20 oxidase 2, putative, expressed
RT1/D1W	574	Pavir.J01695.1	30294459	Pavir.J01695.1.p|PACid:30294459	0.07077	1.05027709144405	0.184	15	Major CHO metabolism	major CHO metabolism.degradation.sucrose.fructokinase	AT1G06030.1	pfkB-like carbohydrate kinase family protein	LOC_Os01g66940.1	kinase, pfkB family, putative, expressed
RT1/D1W	575	Pavir.Fa00378.1	30186590	Pavir.Fa00378.1.p|PACid:30186590	-0.1223	0.918721820782615	0.5701	3	Protein synthesis	protein.synthesis.ribosomal protein.eukaryotic.60S subunit.L17	AT1G67430.1	Ribosomal protein L22p/L17e family protein	LOC_Os09g08430.1	ribosomal protein L22, putative, expressed
RT1/D1W	576	Pavir.Ha00023.1	30316909	Pavir.Ha00023.1.p|PACid:30316909	-0.8346	0.560738487184136	<.0001	14	Protein synthesis	protein.synthesis.ribosomal protein.eukaryotic.60S subunit.L19	AT1G02780.1	Ribosomal protein L19e family protein	LOC_Os03g21940.1	60S ribosomal protein L19-3, putative, expressed
RT1/D1W	577	Pavir.Ia01556.1	30211112	Pavir.Ia01556.1.p|PACid:30211112	-0.04279	0.970775766487612	0.6321	18	Redox balance	redox.ascorbate and glutathione	AT3G48890.1	membrane-associated progesterone binding protein 3	LOC_Os10g35870.1	cytochrome b5-like Heme/Steroid binding domain containing protein, expressed
RT1/D1W	578	Pavir.Fb00133.1	30281131	Pavir.Fb00133.1.p|PACid:30281131	0.47272	1.38772336184787	<.0001	7	TCA cycle	TCA / org transformation.TCA.succinate dehydrogenase	AT5G66760.1	succinate dehydrogenase 1-1	LOC_Os07g04240.1	succinate dehydrogenase flavoprotein subunit,mitochondrial precursor, putative, expressed
RT1/D1W	579	Pavir.Hb00469.1	30266759	Pavir.Hb00469.1.p|PACid:30266759	0.09871	1.07081555404943	0.3811	7			AT3G03960.1	TCP-1/cpn60 chaperonin family protein	LOC_Os03g59020.1	T-complex protein, putative, expressed
RT1/D1W	580	Pavir.Bb02908.1	30299893	Pavir.Bb02908.1.p|PACid:30299893	-0.2635	0.833064438988843	0.1366	4	Unclassified	not assigned.unknown	AT1G61667.1	Protein of unknown function, DUF538	LOC_Os07g36410.1	expressed protein
RT1/D1W	582	Pavir.Aa03552.1	30253822	Pavir.Aa03552.1.p|PACid:30253822	0.1732	1.12755671386259	<.0001	41	Signaling regulation	signalling.calcium	AT5G62390.1	BCL-2-associated athanogene 7	LOC_Os02g01520.1	IQ calmodulin-binding motif family protein, putative, expressed
RT1/D1W	583	Pavir.Bb00096.1	30299026	Pavir.Bb00096.1.p|PACid:30299026	-0.02845	0.980473130803822	0.5323	50	Lipids metabolism	lipid metabolism.'exotics'(steroids, squalene etc)	AT4G27270.1	Quinone reductase family protein	LOC_Os05g42190.1	NADPH-dependent FMN reductase domain containing protein, expressed
RT1/D1W	585	Pavir.Ba00599.1	30289041	Pavir.Ba00599.1.p|PACid:30289041	0.03596	1.02523881183885	0.6506	8	Amino acid metabolism	amino acid metabolism.synthesis.aspartate family.lysine.LL-diaminopimelic acid aminotransferase	AT4G33680.1	Pyridoxal phosphate (PLP)-dependent transferases superfamily protein	LOC_Os03g18810.1	aminotransferase, classes I and II, domain containing protein, expressed
RT1/D1W	586	Pavir.J07067.1	30199017	Pavir.J07067.1.p|PACid:30199017	-0.31358	0.804642585858419	<.0001	54	Functional enzyme	misc.peroxidases	AT4G11290.1	Peroxidase superfamily protein	LOC_Os03g25280.1	peroxidase precursor, putative, expressed
RT1/D1W	587	Pavir.Ba00584.1	30290471	Pavir.Ba00584.1.p|PACid:30290471	-0.07186	0.951410597312516	0.5652	6			AT3G07810.2	RNA-binding (RRM/RBD/RNP motifs) family protein	LOC_Os07g39560.1	RNA recognition motif containing protein, putative, expressed
RT1/D1W	588	Pavir.Ca02374.1	30206832	Pavir.Ca02374.1.p|PACid:30206832	-0.10827	0.927699841440949	0.0044	33	Abiotic/biotic stress	stress.abiotic.heat	AT3G07770.1	HEAT SHOCK PROTEIN 89.1	LOC_Os12g32986.1	heat shock protein, putative, expressed
RT1/D1W	589	Pavir.Fb00688.1	30280415	Pavir.Fb00688.1.p|PACid:30280415	0.18898	1.1399574694178	0.0025	7	TCA cycle	TCA / org transformation.TCA.pyruvate DH.E1	AT5G50850.1	Transketolase family protein	LOC_Os08g42410.2	transketolase, putative, expressed
RT1/D1W	590	Pavir.J40782.1	30315692	Pavir.J40782.1.p|PACid:30315692	0.28976	1.22243690189014	<.0001	28	Abiotic/biotic stress	stress.abiotic.cold	AT5G55530.1	Calcium-dependent lipid-binding (CaLB domain) family protein	LOC_Os07g39620.1	C2 domain containing protein, putative, expressed
RT1/D1W	591	Pavir.Aa02862.1	30253817	Pavir.Aa02862.1.p|PACid:30253817	0.65868	1.57863758154462	<.0001	8	Glyoxylate cycle	gluconeogenesis / glyoxylate cycle.citrate synthase	AT2G42790.1	citrate synthase 3	LOC_Os02g13840.1	citrate synthase, putative, expressed
RT1/D1W	592	Pavir.J04421.1	30195691	Pavir.J04421.1.p|PACid:30195691	0.36755	1.29016000583757	<.0001	14	Tetrapyrrole synthesis	tetrapyrrole synthesis.GSA	AT3G48730.1	glutamate-1-semialdehyde 2,1-aminomutase 2	LOC_Os08g41990.1	aminotransferase, putative, expressed
RT1/D1W	593	Pavir.J30437.1	30285728	Pavir.J30437.1.p|PACid:30285728	0.63591	1.55391759612032	<.0001	35	Abiotic/biotic stress	stress.abiotic.heat	AT4G24190.2	Chaperone protein htpG family protein	LOC_Os06g50300.1	heat shock protein, putative, expressed
RT1/D1W	594	Pavir.Gb00171.1	30222267	Pavir.Gb00171.1.p|PACid:30222267	-0.42799	0.743296644337385	<.0001	46	Functional enzyme	misc.peroxidases	AT1G71695.1	Peroxidase superfamily protein	LOC_Os04g59190.1	peroxidase precursor, putative, expressed
RT1/D1W	595	Pavir.Ca00282.1	30205904	Pavir.Ca00282.1.p|PACid:30205904	0.03015	1.02111828797749	0.4199	31	TCA cycle	TCA / org transformation.TCA.pyruvate DH.E2	AT1G34430.1	2-oxoacid dehydrogenases acyltransferase family protein	LOC_Os12g08170.1	2-oxo acid dehydrogenases acyltransferase domain containing protein, expressed
RT1/D1W	596	Pavir.J15301.1	30189591	Pavir.J15301.1.p|PACid:30189591	0.35843	1.28202998047133	<.0001	9	Phyto-hormone metabolism	hormone metabolism.auxin.induced-regulated-responsive-activated	AT1G60730.3	NAD(P)-linked oxidoreductase superfamily protein	LOC_Os04g26910.1	oxidoreductase, aldo/keto reductase family protein, putative, expressed
RT1/D1W	597	Pavir.J24136.1	30306717	Pavir.J24136.1.p|PACid:30306717	1.31624	2.49016268812889	<.0001	41	Redox balance	redox.ascorbate and glutathione.ascorbate	AT1G75270.1	dehydroascorbate reductase 2	LOC_Os05g02530.1	glutathione S-transferase, N-terminal domain containing protein, expressed
RT1/D1W	599	Pavir.J03896.1	30296206	Pavir.J03896.1.p|PACid:30296206	0.3078	1.23781868083689	<.0001	50	Protein targeting & vesicle tansport	protein.targeting.secretory pathway.unspecified	AT4G09160.1	SEC14 cytosolic factor family protein / phosphoglyceride transfer family protein	LOC_Os05g35460.1	patellin protein, putative, expressed
RT1/D1W	600	Pavir.Ca00666.1	30204345	Pavir.Ca00666.1.p|PACid:30204345	1.1608	2.2358137308499	<.0001	50	Redox balance	redox.ascorbate and glutathione.ascorbate	AT1G75270.1	dehydroascorbate reductase 2	LOC_Os05g02530.1	glutathione S-transferase, N-terminal domain containing protein, expressed
RT1/D1W	601	Pavir.J37851.1	30254990	Pavir.J37851.1.p|PACid:30254990	0.19728	1.14653468497582	<.0001	66	Glycolysis	glycolysis.cytosolic branch.enolase	AT1G74030.1	enolase 1	LOC_Os09g20820.1	enolase, putative, expressed
RT1/D1W	602	Pavir.J19551.1	30254888	Pavir.J19551.1.p|PACid:30254888	-0.8668	0.548361808113193	<.0001	4	Protein synthesis	protein.synthesis.ribosomal protein.eukaryotic.60S subunit.L19	AT1G02780.1	Ribosomal protein L19e family protein	LOC_Os03g21940.1	60S ribosomal protein L19-3, putative, expressed
RT1/D1W	603	Pavir.Ib03608.1	30240452	Pavir.Ib03608.1.p|PACid:30240452	0.20853	1.15551020406897	0.0097	7	Redox balance	redox.thioredoxin	AT4G04950.1	thioredoxin family protein	LOC_Os10g35720.1	OsGrx_S17 - glutaredoxin subgroup II, expressed
RT1/D1W	604	Pavir.Eb02928.1	30313963	Pavir.Eb02928.1.p|PACid:30313963	0.37958	1.30096306157821	0.0003	5	Protein synthesis	protein.synthesis.ribosomal protein.eukaryotic.40S subunit.S24	AT3G04920.1	Ribosomal protein S24e family protein	LOC_Os02g13530.1	40S ribosomal protein S24, putative, expressed
RT1/D1W	605	Pavir.Ia03660.1	30209519	Pavir.Ia03660.1.p|PACid:30209519	-0.16675	0.890847259298656	0.0001	58			AT5G02530.1	RNA-binding (RRM/RBD/RNP motifs) family protein	LOC_Os03g17010.1	RNA recognition motif containing protein, putative, expressed
RT1/D1W	606	Pavir.J02415.1	30272368	Pavir.J02415.1.p|PACid:30272368	0.11655	1.08413919548668	0.0307	24	Unclassified	not assigned.unknown	AT4G01290.1	N	LOC_Os06g01680.1	expressed protein
RT1/D1W	607	Pavir.Fa00238.1	30188232	Pavir.Fa00238.1.p|PACid:30188232	-0.04974	0.966110423983108	0.4347	22	Protein synthesis	protein.synthesis.initiation	AT5G42220.1	Ubiquitin-like superfamily protein	LOC_Os07g31540.1	ubiquitin family protein, putative, expressed
RT1/D1W	608	Pavir.J28808.1	30307975	Pavir.J28808.1.p|PACid:30307975	-0.04702	0.967933608391695	0.6386	18	Functional enzyme	misc.short chain dehydrogenase/reductase (SDR)	AT4G03140.1	NAD(P)-binding Rossmann-fold superfamily protein	LOC_Os07g46840.1	oxidoreductase, short chain dehydrogenase/reductase family domain containing protein, expressed
RT1/D1W	609	Pavir.Ia01243.1	30210205	Pavir.Ia01243.1.p|PACid:30210205	-0.07258	0.950935899122606	0.1259	31			AT3G04610.1	RNA-binding KH domain-containing protein	LOC_Os03g42900.1	KH domain containing protein, putative, expressed
RT1/D1W	610	Pavir.J35033.1	30286459	Pavir.J35033.1.p|PACid:30286459	0.32629	1.25378502180245	<.0001	16	Redox balance	redox.ascorbate and glutathione.ascorbate	AT1G63940.2	monodehydroascorbate reductase 6	LOC_Os08g05570.3	monodehydroascorbate reductase, putative, expressed
RT1/D1W	612	Pavir.Bb03230.1	30297984	Pavir.Bb03230.1.p|PACid:30297984	-0.2276	0.854054475748399	0.1542	7			AT3G07810.2	RNA-binding (RRM/RBD/RNP motifs) family protein	LOC_Os07g39560.1	RNA recognition motif containing protein, putative, expressed
RT1/D1W	613	Pavir.J35906.1	30283811	Pavir.J35906.1.p|PACid:30283811	-0.17607	0.885110817692912	0.0043	10	Protein synthesis	protein.synthesis.ribosomal protein.eukaryotic.40S subunit.S8	AT5G20290.1	Ribosomal protein S8e family protein	LOC_Os04g28180.1	ribosomal protein, putative, expressed
RT1/D1W	616	Pavir.Ea03480.1	30229548	Pavir.Ea03480.1.p|PACid:30229548	0.3831	1.30414112830035	<.0001	6	RNA processing	RNA.processing	AT5G63120.2	P-loop containing nucleoside triphosphate hydrolases superfamily protein	N	N
RT1/D1W	617	Pavir.J33724.1	30284534	Pavir.J33724.1.p|PACid:30284534	0.37882	1.30027790531403	<.0001	10	Cell division & Cell cycle	cell.division	AT5G40770.1	prohibitin 3	LOC_Os04g38900.2	prohibitin, putative, expressed
RT1/D1W	619	Pavir.Aa03577.1	30251625	Pavir.Aa03577.1.p|PACid:30251625	-0.24	0.846745312362527	<.0001	19	Fermentation	fermentation.LDH	AT4G17260.1	Lactate/malate dehydrogenase family protein	LOC_Os02g01510.1	lactate/malate dehydrogenase, putative, expressed
RT1/D1W	620	Pavir.Ca00868.1	30203917	Pavir.Ca00868.1.p|PACid:30203917	-0.1349	0.910732958602457	0.2241	4	Development	development.unspecified	AT1G18080.1	Transducin/WD40 repeat-like superfamily protein	LOC_Os01g49290.1	WD repeat-containing protein, putative, expressed
RT1/D1W	621	Pavir.Gb00202.1	30223128	Pavir.Gb00202.1.p|PACid:30223128	0.25369	1.19225265876822	0.0002	14	Amino acid metabolism / Secondary metabolism	amino acid metabolism.synthesis.branched chain group.leucine specific.3-isopropylmalate dehydrogenase / secondary metabolism.sulfur-containing.glucosinolates.synthesis.aliphatic.methylthioalkylmalate dehydrogenase (MAM-D)	AT1G80560.1	isopropylmalate dehydrogenase 2	LOC_Os03g45320.1	dehydrogenase, putative, expressed
RT1/D1W	622	Pavir.Ea02701.1	30230576	Pavir.Ea02701.1.p|PACid:30230576	0.5259	1.43983151354034	<.0001	4	Protein synthesis	protein.synthesis.ribosomal protein.eukaryotic.40S subunit.S24	AT3G04920.1	Ribosomal protein S24e family protein	LOC_Os01g52490.1	40S ribosomal protein S24, putative, expressed
RT1/D1W	623	Pavir.Aa00741.1	30253578	Pavir.Aa00741.1.p|PACid:30253578	-0.30465	0.809638612275975	<.0001	23	Functional enzyme	misc.dynamin	AT1G10290.1	dynamin-like protein 6	LOC_Os02g50550.1	dynamin, putative, expressed
RT1/D1W	624	Pavir.J15811.1	30248493	Pavir.J15811.1.p|PACid:30248493	0.15154	1.11075451066291	0.0554	15			AT4G34490.1	cyclase associated protein 1	LOC_Os03g51250.1	adenylyl cyclase-associated protein, putative, expressed
RT1/D1W	625	Pavir.J28979.1	30258095	Pavir.J28979.1.p|PACid:30258095	0.68808	1.61113792007705	<.0001	18	Abiotic/biotic stress	stress.abiotic.cold	AT5G55530.1	Calcium-dependent lipid-binding (CaLB domain) family protein	LOC_Os07g39620.1	C2 domain containing protein, putative, expressed
RT1/D1W	626	Pavir.J35026.1	30306254	Pavir.J35026.1.p|PACid:30306254	-0.11811	0.921393930743802	0.1237	15			AT5G47210.1	Hyaluronan / mRNA binding family	LOC_Os05g51180.1	hyaluronan/mRNA binding family domain containing protein, expressed
RT1/D1W	627	Pavir.J04506.2	30271067	Pavir.J04506.2.p|PACid:30271067	-1.4518	0.365565036662329	<.0001	3	Protein synthesis	protein.synthesis.ribosomal protein.eukaryotic.60S subunit.L19	AT1G02780.1	Ribosomal protein L19e family protein	LOC_Os03g21940.1	60S ribosomal protein L19-3, putative, expressed
RT1/D1W	628	Pavir.Aa02880.1	30253520	Pavir.Aa02880.1.p|PACid:30253520	0.53437	1.44830956467886	<.0001	56	Protein synthesis	protein.synthesis.ribosomal protein.eukaryotic.40S subunit.S24	AT3G04920.1	Ribosomal protein S24e family protein	LOC_Os02g13530.1	40S ribosomal protein S24, putative, expressed
RT1/D1W	629	Pavir.Aa00616.1	30252567	Pavir.Aa00616.1.p|PACid:30252567	0.07605	1.0541279559487	0.3345	17	Abiotic/biotic stress	stress.abiotic.heat	AT4G16660.1	heat shock protein 70 (Hsp 70) family protein	LOC_Os02g48110.1	DnaK family protein, putative, expressed
RT1/D1W	630	Pavir.Fa00721.1	30186465	Pavir.Fa00721.1.p|PACid:30186465	0.06657	1.04722395203791	0.4244	10	Phyto-hormone metabolism	hormone metabolism.jasmonate.synthesis-degradation.12-Oxo-PDA-reductase	AT2G06050.1	oxophytodienoate-reductase 3	LOC_Os08g35740.1	12-oxophytodienoate reductase, putative, expressed
RT1/D1W	631	Pavir.Ib01667.1	30241775	Pavir.Ib01667.1.p|PACid:30241775	-0.2846	0.820969198252482	0.0665	8	Protein synthesis	protein.synthesis.ribosome biogenesis.Pre-rRNA processing and modifications.snoRNPs	AT3G05060.1	NOP56-like pre RNA processing ribonucleoprotein	LOC_Os03g22740.1	nucleolar protein NOP5-1, putative, expressed
RT1/D1W	632	Pavir.J05905.1	30225850	Pavir.J05905.1.p|PACid:30225850	0.20528	1.15291008327126	0.0105	5	RNA processing	RNA.processing	AT5G63120.2	P-loop containing nucleoside triphosphate hydrolases superfamily protein	N	N
RT1/D1W	633	Pavir.Ea00799.1	30226957	Pavir.Ea00799.1.p|PACid:30226957	0.46433	1.37967647095901	<.0001	17	Unclassified	not assigned.no ontology.hydroxyproline rich proteins	AT2G39050.1	hydroxyproline-rich glycoprotein family protein	LOC_Os01g01450.1	stress responsive protein, putative, expressed
RT1/D1W	634	Pavir.Ib04479.1	30239718	Pavir.Ib04479.1.p|PACid:30239718	-0.09732	0.934767836614283	0.2032	20	Protein degradation	protein.degradation.ubiquitin.ubiquitin protease	AT4G17890.1	ARF-GAP domain 8	LOC_Os03g63710.1	GTPase-activating protein, putative, expressed
RT1/D1W	635	Pavir.Ab00791.1	30236629	Pavir.Ab00791.1.p|PACid:30236629	0.7358	1.66532066329369	<.0001	6	Protein synthesis	protein.synthesis.elongation	AT1G57720.1	Translation elongation factor EF1B, gamma chain	LOC_Os02g12800.1	elongation factor 1-gamma, putative, expressed
RT1/D1W	636	Pavir.Ia00465.1	30214335	Pavir.Ia00465.1.p|PACid:30214335	-0.008148	0.994368155405211	0.9459	3	TCA cycle	TCA / org transformation.TCA.succinate dehydrogenase	AT5G66760.1	succinate dehydrogenase 1-1	LOC_Os07g04240.1	succinate dehydrogenase flavoprotein subunit,mitochondrial precursor, putative, expressed
RT1/D1W	637	Pavir.Fa02071.1	30186116	Pavir.Fa02071.1.p|PACid:30186116	0.33893	1.26481817150462	<.0001	23	Unclassified	not assigned.unknown	AT1G30580.1	GTP binding	LOC_Os08g09940.1	GTP-binding protein, putative, expressed
RT1/D1W	639	Pavir.Eb02159.1	30313054	Pavir.Eb02159.1.p|PACid:30313054	0.28716	1.22023583125246	0.0007	6	TCA cycle	TCA / org transformation.TCA.IDH	AT1G65930.1	cytosolic NADP+-dependent isocitrate dehydrogenase	LOC_Os01g46610.1	dehydrogenase, putative, expressed
RT1/D1W	640	Pavir.Eb00895.1	30311995	Pavir.Eb00895.1.p|PACid:30311995	0.70468	1.62978312724547	<.0001	25	Secondary metabolism	secondary metabolism.flavonoids.isoflavones.isoflavone reductase	AT1G75280.1	NmrA-like negative transcriptional regulator family protein	LOC_Os01g01660.1	isoflavone reductase, putative, expressed
RT1/D1W	642	Pavir.Bb02310.1	30297179	Pavir.Bb02310.1.p|PACid:30297179	0.2951	1.22697002138746	0.0935	2	Protein synthesis	protein.synthesis.ribosomal protein.eukaryotic.40S subunit.S3A	AT4G34670.1	Ribosomal protein S3Ae	LOC_Os02g18550.1	40S ribosomal protein S3a, putative, expressed
RT1/D1W	643	Pavir.J02805.1	30277168	Pavir.J02805.1.p|PACid:30277168	-0.03444	0.976410693166471	0.6724	13	Regulation of transcription	RNA.regulation of transcription.C3H zinc finger family	AT3G12130.1	KH domain-containing protein / zinc finger (CCCH type) family protein	LOC_Os06g41384.1	zinc finger C-x8-C-x5-C-x3-H type family protein, expressed
RT1/D1W	644	Pavir.Ga02523.1	30303239	Pavir.Ga02523.1.p|PACid:30303239	0.04527	1.03187627660733	0.5159	10	Signaling regulation	signalling.G-proteins	AT1G18070.1	Translation elongation factor EF1A/initiation factor IF2gamma family protein	LOC_Os04g20220.1	elongation factor Tu, putative, expressed
RT1/D1W	645	Pavir.Ga01982.1	30302272	Pavir.Ga01982.1.p|PACid:30302272	-0.44557	0.734294144188272	<.0001	60	Protein synthesis	protein.synthesis.ribosomal protein.eukaryotic.60S subunit.L37A	AT3G10950.1	Zinc-binding ribosomal protein family protein	LOC_Os05g48320.1	60S ribosomal protein L37a, putative, expressed
RT1/D1W	646	Pavir.Ia00007.1	30211640	Pavir.Ia00007.1.p|PACid:30211640	0.7471	1.6784156090859	<.0001	5	Unclassified	not assigned.no ontology	AT1G21680.1	DPP6 N-terminal domain-like protein	LOC_Os03g62370.1	WD40-like Beta Propeller Repeat family protein, expressed
RT1/D1W	648	Pavir.J21349.1	30225604	Pavir.J21349.1.p|PACid:30225604	2.1836	4.54285733701831	<.0001	8	Abiotic/biotic stress	stress.abiotic.heat	AT1G54050.1	HSP20-like chaperones superfamily protein	LOC_Os02g54140.1	hsp20/alpha crystallin family protein, putative, expressed
RT1/D1W	649	Pavir.Ga01477.1	30305934	Pavir.Ga01477.1.p|PACid:30305934	-0.4817	0.716133270845845	<.0001	14	Unclassified	not assigned.unknown	AT4G39860.1	N	LOC_Os04g38310.1	expressed protein
RT1/D1W	650	Pavir.Eb02684.1	30310757	Pavir.Eb02684.1.p|PACid:30310757	0.27744	1.21204225848313	0.0015	5	Protein synthesis	protein.synthesis.initiation	AT4G20980.1	Eukaryotic translation initiation factor 3 subunit 7 (eIF-3)	LOC_Os05g49150.1	eukaryotic translation initiation factor 3 subunit D, putative, expressed
RT1/D1W	651	Pavir.J06037.1	30198286	Pavir.J06037.1.p|PACid:30198286	0.61426	1.5307726181538	<.0001	17	Phyto-hormone metabolism	hormone metabolism.auxin.induced-regulated-responsive-activated	AT1G60730.1	NAD(P)-linked oxidoreductase superfamily protein	LOC_Os04g26910.1	oxidoreductase, aldo/keto reductase family protein, putative, expressed
RT1/D1W	652	Pavir.J04737.1	30201100	Pavir.J04737.1.p|PACid:30201100	-0.0674	0.954356373682588	0.4061	8	Protein synthesis	protein.synthesis.initiation	AT4G20980.1	Eukaryotic translation initiation factor 3 subunit 7 (eIF-3)	LOC_Os05g49150.1	eukaryotic translation initiation factor 3 subunit D, putative, expressed
RT1/D1W	653	Pavir.Ab00308.1	30236501	Pavir.Ab00308.1.p|PACid:30236501	0.34403	1.26929728004031	0.0003	3	Protein degradation	protein.degradation.ubiquitin.proteasom	AT5G42790.1	proteasome alpha subunit F1	LOC_Os02g04100.1	peptidase, T1 family, putative, expressed
RT1/D1W	654	Pavir.Ea02307.1	30230814	Pavir.Ea02307.1.p|PACid:30230814	1.16247	2.23840330848398	<.0001	35	Phyto-hormone metabolism	hormone metabolism.auxin.induced-regulated-responsive-activated	AT1G60750.1	NAD(P)-linked oxidoreductase superfamily protein	LOC_Os01g43090.1	oxidoreductase, aldo/keto reductase family protein, putative, expressed
RT1/D1W	655	Pavir.Ea01298.1	30226650	Pavir.Ea01298.1.p|PACid:30226650	0.40562	1.32465806155028	<.0001	31	Redox balance	redox.thioredoxin.PDIL	AT2G47470.1	thioredoxin family protein	LOC_Os01g23740.1	OsPDIL2-2 protein disulfide isomerase PDIL2-2, expressed
RT1/D1W	656	Pavir.J10550.1	30285869	Pavir.J10550.1.p|PACid:30285869	-1.4091	0.376546515538308	<.0001	3	Protein synthesis	protein.synthesis.ribosomal protein.eukaryotic.60S subunit.L19	AT3G16780.1	Ribosomal protein L19e family protein	LOC_Os03g21940.1	60S ribosomal protein L19-3, putative, expressed
RT1/D1W	657	Pavir.Ab00851.1	30235813	Pavir.Ab00851.1.p|PACid:30235813	0.44827	1.36440315868142	<.0001	5	Glyoxylate cycle	gluconeogenesis / glyoxylate cycle.citrate synthase	AT2G42790.1	citrate synthase 3	LOC_Os02g13840.1	citrate synthase, putative, expressed
RT1/D1W	658	Pavir.J10467.1	30225644	Pavir.J10467.1.p|PACid:30225644	0.3589	1.28244770718015	0.1126	3	Protein synthesis	protein.synthesis.ribosomal protein.eukaryotic.40S subunit.S18	AT1G34030.1	Ribosomal protein S13/S18 family	LOC_Os03g58050.1	ribosomal protein S13p/S18e, putative, expressed
RT1/D1W	660	Pavir.J36018.1	30287744	Pavir.J36018.1.p|PACid:30287744	-0.19925	0.871003245703117	<.0001	43	Lipids metabolism	lipid metabolism.'exotics'(steroids, squalene etc)	AT4G27270.1	Quinone reductase family protein	LOC_Os05g42190.1	NADPH-dependent FMN reductase domain containing protein, expressed
RT1/D1W	662	Pavir.Ea03384.1	30226667	Pavir.Ea03384.1.p|PACid:30226667	0.92982	1.90503829631339	<.0001	30	Unclassified	not assigned.unknown	N	N	LOC_Os03g60840.1	BBTI13 - Bowman-Birk type bran trypsin inhibitor precursor, expressed
RT1/D1W	664	Pavir.J14304.1	30208804	Pavir.J14304.1.p|PACid:30208804	0.67842	1.60038609616055	<.0001	19	Cell wall synthesis / modification	cell wall.degradation.pectate lyases and polygalacturonases	AT5G06870.1	polygalacturonase inhibiting protein 2	LOC_Os07g38130.1	polygalacturonase inhibitor 1 precursor, putative, expressed
RT1/D1W	665	Pavir.Ib03116.1	30240280	Pavir.Ib03116.1.p|PACid:30240280	-0.17393	0.886424707746552	0.0115	28			AT4G14300.1	RNA-binding (RRM/RBD/RNP motifs) family protein	LOC_Os10g33230.1	RNA recognition motif containing protein, putative, expressed
RT1/D1W	666	Pavir.J20077.2	30315093	Pavir.J20077.2.p|PACid:30315093	0.24714	1.18685196490154	0.0018	27	Signaling regulation	signalling.phosphinositides	AT4G20260.1	plasma-membrane associated cation-binding protein 1	LOC_Os02g18410.1	salt stress root protein RS1, putative, expressed
RT1/D1W	667	Pavir.Fb02364.1	30279702	Pavir.Fb02364.1.p|PACid:30279702	0.25247	1.19124486892765	<.0001	29	Cell organization	cell.organisation	AT4G35450.1	ankyrin repeat-containing protein 2	LOC_Os09g33810.2	ankyrin repeat domain containing protein, putative, expressed
RT1/D1W	668	Pavir.Ab01243.1	30234054	Pavir.Ab01243.1.p|PACid:30234054	-0.00729	0.994959702198935	0.9412	14	Cell wall synthesis / modification	cell wall.precursor synthesis.UDP-glucose 4,6-dehydratase	AT1G78570.1	rhamnose biosynthesis 1	LOC_Os03g17000.2	NAD dependent epimerase/dehydratase family domain containing protein, expressed
RT1/D1W	669	Pavir.Ba02621.1	30291170	Pavir.Ba02621.1.p|PACid:30291170	0.95956	1.94471669541724	<.0001	25	Redox balance	redox.ascorbate and glutathione	AT3G52880.1	monodehydroascorbate reductase 1	LOC_Os09g39380.1	monodehydroascorbate reductase, putative, expressed
RT1/D1W	670	Pavir.Ea02176.1	30228295	Pavir.Ea02176.1.p|PACid:30228295	0.009366	1.0065131353087	0.86	20			AT3G15010.1	RNA-binding (RRM/RBD/RNP motifs) family protein	LOC_Os01g42820.1	RNA recognition motif containing protein, putative, expressed
RT1/D1W	671	Pavir.Ca01139.1	30203403	Pavir.Ca01139.1.p|PACid:30203403	-0.16836	0.88985365770664	<.0001	61	Abiotic/biotic stress	stress.abiotic.heat	AT3G62600.1	DNAJ heat shock family protein	LOC_Os05g06440.1	dnaJ homolog subfamily B member 11 precursor, putative, expressed
RT1/D1W	672	Pavir.J37678.1	30302024	Pavir.J37678.1.p|PACid:30302024	0.02789	1.0195199455233	0.4442	25	Lipids metabolism	lipid metabolism.FA synthesis and FA elongation.ketoacyl ACP synthase	AT5G46290.1	3-ketoacyl-acyl carrier protein synthase I	LOC_Os06g09630.1	3-oxoacyl-synthase, putative, expressed
RT1/D1W	673	Pavir.J04063.1	30271812	Pavir.J04063.1.p|PACid:30271812	-0.6345	0.644164026312391	<.0001	15			AT4G13850.1	glycine-rich RNA-binding protein 2	LOC_Os01g68790.2	RNA recognition motif containing protein, putative, expressed
RT1/D1W	674	Pavir.J29089.1	30283602	Pavir.J29089.1.p|PACid:30283602	0.07709	1.05488812236097	0.466	7	Protein synthesis	protein.synthesis.ribosome biogenesis.Pre-rRNA processing and modifications.snoRNPs	AT3G05060.1	NOP56-like pre RNA processing ribonucleoprotein	LOC_Os03g22740.1	nucleolar protein NOP5-1, putative, expressed
RT1/D1W	675	Pavir.Fa02355.1	30187623	Pavir.Fa02355.1.p|PACid:30187623	0.61411	1.53061346881883	<.0001	30	Protein synthesis	protein.synthesis.ribosomal protein.eukaryotic.40S subunit.S13	AT4G00100.1	ribosomal protein S13A	LOC_Os08g02410.1	40S ribosomal protein S13, putative, expressed
RT1/D1W	676	Pavir.J06165.1	30286075	Pavir.J06165.1.p|PACid:30286075	1.0427	2.06007948121211	<.0001	3	Unclassified	not assigned.no ontology	AT1G21680.1	DPP6 N-terminal domain-like protein	LOC_Os03g62370.1	WD40-like Beta Propeller Repeat family protein, expressed
RT1/D1W	677	Pavir.Fb01931.1	30279029	Pavir.Fb01931.1.p|PACid:30279029	0.55067	1.46476578785808	<.0001	20	Protein degradation	protein.degradation	AT4G38220.1	Peptidase M20/M25/M40 family protein	LOC_Os08g40110.2	peptidase, putative, expressed
RT1/D1W	678	Pavir.Ia04717.1	30210331	Pavir.Ia04717.1.p|PACid:30210331	0.427	1.34443499415263	0.0004	16	protein synthesis / Signaling regulation	protein.synthesis.ribosome biogenesis.Pre-rRNA processing and modifications.snoRNPs / signalling.G-proteins	AT3G18610.1	nucleolin like 2	LOC_Os04g52960.1	nucleolin, putative, expressed
RT1/D1W	679	Pavir.Cb01427.1	30267841	Pavir.Cb01427.1.p|PACid:30267841	0.58935	1.50456871776384	<.0001	36	Cell organization	cell.organisation	AT2G38750.1	annexin 4	LOC_Os05g31750.1	annexin, putative, expressed
RT1/D1W	680	Pavir.Ib02359.1	30241137	Pavir.Ib02359.1.p|PACid:30241137	0.28552	1.21884950240157	<.0001	60	Transport	transport.ABC transporters and multidrug resistance systems	AT3G54540.1	general control non-repressible 4	LOC_Os03g32630.1	ABC transporter, ATP-binding protein, putative, expressed
RT1/D1W	681	Pavir.J13646.1	30219462	Pavir.J13646.1.p|PACid:30219462	0.03168	1.02220177385392	0.644	7	Lipids metabolism	lipid metabolism.FA synthesis and FA elongation.pyruvate DH	AT3G25860.1	2-oxoacid dehydrogenases acyltransferase family protein	LOC_Os08g33440.1	2-oxo acid dehydrogenases acyltransferase domain containing protein, expressed
RT1/D1W	682	Pavir.Ba02794.1	30292790	Pavir.Ba02794.1.p|PACid:30292790	0.45998	1.37552274921326	<.0001	7	Cell division & Cell cycle	cell.cycle.peptidylprolyl isomerase	AT3G56070.1	rotamase cyclophilin 2	LOC_Os09g39780.1	peptidyl-prolyl cis-trans isomerase, putative, expressed
RT1/D1W	683	Pavir.J26284.1	30315373	Pavir.J26284.1.p|PACid:30315373	0.7314	1.66024942625565	0.0008	2	Unclassified	not assigned.unknown	AT2G43180.4	Phosphoenolpyruvate carboxylase family protein	LOC_Os04g31700.1	methylisocitrate lyase 2, putative, expressed
RT1/D1W	684	Pavir.Aa00124.1	30251080	Pavir.Aa00124.1.p|PACid:30251080	0.19068	1.14130153026948	<.0001	103	Protein synthesis	protein.synthesis.ribosomal protein.eukaryotic.60S subunit.L23	AT3G04400.1	Ribosomal protein L14p/L23e family protein	LOC_Os02g56960.1	ribosomal protein, putative, expressed
RT1/D1W	685	Pavir.Gb01116.1	30221452	Pavir.Gb01116.1.p|PACid:30221452	0.0008197	1.00056833418461	0.9938	8			AT3G20050.1	T-complex protein 1 alpha subunit	LOC_Os04g46620.1	T-complex protein, putative, expressed
RT1/D1W	686	Pavir.Gb01947.1	30222005	Pavir.Gb01947.1.p|PACid:30222005	-0.12596	0.916394052161269	0.0016	34	Protein targeting & vesicle tansport	protein.targeting.nucleus	AT5G60980.2	Nuclear transport factor 2 (NTF2) family protein with RNA binding (RRM-RBD-RNP motifs) domain	LOC_Os04g30430.1	nuclear transport factor 2, putative, expressed
RT1/D1W	687	Pavir.Gb02059.1	30221954	Pavir.Gb02059.1.p|PACid:30221954	-0.1063	0.92896748080784	0.3459	4	Signaling regulation	signalling.G-proteins	AT1G18070.1	Translation elongation factor EF1A/initiation factor IF2gamma family protein	LOC_Os04g20220.1	elongation factor Tu, putative, expressed
RT1/D1W	688	Pavir.Ha00312.1	30316232	Pavir.Ha00312.1.p|PACid:30316232	-0.0641	0.956541853365079	0.0857	42	TCA cycle	TCA / org transformation.other organic acid transformatons.atp-citrate lyase	AT1G09430.1	ATP-citrate lyase A-3	LOC_Os11g47330.1	ATP-grasp domain containing protein, expressed
RT1/D1W	690	Pavir.J00726.1	30274184	Pavir.J00726.1.p|PACid:30274184	0.5219	1.43584498198398	<.0001	11	Lipids metabolism	lipid metabolism.FA synthesis and FA elongation.Acetyl CoA Carboxylation.homomeric Enzyme	AT1G36180.1	acetyl-CoA carboxylase 2	LOC_Os05g22940.1	acetyl-CoA carboxylase, putative, expressed
RT1/D1W	691	Pavir.Aa02228.1	30253196	Pavir.Aa02228.1.p|PACid:30253196	0.5725	1.48709828412265	<.0001	16	Signaling regulation	signalling.phosphinositides	AT4G20260.1	plasma-membrane associated cation-binding protein 1	LOC_Os02g18410.1	salt stress root protein RS1, putative, expressed
RT1/D1W	692	Pavir.J14856.1	30285131	Pavir.J14856.1.p|PACid:30285131	0.27849	1.21292470942798	<.0001	42	Abiotic/biotic stress	stress.abiotic.unspecified	AT1G70840.1	MLP-like protein 31	LOC_Os12g36830.1	pathogenesis-related Bet v I family protein, putative, expressed
RT1/D1W	693	Pavir.J27092.1	30208100	Pavir.J27092.1.p|PACid:30208100	1.13765	2.20022337645892	<.0001	22	Metal binding	metal handling	AT4G14030.1	selenium-binding protein 1	LOC_Os01g68770.1	selenium-binding protein, putative, expressed
RT1/D1W	694	Pavir.Gb00333.1	30221385	Pavir.Gb00333.1.p|PACid:30221385	0.26892	1.20490549899431	0.0001	12	Protein degradation	protein.degradation.cysteine protease	AT5G43060.1	Granulin repeat cysteine protease family protein	LOC_Os04g55650.1	oryzain alpha chain precursor, putative, expressed
RT1/D1W	695	Pavir.Eb01281.1	30308897	Pavir.Eb01281.1.p|PACid:30308897	0.58097	1.49585465261593	<.0001	17	Functional enzyme	misc.peroxidases	AT1G71695.1	Peroxidase superfamily protein	LOC_Os04g59200.1	peroxidase precursor, putative, expressed
RT1/D1W	696	Pavir.Eb00703.1	30312387	Pavir.Eb00703.1.p|PACid:30312387	-0.0124	0.991441806590304	0.7021	52	Protein degradation	protein.degradation.AAA type	AT2G27600.1	AAA-type ATPase family protein	LOC_Os01g04814.1	vacuolar protein sorting-associating protein 4B, putative, expressed
RT1/D1W	697	Pavir.Db01621.1	30263223	Pavir.Db01621.1.p|PACid:30263223	-0.06881	0.953424101033486	0.0314	57	Development	development.unspecified	AT1G52730.1	Transducin/WD40 repeat-like superfamily protein	LOC_Os06g39760.1	WD domain, G-beta repeat domain containing protein, expressed
RT1/D1W	698	Pavir.Ca01530.1	30203834	Pavir.Ca01530.1.p|PACid:30203834	0.05524	1.03903193741523	0.5079	15			AT4G16830.1	Hyaluronan / mRNA binding family	LOC_Os05g45660.2	plasminogen activator inhibitor 1 RNA-binding protein, putative, expressed
RT1/D1W	699	Pavir.Aa02864.1	30251979	Pavir.Aa02864.1.p|PACid:30251979	-0.15711	0.896819777964064	0.0315	16	Cell wall synthesis / modification	cell wall.precursor synthesis.UDP-glucose 4,6-dehydratase	AT1G78570.1	rhamnose biosynthesis 1	LOC_Os03g17000.2	NAD dependent epimerase/dehydratase family domain containing protein, expressed
RT1/D1W	700	Pavir.Eb01124.1	30311582	Pavir.Eb01124.1.p|PACid:30311582	1.1291	2.18722251642715	<.0001	38	Protein degradation	protein.degradation.cysteine protease	AT3G12490.2	cystatin B	LOC_Os01g16430.1	cysteine proteinase inhibitor precursor protein, putative, expressed
RT1/D1W	701	Pavir.Eb03533.1	30310876	Pavir.Eb03533.1.p|PACid:30310876	-0.12489	0.917073963934614	0.0072	36	Redox balance	redox.misc	AT5G17770.1	NADH:cytochrome B5 reductase 1	LOC_Os01g59930.1	NADH-cytochrome b5 reductase, putative, expressed
RT1/D1W	702	Pavir.J37770.1	30244987	Pavir.J37770.1.p|PACid:30244987	0.23113	1.17375393946665	<.0001	49			AT1G23820.1	spermidine synthase 1	LOC_Os07g22600.1	spermidine synthase, putative, expressed
RT1/D1W	703	Pavir.J10072.1	30284133	Pavir.J10072.1.p|PACid:30284133	0.11892	1.08592163837096	0.0415	27			AT5G47210.1	Hyaluronan / mRNA binding family	LOC_Os05g45660.2	plasminogen activator inhibitor 1 RNA-binding protein, putative, expressed
RT1/D1W	704	Pavir.J00426.1	30202062	Pavir.J00426.1.p|PACid:30202062	0.20574	1.15327774461402	<.0001	24	Abiotic/biotic stress	stress.abiotic.heat	AT3G44110.1	DNAJ homologue 3	LOC_Os03g57340.1	chaperone protein dnaJ, putative, expressed
RT1/D1W	705	Pavir.J03636.1	30307498	Pavir.J03636.1.p|PACid:30307498	0.4304	1.34760716111521	<.0001	3	Redox balance	redox.dismutases and catalases	AT4G35090.1	catalase 2	LOC_Os06g51150.1	catalase isozyme B, putative, expressed
RT1/D1W	706	Pavir.Ia01423.1	30214763	Pavir.Ia01423.1.p|PACid:30214763	-0.23399	0.850280053735989	0.001	15	Protein targeting & vesicle tansport	cell.vesicle transport	AT4G34660.1	SH3 domain-containing protein	LOC_Os10g36870.1	src homology-3 domain protein 3, putative, expressed
RT1/D1W	707	Pavir.J19257.1	30258021	Pavir.J19257.1.p|PACid:30258021	0.39045	1.3108022005822	<.0001	35	Cell organization	cell.organisation	AT4G35450.1	ankyrin repeat-containing protein 2	LOC_Os09g33810.2	ankyrin repeat domain containing protein, putative, expressed
RT1/D1W	708	Pavir.Ca00331.1	30203340	Pavir.Ca00331.1.p|PACid:30203340	-0.11354	0.924317241896464	0.0558	18	Protein targeting & vesicle tansport	cell.vesicle transport	AT5G05010.1	clathrin adaptor complexes medium subunit family protein	LOC_Os05g24601.1	coatomer subunit delta, putative, expressed
RT1/D1W	709	Pavir.J01342.1	30199481	Pavir.J01342.1.p|PACid:30199481	0.71979	1.64694228667208	<.0001	33	Unclassified	not assigned.unknown	AT2G27730.1	copper ion binding	LOC_Os09g39550.1	expressed protein
RT1/D1W	710	Pavir.Ga00750.1	30304583	Pavir.Ga00750.1.p|PACid:30304583	-0.3036	0.810228085418009	0.0174	9			AT4G17720.1	RNA-binding (RRM/RBD/RNP motifs) family protein	LOC_Os04g50790.1	RNA recognition motif, putative, expressed
RT1/D1W	711	Pavir.Ea02271.1	30227609	Pavir.Ea02271.1.p|PACid:30227609	0.5723	1.48689214281504	0.016	2	TCA cycle	TCA / org transformation.TCA.IDH	AT1G65930.1	cytosolic NADP+-dependent isocitrate dehydrogenase	LOC_Os01g46610.1	dehydrogenase, putative, expressed
RT1/D1W	712	Pavir.J08750.1	30284955	Pavir.J08750.1.p|PACid:30284955	0.42116	1.33900374901188	<.0001	10	Protein targeting & vesicle tansport	protein.targeting.secretory pathway.unspecified	AT4G09160.1	SEC14 cytosolic factor family protein / phosphoglyceride transfer family protein	LOC_Os01g65380.1	patellin protein, putative, expressed
RT1/D1W	713	Pavir.Ia00570.1	30214285	Pavir.Ia00570.1.p|PACid:30214285	-0.14574	0.903915614178452	0.0078	11	Signaling regulation	signalling.calcium	AT3G13460.1	evolutionarily conserved C-terminal region 2	LOC_Os03g53670.2	YT521-B-like family domain containing protein, expressed
RT1/D1W	714	Pavir.Cb00133.1	30268587	Pavir.Cb00133.1.p|PACid:30268587	0.3956	1.31548974325922	0.0448	3	Transport	transport.p- and v-ATPases	AT5G62670.1	H(+)-ATPase 11	LOC_Os12g44150.1	plasma membrane ATPase, putative, expressed
RT1/D1W	715	Pavir.J23798.1	30218099	Pavir.J23798.1.p|PACid:30218099	0.8836	1.84497337914881	<.0001	49	Transport	transport.p- and v-ATPases.H+-transporting two-sector ATPase.subunit D	AT3G58730.1	vacuolar ATP synthase subunit D (VATD) / V-ATPase D subunit / vacuolar proton pump D subunit (VATPD)	LOC_Os04g55040.1	vacuolar ATP synthase subunit D 1, putative, expressed
RT1/D1W	716	Pavir.Gb02017.1	30224605	Pavir.Gb02017.1.p|PACid:30224605	-0.1556	0.89775892779182	0.0044	21	Protein targeting & vesicle tansport	protein.targeting.nucleus	AT5G60980.2	Nuclear transport factor 2 (NTF2) family protein with RNA binding (RRM-RBD-RNP motifs) domain	LOC_Os04g30430.1	nuclear transport factor 2, putative, expressed
RT1/D1W	719	Pavir.Ga01565.1	30302903	Pavir.Ga01565.1.p|PACid:30302903	0.4634	1.37878738101942	<.0001	12	Pentose phosphate pathway	OPP.oxidative PP.G6PD	AT5G40760.1	glucose-6-phosphate dehydrogenase 6	LOC_Os02g38840.1	glucose-6-phosphate 1-dehydrogenase, cytoplasmic isoform, putative, expressed
RT1/D1W	720	Pavir.Ga01591.1	30302818	Pavir.Ga01591.1.p|PACid:30302818	-0.09213	0.938136658010551	0.0646	31	Protein synthesis	protein.synthesis.initiation	AT3G26400.1	eukaryotic translation initiation factor 4B1	LOC_Os04g40400.1	eukaryotic translation initiation factor 4B, putative, expressed
RT1/D1W	721	Pavir.Ea01091.1	30226293	Pavir.Ea01091.1.p|PACid:30226293	0.27253	1.20792426271363	<.0001	56	TCA cycle	TCA / org transformation.other organic acid transformatons.IDH	AT5G03290.1	isocitrate dehydrogenase V	LOC_Os01g16900.1	dehydrogenase, putative, expressed
RT1/D1W	722	Pavir.J15791.1	30307123	Pavir.J15791.1.p|PACid:30307123	-0.05412	0.963181775480313	0.4339	14	Cell division & Cell cycle	cell.division	AT2G36250.1	Tubulin/FtsZ family protein	LOC_Os03g44420.1	tubulin/FtsZ domain containing protein, putative, expressed
RT1/D1W	723	Pavir.J00209.1	30282251	Pavir.J00209.1.p|PACid:30282251	0.21927	1.16414438333352	<.0001	14	Amino acid metabolism	amino acid metabolism.synthesis.aspartate family.misc.homoserine.aspartate semialdehyde dehydrogenase	AT1G14810.1	semialdehyde dehydrogenase family protein	LOC_Os03g55280.1	semialdehyde dehydrogenase, NAD binding domain containing protein, putative, expressed
RT1/D1W	724	Pavir.Ga01969.1	30303763	Pavir.Ga01969.1.p|PACid:30303763	-0.54912	0.683436876925332	<.0001	10	Unclassified	not assigned.unknown	AT2G43180.2	Phosphoenolpyruvate carboxylase family protein	LOC_Os04g31700.1	methylisocitrate lyase 2, putative, expressed
RT1/D1W	725	Pavir.Bb02160.1	30298465	Pavir.Bb02160.1.p|PACid:30298465	0.10361	1.07445867797163	0.0011	68	Cell division & Cell cycle	cell.cycle.peptidylprolyl isomerase	AT1G26550.1	FKBP-like peptidyl-prolyl cis-trans isomerase family protein	LOC_Os09g24540.1	peptidyl-prolyl cis-trans isomerase, putative, expressed
RT1/D1W	726	Pavir.Ab00980.1	30235300	Pavir.Ab00980.1.p|PACid:30235300	0.55089	1.46498917051045	<.0001	15	Lipids metabolism	lipid metabolism.lipid degradation.beta-oxidation.multifunctional	AT4G29010.1	Enoyl-CoA hydratase/isomerase family	LOC_Os02g17390.1	3-hydroxyacyl-CoA dehydrogenase, putative, expressed
RT1/D1W	727	Pavir.J29510.1	30190291	Pavir.J29510.1.p|PACid:30190291	0.3819	1.30305682521648	0.0013	10	Protein synthesis	protein.aa activation.leucine-tRNA ligase	AT1G09620.1	ATP binding;leucine-tRNA ligases;aminoacyl-tRNA ligases;nucleotide binding;ATP binding;aminoacyl-tRNA ligases	LOC_Os09g32650.1	leucyl-tRNA synthetase, cytoplasmic, putative, expressed
RT1/D1W	728	Pavir.Fa02320.1	30187689	Pavir.Fa02320.1.p|PACid:30187689	0.52329	1.43722904877586	<.0001	22	Glycolysis	glycolysis.cytosolic branch.glyceraldehyde 3-phosphate dehydrogenase (GAP-DH)	AT3G04120.1	glyceraldehyde-3-phosphate dehydrogenase C subunit 1	LOC_Os08g03290.1	glyceraldehyde-3-phosphate dehydrogenase, putative, expressed
RT1/D1W	729	Pavir.Fa00866.1	30185526	Pavir.Fa00866.1.p|PACid:30185526	0.26791	1.20406226557565	0.0028	6	Lipids metabolism	lipid metabolism.FA synthesis and FA elongation.pyruvate DH	AT3G25860.1	2-oxoacid dehydrogenases acyltransferase family protein	LOC_Os08g33440.1	2-oxo acid dehydrogenases acyltransferase domain containing protein, expressed
RT1/D1W	730	Pavir.Ga01079.1	30305781	Pavir.Ga01079.1.p|PACid:30305781	0.29913	1.23040221023306	<.0001	13			AT3G20050.1	T-complex protein 1 alpha subunit	LOC_Os04g46620.1	T-complex protein, putative, expressed
RT1/D1W	731	Pavir.Ca00243.1	30203089	Pavir.Ca00243.1.p|PACid:30203089	1.23045	2.34640166509726	<.0001	16	Redox balance	redox.ascorbate and glutathione.ascorbate	AT4G08390.1	stromal ascorbate peroxidase	LOC_Os12g07820.1	OsAPx6 - Stromal Ascorbate Peroxidase encoding gene 5,8, expressed
RT1/D1W	732	Pavir.J32559.1	30247830	Pavir.J32559.1.p|PACid:30247830	-0.71154	0.610667935364959	<.0001	47	Protein targeting & vesicle tansport	protein.targeting.nucleus	AT5G60980.2	Nuclear transport factor 2 (NTF2) family protein with RNA binding (RRM-RBD-RNP motifs) domain	LOC_Os03g30550.1	RNA-binding protein-like, putative, expressed
RT1/D1W	733	Pavir.Ia03706.1	30214341	Pavir.Ia03706.1.p|PACid:30214341	0.01988	1.01387514451893	0.8054	14	Regulation of transcription	RNA.regulation of transcription.putative transcription regulator	AT1G56110.1	homolog of nucleolar protein NOP56	LOC_Os03g22880.1	nucleolar protein 5A, putative, expressed
RT1/D1W	734	Pavir.Gb01557.1	30224404	Pavir.Gb01557.1.p|PACid:30224404	-0.4639	0.725023669509003	0.0666	5	Unclassified	not assigned.unknown	AT4G39860.1	N	LOC_Os04g38310.1	expressed protein
RT1/D1W	736	Pavir.J03223.1	30245572	Pavir.J03223.1.p|PACid:30245572	0.1066	1.07668781355647	0.4986	2	Functional enzyme	misc.dynamin	AT1G14830.1	DYNAMIN-like 1C	LOC_Os03g50520.1	dynamin family protein, putative, expressed
RT1/D1W	737	Pavir.Ea01261.1	30231507	Pavir.Ea01261.1.p|PACid:30231507	1.51555	2.85907804077925	<.0001	34	Functional enzyme	misc.peroxidases	AT1G71695.1	Peroxidase superfamily protein	LOC_Os04g59260.1	peroxidase precursor, putative, expressed
RT1/D1W	738	Pavir.J08324.1	30190464	Pavir.J08324.1.p|PACid:30190464	-0.46875	0.722590403488523	<.0001	17	Cell division & Cell cycle	cell.division	AT3G52750.1	Tubulin/FtsZ family protein	LOC_Os05g37160.1	tubulin/FtsZ domain containing protein, putative, expressed
RT1/D1W	739	Pavir.Aa02663.1	30249779	Pavir.Aa02663.1.p|PACid:30249779	0.30235	1.23315145358651	0.0001	11	Lipids metabolism	lipid metabolism.lipid degradation.beta-oxidation.multifunctional	AT4G29010.1	Enoyl-CoA hydratase/isomerase family	LOC_Os02g17390.1	3-hydroxyacyl-CoA dehydrogenase, putative, expressed
RT1/D1W	740	Pavir.Ba00913.1	30290442	Pavir.Ba00913.1.p|PACid:30290442	0.306	1.23627526092095	0.0097	4	TCA cycle	TCA / org transformation.other organic acid transformatons.malic	AT2G13560.1	NAD-dependent malic enzyme 1	LOC_Os07g31380.1	NAD-dependent malic enzyme, mitochondrial precursor, putative, expressed
RT1/D1W	742	Pavir.Bb02815.1	30299827	Pavir.Bb02815.1.p|PACid:30299827	0.17573	1.12953580245754	0.0768	6	Unclassified	not assigned.no ontology	AT4G18060.1	SH3 domain-containing protein	LOC_Os07g32460.1	src homology-3 domain protein 3, putative, expressed
RT1/D1W	743	Pavir.J03407.1	30243608	Pavir.J03407.1.p|PACid:30243608	0.5812	1.49609314653628	<.0001	16	Transport	transport.H+ transporting pyrophosphatase	AT1G15690.1	Inorganic H pyrophosphatase family protein	LOC_Os06g08080.1	inorganic H+ pyrophosphatase, putative, expressed
RT1/D1W	744	Pavir.Fb02354.1	30278092	Pavir.Fb02354.1.p|PACid:30278092	0.01421	1.00989828861015	0.806	26	Protein synthesis	protein.synthesis.initiation	AT5G42220.1	Ubiquitin-like superfamily protein	LOC_Os07g31540.1	ubiquitin family protein, putative, expressed
RT1/D1W	745	Pavir.Ca02070.1	30204894	Pavir.Ca02070.1.p|PACid:30204894	0.30161	1.23251909674202	<.0001	25	Protein synthesis	protein.aa activation.bifunctional aminoacyl-tRNA synthetase	AT3G62120.1	Class II aaRS and biotin synthetases superfamily protein	LOC_Os12g25710.1	bifunctional aminoacyl-tRNA synthetase, putative, expressed
RT1/D1W	746	Pavir.J22922.1	30197461	Pavir.J22922.1.p|PACid:30197461	0.86313	1.81898040296486	<.0001	11	Redox balance	redox.ascorbate and glutathione	AT3G52880.1	monodehydroascorbate reductase 1	LOC_Os09g39380.1	monodehydroascorbate reductase, putative, expressed
RT1/D1W	749	Pavir.Bb02673.1	30300141	Pavir.Bb02673.1.p|PACid:30300141	0.57443	1.48908901690801	<.0001	13	Protein degradation	protein.degradation.ubiquitin.proteasom	AT5G66140.1	proteasome alpha subunit D2	LOC_Os08g43540.1	peptidase, T1 family, putative, expressed
RT1/D1W	750	Pavir.J13853.1	30246889	Pavir.J13853.1.p|PACid:30246889	0.1066	1.07668781355647	0.0432	20	Abiotic/biotic stress	stress.abiotic.heat	AT3G44110.1	DNAJ homologue 3	LOC_Os03g57340.1	chaperone protein dnaJ, putative, expressed
RT1/D1W	751	Pavir.Da00693.1	30194067	Pavir.Da00693.1.p|PACid:30194067	0.4704	1.38549355524328	0.0011	7	Unclassified	not assigned.unknown	AT1G29250.1	Alba DNA/RNA-binding protein	LOC_Os06g40040.1	protein of unknown function domain containing protein, expressed
RT1/D1W	752	Pavir.J29503.1	30247219	Pavir.J29503.1.p|PACid:30247219	0.59575	1.51125802456494	<.0001	19	Lipids metabolism	lipid metabolism.'exotics'(steroids, squalene etc)	AT4G36750.1	Quinone reductase family protein	LOC_Os01g57570.1	NADPH-dependent FMN reductase domain containing protein, expressed
RT1/D1W	753	Pavir.Hb01197.1	30264065	Pavir.Hb01197.1.p|PACid:30264065	1.00339	2.0047050636255	<.0001	66	Fermentation	fermentation.ADH	AT1G77120.1	alcohol dehydrogenase 1	LOC_Os11g10480.1	dehydrogenase, putative, expressed
RT1/D1W	754	Pavir.J25062.1	30270685	Pavir.J25062.1.p|PACid:30270685	0.70781	1.63332286275888	<.0001	32	Functional enzyme	misc.peroxidases	AT1G71695.1	Peroxidase superfamily protein	LOC_Os04g59160.1	peroxidase precursor, putative, expressed
RT1/D1W	755	Pavir.Ab03105.1	30235951	Pavir.Ab03105.1.p|PACid:30235951	0.02144	1.01497205038814	0.7403	14	Abiotic/biotic stress	stress.abiotic.heat	AT4G16660.1	heat shock protein 70 (Hsp 70) family protein	LOC_Os02g48110.1	DnaK family protein, putative, expressed
RT1/D1W	756	Pavir.Ba02916.1	30289278	Pavir.Ba02916.1.p|PACid:30289278	0.2579	1.19573691173667	0.0007	3	Unclassified	not assigned.unknown	AT4G27500.1	proton pump interactor 1	LOC_Os09g17730.1	proton pump interactor, putative, expressed
RT1/D1W	757	Pavir.Ab00294.1	30233308	Pavir.Ab00294.1.p|PACid:30233308	1.03528	2.04951137911761	<.0001	24	Unclassified	not assigned.unknown	AT2G21870.1	copper ion binding;cobalt ion binding;zinc ion binding	LOC_Os02g03860.1	mitochondrial ATP synthase precursor, putative, expressed
RT1/D1W	758	Pavir.J07818.1	30243543	Pavir.J07818.1.p|PACid:30243543	1.3384	2.52870720622878	<.0001	39	Abiotic/biotic stress	stress.abiotic.heat	AT4G10250.1	HSP20-like chaperones superfamily protein	LOC_Os04g36750.1	hsp20/alpha crystallin family protein, putative, expressed
RT1/D1W	759	Pavir.Ea01172.1	30226588	Pavir.Ea01172.1.p|PACid:30226588	0.23346	1.17565112232546	<.0001	38	Functional enzyme	misc.peroxidases	AT5G66390.1	Peroxidase superfamily protein	LOC_Os01g15830.1	peroxidase precursor, putative, expressed
RT1/D1W	760	Pavir.Ca02916.1	30204791	Pavir.Ca02916.1.p|PACid:30204791	0.4279	1.34527395800494	0.0095	2	Transport	transport.p- and v-ATPases	AT5G62670.1	H(+)-ATPase 11	LOC_Os12g44150.1	plasma membrane ATPase, putative, expressed
RT1/D1W	761	Pavir.Ib00666.1	30242463	Pavir.Ib00666.1.p|PACid:30242463	0.2395	1.18058343148101	0.0457	2	Protein synthesis	protein.synthesis.ribosomal protein.eukaryotic.40S subunit.S3A	AT4G34670.1	Ribosomal protein S3Ae	LOC_Os03g10340.1	40S ribosomal protein S3a, putative, expressed
RT1/D1W	762	Pavir.Ca00351.1	30203757	Pavir.Ca00351.1.p|PACid:30203757	0.28935	1.22208954648631	0.0001	16	Cell wall synthesis / modification	cell wall.precursor synthesis.KDO pathway.KDO-8-Phosphate Synthase	AT1G79500.1	Aldolase-type TIM barrel family protein	LOC_Os12g10784.1	2-dehydro-3-deoxyphosphooctonate aldolase, putative, expressed
RT1/D1W	763	Pavir.Bb01145.1	30297277	Pavir.Bb01145.1.p|PACid:30297277	-0.22338	0.856556311608024	<.0001	43	Protein synthesis	protein.synthesis.initiation	AT1G13950.1	eukaryotic elongation factor 5A-1	LOC_Os07g40580.1	eukaryotic translation initiation factor 5A, putative, expressed
RT1/D1W	764	Pavir.Ab02692.1	30233425	Pavir.Ab02692.1.p|PACid:30233425	0.01299	1.00904463965597	0.9266	7	Cell wall synthesis / modification	cell wall.precursor synthesis.UER	AT1G63000.1	nucleotide-rhamnose synthase/epimerase-reductase	LOC_Os02g45540.1	synthase, putative, expressed
RT1/D1W	765	Pavir.Ba00876.2	30289218	Pavir.Ba00876.2.p|PACid:30289218	0.2742	1.20932331202226	0.0518	7	Protein modification	protein.postranslational modification	AT3G15260.1	Protein phosphatase 2C family protein	LOC_Os07g32380.1	protein phosphatase 2C, putative, expressed
RT1/D1W	766	Pavir.Eb02682.1	30311820	Pavir.Eb02682.1.p|PACid:30311820	0.06709	1.04760147784235	0.2281	27	Protein modification	protein.postranslational modification	AT1G29370.1	Kinase-related protein of unknown function (DUF1296)	LOC_Os01g47430.2	protein of unknown function DUF1296 domain containing protein, expressed
RT1/D1W	767	Pavir.J00145.1	30185151	Pavir.J00145.1.p|PACid:30185151	0.24573	1.18569257658925	<.0001	25	Redox balance	redox.misc	AT5G17770.1	NADH:cytochrome B5 reductase 1	LOC_Os05g40990.1	NADH-cytochrome b5 reductase, putative, expressed
RT1/D1W	768	Pavir.Ib00367.3	30237501	Pavir.Ib00367.3.p|PACid:30237501	0.0739	1.05255819440637	0.0706	26	Signaling regulation	signalling.calcium	AT3G13460.1	evolutionarily conserved C-terminal region 2	LOC_Os03g06240.2	YT521-B-like family domain containing protein, expressed
RT1/D1W	769	Pavir.Db02134.1	30260775	Pavir.Db02134.1.p|PACid:30260775	0.45551	1.37126746930088	<.0001	17	Cell organization	cell.organisation	AT4G30160.1	villin 4	LOC_Os04g51440.1	villin protein, putative, expressed
RT1/D1W	770	Pavir.Ba01214.1	30291516	Pavir.Ba01214.1.p|PACid:30291516	0.81721	1.76199520721041	<.0001	10	Protein degradation	protein.degradation.ubiquitin.proteasom	AT5G66140.1	proteasome alpha subunit D2	LOC_Os09g36710.1	peptidase, T1 family, putative, expressed
RT1/D1W	771	Pavir.J00062.1	30294440	Pavir.J00062.1.p|PACid:30294440	0.06271	1.04442579893086	0.0289	45	Ammonia metabolism	N-metabolism.N-degradation.glutamate dehydrogenase	AT5G18170.1	glutamate dehydrogenase 1	LOC_Os03g58040.1	glutamate dehydrogenase protein, putative, expressed
RT1/D1W	772	Pavir.Bb03111.1	30296628	Pavir.Bb03111.1.p|PACid:30296628	0.47651	1.39137374244435	<.0001	7	Cell wall synthesis / modification	cell wall.degradation.pectate lyases and polygalacturonases	AT5G06870.1	polygalacturonase inhibiting protein 2	LOC_Os07g38130.1	polygalacturonase inhibitor 1 precursor, putative, expressed
RT1/D1W	773	Pavir.J33065.1	30295448	Pavir.J33065.1.p|PACid:30295448	0.06062	1.04291385808523	0.1903	16	Secondary metabolism / TCA cycle	secondary metabolism.sulfur-containing.glucosinolates.synthesis.aliphatic.methylthioalkylmalate isomerase large subunit (MAM-IL) / TCA / org transformation.other organic acid transformatons.aconitase	AT4G13430.1	isopropyl malate isomerase large subunit 1	LOC_Os02g03260.1	3-isopropylmalate dehydratase large subunit 2, putative, expressed
RT1/D1W	775	Pavir.Aa01459.1	30253473	Pavir.Aa01459.1.p|PACid:30253473	-0.0993	0.933485811814025	0.2682	16	Protein synthesis	protein.synthesis.initiation	AT3G26400.1	eukaryotic translation initiation factor 4B1	LOC_Os02g38220.1	eukaryotic translation initiation factor 4B, putative, expressed
RT1/D1W	776	Pavir.Ia00376.1	30210269	Pavir.Ia00376.1.p|PACid:30210269	0.28286	1.21660429288861	<.0001	13	Amino acid metabolism	amino acid metabolism.synthesis.aspartate family.misc.homoserine.aspartate semialdehyde dehydrogenase	AT1G14810.1	semialdehyde dehydrogenase family protein	LOC_Os03g55280.1	semialdehyde dehydrogenase, NAD binding domain containing protein, putative, expressed
RT1/D1W	777	Pavir.J21667.1	30286930	Pavir.J21667.1.p|PACid:30286930	-0.03458	0.976315946279027	0.4026	20	Signaling regulation	signalling.G-proteins	AT2G44100.1	guanosine nucleotide diphosphate dissociation inhibitor 1	LOC_Os05g23860.1	rab GDP dissociation inhibitor alpha, putative, expressed
RT1/D1W	778	Pavir.Ea03681.1	30229467	Pavir.Ea03681.1.p|PACid:30229467	-0.0661	0.955216723509828	0.6899	6	Protein targeting & vesicle tansport	protein.targeting.secretory pathway.unspecified	AT4G09160.1	SEC14 cytosolic factor family protein / phosphoglyceride transfer family protein	LOC_Os01g65380.1	patellin protein, putative, expressed
RT1/D1W	779	Pavir.Db01653.1	30260469	Pavir.Db01653.1.p|PACid:30260469	0.2292	1.17218477172536	<.0001	62	Unclassified	not assigned.unknown	AT1G11440.1	N	LOC_Os06g12580.1	pro-resilin precursor, putative, expressed
RT1/D1W	781	Pavir.J01552.1	30217531	Pavir.J01552.1.p|PACid:30217531	0.01738	1.01211975414339	0.8124	13	Signaling regulation	signalling.calcium	AT3G13460.1	evolutionarily conserved C-terminal region 2	LOC_Os03g53670.2	YT521-B-like family domain containing protein, expressed
RT1/D1W	782	Pavir.J05168.1	30276825	Pavir.J05168.1.p|PACid:30276825	0.4021	1.32142999703159	0.0026	5	Protein degradation	protein.degradation.AAA type	AT4G04910.1	AAA-type ATPase family protein	LOC_Os05g44310.1	vesicle-fusing ATPase, putative, expressed
RT1/D1W	783	Pavir.Ba00869.1	30291042	Pavir.Ba00869.1.p|PACid:30291042	0.1952	1.1448828640638	0.3199	3	Unclassified	not assigned.no ontology	AT4G18060.1	SH3 domain-containing protein	LOC_Os07g32460.1	src homology-3 domain protein 3, putative, expressed
RT1/D1W	784	Pavir.Gb01953.1	30221685	Pavir.Gb01953.1.p|PACid:30221685	0.80058	1.74180123412875	<.0001	37	TCA cycle	TCA / org transformation.TCA.2-oxoglutarate dehydrogenase	AT5G65750.1	2-oxoglutarate dehydrogenase, E1 component	LOC_Os04g32020.1	2-oxoglutarate dehydrogenase E1 component, mitochondrial precursor, putative, expressed
RT1/D1W	785	Pavir.J40453.1	30191271	Pavir.J40453.1.p|PACid:30191271	0.1326	1.09626759653012	0.3522	4	RNA processing	RNA.processing.RNA helicase	AT2G42520.1	P-loop containing nucleoside triphosphate hydrolases superfamily protein	N	N
RT1/D1W	786	Pavir.J17936.1	30295599	Pavir.J17936.1.p|PACid:30295599	0.8228	1.76883564097796	<.0001	8	Redox balance	redox.ascorbate and glutathione.ascorbate	AT4G08390.1	stromal ascorbate peroxidase	LOC_Os12g07820.1	OsAPx6 - Stromal Ascorbate Peroxidase encoding gene 5,8, expressed
RT1/D1W	787	Pavir.Ab02189.1	30232925	Pavir.Ab02189.1.p|PACid:30232925	-0.18531	0.879460081082529	0.0386	14	Protein synthesis	protein.synthesis.initiation	AT3G26400.1	eukaryotic translation initiation factor 4B1	LOC_Os02g38220.1	eukaryotic translation initiation factor 4B, putative, expressed
RT1/D1W	788	Pavir.Ca02020.1	30206257	Pavir.Ca02020.1.p|PACid:30206257	1.17165	2.25269188423767	<.0001	14	Functional enzyme	misc.gluco-, galacto- and mannosidases.beta-galactosidase	AT2G32810.1	beta galactosidase 9	LOC_Os12g24170.1	beta-galactosidase precursor, putative, expressed
RT1/D1W	789	Pavir.J12293.1	30259828	Pavir.J12293.1.p|PACid:30259828	0.02661	1.01861579963358	0.8675	2	Protein synthesis	protein.synthesis.ribosomal protein.eukaryotic.40S subunit.S3A	AT4G34670.1	Ribosomal protein S3Ae	LOC_Os03g10340.1	40S ribosomal protein S3a, putative, expressed
RT1/D1W	790	Pavir.J25208.1	30294633	Pavir.J25208.1.p|PACid:30294633	0.1935	1.14353458563209	0.0224	10	Protein synthesis	protein.synthesis.ribosomal protein.eukaryotic.60S subunit.L18	AT5G27850.1	Ribosomal protein L18e/L15 superfamily protein	LOC_Os03g22180.1	60S ribosomal protein L18-3, putative, expressed
RT1/D1W	791	Pavir.Ea02935.1	30230708	Pavir.Ea02935.1.p|PACid:30230708	0.12132	1.08772963025204	0.021	22	Glycolysis	glycolysis.cytosolic branch.phosphofructokinase (PFK)	AT4G26270.1	phosphofructokinase 3	LOC_Os01g53680.1	6-phosphofructokinase, putative, expressed
RT1/D1W	792	Pavir.Gb01503.1	30222615	Pavir.Gb01503.1.p|PACid:30222615	-0.08474	0.942954458224498	0.6051	4	Protein degradation	protein.degradation	AT4G04210.1	plant UBX domain containing protein 4	LOC_Os04g39040.1	UBA and UBX domain-containing protein, putative, expressed
RT1/D1W	793	Pavir.J34319.1	30247589	Pavir.J34319.1.p|PACid:30247589	0.02388	1.01669010386938	0.7248	12			AT3G13470.1	TCP-1/cpn60 chaperonin family protein	LOC_Os06g02380.1	T-complex protein, putative, expressed
RT1/D1W	794	Pavir.Ab00068.1	30236619	Pavir.Ab00068.1.p|PACid:30236619	-0.2162	0.860829843710934	0.1437	3	Fermentation	fermentation.LDH	AT4G17260.1	Lactate/malate dehydrogenase family protein	LOC_Os02g01510.1	lactate/malate dehydrogenase, putative, expressed
RT1/D1W	795	Pavir.Fb00054.1	30280281	Pavir.Fb00054.1.p|PACid:30280281	0.61821	1.53496951129592	<.0001	21	Protein synthesis	protein.synthesis.ribosomal protein.eukaryotic.40S subunit.S13	AT4G00100.1	ribosomal protein S13A	LOC_Os08g02410.1	40S ribosomal protein S13, putative, expressed
RT1/D1W	796	Pavir.Bb02806.2	30297040	Pavir.Bb02806.2.p|PACid:30297040	0.1802	1.13304094723645	0.2863	5	Protein modification	protein.postranslational modification	AT3G15260.1	Protein phosphatase 2C family protein	LOC_Os07g32380.1	protein phosphatase 2C, putative, expressed
RT1/D1W	797	Pavir.J28431.1	30248115	Pavir.J28431.1.p|PACid:30248115	0.8787	1.83871770194949	<.0001	7	Nucleotide metabolism	nucleotide metabolism.phosphotransfer and pyrophosphatases.misc	AT5G09650.1	pyrophosphorylase 6	LOC_Os02g52940.2	soluble inorganic pyrophosphatase, putative, expressed
RT1/D1W	798	Pavir.Ca00608.1	30204384	Pavir.Ca00608.1.p|PACid:30204384	1.38498	2.61168336830761	<.0001	29	Abiotic/biotic stress	stress.biotic	AT2G38870.1	Serine protease inhibitor, potato inhibitor I-type family protein	LOC_Os12g36210.1	inhibitor I family protein, putative, expressed
RT1/D1W	799	Pavir.Ib00746.1	30241186	Pavir.Ib00746.1.p|PACid:30241186	0.42906	1.34635606148693	<.0001	11	Mitochondrial electron transport / ATP synthesis	mitochondrial electron transport / ATP synthesis.F1-ATPase	AT2G33040.1	gamma subunit of Mt ATP synthase	LOC_Os10g17280.1	ATP synthase gamma chain, putative, expressed
RT1/D1W	800	Pavir.Aa00918.1	30251344	Pavir.Aa00918.1.p|PACid:30251344	0.1646	1.12085526787557	0.3642	6	Cell wall synthesis / modification	cell wall.precursor synthesis.UER	AT1G63000.1	nucleotide-rhamnose synthase/epimerase-reductase	LOC_Os02g45540.1	synthase, putative, expressed
RT1/D1W	801	Pavir.Ca00847.1	30206054	Pavir.Ca00847.1.p|PACid:30206054	-0.1582	0.89614245923412	0.4248	3	Protein targeting & vesicle tansport	protein.targeting.peroxisomes	AT5G62810.1	peroxin 14	LOC_Os05g01090.1	pex14, putative, expressed
RT1/D1W	802	Pavir.Fa00445.1	30187580	Pavir.Fa00445.1.p|PACid:30187580	0.60408	1.52000914126868	<.0001	16	Protein degradation	protein.degradation	AT4G38220.1	Peptidase M20/M25/M40 family protein	LOC_Os08g40110.2	peptidase, putative, expressed
RT1/D1W	803	Pavir.Ia00387.1	30211655	Pavir.Ia00387.1.p|PACid:30211655	-0.15693	0.896931678002708	0.0134	27	Protein synthesis	protein.synthesis.initiation	AT1G13950.1	eukaryotic elongation factor 5A-1	LOC_Os03g55150.4	eukaryotic translation initiation factor 5A, putative, expressed
RT1/D1W	804	Pavir.J35048.1	30197258	Pavir.J35048.1.p|PACid:30197258	0.5615	1.47580284275109	0.0004	2	Protein targeting & vesicle tansport	protein.targeting.nucleus	AT3G06720.1	importin alpha isoform 1	LOC_Os05g06350.1	importin subunit alpha, putative, expressed
RT1/D1W	806	Pavir.Bb02373.1	30298251	Pavir.Bb02373.1.p|PACid:30298251	0.15461	1.1131206705361	<.0001	31	Glycolysis	glycolysis.plastid branch.glucose-6-phosphate isomerase	AT4G24620.1	phosphoglucose isomerase 1	LOC_Os09g29070.1	glucose-6-phosphate isomerase, putative, expressed
RT1/D1W	807	Pavir.Ca01767.1	30203562	Pavir.Ca01767.1.p|PACid:30203562	0.16638	1.12223903479758	0.0387	8			AT3G13860.1	heat shock protein 60-3A	LOC_Os05g46290.1	T-complex protein, putative, expressed
RT1/D1W	809	Pavir.Eb01145.1	30313952	Pavir.Eb01145.1.p|PACid:30313952	0.318	1.2466011942751	0.0026	10	Glycolysis	glycolysis.plastid branch.pyruvate kinase (PK)	AT5G56350.1	Pyruvate kinase family protein	LOC_Os01g16960.1	pyruvate kinase, putative, expressed
RT1/D1W	810	Pavir.Fb02261.1	30279094	Pavir.Fb02261.1.p|PACid:30279094	0.42909	1.34638405846526	<.0001	20	Unclassified	not assigned.no ontology	AT3G23940.1	dehydratase family	LOC_Os08g44530.1	dihydroxy-acid dehydratase, putative, expressed
RT1/D1W	811	Pavir.Ia01291.1	30212270	Pavir.Ia01291.1.p|PACid:30212270	0.26868	1.20470507322185	<.0001	23	Protein degradation	protein.degradation.serine protease	AT1G47710.1	Serine protease inhibitor (SERPIN) family protein	LOC_Os03g41438.1	serpin domain containing protein, putative, expressed
RT1/D1W	812	Pavir.Ba02207.1	30291102	Pavir.Ba02207.1.p|PACid:30291102	0.12373	1.08954818447333	0.0002	45	Glycolysis	glycolysis.cytosolic branch.enolase	AT1G74030.1	enolase 1	LOC_Os09g20820.1	enolase, putative, expressed
RT1/D1W	813	Pavir.J01605.1	30216899	Pavir.J01605.1.p|PACid:30216899	0.6296	1.54713597689467	<.0001	5	Mitochondrial electron transport / ATP synthesis	mitochondrial electron transport / ATP synthesis.NADH-DH.complex I	AT4G28510.1	prohibitin 1	LOC_Os03g62490.1	prohibitin-2, putative, expressed
RT1/D1W	814	Pavir.Db00653.1	30262041	Pavir.Db00653.1.p|PACid:30262041	1.45738	2.74609207673241	<.0001	38			AT5G54770.1	thiazole biosynthetic enzyme, chloroplast (ARA6) (THI1) (THI4)	LOC_Os07g34570.1	FAD dependent oxidoreductase domain containing protein, expressed
RT1/D1W	815	Pavir.Ia04718.1	30213170	Pavir.Ia04718.1.p|PACid:30213170	0.5217	1.43564594540026	<.0001	16	protein synthesis / Signaling regulation	protein.synthesis.ribosome biogenesis.Pre-rRNA processing and modifications.snoRNPs / signalling.G-proteins	AT3G18610.1	nucleolin like 2	LOC_Os04g52960.1	nucleolin, putative, expressed
RT1/D1W	816	Pavir.J15933.1	30196297	Pavir.J15933.1.p|PACid:30196297	0.67952	1.60160679489094	<.0001	12	Phyto-hormone metabolism	hormone metabolism.auxin.induced-regulated-responsive-activated	AT1G60690.1	NAD(P)-linked oxidoreductase superfamily protein	LOC_Os04g27060.1	oxidoreductase, aldo/keto reductase family protein, putative, expressed
RT1/D1W	817	Pavir.Ea00655.1	30226501	Pavir.Ea00655.1.p|PACid:30226501	0.4396	1.35622824899974	<.0001	29	Unclassified	not assigned.unknown	AT1G23170.2	Protein of unknown function DUF2359, transmembrane	LOC_Os01g03760.1	expressed protein
RT1/D1W	818	Pavir.J01067.1	30270719	Pavir.J01067.1.p|PACid:30270719	0.17919	1.13224800704967	0.0007	25	Glyoxylate cycle	gluconeogenesis / glyoxylate cycle.Malate DH	AT5G09660.4	peroxisomal NAD-malate dehydrogenase 2	LOC_Os03g56280.1	lactate/malate dehydrogenase, putative, expressed
RT1/D1W	819	Pavir.Bb01823.1	30296597	Pavir.Bb01823.1.p|PACid:30296597	0.29191	1.22426001670385	<.0001	13	Lipids metabolism	lipid metabolism.FA synthesis and FA elongation.enoyl ACP reductase	AT2G05990.1	NAD(P)-binding Rossmann-fold superfamily protein	LOC_Os09g10600.1	enoyl-acyl-carrier-protein reductase NADH, chloroplast precursor, expressed
RT1/D1W	821	Pavir.Aa00360.1	30249409	Pavir.Aa00360.1.p|PACid:30249409	0.9384	1.91640170216759	<.0001	7	Nucleotide metabolism	nucleotide metabolism.phosphotransfer and pyrophosphatases.misc	AT5G09650.1	pyrophosphorylase 6	LOC_Os02g52940.2	soluble inorganic pyrophosphatase, putative, expressed
RT1/D1W	822	Pavir.Bb03601.1	30301014	Pavir.Bb03601.1.p|PACid:30301014	1.28748	2.44101303647968	<.0001	35	Functional enzyme	misc.peroxidases	AT5G05340.1	Peroxidase superfamily protein	LOC_Os07g48040.1	peroxidase precursor, putative, expressed
RT1/D1W	823	Pavir.Bb03641.1	30300766	Pavir.Bb03641.1.p|PACid:30300766	0.45362	1.36947221904933	<.0001	13	TCA cycle	TCA / org transformation.TCA.2-oxoglutarate dehydrogenase	AT5G65750.1	2-oxoglutarate dehydrogenase, E1 component	LOC_Os07g49520.1	2-oxoglutarate dehydrogenase E1 component, mitochondrial precursor, putative, expressed
RT1/D1W	824	Pavir.Cb00761.1	30268661	Pavir.Cb00761.1.p|PACid:30268661	1.6431	3.12336245791475	<.0001	25	Phyto-hormone metabolism	hormone metabolism.abscisic acid.induced-regulated-responsive-activated	AT5G13200.1	GRAM domain family protein	LOC_Os12g29400.1	GRAM domain containing protein, expressed
RT1/D1W	825	Pavir.J08513.1	30219810	Pavir.J08513.1.p|PACid:30219810	0.412	1.33052904108069	0.0193	3	Unclassified	not assigned.unknown	AT1G47420.1	succinate dehydrogenase 5	LOC_Os04g34100.1	expressed protein
RT1/D1W	826	Pavir.Ia03695.1	30209438	Pavir.Ia03695.1.p|PACid:30209438	-0.1576	0.896515231916046	0.3924	3	Protein synthesis	protein.synthesis.ribosome biogenesis.Pre-rRNA processing and modifications.snoRNPs	AT3G05060.1	NOP56-like pre RNA processing ribonucleoprotein	LOC_Os03g22740.1	nucleolar protein NOP5-1, putative, expressed
RT1/D1W	827	Pavir.Bb02920.1	30299666	Pavir.Bb02920.1.p|PACid:30299666	0.32148	1.24961181565257	<.0001	34	Secondary metabolism	secondary metabolism.isoprenoids.mevalonate pathway.isopentenyl pyrophosphate:dimethyllallyl pyrophosphate isomerase	AT5G16440.1	isopentenyl diphosphate isomerase 1	LOC_Os07g36190.1	hydrolase, NUDIX family, domain containing protein, expressed
RT1/D1W	828	Pavir.Hb01943.1	30265799	Pavir.Hb01943.1.p|PACid:30265799	-0.07966	0.946280630444616	0.5352	2	Metal binding	metal handling	AT5G19140.1	Aluminium induced protein with YGL and LRDR motifs	LOC_Os11g05050.1	stem-specific protein TSJT1, putative, expressed
RT1/D1W	829	Pavir.J00886.1	30216329	Pavir.J00886.1.p|PACid:30216329	-0.20146	0.869670016209861	0.0078	12	Signaling regulation	signalling.G-proteins	AT3G59920.1	RAB GDP dissociation inhibitor 2	LOC_Os05g23860.1	rab GDP dissociation inhibitor alpha, putative, expressed
RT1/D1W	830	Pavir.Ib02569.1	30241209	Pavir.Ib02569.1.p|PACid:30241209	0.54332	1.45732232248659	<.0001	12	Protein synthesis	protein.aa activation.alanine-tRNA ligase	AT1G50200.1	Alanyl-tRNA synthetase	LOC_Os10g10244.1	alanyl-tRNA synthetase, putative, expressed
RT1/D1W	831	Pavir.J00892.1	30275043	Pavir.J00892.1.p|PACid:30275043	3.1013	8.5819173085479	<.0001	24	Cell organization	cell.organisation	AT1G01750.1	actin depolymerizing factor 11	LOC_Os03g60580.1	actin-depolymerizing factor, putative, expressed
RT1/D1W	832	Pavir.J02386.1	30257561	Pavir.J02386.1.p|PACid:30257561	-0.11027	0.926414667402531	0.105	12	Unclassified	not assigned.unknown	AT4G01290.1	N	LOC_Os06g01680.1	expressed protein
RT1/D1W	834	Pavir.Ib02055.1	30241180	Pavir.Ib02055.1.p|PACid:30241180	0.27541	1.21033800672248	<.0001	40	Unclassified	not assigned.unknown	AT1G26355.1	SPIRAL1-like1	LOC_Os03g30430.1	nitrilase-associated protein, putative, expressed
RT1/D1W	835	Pavir.Ga00421.1	30304584	Pavir.Ga00421.1.p|PACid:30304584	-0.20182	0.869453031928243	0.0082	4	Amino acid metabolism / Photorespiration	amino acid metabolism.degradation.serine-glycine-cysteine group.glycine / PS.photorespiration.glycine cleavage.T subunit	AT1G11860.1	Glycine cleavage T-protein family	LOC_Os04g53230.1	aminomethyltransferase, putative, expressed
RT1/D1W	836	Pavir.J16915.1	30274828	Pavir.J16915.1.p|PACid:30274828	-0.35881	0.77980753491389	<.0001	25	Regulation of transcription	RNA.regulation of transcription.unclassified	AT4G32720.2	La protein 1	LOC_Os04g42010.1	RNA binding protein, putative, expressed
RT1/D1W	837	Pavir.Fa01896.1	30186734	Pavir.Fa01896.1.p|PACid:30186734	0.50853	1.42259993230255	<.0001	45	Unclassified	not assigned.no ontology	AT4G27585.1	SPFH/Band 7/PHB domain-containing membrane-associated protein family	LOC_Os08g06200.1	stomatin-like protein 2, putative, expressed
RT1/D1W	838	Pavir.Eb00699.1	30309449	Pavir.Eb00699.1.p|PACid:30309449	-0.01906	0.986875502034057	0.6848	35	Unclassified	not assigned.no ontology	AT2G01190.1	Octicosapeptide/Phox/Bem1p family protein	LOC_Os01g04650.1	PB1 domain containing protein, expressed
RT1/D1W	839	Pavir.Ia04185.2	30213877	Pavir.Ia04185.2.p|PACid:30213877	0.07346	1.05223722914589	0.0932	24	Unclassified	not assigned.unknown	AT1G55500.3	evolutionarily conserved C-terminal region 4	LOC_Os03g06240.1	YT521-B-like family domain containing protein, expressed
RT1/D1W	841	Pavir.Db02446.1	30262180	Pavir.Db02446.1.p|PACid:30262180	-0.16448	0.892250060988294	0.0092	28			AT4G17720.1	RNA-binding (RRM/RBD/RNP motifs) family protein	LOC_Os06g02240.1	RNA recognition motif containing protein, putative, expressed
RT1/D1W	842	Pavir.J02618.1	30245981	Pavir.J02618.1.p|PACid:30245981	0.29262	1.22486266557282	<.0001	21	Protein synthesis	protein.aa activation.phenylalanine-tRNA ligase	AT4G39280.2	phenylalanyl-tRNA synthetase, putative / phenylalanine--tRNA ligase, putative	LOC_Os10g26130.1	phenylalanyl-tRNA synthetase, putative, expressed
RT1/D1W	844	Pavir.Ib01675.1	30240133	Pavir.Ib01675.1.p|PACid:30240133	-0.17913	0.883235460313592	0.0533	8	Protein synthesis	protein.synthesis.ribosome biogenesis.Pre-rRNA processing and modifications.snoRNPs	AT3G12860.1	NOP56-like pre RNA processing ribonucleoprotein	LOC_Os03g22880.1	nucleolar protein 5A, putative, expressed
RT1/D1W	845	Pavir.Ca01667.1	30204127	Pavir.Ca01667.1.p|PACid:30204127	0.1587	1.11628081377684	0.2448	4	Protein degradation	protein.degradation.AAA type	AT4G04910.1	AAA-type ATPase family protein	LOC_Os05g44310.1	vesicle-fusing ATPase, putative, expressed
RT1/D1W	846	Pavir.J18124.1	30254835	Pavir.J18124.1.p|PACid:30254835	0.06244	1.04423035320482	0.6058	3	Lipids metabolism	lipid metabolism.FA synthesis and FA elongation.ketoacyl ACP synthase	AT5G46290.3	3-ketoacyl-acyl carrier protein synthase I	LOC_Os06g09630.1	3-oxoacyl-synthase, putative, expressed
RT1/D1W	847	Pavir.Fa01933.1	30186872	Pavir.Fa01933.1.p|PACid:30186872	0.27766	1.21222709978454	0.0005	26	Pentose phosphate pathway	OPP.non-reductive PP.transaldolase	AT1G12230.1	Aldolase superfamily protein	LOC_Os08g05830.1	transaldolase, putative, expressed
RT1/D1W	849	Pavir.Ab02346.1	30232092	Pavir.Ab02346.1.p|PACid:30232092	0.05394	1.03809609644234	0.5197	7	Secondary metabolism	secondary metabolism.phenylpropanoids.lignin biosynthesis.PAL	AT2G37040.1	PHE ammonia lyase 1	LOC_Os02g41680.1	phenylalanine ammonia-lyase, putative, expressed
RT1/D1W	850	Pavir.Ab02230.1	30233988	Pavir.Ab02230.1.p|PACid:30233988	-0.06834	0.953734757350347	0.0984	31	Secondary metabolism	secondary metabolism.isoprenoids.non-mevalonate pathway.HDS	AT5G60600.1	4-hydroxy-3-methylbut-2-enyl diphosphate synthase	LOC_Os02g39160.1	hydroxymethylbutenyl 4-diphosphate synthase, putative, expressed
RT1/D1W	851	Pavir.Ab03065.1	30235727	Pavir.Ab03065.1.p|PACid:30235727	0.3039	1.2344770365002	0.0435	4	Unclassified	not assigned.no ontology.tetratricopeptide repeat (TPR)	AT3G52140.2	tetratricopeptide repeat (TPR)-containing protein	LOC_Os02g48620.1	tetratricopeptide repeat, putative, expressed
RT1/D1W	852	Pavir.J02588.1	30189301	Pavir.J02588.1.p|PACid:30189301	0.25	1.18920711500272	0.0183	9	Protein synthesis	protein.aa activation.leucine-tRNA ligase	AT1G09620.1	ATP binding;leucine-tRNA ligases;aminoacyl-tRNA ligases;nucleotide binding;ATP binding;aminoacyl-tRNA ligases	LOC_Os09g32650.1	leucyl-tRNA synthetase, cytoplasmic, putative, expressed
RT1/D1W	854	Pavir.Ib01577.1	30242527	Pavir.Ib01577.1.p|PACid:30242527	0.1873	1.13863077607259	0.0001	20	Unclassified	not assigned.no ontology	AT2G40600.1	appr-1-p processing enzyme family protein	LOC_Os03g21830.1	appr-1-p processing enzyme family protein, putative, expressed
RT1/D1W	855	Pavir.J02050.1	30185080	Pavir.J02050.1.p|PACid:30185080	0.13609	1.09892276980836	<.0001	58	Phyto-hormone metabolism / RNA processing	hormone metabolism.ethylene.induced-regulated-responsive-activated / RNA.processing.RNA helicase	AT1G55150.1	DEA(D/H)-box RNA helicase family protein	N	N
RT1/D1W	856	Pavir.J29669.1	30314506	Pavir.J29669.1.p|PACid:30314506	0.46788	1.38307558323349	<.0001	20	Protein synthesis	protein.synthesis.ribosomal protein.eukaryotic.40S subunit.S13	AT4G00100.1	ribosomal protein S13A	LOC_Os08g02410.1	40S ribosomal protein S13, putative, expressed
RT1/D1W	857	Pavir.J10803.1	30248264	Pavir.J10803.1.p|PACid:30248264	0.69019	1.61349599859078	<.0001	18	Minor CHO metabolism	minor CHO metabolism.others	AT2G37770.2	NAD(P)-linked oxidoreductase superfamily protein	LOC_Os01g62870.1	oxidoreductase, aldo/keto reductase family protein, putative, expressed
RT1/D1W	858	Pavir.Ca00831.1	30206617	Pavir.Ca00831.1.p|PACid:30206617	0.7732	1.70905639088155	<.0001	6	Cell organization	cell.organisation	AT3G04710.3	ankyrin repeat family protein	LOC_Os05g01310.1	ankyrin repeat family protein, putative, expressed
RT1/D1W	859	Pavir.J08684.1	30196067	Pavir.J08684.1.p|PACid:30196067	-0.35202	0.783486325447305	<.0001	27	Major CHO metabolism	major CHO metabolism.degradation.sucrose.invertases.vacuolar	AT1G62660.1	Glycosyl hydrolases family 32 protein	LOC_Os02g01590.1	glycosyl hydrolases, putative, expressed
RT1/D1W	860	Pavir.Ea01634.1	30228385	Pavir.Ea01634.1.p|PACid:30228385	0.5736	1.48823257227459	<.0001	24	Functional enzyme	misc.peroxidases	AT5G66390.1	Peroxidase superfamily protein	LOC_Os01g36240.1	peroxidase precursor, putative, expressed
RT1/D1W	861	Pavir.Ia04371.1	30211168	Pavir.Ia04371.1.p|PACid:30211168	0.2022	1.15045136872088	0.0005	11	Protein degradation	protein.degradation.ubiquitin.proteasom	AT5G35590.1	proteasome alpha subunit A1	LOC_Os03g08280.2	peptidase, T1 family, putative, expressed
RT1/D1W	863	Pavir.J33835.1	30197000	Pavir.J33835.1.p|PACid:30197000	0.21728	1.16253971273931	0.0046	5			AT2G33210.1	heat shock protein 60-2	LOC_Os03g04970.1	T-complex protein, putative, expressed
RT1/D1W	864	Pavir.Ib03617.1	30239717	Pavir.Ib03617.1.p|PACid:30239717	0.4231	1.34080552591644	0.0055	7	Redox balance	redox.ascorbate and glutathione	AT3G48890.1	membrane-associated progesterone binding protein 3	LOC_Os10g35870.1	cytochrome b5-like Heme/Steroid binding domain containing protein, expressed
RT1/D1W	866	Pavir.Aa03150.1	30253492	Pavir.Aa03150.1.p|PACid:30253492	1.2175	2.32543400940824	<.0001	7	Abiotic/biotic stress	stress.abiotic.heat	AT2G25140.1	casein lytic proteinase B4	LOC_Os02g08490.1	chaperone protein clpB 1, putative, expressed
RT1/D1W	867	Pavir.Ib03745.1	30240701	Pavir.Ib03745.1.p|PACid:30240701	-0.1302	0.91370477507141	0.6309	3	Protein targeting & vesicle tansport	cell.vesicle transport	AT4G34660.1	SH3 domain-containing protein	LOC_Os10g36870.1	src homology-3 domain protein 3, putative, expressed
RT1/D1W	868	Pavir.Ba01530.1	30290640	Pavir.Ba01530.1.p|PACid:30290640	0.36757	1.29017789137695	<.0001	55	Pentose phosphate pathway	OPP.non-reductive PP.ribulose-phosphate 3-epimerase	AT3G01850.1	Aldolase-type TIM barrel family protein	LOC_Os09g32810.2	ribulose-phosphate 3-epimerase, putative, expressed
RT1/D1W	869	Pavir.J38345.1	30282660	Pavir.J38345.1.p|PACid:30282660	0.6234	1.54050140694928	<.0001	9	Protein targeting & vesicle tansport	protein.targeting.secretory pathway.unspecified	AT3G56190.1	alpha-soluble NSF attachment protein 2	LOC_Os08g18110.1	alpha-soluble NSF attachment protein, putative, expressed
RT1/D1W	870	Pavir.Db01976.1	30260601	Pavir.Db01976.1.p|PACid:30260601	-0.3668	0.77550070612111	0.0033	10			AT5G20720.1	chaperonin 20	LOC_Os06g09679.1	chaperonin, putative, expressed
RT1/D1W	871	Pavir.J07990.1	30272206	Pavir.J07990.1.p|PACid:30272206	-0.80219	0.573477981256856	<.0001	38	Protein targeting & vesicle tansport	protein.targeting.nucleus	AT5G60980.2	Nuclear transport factor 2 (NTF2) family protein with RNA binding (RRM-RBD-RNP motifs) domain	LOC_Os03g30550.1	RNA-binding protein-like, putative, expressed
RT1/D1W	872	Pavir.Ib03580.1	30238294	Pavir.Ib03580.1.p|PACid:30238294	0.2158	1.16134772378567	<.0001	14			AT5G15270.1	RNA-binding KH domain-containing protein	LOC_Os10g35220.1	KH domain containing protein, putative, expressed
RT1/D1W	873	Pavir.Ca00886.1	30204487	Pavir.Ca00886.1.p|PACid:30204487	0.52279	1.43673102944953	<.0001	18	Signaling regulation	signalling.G-proteins	AT5G42080.1	dynamin-like protein	LOC_Os05g48240.1	dynamin family protein, putative, expressed
RT1/D1W	874	Pavir.J02048.1	30272855	Pavir.J02048.1.p|PACid:30272855	0.4412	1.3577331886204	0.0008	7	RNA processing	RNA.processing.RNA helicase	AT2G42520.1	P-loop containing nucleoside triphosphate hydrolases superfamily protein	N	N
RT1/D1W	875	Pavir.Gb01642.1	30222355	Pavir.Gb01642.1.p|PACid:30222355	1.2967	2.45666305905173	<.0001	8	Redox balance	redox.ascorbate and glutathione.ascorbate	AT4G08390.1	stromal ascorbate peroxidase	LOC_Os04g35520.1	OsAPx7 - Stromal Ascorbate Peroxidase encoding gene 5,8, expressed
RT1/D1W	876	Pavir.Ba00061.1	30292303	Pavir.Ba00061.1.p|PACid:30292303	0.04011	1.02819221940663	0.5969	15	RNA processing	RNA.processing.splicing	AT5G51300.1	splicing factor-related	LOC_Os01g66300.1	KH domain containing protein, putative, expressed
RT1/D1W	878	Pavir.J02380.1	30315992	Pavir.J02380.1.p|PACid:30315992	0.75174	1.68382242431192	<.0001	14	Protein synthesis	protein.synthesis.ribosomal protein.eukaryotic.40S subunit.S18	AT1G34030.1	Ribosomal protein S13/S18 family	LOC_Os03g58050.1	ribosomal protein S13p/S18e, putative, expressed
RT1/D1W	879	Pavir.Ib02285.1	30236791	Pavir.Ib02285.1.p|PACid:30236791	-0.10056	0.932670893472811	0.0939	12	Glycolysis / Lipids metabolism	glycolysis.plastid branch.pyruvate kinase (PK) / lipid metabolism.FA synthesis and FA elongation.pyruvate kinase	AT1G32440.1	plastidial pyruvate kinase 3	LOC_Os10g42100.1	pyruvate kinase, putative, expressed
RT1/D1W	880	Pavir.Ib01166.1	30237619	Pavir.Ib01166.1.p|PACid:30237619	0.2216	1.16602603390352	<.0001	57	Protein targeting & vesicle tansport	protein.targeting.chloroplast	AT3G46740.1	translocon at the outer envelope membrane of chloroplasts 75-III	LOC_Os03g16440.1	outer membrane protein, OMP85 family, putative, expressed
RT1/D1W	881	Pavir.J20383.1	30302010	Pavir.J20383.1.p|PACid:30302010	0.45985	1.37539880763447	<.0001	19	Cell organization	cell.organisation	AT2G38750.1	annexin 4	LOC_Os05g31750.1	annexin, putative, expressed
RT1/D1W	882	Pavir.J37463.1	30219840	Pavir.J37463.1.p|PACid:30219840	0.74122	1.67158880296368	<.0001	10	Lipids metabolism	lipid metabolism.lipid degradation.lysophospholipases.phospholipase D	AT3G15730.1	phospholipase D alpha 1	LOC_Os01g07760.1	phospholipase D, putative, expressed
RT1/D1W	883	Pavir.J03017.3	30296265	Pavir.J03017.3.p|PACid:30296265	0.2039	1.15180780234927	0.2711	2	Protein targeting & vesicle tansport	protein.targeting.peroxisomes	AT5G62810.1	peroxin 14	LOC_Os05g01090.1	pex14, putative, expressed
RT1/D1W	884	Pavir.Ea02983.1	30228167	Pavir.Ea02983.1.p|PACid:30228167	2.15273	4.44668435637535	<.0001	43	TCA cycle	TCA / org transformation.other organic acid transformatons.malic	AT1G79750.1	NADP-malic enzyme 4	LOC_Os01g54030.1	NADP-dependent malic enzyme, putative, expressed
RT1/D1W	885	Pavir.Ia03125.1	30212105	Pavir.Ia03125.1.p|PACid:30212105	-0.08542	0.942510110719721	0.61	4	Amino acid metabolism	amino acid metabolism.synthesis.aromatic aa.chorismate.3-deoxy-D-arabino-heptulosonate 7-phosphate synthase	AT1G22410.1	Class-II DAHP synthetase family protein	LOC_Os03g27230.1	phospho-2-dehydro-3-deoxyheptonate aldolase, chloroplast precursor, putative, expressed
RT1/D1W	886	Pavir.Ca02189.1	30206971	Pavir.Ca02189.1.p|PACid:30206971	2.07671	4.21844122285556	<.0001	35	Phyto-hormone metabolism	hormone metabolism.abscisic acid.induced-regulated-responsive-activated	AT5G13200.1	GRAM domain family protein	LOC_Os12g29400.1	GRAM domain containing protein, expressed
RT1/D1W	887	Pavir.J12278.1	30248016	Pavir.J12278.1.p|PACid:30248016	-0.04141	0.97170479961688	0.3539	29	Unclassified	not assigned.no ontology	AT1G27430.1	GYF domain-containing protein	LOC_Os01g69990.1	GYF domain containing protein, putative, expressed
RT1/D1W	888	Pavir.Gb02335.1	30223182	Pavir.Gb02335.1.p|PACid:30223182	0.8477	1.79962959822102	<.0001	55	Calvin cycle / Pentose phosphate pathway	PS.calvin cycle.transketolase / OPP.non-reductive PP.transketolase	AT2G45290.1	Transketolase	LOC_Os04g19740.1	transketolase, chloroplast precursor, putative, expressed
RT1/D1W	889	Pavir.Fa00148.1	30186716	Pavir.Fa00148.1.p|PACid:30186716	0.1926	1.14282143410224	0.2702	5	TCA cycle	TCA / org transformation.TCA.pyruvate DH.E1	AT5G50850.1	Transketolase family protein	LOC_Os08g42410.1	transketolase, putative, expressed
RT1/D1W	890	Pavir.Ea00392.1	30229226	Pavir.Ea00392.1.p|PACid:30229226	0.9801	1.97260213460891	<.0001	6	Lipids metabolism	lipid metabolism.lipid degradation.lysophospholipases.phospholipase D	AT3G15730.1	phospholipase D alpha 1	LOC_Os01g07760.1	phospholipase D, putative, expressed
RT1/D1W	891	Pavir.J00423.1	30202066	Pavir.J00423.1.p|PACid:30202066	-0.1166	0.922358814628631	0.0372	30	Unclassified	not assigned.unknown	AT3G10650.1	N	LOC_Os03g57430.1	expressed protein
RT1/D1W	892	Pavir.Eb03654.1	30310680	Pavir.Eb03654.1.p|PACid:30310680	0.06676	1.04736187838267	0.2284	8	Cell wall synthesis / modification	cell wall.precursor synthesis.UXS	AT3G53520.1	UDP-glucuronic acid decarboxylase 1	LOC_Os03g17230.1	NAD dependent epimerase/dehydratase family domain containing protein, expressed
RT1/D1W	893	Pavir.J36098.1	30285683	Pavir.J36098.1.p|PACid:30285683	0.07965	1.05676163748841	0.231	22	Redox balance	redox.thioredoxin.PDIL	AT3G16110.1	PDI-like 1-6	LOC_Os06g06790.1	OsPDIL1-5 protein disulfide isomerase PDIL1-5, expressed
RT1/D1W	894	Pavir.Ab00020.1	30233621	Pavir.Ab00020.1.p|PACid:30233621	1.2759	2.4214983166108	<.0001	3	Unclassified	not assigned.no ontology.pentatricopeptide (PPR) repeat-containing protein	AT4G22670.1	HSP70-interacting protein 1	LOC_Os02g01030.2	tetratricopeptide repeat domain containing protein, expressed
RT1/D1W	895	Pavir.J34423.1	30282385	Pavir.J34423.1.p|PACid:30282385	0.93114	1.9067821168894	<.0001	38	Glycolysis	glycolysis.cytosolic branch.phospho-enol-pyruvate carboxylase (PEPC)	AT1G53310.1	phosphoenolpyruvate carboxylase 1	LOC_Os09g14670.1	phosphoenolpyruvate carboxylase, putative, expressed
RT1/D1W	896	Pavir.J17192.1	30273481	Pavir.J17192.1.p|PACid:30273481	-0.20111	0.869881025066274	0.0261	6	Protein synthesis	protein.synthesis.ribosomal protein.eukaryotic.40S subunit.S8	AT5G20290.1	Ribosomal protein S8e family protein	LOC_Os04g28180.1	ribosomal protein, putative, expressed
RT1/D1W	897	Pavir.Ca00785.1	30204822	Pavir.Ca00785.1.p|PACid:30204822	0.35005	1.27460480098999	<.0001	3	Protein modification	protein.postranslational modification.kinase.receptor like cytoplasmatic kinase VIII	AT2G47060.1	Protein kinase superfamily protein	LOC_Os05g04520.1	protein kinase, putative, expressed
RT1/D1W	898	Pavir.Hb00154.1	30265865	Pavir.Hb00154.1.p|PACid:30265865	-0.27949	0.823882212327697	<.0001	31	Protein targeting & vesicle tansport	cell.vesicle transport	AT4G12770.2	Chaperone DnaJ-domain superfamily protein	LOC_Os01g25320.1	auxilin, putative, expressed
RT1/D1W	899	Pavir.J02762.1	30202502	Pavir.J02762.1.p|PACid:30202502	0.7424	1.67295657758589	0.0428	3	Mitochondrial electron transport / ATP synthesis	mitochondrial electron transport / ATP synthesis.cytochrome c	AT1G22840.1	CYTOCHROME C-1	LOC_Os05g34770.1	cytochrome c, putative, expressed
RT1/D1W	900	Pavir.Eb02060.1	30313733	Pavir.Eb02060.1.p|PACid:30313733	0.09965	1.07151348020981	0.1715	15			AT3G15010.1	RNA-binding (RRM/RBD/RNP motifs) family protein	LOC_Os01g42820.1	RNA recognition motif containing protein, putative, expressed
RT1/D1W	901	Pavir.Aa02787.1	30250391	Pavir.Aa02787.1.p|PACid:30250391	1.0977	2.14013232257393	<.0001	4	Glycolysis	glycolysis.cytosolic branch.phospho-enol-pyruvate carboxylase (PEPC)	AT3G14940.1	phosphoenolpyruvate carboxylase 3	LOC_Os02g14770.1	phosphoenolpyruvate carboxylase, putative, expressed
RT1/D1W	902	Pavir.Ea03953.1	30226595	Pavir.Ea03953.1.p|PACid:30226595	0.72803	1.65637576567674	<.0001	12	Metal binding	metal handling	AT4G14030.1	selenium-binding protein 1	LOC_Os01g68770.1	selenium-binding protein, putative, expressed
RT1/D1W	903	Pavir.Ha01827.1	30318630	Pavir.Ha01827.1.p|PACid:30318630	0.14688	1.10717248863551	0.0092	28	Cell organization	cell.organisation	AT1G43700.1	VIRE2-interacting protein 1	LOC_Os12g06520.1	bZIP transcription factor domain containing protein, expressed
RT1/D1W	904	Pavir.J00408.1	30195440	Pavir.J00408.1.p|PACid:30195440	0.29437	1.22634933474163	0.0001	22	Redox balance	redox.ascorbate and glutathione	AT2G32720.1	cytochrome B5 isoform B	LOC_Os05g01820.1	cytochrome b5-like Heme/Steroid binding domain containing protein, expressed
RT1/D1W	905	Pavir.J34947.1	30195916	Pavir.J34947.1.p|PACid:30195916	0.34316	1.26853207623407	<.0001	21	Cell wall synthesis / modification	cell wall.degradation.mannan-xylose-arabinose-fucose	AT5G64570.1	beta-D-xylosidase 4	LOC_Os04g54810.1	beta-D-xylosidase, putative, expressed
RT1/D1W	906	Pavir.Ga01435.1	30303910	Pavir.Ga01435.1.p|PACid:30303910	0.8192	1.76442731500439	<.0001	5	Secondary metabolism	secondary metabolism.N misc.betaine.betaine-aldehyde dehydrogenase	AT3G48170.1	aldehyde dehydrogenase 10A9	LOC_Os04g39020.1	aldehyde dehydrogenase, putative, expressed
RT1/D1W	907	Pavir.J01294.1	30258572	Pavir.J01294.1.p|PACid:30258572	0.5462	1.46023442809905	0.0687	4	Mitochondrial electron transport / ATP synthesis	mitochondrial electron transport / ATP synthesis.cytochrome c	AT1G22840.1	CYTOCHROME C-1	LOC_Os05g34770.1	cytochrome c, putative, expressed
RT1/D1W	908	Pavir.Bb02859.1	30300249	Pavir.Bb02859.1.p|PACid:30300249	0.46696	1.38219388344558	<.0001	50	RNA processing	RNA.processing.ribonucleases	AT3G20390.1	endoribonuclease L-PSP family protein	LOC_Os07g33240.1	endoribonuclease, putative, expressed
RT1/D1W	909	Pavir.Fb01976.1	30278006	Pavir.Fb01976.1.p|PACid:30278006	-0.41595	0.749525777011594	<.0001	17	Cell division & Cell cycle	cell.cycle.peptidylprolyl isomerase	AT3G25230.1	rotamase FKBP 1	LOC_Os08g41390.1	peptidyl-prolyl isomerase, putative, expressed
RT1/D1W	912	Pavir.J27044.1	30263485	Pavir.J27044.1.p|PACid:30263485	-0.16308	0.893116326094546	0.0058	20			AT1G17640.1	RNA-binding (RRM/RBD/RNP motifs) family protein	LOC_Os02g12850.1	RNA recognition motif containing protein, expressed
RT1/D1W	914	Pavir.Ba03289.1	30293402	Pavir.Ba03289.1.p|PACid:30293402	0.13	1.09429370126074	0.2208	8			AT5G66680.1	dolichyl-diphosphooligosaccharide-protein glycosyltransferase 48kDa subunit family protein	LOC_Os07g10830.1	dolichyl-diphosphooligosaccharide--protein glycosyltransferase 48 kDasubunit precursor, putative, expressed
RT1/D1W	916	Pavir.Gb01625.1	30224150	Pavir.Gb01625.1.p|PACid:30224150	0.1554	1.11373036705056	0.1692	6	Protein targeting & vesicle tansport	protein.targeting.chloroplast	AT5G16620.1	hydroxyproline-rich glycoprotein family protein	LOC_Os04g35900.1	translocon Tic40, putative, expressed
RT1/D1W	917	Pavir.J39506.1	30190908	Pavir.J39506.1.p|PACid:30190908	0.13035	1.09455921077375	0.0003	27	Amino acid metabolism	amino acid metabolism.synthesis.aromatic aa.tryptophan.anthranilate phosphoribosyltransferase	AT5G17990.1	tryptophan biosynthesis 1	LOC_Os03g03450.1	anthranilate phosphoribosyltransferase, chloroplast precursor, putative, expressed
RT1/D1W	919	Pavir.J01661.1	30306688	Pavir.J01661.1.p|PACid:30306688	0.364	1.28698924730127	0.0509	2	Cell organization	cell.organisation	AT3G04710.3	ankyrin repeat family protein	LOC_Os05g01310.1	ankyrin repeat family protein, putative, expressed
RT1/D1W	920	Pavir.Ca00552.1	30206711	Pavir.Ca00552.1.p|PACid:30206711	-0.11773	0.921636654118579	0.0156	48	Protein degradation	protein.degradation.ubiquitin.proteasom	AT2G39990.1	eukaryotic translation initiation factor 2	LOC_Os05g01450.1	eukaryotic translation initiation factor 3 subunit F, putative, expressed
RT1/D1W	921	Pavir.J02395.1	30315736	Pavir.J02395.1.p|PACid:30315736	1.7344	3.3274108197896	<.0001	5	Abiotic/biotic stress	stress.abiotic.heat	AT1G74310.1	heat shock protein 101	LOC_Os05g44340.1	heat shock protein 101, putative, expressed
RT1/D1W	924	Pavir.Fa00725.1	30186378	Pavir.Fa00725.1.p|PACid:30186378	-0.2319	0.8515127280681	0.2367	3	Lightreaction	PS.lightreaction.other electron carrier (ox/red).ferredoxin	AT1G02180.1	ferredoxin-related	LOC_Os08g35710.1	expressed protein
RT1/D1W	926	Pavir.Fa00230.1	30186758	Pavir.Fa00230.1.p|PACid:30186758	-0.14372	0.905182124678559	0.0059	28	Unclassified	not assigned.unknown	AT5G53620.1	N	LOC_Os08g43060.1	expressed protein
RT1/D1W	927	Pavir.Bb03594.1	30299157	Pavir.Bb03594.1.p|PACid:30299157	-0.4314	0.741541839361757	<.0001	48	Protein synthesis	protein.synthesis.elongation	AT5G19510.1	Translation elongation factor EF1B/ribosomal protein S6 family protein	LOC_Os07g46750.1	elongation factor protein, putative, expressed
RT1/D1W	928	Pavir.J22701.1	30315152	Pavir.J22701.1.p|PACid:30315152	0.28513	1.21852005851495	<.0001	21	Amino acid metabolism	amino acid metabolism.synthesis.aromatic aa.tryptophan.anthranilate phosphoribosyltransferase	AT5G17990.1	tryptophan biosynthesis 1	LOC_Os03g03450.1	anthranilate phosphoribosyltransferase, chloroplast precursor, putative, expressed
RT1/D1W	929	Pavir.Ia01140.1	30211245	Pavir.Ia01140.1.p|PACid:30211245	0.3807	1.30197342365558	0.0022	10	Abiotic/biotic stress	stress.abiotic.heat	AT3G44110.1	DNAJ homologue 3	LOC_Os03g44620.2	chaperone protein dnaJ, putative, expressed
RT1/D1W	930	Pavir.Ia01019.1	30214264	Pavir.Ia01019.1.p|PACid:30214264	-0.29088	0.81740331535716	<.0001	40	Nucleotide metabolism	nucleotide metabolism.deoxynucleotide metabolism.dUTP diphosphatase	AT3G46940.1	DUTP-PYROPHOSPHATASE-LIKE 1	LOC_Os03g46640.1	deoxyuridine 5-triphosphate nucleotidohydrolase, putative, expressed
RT1/D1W	931	Pavir.Ba03966.1	30291963	Pavir.Ba03966.1.p|PACid:30291963	0.18934	1.14024196190158	0.0592	5	Protein modification	protein.postranslational modification	AT1G24510.1	TCP-1/cpn60 chaperonin family protein	LOC_Os06g36700.1	T-complex protein, putative, expressed
RT1/D1W	933	Pavir.Db02044.1	30262480	Pavir.Db02044.1.p|PACid:30262480	-0.21019	0.864423381011526	<.0001	40	Unclassified	not assigned.no ontology.hydroxyproline rich proteins	AT3G13990.2	Kinase-related protein of unknown function (DUF1296)	LOC_Os06g10430.3	protein of unknown function DUF1296 domain containing protein, expressed
RT1/D1W	934	Pavir.Ib01838.1	30239234	Pavir.Ib01838.1.p|PACid:30239234	-0.19138	0.875767611062047	0.0321	15	Unclassified	not assigned.unknown	AT1G78150.3	N	LOC_Os03g27010.1	expressed protein
RT1/D1W	935	Pavir.Ib01540.1	30237822	Pavir.Ib01540.1.p|PACid:30237822	2.17619	4.51958403910504	<.0001	38	Glycolysis	glycolysis.cytosolic branch.phosphoglycerate mutase	AT3G08590.1	Phosphoglycerate mutase, 2,3-bisphosphoglycerate-independent	LOC_Os03g21260.1	2,3-bisphosphoglycerate-independent phosphoglycerate mutase, putative, expressed
RT1/D1W	937	Pavir.Hb01120.1	30266414	Pavir.Hb01120.1.p|PACid:30266414	-0.1867	0.878613151712397	0.0198	20	Unclassified	not assigned.unknown	AT4G20020.2	N	LOC_Os11g11020.1	DAG protein, chloroplast precursor, putative, expressed
RT1/D1W	938	Pavir.Ga01801.1	30303312	Pavir.Ga01801.1.p|PACid:30303312	1.2002	2.29771521888135	0.0003	2	Redox balance	redox.ascorbate and glutathione.ascorbate	AT4G08390.1	stromal ascorbate peroxidase	LOC_Os04g35520.1	OsAPx7 - Stromal Ascorbate Peroxidase encoding gene 5,8, expressed
RT1/D1W	939	Pavir.Eb00055.1	30311507	Pavir.Eb00055.1.p|PACid:30311507	0.4641	1.37945653515412	<.0001	19	Protein degradation	protein.degradation.serine protease	AT1G47710.1	Serine protease inhibitor (SERPIN) family protein	LOC_Os03g41438.1	serpin domain containing protein, putative, expressed
RT1/D1W	940	Pavir.Ab00954.1	30235445	Pavir.Ab00954.1.p|PACid:30235445	0.7672	1.7019633848839	<.0001	4	Glycolysis	glycolysis.cytosolic branch.phospho-enol-pyruvate carboxylase (PEPC)	AT3G14940.1	phosphoenolpyruvate carboxylase 3	LOC_Os02g14770.1	phosphoenolpyruvate carboxylase, putative, expressed
RT1/D1W	941	Pavir.Db00240.1	30262562	Pavir.Db00240.1.p|PACid:30262562	0.005237	1.00363660825671	0.8615	75	Protein synthesis	protein.synthesis.ribosomal protein.eukaryotic.60S subunit.P3	AT4G25890.1	60S acidic ribosomal protein family	LOC_Os06g48780.1	60S acidic ribosomal protein, putative, expressed
RT1/D1W	942	Pavir.Aa01745.1	30252958	Pavir.Aa01745.1.p|PACid:30252958	-0.11121	0.925811250792588	0.1508	14	Unclassified	not assigned.unknown	AT3G18170.1	Glycosyltransferase family 61 protein	LOC_Os02g22380.1	glycosyltransferase protein, putative, expressed
RT1/D1W	943	Pavir.Cb00828.1	30269884	Pavir.Cb00828.1.p|PACid:30269884	0.60257	1.51841905257224	<.0001	31	Protein synthesis	protein.synthesis.ribosomal protein.eukaryotic.40S subunit.S9	AT5G39850.1	Ribosomal protein S4	LOC_Os03g05980.1	40S ribosomal protein S9-2, putative, expressed
RT1/D1W	944	Pavir.J40638.1	30256303	Pavir.J40638.1.p|PACid:30256303	-0.21755	0.860024700073939	0.0018	23			AT4G17720.1	RNA-binding (RRM/RBD/RNP motifs) family protein	LOC_Os06g02240.1	RNA recognition motif containing protein, putative, expressed
RT1/D1W	946	Pavir.Ia04761.1	30215909	Pavir.Ia04761.1.p|PACid:30215909	0.14607	1.1065510419812	0.0031	27	Protein targeting & vesicle tansport	protein.targeting.mitochondria	AT1G72750.1	translocase inner membrane subunit 23-2	LOC_Os03g02390.1	mitochondrial import inner membrane translocase subunit Tim17, putative, expressed
RT1/D1W	947	Pavir.Fb01674.1	30279153	Pavir.Fb01674.1.p|PACid:30279153	-0.3669	0.775446954371228	0.0349	2	Lightreaction	PS.lightreaction.other electron carrier (ox/red).ferredoxin	AT1G02180.1	ferredoxin-related	LOC_Os08g35710.1	expressed protein
RT1/D1W	948	Pavir.Ia04686.1	30211860	Pavir.Ia04686.1.p|PACid:30211860	0.3818	1.30296650733025	<.0001	7	Mitochondrial electron transport / ATP synthesis	mitochondrial electron transport / ATP synthesis.F1-ATPase	AT2G33040.1	gamma subunit of Mt ATP synthase	LOC_Os10g17280.1	ATP synthase gamma chain, putative, expressed
RT1/D1W	949	Pavir.Aa00504.1	30253559	Pavir.Aa00504.1.p|PACid:30253559	1.22192	2.33256939087892	<.0001	52	Cell organization	cell.organisation	AT5G10230.1	annexin 7	LOC_Os02g51750.1	annexin, putative, expressed
RT1/D1W	950	Pavir.Eb01933.1	30312897	Pavir.Eb01933.1.p|PACid:30312897	0.88529	1.84713588188182	<.0001	19	Phyto-hormone metabolism	hormone metabolism.auxin.induced-regulated-responsive-activated	AT1G60750.1	NAD(P)-linked oxidoreductase superfamily protein	LOC_Os01g43090.1	oxidoreductase, aldo/keto reductase family protein, putative, expressed
RT1/D1W	951	Pavir.Aa00985.1	30250385	Pavir.Aa00985.1.p|PACid:30250385	0.60334	1.5192296845512	<.0001	45	Protein degradation	protein.degradation	AT4G17830.1	Peptidase M20/M25/M40 family protein	LOC_Os02g46520.1	hydrolase, putative, expressed
RT1/D1W	952	Pavir.Ab02963.1	30233340	Pavir.Ab02963.1.p|PACid:30233340	0.3633	1.28636494769182	0.062	4	Functional enzyme	misc.dynamin	AT1G10290.1	dynamin-like protein 6	LOC_Os02g50550.1	dynamin, putative, expressed
RT1/D1W	953	Pavir.J13091.1	30257954	Pavir.J13091.1.p|PACid:30257954	-0.4302	0.742158893113888	0.0037	10	DNA synthesis	DNA.synthesis/chromatin structure.histone.core.H2A	AT5G02560.1	histone H2A 12	LOC_Os01g31800.1	Core histone H2A/H2B/H3/H4 domain containing protein, putative, expressed
RT1/D1W	954	Pavir.Ba01531.1	30291764	Pavir.Ba01531.1.p|PACid:30291764	0.14122	1.10283732453498	0.0298	10	Protein degradation	protein.degradation.ubiquitin.proteasom	AT3G60820.1	N-terminal nucleophile aminohydrolases (Ntn hydrolases) superfamily protein	LOC_Os09g32800.1	peptidase, T1 family, putative, expressed
RT1/D1W	955	Pavir.Ib04487.1	30238677	Pavir.Ib04487.1.p|PACid:30238677	-0.01097	0.99242501136921	0.8805	6	Regulation of transcription	RNA.regulation of transcription.CCAAT box binding factor family, HAP5	AT1G07980.1	nuclear factor Y, subunit C10	LOC_Os03g63530.1	histone-like transcription factor and archaeal histone, putative, expressed
RT1/D1W	956	Pavir.Ba03256.1	30289705	Pavir.Ba03256.1.p|PACid:30289705	0.10522	1.07565840766173	0.0298	27	Cell wall synthesis / modification	cell wall.cellulose synthesis.cellulose synthase	AT5G05170.1	Cellulose synthase family protein	LOC_Os07g10770.1	CESA8 - cellulose synthase, expressed
RT1/D1W	957	Pavir.Eb00368.1	30311703	Pavir.Eb00368.1.p|PACid:30311703	0.66918	1.59016888931644	<.0001	8	Fermentation	fermentation.PDC	AT5G17380.1	Thiamine pyrophosphate dependent pyruvate decarboxylase family protein	LOC_Os01g32080.1	thiamine pyrophosphate enzyme, C-terminal TPP binding domain containing protein, expressed
RT1/D1W	958	Pavir.J33297.1	30273826	Pavir.J33297.1.p|PACid:30273826	-0.09714	0.934884471594477	0.1042	20	Protein synthesis	protein.synthesis.initiation	AT1G13020.1	eukaryotic initiation factor 4B2	LOC_Os04g40400.1	eukaryotic translation initiation factor 4B, putative, expressed
RT1/D1W	959	Pavir.Ia03032.1	30213777	Pavir.Ia03032.1.p|PACid:30213777	0.13401	1.09733954373099	0.0008	38	Abiotic/biotic stress	stress.biotic	AT2G36800.1	don-glucosyltransferase 1	LOC_Os03g24430.1	cytokinin-O-glucosyltransferase 3, putative, expressed
RT1/D1W	960	Pavir.J34391.1	30190005	Pavir.J34391.1.p|PACid:30190005	0.117	1.08447740884306	0.3211	5	Development	development.unspecified	AT5G22330.1	P-loop containing nucleoside triphosphate hydrolases superfamily protein	LOC_Os01g62040.1	ruvB-like, putative, expressed
RT1/D1W	961	Pavir.Da01883.1	30194427	Pavir.Da01883.1.p|PACid:30194427	-0.2721	0.828113258908093	0.1667	6			AT5G20720.1	chaperonin 20	LOC_Os06g09679.1	chaperonin, putative, expressed
RT1/D1W	962	Pavir.Gb01298.1	30221454	Pavir.Gb01298.1.p|PACid:30221454	-0.21846	0.859482398560615	<.0001	27	RNA processing	RNA.processing	AT1G49760.1	poly(A) binding protein 8	LOC_Os04g42600.1	polyadenylate-binding protein, putative, expressed
RT1/D1W	963	Pavir.Eb03656.1	30310604	Pavir.Eb03656.1.p|PACid:30310604	0.34889	1.27358036597405	0.0007	4	Development	development.unspecified	AT5G22330.1	P-loop containing nucleoside triphosphate hydrolases superfamily protein	LOC_Os01g62040.1	ruvB-like, putative, expressed
RT1/D1W	964	Pavir.J35937.1	30267464	Pavir.J35937.1.p|PACid:30267464	0.5257	1.43963192434431	<.0001	11	Protein synthesis	protein.aa activation.lysine-tRNA ligase	AT3G11710.1	lysyl-tRNA synthetase 1	LOC_Os03g38980.2	tRNA synthetases class II domain containing protein, expressed
RT1/D1W	965	Pavir.Bb03604.1	30299956	Pavir.Bb03604.1.p|PACid:30299956	0.53283	1.44676439631332	<.0001	34	Functional enzyme	misc.peroxidases	AT5G05340.1	Peroxidase superfamily protein	LOC_Os07g47990.1	peroxidase precursor, putative, expressed
RT1/D1W	966	Pavir.J33423.1	30208153	Pavir.J33423.1.p|PACid:30208153	0.52424	1.43817576114171	<.0001	51	Abiotic/biotic stress	stress.abiotic.heat	AT2G20560.1	DNAJ heat shock family protein	LOC_Os05g48810.1	dnaJ domain containing protein, expressed
RT1/D1W	967	Pavir.Ib00493.1	30239002	Pavir.Ib00493.1.p|PACid:30239002	0.16034	1.117550480208	0.0619	4	Protein degradation	protein.degradation.ubiquitin.proteasom	AT2G05840.1	20S proteasome subunit PAA2	LOC_Os03g08280.2	peptidase, T1 family, putative, expressed
RT1/D1W	968	Pavir.Bb03407.1	30299494	Pavir.Bb03407.1.p|PACid:30299494	0.40438	1.32352000378139	<.0001	16	Protein synthesis	protein.synthesis.ribosomal protein.eukaryotic.40S subunit.S9	AT5G39850.1	Ribosomal protein S4	LOC_Os03g05980.1	40S ribosomal protein S9-2, putative, expressed
RT1/D1W	969	Pavir.Cb02062.1	30269404	Pavir.Cb02062.1.p|PACid:30269404	-0.29993	0.812291808044452	<.0001	27	DNA repair	DNA.repair	AT2G24490.1	replicon protein A2	LOC_Os02g58220.1	RPA2A - Putative single-stranded DNA binding complex subunit 2, expressed
RT1/D1W	971	Pavir.Ca00211.1	30205500	Pavir.Ca00211.1.p|PACid:30205500	0.06827	1.04845867592422	0.251	23	Cell organization	cell.organisation	AT1G43700.1	VIRE2-interacting protein 1	LOC_Os12g06520.1	bZIP transcription factor domain containing protein, expressed
RT1/D1W	972	Pavir.J08987.1	30282940	Pavir.J08987.1.p|PACid:30282940	0.08622	1.06158508024258	0.4783	2	Secondary metabolism / TCA cycle	secondary metabolism.sulfur-containing.glucosinolates.synthesis.aliphatic.methylthioalkylmalate isomerase large subunit (MAM-IL) / TCA / org transformation.other organic acid transformatons.aconitase	AT4G13430.1	isopropyl malate isomerase large subunit 1	LOC_Os02g03260.1	3-isopropylmalate dehydratase large subunit 2, putative, expressed
RT1/D1W	973	Pavir.Ea00791.1	30231514	Pavir.Ea00791.1.p|PACid:30231514	-0.19045	0.876332336401961	0.0009	19	Secondary metabolism	secondary metabolism.isoprenoids.non-mevalonate pathway.DXR	AT5G62790.1	1-deoxy-D-xylulose 5-phosphate reductoisomerase	LOC_Os01g01710.1	1-deoxy-D-xylulose 5-phosphate reductoisomerase, chloroplast precursor, putative, expressed
RT1/D1W	975	Pavir.J16784.1	30274494	Pavir.J16784.1.p|PACid:30274494	0.34664	1.27159566208996	<.0001	21	Unclassified	not assigned.unknown	AT2G32240.1	N	N	N
RT1/D1W	976	Pavir.Fb00369.1	30279631	Pavir.Fb00369.1.p|PACid:30279631	0.98726	1.98241636197813	<.0001	11	Redox balance	redox.ascorbate and glutathione.ascorbate	AT1G63940.2	monodehydroascorbate reductase 6	LOC_Os08g05570.3	monodehydroascorbate reductase, putative, expressed
RT1/D1W	977	Pavir.Fa00171.1	30187642	Pavir.Fa00171.1.p|PACid:30187642	0.15803	1.11576252371316	0.0143	27	Protein synthesis	protein.synthesis.ribosomal protein.eukaryotic.40S subunit.S25	AT2G21580.1	Ribosomal protein S25 family protein	LOC_Os08g44480.1	40S ribosomal protein S25, putative, expressed
RT1/D1W	978	Pavir.J04806.1	30272567	Pavir.J04806.1.p|PACid:30272567	0.22022	1.1649112130078	<.0001	57	Secondary metabolism	secondary metabolism.phenylpropanoids.lignin biosynthesis.CCoAOMT	AT4G34050.1	S-adenosyl-L-methionine-dependent methyltransferases superfamily protein	LOC_Os06g06980.1	caffeoyl-CoA O-methyltransferase, putative, expressed
RT1/D1W	979	Pavir.Cb00205.1	30270312	Pavir.Cb00205.1.p|PACid:30270312	0.33628	1.26249703528902	<.0001	33	Amino acid metabolism	amino acid metabolism.degradation.serine-glycine-cysteine group.cysteine	AT1G79230.1	mercaptopyruvate sulfurtransferase 1	LOC_Os12g41500.1	rhodanese-like domain containing protein, putative, expressed
RT1/D1W	980	Pavir.Gb01341.1	30223687	Pavir.Gb01341.1.p|PACid:30223687	0.01394	1.00970930409402	0.8741	10	Unclassified	not assigned.no ontology	AT1G67170.1	N	LOC_Os04g40300.1	transglutaminase, putative, expressed
RT1/D1W	981	Pavir.Ha01587.1	30317450	Pavir.Ha01587.1.p|PACid:30317450	-0.01322	0.990878450329679	0.8414	18	Protein targeting & vesicle tansport	cell.vesicle transport	AT1G76970.1	Target of Myb protein 1	LOC_Os11g09329.1	VHS and GAT domain containing protein, expressed
RT1/D1W	982	Pavir.Ia03535.1	30211090	Pavir.Ia03535.1.p|PACid:30211090	2.2692	4.82055748482613	<.0001	7	Protein targeting & vesicle tansport	protein.targeting.mitochondria	AT4G16160.2	Mitochondrial import inner membrane translocase subunit Tim17/Tim22/Tim23 family protein	LOC_Os03g19290.1	mitochondrial import inner membrane translocase subunit Tim17, putative, expressed
RT1/D1W	983	Pavir.J08215.1	30287779	Pavir.J08215.1.p|PACid:30287779	0.2176	1.1627976008987	0.0816	3	Fermentation	fermentation.PDC	AT5G01320.1	Thiamine pyrophosphate dependent pyruvate decarboxylase family protein	LOC_Os03g18220.1	pyruvate decarboxylase isozyme 2, putative, expressed
RT1/D1W	984	Pavir.Ba03341.1	30288513	Pavir.Ba03341.1.p|PACid:30288513	0.2778	1.21234474074392	0.0538	3	Unclassified	not assigned.no ontology.tetratricopeptide repeat (TPR)	AT3G52140.4	tetratricopeptide repeat (TPR)-containing protein	LOC_Os02g48620.1	tetratricopeptide repeat, putative, expressed
RT1/D1W	985	Pavir.Ib00803.1	30239116	Pavir.Ib00803.1.p|PACid:30239116	0.368	1.29056249045178	0.0315	10	protein synthesis / Signaling regulation	protein.synthesis.ribosome biogenesis.Pre-rRNA processing and modifications.snoRNPs / signalling.G-proteins	AT3G18610.1	nucleolin like 2	LOC_Os04g52960.1	nucleolin, putative, expressed
RT1/D1W	986	Pavir.Aa03480.1	30252751	Pavir.Aa03480.1.p|PACid:30252751	-0.08803	0.940806543788282	0.3377	17	Abiotic/biotic stress	stress.abiotic.cold	AT4G36020.1	cold shock domain protein 1	LOC_Os02g02870.1	glycine-rich protein 2, putative, expressed
RT1/D1W	987	Pavir.Ea01535.1	30226804	Pavir.Ea01535.1.p|PACid:30226804	0.2237	1.1677245478713	0.0908	2	Protein degradation	protein.degradation.ubiquitin.ubiquitin protease	AT1G51710.1	ubiquitin-specific protease 6	LOC_Os01g36930.1	ubiquitin carboxyl-terminal hydrolase 6, putative, expressed
RT1/D1W	988	Pavir.Ga00514.2	30305072	Pavir.Ga00514.2.p|PACid:30305072	-0.72943	0.60314216456236	<.0001	24	Unclassified	not assigned.no ontology.C2 domain-containing protein	AT1G63220.1	Calcium-dependent lipid-binding (CaLB domain) family protein	LOC_Os04g58570.1	C2 domain containing protein, putative, expressed
RT1/D1W	989	Pavir.Cb01888.1	30268423	Pavir.Cb01888.1.p|PACid:30268423	0.11403	1.08224714898853	0.1559	7	Cell wall synthesis / modification	cell wall.precursor synthesis.KDO pathway.KDO-8-Phosphate Synthase	AT1G79500.1	Aldolase-type TIM barrel family protein	LOC_Os12g10784.1	2-dehydro-3-deoxyphosphooctonate aldolase, putative, expressed
RT1/D1W	990	Pavir.J22774.1	30208065	Pavir.J22774.1.p|PACid:30208065	-0.0133	0.990823505884747	0.8286	15	Protein degradation	protein.degradation.cysteine protease	AT3G62940.2	Cysteine proteinases superfamily protein	LOC_Os04g52850.1	OTU-like cysteine protease family protein, putative, expressed
RT1/D1W	992	Pavir.J17430.1	30307472	Pavir.J17430.1.p|PACid:30307472	0.27374	1.20893778352767	<.0001	42	Pentose phosphate pathway	OPP.oxidative PP.6-phosphogluconate dehydrogenase	AT3G25530.1	glyoxylate reductase 1	LOC_Os02g35500.1	NAD binding domain of 6-phosphogluconate dehydrogenase containing protein, expressed
RT1/D1W	993	Pavir.J02423.1	30254841	Pavir.J02423.1.p|PACid:30254841	0.20732	1.1545414746119	0.0208	11	Protein targeting & vesicle tansport	protein.targeting.secretory pathway.unspecified	AT1G67680.1	SRP72 RNA-binding domain	LOC_Os01g66560.1	signal recognition particle 72 kDa protein, putative, expressed
RT1/D1W	994	Pavir.Aa03192.1	30252830	Pavir.Aa03192.1.p|PACid:30252830	0.8143	1.75844474211251	<.0001	10	Unclassified	not assigned.unknown	AT2G21870.1	copper ion binding;cobalt ion binding;zinc ion binding	LOC_Os02g03860.1	mitochondrial ATP synthase precursor, putative, expressed
RT1/D1W	995	Pavir.Ib03175.1	30241203	Pavir.Ib03175.1.p|PACid:30241203	0.04726	1.03330059054671	0.606	14	Regulation of transcription	RNA.regulation of transcription.putative transcription regulator	AT1G73230.1	Nascent polypeptide-associated complex NAC	LOC_Os10g34180.1	transcription factor BTF3, putative, expressed
RT1/D1W	996	Pavir.Ba00880.1	30292749	Pavir.Ba00880.1.p|PACid:30292749	-0.008018	0.994457761095133	0.9287	29	Phyto-hormone metabolism	hormone metabolism.abscisic acid.synthesis-degradation.synthesis.short chain alcohol dehydrogenmase (ABA2)	AT1G52340.1	NAD(P)-binding Rossmann-fold superfamily protein	LOC_Os04g10000.1	sex determination protein tasselseed-2, putative, expressed
RT1/D1W	997	Pavir.Ea00434.1	30228528	Pavir.Ea00434.1.p|PACid:30228528	0.3565	1.28031606069557	0.0117	5	Regulation of transcription	RNA.regulation of transcription.unclassified	AT5G58470.1	TBP-associated factor 15B	LOC_Os07g19560.1	TATA-binding protein-associated factor 2N, putative, expressed
RT1/D1W	998	Pavir.J37099.1	30190822	Pavir.J37099.1.p|PACid:30190822	0.3265	1.25396753717178	<.0001	10	Unclassified	not assigned.unknown	AT1G30580.1	GTP binding	LOC_Os08g09940.1	GTP-binding protein, putative, expressed
RT1/D1W	999	Pavir.Ga01330.1	30302343	Pavir.Ga01330.1.p|PACid:30302343	-0.28636	0.819968276534589	<.0001	27	RNA processing	RNA.processing	AT1G49760.1	poly(A) binding protein 8	LOC_Os04g42600.1	polyadenylate-binding protein, putative, expressed
RT1/D1W	1000	Pavir.J29377.1	30255147	Pavir.J29377.1.p|PACid:30255147	0.4094	1.32813334409185	0.0067	3	Amino acid metabolism	amino acid metabolism.synthesis.central amino acid metabolism.GABA.Glutamate decarboxylase	AT5G17330.1	glutamate decarboxylase	LOC_Os03g51080.1	glutamate decarboxylase, putative, expressed
RT1/D1W	1001	Pavir.Aa00844.1	30251160	Pavir.Aa00844.1.p|PACid:30251160	0.42051	1.3384006025569	<.0001	12	Protein degradation	protein.degradation.serine protease	AT4G20850.1	tripeptidyl peptidase ii	LOC_Os02g44520.1	OsSub19 - Putative Subtilisin homologue, expressed
RT1/D1W	1002	Pavir.Ib04128.1	30241546	Pavir.Ib04128.1.p|PACid:30241546	0.03988	1.02802831410845	0.6676	6	Abiotic/biotic stress	stress.abiotic.heat	AT3G44110.1	DNAJ homologue 3	LOC_Os03g44620.2	chaperone protein dnaJ, putative, expressed
RT1/D1W	1003	Pavir.Ca01395.1	30206149	Pavir.Ca01395.1.p|PACid:30206149	0.14582	1.10635930791045	<.0001	55	Mitochondrial electron transport / ATP synthesis	mitochondrial electron transport / ATP synthesis.NADH-DH.localisation not clear	AT4G02580.1	NADH-ubiquinone oxidoreductase 24 kDa subunit, putative	LOC_Os05g43360.1	NADH dehydrogenase flavoprotein 2, mitochondrial precursor, putative, expressed
RT1/D1W	1004	Pavir.Ab00683.1	30232297	Pavir.Ab00683.1.p|PACid:30232297	0.85213	1.8051641093701	<.0001	16	TCA cycle	TCA / org transformation.TCA.CS	AT2G44350.1	Citrate synthase family protein	LOC_Os11g33240.1	citrate synthase, putative, expressed
RT1/D1W	1006	Pavir.Cb01903.1	30270024	Pavir.Cb01903.1.p|PACid:30270024	-0.09653	0.935279842820712	0.4431	4	Protein targeting & vesicle tansport	cell.vesicle transport	AT5G05010.1	clathrin adaptor complexes medium subunit family protein	LOC_Os05g24601.1	coatomer subunit delta, putative, expressed
RT1/D1W	1007	Pavir.Ba02709.1	30289357	Pavir.Ba02709.1.p|PACid:30289357	-0.62025	0.650558184809922	<.0001	34	Unclassified	not assigned.unknown	N	N	LOC_Os04g50700.1	pathogenesis-related Bet v I family protein, putative, expressed
RT1/D1W	1008	Pavir.Fb00122.1	30279574	Pavir.Fb00122.1.p|PACid:30279574	0.37791	1.29945799551873	<.0001	45	Nucleotide metabolism	nucleotide metabolism.phosphotransfer and pyrophosphatases.adenylate kinase	AT5G47840.1	adenosine monophosphate kinase	LOC_Os08g01770.1	adenylate kinase, putative, expressed
RT1/D1W	1009	Pavir.Ia02234.1	30215482	Pavir.Ia02234.1.p|PACid:30215482	-0.08723	0.941328382381913	0.191	14	Regulation of transcription	RNA.regulation of transcription.unclassified	AT4G26000.1	RNA-binding KH domain-containing protein	LOC_Os10g41440.1	KH domain containing protein, putative, expressed
RT1/D1W	1010	Pavir.Ab02567.1	30232992	Pavir.Ab02567.1.p|PACid:30232992	0.27436	1.20945743770669	0.0014	8	Protein targeting & vesicle tansport	protein.targeting.secretory pathway.unspecified	AT1G67680.1	SRP72 RNA-binding domain	LOC_Os01g66560.1	signal recognition particle 72 kDa protein, putative, expressed
RT1/D1W	1012	Pavir.Ha00910.1	30317703	Pavir.Ha00910.1.p|PACid:30317703	0.0002213	1.00015340523644	0.9968	40	Phyto-hormone metabolism	hormone metabolism.gibberelin.synthesis-degradation	AT1G52820.1	2-oxoglutarate (2OG) and Fe(II)-dependent oxygenase superfamily protein	LOC_Os08g32170.1	oxidoreductase, 2OG-FeII oxygenase domain containing protein, putative, expressed
RT1/D1W	1013	Pavir.J04260.1	30286760	Pavir.J04260.1.p|PACid:30286760	-0.20856	0.865400584330194	0.0118	15	Unclassified	not assigned.unknown	AT1G29350.1	Kinase-related protein of unknown function (DUF1296)	LOC_Os05g50480.1	protein of unknown function DUF1296 domain containing protein, expressed
RT1/D1W	1014	Pavir.Fa00397.1	30185460	Pavir.Fa00397.1.p|PACid:30185460	-0.36612	0.775866316844856	<.0001	17	Cell division & Cell cycle	cell.cycle.peptidylprolyl isomerase	AT3G25230.1	rotamase FKBP 1	LOC_Os08g41390.2	peptidyl-prolyl isomerase, putative, expressed
RT1/D1W	1015	Pavir.Ga00459.1	30303914	Pavir.Ga00459.1.p|PACid:30303914	0.43914	1.3557958876701	<.0001	19	Unclassified	not assigned.unknown	AT2G32240.1	N	N	N
RT1/D1W	1016	Pavir.J02312.1	30294775	Pavir.J02312.1.p|PACid:30294775	2.54026	5.816938293362	<.0001	57	Unclassified	not assigned.no ontology	AT5G01300.1	PEBP (phosphatidylethanolamine-binding protein) family protein	LOC_Os05g39250.1	phosphatidylethanolamine-binding protein, putative, expressed
RT1/D1W	1017	Pavir.Bb01537.1	30300134	Pavir.Bb01537.1.p|PACid:30300134	0.89269	1.8566347162017	<.0001	6	Functional enzyme	misc.dynamin	AT3G60190.1	DYNAMIN-like 1E	LOC_Os09g39960.1	dynamin family protein, putative, expressed
RT1/D1W	1018	Pavir.J04207.1	30286749	Pavir.J04207.1.p|PACid:30286749	0.304	1.23456260689354	0.0065	8	Redox balance	redox.thioredoxin.PDIL	AT2G47470.1	thioredoxin family protein	LOC_Os05g06430.2	OsPDIL2-1 protein disulfide isomerase PDIL2-1, expressed
RT1/D1W	1019	Pavir.Ia03501.1	30211990	Pavir.Ia03501.1.p|PACid:30211990	0.3887	1.30921315155448	0.0032	5	Transport	transport.metabolite transporters at the mitochondrial membrane	AT5G46800.1	Mitochondrial substrate carrier family protein	LOC_Os10g42299.3	mitochondrial carrier protein, putative, expressed
RT1/D1W	1020	Pavir.J34625.1	30270851	Pavir.J34625.1.p|PACid:30270851	1.2583	2.39213697273636	<.0001	3	Fermentation	fermentation.PDC	AT5G17380.1	Thiamine pyrophosphate dependent pyruvate decarboxylase family protein	LOC_Os01g32080.1	thiamine pyrophosphate enzyme, C-terminal TPP binding domain containing protein, expressed
RT1/D1W	1021	Pavir.Da00434.1	30194088	Pavir.Da00434.1.p|PACid:30194088	0.68618	1.60901748082828	<.0001	17	Amino acid metabolism	amino acid metabolism.synthesis.aromatic aa.tryptophan.tryptophan synthase	AT5G38530.1	tryptophan synthase beta type 2	LOC_Os06g42560.1	tryptophan synthase beta chain 2, putative, expressed
RT1/D1W	1022	Pavir.Ga01589.1	30305317	Pavir.Ga01589.1.p|PACid:30305317	0.0315	1.02207424527978	0.6339	21	Protein synthesis	protein.synthesis.initiation	AT3G26400.1	eukaryotic translation initiation factor 4B1	LOC_Os04g40400.1	eukaryotic translation initiation factor 4B, putative, expressed
RT1/D1W	1023	Pavir.Ia01716.1	30214975	Pavir.Ia01716.1.p|PACid:30214975	0.11273	1.08127238470232	0.178	15	Regulation of transcription	RNA.regulation of transcription.putative transcription regulator	AT1G73230.1	Nascent polypeptide-associated complex NAC	LOC_Os10g34180.1	transcription factor BTF3, putative, expressed
RT1/D1W	1024	Pavir.J03196.1	30284224	Pavir.J03196.1.p|PACid:30284224	0.82317	1.76928934262649	<.0001	25			AT3G10850.1	Metallo-hydrolase/oxidoreductase superfamily protein	LOC_Os03g21460.1	metallo-beta-lactamase family protein, putative, expressed
RT1/D1W	1026	Pavir.Ca00979.1	30204220	Pavir.Ca00979.1.p|PACid:30204220	-0.26723	0.83091338362195	<.0001	12	Signaling regulation	signalling.G-proteins	AT5G55190.1	RAN GTPase 3	LOC_Os05g49890.1	ras-related protein, putative, expressed
RT1/D1W	1027	Pavir.Ib01026.1	30238031	Pavir.Ib01026.1.p|PACid:30238031	1.9865	3.96274463240513	<.0001	9	Abiotic/biotic stress	stress.abiotic.heat	AT4G27670.1	heat shock protein 21	LOC_Os03g14180.1	hsp20/alpha crystallin family protein, putative, expressed
RT1/D1W	1028	Pavir.J07473.1	30307930	Pavir.J07473.1.p|PACid:30307930	0.5487	1.46276701522682	0.0656	2			AT5G66680.1	dolichyl-diphosphooligosaccharide-protein glycosyltransferase 48kDa subunit family protein	LOC_Os07g10830.1	dolichyl-diphosphooligosaccharide--protein glycosyltransferase 48 kDasubunit precursor, putative, expressed
RT1/D1W	1029	Pavir.Ea02919.1	30229249	Pavir.Ea02919.1.p|PACid:30229249	0.1959	1.1454384994814	0.2939	3	Protein synthesis	protein.synthesis.ribosomal protein.eukaryotic.40S subunit.S8	AT5G20290.1	Ribosomal protein S8e family protein	LOC_Os04g28180.1	ribosomal protein, putative, expressed
RT1/D1W	1030	Pavir.Ca01894.1	30207162	Pavir.Ca01894.1.p|PACid:30207162	0.41776	1.33585183384108	<.0001	36	Protein degradation	protein.degradation.ubiquitin.ubiquitin protease	AT5G06600.1	ubiquitin-specific protease 12	LOC_Os12g30540.1	ubiquitin carboxyl-terminal hydrolase, putative, expressed
RT1/D1W	1031	Pavir.Ia03661.1	30213104	Pavir.Ia03661.1.p|PACid:30213104	0.23161	1.17414452487124	0.0007	11	Cell wall synthesis / modification	cell wall.precursor synthesis.UDP-glucose 4,6-dehydratase	AT1G78570.1	rhamnose biosynthesis 1	LOC_Os03g17000.2	NAD dependent epimerase/dehydratase family domain containing protein, expressed
RT1/D1W	1032	Pavir.Ha00031.1	30316749	Pavir.Ha00031.1.p|PACid:30316749	0.5463	1.46033564734468	<.0001	11	Protein degradation	protein.degradation.ubiquitin.proteasom	AT1G53850.1	20S proteasome alpha subunit E1	LOC_Os11g40140.1	peptidase, T1 family, putative, expressed
RT1/D1W	1033	Pavir.Ib02297.1	30239798	Pavir.Ib02297.1.p|PACid:30239798	0.14386	1.10485726357999	0.0823	4	Transport	transport.metabolite transporters at the mitochondrial membrane	AT5G46800.1	Mitochondrial substrate carrier family protein	LOC_Os10g42299.3	mitochondrial carrier protein, putative, expressed
RT1/D1W	1034	Pavir.Eb03917.1	30313557	Pavir.Eb03917.1.p|PACid:30313557	-0.22633	0.854806628282531	0.0007	5			AT4G36960.1	RNA-binding (RRM/RBD/RNP motifs) family protein	LOC_Os01g71770.1	RNA recognition motif containing protein, putative, expressed
RT1/D1W	1035	Pavir.J35336.1	30307348	Pavir.J35336.1.p|PACid:30307348	-0.11625	0.922582607417907	0.0324	15	Signaling regulation	signalling.G-proteins	AT1G02130.1	RAS 5	LOC_Os01g08450.1	ras-related protein, putative, expressed
RT1/D1W	1036	Pavir.J05214.1	30256497	Pavir.J05214.1.p|PACid:30256497	0.18948	1.14035261704066	0.0054	16	Minor CHO metabolism	minor CHO metabolism.others	AT2G37790.1	NAD(P)-linked oxidoreductase superfamily protein	LOC_Os05g38230.2	oxidoreductase, aldo/keto reductase family protein, putative, expressed
RT1/D1W	1037	Pavir.Da00585.1	30193034	Pavir.Da00585.1.p|PACid:30193034	0.2113	1.15773093534137	<.0001	42	Protein targeting & vesicle tansport	protein.targeting.nucleus	AT5G20200.1	nucleoporin-related	LOC_Os06g40460.1	expressed protein
RT1/D1W	1038	Pavir.Aa00724.1	30252876	Pavir.Aa00724.1.p|PACid:30252876	0.6911	1.61451405471763	<.0001	14	Development	development.unspecified	AT1G79280.1	nuclear pore anchor	LOC_Os02g50799.1	nuclear-pore anchor, putative, expressed
RT1/D1W	1039	Pavir.J31997.1	30267312	Pavir.J31997.1.p|PACid:30267312	-0.21659	0.860597169267637	0.0027	19	Unclassified	not assigned.no ontology	AT3G15000.1	cobalt ion binding	LOC_Os09g33480.1	DAG protein, chloroplast precursor, putative, expressed
RT1/D1W	1040	Pavir.Eb00488.1	30311242	Pavir.Eb00488.1.p|PACid:30311242	0.4631	1.37850070005155	0.0366	3	Regulation of transcription	RNA.regulation of transcription.unclassified	AT5G58470.1	TBP-associated factor 15B	LOC_Os07g19560.1	TATA-binding protein-associated factor 2N, putative, expressed
RT1/D1W	1041	Pavir.Fa00382.1	30187283	Pavir.Fa00382.1.p|PACid:30187283	0.07387	1.05253630730159	0.1668	19	Protein degradation	protein.degradation.ubiquitin.proteasom	AT3G60820.1	N-terminal nucleophile aminohydrolases (Ntn hydrolases) superfamily protein	LOC_Os08g41730.1	peptidase, T1 family, putative, expressed
RT1/D1W	1042	Pavir.Ib00757.1	30237948	Pavir.Ib00757.1.p|PACid:30237948	0.42381	1.34146554496686	<.0001	13	Protein synthesis	protein.aa activation.methionine-tRNA ligase	AT4G13780.1	methionine--tRNA ligase, putative / methionyl-tRNA synthetase, putative / MetRS, putative	LOC_Os06g31210.1	methionyl-tRNA synthetase, putative, expressed
RT1/D1W	1044	Pavir.Ia02791.1	30212404	Pavir.Ia02791.1.p|PACid:30212404	0.47539	1.39029400361154	<.0001	7	Protein synthesis	protein.aa activation.alanine-tRNA ligase	AT1G50200.1	Alanyl-tRNA synthetase	LOC_Os10g10244.1	alanyl-tRNA synthetase, putative, expressed
RT1/D1W	1045	Pavir.Ca00513.1	30203659	Pavir.Ca00513.1.p|PACid:30203659	0.2144	1.16022129156184	0.1246	5	Transport	transport.metabolite transporters at the mitochondrial membrane	AT5G19760.1	Mitochondrial substrate carrier family protein	LOC_Os05g11780.1	mitochondrial carrier protein, putative, expressed
RT1/D1W	1046	Pavir.Ba01105.1	30292838	Pavir.Ba01105.1.p|PACid:30292838	0.05301	1.03742712743757	0.5848	5	Protein degradation	protein.degradation.ubiquitin.proteasom	AT1G56450.1	20S proteasome beta subunit G1	LOC_Os09g33986.1	peptidase, T1 family, putative, expressed
RT1/D1W	1047	Pavir.Ib01294.1	30239879	Pavir.Ib01294.1.p|PACid:30239879	0.18849	1.13957035759138	0.0001	25	Amino acid metabolism	amino acid metabolism.synthesis.glutamate family.arginine.acetylglutamate kinase	AT2G37500.1	arginine biosynthesis protein ArgJ family	LOC_Os03g17120.1	arginine biosynthesis bifunctional protein argJ 1, putative, expressed
RT1/D1W	1048	Pavir.J39033.1	30273295	Pavir.J39033.1.p|PACid:30273295	0.79923	1.74017210824422	<.0001	12	Glyoxylate cycle	gluconeogenesis / glyoxylate cycle.Malate DH	AT5G09660.1	peroxisomal NAD-malate dehydrogenase 2	LOC_Os03g56280.1	lactate/malate dehydrogenase, putative, expressed
RT1/D1W	1049	Pavir.Ib02356.1	30241415	Pavir.Ib02356.1.p|PACid:30241415	0.1842	1.13618676279975	0.1487	5	Protein degradation	protein.degradation.ubiquitin	AT2G17200.1	ubiquitin family protein	LOC_Os10g39620.2	ubiquitin family protein, putative, expressed
RT1/D1W	1050	Pavir.J11877.1	30248082	Pavir.J11877.1.p|PACid:30248082	0.41599	1.33421392157954	<.0001	5	Cell wall synthesis / modification	cell wall.degradation.cellulases and beta -1,4-glucanases	AT5G20950.1	Glycosyl hydrolase family protein	LOC_Os03g53800.1	periplasmic beta-glucosidase precursor, putative, expressed
RT1/D1W	1051	Pavir.J16347.1	30307684	Pavir.J16347.1.p|PACid:30307684	2.1373	4.39937932736161	<.0001	26	Cell organization	cell.organisation	AT1G01750.1	actin depolymerizing factor 11	LOC_Os03g60580.1	actin-depolymerizing factor, putative, expressed
RT1/D1W	1052	Pavir.J04310.1	30259290	Pavir.J04310.1.p|PACid:30259290	0.32529	1.25291626537237	<.0001	34	Protein targeting & vesicle tansport	protein.targeting.secretory pathway.unspecified	AT5G60460.1	Preprotein translocase Sec, Sec61-beta subunit protein	LOC_Os12g01260.1	protein transport protein Sec61 subunit beta, putative, expressed
RT1/D1W	1053	Pavir.Bb00543.1	30299044	Pavir.Bb00543.1.p|PACid:30299044	0.40324	1.32247458753206	<.0001	20	Amino acid metabolism	amino acid metabolism.degradation.branched chain group.valine	AT2G14170.1	aldehyde dehydrogenase 6B2	LOC_Os07g09060.1	aldehyde dehydrogenase, putative, expressed
RT1/D1W	1054	Pavir.Ga00980.1	30304151	Pavir.Ga00980.1.p|PACid:30304151	0.36153	1.28478771220262	<.0001	16	Protein degradation	protein.degradation.ubiquitin	AT2G21270.3	ubiquitin fusion degradation 1	LOC_Os04g48770.2	ubiquitin fusion degradation protein, putative, expressed
RT1/D1W	1055	Pavir.J05345.1	30272342	Pavir.J05345.1.p|PACid:30272342	-0.17652	0.884834780314924	0.0083	22	Regulation of transcription	RNA.regulation of transcription.unclassified	AT4G27000.1	RNA-binding (RRM/RBD/RNP motifs) family protein	LOC_Os07g33330.1	RNA recognition motif containing protein, putative, expressed
RT1/D1W	1056	Pavir.Ba03030.1	30293582	Pavir.Ba03030.1.p|PACid:30293582	0.1067	1.07676244645525	0.309	10	Development	development.unspecified	AT4G16280.3	RNA binding;abscisic acid binding	LOC_Os09g03610.1	flowering time control protein FCA, putative, expressed
RT1/D1W	1057	Pavir.J02425.1	30276635	Pavir.J02425.1.p|PACid:30276635	0.30354	1.23416903219058	0.0026	4	Protein degradation	protein.degradation.ubiquitin.proteasom	AT3G60820.1	N-terminal nucleophile aminohydrolases (Ntn hydrolases) superfamily protein	LOC_Os09g32800.1	peptidase, T1 family, putative, expressed
RT1/D1W	1058	Pavir.Da01911.1	30191959	Pavir.Da01911.1.p|PACid:30191959	-0.1631	0.893103944959099	0.1739	10	DNA repair	DNA.repair	AT1G79650.4	Rad23 UV excision repair protein family	LOC_Os06g15360.2	RAD23 DNA repair protein, putative, expressed
RT1/D1W	1059	Pavir.Fb01200.1	30279503	Pavir.Fb01200.1.p|PACid:30279503	0.2957	1.22748040999901	0.0135	8	Functional enzyme	misc.short chain dehydrogenase/reductase (SDR)	AT4G03140.1	NAD(P)-binding Rossmann-fold superfamily protein	LOC_Os07g46840.1	oxidoreductase, short chain dehydrogenase/reductase family domain containing protein, expressed
RT1/D1W	1060	Pavir.Fb02349.1	30278681	Pavir.Fb02349.1.p|PACid:30278681	0.001712	1.00118737234215	0.975	15	Unclassified	not assigned.unknown	AT5G53620.1	N	LOC_Os08g43060.1	expressed protein
RT1/D1W	1061	Pavir.Ib01048.1	30241594	Pavir.Ib01048.1.p|PACid:30241594	1.19633	2.29155990414994	<.0001	8	Transport	transport.p- and v-ATPases	AT4G39080.1	vacuolar proton ATPase A3	LOC_Os03g14690.1	vacuolar ATP synthase 98 kDa subunit, putative, expressed
RT1/D1W	1062	Pavir.Fa00597.1	30188120	Pavir.Fa00597.1.p|PACid:30188120	0.05813	1.0411154074647	0.5058	16	Abiotic/biotic stress	stress.abiotic.heat	AT2G04030.1	Chaperone protein htpG family protein	LOC_Os09g29840.1	heat shock protein, putative, expressed
RT1/D1W	1064	Pavir.Aa00201.1	30250053	Pavir.Aa00201.1.p|PACid:30250053	0.14817	1.10816292057244	0.0059	10	Secondary metabolism	secondary metabolism.isoprenoids.mevalonate pathway.mevalonate diphosphate decarboxylase	AT3G54250.1	GHMP kinase family protein	LOC_Os02g01920.1	GHMP kinases ATP-binding protein, putative, expressed
RT1/D1W	1065	Pavir.Ca00811.1	30204135	Pavir.Ca00811.1.p|PACid:30204135	1.5796	2.98886969173839	<.0001	21	Functional enzyme	misc.acid and other phosphatases	AT4G25150.1	HAD superfamily, subfamily IIIB acid phosphatase	LOC_Os05g10210.1	HAD superfamily phosphatase, putative, expressed
RT1/D1W	1066	Pavir.J29074.1	30220792	Pavir.J29074.1.p|PACid:30220792	0.05893	1.041692884528	0.1375	20	Carbohydrates metabolism	C1-metabolism.Methylenetetrahydrofolate dehydrogenase & Methenyltetrahydrofolate cyclohydrolase	AT3G12290.1	Amino acid dehydrogenase family protein	LOC_Os05g05830.1	bifunctional protein folD, putative, expressed
RT1/D1W	1067	Pavir.Cb00980.1	30269537	Pavir.Cb00980.1.p|PACid:30269537	0.9089	1.87761334388073	<.0001	6	Functional enzyme	misc.gluco-, galacto- and mannosidases.beta-galactosidase	AT2G32810.1	beta galactosidase 9	LOC_Os12g24170.1	beta-galactosidase precursor, putative, expressed
RT1/D1W	1068	Pavir.Ib01852.1	30239506	Pavir.Ib01852.1.p|PACid:30239506	-0.05405	0.963228510485345	0.4291	17	Amino acid metabolism	amino acid metabolism.synthesis.aromatic aa.chorismate.3-deoxy-D-arabino-heptulosonate 7-phosphate synthase	AT1G22410.1	Class-II DAHP synthetase family protein	LOC_Os03g27230.1	phospho-2-dehydro-3-deoxyheptonate aldolase, chloroplast precursor, putative, expressed
RT1/D1W	1069	Pavir.Fb01133.1	30281261	Pavir.Fb01133.1.p|PACid:30281261	0.1054	1.07579262216094	0.675	3			AT4G26780.1	Co-chaperone GrpE family protein	LOC_Os08g25090.2	co-chaperone GrpE protein, putative, expressed
RT1/D1W	1070	Pavir.Ga02371.1	30302920	Pavir.Ga02371.1.p|PACid:30302920	-0.30112	0.811622069343702	0.0003	15	Protein targeting & vesicle tansport	protein.targeting.nucleus	AT5G60980.2	Nuclear transport factor 2 (NTF2) family protein with RNA binding (RRM-RBD-RNP motifs) domain	LOC_Os04g30430.1	nuclear transport factor 2, putative, expressed
RT1/D1W	1071	Pavir.Gb01367.1	30222820	Pavir.Gb01367.1.p|PACid:30222820	0.5643	1.47866988006415	0.0083	2	Pentose phosphate pathway	OPP.oxidative PP.G6PD	AT5G40760.1	glucose-6-phosphate dehydrogenase 6	LOC_Os02g38840.1	glucose-6-phosphate 1-dehydrogenase, cytoplasmic isoform, putative, expressed
RT1/D1W	1073	Pavir.Eb01552.1	30312571	Pavir.Eb01552.1.p|PACid:30312571	0.21603	1.16153288507193	0.0062	11	Protein synthesis	protein.aa activation.asparagine-tRNA ligase	AT5G56680.1	Class II aminoacyl-tRNA and biotin synthetases superfamily protein	LOC_Os01g27520.1	tRNA synthetases class II domain containing protein, expressed
RT1/D1W	1074	Pavir.Bb02933.1	30300552	Pavir.Bb02933.1.p|PACid:30300552	1.31173	2.48239036086911	<.0001	48	Functional enzyme	misc.beta 1,3 glucan hydrolases	AT5G55180.1	O-Glycosyl hydrolases family 17 protein	LOC_Os07g35520.1	glucan endo-1,3-beta-glucosidase precursor, putative, expressed
RT1/D1W	1076	Pavir.Ia03489.1	30214513	Pavir.Ia03489.1.p|PACid:30214513	-0.01584	0.989080602847503	0.8671	6	Glycolysis / Lipids metabolism	glycolysis.plastid branch.pyruvate kinase (PK) / lipid metabolism.FA synthesis and FA elongation.pyruvate kinase	AT5G52920.1	plastidic pyruvate kinase beta subunit 1	LOC_Os10g42100.1	pyruvate kinase, putative, expressed
RT1/D1W	1077	Pavir.Ib01816.1	30236918	Pavir.Ib01816.1.p|PACid:30236918	0.7445	1.67539352155789	<.0001	5	Protein synthesis	protein.synthesis.ribosomal protein.eukaryotic.40S subunit.S9	AT5G39850.1	Ribosomal protein S4	LOC_Os03g05980.1	40S ribosomal protein S9-2, putative, expressed
RT1/D1W	1078	Pavir.Ga01594.1	30304354	Pavir.Ga01594.1.p|PACid:30304354	0.2483	1.18780663784097	0.0334	9	Unclassified	not assigned.no ontology	AT1G67170.1	N	LOC_Os04g40300.1	transglutaminase, putative, expressed
RT1/D1W	1079	Pavir.J14255.1	30217612	Pavir.J14255.1.p|PACid:30217612	0.5936	1.50900752479012	<.0001	27	Cell wall synthesis / modification	cell wall.degradation.mannan-xylose-arabinose-fucose	AT1G78060.1	Glycosyl hydrolase family protein	LOC_Os02g51620.1	glycosyl hydrolase family 3 protein, putative, expressed
RT1/D1W	1080	Pavir.Ca02304.1	30205601	Pavir.Ca02304.1.p|PACid:30205601	-0.09329	0.937382651716631	0.2876	8	Abiotic/biotic stress	stress.abiotic.unspecified	AT1G70840.1	MLP-like protein 31	LOC_Os12g36830.1	pathogenesis-related Bet v I family protein, putative, expressed
RT1/D1W	1081	Pavir.Cb01708.1	30267632	Pavir.Cb01708.1.p|PACid:30267632	0.1773	1.13076567879133	0.2016	3	Transport	transport.metabolite transporters at the mitochondrial membrane	AT5G19760.1	Mitochondrial substrate carrier family protein	LOC_Os05g11780.1	mitochondrial carrier protein, putative, expressed
RT1/D1W	1082	Pavir.J06234.1	30307099	Pavir.J06234.1.p|PACid:30307099	1.2438	2.36821489665418	<.0001	6	Carbohydrates metabolism	C1-metabolism.formate dehydrogenase	AT5G14780.1	formate dehydrogenase	LOC_Os06g29180.1	erythronate-4-phosphate dehydrogenase domain containing protein, expressed
[truncated: 6,250 more rows]

## Sheet: RT2inD3W
Tissue/Treatment	pro_hit_num	pro_acc	pro_ID	pro_acc_ID	log2_fold	fold_change	p_value	num_pep	Functional group at	Funtion description at	at_acc	at_annota	os_acc	os_annota
[truncated: 6,883 more rows]

[truncated: 4 more sheets: RT1inD3W, RT2inD1W, RT2inSDT, RT1inSDT]
